# Supplementary material for: Comprehensive Analysis of Co-Mutations Identifies Cooperating Mechanisms of Tumorigenesis
Source: Cancers (Basel). 2022 Jan 14;14(2):415. doi: 10.3390/cancers14020415 (PMC8774165; doi:10.3390/cancers14020415)
Supplement: Supplementary file 1 [file cancers-14-00415-s001.zip]

Archive with 9 entries (9 files):
- Supplementary Table S1.csv
- Supplementary Table S2.csv
- Supplementary Table S3.csv
- Supplementary Table S4.csv
- Supplementary Table S5.csv
- Supplementary Table S6.csv
- Supplementary Table S7.csv
- Supplementary Table S8.csv
- SupplementaryFigures.pdf
