# Supplementary material for: Comprehensive Analysis of Co-Mutations Identifies Cooperating Mechanisms of Tumorigenesis
Source: Cancers (Basel). 2022 Jan 14;14(2):415. doi: 10.3390/cancers14020415 (PMC8774165; doi:10.3390/cancers14020415)
Supplement: Supplementary file 1 [file cancers-14-00415-s001.zip › Supplementary Table S2.csv]

site1	gene1	Type1	site2	gene2	Type2	project	cnum	anum	frequency	database	NCBI_Build
2:148683686	ACVR2A	protein_coding	1:6257785	RPL22	protein_coding	Colon Colorectal Cancer	18	76	0.236842105263158	DepMap	GRCh37
1:6257785	RPL22	protein_coding	1:200594042	DDX59	protein_coding	Colon Colorectal Cancer	15	76	0.197368421052632	DepMap	GRCh37
1:6257785	RPL22	protein_coding	20:47858504	DDX27	protein_coding	Colon Colorectal Cancer	12	76	0.157894736842105	DepMap	GRCh37
2:148683686	ACVR2A	protein_coding	1:200594042	DDX59	protein_coding	Colon Colorectal Cancer	12	76	0.157894736842105	DepMap	GRCh37
1:6257785	RPL22	protein_coding	8:95686611	ESRP1	protein_coding	Colon Colorectal Cancer	12	76	0.157894736842105	DepMap	GRCh37
2:148683686	ACVR2A	protein_coding	5:36985083	NIPBL	protein_coding	Colon Colorectal Cancer	12	76	0.157894736842105	DepMap	GRCh37
1:6257785	RPL22	protein_coding	5:36985083	NIPBL	protein_coding	Colon Colorectal Cancer	12	76	0.157894736842105	DepMap	GRCh37
1:6257785	RPL22	protein_coding	1:24078404	TCEB3	NA	Colon Colorectal Cancer	12	76	0.157894736842105	DepMap	GRCh37
2:148683686	ACVR2A	protein_coding	20:47858504	DDX27	protein_coding	Colon Colorectal Cancer	11	76	0.144736842105263	DepMap	GRCh37
2:148683686	ACVR2A	protein_coding	8:95686611	ESRP1	protein_coding	Colon Colorectal Cancer	11	76	0.144736842105263	DepMap	GRCh37
2:148683686	ACVR2A	protein_coding	1:24078404	TCEB3	NA	Colon Colorectal Cancer	11	76	0.144736842105263	DepMap	GRCh37
1:6257785	RPL22	protein_coding	17:48433967	XYLT2	protein_coding	Colon Colorectal Cancer	11	76	0.144736842105263	DepMap	GRCh37
1:6257785	RPL22	protein_coding	10:111893350	ADD3	protein_coding	Colon Colorectal Cancer	10	76	0.131578947368421	DepMap	GRCh37
2:148683686	ACVR2A	protein_coding	2:203420130	BMPR2	protein_coding	Colon Colorectal Cancer	10	76	0.131578947368421	DepMap	GRCh37
2:148683686	ACVR2A	protein_coding	11:32637520	CCDC73	protein_coding	Colon Colorectal Cancer	10	76	0.131578947368421	DepMap	GRCh37
20:47858504	DDX27	protein_coding	1:200594042	DDX59	protein_coding	Colon Colorectal Cancer	10	76	0.131578947368421	DepMap	GRCh37
8:95686611	ESRP1	protein_coding	1:200594042	DDX59	protein_coding	Colon Colorectal Cancer	10	76	0.131578947368421	DepMap	GRCh37
1:6257785	RPL22	protein_coding	3:51417604	DOCK3	protein_coding	Colon Colorectal Cancer	10	76	0.131578947368421	DepMap	GRCh37
2:148683686	ACVR2A	protein_coding	3:51417604	DOCK3	protein_coding	Colon Colorectal Cancer	10	76	0.131578947368421	DepMap	GRCh37
1:6257785	RPL22	protein_coding	1:204228411	PLEKHA6	protein_coding	Colon Colorectal Cancer	10	76	0.131578947368421	DepMap	GRCh37
11:32637520	CCDC73	protein_coding	1:6257785	RPL22	protein_coding	Colon Colorectal Cancer	10	76	0.131578947368421	DepMap	GRCh37
2:203420130	BMPR2	protein_coding	1:6257785	RPL22	protein_coding	Colon Colorectal Cancer	10	76	0.131578947368421	DepMap	GRCh37
1:161642774	FCGR2B	protein_coding	17:7809271	CHD3	protein_coding	THCA-CN	6	50	0.12	ICGC	GRCh37
1:161642774	FCGR2B	protein_coding	2:230914604	SLC16A14	protein_coding	THCA-CN	6	50	0.12	ICGC	GRCh37
1:161642774	FCGR2B	protein_coding	3:102181200	ZPLD1	protein_coding	THCA-CN	6	50	0.12	ICGC	GRCh37
1:200594042	DDX59	protein_coding	10:111893350	ADD3	protein_coding	Colon Colorectal Cancer	9	76	0.118421052631579	DepMap	GRCh37
1:24078404	TCEB3	NA	20:47858504	DDX27	protein_coding	Colon Colorectal Cancer	9	76	0.118421052631579	DepMap	GRCh37
1:24078404	TCEB3	NA	1:200594042	DDX59	protein_coding	Colon Colorectal Cancer	9	76	0.118421052631579	DepMap	GRCh37
1:24078404	TCEB3	NA	8:95686611	ESRP1	protein_coding	Colon Colorectal Cancer	9	76	0.118421052631579	DepMap	GRCh37
17:39724451	KRT9	protein_coding	2:152128240	NMI	protein_coding	Colon Colorectal Cancer	9	76	0.118421052631579	DepMap	GRCh37
1:6257785	RPL22	protein_coding	17:56435161	RNF43	protein_coding	Colon Colorectal Cancer	9	76	0.118421052631579	DepMap	GRCh37
1:6257785	RPL22	protein_coding	7:100479332	SRRT	protein_coding	Colon Colorectal Cancer	9	76	0.118421052631579	DepMap	GRCh37
1:6257785	RPL22	protein_coding	8:103289349	UBR5	protein_coding	Colon Colorectal Cancer	9	76	0.118421052631579	DepMap	GRCh37
2:148683686	ACVR2A	protein_coding	17:48433967	XYLT2	protein_coding	Colon Colorectal Cancer	9	76	0.118421052631579	DepMap	GRCh37
20:47858504	DDX27	protein_coding	10:111893350	ADD3	protein_coding	Colon Colorectal Cancer	8	76	0.105263157894737	DepMap	GRCh37
2:148683686	ACVR2A	protein_coding	7:100802405	AP1S1	protein_coding	Colon Colorectal Cancer	8	76	0.105263157894737	DepMap	GRCh37
1:6257785	RPL22	protein_coding	7:100802405	AP1S1	protein_coding	Colon Colorectal Cancer	8	76	0.105263157894737	DepMap	GRCh37
8:95686611	ESRP1	protein_coding	20:47858504	DDX27	protein_coding	Colon Colorectal Cancer	8	76	0.105263157894737	DepMap	GRCh37
11:32637520	CCDC73	protein_coding	20:47858504	DDX27	protein_coding	Colon Colorectal Cancer	8	76	0.105263157894737	DepMap	GRCh37
11:32637520	CCDC73	protein_coding	1:200594042	DDX59	protein_coding	Colon Colorectal Cancer	8	76	0.105263157894737	DepMap	GRCh37
3:51417604	DOCK3	protein_coding	1:200594042	DDX59	protein_coding	Colon Colorectal Cancer	8	76	0.105263157894737	DepMap	GRCh37
2:203420130	BMPR2	protein_coding	3:51417604	DOCK3	protein_coding	Colon Colorectal Cancer	8	76	0.105263157894737	DepMap	GRCh37
1:200594042	DDX59	protein_coding	16:4862228	GLYR1	protein_coding	Colon Colorectal Cancer	8	76	0.105263157894737	DepMap	GRCh37
1:6257785	RPL22	protein_coding	16:4862228	GLYR1	protein_coding	Colon Colorectal Cancer	8	76	0.105263157894737	DepMap	GRCh37
1:223176250	DISP1	protein_coding	17:39724451	KRT9	protein_coding	Colon Colorectal Cancer	8	76	0.105263157894737	DepMap	GRCh37
1:6257785	RPL22	protein_coding	12:57422573	MYO1A	protein_coding	Colon Colorectal Cancer	8	76	0.105263157894737	DepMap	GRCh37
1:223176250	DISP1	protein_coding	2:152128240	NMI	protein_coding	Colon Colorectal Cancer	8	76	0.105263157894737	DepMap	GRCh37
1:6257785	RPL22	protein_coding	11:4703475	OR51E2	protein_coding	Colon Colorectal Cancer	8	76	0.105263157894737	DepMap	GRCh37
17:39724451	KRT9	protein_coding	7:11022323	PHF14	protein_coding	Colon Colorectal Cancer	8	76	0.105263157894737	DepMap	GRCh37
2:152128240	NMI	protein_coding	7:11022323	PHF14	protein_coding	Colon Colorectal Cancer	8	76	0.105263157894737	DepMap	GRCh37
2:148683686	ACVR2A	protein_coding	1:204228411	PLEKHA6	protein_coding	Colon Colorectal Cancer	8	76	0.105263157894737	DepMap	GRCh37
10:28233229	ARMC4	protein_coding	16:67683416	RLTPR	NA	Colon Colorectal Cancer	8	76	0.105263157894737	DepMap	GRCh37
1:200594042	DDX59	protein_coding	17:56435161	RNF43	protein_coding	Colon Colorectal Cancer	8	76	0.105263157894737	DepMap	GRCh37
2:148683686	ACVR2A	protein_coding	17:56435161	RNF43	protein_coding	Colon Colorectal Cancer	8	76	0.105263157894737	DepMap	GRCh37
1:6257785	RPL22	protein_coding	12:48458896	SENP1	protein_coding	Colon Colorectal Cancer	8	76	0.105263157894737	DepMap	GRCh37
1:200594042	DDX59	protein_coding	7:100479332	SRRT	protein_coding	Colon Colorectal Cancer	8	76	0.105263157894737	DepMap	GRCh37
11:32637520	CCDC73	protein_coding	1:24078404	TCEB3	NA	Colon Colorectal Cancer	8	76	0.105263157894737	DepMap	GRCh37
2:148683686	ACVR2A	protein_coding	19:49850473	TEAD2	protein_coding	Colon Colorectal Cancer	8	76	0.105263157894737	DepMap	GRCh37
1:6257785	RPL22	protein_coding	19:49850473	TEAD2	protein_coding	Colon Colorectal Cancer	8	76	0.105263157894737	DepMap	GRCh37
1:6257785	RPL22	protein_coding	10:98336475	TM9SF3	protein_coding	Colon Colorectal Cancer	8	76	0.105263157894737	DepMap	GRCh37
1:200594042	DDX59	protein_coding	8:103289349	UBR5	protein_coding	Colon Colorectal Cancer	8	76	0.105263157894737	DepMap	GRCh37
2:148683686	ACVR2A	protein_coding	8:103289349	UBR5	protein_coding	Colon Colorectal Cancer	8	76	0.105263157894737	DepMap	GRCh37
1:200594042	DDX59	protein_coding	17:48433967	XYLT2	protein_coding	Colon Colorectal Cancer	8	76	0.105263157894737	DepMap	GRCh37
11:32637520	CCDC73	protein_coding	17:48433967	XYLT2	protein_coding	Colon Colorectal Cancer	8	76	0.105263157894737	DepMap	GRCh37
5:36985083	NIPBL	protein_coding	17:48433967	XYLT2	protein_coding	Colon Colorectal Cancer	8	76	0.105263157894737	DepMap	GRCh37
1:6257785	RPL22	protein_coding	10:64159513	ZNF365	protein_coding	Colon Colorectal Cancer	8	76	0.105263157894737	DepMap	GRCh37
1:16894523	NBPF1	protein_coding	7:140453136	BRAF	protein_coding	THCA-CN	5	50	0.1	ICGC	GRCh37
6:10410472	TFAP2A	protein_coding	7:140453136	BRAF	protein_coding	THCA-CN	5	50	0.1	ICGC	GRCh37
3:195507324	MUC4	protein_coding	7:140453136	BRAF	protein_coding	THCA-CN	5	50	0.1	ICGC	GRCh37
10:88476170	LDB3	protein_coding	7:140453136	BRAF	protein_coding	THCA-CN	5	50	0.1	ICGC	GRCh37
15:65678318	IGDCC4	protein_coding	7:140453136	BRAF	protein_coding	THCA-CN	5	50	0.1	ICGC	GRCh37
1:161642774	FCGR2B	protein_coding	17:48692787	CACNA1G	protein_coding	THCA-CN	5	50	0.1	ICGC	GRCh37
7:140453136	BRAF	protein_coding	9:70177269	FOXD4L5	protein_coding	THCA-CN	5	50	0.1	ICGC	GRCh37
1:161642774	FCGR2B	protein_coding	7:20198700	MACC1	protein_coding	THCA-CN	5	50	0.1	ICGC	GRCh37
2:230914604	SLC16A14	protein_coding	6:83892687	PGM3	protein_coding	THCA-CN	5	50	0.1	ICGC	GRCh37
19:10935797	DNM2	protein_coding	2:230914604	SLC16A14	protein_coding	THCA-CN	5	50	0.1	ICGC	GRCh37
1:161642774	FCGR2B	protein_coding	6:150263287	ULBP2	protein_coding	THCA-CN	5	50	0.1	ICGC	GRCh37
3:184104344	CHRD	protein_coding	6:150263287	ULBP2	protein_coding	THCA-CN	5	50	0.1	ICGC	GRCh37
3:102181200	ZPLD1	protein_coding	6:150263287	ULBP2	protein_coding	THCA-CN	5	50	0.1	ICGC	GRCh37
7:140453136	BRAF	protein_coding	8:17014282	ZDHHC2	protein_coding	THCA-CN	5	50	0.1	ICGC	GRCh37
2:148683686	ACVR2A	protein_coding	10:111893350	ADD3	protein_coding	Colon Colorectal Cancer	7	76	0.0921052631578947	DepMap	GRCh37
11:32637520	CCDC73	protein_coding	10:111893350	ADD3	protein_coding	Colon Colorectal Cancer	7	76	0.0921052631578947	DepMap	GRCh37
1:24078404	TCEB3	NA	7:100802405	AP1S1	protein_coding	Colon Colorectal Cancer	7	76	0.0921052631578947	DepMap	GRCh37
1:223176250	DISP1	protein_coding	10:28233229	ARMC4	protein_coding	Colon Colorectal Cancer	7	76	0.0921052631578947	DepMap	GRCh37
1:6257785	RPL22	protein_coding	6:139097330	CCDC28A	protein_coding	Colon Colorectal Cancer	7	76	0.0921052631578947	DepMap	GRCh37
1:24078404	TCEB3	NA	6:139097330	CCDC28A	protein_coding	Colon Colorectal Cancer	7	76	0.0921052631578947	DepMap	GRCh37
7:100802405	AP1S1	protein_coding	20:47858504	DDX27	protein_coding	Colon Colorectal Cancer	7	76	0.0921052631578947	DepMap	GRCh37
5:36985083	NIPBL	protein_coding	1:200594042	DDX59	protein_coding	Colon Colorectal Cancer	7	76	0.0921052631578947	DepMap	GRCh37
12:48458896	SENP1	protein_coding	1:200594042	DDX59	protein_coding	Colon Colorectal Cancer	7	76	0.0921052631578947	DepMap	GRCh37
20:47858504	DDX27	protein_coding	3:51417604	DOCK3	protein_coding	Colon Colorectal Cancer	7	76	0.0921052631578947	DepMap	GRCh37
1:24078404	TCEB3	NA	3:51417604	DOCK3	protein_coding	Colon Colorectal Cancer	7	76	0.0921052631578947	DepMap	GRCh37
8:95686611	ESRP1	protein_coding	3:51417604	DOCK3	protein_coding	Colon Colorectal Cancer	7	76	0.0921052631578947	DepMap	GRCh37
5:36985083	NIPBL	protein_coding	8:95686611	ESRP1	protein_coding	Colon Colorectal Cancer	7	76	0.0921052631578947	DepMap	GRCh37
11:32637520	CCDC73	protein_coding	8:95686611	ESRP1	protein_coding	Colon Colorectal Cancer	7	76	0.0921052631578947	DepMap	GRCh37
16:67683416	RLTPR	NA	17:39724451	KRT9	protein_coding	Colon Colorectal Cancer	7	76	0.0921052631578947	DepMap	GRCh37
11:43471750	TTC17	protein_coding	17:39724451	KRT9	protein_coding	Colon Colorectal Cancer	7	76	0.0921052631578947	DepMap	GRCh37
10:28233229	ARMC4	protein_coding	17:39724451	KRT9	protein_coding	Colon Colorectal Cancer	7	76	0.0921052631578947	DepMap	GRCh37
1:200594042	DDX59	protein_coding	12:57422573	MYO1A	protein_coding	Colon Colorectal Cancer	7	76	0.0921052631578947	DepMap	GRCh37
1:204228411	PLEKHA6	protein_coding	5:36985083	NIPBL	protein_coding	Colon Colorectal Cancer	7	76	0.0921052631578947	DepMap	GRCh37
11:32637520	CCDC73	protein_coding	5:36985083	NIPBL	protein_coding	Colon Colorectal Cancer	7	76	0.0921052631578947	DepMap	GRCh37
1:24078404	TCEB3	NA	5:36985083	NIPBL	protein_coding	Colon Colorectal Cancer	7	76	0.0921052631578947	DepMap	GRCh37
2:148683686	ACVR2A	protein_coding	11:4703475	OR51E2	protein_coding	Colon Colorectal Cancer	7	76	0.0921052631578947	DepMap	GRCh37
1:200594042	DDX59	protein_coding	11:4703475	OR51E2	protein_coding	Colon Colorectal Cancer	7	76	0.0921052631578947	DepMap	GRCh37
11:43471750	TTC17	protein_coding	7:11022323	PHF14	protein_coding	Colon Colorectal Cancer	7	76	0.0921052631578947	DepMap	GRCh37
10:28233229	ARMC4	protein_coding	7:11022323	PHF14	protein_coding	Colon Colorectal Cancer	7	76	0.0921052631578947	DepMap	GRCh37
1:223176250	DISP1	protein_coding	16:67683416	RLTPR	NA	Colon Colorectal Cancer	7	76	0.0921052631578947	DepMap	GRCh37
2:148683686	ACVR2A	protein_coding	12:48458896	SENP1	protein_coding	Colon Colorectal Cancer	7	76	0.0921052631578947	DepMap	GRCh37
1:24078404	TCEB3	NA	12:48458896	SENP1	protein_coding	Colon Colorectal Cancer	7	76	0.0921052631578947	DepMap	GRCh37
8:95686611	ESRP1	protein_coding	12:48458896	SENP1	protein_coding	Colon Colorectal Cancer	7	76	0.0921052631578947	DepMap	GRCh37
2:148683686	ACVR2A	protein_coding	7:100479332	SRRT	protein_coding	Colon Colorectal Cancer	7	76	0.0921052631578947	DepMap	GRCh37
10:111893350	ADD3	protein_coding	7:100479332	SRRT	protein_coding	Colon Colorectal Cancer	7	76	0.0921052631578947	DepMap	GRCh37
2:203420130	BMPR2	protein_coding	1:24078404	TCEB3	NA	Colon Colorectal Cancer	7	76	0.0921052631578947	DepMap	GRCh37
1:6257785	RPL22	protein_coding	10:114925317	TCF7L2	protein_coding	Colon Colorectal Cancer	7	76	0.0921052631578947	DepMap	GRCh37
2:203420130	BMPR2	protein_coding	10:114925317	TCF7L2	protein_coding	Colon Colorectal Cancer	7	76	0.0921052631578947	DepMap	GRCh37
17:48433967	XYLT2	protein_coding	19:49850473	TEAD2	protein_coding	Colon Colorectal Cancer	7	76	0.0921052631578947	DepMap	GRCh37
11:32637520	CCDC73	protein_coding	19:49850473	TEAD2	protein_coding	Colon Colorectal Cancer	7	76	0.0921052631578947	DepMap	GRCh37
5:36985083	NIPBL	protein_coding	19:49850473	TEAD2	protein_coding	Colon Colorectal Cancer	7	76	0.0921052631578947	DepMap	GRCh37
2:148683686	ACVR2A	protein_coding	10:98336475	TM9SF3	protein_coding	Colon Colorectal Cancer	7	76	0.0921052631578947	DepMap	GRCh37
1:200594042	DDX59	protein_coding	10:98336475	TM9SF3	protein_coding	Colon Colorectal Cancer	7	76	0.0921052631578947	DepMap	GRCh37
10:28233229	ARMC4	protein_coding	11:43471750	TTC17	protein_coding	Colon Colorectal Cancer	7	76	0.0921052631578947	DepMap	GRCh37
20:47858504	DDX27	protein_coding	8:103289349	UBR5	protein_coding	Colon Colorectal Cancer	7	76	0.0921052631578947	DepMap	GRCh37
10:64159513	ZNF365	protein_coding	8:103289349	UBR5	protein_coding	Colon Colorectal Cancer	7	76	0.0921052631578947	DepMap	GRCh37
1:6257785	RPL22	protein_coding	1:27621108	WDTC1	protein_coding	Colon Colorectal Cancer	7	76	0.0921052631578947	DepMap	GRCh37
1:24078404	TCEB3	NA	17:48433967	XYLT2	protein_coding	Colon Colorectal Cancer	7	76	0.0921052631578947	DepMap	GRCh37
2:148683686	ACVR2A	protein_coding	10:64159513	ZNF365	protein_coding	Colon Colorectal Cancer	7	76	0.0921052631578947	DepMap	GRCh37
20:47858504	DDX27	protein_coding	10:64159513	ZNF365	protein_coding	Colon Colorectal Cancer	7	76	0.0921052631578947	DepMap	GRCh37
1:200594042	DDX59	protein_coding	10:64159513	ZNF365	protein_coding	Colon Colorectal Cancer	7	76	0.0921052631578947	DepMap	GRCh37
4:190876256	FRG1	protein_coding	4:190876278	FRG1	protein_coding	COCA-CN	28	305	0.0918032786885246	ICGC	GRCh37
1:155580061	MSTO1	protein_coding	7:140453136	BRAF	protein_coding	THCA-CN	4	50	0.08	ICGC	GRCh37
2:230914604	SLC16A14	protein_coding	7:140453136	BRAF	protein_coding	THCA-CN	4	50	0.08	ICGC	GRCh37
16:67876755	NUTF2	protein_coding	7:140453136	BRAF	protein_coding	THCA-CN	4	50	0.08	ICGC	GRCh37
6:10410466	TFAP2A	protein_coding	7:140453136	BRAF	protein_coding	THCA-CN	4	50	0.08	ICGC	GRCh37
2:233271799	ALPG	protein_coding	7:140453136	BRAF	protein_coding	THCA-CN	4	50	0.08	ICGC	GRCh37
2:220422605	OBSL1	protein_coding	7:140453136	BRAF	protein_coding	THCA-CN	4	50	0.08	ICGC	GRCh37
19:10935797	DNM2	protein_coding	7:140453136	BRAF	protein_coding	THCA-CN	4	50	0.08	ICGC	GRCh37
11:114421857	NXPE1	protein_coding	7:140453136	BRAF	protein_coding	THCA-CN	4	50	0.08	ICGC	GRCh37
17:7386234	ZBTB4	protein_coding	7:140453136	BRAF	protein_coding	THCA-CN	4	50	0.08	ICGC	GRCh37
3:75714807	DUX4L26	none protein_coding	7:140453136	BRAF	protein_coding	THCA-CN	4	50	0.08	ICGC	GRCh37
19:42596335	POU2F2	protein_coding	7:140453136	BRAF	protein_coding	THCA-CN	4	50	0.08	ICGC	GRCh37
22:50617600	PANX2	protein_coding	7:140453136	BRAF	protein_coding	THCA-CN	4	50	0.08	ICGC	GRCh37
17:21207813	MAP2K3	protein_coding	7:140453136	BRAF	protein_coding	THCA-CN	4	50	0.08	ICGC	GRCh37
2:230914604	SLC16A14	protein_coding	22:40066873	CACNA1I	protein_coding	THCA-CN	4	50	0.08	ICGC	GRCh37
17:48692787	CACNA1G	protein_coding	17:7809271	CHD3	protein_coding	THCA-CN	4	50	0.08	ICGC	GRCh37
1:29557390	MECR	protein_coding	5:10761137	DAP	protein_coding	THCA-CN	4	50	0.08	ICGC	GRCh37
15:65678318	IGDCC4	protein_coding	16:776315	HAGHL	protein_coding	THCA-CN	4	50	0.08	ICGC	GRCh37
1:29557390	MECR	protein_coding	19:2248265	JSRP1	protein_coding	THCA-CN	4	50	0.08	ICGC	GRCh37
1:29557390	MECR	protein_coding	7:20198700	MACC1	protein_coding	THCA-CN	4	50	0.08	ICGC	GRCh37
2:230914604	SLC16A14	protein_coding	7:20198700	MACC1	protein_coding	THCA-CN	4	50	0.08	ICGC	GRCh37
17:7809271	CHD3	protein_coding	7:20198700	MACC1	protein_coding	THCA-CN	4	50	0.08	ICGC	GRCh37
6:150263287	ULBP2	protein_coding	7:20198700	MACC1	protein_coding	THCA-CN	4	50	0.08	ICGC	GRCh37
6:83892687	PGM3	protein_coding	7:20198700	MACC1	protein_coding	THCA-CN	4	50	0.08	ICGC	GRCh37
3:184104344	CHRD	protein_coding	5:71490955	MAP1B	protein_coding	THCA-CN	4	50	0.08	ICGC	GRCh37
1:16894523	NBPF1	protein_coding	17:21207813	MAP2K3	protein_coding	THCA-CN	4	50	0.08	ICGC	GRCh37
1:161642774	FCGR2B	protein_coding	1:29557390	MECR	protein_coding	THCA-CN	4	50	0.08	ICGC	GRCh37
7:140453136	BRAF	protein_coding	7:73011743	MLXIPL	protein_coding	THCA-CN	4	50	0.08	ICGC	GRCh37
7:140453136	BRAF	protein_coding	8:101730073	PABPC1	protein_coding	THCA-CN	4	50	0.08	ICGC	GRCh37
1:161642774	FCGR2B	protein_coding	6:83892687	PGM3	protein_coding	THCA-CN	4	50	0.08	ICGC	GRCh37
22:40066873	CACNA1I	protein_coding	6:83892687	PGM3	protein_coding	THCA-CN	4	50	0.08	ICGC	GRCh37
17:7809271	CHD3	protein_coding	2:230914604	SLC16A14	protein_coding	THCA-CN	4	50	0.08	ICGC	GRCh37
17:48692787	CACNA1G	protein_coding	2:230914604	SLC16A14	protein_coding	THCA-CN	4	50	0.08	ICGC	GRCh37
1:29557390	MECR	protein_coding	2:230914604	SLC16A14	protein_coding	THCA-CN	4	50	0.08	ICGC	GRCh37
19:2248265	JSRP1	protein_coding	6:10410466	TFAP2A	protein_coding	THCA-CN	4	50	0.08	ICGC	GRCh37
2:230914604	SLC16A14	protein_coding	6:150263287	ULBP2	protein_coding	THCA-CN	4	50	0.08	ICGC	GRCh37
16:776315	HAGHL	protein_coding	6:150263287	ULBP2	protein_coding	THCA-CN	4	50	0.08	ICGC	GRCh37
20:18477732	RBBP9	protein_coding	6:150263287	ULBP2	protein_coding	THCA-CN	4	50	0.08	ICGC	GRCh37
5:71490955	MAP1B	protein_coding	6:150263287	ULBP2	protein_coding	THCA-CN	4	50	0.08	ICGC	GRCh37
6:150263287	ULBP2	protein_coding	9:96055149	WNK2	protein_coding	THCA-CN	4	50	0.08	ICGC	GRCh37
6:10410472	TFAP2A	protein_coding	8:17014282	ZDHHC2	protein_coding	THCA-CN	4	50	0.08	ICGC	GRCh37
11:64032516	PLCB3	protein_coding	8:17014282	ZDHHC2	protein_coding	THCA-CN	4	50	0.08	ICGC	GRCh37
17:38975319	TMEM99	none protein_coding	8:17014282	ZDHHC2	protein_coding	THCA-CN	4	50	0.08	ICGC	GRCh37
17:7809271	CHD3	protein_coding	3:102181200	ZPLD1	protein_coding	THCA-CN	4	50	0.08	ICGC	GRCh37
17:48692787	CACNA1G	protein_coding	3:102181200	ZPLD1	protein_coding	THCA-CN	4	50	0.08	ICGC	GRCh37
2:230914604	SLC16A14	protein_coding	3:102181200	ZPLD1	protein_coding	THCA-CN	4	50	0.08	ICGC	GRCh37
12:25398284	KRAS	protein_coding	2:148683686	ACVR2A	protein_coding	Colon Colorectal Cancer	6	76	0.0789473684210526	DepMap	GRCh37
1:24078404	TCEB3	NA	10:111893350	ADD3	protein_coding	Colon Colorectal Cancer	6	76	0.0789473684210526	DepMap	GRCh37
17:48433967	XYLT2	protein_coding	10:111893350	ADD3	protein_coding	Colon Colorectal Cancer	6	76	0.0789473684210526	DepMap	GRCh37
7:100802405	AP1S1	protein_coding	10:111893350	ADD3	protein_coding	Colon Colorectal Cancer	6	76	0.0789473684210526	DepMap	GRCh37
8:103289349	UBR5	protein_coding	10:111893350	ADD3	protein_coding	Colon Colorectal Cancer	6	76	0.0789473684210526	DepMap	GRCh37
6:139097330	CCDC28A	protein_coding	7:100802405	AP1S1	protein_coding	Colon Colorectal Cancer	6	76	0.0789473684210526	DepMap	GRCh37
11:32637520	CCDC73	protein_coding	7:100802405	AP1S1	protein_coding	Colon Colorectal Cancer	6	76	0.0789473684210526	DepMap	GRCh37
7:140453136	BRAF	protein_coding	5:112175951	APC	protein_coding	Colon Colorectal Cancer	6	76	0.0789473684210526	DepMap	GRCh37
11:32637520	CCDC73	protein_coding	2:203420130	BMPR2	protein_coding	Colon Colorectal Cancer	6	76	0.0789473684210526	DepMap	GRCh37
2:148683686	ACVR2A	protein_coding	6:139097330	CCDC28A	protein_coding	Colon Colorectal Cancer	6	76	0.0789473684210526	DepMap	GRCh37
12:48458896	SENP1	protein_coding	20:47858504	DDX27	protein_coding	Colon Colorectal Cancer	6	76	0.0789473684210526	DepMap	GRCh37
2:203420130	BMPR2	protein_coding	20:47858504	DDX27	protein_coding	Colon Colorectal Cancer	6	76	0.0789473684210526	DepMap	GRCh37
6:139097330	CCDC28A	protein_coding	1:200594042	DDX59	protein_coding	Colon Colorectal Cancer	6	76	0.0789473684210526	DepMap	GRCh37
7:100802405	AP1S1	protein_coding	1:200594042	DDX59	protein_coding	Colon Colorectal Cancer	6	76	0.0789473684210526	DepMap	GRCh37
2:203420130	BMPR2	protein_coding	1:200594042	DDX59	protein_coding	Colon Colorectal Cancer	6	76	0.0789473684210526	DepMap	GRCh37
6:139097330	CCDC28A	protein_coding	3:51417604	DOCK3	protein_coding	Colon Colorectal Cancer	6	76	0.0789473684210526	DepMap	GRCh37
2:203420130	BMPR2	protein_coding	8:95686611	ESRP1	protein_coding	Colon Colorectal Cancer	6	76	0.0789473684210526	DepMap	GRCh37
10:114925317	TCF7L2	protein_coding	8:95686611	ESRP1	protein_coding	Colon Colorectal Cancer	6	76	0.0789473684210526	DepMap	GRCh37
6:139097330	CCDC28A	protein_coding	8:95686611	ESRP1	protein_coding	Colon Colorectal Cancer	6	76	0.0789473684210526	DepMap	GRCh37
2:148683686	ACVR2A	protein_coding	16:4862228	GLYR1	protein_coding	Colon Colorectal Cancer	6	76	0.0789473684210526	DepMap	GRCh37
17:56435161	RNF43	protein_coding	12:57422573	MYO1A	protein_coding	Colon Colorectal Cancer	6	76	0.0789473684210526	DepMap	GRCh37
17:48433967	XYLT2	protein_coding	12:57422573	MYO1A	protein_coding	Colon Colorectal Cancer	6	76	0.0789473684210526	DepMap	GRCh37
2:148683686	ACVR2A	protein_coding	12:57422573	MYO1A	protein_coding	Colon Colorectal Cancer	6	76	0.0789473684210526	DepMap	GRCh37
10:28233229	ARMC4	protein_coding	2:152128240	NMI	protein_coding	Colon Colorectal Cancer	6	76	0.0789473684210526	DepMap	GRCh37
11:43471750	TTC17	protein_coding	2:152128240	NMI	protein_coding	Colon Colorectal Cancer	6	76	0.0789473684210526	DepMap	GRCh37
16:67683416	RLTPR	NA	2:152128240	NMI	protein_coding	Colon Colorectal Cancer	6	76	0.0789473684210526	DepMap	GRCh37
5:36985083	NIPBL	protein_coding	11:4703475	OR51E2	protein_coding	Colon Colorectal Cancer	6	76	0.0789473684210526	DepMap	GRCh37
1:223176250	DISP1	protein_coding	7:11022323	PHF14	protein_coding	Colon Colorectal Cancer	6	76	0.0789473684210526	DepMap	GRCh37
16:67683416	RLTPR	NA	7:11022323	PHF14	protein_coding	Colon Colorectal Cancer	6	76	0.0789473684210526	DepMap	GRCh37
21:37653892	DOPEY2	NA	7:11022323	PHF14	protein_coding	Colon Colorectal Cancer	6	76	0.0789473684210526	DepMap	GRCh37
2:203420130	BMPR2	protein_coding	1:204228411	PLEKHA6	protein_coding	Colon Colorectal Cancer	6	76	0.0789473684210526	DepMap	GRCh37
11:43471750	TTC17	protein_coding	16:67683416	RLTPR	NA	Colon Colorectal Cancer	6	76	0.0789473684210526	DepMap	GRCh37
12:25398284	KRAS	protein_coding	1:6257785	RPL22	protein_coding	Colon Colorectal Cancer	6	76	0.0789473684210526	DepMap	GRCh37
5:36985083	NIPBL	protein_coding	7:100479332	SRRT	protein_coding	Colon Colorectal Cancer	6	76	0.0789473684210526	DepMap	GRCh37
8:95686611	ESRP1	protein_coding	7:100479332	SRRT	protein_coding	Colon Colorectal Cancer	6	76	0.0789473684210526	DepMap	GRCh37
1:204228411	PLEKHA6	protein_coding	7:100479332	SRRT	protein_coding	Colon Colorectal Cancer	6	76	0.0789473684210526	DepMap	GRCh37
16:4862228	GLYR1	protein_coding	7:100479332	SRRT	protein_coding	Colon Colorectal Cancer	6	76	0.0789473684210526	DepMap	GRCh37
12:25398284	KRAS	protein_coding	1:24078404	TCEB3	NA	Colon Colorectal Cancer	6	76	0.0789473684210526	DepMap	GRCh37
2:148683686	ACVR2A	protein_coding	10:114925317	TCF7L2	protein_coding	Colon Colorectal Cancer	6	76	0.0789473684210526	DepMap	GRCh37
1:24078404	TCEB3	NA	19:49850473	TEAD2	protein_coding	Colon Colorectal Cancer	6	76	0.0789473684210526	DepMap	GRCh37
11:32637520	CCDC73	protein_coding	10:98336475	TM9SF3	protein_coding	Colon Colorectal Cancer	6	76	0.0789473684210526	DepMap	GRCh37
17:48433967	XYLT2	protein_coding	10:98336475	TM9SF3	protein_coding	Colon Colorectal Cancer	6	76	0.0789473684210526	DepMap	GRCh37
1:24078404	TCEB3	NA	10:98336475	TM9SF3	protein_coding	Colon Colorectal Cancer	6	76	0.0789473684210526	DepMap	GRCh37
20:47858504	DDX27	protein_coding	10:98336475	TM9SF3	protein_coding	Colon Colorectal Cancer	6	76	0.0789473684210526	DepMap	GRCh37
19:49850473	TEAD2	protein_coding	10:98336475	TM9SF3	protein_coding	Colon Colorectal Cancer	6	76	0.0789473684210526	DepMap	GRCh37
10:111893350	ADD3	protein_coding	10:98336475	TM9SF3	protein_coding	Colon Colorectal Cancer	6	76	0.0789473684210526	DepMap	GRCh37
7:100802405	AP1S1	protein_coding	10:98336475	TM9SF3	protein_coding	Colon Colorectal Cancer	6	76	0.0789473684210526	DepMap	GRCh37
2:148683686	ACVR2A	protein_coding	1:27621108	WDTC1	protein_coding	Colon Colorectal Cancer	6	76	0.0789473684210526	DepMap	GRCh37
2:203420130	BMPR2	protein_coding	1:27621108	WDTC1	protein_coding	Colon Colorectal Cancer	6	76	0.0789473684210526	DepMap	GRCh37
10:64159513	ZNF365	protein_coding	17:48433967	XYLT2	protein_coding	Colon Colorectal Cancer	6	76	0.0789473684210526	DepMap	GRCh37
20:47858504	DDX27	protein_coding	17:48433967	XYLT2	protein_coding	Colon Colorectal Cancer	6	76	0.0789473684210526	DepMap	GRCh37
2:120194651	TMEM37	protein_coding	X:114425216	LRCH2	protein_coding	LMS-FR	5	67	0.0746268656716418	ICGC	GRCh37
2:120194651	TMEM37	protein_coding	2:120194652	TMEM37	protein_coding	LMS-FR	5	67	0.0746268656716418	ICGC	GRCh37
2:203420130	BMPR2	protein_coding	10:111893350	ADD3	protein_coding	Colon Colorectal Cancer	5	76	0.0657894736842105	DepMap	GRCh37
8:95686611	ESRP1	protein_coding	10:111893350	ADD3	protein_coding	Colon Colorectal Cancer	5	76	0.0657894736842105	DepMap	GRCh37
10:64159513	ZNF365	protein_coding	10:111893350	ADD3	protein_coding	Colon Colorectal Cancer	5	76	0.0657894736842105	DepMap	GRCh37
16:4862228	GLYR1	protein_coding	10:111893350	ADD3	protein_coding	Colon Colorectal Cancer	5	76	0.0657894736842105	DepMap	GRCh37
19:49850473	TEAD2	protein_coding	10:111893350	ADD3	protein_coding	Colon Colorectal Cancer	5	76	0.0657894736842105	DepMap	GRCh37
5:36985083	NIPBL	protein_coding	10:111893350	ADD3	protein_coding	Colon Colorectal Cancer	5	76	0.0657894736842105	DepMap	GRCh37
5:36985083	NIPBL	protein_coding	7:100802405	AP1S1	protein_coding	Colon Colorectal Cancer	5	76	0.0657894736842105	DepMap	GRCh37
2:203420130	BMPR2	protein_coding	7:100802405	AP1S1	protein_coding	Colon Colorectal Cancer	5	76	0.0657894736842105	DepMap	GRCh37
11:32637520	CCDC73	protein_coding	6:139097330	CCDC28A	protein_coding	Colon Colorectal Cancer	5	76	0.0657894736842105	DepMap	GRCh37
2:203420130	BMPR2	protein_coding	6:139097330	CCDC28A	protein_coding	Colon Colorectal Cancer	5	76	0.0657894736842105	DepMap	GRCh37
6:139097330	CCDC28A	protein_coding	20:47858504	DDX27	protein_coding	Colon Colorectal Cancer	5	76	0.0657894736842105	DepMap	GRCh37
1:27621108	WDTC1	protein_coding	20:47858504	DDX27	protein_coding	Colon Colorectal Cancer	5	76	0.0657894736842105	DepMap	GRCh37
5:36985083	NIPBL	protein_coding	20:47858504	DDX27	protein_coding	Colon Colorectal Cancer	5	76	0.0657894736842105	DepMap	GRCh37
10:114925317	TCF7L2	protein_coding	20:47858504	DDX27	protein_coding	Colon Colorectal Cancer	5	76	0.0657894736842105	DepMap	GRCh37
1:204228411	PLEKHA6	protein_coding	1:200594042	DDX59	protein_coding	Colon Colorectal Cancer	5	76	0.0657894736842105	DepMap	GRCh37
1:27621108	WDTC1	protein_coding	1:200594042	DDX59	protein_coding	Colon Colorectal Cancer	5	76	0.0657894736842105	DepMap	GRCh37
11:32637520	CCDC73	protein_coding	3:51417604	DOCK3	protein_coding	Colon Colorectal Cancer	5	76	0.0657894736842105	DepMap	GRCh37
10:114925317	TCF7L2	protein_coding	3:51417604	DOCK3	protein_coding	Colon Colorectal Cancer	5	76	0.0657894736842105	DepMap	GRCh37
1:27621108	WDTC1	protein_coding	3:51417604	DOCK3	protein_coding	Colon Colorectal Cancer	5	76	0.0657894736842105	DepMap	GRCh37
12:48458896	SENP1	protein_coding	3:51417604	DOCK3	protein_coding	Colon Colorectal Cancer	5	76	0.0657894736842105	DepMap	GRCh37
11:43471750	TTC17	protein_coding	21:37653892	DOPEY2	NA	Colon Colorectal Cancer	5	76	0.0657894736842105	DepMap	GRCh37
2:152128240	NMI	protein_coding	21:37653892	DOPEY2	NA	Colon Colorectal Cancer	5	76	0.0657894736842105	DepMap	GRCh37
7:100802405	AP1S1	protein_coding	8:95686611	ESRP1	protein_coding	Colon Colorectal Cancer	5	76	0.0657894736842105	DepMap	GRCh37
12:25398284	KRAS	protein_coding	8:95686611	ESRP1	protein_coding	Colon Colorectal Cancer	5	76	0.0657894736842105	DepMap	GRCh37
1:204228411	PLEKHA6	protein_coding	8:95686611	ESRP1	protein_coding	Colon Colorectal Cancer	5	76	0.0657894736842105	DepMap	GRCh37
1:24078404	TCEB3	NA	16:4862228	GLYR1	protein_coding	Colon Colorectal Cancer	5	76	0.0657894736842105	DepMap	GRCh37
11:4703475	OR51E2	protein_coding	16:4862228	GLYR1	protein_coding	Colon Colorectal Cancer	5	76	0.0657894736842105	DepMap	GRCh37
5:36985083	NIPBL	protein_coding	16:4862228	GLYR1	protein_coding	Colon Colorectal Cancer	5	76	0.0657894736842105	DepMap	GRCh37
8:95686611	ESRP1	protein_coding	16:4862228	GLYR1	protein_coding	Colon Colorectal Cancer	5	76	0.0657894736842105	DepMap	GRCh37
1:204228411	PLEKHA6	protein_coding	16:4862228	GLYR1	protein_coding	Colon Colorectal Cancer	5	76	0.0657894736842105	DepMap	GRCh37
2:203420130	BMPR2	protein_coding	12:57422573	MYO1A	protein_coding	Colon Colorectal Cancer	5	76	0.0657894736842105	DepMap	GRCh37
11:32637520	CCDC73	protein_coding	12:57422573	MYO1A	protein_coding	Colon Colorectal Cancer	5	76	0.0657894736842105	DepMap	GRCh37
1:27621108	WDTC1	protein_coding	12:57422573	MYO1A	protein_coding	Colon Colorectal Cancer	5	76	0.0657894736842105	DepMap	GRCh37
3:51417604	DOCK3	protein_coding	12:57422573	MYO1A	protein_coding	Colon Colorectal Cancer	5	76	0.0657894736842105	DepMap	GRCh37
7:100802405	AP1S1	protein_coding	12:57422573	MYO1A	protein_coding	Colon Colorectal Cancer	5	76	0.0657894736842105	DepMap	GRCh37
10:98336475	TM9SF3	protein_coding	12:57422573	MYO1A	protein_coding	Colon Colorectal Cancer	5	76	0.0657894736842105	DepMap	GRCh37
10:111893350	ADD3	protein_coding	12:57422573	MYO1A	protein_coding	Colon Colorectal Cancer	5	76	0.0657894736842105	DepMap	GRCh37
16:4862228	GLYR1	protein_coding	12:57422573	MYO1A	protein_coding	Colon Colorectal Cancer	5	76	0.0657894736842105	DepMap	GRCh37
1:24078404	TCEB3	NA	11:4703475	OR51E2	protein_coding	Colon Colorectal Cancer	5	76	0.0657894736842105	DepMap	GRCh37
8:95686611	ESRP1	protein_coding	11:4703475	OR51E2	protein_coding	Colon Colorectal Cancer	5	76	0.0657894736842105	DepMap	GRCh37
1:24078404	TCEB3	NA	1:204228411	PLEKHA6	protein_coding	Colon Colorectal Cancer	5	76	0.0657894736842105	DepMap	GRCh37
17:48433967	XYLT2	protein_coding	17:56435161	RNF43	protein_coding	Colon Colorectal Cancer	5	76	0.0657894736842105	DepMap	GRCh37
3:51417604	DOCK3	protein_coding	17:56435161	RNF43	protein_coding	Colon Colorectal Cancer	5	76	0.0657894736842105	DepMap	GRCh37
8:95686611	ESRP1	protein_coding	17:56435161	RNF43	protein_coding	Colon Colorectal Cancer	5	76	0.0657894736842105	DepMap	GRCh37
6:139097330	CCDC28A	protein_coding	12:48458896	SENP1	protein_coding	Colon Colorectal Cancer	5	76	0.0657894736842105	DepMap	GRCh37
11:32637520	CCDC73	protein_coding	12:48458896	SENP1	protein_coding	Colon Colorectal Cancer	5	76	0.0657894736842105	DepMap	GRCh37
5:36985083	NIPBL	protein_coding	12:48458896	SENP1	protein_coding	Colon Colorectal Cancer	5	76	0.0657894736842105	DepMap	GRCh37
11:32637520	CCDC73	protein_coding	7:100479332	SRRT	protein_coding	Colon Colorectal Cancer	5	76	0.0657894736842105	DepMap	GRCh37
17:48433967	XYLT2	protein_coding	7:100479332	SRRT	protein_coding	Colon Colorectal Cancer	5	76	0.0657894736842105	DepMap	GRCh37
8:103289349	UBR5	protein_coding	7:100479332	SRRT	protein_coding	Colon Colorectal Cancer	5	76	0.0657894736842105	DepMap	GRCh37
20:47858504	DDX27	protein_coding	7:100479332	SRRT	protein_coding	Colon Colorectal Cancer	5	76	0.0657894736842105	DepMap	GRCh37
12:48458896	SENP1	protein_coding	7:100479332	SRRT	protein_coding	Colon Colorectal Cancer	5	76	0.0657894736842105	DepMap	GRCh37
1:24078404	TCEB3	NA	10:114925317	TCF7L2	protein_coding	Colon Colorectal Cancer	5	76	0.0657894736842105	DepMap	GRCh37
7:100802405	AP1S1	protein_coding	19:49850473	TEAD2	protein_coding	Colon Colorectal Cancer	5	76	0.0657894736842105	DepMap	GRCh37
3:51417604	DOCK3	protein_coding	19:49850473	TEAD2	protein_coding	Colon Colorectal Cancer	5	76	0.0657894736842105	DepMap	GRCh37
8:95686611	ESRP1	protein_coding	19:49850473	TEAD2	protein_coding	Colon Colorectal Cancer	5	76	0.0657894736842105	DepMap	GRCh37
20:47858504	DDX27	protein_coding	19:49850473	TEAD2	protein_coding	Colon Colorectal Cancer	5	76	0.0657894736842105	DepMap	GRCh37
1:200594042	DDX59	protein_coding	19:49850473	TEAD2	protein_coding	Colon Colorectal Cancer	5	76	0.0657894736842105	DepMap	GRCh37
8:95686611	ESRP1	protein_coding	10:98336475	TM9SF3	protein_coding	Colon Colorectal Cancer	5	76	0.0657894736842105	DepMap	GRCh37
3:51417604	DOCK3	protein_coding	10:98336475	TM9SF3	protein_coding	Colon Colorectal Cancer	5	76	0.0657894736842105	DepMap	GRCh37
6:139097330	CCDC28A	protein_coding	10:98336475	TM9SF3	protein_coding	Colon Colorectal Cancer	5	76	0.0657894736842105	DepMap	GRCh37
7:100479332	SRRT	protein_coding	10:98336475	TM9SF3	protein_coding	Colon Colorectal Cancer	5	76	0.0657894736842105	DepMap	GRCh37
2:203420130	BMPR2	protein_coding	10:98336475	TM9SF3	protein_coding	Colon Colorectal Cancer	5	76	0.0657894736842105	DepMap	GRCh37
12:48458896	SENP1	protein_coding	10:98336475	TM9SF3	protein_coding	Colon Colorectal Cancer	5	76	0.0657894736842105	DepMap	GRCh37
1:223176250	DISP1	protein_coding	11:43471750	TTC17	protein_coding	Colon Colorectal Cancer	5	76	0.0657894736842105	DepMap	GRCh37
5:36985083	NIPBL	protein_coding	8:103289349	UBR5	protein_coding	Colon Colorectal Cancer	5	76	0.0657894736842105	DepMap	GRCh37
8:95686611	ESRP1	protein_coding	8:103289349	UBR5	protein_coding	Colon Colorectal Cancer	5	76	0.0657894736842105	DepMap	GRCh37
11:32637520	CCDC73	protein_coding	8:103289349	UBR5	protein_coding	Colon Colorectal Cancer	5	76	0.0657894736842105	DepMap	GRCh37
1:27621108	WDTC1	protein_coding	8:103289349	UBR5	protein_coding	Colon Colorectal Cancer	5	76	0.0657894736842105	DepMap	GRCh37
10:114925317	TCF7L2	protein_coding	1:27621108	WDTC1	protein_coding	Colon Colorectal Cancer	5	76	0.0657894736842105	DepMap	GRCh37
8:103289349	UBR5	protein_coding	17:48433967	XYLT2	protein_coding	Colon Colorectal Cancer	5	76	0.0657894736842105	DepMap	GRCh37
3:51417604	DOCK3	protein_coding	17:48433967	XYLT2	protein_coding	Colon Colorectal Cancer	5	76	0.0657894736842105	DepMap	GRCh37
12:48458896	SENP1	protein_coding	17:48433967	XYLT2	protein_coding	Colon Colorectal Cancer	5	76	0.0657894736842105	DepMap	GRCh37
11:4703475	OR51E2	protein_coding	17:48433967	XYLT2	protein_coding	Colon Colorectal Cancer	5	76	0.0657894736842105	DepMap	GRCh37
8:95686611	ESRP1	protein_coding	17:48433967	XYLT2	protein_coding	Colon Colorectal Cancer	5	76	0.0657894736842105	DepMap	GRCh37
7:100802405	AP1S1	protein_coding	17:48433967	XYLT2	protein_coding	Colon Colorectal Cancer	5	76	0.0657894736842105	DepMap	GRCh37
1:204228411	PLEKHA6	protein_coding	17:48433967	XYLT2	protein_coding	Colon Colorectal Cancer	5	76	0.0657894736842105	DepMap	GRCh37
1:27621108	WDTC1	protein_coding	10:64159513	ZNF365	protein_coding	Colon Colorectal Cancer	5	76	0.0657894736842105	DepMap	GRCh37
5:36985083	NIPBL	protein_coding	10:64159513	ZNF365	protein_coding	Colon Colorectal Cancer	5	76	0.0657894736842105	DepMap	GRCh37
7:100802405	AP1S1	protein_coding	10:64159513	ZNF365	protein_coding	Colon Colorectal Cancer	5	76	0.0657894736842105	DepMap	GRCh37
1:24078404	TCEB3	NA	10:64159513	ZNF365	protein_coding	Colon Colorectal Cancer	5	76	0.0657894736842105	DepMap	GRCh37
11:32637520	CCDC73	protein_coding	10:64159513	ZNF365	protein_coding	Colon Colorectal Cancer	5	76	0.0657894736842105	DepMap	GRCh37
3:178952085	PIK3CA	protein_coding	21:31587621	CLDN8	protein_coding	Breast Cancer	4	63	0.0634920634920635	DepMap	GRCh37
2:197402759	SF3B1	protein_coding	9:77794572	GNAQ	protein_coding	TCGA_UVM.csv	5	80	0.0625	TCGA	GRCh38
11:114421857	NXPE1	protein_coding	2:233271799	ALPG	protein_coding	THCA-CN	3	50	0.06	ICGC	GRCh37
11:64032516	PLCB3	protein_coding	7:140453136	BRAF	protein_coding	THCA-CN	3	50	0.06	ICGC	GRCh37
1:16903882	NBPF1	protein_coding	7:140453136	BRAF	protein_coding	THCA-CN	3	50	0.06	ICGC	GRCh37
4:8869661	HMX1	protein_coding	7:140453136	BRAF	protein_coding	THCA-CN	3	50	0.06	ICGC	GRCh37
15:93198684	FAM174B	protein_coding	7:140453136	BRAF	protein_coding	THCA-CN	3	50	0.06	ICGC	GRCh37
1:201179068	IGFN1	protein_coding	7:140453136	BRAF	protein_coding	THCA-CN	3	50	0.06	ICGC	GRCh37
20:18477732	RBBP9	protein_coding	7:140453136	BRAF	protein_coding	THCA-CN	3	50	0.06	ICGC	GRCh37
17:7809271	CHD3	protein_coding	7:140453136	BRAF	protein_coding	THCA-CN	3	50	0.06	ICGC	GRCh37
1:161642774	FCGR2B	protein_coding	7:140453136	BRAF	protein_coding	THCA-CN	3	50	0.06	ICGC	GRCh37
19:2248265	JSRP1	protein_coding	7:140453136	BRAF	protein_coding	THCA-CN	3	50	0.06	ICGC	GRCh37
6:83892687	PGM3	protein_coding	7:140453136	BRAF	protein_coding	THCA-CN	3	50	0.06	ICGC	GRCh37
2:242011127	MTERF4	protein_coding	7:140453136	BRAF	protein_coding	THCA-CN	3	50	0.06	ICGC	GRCh37
1:27878416	AHDC1	protein_coding	7:140453136	BRAF	protein_coding	THCA-CN	3	50	0.06	ICGC	GRCh37
17:77111772	RBFOX3	protein_coding	7:140453136	BRAF	protein_coding	THCA-CN	3	50	0.06	ICGC	GRCh37
15:82336406	MEX3B	protein_coding	7:140453136	BRAF	protein_coding	THCA-CN	3	50	0.06	ICGC	GRCh37
12:50745822	FAM186A	protein_coding	7:140453136	BRAF	protein_coding	THCA-CN	3	50	0.06	ICGC	GRCh37
17:48692787	CACNA1G	protein_coding	7:140453136	BRAF	protein_coding	THCA-CN	3	50	0.06	ICGC	GRCh37
5:71490955	MAP1B	protein_coding	7:140453136	BRAF	protein_coding	THCA-CN	3	50	0.06	ICGC	GRCh37
16:29999266	TAOK2	protein_coding	7:140453136	BRAF	protein_coding	THCA-CN	3	50	0.06	ICGC	GRCh37
15:38776684	FAM98B	protein_coding	7:140453136	BRAF	protein_coding	THCA-CN	3	50	0.06	ICGC	GRCh37
6:127837125	SOGA3	protein_coding	7:140453136	BRAF	protein_coding	THCA-CN	3	50	0.06	ICGC	GRCh37
5:76332468	AGGF1	protein_coding	7:140453136	BRAF	protein_coding	THCA-CN	3	50	0.06	ICGC	GRCh37
18:24127012	KCTD1	protein_coding	7:140453136	BRAF	protein_coding	THCA-CN	3	50	0.06	ICGC	GRCh37
6:150263287	ULBP2	protein_coding	7:140453136	BRAF	protein_coding	THCA-CN	3	50	0.06	ICGC	GRCh37
17:38975319	TMEM99	none protein_coding	7:140453136	BRAF	protein_coding	THCA-CN	3	50	0.06	ICGC	GRCh37
15:65678318	IGDCC4	protein_coding	17:48692787	CACNA1G	protein_coding	THCA-CN	3	50	0.06	ICGC	GRCh37
1:29557390	MECR	protein_coding	17:48692787	CACNA1G	protein_coding	THCA-CN	3	50	0.06	ICGC	GRCh37
16:776315	HAGHL	protein_coding	17:48692787	CACNA1G	protein_coding	THCA-CN	3	50	0.06	ICGC	GRCh37
1:29557390	MECR	protein_coding	22:40066873	CACNA1I	protein_coding	THCA-CN	3	50	0.06	ICGC	GRCh37
1:161642774	FCGR2B	protein_coding	22:40066873	CACNA1I	protein_coding	THCA-CN	3	50	0.06	ICGC	GRCh37
16:29999266	TAOK2	protein_coding	7:94139514	CASD1	protein_coding	THCA-CN	3	50	0.06	ICGC	GRCh37
16:776315	HAGHL	protein_coding	7:94139514	CASD1	protein_coding	THCA-CN	3	50	0.06	ICGC	GRCh37
1:29557390	MECR	protein_coding	17:7809271	CHD3	protein_coding	THCA-CN	3	50	0.06	ICGC	GRCh37
1:110026628	ATXN7L2	protein_coding	17:7809271	CHD3	protein_coding	THCA-CN	3	50	0.06	ICGC	GRCh37
15:65678318	IGDCC4	protein_coding	17:7809271	CHD3	protein_coding	THCA-CN	3	50	0.06	ICGC	GRCh37
17:7809271	CHD3	protein_coding	3:184104344	CHRD	protein_coding	THCA-CN	3	50	0.06	ICGC	GRCh37
1:110026628	ATXN7L2	protein_coding	3:184104344	CHRD	protein_coding	THCA-CN	3	50	0.06	ICGC	GRCh37
1:161642774	FCGR2B	protein_coding	3:184104344	CHRD	protein_coding	THCA-CN	3	50	0.06	ICGC	GRCh37
17:72745164	RAB37	protein_coding	3:184104344	CHRD	protein_coding	THCA-CN	3	50	0.06	ICGC	GRCh37
20:18477732	RBBP9	protein_coding	3:184104344	CHRD	protein_coding	THCA-CN	3	50	0.06	ICGC	GRCh37
3:102181200	ZPLD1	protein_coding	3:184104344	CHRD	protein_coding	THCA-CN	3	50	0.06	ICGC	GRCh37
19:50435876	NUP62	protein_coding	3:184104344	CHRD	protein_coding	THCA-CN	3	50	0.06	ICGC	GRCh37
1:161642774	FCGR2B	protein_coding	17:61512597	CYB561	protein_coding	THCA-CN	3	50	0.06	ICGC	GRCh37
16:776315	HAGHL	protein_coding	17:61512597	CYB561	protein_coding	THCA-CN	3	50	0.06	ICGC	GRCh37
1:29557390	MECR	protein_coding	17:61512597	CYB561	protein_coding	THCA-CN	3	50	0.06	ICGC	GRCh37
17:48692787	CACNA1G	protein_coding	17:61512597	CYB561	protein_coding	THCA-CN	3	50	0.06	ICGC	GRCh37
1:110026628	ATXN7L2	protein_coding	5:10761137	DAP	protein_coding	THCA-CN	3	50	0.06	ICGC	GRCh37
17:77111772	RBFOX3	protein_coding	19:10935797	DNM2	protein_coding	THCA-CN	3	50	0.06	ICGC	GRCh37
17:48692787	CACNA1G	protein_coding	19:10935797	DNM2	protein_coding	THCA-CN	3	50	0.06	ICGC	GRCh37
16:29999266	TAOK2	protein_coding	19:10935797	DNM2	protein_coding	THCA-CN	3	50	0.06	ICGC	GRCh37
1:161642774	FCGR2B	protein_coding	19:10935797	DNM2	protein_coding	THCA-CN	3	50	0.06	ICGC	GRCh37
17:7809271	CHD3	protein_coding	19:10935797	DNM2	protein_coding	THCA-CN	3	50	0.06	ICGC	GRCh37
15:65678318	IGDCC4	protein_coding	19:10935797	DNM2	protein_coding	THCA-CN	3	50	0.06	ICGC	GRCh37
8:145095687	SPATC1	protein_coding	9:463655	DOCK8	protein_coding	THCA-CN	3	50	0.06	ICGC	GRCh37
19:42596335	POU2F2	protein_coding	3:75714807	DUX4L26	none protein_coding	THCA-CN	3	50	0.06	ICGC	GRCh37
19:42596335	POU2F2	protein_coding	20:33880040	FAM83C	protein_coding	THCA-CN	3	50	0.06	ICGC	GRCh37
15:65678318	IGDCC4	protein_coding	20:33880040	FAM83C	protein_coding	THCA-CN	3	50	0.06	ICGC	GRCh37
1:201179068	IGFN1	protein_coding	20:33880040	FAM83C	protein_coding	THCA-CN	3	50	0.06	ICGC	GRCh37
16:776315	HAGHL	protein_coding	20:33880040	FAM83C	protein_coding	THCA-CN	3	50	0.06	ICGC	GRCh37
1:110026628	ATXN7L2	protein_coding	1:161642774	FCGR2B	protein_coding	THCA-CN	3	50	0.06	ICGC	GRCh37
5:71490955	MAP1B	protein_coding	9:70177269	FOXD4L5	protein_coding	THCA-CN	3	50	0.06	ICGC	GRCh37
15:38776684	FAM98B	protein_coding	9:70177269	FOXD4L5	protein_coding	THCA-CN	3	50	0.06	ICGC	GRCh37
17:48692787	CACNA1G	protein_coding	4:48559517	FRYL	protein_coding	THCA-CN	3	50	0.06	ICGC	GRCh37
1:29557390	MECR	protein_coding	4:48559517	FRYL	protein_coding	THCA-CN	3	50	0.06	ICGC	GRCh37
1:161642774	FCGR2B	protein_coding	4:48559517	FRYL	protein_coding	THCA-CN	3	50	0.06	ICGC	GRCh37
22:40066873	CACNA1I	protein_coding	4:48559517	FRYL	protein_coding	THCA-CN	3	50	0.06	ICGC	GRCh37
17:72745164	RAB37	protein_coding	4:48559517	FRYL	protein_coding	THCA-CN	3	50	0.06	ICGC	GRCh37
2:230914604	SLC16A14	protein_coding	4:48559517	FRYL	protein_coding	THCA-CN	3	50	0.06	ICGC	GRCh37
16:29999266	TAOK2	protein_coding	16:776315	HAGHL	protein_coding	THCA-CN	3	50	0.06	ICGC	GRCh37
1:161642774	FCGR2B	protein_coding	16:776315	HAGHL	protein_coding	THCA-CN	3	50	0.06	ICGC	GRCh37
1:29557390	MECR	protein_coding	16:776315	HAGHL	protein_coding	THCA-CN	3	50	0.06	ICGC	GRCh37
10:88476170	LDB3	protein_coding	4:8869661	HMX1	protein_coding	THCA-CN	3	50	0.06	ICGC	GRCh37
1:29557390	MECR	protein_coding	15:65678318	IGDCC4	protein_coding	THCA-CN	3	50	0.06	ICGC	GRCh37
1:161642774	FCGR2B	protein_coding	15:65678318	IGDCC4	protein_coding	THCA-CN	3	50	0.06	ICGC	GRCh37
1:161642774	FCGR2B	protein_coding	19:2248265	JSRP1	protein_coding	THCA-CN	3	50	0.06	ICGC	GRCh37
15:65678318	IGDCC4	protein_coding	19:2248265	JSRP1	protein_coding	THCA-CN	3	50	0.06	ICGC	GRCh37
16:776315	HAGHL	protein_coding	19:2248265	JSRP1	protein_coding	THCA-CN	3	50	0.06	ICGC	GRCh37
11:64032516	PLCB3	protein_coding	18:24127012	KCTD1	protein_coding	THCA-CN	3	50	0.06	ICGC	GRCh37
17:8047048	PER1	protein_coding	18:24127012	KCTD1	protein_coding	THCA-CN	3	50	0.06	ICGC	GRCh37
3:102181200	ZPLD1	protein_coding	7:20198700	MACC1	protein_coding	THCA-CN	3	50	0.06	ICGC	GRCh37
20:18477732	RBBP9	protein_coding	7:20198700	MACC1	protein_coding	THCA-CN	3	50	0.06	ICGC	GRCh37
17:48692787	CACNA1G	protein_coding	7:20198700	MACC1	protein_coding	THCA-CN	3	50	0.06	ICGC	GRCh37
4:48559517	FRYL	protein_coding	7:20198700	MACC1	protein_coding	THCA-CN	3	50	0.06	ICGC	GRCh37
19:2248265	JSRP1	protein_coding	7:20198700	MACC1	protein_coding	THCA-CN	3	50	0.06	ICGC	GRCh37
3:184104344	CHRD	protein_coding	7:20198700	MACC1	protein_coding	THCA-CN	3	50	0.06	ICGC	GRCh37
5:71490955	MAP1B	protein_coding	7:20198700	MACC1	protein_coding	THCA-CN	3	50	0.06	ICGC	GRCh37
6:10410472	TFAP2A	protein_coding	7:20198700	MACC1	protein_coding	THCA-CN	3	50	0.06	ICGC	GRCh37
16:776315	HAGHL	protein_coding	7:20198700	MACC1	protein_coding	THCA-CN	3	50	0.06	ICGC	GRCh37
15:65678318	IGDCC4	protein_coding	5:71490955	MAP1B	protein_coding	THCA-CN	3	50	0.06	ICGC	GRCh37
1:161642774	FCGR2B	protein_coding	5:71490955	MAP1B	protein_coding	THCA-CN	3	50	0.06	ICGC	GRCh37
3:75714807	DUX4L26	none protein_coding	5:71490955	MAP1B	protein_coding	THCA-CN	3	50	0.06	ICGC	GRCh37
17:48692787	CACNA1G	protein_coding	5:71490955	MAP1B	protein_coding	THCA-CN	3	50	0.06	ICGC	GRCh37
20:18477732	RBBP9	protein_coding	5:71490955	MAP1B	protein_coding	THCA-CN	3	50	0.06	ICGC	GRCh37
2:230914604	SLC16A14	protein_coding	5:71490955	MAP1B	protein_coding	THCA-CN	3	50	0.06	ICGC	GRCh37
17:7809271	CHD3	protein_coding	5:71490955	MAP1B	protein_coding	THCA-CN	3	50	0.06	ICGC	GRCh37
4:48559517	FRYL	protein_coding	5:71490955	MAP1B	protein_coding	THCA-CN	3	50	0.06	ICGC	GRCh37
19:10935797	DNM2	protein_coding	5:71490955	MAP1B	protein_coding	THCA-CN	3	50	0.06	ICGC	GRCh37
15:82336400	MEX3B	protein_coding	15:82336406	MEX3B	protein_coding	THCA-CN	3	50	0.06	ICGC	GRCh37
12:50745822	FAM186A	protein_coding	7:73011743	MLXIPL	protein_coding	THCA-CN	3	50	0.06	ICGC	GRCh37
2:230914604	SLC16A14	protein_coding	2:242011127	MTERF4	protein_coding	THCA-CN	3	50	0.06	ICGC	GRCh37
16:29999266	TAOK2	protein_coding	2:242011127	MTERF4	protein_coding	THCA-CN	3	50	0.06	ICGC	GRCh37
1:29557390	MECR	protein_coding	2:242011127	MTERF4	protein_coding	THCA-CN	3	50	0.06	ICGC	GRCh37
20:18477732	RBBP9	protein_coding	2:242011127	MTERF4	protein_coding	THCA-CN	3	50	0.06	ICGC	GRCh37
12:53207583	KRT4	protein_coding	3:195507324	MUC4	protein_coding	THCA-CN	3	50	0.06	ICGC	GRCh37
1:161642774	FCGR2B	protein_coding	9:139417464	NOTCH1	protein_coding	THCA-CN	3	50	0.06	ICGC	GRCh37
16:67876755	NUTF2	protein_coding	9:139417464	NOTCH1	protein_coding	THCA-CN	3	50	0.06	ICGC	GRCh37
3:184104344	CHRD	protein_coding	9:139417464	NOTCH1	protein_coding	THCA-CN	3	50	0.06	ICGC	GRCh37
3:102181200	ZPLD1	protein_coding	9:139417464	NOTCH1	protein_coding	THCA-CN	3	50	0.06	ICGC	GRCh37
1:27878416	AHDC1	protein_coding	9:139417464	NOTCH1	protein_coding	THCA-CN	3	50	0.06	ICGC	GRCh37
7:140453136	BRAF	protein_coding	9:139417464	NOTCH1	protein_coding	THCA-CN	3	50	0.06	ICGC	GRCh37
6:150263287	ULBP2	protein_coding	9:139417464	NOTCH1	protein_coding	THCA-CN	3	50	0.06	ICGC	GRCh37
3:195507324	MUC4	protein_coding	9:97080947	NUTM2F	protein_coding	THCA-CN	3	50	0.06	ICGC	GRCh37
19:40719921	MAP3K10	protein_coding	9:97080947	NUTM2F	protein_coding	THCA-CN	3	50	0.06	ICGC	GRCh37
7:140453136	BRAF	protein_coding	9:97080947	NUTM2F	protein_coding	THCA-CN	3	50	0.06	ICGC	GRCh37
8:101730073	PABPC1	protein_coding	9:97080947	NUTM2F	protein_coding	THCA-CN	3	50	0.06	ICGC	GRCh37
18:24127012	KCTD1	protein_coding	5:140590211	PCDHB12	protein_coding	THCA-CN	3	50	0.06	ICGC	GRCh37
1:161642774	FCGR2B	protein_coding	8:52733079	PCMTD1	protein_coding	THCA-CN	3	50	0.06	ICGC	GRCh37
16:776315	HAGHL	protein_coding	17:8047048	PER1	protein_coding	THCA-CN	3	50	0.06	ICGC	GRCh37
1:29557390	MECR	protein_coding	6:83892687	PGM3	protein_coding	THCA-CN	3	50	0.06	ICGC	GRCh37
6:150263287	ULBP2	protein_coding	6:83892687	PGM3	protein_coding	THCA-CN	3	50	0.06	ICGC	GRCh37
19:2248265	JSRP1	protein_coding	6:83892687	PGM3	protein_coding	THCA-CN	3	50	0.06	ICGC	GRCh37
17:77111772	RBFOX3	protein_coding	19:42596335	POU2F2	protein_coding	THCA-CN	3	50	0.06	ICGC	GRCh37
15:38776684	FAM98B	protein_coding	19:42596335	POU2F2	protein_coding	THCA-CN	3	50	0.06	ICGC	GRCh37
15:65678318	IGDCC4	protein_coding	20:18477732	RBBP9	protein_coding	THCA-CN	3	50	0.06	ICGC	GRCh37
16:776315	HAGHL	protein_coding	20:18477732	RBBP9	protein_coding	THCA-CN	3	50	0.06	ICGC	GRCh37
17:48692787	CACNA1G	protein_coding	20:18477732	RBBP9	protein_coding	THCA-CN	3	50	0.06	ICGC	GRCh37
1:161642774	FCGR2B	protein_coding	20:18477732	RBBP9	protein_coding	THCA-CN	3	50	0.06	ICGC	GRCh37
15:65678318	IGDCC4	protein_coding	17:77111772	RBFOX3	protein_coding	THCA-CN	3	50	0.06	ICGC	GRCh37
17:77111772	RBFOX3	protein_coding	2:230914604	SLC16A14	protein_coding	THCA-CN	3	50	0.06	ICGC	GRCh37
15:65678318	IGDCC4	protein_coding	2:230914604	SLC16A14	protein_coding	THCA-CN	3	50	0.06	ICGC	GRCh37
19:2248265	JSRP1	protein_coding	2:230914604	SLC16A14	protein_coding	THCA-CN	3	50	0.06	ICGC	GRCh37
16:776315	HAGHL	protein_coding	2:230914604	SLC16A14	protein_coding	THCA-CN	3	50	0.06	ICGC	GRCh37
20:18477732	RBBP9	protein_coding	2:230914604	SLC16A14	protein_coding	THCA-CN	3	50	0.06	ICGC	GRCh37
16:29999266	TAOK2	protein_coding	6:127837125	SOGA3	protein_coding	THCA-CN	3	50	0.06	ICGC	GRCh37
6:10410472	TFAP2A	protein_coding	6:127837125	SOGA3	protein_coding	THCA-CN	3	50	0.06	ICGC	GRCh37
15:38776684	FAM98B	protein_coding	8:145095687	SPATC1	protein_coding	THCA-CN	3	50	0.06	ICGC	GRCh37
6:150263287	ULBP2	protein_coding	8:145095684	SPATC1	protein_coding	THCA-CN	3	50	0.06	ICGC	GRCh37
22:40066873	CACNA1I	protein_coding	8:145095687	SPATC1	protein_coding	THCA-CN	3	50	0.06	ICGC	GRCh37
6:150263287	ULBP2	protein_coding	8:145095687	SPATC1	protein_coding	THCA-CN	3	50	0.06	ICGC	GRCh37
1:161642774	FCGR2B	protein_coding	6:10410472	TFAP2A	protein_coding	THCA-CN	3	50	0.06	ICGC	GRCh37
1:110026628	ATXN7L2	protein_coding	6:10410472	TFAP2A	protein_coding	THCA-CN	3	50	0.06	ICGC	GRCh37
18:24127012	KCTD1	protein_coding	6:10410472	TFAP2A	protein_coding	THCA-CN	3	50	0.06	ICGC	GRCh37
1:161642774	FCGR2B	protein_coding	6:10410466	TFAP2A	protein_coding	THCA-CN	3	50	0.06	ICGC	GRCh37
4:48559517	FRYL	protein_coding	6:10410472	TFAP2A	protein_coding	THCA-CN	3	50	0.06	ICGC	GRCh37
22:40066873	CACNA1I	protein_coding	6:10410472	TFAP2A	protein_coding	THCA-CN	3	50	0.06	ICGC	GRCh37
20:18477732	RBBP9	protein_coding	6:10410472	TFAP2A	protein_coding	THCA-CN	3	50	0.06	ICGC	GRCh37
2:230914604	SLC16A14	protein_coding	6:10410472	TFAP2A	protein_coding	THCA-CN	3	50	0.06	ICGC	GRCh37
15:65678318	IGDCC4	protein_coding	6:10410472	TFAP2A	protein_coding	THCA-CN	3	50	0.06	ICGC	GRCh37
16:776315	HAGHL	protein_coding	6:10410466	TFAP2A	protein_coding	THCA-CN	3	50	0.06	ICGC	GRCh37
20:18477732	RBBP9	protein_coding	6:10410466	TFAP2A	protein_coding	THCA-CN	3	50	0.06	ICGC	GRCh37
5:71490955	MAP1B	protein_coding	6:10410472	TFAP2A	protein_coding	THCA-CN	3	50	0.06	ICGC	GRCh37
17:48692787	CACNA1G	protein_coding	6:10410472	TFAP2A	protein_coding	THCA-CN	3	50	0.06	ICGC	GRCh37
19:2248265	JSRP1	protein_coding	6:10410472	TFAP2A	protein_coding	THCA-CN	3	50	0.06	ICGC	GRCh37
2:230914604	SLC16A14	protein_coding	6:10410466	TFAP2A	protein_coding	THCA-CN	3	50	0.06	ICGC	GRCh37
6:10410466	TFAP2A	protein_coding	6:10410472	TFAP2A	protein_coding	THCA-CN	3	50	0.06	ICGC	GRCh37
16:776315	HAGHL	protein_coding	6:10410472	TFAP2A	protein_coding	THCA-CN	3	50	0.06	ICGC	GRCh37
3:75714807	DUX4L26	none protein_coding	6:10410472	TFAP2A	protein_coding	THCA-CN	3	50	0.06	ICGC	GRCh37
2:233271799	ALPG	protein_coding	6:10410472	TFAP2A	protein_coding	THCA-CN	3	50	0.06	ICGC	GRCh37
11:64032516	PLCB3	protein_coding	17:38975319	TMEM99	none protein_coding	THCA-CN	3	50	0.06	ICGC	GRCh37
6:10410472	TFAP2A	protein_coding	7:5413839	TNRC18	protein_coding	THCA-CN	3	50	0.06	ICGC	GRCh37
7:20198700	MACC1	protein_coding	7:5413839	TNRC18	protein_coding	THCA-CN	3	50	0.06	ICGC	GRCh37
4:48559517	FRYL	protein_coding	6:150263287	ULBP2	protein_coding	THCA-CN	3	50	0.06	ICGC	GRCh37
4:8869661	HMX1	protein_coding	6:150263287	ULBP2	protein_coding	THCA-CN	3	50	0.06	ICGC	GRCh37
15:65678318	IGDCC4	protein_coding	6:150263287	ULBP2	protein_coding	THCA-CN	3	50	0.06	ICGC	GRCh37
19:42596335	POU2F2	protein_coding	6:150263287	ULBP2	protein_coding	THCA-CN	3	50	0.06	ICGC	GRCh37
17:48692787	CACNA1G	protein_coding	6:150263287	ULBP2	protein_coding	THCA-CN	3	50	0.06	ICGC	GRCh37
22:40066873	CACNA1I	protein_coding	6:150263287	ULBP2	protein_coding	THCA-CN	3	50	0.06	ICGC	GRCh37
15:38776684	FAM98B	protein_coding	6:150263287	ULBP2	protein_coding	THCA-CN	3	50	0.06	ICGC	GRCh37
17:7809271	CHD3	protein_coding	6:150263287	ULBP2	protein_coding	THCA-CN	3	50	0.06	ICGC	GRCh37
19:50435876	NUP62	protein_coding	6:150263287	ULBP2	protein_coding	THCA-CN	3	50	0.06	ICGC	GRCh37
6:10410472	TFAP2A	protein_coding	6:150263287	ULBP2	protein_coding	THCA-CN	3	50	0.06	ICGC	GRCh37
1:110026628	ATXN7L2	protein_coding	6:150263287	ULBP2	protein_coding	THCA-CN	3	50	0.06	ICGC	GRCh37
3:184104344	CHRD	protein_coding	9:96055149	WNK2	protein_coding	THCA-CN	3	50	0.06	ICGC	GRCh37
16:67876755	NUTF2	protein_coding	9:96055149	WNK2	protein_coding	THCA-CN	3	50	0.06	ICGC	GRCh37
3:102181200	ZPLD1	protein_coding	9:96055149	WNK2	protein_coding	THCA-CN	3	50	0.06	ICGC	GRCh37
17:7809271	CHD3	protein_coding	9:96055149	WNK2	protein_coding	THCA-CN	3	50	0.06	ICGC	GRCh37
19:50435876	NUP62	protein_coding	9:96055149	WNK2	protein_coding	THCA-CN	3	50	0.06	ICGC	GRCh37
7:140453136	BRAF	protein_coding	9:96055149	WNK2	protein_coding	THCA-CN	3	50	0.06	ICGC	GRCh37
9:139417464	NOTCH1	protein_coding	9:96055149	WNK2	protein_coding	THCA-CN	3	50	0.06	ICGC	GRCh37
1:161642774	FCGR2B	protein_coding	9:96055149	WNK2	protein_coding	THCA-CN	3	50	0.06	ICGC	GRCh37
18:24127012	KCTD1	protein_coding	8:17014282	ZDHHC2	protein_coding	THCA-CN	3	50	0.06	ICGC	GRCh37
2:233271799	ALPG	protein_coding	8:17014282	ZDHHC2	protein_coding	THCA-CN	3	50	0.06	ICGC	GRCh37
1:16903882	NBPF1	protein_coding	8:17014282	ZDHHC2	protein_coding	THCA-CN	3	50	0.06	ICGC	GRCh37
16:67876755	NUTF2	protein_coding	8:17014282	ZDHHC2	protein_coding	THCA-CN	3	50	0.06	ICGC	GRCh37
16:776315	HAGHL	protein_coding	3:102181200	ZPLD1	protein_coding	THCA-CN	3	50	0.06	ICGC	GRCh37
17:61512597	CYB561	protein_coding	3:102181200	ZPLD1	protein_coding	THCA-CN	3	50	0.06	ICGC	GRCh37
20:18477732	RBBP9	protein_coding	3:102181200	ZPLD1	protein_coding	THCA-CN	3	50	0.06	ICGC	GRCh37
1:47904684	FOXD2-AS1	none protein_coding	17:39346621	KRTAP9-1	protein_coding	LMS-FR	4	67	0.0597014925373134	ICGC	GRCh37
2:120194652	TMEM37	protein_coding	X:114425216	LRCH2	protein_coding	LMS-FR	4	67	0.0597014925373134	ICGC	GRCh37
11:3661589	ART5	protein_coding	X:114425216	LRCH2	protein_coding	LMS-FR	4	67	0.0597014925373134	ICGC	GRCh37
1:117122309	IGSF3	protein_coding	2:120194652	TMEM37	protein_coding	LMS-FR	4	67	0.0597014925373134	ICGC	GRCh37
11:3661589	ART5	protein_coding	2:120194651	TMEM37	protein_coding	LMS-FR	4	67	0.0597014925373134	ICGC	GRCh37
11:111742145	AP001781.2	protein_coding	2:120194652	TMEM37	protein_coding	LMS-FR	4	67	0.0597014925373134	ICGC	GRCh37
17:39346621	KRTAP9-1	protein_coding	2:120194652	TMEM37	protein_coding	LMS-FR	4	67	0.0597014925373134	ICGC	GRCh37
19:55790901	HSPBP1	protein_coding	2:120194651	TMEM37	protein_coding	LMS-FR	4	67	0.0597014925373134	ICGC	GRCh37
7:140453136	BRAF	protein_coding	2:148683686	ACVR2A	protein_coding	Colon Colorectal Cancer	4	76	0.0526315789473684	DepMap	GRCh37
10:28233229	ARMC4	protein_coding	2:148683686	ACVR2A	protein_coding	Colon Colorectal Cancer	4	76	0.0526315789473684	DepMap	GRCh37
7:11022323	PHF14	protein_coding	2:148683686	ACVR2A	protein_coding	Colon Colorectal Cancer	4	76	0.0526315789473684	DepMap	GRCh37
3:51417604	DOCK3	protein_coding	10:111893350	ADD3	protein_coding	Colon Colorectal Cancer	4	76	0.0526315789473684	DepMap	GRCh37
1:27621108	WDTC1	protein_coding	10:111893350	ADD3	protein_coding	Colon Colorectal Cancer	4	76	0.0526315789473684	DepMap	GRCh37
1:204228411	PLEKHA6	protein_coding	10:111893350	ADD3	protein_coding	Colon Colorectal Cancer	4	76	0.0526315789473684	DepMap	GRCh37
17:56435161	RNF43	protein_coding	10:111893350	ADD3	protein_coding	Colon Colorectal Cancer	4	76	0.0526315789473684	DepMap	GRCh37
12:48458896	SENP1	protein_coding	10:111893350	ADD3	protein_coding	Colon Colorectal Cancer	4	76	0.0526315789473684	DepMap	GRCh37
6:139097330	CCDC28A	protein_coding	10:111893350	ADD3	protein_coding	Colon Colorectal Cancer	4	76	0.0526315789473684	DepMap	GRCh37
10:114925317	TCF7L2	protein_coding	10:111893350	ADD3	protein_coding	Colon Colorectal Cancer	4	76	0.0526315789473684	DepMap	GRCh37
10:114925317	TCF7L2	protein_coding	7:100802405	AP1S1	protein_coding	Colon Colorectal Cancer	4	76	0.0526315789473684	DepMap	GRCh37
12:25398284	KRAS	protein_coding	2:203420130	BMPR2	protein_coding	Colon Colorectal Cancer	4	76	0.0526315789473684	DepMap	GRCh37
5:36985083	NIPBL	protein_coding	6:139097330	CCDC28A	protein_coding	Colon Colorectal Cancer	4	76	0.0526315789473684	DepMap	GRCh37
12:25398284	KRAS	protein_coding	11:32637520	CCDC73	protein_coding	Colon Colorectal Cancer	4	76	0.0526315789473684	DepMap	GRCh37
12:25398284	KRAS	protein_coding	20:47858504	DDX27	protein_coding	Colon Colorectal Cancer	4	76	0.0526315789473684	DepMap	GRCh37
10:114925317	TCF7L2	protein_coding	1:200594042	DDX59	protein_coding	Colon Colorectal Cancer	4	76	0.0526315789473684	DepMap	GRCh37
12:25398284	KRAS	protein_coding	1:200594042	DDX59	protein_coding	Colon Colorectal Cancer	4	76	0.0526315789473684	DepMap	GRCh37
7:100802405	AP1S1	protein_coding	3:51417604	DOCK3	protein_coding	Colon Colorectal Cancer	4	76	0.0526315789473684	DepMap	GRCh37
5:36985083	NIPBL	protein_coding	3:51417604	DOCK3	protein_coding	Colon Colorectal Cancer	4	76	0.0526315789473684	DepMap	GRCh37
1:204228411	PLEKHA6	protein_coding	3:51417604	DOCK3	protein_coding	Colon Colorectal Cancer	4	76	0.0526315789473684	DepMap	GRCh37
1:223176250	DISP1	protein_coding	21:37653892	DOPEY2	NA	Colon Colorectal Cancer	4	76	0.0526315789473684	DepMap	GRCh37
17:39724451	KRT9	protein_coding	21:37653892	DOPEY2	NA	Colon Colorectal Cancer	4	76	0.0526315789473684	DepMap	GRCh37
10:28233229	ARMC4	protein_coding	21:37653892	DOPEY2	NA	Colon Colorectal Cancer	4	76	0.0526315789473684	DepMap	GRCh37
1:27621108	WDTC1	protein_coding	16:4862228	GLYR1	protein_coding	Colon Colorectal Cancer	4	76	0.0526315789473684	DepMap	GRCh37
20:47858504	DDX27	protein_coding	16:4862228	GLYR1	protein_coding	Colon Colorectal Cancer	4	76	0.0526315789473684	DepMap	GRCh37
10:114925317	TCF7L2	protein_coding	16:4862228	GLYR1	protein_coding	Colon Colorectal Cancer	4	76	0.0526315789473684	DepMap	GRCh37
3:51417604	DOCK3	protein_coding	16:4862228	GLYR1	protein_coding	Colon Colorectal Cancer	4	76	0.0526315789473684	DepMap	GRCh37
2:203420130	BMPR2	protein_coding	16:4862228	GLYR1	protein_coding	Colon Colorectal Cancer	4	76	0.0526315789473684	DepMap	GRCh37
7:100802405	AP1S1	protein_coding	16:4862228	GLYR1	protein_coding	Colon Colorectal Cancer	4	76	0.0526315789473684	DepMap	GRCh37
10:64159513	ZNF365	protein_coding	16:4862228	GLYR1	protein_coding	Colon Colorectal Cancer	4	76	0.0526315789473684	DepMap	GRCh37
12:48458896	SENP1	protein_coding	16:4862228	GLYR1	protein_coding	Colon Colorectal Cancer	4	76	0.0526315789473684	DepMap	GRCh37
8:95686611	ESRP1	protein_coding	12:57422573	MYO1A	protein_coding	Colon Colorectal Cancer	4	76	0.0526315789473684	DepMap	GRCh37
1:204228411	PLEKHA6	protein_coding	12:57422573	MYO1A	protein_coding	Colon Colorectal Cancer	4	76	0.0526315789473684	DepMap	GRCh37
5:36985083	NIPBL	protein_coding	12:57422573	MYO1A	protein_coding	Colon Colorectal Cancer	4	76	0.0526315789473684	DepMap	GRCh37
1:24078404	TCEB3	NA	12:57422573	MYO1A	protein_coding	Colon Colorectal Cancer	4	76	0.0526315789473684	DepMap	GRCh37
11:4703475	OR51E2	protein_coding	12:57422573	MYO1A	protein_coding	Colon Colorectal Cancer	4	76	0.0526315789473684	DepMap	GRCh37
19:49850473	TEAD2	protein_coding	12:57422573	MYO1A	protein_coding	Colon Colorectal Cancer	4	76	0.0526315789473684	DepMap	GRCh37
20:47858504	DDX27	protein_coding	12:57422573	MYO1A	protein_coding	Colon Colorectal Cancer	4	76	0.0526315789473684	DepMap	GRCh37
6:139097330	CCDC28A	protein_coding	12:57422573	MYO1A	protein_coding	Colon Colorectal Cancer	4	76	0.0526315789473684	DepMap	GRCh37
7:100479332	SRRT	protein_coding	12:57422573	MYO1A	protein_coding	Colon Colorectal Cancer	4	76	0.0526315789473684	DepMap	GRCh37
10:64159513	ZNF365	protein_coding	12:57422573	MYO1A	protein_coding	Colon Colorectal Cancer	4	76	0.0526315789473684	DepMap	GRCh37
2:203420130	BMPR2	protein_coding	5:36985083	NIPBL	protein_coding	Colon Colorectal Cancer	4	76	0.0526315789473684	DepMap	GRCh37
10:114925317	TCF7L2	protein_coding	5:36985083	NIPBL	protein_coding	Colon Colorectal Cancer	4	76	0.0526315789473684	DepMap	GRCh37
12:25398284	KRAS	protein_coding	5:36985083	NIPBL	protein_coding	Colon Colorectal Cancer	4	76	0.0526315789473684	DepMap	GRCh37
11:32637520	CCDC73	protein_coding	11:4703475	OR51E2	protein_coding	Colon Colorectal Cancer	4	76	0.0526315789473684	DepMap	GRCh37
10:64159513	ZNF365	protein_coding	11:4703475	OR51E2	protein_coding	Colon Colorectal Cancer	4	76	0.0526315789473684	DepMap	GRCh37
1:204228411	PLEKHA6	protein_coding	11:4703475	OR51E2	protein_coding	Colon Colorectal Cancer	4	76	0.0526315789473684	DepMap	GRCh37
3:51417604	DOCK3	protein_coding	11:4703475	OR51E2	protein_coding	Colon Colorectal Cancer	4	76	0.0526315789473684	DepMap	GRCh37
2:203420130	BMPR2	protein_coding	11:4703475	OR51E2	protein_coding	Colon Colorectal Cancer	4	76	0.0526315789473684	DepMap	GRCh37
17:39724451	KRT9	protein_coding	11:55861307	OR8I2	protein_coding	Colon Colorectal Cancer	4	76	0.0526315789473684	DepMap	GRCh37
11:43471750	TTC17	protein_coding	11:55861307	OR8I2	protein_coding	Colon Colorectal Cancer	4	76	0.0526315789473684	DepMap	GRCh37
11:4703475	OR51E2	protein_coding	17:56435161	RNF43	protein_coding	Colon Colorectal Cancer	4	76	0.0526315789473684	DepMap	GRCh37
8:103289349	UBR5	protein_coding	17:56435161	RNF43	protein_coding	Colon Colorectal Cancer	4	76	0.0526315789473684	DepMap	GRCh37
20:47858504	DDX27	protein_coding	17:56435161	RNF43	protein_coding	Colon Colorectal Cancer	4	76	0.0526315789473684	DepMap	GRCh37
11:32637520	CCDC73	protein_coding	17:56435161	RNF43	protein_coding	Colon Colorectal Cancer	4	76	0.0526315789473684	DepMap	GRCh37
5:36985083	NIPBL	protein_coding	17:56435161	RNF43	protein_coding	Colon Colorectal Cancer	4	76	0.0526315789473684	DepMap	GRCh37
16:4862228	GLYR1	protein_coding	17:56435161	RNF43	protein_coding	Colon Colorectal Cancer	4	76	0.0526315789473684	DepMap	GRCh37
1:27621108	WDTC1	protein_coding	17:56435161	RNF43	protein_coding	Colon Colorectal Cancer	4	76	0.0526315789473684	DepMap	GRCh37
1:204228411	PLEKHA6	protein_coding	17:56435161	RNF43	protein_coding	Colon Colorectal Cancer	4	76	0.0526315789473684	DepMap	GRCh37
7:11022323	PHF14	protein_coding	1:6257785	RPL22	protein_coding	Colon Colorectal Cancer	4	76	0.0526315789473684	DepMap	GRCh37
10:28233229	ARMC4	protein_coding	1:6257785	RPL22	protein_coding	Colon Colorectal Cancer	4	76	0.0526315789473684	DepMap	GRCh37
1:204228411	PLEKHA6	protein_coding	12:48458896	SENP1	protein_coding	Colon Colorectal Cancer	4	76	0.0526315789473684	DepMap	GRCh37
7:100802405	AP1S1	protein_coding	12:48458896	SENP1	protein_coding	Colon Colorectal Cancer	4	76	0.0526315789473684	DepMap	GRCh37
12:25398284	KRAS	protein_coding	12:48458896	SENP1	protein_coding	Colon Colorectal Cancer	4	76	0.0526315789473684	DepMap	GRCh37
1:24078404	TCEB3	NA	7:100479332	SRRT	protein_coding	Colon Colorectal Cancer	4	76	0.0526315789473684	DepMap	GRCh37
17:56435161	RNF43	protein_coding	7:100479332	SRRT	protein_coding	Colon Colorectal Cancer	4	76	0.0526315789473684	DepMap	GRCh37
10:114925317	TCF7L2	protein_coding	7:100479332	SRRT	protein_coding	Colon Colorectal Cancer	4	76	0.0526315789473684	DepMap	GRCh37
2:203420130	BMPR2	protein_coding	7:100479332	SRRT	protein_coding	Colon Colorectal Cancer	4	76	0.0526315789473684	DepMap	GRCh37
7:100802405	AP1S1	protein_coding	7:100479332	SRRT	protein_coding	Colon Colorectal Cancer	4	76	0.0526315789473684	DepMap	GRCh37
19:49850473	TEAD2	protein_coding	7:100479332	SRRT	protein_coding	Colon Colorectal Cancer	4	76	0.0526315789473684	DepMap	GRCh37
11:32637520	CCDC73	protein_coding	10:114925317	TCF7L2	protein_coding	Colon Colorectal Cancer	4	76	0.0526315789473684	DepMap	GRCh37
12:25398284	KRAS	protein_coding	10:114925317	TCF7L2	protein_coding	Colon Colorectal Cancer	4	76	0.0526315789473684	DepMap	GRCh37
1:204228411	PLEKHA6	protein_coding	10:114925317	TCF7L2	protein_coding	Colon Colorectal Cancer	4	76	0.0526315789473684	DepMap	GRCh37
12:25398284	KRAS	protein_coding	19:49850473	TEAD2	protein_coding	Colon Colorectal Cancer	4	76	0.0526315789473684	DepMap	GRCh37
12:48458896	SENP1	protein_coding	19:49850473	TEAD2	protein_coding	Colon Colorectal Cancer	4	76	0.0526315789473684	DepMap	GRCh37
2:203420130	BMPR2	protein_coding	19:49850473	TEAD2	protein_coding	Colon Colorectal Cancer	4	76	0.0526315789473684	DepMap	GRCh37
1:204228411	PLEKHA6	protein_coding	19:49850473	TEAD2	protein_coding	Colon Colorectal Cancer	4	76	0.0526315789473684	DepMap	GRCh37
6:139097330	CCDC28A	protein_coding	19:49850473	TEAD2	protein_coding	Colon Colorectal Cancer	4	76	0.0526315789473684	DepMap	GRCh37
5:36985083	NIPBL	protein_coding	10:98336475	TM9SF3	protein_coding	Colon Colorectal Cancer	4	76	0.0526315789473684	DepMap	GRCh37
10:64159513	ZNF365	protein_coding	10:98336475	TM9SF3	protein_coding	Colon Colorectal Cancer	4	76	0.0526315789473684	DepMap	GRCh37
8:103289349	UBR5	protein_coding	10:98336475	TM9SF3	protein_coding	Colon Colorectal Cancer	4	76	0.0526315789473684	DepMap	GRCh37
11:4703475	OR51E2	protein_coding	8:103289349	UBR5	protein_coding	Colon Colorectal Cancer	4	76	0.0526315789473684	DepMap	GRCh37
2:203420130	BMPR2	protein_coding	8:103289349	UBR5	protein_coding	Colon Colorectal Cancer	4	76	0.0526315789473684	DepMap	GRCh37
10:114925317	TCF7L2	protein_coding	8:103289349	UBR5	protein_coding	Colon Colorectal Cancer	4	76	0.0526315789473684	DepMap	GRCh37
16:4862228	GLYR1	protein_coding	8:103289349	UBR5	protein_coding	Colon Colorectal Cancer	4	76	0.0526315789473684	DepMap	GRCh37
1:24078404	TCEB3	NA	8:103289349	UBR5	protein_coding	Colon Colorectal Cancer	4	76	0.0526315789473684	DepMap	GRCh37
7:100802405	AP1S1	protein_coding	8:103289349	UBR5	protein_coding	Colon Colorectal Cancer	4	76	0.0526315789473684	DepMap	GRCh37
6:139097330	CCDC28A	protein_coding	17:48433967	XYLT2	protein_coding	Colon Colorectal Cancer	4	76	0.0526315789473684	DepMap	GRCh37
12:25398284	KRAS	protein_coding	17:48433967	XYLT2	protein_coding	Colon Colorectal Cancer	4	76	0.0526315789473684	DepMap	GRCh37
1:27621108	WDTC1	protein_coding	17:48433967	XYLT2	protein_coding	Colon Colorectal Cancer	4	76	0.0526315789473684	DepMap	GRCh37
16:4862228	GLYR1	protein_coding	17:48433967	XYLT2	protein_coding	Colon Colorectal Cancer	4	76	0.0526315789473684	DepMap	GRCh37
2:203420130	BMPR2	protein_coding	17:48433967	XYLT2	protein_coding	Colon Colorectal Cancer	4	76	0.0526315789473684	DepMap	GRCh37
10:114925317	TCF7L2	protein_coding	10:64159513	ZNF365	protein_coding	Colon Colorectal Cancer	4	76	0.0526315789473684	DepMap	GRCh37
2:203420130	BMPR2	protein_coding	10:64159513	ZNF365	protein_coding	Colon Colorectal Cancer	4	76	0.0526315789473684	DepMap	GRCh37
3:51417604	DOCK3	protein_coding	10:64159513	ZNF365	protein_coding	Colon Colorectal Cancer	4	76	0.0526315789473684	DepMap	GRCh37
8:95686611	ESRP1	protein_coding	10:64159513	ZNF365	protein_coding	Colon Colorectal Cancer	4	76	0.0526315789473684	DepMap	GRCh37
16:57847637	AC092118.1	none protein_coding	19:1004897	AC004528.1	none protein_coding	LMS-FR	3	67	0.0447761194029851	ICGC	GRCh37
11:3661589	ART5	protein_coding	9:95237068	ASPN	protein_coding	LMS-FR	3	67	0.0447761194029851	ICGC	GRCh37
16:57847637	AC092118.1	none protein_coding	5:139931629	EIF4EBP3	protein_coding	LMS-FR	3	67	0.0447761194029851	ICGC	GRCh37
11:3661589	ART5	protein_coding	19:55790901	HSPBP1	protein_coding	LMS-FR	3	67	0.0447761194029851	ICGC	GRCh37
16:57847637	AC092118.1	none protein_coding	17:39346621	KRTAP9-1	protein_coding	LMS-FR	3	67	0.0447761194029851	ICGC	GRCh37
17:39305784	KRTAP4-5	protein_coding	17:39346621	KRTAP9-1	protein_coding	LMS-FR	3	67	0.0447761194029851	ICGC	GRCh37
11:111742145	AP001781.2	protein_coding	X:114425216	LRCH2	protein_coding	LMS-FR	3	67	0.0447761194029851	ICGC	GRCh37
19:55790901	HSPBP1	protein_coding	X:114425216	LRCH2	protein_coding	LMS-FR	3	67	0.0447761194029851	ICGC	GRCh37
16:57847637	AC092118.1	none protein_coding	2:120194652	TMEM37	protein_coding	LMS-FR	3	67	0.0447761194029851	ICGC	GRCh37
11:111742145	AP001781.2	protein_coding	2:120194651	TMEM37	protein_coding	LMS-FR	3	67	0.0447761194029851	ICGC	GRCh37
16:57847637	AC092118.1	none protein_coding	2:120194651	TMEM37	protein_coding	LMS-FR	3	67	0.0447761194029851	ICGC	GRCh37
19:55790901	HSPBP1	protein_coding	2:120194652	TMEM37	protein_coding	LMS-FR	3	67	0.0447761194029851	ICGC	GRCh37
1:47904684	FOXD2-AS1	none protein_coding	2:120194651	TMEM37	protein_coding	LMS-FR	3	67	0.0447761194029851	ICGC	GRCh37
19:36258937	PROSER3	protein_coding	2:120194652	TMEM37	protein_coding	LMS-FR	3	67	0.0447761194029851	ICGC	GRCh37
11:3661589	ART5	protein_coding	2:120194652	TMEM37	protein_coding	LMS-FR	3	67	0.0447761194029851	ICGC	GRCh37
16:57847637	AC092118.1	none protein_coding	19:53454475	ZNF816	protein_coding	LMS-FR	3	67	0.0447761194029851	ICGC	GRCh37
15:93198684	FAM174B	protein_coding	5:76332468	AGGF1	protein_coding	THCA-CN	2	50	0.04	ICGC	GRCh37
17:77111772	RBFOX3	protein_coding	5:76332468	AGGF1	protein_coding	THCA-CN	2	50	0.04	ICGC	GRCh37
16:67876755	NUTF2	protein_coding	5:76332468	AGGF1	protein_coding	THCA-CN	2	50	0.04	ICGC	GRCh37
3:195507324	MUC4	protein_coding	5:76332468	AGGF1	protein_coding	THCA-CN	2	50	0.04	ICGC	GRCh37
15:65678318	IGDCC4	protein_coding	5:76332468	AGGF1	protein_coding	THCA-CN	2	50	0.04	ICGC	GRCh37
11:64032516	PLCB3	protein_coding	2:233271799	ALPG	protein_coding	THCA-CN	2	50	0.04	ICGC	GRCh37
18:24127012	KCTD1	protein_coding	2:233271799	ALPG	protein_coding	THCA-CN	2	50	0.04	ICGC	GRCh37
16:67876755	NUTF2	protein_coding	2:233271799	ALPG	protein_coding	THCA-CN	2	50	0.04	ICGC	GRCh37
1:201179068	IGFN1	protein_coding	2:233271799	ALPG	protein_coding	THCA-CN	2	50	0.04	ICGC	GRCh37
1:110026628	ATXN7L2	protein_coding	11:1016795	AP2A2	protein_coding	THCA-CN	2	50	0.04	ICGC	GRCh37
12:53207583	KRT4	protein_coding	7:140453136	BRAF	protein_coding	THCA-CN	2	50	0.04	ICGC	GRCh37
19:37252640	ZNF850	protein_coding	7:140453136	BRAF	protein_coding	THCA-CN	2	50	0.04	ICGC	GRCh37
17:8047048	PER1	protein_coding	7:140453136	BRAF	protein_coding	THCA-CN	2	50	0.04	ICGC	GRCh37
7:100550767	MUC3A	protein_coding	7:140453136	BRAF	protein_coding	THCA-CN	2	50	0.04	ICGC	GRCh37
3:184104344	CHRD	protein_coding	7:140453136	BRAF	protein_coding	THCA-CN	2	50	0.04	ICGC	GRCh37
19:50435876	NUP62	protein_coding	7:140453136	BRAF	protein_coding	THCA-CN	2	50	0.04	ICGC	GRCh37
16:776315	HAGHL	protein_coding	7:140453136	BRAF	protein_coding	THCA-CN	2	50	0.04	ICGC	GRCh37
22:40066873	CACNA1I	protein_coding	7:140453136	BRAF	protein_coding	THCA-CN	2	50	0.04	ICGC	GRCh37
20:33880040	FAM83C	protein_coding	7:140453136	BRAF	protein_coding	THCA-CN	2	50	0.04	ICGC	GRCh37
11:1016795	AP2A2	protein_coding	7:140453136	BRAF	protein_coding	THCA-CN	2	50	0.04	ICGC	GRCh37
15:82336400	MEX3B	protein_coding	7:140453136	BRAF	protein_coding	THCA-CN	2	50	0.04	ICGC	GRCh37
1:29557390	MECR	protein_coding	7:140453136	BRAF	protein_coding	THCA-CN	2	50	0.04	ICGC	GRCh37
1:110026628	ATXN7L2	protein_coding	7:140453136	BRAF	protein_coding	THCA-CN	2	50	0.04	ICGC	GRCh37
16:16481620	NPIPA7	protein_coding	7:140453136	BRAF	protein_coding	THCA-CN	2	50	0.04	ICGC	GRCh37
19:40719921	MAP3K10	protein_coding	7:140453136	BRAF	protein_coding	THCA-CN	2	50	0.04	ICGC	GRCh37
4:48559517	FRYL	protein_coding	7:140453136	BRAF	protein_coding	THCA-CN	2	50	0.04	ICGC	GRCh37
3:102181200	ZPLD1	protein_coding	7:140453136	BRAF	protein_coding	THCA-CN	2	50	0.04	ICGC	GRCh37
17:77111772	RBFOX3	protein_coding	22:40066873	CACNA1I	protein_coding	THCA-CN	2	50	0.04	ICGC	GRCh37
19:10935797	DNM2	protein_coding	22:40066873	CACNA1I	protein_coding	THCA-CN	2	50	0.04	ICGC	GRCh37
2:220422605	OBSL1	protein_coding	22:40066873	CACNA1I	protein_coding	THCA-CN	2	50	0.04	ICGC	GRCh37
19:40316422	DYRK1B	protein_coding	22:40066873	CACNA1I	protein_coding	THCA-CN	2	50	0.04	ICGC	GRCh37
17:48692787	CACNA1G	protein_coding	22:40066873	CACNA1I	protein_coding	THCA-CN	2	50	0.04	ICGC	GRCh37
1:110026628	ATXN7L2	protein_coding	22:40066873	CACNA1I	protein_coding	THCA-CN	2	50	0.04	ICGC	GRCh37
19:2248265	JSRP1	protein_coding	22:40066873	CACNA1I	protein_coding	THCA-CN	2	50	0.04	ICGC	GRCh37
19:40316422	DYRK1B	protein_coding	7:94139514	CASD1	protein_coding	THCA-CN	2	50	0.04	ICGC	GRCh37
5:140590211	PCDHB12	protein_coding	7:94139514	CASD1	protein_coding	THCA-CN	2	50	0.04	ICGC	GRCh37
6:127837125	SOGA3	protein_coding	7:94139514	CASD1	protein_coding	THCA-CN	2	50	0.04	ICGC	GRCh37
2:230914604	SLC16A14	protein_coding	7:94139514	CASD1	protein_coding	THCA-CN	2	50	0.04	ICGC	GRCh37
17:61512597	CYB561	protein_coding	7:94139514	CASD1	protein_coding	THCA-CN	2	50	0.04	ICGC	GRCh37
2:242011127	MTERF4	protein_coding	7:94139514	CASD1	protein_coding	THCA-CN	2	50	0.04	ICGC	GRCh37
7:140453136	BRAF	protein_coding	7:94139514	CASD1	protein_coding	THCA-CN	2	50	0.04	ICGC	GRCh37
19:2248265	JSRP1	protein_coding	7:94139514	CASD1	protein_coding	THCA-CN	2	50	0.04	ICGC	GRCh37
1:29557390	MECR	protein_coding	7:94139514	CASD1	protein_coding	THCA-CN	2	50	0.04	ICGC	GRCh37
15:65678318	IGDCC4	protein_coding	7:94139514	CASD1	protein_coding	THCA-CN	2	50	0.04	ICGC	GRCh37
15:82336406	MEX3B	protein_coding	7:94139514	CASD1	protein_coding	THCA-CN	2	50	0.04	ICGC	GRCh37
19:10935797	DNM2	protein_coding	7:94139514	CASD1	protein_coding	THCA-CN	2	50	0.04	ICGC	GRCh37
22:50617600	PANX2	protein_coding	7:94139514	CASD1	protein_coding	THCA-CN	2	50	0.04	ICGC	GRCh37
17:77111772	RBFOX3	protein_coding	17:7809271	CHD3	protein_coding	THCA-CN	2	50	0.04	ICGC	GRCh37
16:67876755	NUTF2	protein_coding	17:7809271	CHD3	protein_coding	THCA-CN	2	50	0.04	ICGC	GRCh37
17:61512597	CYB561	protein_coding	17:7809271	CHD3	protein_coding	THCA-CN	2	50	0.04	ICGC	GRCh37
16:776315	HAGHL	protein_coding	17:7809271	CHD3	protein_coding	THCA-CN	2	50	0.04	ICGC	GRCh37
17:72745164	RAB37	protein_coding	17:7809271	CHD3	protein_coding	THCA-CN	2	50	0.04	ICGC	GRCh37
2:242011127	MTERF4	protein_coding	3:184104344	CHRD	protein_coding	THCA-CN	2	50	0.04	ICGC	GRCh37
15:38776684	FAM98B	protein_coding	3:184104344	CHRD	protein_coding	THCA-CN	2	50	0.04	ICGC	GRCh37
1:27878416	AHDC1	protein_coding	3:184104344	CHRD	protein_coding	THCA-CN	2	50	0.04	ICGC	GRCh37
15:65678318	IGDCC4	protein_coding	3:184104344	CHRD	protein_coding	THCA-CN	2	50	0.04	ICGC	GRCh37
19:40316422	DYRK1B	protein_coding	3:184104344	CHRD	protein_coding	THCA-CN	2	50	0.04	ICGC	GRCh37
2:230914604	SLC16A14	protein_coding	3:184104344	CHRD	protein_coding	THCA-CN	2	50	0.04	ICGC	GRCh37
19:42596335	POU2F2	protein_coding	3:184104344	CHRD	protein_coding	THCA-CN	2	50	0.04	ICGC	GRCh37
16:776315	HAGHL	protein_coding	3:184104344	CHRD	protein_coding	THCA-CN	2	50	0.04	ICGC	GRCh37
17:48692787	CACNA1G	protein_coding	3:184104344	CHRD	protein_coding	THCA-CN	2	50	0.04	ICGC	GRCh37
19:10935797	DNM2	protein_coding	3:184104344	CHRD	protein_coding	THCA-CN	2	50	0.04	ICGC	GRCh37
15:65678318	IGDCC4	protein_coding	17:61512597	CYB561	protein_coding	THCA-CN	2	50	0.04	ICGC	GRCh37
16:29999266	TAOK2	protein_coding	17:61512597	CYB561	protein_coding	THCA-CN	2	50	0.04	ICGC	GRCh37
17:38975319	TMEM99	none protein_coding	17:61512597	CYB561	protein_coding	THCA-CN	2	50	0.04	ICGC	GRCh37
17:61512597	CYB561	protein_coding	5:10761137	DAP	protein_coding	THCA-CN	2	50	0.04	ICGC	GRCh37
22:40066873	CACNA1I	protein_coding	5:10761137	DAP	protein_coding	THCA-CN	2	50	0.04	ICGC	GRCh37
1:201179068	IGFN1	protein_coding	5:10761137	DAP	protein_coding	THCA-CN	2	50	0.04	ICGC	GRCh37
1:16903882	NBPF1	protein_coding	5:10761137	DAP	protein_coding	THCA-CN	2	50	0.04	ICGC	GRCh37
16:16481620	NPIPA7	protein_coding	5:10761137	DAP	protein_coding	THCA-CN	2	50	0.04	ICGC	GRCh37
15:38776684	FAM98B	protein_coding	5:10761137	DAP	protein_coding	THCA-CN	2	50	0.04	ICGC	GRCh37
19:40316422	DYRK1B	protein_coding	5:10761137	DAP	protein_coding	THCA-CN	2	50	0.04	ICGC	GRCh37
19:2248265	JSRP1	protein_coding	5:10761137	DAP	protein_coding	THCA-CN	2	50	0.04	ICGC	GRCh37
17:38975319	TMEM99	none protein_coding	5:10761137	DAP	protein_coding	THCA-CN	2	50	0.04	ICGC	GRCh37
17:72745164	RAB37	protein_coding	5:10761137	DAP	protein_coding	THCA-CN	2	50	0.04	ICGC	GRCh37
20:33880040	FAM83C	protein_coding	5:10761137	DAP	protein_coding	THCA-CN	2	50	0.04	ICGC	GRCh37
1:155580061	MSTO1	protein_coding	19:10935797	DNM2	protein_coding	THCA-CN	2	50	0.04	ICGC	GRCh37
10:88476170	LDB3	protein_coding	19:10935797	DNM2	protein_coding	THCA-CN	2	50	0.04	ICGC	GRCh37
16:776315	HAGHL	protein_coding	19:10935797	DNM2	protein_coding	THCA-CN	2	50	0.04	ICGC	GRCh37
17:61512597	CYB561	protein_coding	19:10935797	DNM2	protein_coding	THCA-CN	2	50	0.04	ICGC	GRCh37
1:29557390	MECR	protein_coding	19:10935797	DNM2	protein_coding	THCA-CN	2	50	0.04	ICGC	GRCh37
15:82336406	MEX3B	protein_coding	19:10935797	DNM2	protein_coding	THCA-CN	2	50	0.04	ICGC	GRCh37
5:10761137	DAP	protein_coding	9:463655	DOCK8	protein_coding	THCA-CN	2	50	0.04	ICGC	GRCh37
6:83892687	PGM3	protein_coding	9:463655	DOCK8	protein_coding	THCA-CN	2	50	0.04	ICGC	GRCh37
1:29557390	MECR	protein_coding	9:463655	DOCK8	protein_coding	THCA-CN	2	50	0.04	ICGC	GRCh37
16:776315	HAGHL	protein_coding	9:463655	DOCK8	protein_coding	THCA-CN	2	50	0.04	ICGC	GRCh37
7:5413839	TNRC18	protein_coding	9:463655	DOCK8	protein_coding	THCA-CN	2	50	0.04	ICGC	GRCh37
1:161642774	FCGR2B	protein_coding	9:463655	DOCK8	protein_coding	THCA-CN	2	50	0.04	ICGC	GRCh37
1:110026628	ATXN7L2	protein_coding	9:463655	DOCK8	protein_coding	THCA-CN	2	50	0.04	ICGC	GRCh37
2:230914604	SLC16A14	protein_coding	9:463655	DOCK8	protein_coding	THCA-CN	2	50	0.04	ICGC	GRCh37
6:127837125	SOGA3	protein_coding	9:463655	DOCK8	protein_coding	THCA-CN	2	50	0.04	ICGC	GRCh37
17:8047048	PER1	protein_coding	9:463655	DOCK8	protein_coding	THCA-CN	2	50	0.04	ICGC	GRCh37
6:150263287	ULBP2	protein_coding	9:463655	DOCK8	protein_coding	THCA-CN	2	50	0.04	ICGC	GRCh37
22:40066873	CACNA1I	protein_coding	9:463655	DOCK8	protein_coding	THCA-CN	2	50	0.04	ICGC	GRCh37
20:33880040	FAM83C	protein_coding	9:463655	DOCK8	protein_coding	THCA-CN	2	50	0.04	ICGC	GRCh37
7:20198700	MACC1	protein_coding	9:463655	DOCK8	protein_coding	THCA-CN	2	50	0.04	ICGC	GRCh37
15:82336406	MEX3B	protein_coding	3:75714807	DUX4L26	none protein_coding	THCA-CN	2	50	0.04	ICGC	GRCh37
20:33880040	FAM83C	protein_coding	3:75714807	DUX4L26	none protein_coding	THCA-CN	2	50	0.04	ICGC	GRCh37
15:38776684	FAM98B	protein_coding	3:75714807	DUX4L26	none protein_coding	THCA-CN	2	50	0.04	ICGC	GRCh37
20:18477732	RBBP9	protein_coding	3:75714807	DUX4L26	none protein_coding	THCA-CN	2	50	0.04	ICGC	GRCh37
17:48692787	CACNA1G	protein_coding	3:75714807	DUX4L26	none protein_coding	THCA-CN	2	50	0.04	ICGC	GRCh37
1:201179068	IGFN1	protein_coding	3:75714807	DUX4L26	none protein_coding	THCA-CN	2	50	0.04	ICGC	GRCh37
1:161642774	FCGR2B	protein_coding	3:75714807	DUX4L26	none protein_coding	THCA-CN	2	50	0.04	ICGC	GRCh37
17:77111772	RBFOX3	protein_coding	3:75714807	DUX4L26	none protein_coding	THCA-CN	2	50	0.04	ICGC	GRCh37
2:230914604	SLC16A14	protein_coding	3:75714807	DUX4L26	none protein_coding	THCA-CN	2	50	0.04	ICGC	GRCh37
19:10935797	DNM2	protein_coding	3:75714807	DUX4L26	none protein_coding	THCA-CN	2	50	0.04	ICGC	GRCh37
17:7809271	CHD3	protein_coding	3:75714807	DUX4L26	none protein_coding	THCA-CN	2	50	0.04	ICGC	GRCh37
10:88476170	LDB3	protein_coding	3:75714807	DUX4L26	none protein_coding	THCA-CN	2	50	0.04	ICGC	GRCh37
15:65678318	IGDCC4	protein_coding	3:75714807	DUX4L26	none protein_coding	THCA-CN	2	50	0.04	ICGC	GRCh37
3:184104344	CHRD	protein_coding	3:75714807	DUX4L26	none protein_coding	THCA-CN	2	50	0.04	ICGC	GRCh37
15:82336406	MEX3B	protein_coding	19:40316422	DYRK1B	protein_coding	THCA-CN	2	50	0.04	ICGC	GRCh37
18:24127012	KCTD1	protein_coding	19:40316422	DYRK1B	protein_coding	THCA-CN	2	50	0.04	ICGC	GRCh37
17:8047048	PER1	protein_coding	19:40316422	DYRK1B	protein_coding	THCA-CN	2	50	0.04	ICGC	GRCh37
15:82336400	MEX3B	protein_coding	19:40316422	DYRK1B	protein_coding	THCA-CN	2	50	0.04	ICGC	GRCh37
17:72745164	RAB37	protein_coding	19:40316422	DYRK1B	protein_coding	THCA-CN	2	50	0.04	ICGC	GRCh37
1:16903882	NBPF1	protein_coding	19:40316422	DYRK1B	protein_coding	THCA-CN	2	50	0.04	ICGC	GRCh37
16:16481620	NPIPA7	protein_coding	19:40316422	DYRK1B	protein_coding	THCA-CN	2	50	0.04	ICGC	GRCh37
1:16894523	NBPF1	protein_coding	15:93198684	FAM174B	protein_coding	THCA-CN	2	50	0.04	ICGC	GRCh37
1:110026628	ATXN7L2	protein_coding	20:33880040	FAM83C	protein_coding	THCA-CN	2	50	0.04	ICGC	GRCh37
16:67876755	NUTF2	protein_coding	20:33880040	FAM83C	protein_coding	THCA-CN	2	50	0.04	ICGC	GRCh37
1:161642774	FCGR2B	protein_coding	20:33880040	FAM83C	protein_coding	THCA-CN	2	50	0.04	ICGC	GRCh37
17:7809271	CHD3	protein_coding	20:33880040	FAM83C	protein_coding	THCA-CN	2	50	0.04	ICGC	GRCh37
11:64032516	PLCB3	protein_coding	20:33880040	FAM83C	protein_coding	THCA-CN	2	50	0.04	ICGC	GRCh37
17:8047048	PER1	protein_coding	20:33880040	FAM83C	protein_coding	THCA-CN	2	50	0.04	ICGC	GRCh37
15:82336406	MEX3B	protein_coding	20:33880040	FAM83C	protein_coding	THCA-CN	2	50	0.04	ICGC	GRCh37
17:77111772	RBFOX3	protein_coding	20:33880040	FAM83C	protein_coding	THCA-CN	2	50	0.04	ICGC	GRCh37
10:88476170	LDB3	protein_coding	20:33880040	FAM83C	protein_coding	THCA-CN	2	50	0.04	ICGC	GRCh37
18:24127012	KCTD1	protein_coding	20:33880040	FAM83C	protein_coding	THCA-CN	2	50	0.04	ICGC	GRCh37
19:2248265	JSRP1	protein_coding	20:33880040	FAM83C	protein_coding	THCA-CN	2	50	0.04	ICGC	GRCh37
15:38776684	FAM98B	protein_coding	20:33880040	FAM83C	protein_coding	THCA-CN	2	50	0.04	ICGC	GRCh37
1:29557390	MECR	protein_coding	20:33880040	FAM83C	protein_coding	THCA-CN	2	50	0.04	ICGC	GRCh37
4:48559517	FRYL	protein_coding	9:70177269	FOXD4L5	protein_coding	THCA-CN	2	50	0.04	ICGC	GRCh37
7:5413839	TNRC18	protein_coding	9:70177269	FOXD4L5	protein_coding	THCA-CN	2	50	0.04	ICGC	GRCh37
5:10761137	DAP	protein_coding	9:70177269	FOXD4L5	protein_coding	THCA-CN	2	50	0.04	ICGC	GRCh37
6:10410472	TFAP2A	protein_coding	9:70177269	FOXD4L5	protein_coding	THCA-CN	2	50	0.04	ICGC	GRCh37
17:48692787	CACNA1G	protein_coding	9:70177269	FOXD4L5	protein_coding	THCA-CN	2	50	0.04	ICGC	GRCh37
6:83892687	PGM3	protein_coding	9:70177269	FOXD4L5	protein_coding	THCA-CN	2	50	0.04	ICGC	GRCh37
7:20198700	MACC1	protein_coding	9:70177269	FOXD4L5	protein_coding	THCA-CN	2	50	0.04	ICGC	GRCh37
6:150263287	ULBP2	protein_coding	9:70177269	FOXD4L5	protein_coding	THCA-CN	2	50	0.04	ICGC	GRCh37
3:75714807	DUX4L26	none protein_coding	9:70177269	FOXD4L5	protein_coding	THCA-CN	2	50	0.04	ICGC	GRCh37
3:184104344	CHRD	protein_coding	9:70177269	FOXD4L5	protein_coding	THCA-CN	2	50	0.04	ICGC	GRCh37
17:7809271	CHD3	protein_coding	9:70177269	FOXD4L5	protein_coding	THCA-CN	2	50	0.04	ICGC	GRCh37
19:2248265	JSRP1	protein_coding	9:70177269	FOXD4L5	protein_coding	THCA-CN	2	50	0.04	ICGC	GRCh37
1:29557390	MECR	protein_coding	9:70177269	FOXD4L5	protein_coding	THCA-CN	2	50	0.04	ICGC	GRCh37
9:139417464	NOTCH1	protein_coding	9:70177269	FOXD4L5	protein_coding	THCA-CN	2	50	0.04	ICGC	GRCh37
1:161642774	FCGR2B	protein_coding	9:70177269	FOXD4L5	protein_coding	THCA-CN	2	50	0.04	ICGC	GRCh37
22:40066873	CACNA1I	protein_coding	9:70177269	FOXD4L5	protein_coding	THCA-CN	2	50	0.04	ICGC	GRCh37
22:50617600	PANX2	protein_coding	9:70177269	FOXD4L5	protein_coding	THCA-CN	2	50	0.04	ICGC	GRCh37
1:27878416	AHDC1	protein_coding	9:70177269	FOXD4L5	protein_coding	THCA-CN	2	50	0.04	ICGC	GRCh37
16:67876755	NUTF2	protein_coding	9:70177269	FOXD4L5	protein_coding	THCA-CN	2	50	0.04	ICGC	GRCh37
8:17014282	ZDHHC2	protein_coding	9:70177269	FOXD4L5	protein_coding	THCA-CN	2	50	0.04	ICGC	GRCh37
15:65678318	IGDCC4	protein_coding	4:48559517	FRYL	protein_coding	THCA-CN	2	50	0.04	ICGC	GRCh37
20:18477732	RBBP9	protein_coding	4:48559517	FRYL	protein_coding	THCA-CN	2	50	0.04	ICGC	GRCh37
17:61512597	CYB561	protein_coding	4:48559517	FRYL	protein_coding	THCA-CN	2	50	0.04	ICGC	GRCh37
16:776315	HAGHL	protein_coding	4:48559517	FRYL	protein_coding	THCA-CN	2	50	0.04	ICGC	GRCh37
19:10935797	DNM2	protein_coding	4:48559517	FRYL	protein_coding	THCA-CN	2	50	0.04	ICGC	GRCh37
3:102181200	ZPLD1	protein_coding	4:48559517	FRYL	protein_coding	THCA-CN	2	50	0.04	ICGC	GRCh37
17:7809271	CHD3	protein_coding	4:48559517	FRYL	protein_coding	THCA-CN	2	50	0.04	ICGC	GRCh37
3:184104344	CHRD	protein_coding	4:48559517	FRYL	protein_coding	THCA-CN	2	50	0.04	ICGC	GRCh37
2:242011127	MTERF4	protein_coding	4:48559517	FRYL	protein_coding	THCA-CN	2	50	0.04	ICGC	GRCh37
19:2248265	JSRP1	protein_coding	4:48559517	FRYL	protein_coding	THCA-CN	2	50	0.04	ICGC	GRCh37
16:67876755	NUTF2	protein_coding	16:776315	HAGHL	protein_coding	THCA-CN	2	50	0.04	ICGC	GRCh37
1:27878416	AHDC1	protein_coding	16:776315	HAGHL	protein_coding	THCA-CN	2	50	0.04	ICGC	GRCh37
11:64032516	PLCB3	protein_coding	4:8869661	HMX1	protein_coding	THCA-CN	2	50	0.04	ICGC	GRCh37
1:16903882	NBPF1	protein_coding	4:8869661	HMX1	protein_coding	THCA-CN	2	50	0.04	ICGC	GRCh37
22:40066873	CACNA1I	protein_coding	4:8869661	HMX1	protein_coding	THCA-CN	2	50	0.04	ICGC	GRCh37
4:48559517	FRYL	protein_coding	4:8869661	HMX1	protein_coding	THCA-CN	2	50	0.04	ICGC	GRCh37
17:72745164	RAB37	protein_coding	4:8869661	HMX1	protein_coding	THCA-CN	2	50	0.04	ICGC	GRCh37
2:230914604	SLC16A14	protein_coding	4:8869661	HMX1	protein_coding	THCA-CN	2	50	0.04	ICGC	GRCh37
11:114421857	NXPE1	protein_coding	15:65678318	IGDCC4	protein_coding	THCA-CN	2	50	0.04	ICGC	GRCh37
11:64032516	PLCB3	protein_coding	15:65678318	IGDCC4	protein_coding	THCA-CN	2	50	0.04	ICGC	GRCh37
1:16894523	NBPF1	protein_coding	1:201179068	IGFN1	protein_coding	THCA-CN	2	50	0.04	ICGC	GRCh37
11:64032516	PLCB3	protein_coding	1:201179068	IGFN1	protein_coding	THCA-CN	2	50	0.04	ICGC	GRCh37
17:7809271	CHD3	protein_coding	19:2248265	JSRP1	protein_coding	THCA-CN	2	50	0.04	ICGC	GRCh37
1:27878416	AHDC1	protein_coding	19:2248265	JSRP1	protein_coding	THCA-CN	2	50	0.04	ICGC	GRCh37
15:82336406	MEX3B	protein_coding	19:2248265	JSRP1	protein_coding	THCA-CN	2	50	0.04	ICGC	GRCh37
17:48692787	CACNA1G	protein_coding	19:2248265	JSRP1	protein_coding	THCA-CN	2	50	0.04	ICGC	GRCh37
18:24127012	KCTD1	protein_coding	19:2248265	JSRP1	protein_coding	THCA-CN	2	50	0.04	ICGC	GRCh37
16:29999266	TAOK2	protein_coding	19:2248265	JSRP1	protein_coding	THCA-CN	2	50	0.04	ICGC	GRCh37
17:38975319	TMEM99	none protein_coding	19:2248265	JSRP1	protein_coding	THCA-CN	2	50	0.04	ICGC	GRCh37
11:64032516	PLCB3	protein_coding	19:2248265	JSRP1	protein_coding	THCA-CN	2	50	0.04	ICGC	GRCh37
15:82336400	MEX3B	protein_coding	19:2248265	JSRP1	protein_coding	THCA-CN	2	50	0.04	ICGC	GRCh37
17:61512597	CYB561	protein_coding	19:2248265	JSRP1	protein_coding	THCA-CN	2	50	0.04	ICGC	GRCh37
1:201179068	IGFN1	protein_coding	19:2248265	JSRP1	protein_coding	THCA-CN	2	50	0.04	ICGC	GRCh37
15:82336406	MEX3B	protein_coding	18:24127012	KCTD1	protein_coding	THCA-CN	2	50	0.04	ICGC	GRCh37
16:29999266	TAOK2	protein_coding	18:24127012	KCTD1	protein_coding	THCA-CN	2	50	0.04	ICGC	GRCh37
1:201179068	IGFN1	protein_coding	18:24127012	KCTD1	protein_coding	THCA-CN	2	50	0.04	ICGC	GRCh37
15:65678318	IGDCC4	protein_coding	18:24127012	KCTD1	protein_coding	THCA-CN	2	50	0.04	ICGC	GRCh37
17:38975319	TMEM99	none protein_coding	18:24127012	KCTD1	protein_coding	THCA-CN	2	50	0.04	ICGC	GRCh37
16:776315	HAGHL	protein_coding	18:24127012	KCTD1	protein_coding	THCA-CN	2	50	0.04	ICGC	GRCh37
1:16903882	NBPF1	protein_coding	12:53207583	KRT4	protein_coding	THCA-CN	2	50	0.04	ICGC	GRCh37
22:40066873	CACNA1I	protein_coding	7:20198700	MACC1	protein_coding	THCA-CN	2	50	0.04	ICGC	GRCh37
6:10410466	TFAP2A	protein_coding	7:20198700	MACC1	protein_coding	THCA-CN	2	50	0.04	ICGC	GRCh37
16:29999266	TAOK2	protein_coding	7:20198700	MACC1	protein_coding	THCA-CN	2	50	0.04	ICGC	GRCh37
17:61512597	CYB561	protein_coding	7:20198700	MACC1	protein_coding	THCA-CN	2	50	0.04	ICGC	GRCh37
1:27878416	AHDC1	protein_coding	7:20198700	MACC1	protein_coding	THCA-CN	2	50	0.04	ICGC	GRCh37
7:140453136	BRAF	protein_coding	7:20198700	MACC1	protein_coding	THCA-CN	2	50	0.04	ICGC	GRCh37
3:75714807	DUX4L26	none protein_coding	7:20198700	MACC1	protein_coding	THCA-CN	2	50	0.04	ICGC	GRCh37
17:72745164	RAB37	protein_coding	7:20198700	MACC1	protein_coding	THCA-CN	2	50	0.04	ICGC	GRCh37
1:110026628	ATXN7L2	protein_coding	7:20198700	MACC1	protein_coding	THCA-CN	2	50	0.04	ICGC	GRCh37
2:242011127	MTERF4	protein_coding	7:20198700	MACC1	protein_coding	THCA-CN	2	50	0.04	ICGC	GRCh37
15:65678318	IGDCC4	protein_coding	7:20198700	MACC1	protein_coding	THCA-CN	2	50	0.04	ICGC	GRCh37
19:10935797	DNM2	protein_coding	7:20198700	MACC1	protein_coding	THCA-CN	2	50	0.04	ICGC	GRCh37
19:42596335	POU2F2	protein_coding	5:71490955	MAP1B	protein_coding	THCA-CN	2	50	0.04	ICGC	GRCh37
15:38776684	FAM98B	protein_coding	5:71490955	MAP1B	protein_coding	THCA-CN	2	50	0.04	ICGC	GRCh37
17:77111772	RBFOX3	protein_coding	5:71490955	MAP1B	protein_coding	THCA-CN	2	50	0.04	ICGC	GRCh37
3:102181200	ZPLD1	protein_coding	5:71490955	MAP1B	protein_coding	THCA-CN	2	50	0.04	ICGC	GRCh37
22:40066873	CACNA1I	protein_coding	5:71490955	MAP1B	protein_coding	THCA-CN	2	50	0.04	ICGC	GRCh37
17:72745164	RAB37	protein_coding	5:71490955	MAP1B	protein_coding	THCA-CN	2	50	0.04	ICGC	GRCh37
16:776315	HAGHL	protein_coding	5:71490955	MAP1B	protein_coding	THCA-CN	2	50	0.04	ICGC	GRCh37
1:110026628	ATXN7L2	protein_coding	5:71490955	MAP1B	protein_coding	THCA-CN	2	50	0.04	ICGC	GRCh37
19:50435876	NUP62	protein_coding	5:71490955	MAP1B	protein_coding	THCA-CN	2	50	0.04	ICGC	GRCh37
1:29557390	MECR	protein_coding	5:71490955	MAP1B	protein_coding	THCA-CN	2	50	0.04	ICGC	GRCh37
11:114421857	NXPE1	protein_coding	17:21207813	MAP2K3	protein_coding	THCA-CN	2	50	0.04	ICGC	GRCh37
1:16903882	NBPF1	protein_coding	17:21207813	MAP2K3	protein_coding	THCA-CN	2	50	0.04	ICGC	GRCh37
1:155580061	MSTO1	protein_coding	17:21207813	MAP2K3	protein_coding	THCA-CN	2	50	0.04	ICGC	GRCh37
15:93198684	FAM174B	protein_coding	17:21207813	MAP2K3	protein_coding	THCA-CN	2	50	0.04	ICGC	GRCh37
1:16894523	NBPF1	protein_coding	19:40719921	MAP3K10	protein_coding	THCA-CN	2	50	0.04	ICGC	GRCh37
19:37252640	ZNF850	protein_coding	19:40719921	MAP3K10	protein_coding	THCA-CN	2	50	0.04	ICGC	GRCh37
1:201179068	IGFN1	protein_coding	1:29557390	MECR	protein_coding	THCA-CN	2	50	0.04	ICGC	GRCh37
1:110026628	ATXN7L2	protein_coding	1:29557390	MECR	protein_coding	THCA-CN	2	50	0.04	ICGC	GRCh37
15:65678318	IGDCC4	protein_coding	15:82336400	MEX3B	protein_coding	THCA-CN	2	50	0.04	ICGC	GRCh37
15:65678318	IGDCC4	protein_coding	15:82336406	MEX3B	protein_coding	THCA-CN	2	50	0.04	ICGC	GRCh37
10:88476170	LDB3	protein_coding	15:82336406	MEX3B	protein_coding	THCA-CN	2	50	0.04	ICGC	GRCh37
1:201179068	IGFN1	protein_coding	15:82336406	MEX3B	protein_coding	THCA-CN	2	50	0.04	ICGC	GRCh37
1:29557390	MECR	protein_coding	15:82336400	MEX3B	protein_coding	THCA-CN	2	50	0.04	ICGC	GRCh37
1:27878416	AHDC1	protein_coding	15:82336400	MEX3B	protein_coding	THCA-CN	2	50	0.04	ICGC	GRCh37
1:29557390	MECR	protein_coding	15:82336406	MEX3B	protein_coding	THCA-CN	2	50	0.04	ICGC	GRCh37
11:64032516	PLCB3	protein_coding	15:82336400	MEX3B	protein_coding	THCA-CN	2	50	0.04	ICGC	GRCh37
11:64032516	PLCB3	protein_coding	15:82336406	MEX3B	protein_coding	THCA-CN	2	50	0.04	ICGC	GRCh37
15:65678318	IGDCC4	protein_coding	7:73011743	MLXIPL	protein_coding	THCA-CN	2	50	0.04	ICGC	GRCh37
3:195507324	MUC4	protein_coding	7:73011743	MLXIPL	protein_coding	THCA-CN	2	50	0.04	ICGC	GRCh37
17:61512597	CYB561	protein_coding	2:242011127	MTERF4	protein_coding	THCA-CN	2	50	0.04	ICGC	GRCh37
17:7386234	ZBTB4	protein_coding	2:242011127	MTERF4	protein_coding	THCA-CN	2	50	0.04	ICGC	GRCh37
19:10935797	DNM2	protein_coding	2:242011127	MTERF4	protein_coding	THCA-CN	2	50	0.04	ICGC	GRCh37
1:27878416	AHDC1	protein_coding	2:242011127	MTERF4	protein_coding	THCA-CN	2	50	0.04	ICGC	GRCh37
16:776315	HAGHL	protein_coding	2:242011127	MTERF4	protein_coding	THCA-CN	2	50	0.04	ICGC	GRCh37
19:50435876	NUP62	protein_coding	2:242011127	MTERF4	protein_coding	THCA-CN	2	50	0.04	ICGC	GRCh37
1:161642774	FCGR2B	protein_coding	2:242011127	MTERF4	protein_coding	THCA-CN	2	50	0.04	ICGC	GRCh37
19:2248265	JSRP1	protein_coding	2:242011127	MTERF4	protein_coding	THCA-CN	2	50	0.04	ICGC	GRCh37
15:82336406	MEX3B	protein_coding	2:242011127	MTERF4	protein_coding	THCA-CN	2	50	0.04	ICGC	GRCh37
17:48692787	CACNA1G	protein_coding	2:242011127	MTERF4	protein_coding	THCA-CN	2	50	0.04	ICGC	GRCh37
17:72745164	RAB37	protein_coding	2:242011127	MTERF4	protein_coding	THCA-CN	2	50	0.04	ICGC	GRCh37
15:65678318	IGDCC4	protein_coding	2:242011127	MTERF4	protein_coding	THCA-CN	2	50	0.04	ICGC	GRCh37
12:53207583	KRT4	protein_coding	7:100550767	MUC3A	protein_coding	THCA-CN	2	50	0.04	ICGC	GRCh37
17:21207813	MAP2K3	protein_coding	7:100550767	MUC3A	protein_coding	THCA-CN	2	50	0.04	ICGC	GRCh37
1:16903882	NBPF1	protein_coding	7:100550767	MUC3A	protein_coding	THCA-CN	2	50	0.04	ICGC	GRCh37
16:67876755	NUTF2	protein_coding	3:195507324	MUC4	protein_coding	THCA-CN	2	50	0.04	ICGC	GRCh37
17:7386234	ZBTB4	protein_coding	3:195507324	MUC4	protein_coding	THCA-CN	2	50	0.04	ICGC	GRCh37
12:50745822	FAM186A	protein_coding	3:195507324	MUC4	protein_coding	THCA-CN	2	50	0.04	ICGC	GRCh37
1:155580061	MSTO1	protein_coding	1:16894523	NBPF1	protein_coding	THCA-CN	2	50	0.04	ICGC	GRCh37
11:114421857	NXPE1	protein_coding	1:16894523	NBPF1	protein_coding	THCA-CN	2	50	0.04	ICGC	GRCh37
1:155580061	MSTO1	protein_coding	1:16903882	NBPF1	protein_coding	THCA-CN	2	50	0.04	ICGC	GRCh37
11:64032516	PLCB3	protein_coding	1:16903882	NBPF1	protein_coding	THCA-CN	2	50	0.04	ICGC	GRCh37
6:83892687	PGM3	protein_coding	9:139417464	NOTCH1	protein_coding	THCA-CN	2	50	0.04	ICGC	GRCh37
7:20198700	MACC1	protein_coding	9:139417464	NOTCH1	protein_coding	THCA-CN	2	50	0.04	ICGC	GRCh37
15:82336400	MEX3B	protein_coding	9:139417464	NOTCH1	protein_coding	THCA-CN	2	50	0.04	ICGC	GRCh37
8:17014282	ZDHHC2	protein_coding	9:139417464	NOTCH1	protein_coding	THCA-CN	2	50	0.04	ICGC	GRCh37
1:110026628	ATXN7L2	protein_coding	9:139417464	NOTCH1	protein_coding	THCA-CN	2	50	0.04	ICGC	GRCh37
17:7809271	CHD3	protein_coding	9:139417464	NOTCH1	protein_coding	THCA-CN	2	50	0.04	ICGC	GRCh37
1:16903882	NBPF1	protein_coding	16:16481620	NPIPA7	protein_coding	THCA-CN	2	50	0.04	ICGC	GRCh37
10:88476170	LDB3	protein_coding	19:50435876	NUP62	protein_coding	THCA-CN	2	50	0.04	ICGC	GRCh37
19:10935797	DNM2	protein_coding	19:50435876	NUP62	protein_coding	THCA-CN	2	50	0.04	ICGC	GRCh37
17:77111772	RBFOX3	protein_coding	19:50435876	NUP62	protein_coding	THCA-CN	2	50	0.04	ICGC	GRCh37
16:776315	HAGHL	protein_coding	19:50435876	NUP62	protein_coding	THCA-CN	2	50	0.04	ICGC	GRCh37
15:65678318	IGDCC4	protein_coding	19:50435876	NUP62	protein_coding	THCA-CN	2	50	0.04	ICGC	GRCh37
17:48692787	CACNA1G	protein_coding	19:50435876	NUP62	protein_coding	THCA-CN	2	50	0.04	ICGC	GRCh37
1:161642774	FCGR2B	protein_coding	19:50435876	NUP62	protein_coding	THCA-CN	2	50	0.04	ICGC	GRCh37
17:72745164	RAB37	protein_coding	19:50435876	NUP62	protein_coding	THCA-CN	2	50	0.04	ICGC	GRCh37
11:64032516	PLCB3	protein_coding	19:50435876	NUP62	protein_coding	THCA-CN	2	50	0.04	ICGC	GRCh37
17:7809271	CHD3	protein_coding	19:50435876	NUP62	protein_coding	THCA-CN	2	50	0.04	ICGC	GRCh37
15:82336400	MEX3B	protein_coding	19:50435876	NUP62	protein_coding	THCA-CN	2	50	0.04	ICGC	GRCh37
15:38776684	FAM98B	protein_coding	16:67876755	NUTF2	protein_coding	THCA-CN	2	50	0.04	ICGC	GRCh37
11:64032516	PLCB3	protein_coding	16:67876755	NUTF2	protein_coding	THCA-CN	2	50	0.04	ICGC	GRCh37
15:82336400	MEX3B	protein_coding	16:67876755	NUTF2	protein_coding	THCA-CN	2	50	0.04	ICGC	GRCh37
12:53207583	KRT4	protein_coding	16:67876755	NUTF2	protein_coding	THCA-CN	2	50	0.04	ICGC	GRCh37
1:161642774	FCGR2B	protein_coding	16:67876755	NUTF2	protein_coding	THCA-CN	2	50	0.04	ICGC	GRCh37
1:110026628	ATXN7L2	protein_coding	16:67876755	NUTF2	protein_coding	THCA-CN	2	50	0.04	ICGC	GRCh37
1:27878416	AHDC1	protein_coding	16:67876755	NUTF2	protein_coding	THCA-CN	2	50	0.04	ICGC	GRCh37
1:16894523	NBPF1	protein_coding	9:97080947	NUTM2F	protein_coding	THCA-CN	2	50	0.04	ICGC	GRCh37
17:7386234	ZBTB4	protein_coding	9:97080947	NUTM2F	protein_coding	THCA-CN	2	50	0.04	ICGC	GRCh37
12:53207583	KRT4	protein_coding	9:97080947	NUTM2F	protein_coding	THCA-CN	2	50	0.04	ICGC	GRCh37
1:201179068	IGFN1	protein_coding	9:97080947	NUTM2F	protein_coding	THCA-CN	2	50	0.04	ICGC	GRCh37
17:77111772	RBFOX3	protein_coding	2:220422605	OBSL1	protein_coding	THCA-CN	2	50	0.04	ICGC	GRCh37
17:38975319	TMEM99	none protein_coding	2:220422605	OBSL1	protein_coding	THCA-CN	2	50	0.04	ICGC	GRCh37
19:42596335	POU2F2	protein_coding	2:220422605	OBSL1	protein_coding	THCA-CN	2	50	0.04	ICGC	GRCh37
16:776315	HAGHL	protein_coding	2:220422605	OBSL1	protein_coding	THCA-CN	2	50	0.04	ICGC	GRCh37
10:88476170	LDB3	protein_coding	2:220422605	OBSL1	protein_coding	THCA-CN	2	50	0.04	ICGC	GRCh37
1:110026628	ATXN7L2	protein_coding	2:220422605	OBSL1	protein_coding	THCA-CN	2	50	0.04	ICGC	GRCh37
19:10935797	DNM2	protein_coding	2:220422605	OBSL1	protein_coding	THCA-CN	2	50	0.04	ICGC	GRCh37
19:50435876	NUP62	protein_coding	2:220422605	OBSL1	protein_coding	THCA-CN	2	50	0.04	ICGC	GRCh37
17:7386234	ZBTB4	protein_coding	19:9324835	OR7D4	protein_coding	THCA-CN	2	50	0.04	ICGC	GRCh37
19:37252640	ZNF850	protein_coding	8:101730073	PABPC1	protein_coding	THCA-CN	2	50	0.04	ICGC	GRCh37
1:16894523	NBPF1	protein_coding	8:101730073	PABPC1	protein_coding	THCA-CN	2	50	0.04	ICGC	GRCh37
19:40719921	MAP3K10	protein_coding	8:101730073	PABPC1	protein_coding	THCA-CN	2	50	0.04	ICGC	GRCh37
3:195507324	MUC4	protein_coding	8:101730073	PABPC1	protein_coding	THCA-CN	2	50	0.04	ICGC	GRCh37
11:114421857	NXPE1	protein_coding	8:101730073	PABPC1	protein_coding	THCA-CN	2	50	0.04	ICGC	GRCh37
7:73011743	MLXIPL	protein_coding	8:101730073	PABPC1	protein_coding	THCA-CN	2	50	0.04	ICGC	GRCh37
2:220422605	OBSL1	protein_coding	22:50617600	PANX2	protein_coding	THCA-CN	2	50	0.04	ICGC	GRCh37
16:67876755	NUTF2	protein_coding	22:50617600	PANX2	protein_coding	THCA-CN	2	50	0.04	ICGC	GRCh37
1:27878416	AHDC1	protein_coding	22:50617600	PANX2	protein_coding	THCA-CN	2	50	0.04	ICGC	GRCh37
1:110026628	ATXN7L2	protein_coding	22:50617600	PANX2	protein_coding	THCA-CN	2	50	0.04	ICGC	GRCh37
16:776315	HAGHL	protein_coding	22:50617600	PANX2	protein_coding	THCA-CN	2	50	0.04	ICGC	GRCh37
20:33880040	FAM83C	protein_coding	5:140590211	PCDHB12	protein_coding	THCA-CN	2	50	0.04	ICGC	GRCh37
11:64032516	PLCB3	protein_coding	5:140590211	PCDHB12	protein_coding	THCA-CN	2	50	0.04	ICGC	GRCh37
17:8047048	PER1	protein_coding	5:140590211	PCDHB12	protein_coding	THCA-CN	2	50	0.04	ICGC	GRCh37
16:776315	HAGHL	protein_coding	5:140590211	PCDHB12	protein_coding	THCA-CN	2	50	0.04	ICGC	GRCh37
15:82336406	MEX3B	protein_coding	5:140590211	PCDHB12	protein_coding	THCA-CN	2	50	0.04	ICGC	GRCh37
19:40316422	DYRK1B	protein_coding	5:140590211	PCDHB12	protein_coding	THCA-CN	2	50	0.04	ICGC	GRCh37
1:201179068	IGFN1	protein_coding	5:140590211	PCDHB12	protein_coding	THCA-CN	2	50	0.04	ICGC	GRCh37
2:230914604	SLC16A14	protein_coding	8:52733079	PCMTD1	protein_coding	THCA-CN	2	50	0.04	ICGC	GRCh37
17:7809271	CHD3	protein_coding	8:52733079	PCMTD1	protein_coding	THCA-CN	2	50	0.04	ICGC	GRCh37
1:29557390	MECR	protein_coding	8:52733079	PCMTD1	protein_coding	THCA-CN	2	50	0.04	ICGC	GRCh37
3:102181200	ZPLD1	protein_coding	8:52733079	PCMTD1	protein_coding	THCA-CN	2	50	0.04	ICGC	GRCh37
19:2248265	JSRP1	protein_coding	8:52733079	PCMTD1	protein_coding	THCA-CN	2	50	0.04	ICGC	GRCh37
7:20198700	MACC1	protein_coding	8:52733079	PCMTD1	protein_coding	THCA-CN	2	50	0.04	ICGC	GRCh37
17:38975319	TMEM99	none protein_coding	8:52733079	PCMTD1	protein_coding	THCA-CN	2	50	0.04	ICGC	GRCh37
6:150263287	ULBP2	protein_coding	8:52733079	PCMTD1	protein_coding	THCA-CN	2	50	0.04	ICGC	GRCh37
6:10410466	TFAP2A	protein_coding	8:52733079	PCMTD1	protein_coding	THCA-CN	2	50	0.04	ICGC	GRCh37
8:17014282	ZDHHC2	protein_coding	8:52733079	PCMTD1	protein_coding	THCA-CN	2	50	0.04	ICGC	GRCh37
6:83892687	PGM3	protein_coding	8:52733079	PCMTD1	protein_coding	THCA-CN	2	50	0.04	ICGC	GRCh37
17:61512597	CYB561	protein_coding	8:52733079	PCMTD1	protein_coding	THCA-CN	2	50	0.04	ICGC	GRCh37
7:140453136	BRAF	protein_coding	8:52733079	PCMTD1	protein_coding	THCA-CN	2	50	0.04	ICGC	GRCh37
17:48692787	CACNA1G	protein_coding	8:52733079	PCMTD1	protein_coding	THCA-CN	2	50	0.04	ICGC	GRCh37
17:77111772	RBFOX3	protein_coding	17:8047048	PER1	protein_coding	THCA-CN	2	50	0.04	ICGC	GRCh37
15:65678318	IGDCC4	protein_coding	17:8047048	PER1	protein_coding	THCA-CN	2	50	0.04	ICGC	GRCh37
20:18477732	RBBP9	protein_coding	6:83892687	PGM3	protein_coding	THCA-CN	2	50	0.04	ICGC	GRCh37
19:10935797	DNM2	protein_coding	6:83892687	PGM3	protein_coding	THCA-CN	2	50	0.04	ICGC	GRCh37
17:7809271	CHD3	protein_coding	6:83892687	PGM3	protein_coding	THCA-CN	2	50	0.04	ICGC	GRCh37
6:10410472	TFAP2A	protein_coding	6:83892687	PGM3	protein_coding	THCA-CN	2	50	0.04	ICGC	GRCh37
1:27878416	AHDC1	protein_coding	6:83892687	PGM3	protein_coding	THCA-CN	2	50	0.04	ICGC	GRCh37
6:10410466	TFAP2A	protein_coding	6:83892687	PGM3	protein_coding	THCA-CN	2	50	0.04	ICGC	GRCh37
3:102181200	ZPLD1	protein_coding	6:83892687	PGM3	protein_coding	THCA-CN	2	50	0.04	ICGC	GRCh37
19:42596335	POU2F2	protein_coding	6:83892687	PGM3	protein_coding	THCA-CN	2	50	0.04	ICGC	GRCh37
4:48559517	FRYL	protein_coding	6:83892687	PGM3	protein_coding	THCA-CN	2	50	0.04	ICGC	GRCh37
5:71490955	MAP1B	protein_coding	6:83892687	PGM3	protein_coding	THCA-CN	2	50	0.04	ICGC	GRCh37
17:48692787	CACNA1G	protein_coding	6:83892687	PGM3	protein_coding	THCA-CN	2	50	0.04	ICGC	GRCh37
17:77111772	RBFOX3	protein_coding	6:83892687	PGM3	protein_coding	THCA-CN	2	50	0.04	ICGC	GRCh37
3:75714807	DUX4L26	none protein_coding	6:83892687	PGM3	protein_coding	THCA-CN	2	50	0.04	ICGC	GRCh37
10:88476170	LDB3	protein_coding	11:64032516	PLCB3	protein_coding	THCA-CN	2	50	0.04	ICGC	GRCh37
10:88476170	LDB3	protein_coding	19:42596335	POU2F2	protein_coding	THCA-CN	2	50	0.04	ICGC	GRCh37
15:65678318	IGDCC4	protein_coding	19:42596335	POU2F2	protein_coding	THCA-CN	2	50	0.04	ICGC	GRCh37
19:10935797	DNM2	protein_coding	19:42596335	POU2F2	protein_coding	THCA-CN	2	50	0.04	ICGC	GRCh37
18:24127012	KCTD1	protein_coding	19:42596335	POU2F2	protein_coding	THCA-CN	2	50	0.04	ICGC	GRCh37
17:8047048	PER1	protein_coding	19:42596335	POU2F2	protein_coding	THCA-CN	2	50	0.04	ICGC	GRCh37
16:67876755	NUTF2	protein_coding	19:42596335	POU2F2	protein_coding	THCA-CN	2	50	0.04	ICGC	GRCh37
16:776315	HAGHL	protein_coding	19:42596335	POU2F2	protein_coding	THCA-CN	2	50	0.04	ICGC	GRCh37
1:110026628	ATXN7L2	protein_coding	17:72745164	RAB37	protein_coding	THCA-CN	2	50	0.04	ICGC	GRCh37
1:161642774	FCGR2B	protein_coding	17:72745164	RAB37	protein_coding	THCA-CN	2	50	0.04	ICGC	GRCh37
1:29557390	MECR	protein_coding	17:72745164	RAB37	protein_coding	THCA-CN	2	50	0.04	ICGC	GRCh37
19:50435876	NUP62	protein_coding	20:18477732	RBBP9	protein_coding	THCA-CN	2	50	0.04	ICGC	GRCh37
19:42596335	POU2F2	protein_coding	20:18477732	RBBP9	protein_coding	THCA-CN	2	50	0.04	ICGC	GRCh37
1:27878416	AHDC1	protein_coding	20:18477732	RBBP9	protein_coding	THCA-CN	2	50	0.04	ICGC	GRCh37
17:7809271	CHD3	protein_coding	20:18477732	RBBP9	protein_coding	THCA-CN	2	50	0.04	ICGC	GRCh37
19:10935797	DNM2	protein_coding	20:18477732	RBBP9	protein_coding	THCA-CN	2	50	0.04	ICGC	GRCh37
19:2248265	JSRP1	protein_coding	20:18477732	RBBP9	protein_coding	THCA-CN	2	50	0.04	ICGC	GRCh37
1:29557390	MECR	protein_coding	20:18477732	RBBP9	protein_coding	THCA-CN	2	50	0.04	ICGC	GRCh37
17:61512597	CYB561	protein_coding	20:18477732	RBBP9	protein_coding	THCA-CN	2	50	0.04	ICGC	GRCh37
16:29999266	TAOK2	protein_coding	20:18477732	RBBP9	protein_coding	THCA-CN	2	50	0.04	ICGC	GRCh37
17:48692787	CACNA1G	protein_coding	17:77111772	RBFOX3	protein_coding	THCA-CN	2	50	0.04	ICGC	GRCh37
16:776315	HAGHL	protein_coding	17:77111772	RBFOX3	protein_coding	THCA-CN	2	50	0.04	ICGC	GRCh37
1:161642774	FCGR2B	protein_coding	17:77111772	RBFOX3	protein_coding	THCA-CN	2	50	0.04	ICGC	GRCh37
15:82336400	MEX3B	protein_coding	17:77111772	RBFOX3	protein_coding	THCA-CN	2	50	0.04	ICGC	GRCh37
16:67876755	NUTF2	protein_coding	17:77111772	RBFOX3	protein_coding	THCA-CN	2	50	0.04	ICGC	GRCh37
15:82336406	MEX3B	protein_coding	2:230914604	SLC16A14	protein_coding	THCA-CN	2	50	0.04	ICGC	GRCh37
1:110026628	ATXN7L2	protein_coding	2:230914604	SLC16A14	protein_coding	THCA-CN	2	50	0.04	ICGC	GRCh37
19:42596335	POU2F2	protein_coding	2:230914604	SLC16A14	protein_coding	THCA-CN	2	50	0.04	ICGC	GRCh37
10:88476170	LDB3	protein_coding	2:230914604	SLC16A14	protein_coding	THCA-CN	2	50	0.04	ICGC	GRCh37
20:33880040	FAM83C	protein_coding	2:230914604	SLC16A14	protein_coding	THCA-CN	2	50	0.04	ICGC	GRCh37
16:29999266	TAOK2	protein_coding	2:230914604	SLC16A14	protein_coding	THCA-CN	2	50	0.04	ICGC	GRCh37
2:220422605	OBSL1	protein_coding	2:230914604	SLC16A14	protein_coding	THCA-CN	2	50	0.04	ICGC	GRCh37
17:61512597	CYB561	protein_coding	2:230914604	SLC16A14	protein_coding	THCA-CN	2	50	0.04	ICGC	GRCh37
19:50435876	NUP62	protein_coding	2:230914604	SLC16A14	protein_coding	THCA-CN	2	50	0.04	ICGC	GRCh37
17:72745164	RAB37	protein_coding	2:230914604	SLC16A14	protein_coding	THCA-CN	2	50	0.04	ICGC	GRCh37
16:67876755	NUTF2	protein_coding	6:127837125	SOGA3	protein_coding	THCA-CN	2	50	0.04	ICGC	GRCh37
11:64032516	PLCB3	protein_coding	6:127837125	SOGA3	protein_coding	THCA-CN	2	50	0.04	ICGC	GRCh37
2:233271799	ALPG	protein_coding	6:127837125	SOGA3	protein_coding	THCA-CN	2	50	0.04	ICGC	GRCh37
18:24127012	KCTD1	protein_coding	6:127837125	SOGA3	protein_coding	THCA-CN	2	50	0.04	ICGC	GRCh37
1:110026628	ATXN7L2	protein_coding	6:127837125	SOGA3	protein_coding	THCA-CN	2	50	0.04	ICGC	GRCh37
2:242011127	MTERF4	protein_coding	6:127837125	SOGA3	protein_coding	THCA-CN	2	50	0.04	ICGC	GRCh37
17:38975319	TMEM99	none protein_coding	6:127837125	SOGA3	protein_coding	THCA-CN	2	50	0.04	ICGC	GRCh37
5:140590211	PCDHB12	protein_coding	6:127837125	SOGA3	protein_coding	THCA-CN	2	50	0.04	ICGC	GRCh37
22:50617600	PANX2	protein_coding	6:127837125	SOGA3	protein_coding	THCA-CN	2	50	0.04	ICGC	GRCh37
15:82336400	MEX3B	protein_coding	6:127837125	SOGA3	protein_coding	THCA-CN	2	50	0.04	ICGC	GRCh37
4:8869661	HMX1	protein_coding	8:145095687	SPATC1	protein_coding	THCA-CN	2	50	0.04	ICGC	GRCh37
5:71490955	MAP1B	protein_coding	8:145095684	SPATC1	protein_coding	THCA-CN	2	50	0.04	ICGC	GRCh37
4:48559517	FRYL	protein_coding	8:145095684	SPATC1	protein_coding	THCA-CN	2	50	0.04	ICGC	GRCh37
5:10761137	DAP	protein_coding	8:145095687	SPATC1	protein_coding	THCA-CN	2	50	0.04	ICGC	GRCh37
6:10410472	TFAP2A	protein_coding	8:145095684	SPATC1	protein_coding	THCA-CN	2	50	0.04	ICGC	GRCh37
1:110026628	ATXN7L2	protein_coding	8:145095687	SPATC1	protein_coding	THCA-CN	2	50	0.04	ICGC	GRCh37
7:5413839	TNRC18	protein_coding	8:145095684	SPATC1	protein_coding	THCA-CN	2	50	0.04	ICGC	GRCh37
17:72745164	RAB37	protein_coding	8:145095684	SPATC1	protein_coding	THCA-CN	2	50	0.04	ICGC	GRCh37
8:145095684	SPATC1	protein_coding	8:145095687	SPATC1	protein_coding	THCA-CN	2	50	0.04	ICGC	GRCh37
20:33880040	FAM83C	protein_coding	8:145095687	SPATC1	protein_coding	THCA-CN	2	50	0.04	ICGC	GRCh37
16:67876755	NUTF2	protein_coding	8:145095684	SPATC1	protein_coding	THCA-CN	2	50	0.04	ICGC	GRCh37
6:127837125	SOGA3	protein_coding	8:145095684	SPATC1	protein_coding	THCA-CN	2	50	0.04	ICGC	GRCh37
19:40316422	DYRK1B	protein_coding	8:145095684	SPATC1	protein_coding	THCA-CN	2	50	0.04	ICGC	GRCh37
22:50617600	PANX2	protein_coding	8:145095684	SPATC1	protein_coding	THCA-CN	2	50	0.04	ICGC	GRCh37
16:67876755	NUTF2	protein_coding	8:145095687	SPATC1	protein_coding	THCA-CN	2	50	0.04	ICGC	GRCh37
19:42596335	POU2F2	protein_coding	8:145095687	SPATC1	protein_coding	THCA-CN	2	50	0.04	ICGC	GRCh37
1:110026628	ATXN7L2	protein_coding	8:145095684	SPATC1	protein_coding	THCA-CN	2	50	0.04	ICGC	GRCh37
11:64032516	PLCB3	protein_coding	8:145095687	SPATC1	protein_coding	THCA-CN	2	50	0.04	ICGC	GRCh37
15:65678318	IGDCC4	protein_coding	8:145095684	SPATC1	protein_coding	THCA-CN	2	50	0.04	ICGC	GRCh37
6:10410472	TFAP2A	protein_coding	8:145095687	SPATC1	protein_coding	THCA-CN	2	50	0.04	ICGC	GRCh37
16:776315	HAGHL	protein_coding	8:145095684	SPATC1	protein_coding	THCA-CN	2	50	0.04	ICGC	GRCh37
3:184104344	CHRD	protein_coding	8:145095684	SPATC1	protein_coding	THCA-CN	2	50	0.04	ICGC	GRCh37
15:38776684	FAM98B	protein_coding	8:145095684	SPATC1	protein_coding	THCA-CN	2	50	0.04	ICGC	GRCh37
7:94139514	CASD1	protein_coding	8:145095684	SPATC1	protein_coding	THCA-CN	2	50	0.04	ICGC	GRCh37
15:65678318	IGDCC4	protein_coding	16:29999266	TAOK2	protein_coding	THCA-CN	2	50	0.04	ICGC	GRCh37
1:27878416	AHDC1	protein_coding	6:10410466	TFAP2A	protein_coding	THCA-CN	2	50	0.04	ICGC	GRCh37
3:184104344	CHRD	protein_coding	6:10410472	TFAP2A	protein_coding	THCA-CN	2	50	0.04	ICGC	GRCh37
3:102181200	ZPLD1	protein_coding	6:10410472	TFAP2A	protein_coding	THCA-CN	2	50	0.04	ICGC	GRCh37
2:242011127	MTERF4	protein_coding	6:10410472	TFAP2A	protein_coding	THCA-CN	2	50	0.04	ICGC	GRCh37
16:29999266	TAOK2	protein_coding	6:10410472	TFAP2A	protein_coding	THCA-CN	2	50	0.04	ICGC	GRCh37
22:50617600	PANX2	protein_coding	6:10410466	TFAP2A	protein_coding	THCA-CN	2	50	0.04	ICGC	GRCh37
1:110026628	ATXN7L2	protein_coding	6:10410466	TFAP2A	protein_coding	THCA-CN	2	50	0.04	ICGC	GRCh37
4:48559517	FRYL	protein_coding	6:10410466	TFAP2A	protein_coding	THCA-CN	2	50	0.04	ICGC	GRCh37
1:29557390	MECR	protein_coding	6:10410472	TFAP2A	protein_coding	THCA-CN	2	50	0.04	ICGC	GRCh37
2:242011127	MTERF4	protein_coding	6:10410466	TFAP2A	protein_coding	THCA-CN	2	50	0.04	ICGC	GRCh37
11:64032516	PLCB3	protein_coding	6:10410472	TFAP2A	protein_coding	THCA-CN	2	50	0.04	ICGC	GRCh37
15:65678318	IGDCC4	protein_coding	6:10410466	TFAP2A	protein_coding	THCA-CN	2	50	0.04	ICGC	GRCh37
20:33880040	FAM83C	protein_coding	6:10410466	TFAP2A	protein_coding	THCA-CN	2	50	0.04	ICGC	GRCh37
5:140590211	PCDHB12	protein_coding	6:10410472	TFAP2A	protein_coding	THCA-CN	2	50	0.04	ICGC	GRCh37
19:42596335	POU2F2	protein_coding	6:10410472	TFAP2A	protein_coding	THCA-CN	2	50	0.04	ICGC	GRCh37
19:10935797	DNM2	protein_coding	6:10410472	TFAP2A	protein_coding	THCA-CN	2	50	0.04	ICGC	GRCh37
17:72745164	RAB37	protein_coding	6:10410466	TFAP2A	protein_coding	THCA-CN	2	50	0.04	ICGC	GRCh37
20:33880040	FAM83C	protein_coding	6:10410472	TFAP2A	protein_coding	THCA-CN	2	50	0.04	ICGC	GRCh37
10:88476170	LDB3	protein_coding	6:10410472	TFAP2A	protein_coding	THCA-CN	2	50	0.04	ICGC	GRCh37
1:29557390	MECR	protein_coding	6:10410466	TFAP2A	protein_coding	THCA-CN	2	50	0.04	ICGC	GRCh37
22:50617600	PANX2	protein_coding	6:10410472	TFAP2A	protein_coding	THCA-CN	2	50	0.04	ICGC	GRCh37
17:48692787	CACNA1G	protein_coding	6:10410466	TFAP2A	protein_coding	THCA-CN	2	50	0.04	ICGC	GRCh37
16:29999266	TAOK2	protein_coding	6:10410466	TFAP2A	protein_coding	THCA-CN	2	50	0.04	ICGC	GRCh37
2:220422605	OBSL1	protein_coding	6:10410466	TFAP2A	protein_coding	THCA-CN	2	50	0.04	ICGC	GRCh37
15:82336406	MEX3B	protein_coding	6:10410472	TFAP2A	protein_coding	THCA-CN	2	50	0.04	ICGC	GRCh37
10:88476170	LDB3	protein_coding	6:10410466	TFAP2A	protein_coding	THCA-CN	2	50	0.04	ICGC	GRCh37
17:7809271	CHD3	protein_coding	6:10410472	TFAP2A	protein_coding	THCA-CN	2	50	0.04	ICGC	GRCh37
15:38776684	FAM98B	protein_coding	6:10410472	TFAP2A	protein_coding	THCA-CN	2	50	0.04	ICGC	GRCh37
15:82336400	MEX3B	protein_coding	6:10410472	TFAP2A	protein_coding	THCA-CN	2	50	0.04	ICGC	GRCh37
17:7809271	CHD3	protein_coding	6:10410466	TFAP2A	protein_coding	THCA-CN	2	50	0.04	ICGC	GRCh37
3:102181200	ZPLD1	protein_coding	6:10410466	TFAP2A	protein_coding	THCA-CN	2	50	0.04	ICGC	GRCh37
17:77111772	RBFOX3	protein_coding	6:10410472	TFAP2A	protein_coding	THCA-CN	2	50	0.04	ICGC	GRCh37
16:67876755	NUTF2	protein_coding	6:10410472	TFAP2A	protein_coding	THCA-CN	2	50	0.04	ICGC	GRCh37
1:27878416	AHDC1	protein_coding	6:10410472	TFAP2A	protein_coding	THCA-CN	2	50	0.04	ICGC	GRCh37
1:29557390	MECR	protein_coding	17:38975319	TMEM99	none protein_coding	THCA-CN	2	50	0.04	ICGC	GRCh37
15:65678318	IGDCC4	protein_coding	17:38975319	TMEM99	none protein_coding	THCA-CN	2	50	0.04	ICGC	GRCh37
1:16903882	NBPF1	protein_coding	17:38975319	TMEM99	none protein_coding	THCA-CN	2	50	0.04	ICGC	GRCh37
5:140590211	PCDHB12	protein_coding	7:5413839	TNRC18	protein_coding	THCA-CN	2	50	0.04	ICGC	GRCh37
17:72745164	RAB37	protein_coding	7:5413839	TNRC18	protein_coding	THCA-CN	2	50	0.04	ICGC	GRCh37
1:29557390	MECR	protein_coding	7:5413839	TNRC18	protein_coding	THCA-CN	2	50	0.04	ICGC	GRCh37
1:110026628	ATXN7L2	protein_coding	7:5413839	TNRC18	protein_coding	THCA-CN	2	50	0.04	ICGC	GRCh37
17:7809271	CHD3	protein_coding	7:5413839	TNRC18	protein_coding	THCA-CN	2	50	0.04	ICGC	GRCh37
5:71490955	MAP1B	protein_coding	7:5413839	TNRC18	protein_coding	THCA-CN	2	50	0.04	ICGC	GRCh37
2:230914604	SLC16A14	protein_coding	7:5413839	TNRC18	protein_coding	THCA-CN	2	50	0.04	ICGC	GRCh37
5:10761137	DAP	protein_coding	7:5413839	TNRC18	protein_coding	THCA-CN	2	50	0.04	ICGC	GRCh37
19:2248265	JSRP1	protein_coding	7:5413839	TNRC18	protein_coding	THCA-CN	2	50	0.04	ICGC	GRCh37
6:83892687	PGM3	protein_coding	7:5413839	TNRC18	protein_coding	THCA-CN	2	50	0.04	ICGC	GRCh37
22:40066873	CACNA1I	protein_coding	7:5413839	TNRC18	protein_coding	THCA-CN	2	50	0.04	ICGC	GRCh37
6:127837125	SOGA3	protein_coding	7:5413839	TNRC18	protein_coding	THCA-CN	2	50	0.04	ICGC	GRCh37
1:161642774	FCGR2B	protein_coding	7:5413839	TNRC18	protein_coding	THCA-CN	2	50	0.04	ICGC	GRCh37
4:48559517	FRYL	protein_coding	7:5413839	TNRC18	protein_coding	THCA-CN	2	50	0.04	ICGC	GRCh37
19:40316422	DYRK1B	protein_coding	7:5413839	TNRC18	protein_coding	THCA-CN	2	50	0.04	ICGC	GRCh37
11:64032516	PLCB3	protein_coding	6:150263287	ULBP2	protein_coding	THCA-CN	2	50	0.04	ICGC	GRCh37
17:77111772	RBFOX3	protein_coding	6:150263287	ULBP2	protein_coding	THCA-CN	2	50	0.04	ICGC	GRCh37
10:88476170	LDB3	protein_coding	6:150263287	ULBP2	protein_coding	THCA-CN	2	50	0.04	ICGC	GRCh37
19:10935797	DNM2	protein_coding	6:150263287	ULBP2	protein_coding	THCA-CN	2	50	0.04	ICGC	GRCh37
1:16903882	NBPF1	protein_coding	6:150263287	ULBP2	protein_coding	THCA-CN	2	50	0.04	ICGC	GRCh37
20:33880040	FAM83C	protein_coding	6:150263287	ULBP2	protein_coding	THCA-CN	2	50	0.04	ICGC	GRCh37
1:27878416	AHDC1	protein_coding	6:150263287	ULBP2	protein_coding	THCA-CN	2	50	0.04	ICGC	GRCh37
17:72745164	RAB37	protein_coding	6:150263287	ULBP2	protein_coding	THCA-CN	2	50	0.04	ICGC	GRCh37
6:10410466	TFAP2A	protein_coding	6:150263287	ULBP2	protein_coding	THCA-CN	2	50	0.04	ICGC	GRCh37
16:67876755	NUTF2	protein_coding	6:150263287	ULBP2	protein_coding	THCA-CN	2	50	0.04	ICGC	GRCh37
17:61512597	CYB561	protein_coding	6:150263287	ULBP2	protein_coding	THCA-CN	2	50	0.04	ICGC	GRCh37
2:220422605	OBSL1	protein_coding	6:150263287	ULBP2	protein_coding	THCA-CN	2	50	0.04	ICGC	GRCh37
2:242011127	MTERF4	protein_coding	6:150263287	ULBP2	protein_coding	THCA-CN	2	50	0.04	ICGC	GRCh37
3:75714807	DUX4L26	none protein_coding	6:150263287	ULBP2	protein_coding	THCA-CN	2	50	0.04	ICGC	GRCh37
1:29557390	MECR	protein_coding	6:150263287	ULBP2	protein_coding	THCA-CN	2	50	0.04	ICGC	GRCh37
17:77111772	RBFOX3	protein_coding	9:96055149	WNK2	protein_coding	THCA-CN	2	50	0.04	ICGC	GRCh37
19:42596335	POU2F2	protein_coding	9:96055149	WNK2	protein_coding	THCA-CN	2	50	0.04	ICGC	GRCh37
2:230914604	SLC16A14	protein_coding	9:96055149	WNK2	protein_coding	THCA-CN	2	50	0.04	ICGC	GRCh37
16:776315	HAGHL	protein_coding	9:96055149	WNK2	protein_coding	THCA-CN	2	50	0.04	ICGC	GRCh37
8:52733079	PCMTD1	protein_coding	9:96055149	WNK2	protein_coding	THCA-CN	2	50	0.04	ICGC	GRCh37
2:220422605	OBSL1	protein_coding	9:96055149	WNK2	protein_coding	THCA-CN	2	50	0.04	ICGC	GRCh37
17:8047048	PER1	protein_coding	9:96055149	WNK2	protein_coding	THCA-CN	2	50	0.04	ICGC	GRCh37
19:10935797	DNM2	protein_coding	9:96055149	WNK2	protein_coding	THCA-CN	2	50	0.04	ICGC	GRCh37
17:72745164	RAB37	protein_coding	9:96055149	WNK2	protein_coding	THCA-CN	2	50	0.04	ICGC	GRCh37
7:20198700	MACC1	protein_coding	9:96055149	WNK2	protein_coding	THCA-CN	2	50	0.04	ICGC	GRCh37
17:38975319	TMEM99	none protein_coding	9:96055149	WNK2	protein_coding	THCA-CN	2	50	0.04	ICGC	GRCh37
2:242011127	MTERF4	protein_coding	9:96055149	WNK2	protein_coding	THCA-CN	2	50	0.04	ICGC	GRCh37
17:61512597	CYB561	protein_coding	9:96055149	WNK2	protein_coding	THCA-CN	2	50	0.04	ICGC	GRCh37
12:53207583	KRT4	protein_coding	9:96055149	WNK2	protein_coding	THCA-CN	2	50	0.04	ICGC	GRCh37
3:195507324	MUC4	protein_coding	9:96055149	WNK2	protein_coding	THCA-CN	2	50	0.04	ICGC	GRCh37
19:40316422	DYRK1B	protein_coding	9:96055149	WNK2	protein_coding	THCA-CN	2	50	0.04	ICGC	GRCh37
15:65678318	IGDCC4	protein_coding	9:96055149	WNK2	protein_coding	THCA-CN	2	50	0.04	ICGC	GRCh37
8:17014282	ZDHHC2	protein_coding	9:96055149	WNK2	protein_coding	THCA-CN	2	50	0.04	ICGC	GRCh37
17:48692787	CACNA1G	protein_coding	9:96055149	WNK2	protein_coding	THCA-CN	2	50	0.04	ICGC	GRCh37
8:145095684	SPATC1	protein_coding	9:96055149	WNK2	protein_coding	THCA-CN	2	50	0.04	ICGC	GRCh37
1:201179068	IGFN1	protein_coding	8:17014282	ZDHHC2	protein_coding	THCA-CN	2	50	0.04	ICGC	GRCh37
16:16481620	NPIPA7	protein_coding	8:17014282	ZDHHC2	protein_coding	THCA-CN	2	50	0.04	ICGC	GRCh37
19:40316422	DYRK1B	protein_coding	8:17014282	ZDHHC2	protein_coding	THCA-CN	2	50	0.04	ICGC	GRCh37
4:8869661	HMX1	protein_coding	8:17014282	ZDHHC2	protein_coding	THCA-CN	2	50	0.04	ICGC	GRCh37
5:140590211	PCDHB12	protein_coding	8:17014282	ZDHHC2	protein_coding	THCA-CN	2	50	0.04	ICGC	GRCh37
1:110026628	ATXN7L2	protein_coding	8:17014282	ZDHHC2	protein_coding	THCA-CN	2	50	0.04	ICGC	GRCh37
5:10761137	DAP	protein_coding	8:17014282	ZDHHC2	protein_coding	THCA-CN	2	50	0.04	ICGC	GRCh37
19:2248265	JSRP1	protein_coding	8:17014282	ZDHHC2	protein_coding	THCA-CN	2	50	0.04	ICGC	GRCh37
15:38776684	FAM98B	protein_coding	8:17014282	ZDHHC2	protein_coding	THCA-CN	2	50	0.04	ICGC	GRCh37
10:88476170	LDB3	protein_coding	8:17014282	ZDHHC2	protein_coding	THCA-CN	2	50	0.04	ICGC	GRCh37
15:65678318	IGDCC4	protein_coding	8:17014282	ZDHHC2	protein_coding	THCA-CN	2	50	0.04	ICGC	GRCh37
15:82336406	MEX3B	protein_coding	8:17014282	ZDHHC2	protein_coding	THCA-CN	2	50	0.04	ICGC	GRCh37
20:33880040	FAM83C	protein_coding	8:17014282	ZDHHC2	protein_coding	THCA-CN	2	50	0.04	ICGC	GRCh37
15:82336400	MEX3B	protein_coding	8:17014282	ZDHHC2	protein_coding	THCA-CN	2	50	0.04	ICGC	GRCh37
8:145095684	SPATC1	protein_coding	8:17014282	ZDHHC2	protein_coding	THCA-CN	2	50	0.04	ICGC	GRCh37
8:145095687	SPATC1	protein_coding	8:17014282	ZDHHC2	protein_coding	THCA-CN	2	50	0.04	ICGC	GRCh37
6:150263287	ULBP2	protein_coding	8:17014282	ZDHHC2	protein_coding	THCA-CN	2	50	0.04	ICGC	GRCh37
6:127837125	SOGA3	protein_coding	8:17014282	ZDHHC2	protein_coding	THCA-CN	2	50	0.04	ICGC	GRCh37
17:61512597	CYB561	protein_coding	8:17014282	ZDHHC2	protein_coding	THCA-CN	2	50	0.04	ICGC	GRCh37
1:16894523	NBPF1	protein_coding	19:37252640	ZNF850	protein_coding	THCA-CN	2	50	0.04	ICGC	GRCh37
19:50435876	NUP62	protein_coding	3:102181200	ZPLD1	protein_coding	THCA-CN	2	50	0.04	ICGC	GRCh37
19:10935797	DNM2	protein_coding	3:102181200	ZPLD1	protein_coding	THCA-CN	2	50	0.04	ICGC	GRCh37
1:110026628	ATXN7L2	protein_coding	3:102181200	ZPLD1	protein_coding	THCA-CN	2	50	0.04	ICGC	GRCh37
15:65678318	IGDCC4	protein_coding	3:102181200	ZPLD1	protein_coding	THCA-CN	2	50	0.04	ICGC	GRCh37
16:67876755	NUTF2	protein_coding	3:102181200	ZPLD1	protein_coding	THCA-CN	2	50	0.04	ICGC	GRCh37
2:242011127	MTERF4	protein_coding	3:102181200	ZPLD1	protein_coding	THCA-CN	2	50	0.04	ICGC	GRCh37
22:40066873	CACNA1I	protein_coding	3:102181200	ZPLD1	protein_coding	THCA-CN	2	50	0.04	ICGC	GRCh37
1:29557390	MECR	protein_coding	3:102181200	ZPLD1	protein_coding	THCA-CN	2	50	0.04	ICGC	GRCh37
17:39724451	KRT9	protein_coding	2:148683686	ACVR2A	protein_coding	Colon Colorectal Cancer	3	76	0.0394736842105263	DepMap	GRCh37
1:223176250	DISP1	protein_coding	2:148683686	ACVR2A	protein_coding	Colon Colorectal Cancer	3	76	0.0394736842105263	DepMap	GRCh37
16:67683416	RLTPR	NA	2:148683686	ACVR2A	protein_coding	Colon Colorectal Cancer	3	76	0.0394736842105263	DepMap	GRCh37
2:152128240	NMI	protein_coding	2:148683686	ACVR2A	protein_coding	Colon Colorectal Cancer	3	76	0.0394736842105263	DepMap	GRCh37
11:43471750	TTC17	protein_coding	2:148683686	ACVR2A	protein_coding	Colon Colorectal Cancer	3	76	0.0394736842105263	DepMap	GRCh37
12:25398284	KRAS	protein_coding	10:111893350	ADD3	protein_coding	Colon Colorectal Cancer	3	76	0.0394736842105263	DepMap	GRCh37
10:28233229	ARMC4	protein_coding	7:100802405	AP1S1	protein_coding	Colon Colorectal Cancer	3	76	0.0394736842105263	DepMap	GRCh37
7:11022323	PHF14	protein_coding	7:100802405	AP1S1	protein_coding	Colon Colorectal Cancer	3	76	0.0394736842105263	DepMap	GRCh37
1:204228411	PLEKHA6	protein_coding	7:100802405	AP1S1	protein_coding	Colon Colorectal Cancer	3	76	0.0394736842105263	DepMap	GRCh37
10:114925317	TCF7L2	protein_coding	6:139097330	CCDC28A	protein_coding	Colon Colorectal Cancer	3	76	0.0394736842105263	DepMap	GRCh37
1:204228411	PLEKHA6	protein_coding	6:139097330	CCDC28A	protein_coding	Colon Colorectal Cancer	3	76	0.0394736842105263	DepMap	GRCh37
1:204228411	PLEKHA6	protein_coding	20:47858504	DDX27	protein_coding	Colon Colorectal Cancer	3	76	0.0394736842105263	DepMap	GRCh37
16:67683416	RLTPR	NA	1:200594042	DDX59	protein_coding	Colon Colorectal Cancer	3	76	0.0394736842105263	DepMap	GRCh37
10:28233229	ARMC4	protein_coding	1:200594042	DDX59	protein_coding	Colon Colorectal Cancer	3	76	0.0394736842105263	DepMap	GRCh37
17:39724451	KRT9	protein_coding	1:200594042	DDX59	protein_coding	Colon Colorectal Cancer	3	76	0.0394736842105263	DepMap	GRCh37
2:152128240	NMI	protein_coding	1:200594042	DDX59	protein_coding	Colon Colorectal Cancer	3	76	0.0394736842105263	DepMap	GRCh37
7:11022323	PHF14	protein_coding	1:200594042	DDX59	protein_coding	Colon Colorectal Cancer	3	76	0.0394736842105263	DepMap	GRCh37
1:223176250	DISP1	protein_coding	1:200594042	DDX59	protein_coding	Colon Colorectal Cancer	3	76	0.0394736842105263	DepMap	GRCh37
12:25398284	KRAS	protein_coding	3:51417604	DOCK3	protein_coding	Colon Colorectal Cancer	3	76	0.0394736842105263	DepMap	GRCh37
12:25398284	KRAS	protein_coding	21:37653892	DOPEY2	NA	Colon Colorectal Cancer	3	76	0.0394736842105263	DepMap	GRCh37
16:67683416	RLTPR	NA	21:37653892	DOPEY2	NA	Colon Colorectal Cancer	3	76	0.0394736842105263	DepMap	GRCh37
7:11022323	PHF14	protein_coding	8:95686611	ESRP1	protein_coding	Colon Colorectal Cancer	3	76	0.0394736842105263	DepMap	GRCh37
10:28233229	ARMC4	protein_coding	8:95686611	ESRP1	protein_coding	Colon Colorectal Cancer	3	76	0.0394736842105263	DepMap	GRCh37
11:43471750	TTC17	protein_coding	8:95686611	ESRP1	protein_coding	Colon Colorectal Cancer	3	76	0.0394736842105263	DepMap	GRCh37
7:11022323	PHF14	protein_coding	16:4862228	GLYR1	protein_coding	Colon Colorectal Cancer	3	76	0.0394736842105263	DepMap	GRCh37
1:223176250	DISP1	protein_coding	16:4862228	GLYR1	protein_coding	Colon Colorectal Cancer	3	76	0.0394736842105263	DepMap	GRCh37
11:32637520	CCDC73	protein_coding	16:4862228	GLYR1	protein_coding	Colon Colorectal Cancer	3	76	0.0394736842105263	DepMap	GRCh37
6:139097330	CCDC28A	protein_coding	16:4862228	GLYR1	protein_coding	Colon Colorectal Cancer	3	76	0.0394736842105263	DepMap	GRCh37
17:39724451	KRT9	protein_coding	16:4862228	GLYR1	protein_coding	Colon Colorectal Cancer	3	76	0.0394736842105263	DepMap	GRCh37
2:152128240	NMI	protein_coding	16:4862228	GLYR1	protein_coding	Colon Colorectal Cancer	3	76	0.0394736842105263	DepMap	GRCh37
10:28233229	ARMC4	protein_coding	16:4862228	GLYR1	protein_coding	Colon Colorectal Cancer	3	76	0.0394736842105263	DepMap	GRCh37
12:25398284	KRAS	protein_coding	16:4862228	GLYR1	protein_coding	Colon Colorectal Cancer	3	76	0.0394736842105263	DepMap	GRCh37
16:67683416	RLTPR	NA	16:4862228	GLYR1	protein_coding	Colon Colorectal Cancer	3	76	0.0394736842105263	DepMap	GRCh37
10:114925317	TCF7L2	protein_coding	12:57422573	MYO1A	protein_coding	Colon Colorectal Cancer	3	76	0.0394736842105263	DepMap	GRCh37
8:103289349	UBR5	protein_coding	12:57422573	MYO1A	protein_coding	Colon Colorectal Cancer	3	76	0.0394736842105263	DepMap	GRCh37
10:28233229	ARMC4	protein_coding	5:36985083	NIPBL	protein_coding	Colon Colorectal Cancer	3	76	0.0394736842105263	DepMap	GRCh37
11:43471750	TTC17	protein_coding	5:36985083	NIPBL	protein_coding	Colon Colorectal Cancer	3	76	0.0394736842105263	DepMap	GRCh37
7:11022323	PHF14	protein_coding	5:36985083	NIPBL	protein_coding	Colon Colorectal Cancer	3	76	0.0394736842105263	DepMap	GRCh37
12:25398284	KRAS	protein_coding	2:152128240	NMI	protein_coding	Colon Colorectal Cancer	3	76	0.0394736842105263	DepMap	GRCh37
12:25398284	KRAS	protein_coding	11:4703475	OR51E2	protein_coding	Colon Colorectal Cancer	3	76	0.0394736842105263	DepMap	GRCh37
20:47858504	DDX27	protein_coding	11:4703475	OR51E2	protein_coding	Colon Colorectal Cancer	3	76	0.0394736842105263	DepMap	GRCh37
1:27621108	WDTC1	protein_coding	11:4703475	OR51E2	protein_coding	Colon Colorectal Cancer	3	76	0.0394736842105263	DepMap	GRCh37
12:48458896	SENP1	protein_coding	11:4703475	OR51E2	protein_coding	Colon Colorectal Cancer	3	76	0.0394736842105263	DepMap	GRCh37
10:28233229	ARMC4	protein_coding	11:55861307	OR8I2	protein_coding	Colon Colorectal Cancer	3	76	0.0394736842105263	DepMap	GRCh37
2:152128240	NMI	protein_coding	11:55861307	OR8I2	protein_coding	Colon Colorectal Cancer	3	76	0.0394736842105263	DepMap	GRCh37
1:223176250	DISP1	protein_coding	11:55861307	OR8I2	protein_coding	Colon Colorectal Cancer	3	76	0.0394736842105263	DepMap	GRCh37
21:37653892	DOPEY2	NA	11:55861307	OR8I2	protein_coding	Colon Colorectal Cancer	3	76	0.0394736842105263	DepMap	GRCh37
16:67683416	RLTPR	NA	11:55861307	OR8I2	protein_coding	Colon Colorectal Cancer	3	76	0.0394736842105263	DepMap	GRCh37
7:11022323	PHF14	protein_coding	11:55861307	OR8I2	protein_coding	Colon Colorectal Cancer	3	76	0.0394736842105263	DepMap	GRCh37
5:112175951	APC	protein_coding	7:11022323	PHF14	protein_coding	Colon Colorectal Cancer	3	76	0.0394736842105263	DepMap	GRCh37
12:25398284	KRAS	protein_coding	7:11022323	PHF14	protein_coding	Colon Colorectal Cancer	3	76	0.0394736842105263	DepMap	GRCh37
7:11022323	PHF14	protein_coding	1:204228411	PLEKHA6	protein_coding	Colon Colorectal Cancer	3	76	0.0394736842105263	DepMap	GRCh37
10:28233229	ARMC4	protein_coding	1:204228411	PLEKHA6	protein_coding	Colon Colorectal Cancer	3	76	0.0394736842105263	DepMap	GRCh37
11:32637520	CCDC73	protein_coding	1:204228411	PLEKHA6	protein_coding	Colon Colorectal Cancer	3	76	0.0394736842105263	DepMap	GRCh37
12:25398284	KRAS	protein_coding	1:204228411	PLEKHA6	protein_coding	Colon Colorectal Cancer	3	76	0.0394736842105263	DepMap	GRCh37
1:24078404	TCEB3	NA	17:56435161	RNF43	protein_coding	Colon Colorectal Cancer	3	76	0.0394736842105263	DepMap	GRCh37
7:100802405	AP1S1	protein_coding	17:56435161	RNF43	protein_coding	Colon Colorectal Cancer	3	76	0.0394736842105263	DepMap	GRCh37
2:203420130	BMPR2	protein_coding	17:56435161	RNF43	protein_coding	Colon Colorectal Cancer	3	76	0.0394736842105263	DepMap	GRCh37
1:223176250	DISP1	protein_coding	1:6257785	RPL22	protein_coding	Colon Colorectal Cancer	3	76	0.0394736842105263	DepMap	GRCh37
17:39724451	KRT9	protein_coding	1:6257785	RPL22	protein_coding	Colon Colorectal Cancer	3	76	0.0394736842105263	DepMap	GRCh37
2:152128240	NMI	protein_coding	1:6257785	RPL22	protein_coding	Colon Colorectal Cancer	3	76	0.0394736842105263	DepMap	GRCh37
11:43471750	TTC17	protein_coding	1:6257785	RPL22	protein_coding	Colon Colorectal Cancer	3	76	0.0394736842105263	DepMap	GRCh37
16:67683416	RLTPR	NA	1:6257785	RPL22	protein_coding	Colon Colorectal Cancer	3	76	0.0394736842105263	DepMap	GRCh37
10:114925317	TCF7L2	protein_coding	12:48458896	SENP1	protein_coding	Colon Colorectal Cancer	3	76	0.0394736842105263	DepMap	GRCh37
2:203420130	BMPR2	protein_coding	12:48458896	SENP1	protein_coding	Colon Colorectal Cancer	3	76	0.0394736842105263	DepMap	GRCh37
11:4703475	OR51E2	protein_coding	7:100479332	SRRT	protein_coding	Colon Colorectal Cancer	3	76	0.0394736842105263	DepMap	GRCh37
3:51417604	DOCK3	protein_coding	7:100479332	SRRT	protein_coding	Colon Colorectal Cancer	3	76	0.0394736842105263	DepMap	GRCh37
17:39724451	KRT9	protein_coding	7:100479332	SRRT	protein_coding	Colon Colorectal Cancer	3	76	0.0394736842105263	DepMap	GRCh37
12:25398284	KRAS	protein_coding	7:100479332	SRRT	protein_coding	Colon Colorectal Cancer	3	76	0.0394736842105263	DepMap	GRCh37
7:11022323	PHF14	protein_coding	7:100479332	SRRT	protein_coding	Colon Colorectal Cancer	3	76	0.0394736842105263	DepMap	GRCh37
10:28233229	ARMC4	protein_coding	7:100479332	SRRT	protein_coding	Colon Colorectal Cancer	3	76	0.0394736842105263	DepMap	GRCh37
10:64159513	ZNF365	protein_coding	7:100479332	SRRT	protein_coding	Colon Colorectal Cancer	3	76	0.0394736842105263	DepMap	GRCh37
6:139097330	CCDC28A	protein_coding	7:100479332	SRRT	protein_coding	Colon Colorectal Cancer	3	76	0.0394736842105263	DepMap	GRCh37
1:27621108	WDTC1	protein_coding	7:100479332	SRRT	protein_coding	Colon Colorectal Cancer	3	76	0.0394736842105263	DepMap	GRCh37
2:152128240	NMI	protein_coding	7:100479332	SRRT	protein_coding	Colon Colorectal Cancer	3	76	0.0394736842105263	DepMap	GRCh37
16:67683416	RLTPR	NA	7:100479332	SRRT	protein_coding	Colon Colorectal Cancer	3	76	0.0394736842105263	DepMap	GRCh37
1:223176250	DISP1	protein_coding	7:100479332	SRRT	protein_coding	Colon Colorectal Cancer	3	76	0.0394736842105263	DepMap	GRCh37
7:11022323	PHF14	protein_coding	1:24078404	TCEB3	NA	Colon Colorectal Cancer	3	76	0.0394736842105263	DepMap	GRCh37
10:28233229	ARMC4	protein_coding	1:24078404	TCEB3	NA	Colon Colorectal Cancer	3	76	0.0394736842105263	DepMap	GRCh37
17:56435161	RNF43	protein_coding	19:49850473	TEAD2	protein_coding	Colon Colorectal Cancer	3	76	0.0394736842105263	DepMap	GRCh37
10:114925317	TCF7L2	protein_coding	19:49850473	TEAD2	protein_coding	Colon Colorectal Cancer	3	76	0.0394736842105263	DepMap	GRCh37
8:103289349	UBR5	protein_coding	19:49850473	TEAD2	protein_coding	Colon Colorectal Cancer	3	76	0.0394736842105263	DepMap	GRCh37
10:64159513	ZNF365	protein_coding	19:49850473	TEAD2	protein_coding	Colon Colorectal Cancer	3	76	0.0394736842105263	DepMap	GRCh37
12:25398284	KRAS	protein_coding	10:98336475	TM9SF3	protein_coding	Colon Colorectal Cancer	3	76	0.0394736842105263	DepMap	GRCh37
17:56435161	RNF43	protein_coding	10:98336475	TM9SF3	protein_coding	Colon Colorectal Cancer	3	76	0.0394736842105263	DepMap	GRCh37
1:204228411	PLEKHA6	protein_coding	10:98336475	TM9SF3	protein_coding	Colon Colorectal Cancer	3	76	0.0394736842105263	DepMap	GRCh37
10:114925317	TCF7L2	protein_coding	10:98336475	TM9SF3	protein_coding	Colon Colorectal Cancer	3	76	0.0394736842105263	DepMap	GRCh37
16:4862228	GLYR1	protein_coding	10:98336475	TM9SF3	protein_coding	Colon Colorectal Cancer	3	76	0.0394736842105263	DepMap	GRCh37
12:25398284	KRAS	protein_coding	11:43471750	TTC17	protein_coding	Colon Colorectal Cancer	3	76	0.0394736842105263	DepMap	GRCh37
12:48458896	SENP1	protein_coding	8:103289349	UBR5	protein_coding	Colon Colorectal Cancer	3	76	0.0394736842105263	DepMap	GRCh37
12:25398284	KRAS	protein_coding	8:103289349	UBR5	protein_coding	Colon Colorectal Cancer	3	76	0.0394736842105263	DepMap	GRCh37
3:51417604	DOCK3	protein_coding	8:103289349	UBR5	protein_coding	Colon Colorectal Cancer	3	76	0.0394736842105263	DepMap	GRCh37
7:100802405	AP1S1	protein_coding	1:27621108	WDTC1	protein_coding	Colon Colorectal Cancer	3	76	0.0394736842105263	DepMap	GRCh37
8:95686611	ESRP1	protein_coding	1:27621108	WDTC1	protein_coding	Colon Colorectal Cancer	3	76	0.0394736842105263	DepMap	GRCh37
1:204228411	PLEKHA6	protein_coding	1:27621108	WDTC1	protein_coding	Colon Colorectal Cancer	3	76	0.0394736842105263	DepMap	GRCh37
11:32637520	CCDC73	protein_coding	1:27621108	WDTC1	protein_coding	Colon Colorectal Cancer	3	76	0.0394736842105263	DepMap	GRCh37
1:24078404	TCEB3	NA	1:27621108	WDTC1	protein_coding	Colon Colorectal Cancer	3	76	0.0394736842105263	DepMap	GRCh37
10:114925317	TCF7L2	protein_coding	17:48433967	XYLT2	protein_coding	Colon Colorectal Cancer	3	76	0.0394736842105263	DepMap	GRCh37
12:48458896	SENP1	protein_coding	10:64159513	ZNF365	protein_coding	Colon Colorectal Cancer	3	76	0.0394736842105263	DepMap	GRCh37
12:25398284	KRAS	protein_coding	10:64159513	ZNF365	protein_coding	Colon Colorectal Cancer	3	76	0.0394736842105263	DepMap	GRCh37
6:139097330	CCDC28A	protein_coding	10:64159513	ZNF365	protein_coding	Colon Colorectal Cancer	3	76	0.0394736842105263	DepMap	GRCh37
15:30702129	GOLGA8R	protein_coding	X:78618105	ITM2A	protein_coding	Leukemia	5	128	0.0390625	DepMap	GRCh37
2:200684250	FTCDNL1	protein_coding	2:211179766	MYL1	protein_coding	BTCA-SG	2	64	0.03125	ICGC	GRCh37
1:104076467	RNPC3	protein_coding	22:20780097	SCARF2	protein_coding	BTCA-SG	2	64	0.03125	ICGC	GRCh37
15:30702129	GOLGA8R	protein_coding	6:110763879	SLC22A16	protein_coding	Leukemia	4	128	0.03125	DepMap	GRCh37
X:78618105	ITM2A	protein_coding	17:7577538	TP53	protein_coding	Leukemia	4	128	0.03125	DepMap	GRCh37
6:110763879	SLC22A16	protein_coding	17:7577538	TP53	protein_coding	Leukemia	4	128	0.03125	DepMap	GRCh37
12:56661644	CS	protein_coding	3:195511286	MUC4	protein_coding	BLCA-CN	3	100	0.03	ICGC	GRCh37
11:111742145	AP001781.2	protein_coding	19:1004897	AC004528.1	none protein_coding	LMS-FR	2	67	0.0298507462686567	ICGC	GRCh37
11:111742145	AP001781.2	protein_coding	16:57847637	AC092118.1	none protein_coding	LMS-FR	2	67	0.0298507462686567	ICGC	GRCh37
17:39305784	KRTAP4-5	protein_coding	4:88535867	AC093895.2	none protein_coding	LMS-FR	2	67	0.0298507462686567	ICGC	GRCh37
11:111742145	AP001781.2	protein_coding	11:3661589	ART5	protein_coding	LMS-FR	2	67	0.0298507462686567	ICGC	GRCh37
17:39305784	KRTAP4-5	protein_coding	9:95237068	ASPN	protein_coding	LMS-FR	2	67	0.0298507462686567	ICGC	GRCh37
5:139931629	EIF4EBP3	protein_coding	9:95237068	ASPN	protein_coding	LMS-FR	2	67	0.0298507462686567	ICGC	GRCh37
11:111742145	AP001781.2	protein_coding	5:139931628	EIF4EBP3	protein_coding	LMS-FR	2	67	0.0298507462686567	ICGC	GRCh37
2:120194652	TMEM37	protein_coding	5:139931628	EIF4EBP3	protein_coding	LMS-FR	2	67	0.0298507462686567	ICGC	GRCh37
19:36258937	PROSER3	protein_coding	5:139931629	EIF4EBP3	protein_coding	LMS-FR	2	67	0.0298507462686567	ICGC	GRCh37
1:47904684	FOXD2-AS1	none protein_coding	5:139931629	EIF4EBP3	protein_coding	LMS-FR	2	67	0.0298507462686567	ICGC	GRCh37
17:39346621	KRTAP9-1	protein_coding	5:139931628	EIF4EBP3	protein_coding	LMS-FR	2	67	0.0298507462686567	ICGC	GRCh37
16:57847637	AC092118.1	none protein_coding	5:139931628	EIF4EBP3	protein_coding	LMS-FR	2	67	0.0298507462686567	ICGC	GRCh37
17:39346621	KRTAP9-1	protein_coding	5:139931629	EIF4EBP3	protein_coding	LMS-FR	2	67	0.0298507462686567	ICGC	GRCh37
1:117122309	IGSF3	protein_coding	5:139931628	EIF4EBP3	protein_coding	LMS-FR	2	67	0.0298507462686567	ICGC	GRCh37
19:53454475	ZNF816	protein_coding	19:55790901	HSPBP1	protein_coding	LMS-FR	2	67	0.0298507462686567	ICGC	GRCh37
11:111742145	AP001781.2	protein_coding	1:117122309	IGSF3	protein_coding	LMS-FR	2	67	0.0298507462686567	ICGC	GRCh37
11:3661589	ART5	protein_coding	17:39346621	KRTAP9-1	protein_coding	LMS-FR	2	67	0.0298507462686567	ICGC	GRCh37
11:111742145	AP001781.2	protein_coding	17:39346621	KRTAP9-1	protein_coding	LMS-FR	2	67	0.0298507462686567	ICGC	GRCh37
17:39346621	KRTAP9-1	protein_coding	X:114425216	LRCH2	protein_coding	LMS-FR	2	67	0.0298507462686567	ICGC	GRCh37
17:39305784	KRTAP4-5	protein_coding	X:114425216	LRCH2	protein_coding	LMS-FR	2	67	0.0298507462686567	ICGC	GRCh37
16:57847637	AC092118.1	none protein_coding	19:36258937	PROSER3	protein_coding	LMS-FR	2	67	0.0298507462686567	ICGC	GRCh37
1:117122309	IGSF3	protein_coding	19:36258937	PROSER3	protein_coding	LMS-FR	2	67	0.0298507462686567	ICGC	GRCh37
17:39346621	KRTAP9-1	protein_coding	2:120194651	TMEM37	protein_coding	LMS-FR	2	67	0.0298507462686567	ICGC	GRCh37
19:1004897	AC004528.1	none protein_coding	2:120194651	TMEM37	protein_coding	LMS-FR	2	67	0.0298507462686567	ICGC	GRCh37
19:53454475	ZNF816	protein_coding	2:120194651	TMEM37	protein_coding	LMS-FR	2	67	0.0298507462686567	ICGC	GRCh37
19:1004897	AC004528.1	none protein_coding	19:53454475	ZNF816	protein_coding	LMS-FR	2	67	0.0298507462686567	ICGC	GRCh37
11:111742145	AP001781.2	protein_coding	19:53454475	ZNF816	protein_coding	LMS-FR	2	67	0.0298507462686567	ICGC	GRCh37
5:112175951	APC	protein_coding	2:148683686	ACVR2A	protein_coding	Colon Colorectal Cancer	2	76	0.0263157894736842	DepMap	GRCh37
21:37653892	DOPEY2	NA	2:148683686	ACVR2A	protein_coding	Colon Colorectal Cancer	2	76	0.0263157894736842	DepMap	GRCh37
11:55861307	OR8I2	protein_coding	2:148683686	ACVR2A	protein_coding	Colon Colorectal Cancer	2	76	0.0263157894736842	DepMap	GRCh37
7:11022323	PHF14	protein_coding	10:111893350	ADD3	protein_coding	Colon Colorectal Cancer	2	76	0.0263157894736842	DepMap	GRCh37
2:152128240	NMI	protein_coding	10:111893350	ADD3	protein_coding	Colon Colorectal Cancer	2	76	0.0263157894736842	DepMap	GRCh37
11:4703475	OR51E2	protein_coding	10:111893350	ADD3	protein_coding	Colon Colorectal Cancer	2	76	0.0263157894736842	DepMap	GRCh37
1:223176250	DISP1	protein_coding	10:111893350	ADD3	protein_coding	Colon Colorectal Cancer	2	76	0.0263157894736842	DepMap	GRCh37
10:28233229	ARMC4	protein_coding	10:111893350	ADD3	protein_coding	Colon Colorectal Cancer	2	76	0.0263157894736842	DepMap	GRCh37
17:39724451	KRT9	protein_coding	10:111893350	ADD3	protein_coding	Colon Colorectal Cancer	2	76	0.0263157894736842	DepMap	GRCh37
16:67683416	RLTPR	NA	10:111893350	ADD3	protein_coding	Colon Colorectal Cancer	2	76	0.0263157894736842	DepMap	GRCh37
11:43471750	TTC17	protein_coding	7:100802405	AP1S1	protein_coding	Colon Colorectal Cancer	2	76	0.0263157894736842	DepMap	GRCh37
16:67683416	RLTPR	NA	7:100802405	AP1S1	protein_coding	Colon Colorectal Cancer	2	76	0.0263157894736842	DepMap	GRCh37
1:223176250	DISP1	protein_coding	7:100802405	AP1S1	protein_coding	Colon Colorectal Cancer	2	76	0.0263157894736842	DepMap	GRCh37
17:39724451	KRT9	protein_coding	7:100802405	AP1S1	protein_coding	Colon Colorectal Cancer	2	76	0.0263157894736842	DepMap	GRCh37
2:152128240	NMI	protein_coding	7:100802405	AP1S1	protein_coding	Colon Colorectal Cancer	2	76	0.0263157894736842	DepMap	GRCh37
12:25398284	KRAS	protein_coding	7:100802405	AP1S1	protein_coding	Colon Colorectal Cancer	2	76	0.0263157894736842	DepMap	GRCh37
11:43471750	TTC17	protein_coding	5:112175951	APC	protein_coding	Colon Colorectal Cancer	2	76	0.0263157894736842	DepMap	GRCh37
17:39724451	KRT9	protein_coding	5:112175951	APC	protein_coding	Colon Colorectal Cancer	2	76	0.0263157894736842	DepMap	GRCh37
2:152128240	NMI	protein_coding	5:112175951	APC	protein_coding	Colon Colorectal Cancer	2	76	0.0263157894736842	DepMap	GRCh37
10:28233229	ARMC4	protein_coding	5:112175951	APC	protein_coding	Colon Colorectal Cancer	2	76	0.0263157894736842	DepMap	GRCh37
16:67683416	RLTPR	NA	5:112175951	APC	protein_coding	Colon Colorectal Cancer	2	76	0.0263157894736842	DepMap	GRCh37
12:25398284	KRAS	protein_coding	10:28233229	ARMC4	protein_coding	Colon Colorectal Cancer	2	76	0.0263157894736842	DepMap	GRCh37
7:140453136	BRAF	protein_coding	2:203420130	BMPR2	protein_coding	Colon Colorectal Cancer	2	76	0.0263157894736842	DepMap	GRCh37
10:28233229	ARMC4	protein_coding	2:203420130	BMPR2	protein_coding	Colon Colorectal Cancer	2	76	0.0263157894736842	DepMap	GRCh37
7:11022323	PHF14	protein_coding	2:203420130	BMPR2	protein_coding	Colon Colorectal Cancer	2	76	0.0263157894736842	DepMap	GRCh37
17:39724451	KRT9	protein_coding	7:140453136	BRAF	protein_coding	Colon Colorectal Cancer	2	76	0.0263157894736842	DepMap	GRCh37
2:152128240	NMI	protein_coding	7:140453136	BRAF	protein_coding	Colon Colorectal Cancer	2	76	0.0263157894736842	DepMap	GRCh37
10:28233229	ARMC4	protein_coding	6:139097330	CCDC28A	protein_coding	Colon Colorectal Cancer	2	76	0.0263157894736842	DepMap	GRCh37
7:11022323	PHF14	protein_coding	6:139097330	CCDC28A	protein_coding	Colon Colorectal Cancer	2	76	0.0263157894736842	DepMap	GRCh37
12:25398284	KRAS	protein_coding	6:139097330	CCDC28A	protein_coding	Colon Colorectal Cancer	2	76	0.0263157894736842	DepMap	GRCh37
7:140453136	BRAF	protein_coding	11:32637520	CCDC73	protein_coding	Colon Colorectal Cancer	2	76	0.0263157894736842	DepMap	GRCh37
7:11022323	PHF14	protein_coding	20:47858504	DDX27	protein_coding	Colon Colorectal Cancer	2	76	0.0263157894736842	DepMap	GRCh37
17:39724451	KRT9	protein_coding	20:47858504	DDX27	protein_coding	Colon Colorectal Cancer	2	76	0.0263157894736842	DepMap	GRCh37
1:223176250	DISP1	protein_coding	20:47858504	DDX27	protein_coding	Colon Colorectal Cancer	2	76	0.0263157894736842	DepMap	GRCh37
16:67683416	RLTPR	NA	20:47858504	DDX27	protein_coding	Colon Colorectal Cancer	2	76	0.0263157894736842	DepMap	GRCh37
10:28233229	ARMC4	protein_coding	20:47858504	DDX27	protein_coding	Colon Colorectal Cancer	2	76	0.0263157894736842	DepMap	GRCh37
2:152128240	NMI	protein_coding	20:47858504	DDX27	protein_coding	Colon Colorectal Cancer	2	76	0.0263157894736842	DepMap	GRCh37
11:43471750	TTC17	protein_coding	1:200594042	DDX59	protein_coding	Colon Colorectal Cancer	2	76	0.0263157894736842	DepMap	GRCh37
5:112175951	APC	protein_coding	1:200594042	DDX59	protein_coding	Colon Colorectal Cancer	2	76	0.0263157894736842	DepMap	GRCh37
7:140453136	BRAF	protein_coding	1:200594042	DDX59	protein_coding	Colon Colorectal Cancer	2	76	0.0263157894736842	DepMap	GRCh37
12:25398284	KRAS	protein_coding	1:223176250	DISP1	protein_coding	Colon Colorectal Cancer	2	76	0.0263157894736842	DepMap	GRCh37
5:112175951	APC	protein_coding	21:37653892	DOPEY2	NA	Colon Colorectal Cancer	2	76	0.0263157894736842	DepMap	GRCh37
1:223176250	DISP1	protein_coding	8:95686611	ESRP1	protein_coding	Colon Colorectal Cancer	2	76	0.0263157894736842	DepMap	GRCh37
17:39724451	KRT9	protein_coding	8:95686611	ESRP1	protein_coding	Colon Colorectal Cancer	2	76	0.0263157894736842	DepMap	GRCh37
21:37653892	DOPEY2	NA	8:95686611	ESRP1	protein_coding	Colon Colorectal Cancer	2	76	0.0263157894736842	DepMap	GRCh37
2:152128240	NMI	protein_coding	8:95686611	ESRP1	protein_coding	Colon Colorectal Cancer	2	76	0.0263157894736842	DepMap	GRCh37
16:67683416	RLTPR	NA	8:95686611	ESRP1	protein_coding	Colon Colorectal Cancer	2	76	0.0263157894736842	DepMap	GRCh37
11:43471750	TTC17	protein_coding	16:4862228	GLYR1	protein_coding	Colon Colorectal Cancer	2	76	0.0263157894736842	DepMap	GRCh37
12:25398284	KRAS	protein_coding	17:39724451	KRT9	protein_coding	Colon Colorectal Cancer	2	76	0.0263157894736842	DepMap	GRCh37
7:140453136	BRAF	protein_coding	12:57422573	MYO1A	protein_coding	Colon Colorectal Cancer	2	76	0.0263157894736842	DepMap	GRCh37
12:48458896	SENP1	protein_coding	12:57422573	MYO1A	protein_coding	Colon Colorectal Cancer	2	76	0.0263157894736842	DepMap	GRCh37
5:112175951	APC	protein_coding	12:57422573	MYO1A	protein_coding	Colon Colorectal Cancer	2	76	0.0263157894736842	DepMap	GRCh37
1:223176250	DISP1	protein_coding	5:36985083	NIPBL	protein_coding	Colon Colorectal Cancer	2	76	0.0263157894736842	DepMap	GRCh37
21:37653892	DOPEY2	NA	5:36985083	NIPBL	protein_coding	Colon Colorectal Cancer	2	76	0.0263157894736842	DepMap	GRCh37
17:39724451	KRT9	protein_coding	5:36985083	NIPBL	protein_coding	Colon Colorectal Cancer	2	76	0.0263157894736842	DepMap	GRCh37
11:55861307	OR8I2	protein_coding	5:36985083	NIPBL	protein_coding	Colon Colorectal Cancer	2	76	0.0263157894736842	DepMap	GRCh37
16:67683416	RLTPR	NA	5:36985083	NIPBL	protein_coding	Colon Colorectal Cancer	2	76	0.0263157894736842	DepMap	GRCh37
2:152128240	NMI	protein_coding	5:36985083	NIPBL	protein_coding	Colon Colorectal Cancer	2	76	0.0263157894736842	DepMap	GRCh37
7:140453136	BRAF	protein_coding	11:4703475	OR51E2	protein_coding	Colon Colorectal Cancer	2	76	0.0263157894736842	DepMap	GRCh37
10:114925317	TCF7L2	protein_coding	11:4703475	OR51E2	protein_coding	Colon Colorectal Cancer	2	76	0.0263157894736842	DepMap	GRCh37
6:139097330	CCDC28A	protein_coding	11:4703475	OR51E2	protein_coding	Colon Colorectal Cancer	2	76	0.0263157894736842	DepMap	GRCh37
7:140453136	BRAF	protein_coding	11:55861307	OR8I2	protein_coding	Colon Colorectal Cancer	2	76	0.0263157894736842	DepMap	GRCh37
5:112175951	APC	protein_coding	11:55861307	OR8I2	protein_coding	Colon Colorectal Cancer	2	76	0.0263157894736842	DepMap	GRCh37
7:140453136	BRAF	protein_coding	7:11022323	PHF14	protein_coding	Colon Colorectal Cancer	2	76	0.0263157894736842	DepMap	GRCh37
16:67683416	RLTPR	NA	1:204228411	PLEKHA6	protein_coding	Colon Colorectal Cancer	2	76	0.0263157894736842	DepMap	GRCh37
1:223176250	DISP1	protein_coding	1:204228411	PLEKHA6	protein_coding	Colon Colorectal Cancer	2	76	0.0263157894736842	DepMap	GRCh37
2:152128240	NMI	protein_coding	1:204228411	PLEKHA6	protein_coding	Colon Colorectal Cancer	2	76	0.0263157894736842	DepMap	GRCh37
17:39724451	KRT9	protein_coding	1:204228411	PLEKHA6	protein_coding	Colon Colorectal Cancer	2	76	0.0263157894736842	DepMap	GRCh37
11:43471750	TTC17	protein_coding	1:204228411	PLEKHA6	protein_coding	Colon Colorectal Cancer	2	76	0.0263157894736842	DepMap	GRCh37
21:37653892	DOPEY2	NA	1:204228411	PLEKHA6	protein_coding	Colon Colorectal Cancer	2	76	0.0263157894736842	DepMap	GRCh37
11:55861307	OR8I2	protein_coding	1:204228411	PLEKHA6	protein_coding	Colon Colorectal Cancer	2	76	0.0263157894736842	DepMap	GRCh37
12:25398284	KRAS	protein_coding	16:67683416	RLTPR	NA	Colon Colorectal Cancer	2	76	0.0263157894736842	DepMap	GRCh37
5:112175951	APC	protein_coding	17:56435161	RNF43	protein_coding	Colon Colorectal Cancer	2	76	0.0263157894736842	DepMap	GRCh37
10:64159513	ZNF365	protein_coding	17:56435161	RNF43	protein_coding	Colon Colorectal Cancer	2	76	0.0263157894736842	DepMap	GRCh37
11:55861307	OR8I2	protein_coding	17:56435161	RNF43	protein_coding	Colon Colorectal Cancer	2	76	0.0263157894736842	DepMap	GRCh37
12:48458896	SENP1	protein_coding	17:56435161	RNF43	protein_coding	Colon Colorectal Cancer	2	76	0.0263157894736842	DepMap	GRCh37
7:140453136	BRAF	protein_coding	17:56435161	RNF43	protein_coding	Colon Colorectal Cancer	2	76	0.0263157894736842	DepMap	GRCh37
6:139097330	CCDC28A	protein_coding	17:56435161	RNF43	protein_coding	Colon Colorectal Cancer	2	76	0.0263157894736842	DepMap	GRCh37
21:37653892	DOPEY2	NA	1:6257785	RPL22	protein_coding	Colon Colorectal Cancer	2	76	0.0263157894736842	DepMap	GRCh37
5:112175951	APC	protein_coding	1:6257785	RPL22	protein_coding	Colon Colorectal Cancer	2	76	0.0263157894736842	DepMap	GRCh37
11:55861307	OR8I2	protein_coding	1:6257785	RPL22	protein_coding	Colon Colorectal Cancer	2	76	0.0263157894736842	DepMap	GRCh37
7:140453136	BRAF	protein_coding	1:6257785	RPL22	protein_coding	Colon Colorectal Cancer	2	76	0.0263157894736842	DepMap	GRCh37
1:223176250	DISP1	protein_coding	12:48458896	SENP1	protein_coding	Colon Colorectal Cancer	2	76	0.0263157894736842	DepMap	GRCh37
16:67683416	RLTPR	NA	12:48458896	SENP1	protein_coding	Colon Colorectal Cancer	2	76	0.0263157894736842	DepMap	GRCh37
7:11022323	PHF14	protein_coding	12:48458896	SENP1	protein_coding	Colon Colorectal Cancer	2	76	0.0263157894736842	DepMap	GRCh37
17:39724451	KRT9	protein_coding	12:48458896	SENP1	protein_coding	Colon Colorectal Cancer	2	76	0.0263157894736842	DepMap	GRCh37
2:152128240	NMI	protein_coding	12:48458896	SENP1	protein_coding	Colon Colorectal Cancer	2	76	0.0263157894736842	DepMap	GRCh37
10:28233229	ARMC4	protein_coding	12:48458896	SENP1	protein_coding	Colon Colorectal Cancer	2	76	0.0263157894736842	DepMap	GRCh37
11:43471750	TTC17	protein_coding	7:100479332	SRRT	protein_coding	Colon Colorectal Cancer	2	76	0.0263157894736842	DepMap	GRCh37
1:223176250	DISP1	protein_coding	1:24078404	TCEB3	NA	Colon Colorectal Cancer	2	76	0.0263157894736842	DepMap	GRCh37
2:152128240	NMI	protein_coding	1:24078404	TCEB3	NA	Colon Colorectal Cancer	2	76	0.0263157894736842	DepMap	GRCh37
11:43471750	TTC17	protein_coding	1:24078404	TCEB3	NA	Colon Colorectal Cancer	2	76	0.0263157894736842	DepMap	GRCh37
16:67683416	RLTPR	NA	1:24078404	TCEB3	NA	Colon Colorectal Cancer	2	76	0.0263157894736842	DepMap	GRCh37
17:39724451	KRT9	protein_coding	1:24078404	TCEB3	NA	Colon Colorectal Cancer	2	76	0.0263157894736842	DepMap	GRCh37
7:11022323	PHF14	protein_coding	10:114925317	TCF7L2	protein_coding	Colon Colorectal Cancer	2	76	0.0263157894736842	DepMap	GRCh37
10:28233229	ARMC4	protein_coding	10:114925317	TCF7L2	protein_coding	Colon Colorectal Cancer	2	76	0.0263157894736842	DepMap	GRCh37
11:43471750	TTC17	protein_coding	10:114925317	TCF7L2	protein_coding	Colon Colorectal Cancer	2	76	0.0263157894736842	DepMap	GRCh37
11:4703475	OR51E2	protein_coding	19:49850473	TEAD2	protein_coding	Colon Colorectal Cancer	2	76	0.0263157894736842	DepMap	GRCh37
16:4862228	GLYR1	protein_coding	19:49850473	TEAD2	protein_coding	Colon Colorectal Cancer	2	76	0.0263157894736842	DepMap	GRCh37
1:27621108	WDTC1	protein_coding	10:98336475	TM9SF3	protein_coding	Colon Colorectal Cancer	2	76	0.0263157894736842	DepMap	GRCh37
17:39724451	KRT9	protein_coding	10:98336475	TM9SF3	protein_coding	Colon Colorectal Cancer	2	76	0.0263157894736842	DepMap	GRCh37
2:152128240	NMI	protein_coding	10:98336475	TM9SF3	protein_coding	Colon Colorectal Cancer	2	76	0.0263157894736842	DepMap	GRCh37
11:4703475	OR51E2	protein_coding	10:98336475	TM9SF3	protein_coding	Colon Colorectal Cancer	2	76	0.0263157894736842	DepMap	GRCh37
10:28233229	ARMC4	protein_coding	10:98336475	TM9SF3	protein_coding	Colon Colorectal Cancer	2	76	0.0263157894736842	DepMap	GRCh37
1:223176250	DISP1	protein_coding	10:98336475	TM9SF3	protein_coding	Colon Colorectal Cancer	2	76	0.0263157894736842	DepMap	GRCh37
7:11022323	PHF14	protein_coding	10:98336475	TM9SF3	protein_coding	Colon Colorectal Cancer	2	76	0.0263157894736842	DepMap	GRCh37
16:67683416	RLTPR	NA	10:98336475	TM9SF3	protein_coding	Colon Colorectal Cancer	2	76	0.0263157894736842	DepMap	GRCh37
7:140453136	BRAF	protein_coding	8:103289349	UBR5	protein_coding	Colon Colorectal Cancer	2	76	0.0263157894736842	DepMap	GRCh37
1:204228411	PLEKHA6	protein_coding	8:103289349	UBR5	protein_coding	Colon Colorectal Cancer	2	76	0.0263157894736842	DepMap	GRCh37
5:112175951	APC	protein_coding	1:27621108	WDTC1	protein_coding	Colon Colorectal Cancer	2	76	0.0263157894736842	DepMap	GRCh37
7:140453136	BRAF	protein_coding	1:27621108	WDTC1	protein_coding	Colon Colorectal Cancer	2	76	0.0263157894736842	DepMap	GRCh37
12:25398284	KRAS	protein_coding	1:27621108	WDTC1	protein_coding	Colon Colorectal Cancer	2	76	0.0263157894736842	DepMap	GRCh37
5:36985083	NIPBL	protein_coding	1:27621108	WDTC1	protein_coding	Colon Colorectal Cancer	2	76	0.0263157894736842	DepMap	GRCh37
7:140453136	BRAF	protein_coding	17:48433967	XYLT2	protein_coding	Colon Colorectal Cancer	2	76	0.0263157894736842	DepMap	GRCh37
5:112175951	APC	protein_coding	17:48433967	XYLT2	protein_coding	Colon Colorectal Cancer	2	76	0.0263157894736842	DepMap	GRCh37
7:140453136	BRAF	protein_coding	10:64159513	ZNF365	protein_coding	Colon Colorectal Cancer	2	76	0.0263157894736842	DepMap	GRCh37
19:3118944	GNA11	protein_coding	2:197402759	SF3B1	protein_coding	TCGA_UVM.csv	2	80	0.025	TCGA	GRCh38
6:110763879	SLC22A16	protein_coding	X:78618105	ITM2A	protein_coding	Leukemia	3	128	0.0234375	DepMap	GRCh37
15:30702129	GOLGA8R	protein_coding	17:7577538	TP53	protein_coding	Leukemia	2	128	0.015625	DepMap	GRCh37
12:25398284	KRAS	protein_coding	12:25398285	KRAS	protein_coding	PACA-CA	3	258	0.0116279069767442	ICGC	GRCh37
12:25398284	KRAS	protein_coding	4:190876278	FRG1	protein_coding	COCA-CN	3	305	0.00983606557377049	ICGC	GRCh37
12:25398284	KRAS	protein_coding	4:190876256	FRG1	protein_coding	COCA-CN	2	305	0.00655737704918033	ICGC	GRCh37
