# Supplementary material for: Comprehensive Analysis of Co-Mutations Identifies Cooperating Mechanisms of Tumorigenesis
Source: Cancers (Basel). 2022 Jan 14;14(2):415. doi: 10.3390/cancers14020415 (PMC8774165; doi:10.3390/cancers14020415)
Supplement: Supplementary file 1 [file cancers-14-00415-s001.zip › Supplementary Table S3.csv]

p	beta	stderr	project	lag	adjp	database	gene1	gene2	Type1	Type2	Types
8.436829e-05	-1.38786	0.3529976	Lung Cancer	gender	0.03044025	DepMap	TP53	NRXN1	protein_coding	protein_coding	coding:coding
0.0001254751	-1.373391	0.3581039	Lung Cancer	gender	0.03044025	DepMap	TTN	NRXN1	protein_coding	protein_coding	coding:coding
9.589062e-05	-1.479385	0.3792554	Lung Cancer	gender	0.03044025	DepMap	RYR2	NRXN1	protein_coding	protein_coding	coding:coding
8.015688e-05	-1.551319	0.3933433	Lung Cancer	gender	0.03044025	DepMap	MUC16	NRXN1	protein_coding	protein_coding	coding:coding
0.000115171	-1.554655	0.4031589	Lung Cancer	gender	0.03044025	DepMap	NRXN1	CSMD3	protein_coding	protein_coding	coding:coding
0.0007689684	1.695179	0.5039581	CESC-US	age	0.001537937	ICGC	PIK3CA	TTN-AS1	protein_coding	none protein_coding	coding:non-coding
0.01614543	0.8970378	0.3728939	KIRC-US	age	0.01614543	ICGC	VHL	PBRM1	protein_coding	protein_coding	coding:coding
1.906332e-08	-1.050355	0.1868862	LGG-US	age	7.625328e-08	ICGC	IDH1	TP53	protein_coding	protein_coding	coding:coding
0.0005853634	-0.8071279	0.2347457	LGG-US	age	0.001170727	ICGC	ATRX	IDH1	protein_coding	protein_coding	coding:coding
0.002058339	-0.74477	0.2416764	LGG-US	age	0.002744452	ICGC	ATRX	TP53	protein_coding	protein_coding	coding:coding
0.00447773	-0.61636	0.216846	LUAD-US	age	0.04444884	ICGC	CSMD3	MUC16	protein_coding	protein_coding	coding:coding
0.001081299	-0.7182861	0.219762	LUAD-US	age	0.03521446	ICGC	TP53	CSMD3	protein_coding	protein_coding	coding:coding
3.256563e-05	-0.9605058	0.2311831	LUAD-US	age	0.006806217	ICGC	TTN-AS1	FLG-AS1	none protein_coding	none protein_coding	non-coding:non-coding
0.0006087767	-0.7816722	0.2280474	LUAD-US	age	0.03180858	ICGC	MUC16	FLG-AS1	protein_coding	none protein_coding	coding:non-coding
0.0001535354	-0.8895677	0.2350071	LUAD-US	age	0.01604445	ICGC	CSMD3	FLG-AS1	protein_coding	none protein_coding	coding:non-coding
0.004678825	-0.6592456	0.2330847	LUAD-US	age	0.04444884	ICGC	ZFHX4	RYR2	protein_coding	protein_coding	coding:coding
0.002190373	-0.7237842	0.2362893	LUAD-US	age	0.03521446	ICGC	ZFHX4	CSMD3	protein_coding	protein_coding	coding:coding
0.0004588404	-0.8365884	0.2387728	LUAD-US	age	0.03180858	ICGC	TP53	FLG-AS1	protein_coding	none protein_coding	coding:non-coding
0.003087558	-0.7008522	0.2368637	LUAD-US	age	0.04033123	ICGC	TP53	LRP1B	protein_coding	protein_coding	coding:coding
0.001465827	-0.757226	0.2380192	LUAD-US	age	0.03521446	ICGC	RYR2	FLG-AS1	protein_coding	none protein_coding	coding:non-coding
0.003397013	-0.7332416	0.250311	LUAD-US	age	0.04176328	ICGC	SPTA1	TTN-AS1	protein_coding	none protein_coding	coding:non-coding
0.002115059	-0.7857942	0.2556608	LUAD-US	age	0.03521446	ICGC	SPTA1	MUC16	protein_coding	protein_coding	coding:coding
0.002657482	-0.7908161	0.2631835	LUAD-US	age	0.03967241	ICGC	SPTA1	CSMD3	protein_coding	protein_coding	coding:coding
0.005072228	-0.7527768	0.2686176	LUAD-US	age	0.04609112	ICGC	CSMD3	PCDHGB1	protein_coding	protein_coding	coding:coding
0.002125702	-0.8446691	0.2749499	LUAD-US	age	0.03521446	ICGC	TP53	ANK2	protein_coding	protein_coding	coding:coding
0.002125702	-0.8446691	0.2749499	LUAD-US	age	0.03521446	ICGC	SPTA1	FLG-AS1	protein_coding	none protein_coding	coding:non-coding
0.001337315	-0.8933492	0.2784885	LUAD-US	age	0.03521446	ICGC	TP53	SPTA1	protein_coding	protein_coding	coding:coding
0.004104683	-0.807386	0.2813189	LUAD-US	age	0.04419908	ICGC	TP53	FAT3	protein_coding	protein_coding	coding:coding
0.002176646	-0.9064568	0.2957437	LUAD-US	age	0.03521446	ICGC	SPTA1	LRP1B	protein_coding	protein_coding	coding:coding
0.006688248	-0.8114512	0.2992098	LUAD-US	age	0.049923	ICGC	TNR	RYR2	protein_coding	protein_coding	coding:coding
0.006139598	-0.8365673	0.3052908	LUAD-US	age	0.04935292	ICGC	PAPPA2	TP53	protein_coding	protein_coding	coding:coding
0.004229577	-0.8696764	0.3040282	LUAD-US	age	0.04419908	ICGC	CACNA1E	TTN-AS1	protein_coding	none protein_coding	coding:non-coding
0.002894948	-0.9020382	0.3028317	LUAD-US	age	0.04033123	ICGC	ANK2	CSMD3	protein_coding	protein_coding	coding:coding
0.006688248	-0.8114512	0.2992098	LUAD-US	age	0.049923	ICGC	CDH10	CSMD3	protein_coding	protein_coding	coding:coding
0.006139598	-0.8365673	0.3052908	LUAD-US	age	0.04935292	ICGC	CSMD3	MUC17	protein_coding	protein_coding	coding:coding
0.006139598	-0.8365673	0.3052908	LUAD-US	age	0.04935292	ICGC	CDH10	TP53	protein_coding	protein_coding	coding:coding
0.003839758	-0.8978665	0.3105692	LUAD-US	age	0.04419908	ICGC	ANK2	FLG-AS1	protein_coding	none protein_coding	coding:non-coding
0.001582334	-0.995724	0.3151879	LUAD-US	age	0.03521446	ICGC	FAM135B	TTN-AS1	protein_coding	none protein_coding	coding:non-coding
0.0002334086	-1.527373	0.4150685	LUSC-KR	gender	0.00508312	ICGC	MUC4	FLG-AS1	protein_coding	none protein_coding	coding:non-coding
9.261315e-05	-1.704183	0.4359449	LUSC-KR	gender	0.002665096	ICGC	MUC4	MUC12	protein_coding	protein_coding	coding:coding
2.994157e-06	-2.505526	0.536375	LUSC-KR	gender	0.0001467137	ICGC	MUC4	IGFN1	protein_coding	protein_coding	coding:coding
6.421214e-07	-2.807305	0.5639313	LUSC-KR	gender	0.0001221715	ICGC	MUC4	MUC6	protein_coding	protein_coding	coding:coding
0.0001710574	-1.984462	0.5280182	LUSC-KR	gender	0.004190907	ICGC	MUC4	NBPF1	protein_coding	protein_coding	coding:coding
9.5182e-05	-2.146581	0.5500448	LUSC-KR	gender	0.002665096	ICGC	MUC4	HRNR	protein_coding	protein_coding	coding:coding
1.809572e-05	-2.461559	0.5741677	LUSC-KR	gender	0.0007093523	ICGC	AFDN	MUC4	protein_coding	protein_coding	coding:coding
1.869973e-06	-3.746943	0.7860185	LUSC-KR	gender	0.0001221715	ICGC	MUC4	PRAMEF6	protein_coding	protein_coding	coding:coding
0.0005380646	-1.852784	0.5353237	LUSC-KR	gender	0.01054607	ICGC	FLG-AS1	PRB1	none protein_coding	protein_coding	coding:non-coding
1.737939e-06	-3.222204	0.6738574	LUSC-KR	gender	0.0001221715	ICGC	MUC4	PRB1	protein_coding	protein_coding	coding:coding
0.0005380731	1.546637	0.4468693	MALY-DE	age	0.003766512	ICGC	KMT2D	IGLL5	protein_coding	protein_coding	coding:coding
0.03071056	0.5769157	0.2669914	RECA-EU	age	0.03071056	ICGC	VHL	PBRM1	protein_coding	protein_coding	coding:coding
0.000444875	0.6917125	0.1969611	SKCM-US	gender	0.01156321	ICGC	MUC16	TTN-AS1	protein_coding	none protein_coding	coding:non-coding
7.805936e-06	0.8765504	0.196077	SKCM-US	gender	0.0107732	ICGC	TTN	TTN-AS1	protein_coding	none protein_coding	coding:non-coding
1.119607e-05	0.8646164	0.1968311	SKCM-US	gender	0.0107732	ICGC	TTN	MUC16	protein_coding	protein_coding	coding:coding
0.004790186	0.5480015	0.1942707	SKCM-US	gender	0.02183772	ICGC	DNAH5	TTN-AS1	protein_coding	none protein_coding	coding:non-coding
0.001909137	0.6064155	0.1953649	SKCM-US	gender	0.015737	ICGC	DNAH5	MUC16	protein_coding	protein_coding	coding:coding
1.481575e-05	0.8716527	0.2012399	SKCM-US	gender	0.0107732	ICGC	PCLO	TTN-AS1	protein_coding	none protein_coding	coding:non-coding
0.0001092986	0.7759259	0.2005513	SKCM-US	gender	0.01092143	ICGC	MUC16	PCLO	protein_coding	protein_coding	coding:coding
0.0006358856	0.6904828	0.2021422	SKCM-US	gender	0.01196597	ICGC	LRP1B	MUC16	protein_coding	protein_coding	coding:coding
0.008063437	0.5290791	0.1996975	SKCM-US	gender	0.02738877	ICGC	ADGRV1	TTN-AS1	protein_coding	none protein_coding	coding:non-coding
0.009922182	0.5150664	0.199752	SKCM-US	gender	0.03021185	ICGC	LRP1B	TTN-AS1	protein_coding	none protein_coding	coding:non-coding
0.002731477	0.6065804	0.2024334	SKCM-US	gender	0.01761617	ICGC	ADGRV1	MUC16	protein_coding	protein_coding	coding:coding
0.001516447	0.646988	0.2039995	SKCM-US	gender	0.01430896	ICGC	TTN-AS1	FLG-AS1	none protein_coding	none protein_coding	non-coding:non-coding
6.578721e-05	0.8311945	0.2082657	SKCM-US	gender	0.01092143	ICGC	DNAH5	TTN	protein_coding	protein_coding	coding:coding
0.005658265	0.5630973	0.203508	SKCM-US	gender	0.02357759	ICGC	MUC16	FLG-AS1	protein_coding	none protein_coding	coding:non-coding
0.004802338	0.5762828	0.2043555	SKCM-US	gender	0.02183772	ICGC	DNAH7	TTN-AS1	protein_coding	none protein_coding	coding:non-coding
0.001105772	0.6746386	0.206809	SKCM-US	gender	0.01341609	ICGC	CSMD2	TTN-AS1	protein_coding	none protein_coding	coding:non-coding
0.0001298262	0.8063561	0.2107135	SKCM-US	gender	0.01092143	ICGC	MUC16	PKHD1L1	protein_coding	protein_coding	coding:coding
6.143004e-06	0.9736332	0.2153386	SKCM-US	gender	0.0107732	ICGC	TTN	PCLO	protein_coding	protein_coding	coding:coding
0.02027833	0.4758687	0.2050135	SKCM-US	gender	0.04551024	ICGC	MUC16	CSMD1	protein_coding	protein_coding	coding:coding
0.0002246533	0.7779861	0.2108622	SKCM-US	gender	0.01092143	ICGC	CSMD2	MUC16	protein_coding	protein_coding	coding:coding
0.01441578	0.5035766	0.205816	SKCM-US	gender	0.037514	ICGC	CSMD1	TTN-AS1	protein_coding	none protein_coding	coding:non-coding
0.005613791	0.5744882	0.207432	SKCM-US	gender	0.02341993	ICGC	PKHD1L1	TTN-AS1	protein_coding	none protein_coding	coding:non-coding
0.0006425096	0.720839	0.2112037	SKCM-US	gender	0.01196597	ICGC	DNAH7	MUC16	protein_coding	protein_coding	coding:coding
0.002641136	0.6330433	0.2105453	SKCM-US	gender	0.01739501	ICGC	ANK3	TTN-AS1	protein_coding	none protein_coding	coding:non-coding
0.002190684	0.6485086	0.2117175	SKCM-US	gender	0.01628533	ICGC	RP1	MUC16	protein_coding	protein_coding	coding:coding
0.0007057846	0.724509	0.2138884	SKCM-US	gender	0.01243407	ICGC	TTN	LRP1B	protein_coding	protein_coding	coding:coding
0.00276714	0.6339061	0.2118325	SKCM-US	gender	0.01761617	ICGC	ANK3	MUC16	protein_coding	protein_coding	coding:coding
0.003481545	0.6192541	0.2119517	SKCM-US	gender	0.01907778	ICGC	RP1	TTN-AS1	protein_coding	none protein_coding	coding:non-coding
0.0005712079	0.741432	0.2152241	SKCM-US	gender	0.01169374	ICGC	HYDIN	TTN-AS1	protein_coding	none protein_coding	coding:non-coding
0.0004599515	0.7588481	0.2166246	SKCM-US	gender	0.01158025	ICGC	PCDHA9	TTN-AS1	protein_coding	none protein_coding	coding:non-coding
7.675213e-05	0.8730736	0.2207897	SKCM-US	gender	0.01092143	ICGC	TTN	FLG-AS1	protein_coding	none protein_coding	coding:non-coding
0.01034142	0.5451841	0.2126138	SKCM-US	gender	0.03107712	ICGC	DNAH5	LRP1B	protein_coding	protein_coding	coding:coding
0.001550313	0.682717	0.2157018	SKCM-US	gender	0.01452081	ICGC	THSD7B	TTN-AS1	protein_coding	none protein_coding	coding:non-coding
0.0001018074	0.8584712	0.2209	SKCM-US	gender	0.01092143	ICGC	HYDIN	MUC16	protein_coding	protein_coding	coding:coding
0.0004787534	0.7620831	0.2182137	SKCM-US	gender	0.01168747	ICGC	DNAH5	PCLO	protein_coding	protein_coding	coding:coding
0.002496371	0.6530358	0.2159666	SKCM-US	gender	0.0170768	ICGC	THSD7B	MUC16	protein_coding	protein_coding	coding:coding
0.0003827291	0.780522	0.2197592	SKCM-US	gender	0.01115924	ICGC	LRP1B	PCLO	protein_coding	protein_coding	coding:coding
4.625564e-05	0.9135736	0.2242568	SKCM-US	gender	0.01092143	ICGC	TTN	ADGRV1	protein_coding	protein_coding	coding:coding
6.172116e-05	0.89887	0.2243735	SKCM-US	gender	0.01092143	ICGC	MUC16	PCDHA9	protein_coding	protein_coding	coding:coding
0.004117363	0.6249657	0.2178319	SKCM-US	gender	0.02048809	ICGC	DNAH5	ADGRV1	protein_coding	protein_coding	coding:coding
0.0005150123	0.7697491	0.2216493	SKCM-US	gender	0.01168747	ICGC	TTN	PKHD1L1	protein_coding	protein_coding	coding:coding
0.003403502	0.6423706	0.2193342	SKCM-US	gender	0.01883046	ICGC	TTN	MGAM	protein_coding	protein_coding	coding:coding
0.02054814	0.5002992	0.2160013	SKCM-US	gender	0.04551726	ICGC	ZFHX4	TTN-AS1	protein_coding	none protein_coding	coding:non-coding
0.001103651	0.7245887	0.2220841	SKCM-US	gender	0.01341107	ICGC	ZFHX4	MUC16	protein_coding	protein_coding	coding:coding
0.009868877	0.5637955	0.2184924	SKCM-US	gender	0.03005818	ICGC	MXRA5	MUC16	protein_coding	protein_coding	coding:coding
0.000324404	0.8094613	0.2251637	SKCM-US	gender	0.01111244	ICGC	CSMD2	TTN	protein_coding	protein_coding	coding:coding
0.01215878	0.5483171	0.2186706	SKCM-US	gender	0.03381202	ICGC	MUC16	AC005323.2	protein_coding	none protein_coding	coding:non-coding
0.01215878	0.5483171	0.2186706	SKCM-US	gender	0.03381202	ICGC	TTN	FAT4	protein_coding	protein_coding	coding:coding
0.006669896	0.5963861	0.2198341	SKCM-US	gender	0.025351	ICGC	OBSCN	TTN-AS1	protein_coding	none protein_coding	coding:non-coding
0.0002552279	0.8303483	0.2270599	SKCM-US	gender	0.01092143	ICGC	PCLO	FLG-AS1	protein_coding	none protein_coding	coding:non-coding
0.004432468	0.6295818	0.2212457	SKCM-US	gender	0.02120852	ICGC	OBSCN	MUC16	protein_coding	protein_coding	coding:coding
0.0003336207	0.8151627	0.227211	SKCM-US	gender	0.01111244	ICGC	TTN	CSMD1	protein_coding	protein_coding	coding:coding
0.002896142	0.6634186	0.2227319	SKCM-US	gender	0.01761617	ICGC	DNAH5	CSMD1	protein_coding	protein_coding	coding:coding
0.01261874	0.5497108	0.2203822	SKCM-US	gender	0.03436868	ICGC	TTN-AS1	AC005323.2	none protein_coding	none protein_coding	non-coding:non-coding
1.200582e-05	1.038899	0.2373279	SKCM-US	gender	0.0107732	ICGC	DNAH5	FLG-AS1	protein_coding	none protein_coding	coding:non-coding
0.002991557	0.666899	0.2246507	SKCM-US	gender	0.01801061	ICGC	PCDH15	MUC16	protein_coding	protein_coding	coding:coding
0.0007298117	0.7691782	0.2276936	SKCM-US	gender	0.01243407	ICGC	FAT3	MUC16	protein_coding	protein_coding	coding:coding
0.001503929	0.7176946	0.2261222	SKCM-US	gender	0.01430896	ICGC	ANK3	TTN	protein_coding	protein_coding	coding:coding
0.002991557	0.666899	0.2246507	SKCM-US	gender	0.01801061	ICGC	FAT3	TTN-AS1	protein_coding	none protein_coding	coding:non-coding
0.001503929	0.7176946	0.2261222	SKCM-US	gender	0.01430896	ICGC	MUC17	TTN-AS1	protein_coding	none protein_coding	coding:non-coding
0.00715474	0.6010197	0.2234644	SKCM-US	gender	0.02587343	ICGC	DNAH8	TTN	protein_coding	protein_coding	coding:coding
0.000267741	0.8436919	0.2314869	SKCM-US	gender	0.01092143	ICGC	ADGRV1	PCLO	protein_coding	protein_coding	coding:coding
0.000267741	0.8436919	0.2314869	SKCM-US	gender	0.01092143	ICGC	DNAH5	PKHD1L1	protein_coding	protein_coding	coding:coding
0.000119868	0.8977152	0.2333913	SKCM-US	gender	0.01092143	ICGC	DNAH7	TTN	protein_coding	protein_coding	coding:coding
0.005929948	0.6197258	0.2252213	SKCM-US	gender	0.02394604	ICGC	TTN	BRAF	protein_coding	protein_coding	coding:coding
0.001546687	0.7225028	0.2282228	SKCM-US	gender	0.01449968	ICGC	DNAH5	DNAH7	protein_coding	protein_coding	coding:coding
0.01098762	0.5693094	0.223865	SKCM-US	gender	0.03231309	ICGC	PCDH15	TTN-AS1	protein_coding	none protein_coding	coding:non-coding
0.003889309	0.6549638	0.2268664	SKCM-US	gender	0.0202045	ICGC	PCLO	MGAM	protein_coding	protein_coding	coding:coding
0.02386803	0.5033926	0.2228143	SKCM-US	gender	0.04934933	ICGC	ZAN	MUC16	protein_coding	protein_coding	coding:coding
0.007392365	0.6038258	0.2254232	SKCM-US	gender	0.02620457	ICGC	DNAH3	MUC16	protein_coding	protein_coding	coding:coding
0.004886366	0.6390638	0.2270668	SKCM-US	gender	0.02206369	ICGC	DNAH5	CSMD2	protein_coding	protein_coding	coding:coding
0.0005918837	0.7970166	0.2320074	SKCM-US	gender	0.0118691	ICGC	MUC17	MUC16	protein_coding	protein_coding	coding:coding
0.01660937	0.5372294	0.2242902	SKCM-US	gender	0.0397561	ICGC	COL4A4	MUC16	protein_coding	protein_coding	coding:coding
0.0001218588	0.9064508	0.2359101	SKCM-US	gender	0.01092143	ICGC	RYR1	TTN-AS1	protein_coding	none protein_coding	coding:non-coding
0.0004650044	0.8199146	0.2342516	SKCM-US	gender	0.01158025	ICGC	RP1	TTN	protein_coding	protein_coding	coding:coding
0.007625307	0.6069838	0.227486	SKCM-US	gender	0.02620457	ICGC	SPTA1	TTN-AS1	protein_coding	none protein_coding	coding:non-coding
0.00947077	0.590798	0.227705	SKCM-US	gender	0.02981237	ICGC	MUC16	NEB	protein_coding	protein_coding	coding:coding
9.069598e-06	1.091877	0.2460156	SKCM-US	gender	0.0107732	ICGC	MUC16	RYR1	protein_coding	protein_coding	coding:coding
1.228245e-05	1.076399	0.246174	SKCM-US	gender	0.0107732	ICGC	TTN	HYDIN	protein_coding	protein_coding	coding:coding
0.003258066	0.6798106	0.231049	SKCM-US	gender	0.01864516	ICGC	ADGRV1	LRP1B	protein_coding	protein_coding	coding:coding
0.0003629365	0.84372	0.2366236	SKCM-US	gender	0.01111244	ICGC	TTN	PCDHA9	protein_coding	protein_coding	coding:coding
0.02098538	0.5228814	0.2265274	SKCM-US	gender	0.04625033	ICGC	TTN	PCDHGB1	protein_coding	protein_coding	coding:coding
0.02098538	0.5228814	0.2265274	SKCM-US	gender	0.04625033	ICGC	COL4A4	TTN-AS1	protein_coding	none protein_coding	coding:non-coding
4.009441e-05	1.000817	0.2436896	SKCM-US	gender	0.01092143	ICGC	CSMD2	PCLO	protein_coding	protein_coding	coding:coding
0.002072865	0.7175027	0.2329865	SKCM-US	gender	0.01628533	ICGC	CSMD1	PCLO	protein_coding	protein_coding	coding:coding
9.417354e-05	0.942037	0.2412305	SKCM-US	gender	0.01092143	ICGC	PCLO	PKHD1L1	protein_coding	protein_coding	coding:coding
0.01443938	0.5581194	0.2281631	SKCM-US	gender	0.03753104	ICGC	MUC16	RYR2	protein_coding	protein_coding	coding:coding
0.01443938	0.5581194	0.2281631	SKCM-US	gender	0.03753104	ICGC	UNC13C	TTN-AS1	protein_coding	none protein_coding	coding:non-coding
0.001295341	0.7561243	0.2350394	SKCM-US	gender	0.01378686	ICGC	DNAH5	ANK3	protein_coding	protein_coding	coding:coding
0.01772359	0.5416203	0.2284024	SKCM-US	gender	0.04139714	ICGC	PTPRT	TTN-AS1	protein_coding	none protein_coding	coding:non-coding
0.01207237	0.5776254	0.2301276	SKCM-US	gender	0.03358936	ICGC	ASXL3	MUC16	protein_coding	protein_coding	coding:coding
4.903495e-06	1.154042	0.2525878	SKCM-US	gender	0.0107732	ICGC	DNAH7	PCLO	protein_coding	protein_coding	coding:coding
0.0007951651	0.7957401	0.2372177	SKCM-US	gender	0.01251797	ICGC	THSD7B	TTN	protein_coding	protein_coding	coding:coding
0.02166776	0.5250103	0.2286489	SKCM-US	gender	0.04692423	ICGC	MROH2B	TTN-AS1	protein_coding	none protein_coding	coding:non-coding
0.01488127	0.5610154	0.2303723	SKCM-US	gender	0.03795271	ICGC	SPHKAP	MUC16	protein_coding	protein_coding	coding:coding
0.001025876	0.7795542	0.2374277	SKCM-US	gender	0.01320909	ICGC	SCN11A	MUC16	protein_coding	protein_coding	coding:coding
4.020732e-05	1.013668	0.2468577	SKCM-US	gender	0.01092143	ICGC	DNAH5	PCDHA9	protein_coding	protein_coding	coding:coding
0.004213258	0.6686383	0.2336477	SKCM-US	gender	0.02086762	ICGC	RP1	PCLO	protein_coding	protein_coding	coding:coding
0.00269321	0.7072598	0.2356948	SKCM-US	gender	0.01761617	ICGC	LRP2	MUC16	protein_coding	protein_coding	coding:coding
0.0006231098	0.8202354	0.2397403	SKCM-US	gender	0.01196597	ICGC	DNAH5	THSD7B	protein_coding	protein_coding	coding:coding
0.0006231098	0.8202354	0.2397403	SKCM-US	gender	0.01196597	ICGC	OBSCN	TTN	protein_coding	protein_coding	coding:coding
0.0002843177	0.8782466	0.2419956	SKCM-US	gender	0.01092143	ICGC	FAM135B	TTN-AS1	protein_coding	none protein_coding	coding:non-coding
0.0003718858	0.8620608	0.2422015	SKCM-US	gender	0.01111244	ICGC	UNC13C	MUC16	protein_coding	protein_coding	coding:coding
0.00169013	0.7468756	0.237867	SKCM-US	gender	0.014969	ICGC	FAM135B	MUC16	protein_coding	protein_coding	coding:coding
0.0003718858	0.8620608	0.2422015	SKCM-US	gender	0.01111244	ICGC	THSD7B	PCLO	protein_coding	protein_coding	coding:coding
0.003412994	0.6907607	0.2359265	SKCM-US	gender	0.01887311	ICGC	MUC16	SCN10A	protein_coding	protein_coding	coding:coding
0.006637189	0.6355291	0.2341221	SKCM-US	gender	0.025351	ICGC	SCN10A	TTN-AS1	protein_coding	none protein_coding	coding:non-coding
0.002158114	0.7303765	0.2380966	SKCM-US	gender	0.01628533	ICGC	DNAH5	HYDIN	protein_coding	protein_coding	coding:coding
0.01531399	0.5642702	0.2327015	SKCM-US	gender	0.03795271	ICGC	LRP1B	MGAM	protein_coding	protein_coding	coding:coding
0.002158114	0.7303765	0.2380966	SKCM-US	gender	0.01628533	ICGC	ANK3	PCLO	protein_coding	protein_coding	coding:coding
0.0004848874	0.8457737	0.2424136	SKCM-US	gender	0.01168747	ICGC	SCN11A	TTN-AS1	protein_coding	none protein_coding	coding:non-coding
0.004309471	0.6741507	0.2361651	SKCM-US	gender	0.02087131	ICGC	DNAH10	TTN-AS1	protein_coding	none protein_coding	coding:non-coding
0.001717297	0.7544477	0.2406369	SKCM-US	gender	0.014969	ICGC	ADGRV1	CSMD1	protein_coding	protein_coding	coding:coding
0.001717297	0.7544477	0.2406369	SKCM-US	gender	0.014969	ICGC	MUC16	DNAH10	protein_coding	protein_coding	coding:coding
0.0001662476	0.9332152	0.2478361	SKCM-US	gender	0.01092143	ICGC	LRP1B	FLG-AS1	protein_coding	none protein_coding	coding:non-coding
0.01275499	0.5849983	0.2348883	SKCM-US	gender	0.03473085	ICGC	CSMD2	MGAM	protein_coding	protein_coding	coding:coding
0.003481604	0.697042	0.2385766	SKCM-US	gender	0.01907778	ICGC	MMP26	MUC16	protein_coding	protein_coding	coding:coding
0.0001662476	0.9332152	0.2478361	SKCM-US	gender	0.01092143	ICGC	ZFHX4	TTN	protein_coding	protein_coding	coding:coding
0.003481604	0.697042	0.2385766	SKCM-US	gender	0.01907778	ICGC	SYNE1	TTN	protein_coding	protein_coding	coding:coding
0.008484818	0.6236199	0.2369248	SKCM-US	gender	0.0284008	ICGC	CSMD2	ADGRV1	protein_coding	protein_coding	coding:coding
0.0002189136	0.9168237	0.2480499	SKCM-US	gender	0.01092143	ICGC	ADGRV1	FLG-AS1	protein_coding	none protein_coding	coding:non-coding
0.01573533	0.5679089	0.2351592	SKCM-US	gender	0.03882114	ICGC	OR51B5	MUC16	protein_coding	protein_coding	coding:coding
0.001054215	0.7962731	0.243089	SKCM-US	gender	0.01330394	ICGC	CSMD1	PKHD1L1	protein_coding	protein_coding	coding:coding
0.0002189136	0.9168237	0.2480499	SKCM-US	gender	0.01092143	ICGC	MXRA5	TTN	protein_coding	protein_coding	coding:coding
0.004398386	0.6801996	0.2388274	SKCM-US	gender	0.02105496	ICGC	DNAH11	TTN-AS1	protein_coding	none protein_coding	coding:non-coding
0.001356751	0.7795486	0.2433278	SKCM-US	gender	0.01392089	ICGC	MUC16	CACNA1E	protein_coding	protein_coding	coding:coding
0.002793087	0.7208809	0.2411265	SKCM-US	gender	0.01761617	ICGC	CSMD2	LRP1B	protein_coding	protein_coding	coding:coding
5.340221e-05	1.026416	0.2540498	SKCM-US	gender	0.01092143	ICGC	SVEP1	MUC16	protein_coding	protein_coding	coding:coding
0.0006354256	0.8393297	0.2457037	SKCM-US	gender	0.01196597	ICGC	MUC16	PCDHA2	protein_coding	protein_coding	coding:coding
0.01055446	0.6065305	0.2371934	SKCM-US	gender	0.0317083	ICGC	XIRP2	PCLO	protein_coding	protein_coding	coding:coding
0.002793087	0.7208809	0.2411265	SKCM-US	gender	0.01761617	ICGC	DNAH8	PCLO	protein_coding	protein_coding	coding:coding
0.001356751	0.7795486	0.2433278	SKCM-US	gender	0.01392089	ICGC	MMP26	TTN-AS1	protein_coding	none protein_coding	coding:non-coding
0.01307844	0.5893118	0.23747	SKCM-US	gender	0.03521472	ICGC	LRP1B	FAT4	protein_coding	protein_coding	coding:coding
0.01307844	0.5893118	0.23747	SKCM-US	gender	0.03521472	ICGC	MUC16	GRIN2A	protein_coding	protein_coding	coding:coding
0.000376198	0.8837146	0.2484968	SKCM-US	gender	0.01111244	ICGC	DNAH7	LRP1B	protein_coding	protein_coding	coding:coding
0.006943007	0.6461463	0.2393519	SKCM-US	gender	0.02566865	ICGC	FLG-AS1	MGAM	none protein_coding	protein_coding	coding:non-coding
0.003543352	0.7039169	0.2413824	SKCM-US	gender	0.01907778	ICGC	TTN	NEB	protein_coding	protein_coding	coding:coding
0.0001661719	0.946146	0.2512626	SKCM-US	gender	0.01092143	ICGC	PCLO	PCDHA9	protein_coding	protein_coding	coding:coding
7.114193e-05	1.010025	0.2542583	SKCM-US	gender	0.01092143	ICGC	CSMD2	PKHD1L1	protein_coding	protein_coding	coding:coding
0.006943007	0.6461463	0.2393519	SKCM-US	gender	0.02566865	ICGC	SPHKAP	TTN	protein_coding	protein_coding	coding:coding
7.114193e-05	1.010025	0.2542583	SKCM-US	gender	0.01092143	ICGC	SVEP1	TTN-AS1	protein_coding	none protein_coding	coding:non-coding
0.00222457	0.7457422	0.2438271	SKCM-US	gender	0.01628533	ICGC	TTN	AC005323.2	protein_coding	none protein_coding	coding:non-coding
0.0002188816	0.929536	0.2514867	SKCM-US	gender	0.01092143	ICGC	ANK3	ADGRV1	protein_coding	protein_coding	coding:coding
0.004479108	0.6868275	0.241646	SKCM-US	gender	0.02131604	ICGC	TTN	DNAH3	protein_coding	protein_coding	coding:coding
3.963608e-05	1.059099	0.2577139	SKCM-US	gender	0.01092143	ICGC	TTN	FAT3	protein_coding	protein_coding	coding:coding
0.00222457	0.7457422	0.2438271	SKCM-US	gender	0.01628533	ICGC	DNAH7	FLG-AS1	protein_coding	none protein_coding	coding:non-coding
0.004479108	0.6868275	0.241646	SKCM-US	gender	0.02131604	ICGC	DNAH11	MUC16	protein_coding	protein_coding	coding:coding
0.0004909194	0.8669901	0.2487303	SKCM-US	gender	0.01168747	ICGC	TTN	MUC17	protein_coding	protein_coding	coding:coding
0.008674561	0.6289276	0.2396261	SKCM-US	gender	0.02880814	ICGC	LRP1B	PKHD1L1	protein_coding	protein_coding	coding:coding
0.01079696	0.6115755	0.2399086	SKCM-US	gender	0.0320907	ICGC	DNAH5	AC005323.2	protein_coding	none protein_coding	coding:non-coding
0.005641512	0.6696088	0.2419176	SKCM-US	gender	0.02351704	ICGC	CSMD2	CSMD1	protein_coding	protein_coding	coding:coding
0.001370209	0.7887989	0.2464339	SKCM-US	gender	0.01392089	ICGC	DNAH7	CSMD1	protein_coding	protein_coding	coding:coding
0.01984688	0.5544701	0.2380487	SKCM-US	gender	0.04496135	ICGC	TACC2	MUC16	protein_coding	protein_coding	coding:coding
0.01079696	0.6115755	0.2399086	SKCM-US	gender	0.0320907	ICGC	DNAH5	MXRA5	protein_coding	protein_coding	coding:coding
0.001370209	0.7887989	0.2464339	SKCM-US	gender	0.01392089	ICGC	DNAH5	OBSCN	protein_coding	protein_coding	coding:coding
0.005641512	0.6696088	0.2419176	SKCM-US	gender	0.02351704	ICGC	CACNA1E	TTN-AS1	protein_coding	none protein_coding	coding:non-coding
0.01079696	0.6115755	0.2399086	SKCM-US	gender	0.0320907	ICGC	DNAH7	XIRP2	protein_coding	protein_coding	coding:coding
0.0001654839	0.9601909	0.2549223	SKCM-US	gender	0.01092143	ICGC	RP1	ADGRV1	protein_coding	protein_coding	coding:coding
0.01338713	0.5940859	0.2401996	SKCM-US	gender	0.03589799	ICGC	DNAH7	MGAM	protein_coding	protein_coding	coding:coding
1.182333e-05	1.162974	0.2654695	SKCM-US	gender	0.0107732	ICGC	HYDIN	PCLO	protein_coding	protein_coding	coding:coding
0.01338713	0.5940859	0.2401996	SKCM-US	gender	0.03589799	ICGC	PCDHA2	TTN-AS1	protein_coding	none protein_coding	coding:non-coding
0.0002180512	0.9433485	0.255157	SKCM-US	gender	0.01092143	ICGC	ADGRV1	PCDHA9	protein_coding	protein_coding	coding:coding
0.01653421	0.5764544	0.2404994	SKCM-US	gender	0.0397561	ICGC	SYNE1	PCLO	protein_coding	protein_coding	coding:coding
0.004550713	0.6940821	0.2446339	SKCM-US	gender	0.02138458	ICGC	PCDH15	TTN	protein_coding	protein_coding	coding:coding
0.008851128	0.6347671	0.2424857	SKCM-US	gender	0.0292264	ICGC	TACC2	TTN-AS1	protein_coding	none protein_coding	coding:non-coding
0.004550713	0.6940821	0.2446339	SKCM-US	gender	0.02138458	ICGC	CD163	TTN-AS1	protein_coding	none protein_coding	coding:non-coding
0.01102436	0.6171356	0.2427827	SKCM-US	gender	0.03236666	ICGC	DNAH7	ANK3	protein_coding	protein_coding	coding:coding
0.002867794	0.7371387	0.2472322	SKCM-US	gender	0.01761617	ICGC	ANK3	LRP1B	protein_coding	protein_coding	coding:coding
0.001379694	0.7988757	0.2497372	SKCM-US	gender	0.01392089	ICGC	HYDIN	MGAM	protein_coding	protein_coding	coding:coding
0.002867794	0.7371387	0.2472322	SKCM-US	gender	0.01761617	ICGC	ZFHX4	PCLO	protein_coding	protein_coding	coding:coding
0.02034072	0.5586764	0.2408085	SKCM-US	gender	0.04551024	ICGC	ZAN	TTN	protein_coding	protein_coding	coding:coding
0.002867794	0.7371387	0.2472322	SKCM-US	gender	0.01761617	ICGC	USH2A	TTN	protein_coding	protein_coding	coding:coding
0.007203312	0.6589609	0.2452134	SKCM-US	gender	0.02587343	ICGC	DNAH7	CSMD2	protein_coding	protein_coding	coding:coding
0.0008302035	0.8446971	0.2527124	SKCM-US	gender	0.01272779	ICGC	RP1	FLG-AS1	protein_coding	none protein_coding	coding:non-coding
0.007203312	0.6589609	0.2452134	SKCM-US	gender	0.02587343	ICGC	THSD7B	LRP1B	protein_coding	protein_coding	coding:coding
0.007203312	0.6589609	0.2452134	SKCM-US	gender	0.02587343	ICGC	CD163	MUC16	protein_coding	protein_coding	coding:coding
2.875852e-05	1.11314	0.2661054	SKCM-US	gender	0.01092143	ICGC	ZNF831	MUC16	protein_coding	protein_coding	coding:coding
0.0008302035	0.8446971	0.2527124	SKCM-US	gender	0.01272779	ICGC	ADGRV1	PKHD1L1	protein_coding	protein_coding	coding:coding
0.001772064	0.7815236	0.2500082	SKCM-US	gender	0.0152608	ICGC	COL4A4	TTN	protein_coding	protein_coding	coding:coding
6.965157e-05	1.043347	0.2623141	SKCM-US	gender	0.01092143	ICGC	FAM135B	TTN	protein_coding	protein_coding	coding:coding
2.875852e-05	1.11314	0.2661054	SKCM-US	gender	0.01092143	ICGC	ZNF831	TTN-AS1	protein_coding	none protein_coding	coding:non-coding
0.0003753645	0.9092952	0.255648	SKCM-US	gender	0.01111244	ICGC	SI	TTN-AS1	protein_coding	none protein_coding	coding:non-coding
0.002268486	0.764034	0.2502875	SKCM-US	gender	0.01637766	ICGC	PKHD1L1	MGAM	protein_coding	protein_coding	coding:coding
3.84987e-05	1.096298	0.2663303	SKCM-US	gender	0.01092143	ICGC	SI	MUC16	protein_coding	protein_coding	coding:coding
0.004612251	0.7020176	0.2478056	SKCM-US	gender	0.02146705	ICGC	ANK3	PKHD1L1	protein_coding	protein_coding	coding:coding
0.009012811	0.641183	0.2455165	SKCM-US	gender	0.029527	ICGC	CMYA5	TTN-AS1	protein_coding	none protein_coding	coding:non-coding
0.009012811	0.641183	0.2455165	SKCM-US	gender	0.029527	ICGC	DNAH5	USH2A	protein_coding	protein_coding	coding:coding
0.009012811	0.641183	0.2455165	SKCM-US	gender	0.029527	ICGC	DNAH5	ZFHX4	protein_coding	protein_coding	coding:coding
0.02081374	0.5633435	0.2437296	SKCM-US	gender	0.04608633	ICGC	RP1	CSMD1	protein_coding	protein_coding	coding:coding
0.001384942	0.8098554	0.2532562	SKCM-US	gender	0.01392089	ICGC	DNAH5	FAT3	protein_coding	protein_coding	coding:coding
0.0006386748	0.8747244	0.2561692	SKCM-US	gender	0.01196597	ICGC	CSMD1	FLG-AS1	protein_coding	none protein_coding	coding:non-coding
0.0001227036	1.009294	0.2627917	SKCM-US	gender	0.01092143	ICGC	HYDIN	FLG-AS1	protein_coding	none protein_coding	coding:non-coding
0.005818161	0.6842396	0.2481055	SKCM-US	gender	0.02394604	ICGC	RP1	LRP1B	protein_coding	protein_coding	coding:coding
0.0112346	0.6232539	0.2458289	SKCM-US	gender	0.03295649	ICGC	XIRP2	LRP1B	protein_coding	protein_coding	coding:coding
0.005818161	0.6842396	0.2481055	SKCM-US	gender	0.02394604	ICGC	DNAH5	MROH2B	protein_coding	protein_coding	coding:coding
0.002894216	0.7464024	0.2505753	SKCM-US	gender	0.01761617	ICGC	STXBP5L	MUC16	protein_coding	protein_coding	coding:coding
0.0006386748	0.8747244	0.2561692	SKCM-US	gender	0.01196597	ICGC	DNAH5	MUC17	protein_coding	protein_coding	coding:coding
0.0112346	0.6232539	0.2458289	SKCM-US	gender	0.03295649	ICGC	DNAH5	NEB	protein_coding	protein_coding	coding:coding
0.0112346	0.6232539	0.2458289	SKCM-US	gender	0.03295649	ICGC	DNAH5	PCDH15	protein_coding	protein_coding	coding:coding
0.002894216	0.7464024	0.2505753	SKCM-US	gender	0.01761617	ICGC	FAT4	PKHD1L1	protein_coding	protein_coding	coding:coding
5.14168e-05	1.079334	0.266562	SKCM-US	gender	0.01092143	ICGC	TTN	RYR1	protein_coding	protein_coding	coding:coding
0.001384942	0.8098554	0.2532562	SKCM-US	gender	0.01392089	ICGC	APOB	TTN	protein_coding	protein_coding	coding:coding
0.02081374	0.5633435	0.2437296	SKCM-US	gender	0.04608633	ICGC	PRUNE2	TTN-AS1	protein_coding	none protein_coding	coding:non-coding
0.002894216	0.7464024	0.2505753	SKCM-US	gender	0.01761617	ICGC	C6	TTN-AS1	protein_coding	none protein_coding	coding:non-coding
0.007312856	0.6663105	0.2484147	SKCM-US	gender	0.02604282	ICGC	THSD7B	ADGRV1	protein_coding	protein_coding	coding:coding
0.001780212	0.7922238	0.2535406	SKCM-US	gender	0.01527817	ICGC	ANK3	FLG-AS1	protein_coding	none protein_coding	coding:non-coding
0.001780212	0.7922238	0.2535406	SKCM-US	gender	0.01527817	ICGC	PCDHA9	FLG-AS1	protein_coding	none protein_coding	coding:non-coding
0.01395082	0.6051689	0.246151	SKCM-US	gender	0.03669751	ICGC	MED12L	MUC16	protein_coding	protein_coding	coding:coding
0.0001622337	0.992075	0.2630414	SKCM-US	gender	0.01092143	ICGC	FAT3	PCLO	protein_coding	protein_coding	coding:coding
0.001780212	0.7922238	0.2535406	SKCM-US	gender	0.01527817	ICGC	MXRA5	PCLO	protein_coding	protein_coding	coding:coding
0.00915782	0.6482255	0.2487334	SKCM-US	gender	0.029527	ICGC	DNAH5	DNAH3	protein_coding	protein_coding	coding:coding
0.004662758	0.7106954	0.2511776	SKCM-US	gender	0.02161657	ICGC	DNAH7	FAT4	protein_coding	protein_coding	coding:coding
0.0002139353	0.974723	0.2632987	SKCM-US	gender	0.01092143	ICGC	PKHD1L1	FLG-AS1	protein_coding	none protein_coding	coding:non-coding
0.004662758	0.7106954	0.2511776	SKCM-US	gender	0.02161657	ICGC	PRUNE2	MUC16	protein_coding	protein_coding	coding:coding
0.00915782	0.6482255	0.2487334	SKCM-US	gender	0.029527	ICGC	PKHD1L1	PCDHGB1	protein_coding	protein_coding	coding:coding
0.004662758	0.7106954	0.2511776	SKCM-US	gender	0.02161657	ICGC	OBSCN	PCLO	protein_coding	protein_coding	coding:coding
1.526814e-05	1.192157	0.2756569	SKCM-US	gender	0.0107732	ICGC	MUC16	TENM3	protein_coding	protein_coding	coding:coding
0.01725683	0.5869228	0.246483	SKCM-US	gender	0.04058799	ICGC	NPAP1	TTN-AS1	protein_coding	none protein_coding	coding:non-coding
0.0004874302	0.9063091	0.2598683	SKCM-US	gender	0.01168747	ICGC	TENM3	TTN-AS1	protein_coding	none protein_coding	coding:non-coding
0.002912558	0.7565168	0.254136	SKCM-US	gender	0.01761617	ICGC	MUC16	AHNAK2	protein_coding	protein_coding	coding:coding
0.02126255	0.5685106	0.2468255	SKCM-US	gender	0.04625033	ICGC	TTN	MROH2B	protein_coding	protein_coding	coding:coding
0.01142551	0.6299795	0.249062	SKCM-US	gender	0.03335933	ICGC	ADAMTS20	MUC16	protein_coding	protein_coding	coding:coding
0.002912558	0.7565168	0.254136	SKCM-US	gender	0.01761617	ICGC	C6	MUC16	protein_coding	protein_coding	coding:coding
0.001385705	0.8218253	0.2570122	SKCM-US	gender	0.01392089	ICGC	DNAH5	PCDHA2	protein_coding	protein_coding	coding:coding
0.0002813605	0.9572334	0.2635639	SKCM-US	gender	0.01092143	ICGC	LRP1B	PCDHA9	protein_coding	protein_coding	coding:coding
0.02126255	0.5685106	0.2468255	SKCM-US	gender	0.04625033	ICGC	FLG-AS1	PCDHGB1	none protein_coding	protein_coding	coding:non-coding
0.00588724	0.6926104	0.2514928	SKCM-US	gender	0.02394604	ICGC	DNAH5	SPTA1	protein_coding	protein_coding	coding:coding
0.00588724	0.6926104	0.2514928	SKCM-US	gender	0.02394604	ICGC	LRP2	TTN	protein_coding	protein_coding	coding:coding
0.002912558	0.7565168	0.254136	SKCM-US	gender	0.01761617	ICGC	ASXL3	TTN	protein_coding	protein_coding	coding:coding
0.00588724	0.6926104	0.2514928	SKCM-US	gender	0.02394604	ICGC	DMBT1	TTN-AS1	protein_coding	none protein_coding	coding:non-coding
0.02126255	0.5685106	0.2468255	SKCM-US	gender	0.04625033	ICGC	COL5A1	TTN-AS1	protein_coding	none protein_coding	coding:non-coding
0.01420074	0.6115672	0.2494009	SKCM-US	gender	0.03721234	ICGC	LRP1B	AC005323.2	protein_coding	none protein_coding	coding:non-coding
0.003706718	0.7384318	0.2544475	SKCM-US	gender	0.0196256	ICGC	PCLO	AC005323.2	protein_coding	none protein_coding	coding:non-coding
0.007406661	0.6743643	0.2518178	SKCM-US	gender	0.02620457	ICGC	DNAH8	CSMD1	protein_coding	protein_coding	coding:coding
0.01420074	0.6115672	0.2494009	SKCM-US	gender	0.03721234	ICGC	MUC16	DMBT1	protein_coding	protein_coding	coding:coding
0.01420074	0.6115672	0.2494009	SKCM-US	gender	0.03721234	ICGC	ADGRV1	DSCAM	protein_coding	protein_coding	coding:coding
0.007406661	0.6743643	0.2518178	SKCM-US	gender	0.02620457	ICGC	MXRA5	FLG-AS1	protein_coding	none protein_coding	coding:non-coding
0.001782742	0.8038962	0.2573106	SKCM-US	gender	0.01527817	ICGC	DNAH8	FLG-AS1	protein_coding	none protein_coding	coding:non-coding
0.0008255961	0.8708996	0.2604312	SKCM-US	gender	0.01272779	ICGC	MXRA5	LRP1B	protein_coding	protein_coding	coding:coding
0.007406661	0.6743643	0.2518178	SKCM-US	gender	0.02620457	ICGC	MUC16	NPAP1	protein_coding	protein_coding	coding:coding
0.003706718	0.7384318	0.2544475	SKCM-US	gender	0.0196256	ICGC	SPHKAP	PCLO	protein_coding	protein_coding	coding:coding
0.001782742	0.8038962	0.2573106	SKCM-US	gender	0.01527817	ICGC	NEB	PCLO	protein_coding	protein_coding	coding:coding
0.0008255961	0.8708996	0.2604312	SKCM-US	gender	0.01272779	ICGC	RP1	PKHD1L1	protein_coding	protein_coding	coding:coding
0.007406661	0.6743643	0.2518178	SKCM-US	gender	0.02620457	ICGC	AHNAK2	TTN-AS1	protein_coding	none protein_coding	coding:non-coding
0.0002106438	0.9925527	0.2678306	SKCM-US	gender	0.01092143	ICGC	HYDIN	ADGRV1	protein_coding	protein_coding	coding:coding
0.004701255	0.7201857	0.2547687	SKCM-US	gender	0.02169999	ICGC	MXRA5	ADGRV1	protein_coding	protein_coding	coding:coding
0.01758212	0.5929832	0.2497505	SKCM-US	gender	0.04127976	ICGC	DNAH3	ADGRV1	protein_coding	protein_coding	coding:coding
0.000482687	0.9218238	0.2641189	SKCM-US	gender	0.01168747	ICGC	DNAH5	COL4A4	protein_coding	protein_coding	coding:coding
0.004701255	0.7201857	0.2547687	SKCM-US	gender	0.02169999	ICGC	DNAH9	CSMD2	protein_coding	protein_coding	coding:coding
0.0002106438	0.9925527	0.2678306	SKCM-US	gender	0.01092143	ICGC	TTN	DNAH10	protein_coding	protein_coding	coding:coding
0.000482687	0.9218238	0.2641189	SKCM-US	gender	0.01168747	ICGC	HYDIN	LRP1B	protein_coding	protein_coding	coding:coding
0.001069695	0.8529705	0.2607257	SKCM-US	gender	0.01330394	ICGC	PCDH15	PCLO	protein_coding	protein_coding	coding:coding
0.000482687	0.9218238	0.2641189	SKCM-US	gender	0.01168747	ICGC	DNAH7	PKHD1L1	protein_coding	protein_coding	coding:coding
0.004701255	0.7201857	0.2547687	SKCM-US	gender	0.02169999	ICGC	TTN	RYR2	protein_coding	protein_coding	coding:coding
0.0002106438	0.9925527	0.2678306	SKCM-US	gender	0.01092143	ICGC	TTN	SCN10A	protein_coding	protein_coding	coding:coding
0.001069695	0.8529705	0.2607257	SKCM-US	gender	0.01330394	ICGC	TTN	SCN11A	protein_coding	protein_coding	coding:coding
0.002286188	0.7858112	0.2576183	SKCM-US	gender	0.01644936	ICGC	DNAH5	SPHKAP	protein_coding	protein_coding	coding:coding
0.004701255	0.7201857	0.2547687	SKCM-US	gender	0.02169999	ICGC	ADAMTS20	TTN-AS1	protein_coding	none protein_coding	coding:non-coding
0.001069695	0.8529705	0.2607257	SKCM-US	gender	0.01330394	ICGC	COL3A1	TTN-AS1	protein_coding	none protein_coding	coding:non-coding
0.001381759	0.8348855	0.2610294	SKCM-US	gender	0.01392089	ICGC	USH2A	ADGRV1	protein_coding	protein_coding	coding:coding
0.0115948	0.6373681	0.2524988	SKCM-US	gender	0.03347604	ICGC	DNAH8	ADGRV1	protein_coding	protein_coding	coding:coding
0.005941848	0.7017735	0.2551001	SKCM-US	gender	0.02396162	ICGC	RP1	ANK3	protein_coding	protein_coding	coding:coding
0.002922241	0.7675651	0.2579356	SKCM-US	gender	0.01761617	ICGC	THSD7B	CSMD1	protein_coding	protein_coding	coding:coding
0.0002771706	0.9747747	0.2681081	SKCM-US	gender	0.01092143	ICGC	RP1	CSMD2	protein_coding	protein_coding	coding:coding
0.02168345	0.5742219	0.2501111	SKCM-US	gender	0.04692423	ICGC	DNAH8	FAT4	protein_coding	protein_coding	coding:coding
0.005941848	0.7017735	0.2551001	SKCM-US	gender	0.02396162	ICGC	APOB	FLG-AS1	protein_coding	none protein_coding	coding:non-coding
0.02168345	0.5742219	0.2501111	SKCM-US	gender	0.04692423	ICGC	ANK3	MGAM	protein_coding	protein_coding	coding:coding
0.02168345	0.5742219	0.2501111	SKCM-US	gender	0.04692423	ICGC	COL5A1	MUC16	protein_coding	protein_coding	coding:coding
0.0115948	0.6373681	0.2524988	SKCM-US	gender	0.03347604	ICGC	ABCA13	MUC16	protein_coding	protein_coding	coding:coding
0.0001182946	1.047733	0.2721642	SKCM-US	gender	0.01092143	ICGC	COL3A1	MUC16	protein_coding	protein_coding	coding:coding
0.001381759	0.8348855	0.2610294	SKCM-US	gender	0.01392089	ICGC	APOB	PCLO	protein_coding	protein_coding	coding:coding
0.0002771706	0.9747747	0.2681081	SKCM-US	gender	0.01092143	ICGC	THSD7B	PKHD1L1	protein_coding	protein_coding	coding:coding
0.0006295736	0.9038948	0.2644094	SKCM-US	gender	0.01196597	ICGC	ADGRV1	RYR1	protein_coding	protein_coding	coding:coding
0.001381759	0.8348855	0.2610294	SKCM-US	gender	0.01392089	ICGC	UNC13C	TTN	protein_coding	protein_coding	coding:coding
0.0115948	0.6373681	0.2524988	SKCM-US	gender	0.03347604	ICGC	DNAH5	UNC13C	protein_coding	protein_coding	coding:coding
0.001779348	0.8166394	0.2613426	SKCM-US	gender	0.01527817	ICGC	APOB	ADGRV1	protein_coding	protein_coding	coding:coding
0.01442573	0.6186068	0.2528555	SKCM-US	gender	0.037514	ICGC	CSMD2	ANK3	protein_coding	protein_coding	coding:coding
0.00748317	0.6831895	0.2554418	SKCM-US	gender	0.02620457	ICGC	HYDIN	CSMD1	protein_coding	protein_coding	coding:coding
0.0001565015	1.029955	0.2724373	SKCM-US	gender	0.01092143	ICGC	DNAH5	FAM135B	protein_coding	protein_coding	coding:coding
0.00748317	0.6831895	0.2554418	SKCM-US	gender	0.02620457	ICGC	CSMD2	HYDIN	protein_coding	protein_coding	coding:coding
0.003722851	0.7491529	0.2582629	SKCM-US	gender	0.0196256	ICGC	PCDHA9	MGAM	protein_coding	protein_coding	coding:coding
0.003722851	0.7491529	0.2582629	SKCM-US	gender	0.0196256	ICGC	THSD7B	MGAM	protein_coding	protein_coding	coding:coding
0.01442573	0.6186068	0.2528555	SKCM-US	gender	0.037514	ICGC	MYH2	MUC16	protein_coding	protein_coding	coding:coding
2.674516e-05	1.183383	0.2817884	SKCM-US	gender	0.01092143	ICGC	CSMD1	PCDHA9	protein_coding	protein_coding	coding:coding
0.0003637517	0.9568457	0.2683942	SKCM-US	gender	0.01111244	ICGC	USH2A	PCLO	protein_coding	protein_coding	coding:coding
0.01442573	0.6186068	0.2528555	SKCM-US	gender	0.037514	ICGC	LRP2	PCLO	protein_coding	protein_coding	coding:coding
0.01442573	0.6186068	0.2528555	SKCM-US	gender	0.037514	ICGC	DNAH5	PTPRT	protein_coding	protein_coding	coding:coding
0.01787904	0.5996623	0.2532236	SKCM-US	gender	0.041681	ICGC	USH2A	ANK3	protein_coding	protein_coding	coding:coding
0.009390274	0.6644282	0.2557944	SKCM-US	gender	0.02963228	ICGC	CSMD2	BRAF	protein_coding	protein_coding	coding:coding
0.01787904	0.5996623	0.2532236	SKCM-US	gender	0.041681	ICGC	DNAH7	DNAH8	protein_coding	protein_coding	coding:coding
0.01787904	0.5996623	0.2532236	SKCM-US	gender	0.041681	ICGC	ANK3	FAT4	protein_coding	protein_coding	coding:coding
0.001061839	0.8675637	0.2650176	SKCM-US	gender	0.01330394	ICGC	MUC17	FLG-AS1	protein_coding	none protein_coding	coding:non-coding
0.01787904	0.5996623	0.2532236	SKCM-US	gender	0.041681	ICGC	DNAH5	GRIN2A	protein_coding	protein_coding	coding:coding
0.002284129	0.7982272	0.2616655	SKCM-US	gender	0.01644573	ICGC	DNAH5	MMP26	protein_coding	protein_coding	coding:coding
8.702335e-05	1.087597	0.2771523	SKCM-US	gender	0.01092143	ICGC	TTN	MMP26	protein_coding	protein_coding	coding:coding
0.009390274	0.6644282	0.2557944	SKCM-US	gender	0.02963228	ICGC	COL22A1	MUC16	protein_coding	protein_coding	coding:coding
0.002284129	0.7982272	0.2616655	SKCM-US	gender	0.01644573	ICGC	LRP1B	MUC17	protein_coding	protein_coding	coding:coding
0.0002065445	1.012026	0.2727189	SKCM-US	gender	0.01092143	ICGC	TTN	OR51B5	protein_coding	protein_coding	coding:coding
0.001061839	0.8675637	0.2650176	SKCM-US	gender	0.01330394	ICGC	DNAH5	OR51B5	protein_coding	protein_coding	coding:coding
8.702335e-05	1.087597	0.2771523	SKCM-US	gender	0.01092143	ICGC	DNAH7	PCDHA9	protein_coding	protein_coding	coding:coding
0.001061839	0.8675637	0.2650176	SKCM-US	gender	0.01330394	ICGC	UNC13C	PCLO	protein_coding	protein_coding	coding:coding
0.0002065445	1.012026	0.2727189	SKCM-US	gender	0.01092143	ICGC	MUC17	PCLO	protein_coding	protein_coding	coding:coding
1.442209e-05	1.246811	0.2874602	SKCM-US	gender	0.0107732	ICGC	TTN	SVEP1	protein_coding	protein_coding	coding:coding
0.001061839	0.8675637	0.2650176	SKCM-US	gender	0.01330394	ICGC	DNAH11	TTN	protein_coding	protein_coding	coding:coding
0.001372913	0.8491514	0.2653361	SKCM-US	gender	0.01392089	ICGC	TTN	CACNA1E	protein_coding	protein_coding	coding:coding
0.001372913	0.8491514	0.2653361	SKCM-US	gender	0.01392089	ICGC	CSMD2	FLG-AS1	protein_coding	none protein_coding	coding:non-coding
0.0002719138	0.9939406	0.2730092	SKCM-US	gender	0.01092143	ICGC	FAT3	FLG-AS1	protein_coding	none protein_coding	coding:non-coding
0.0001154246	1.069668	0.2774291	SKCM-US	gender	0.01092143	ICGC	THSD7B	FLG-AS1	protein_coding	none protein_coding	coding:non-coding
0.0002719138	0.9939406	0.2730092	SKCM-US	gender	0.01092143	ICGC	TTN	GRIN2A	protein_coding	protein_coding	coding:coding
0.002922712	0.7796432	0.2619987	SKCM-US	gender	0.01761617	ICGC	FAT3	MGAM	protein_coding	protein_coding	coding:coding
0.005980728	0.7118076	0.2589487	SKCM-US	gender	0.02404103	ICGC	UNC79	MUC16	protein_coding	protein_coding	coding:coding
0.005980728	0.7118076	0.2589487	SKCM-US	gender	0.02404103	ICGC	LRP1B	NEB	protein_coding	protein_coding	coding:coding
0.01174007	0.6454837	0.2561583	SKCM-US	gender	0.03347604	ICGC	SPTA1	PCLO	protein_coding	protein_coding	coding:coding
4.774639e-05	1.147974	0.2823076	SKCM-US	gender	0.01092143	ICGC	PCDHA9	PKHD1L1	protein_coding	protein_coding	coding:coding
0.000621462	0.9205146	0.2689935	SKCM-US	gender	0.01196597	ICGC	DNAH9	PKHD1L1	protein_coding	protein_coding	coding:coding
0.0001154246	1.069668	0.2774291	SKCM-US	gender	0.01092143	ICGC	DNAH5	RYR1	protein_coding	protein_coding	coding:coding
0.000621462	0.9205146	0.2689935	SKCM-US	gender	0.01196597	ICGC	DNAH5	SCN11A	protein_coding	protein_coding	coding:coding
0.01174007	0.6454837	0.2561583	SKCM-US	gender	0.03347604	ICGC	CSMD2	THSD7B	protein_coding	protein_coding	coding:coding
0.005980728	0.7118076	0.2589487	SKCM-US	gender	0.02404103	ICGC	ANKRD30A	TTN-AS1	protein_coding	none protein_coding	coding:non-coding
0.002922712	0.7796432	0.2619987	SKCM-US	gender	0.01761617	ICGC	UNC79	TTN-AS1	protein_coding	none protein_coding	coding:non-coding
0.003727607	0.7608819	0.2623425	SKCM-US	gender	0.0196256	ICGC	ADGRV1	FAT3	protein_coding	protein_coding	coding:coding
0.01462288	0.6263497	0.2565339	SKCM-US	gender	0.03777606	ICGC	RP1	FAT4	protein_coding	protein_coding	coding:coding
0.001769756	0.8305675	0.2656647	SKCM-US	gender	0.01525334	ICGC	ZFHX4	FLG-AS1	protein_coding	none protein_coding	coding:non-coding
0.007540791	0.692863	0.2593082	SKCM-US	gender	0.02620457	ICGC	USH2A	LRP1B	protein_coding	protein_coding	coding:coding
0.0008089503	0.9021023	0.2693073	SKCM-US	gender	0.01267012	ICGC	MUC17	MGAM	protein_coding	protein_coding	coding:coding
0.01462288	0.6263497	0.2565339	SKCM-US	gender	0.03777606	ICGC	TTN	PCDHA2	protein_coding	protein_coding	coding:coding
0.003727607	0.7608819	0.2623425	SKCM-US	gender	0.0196256	ICGC	DNAH8	PKHD1L1	protein_coding	protein_coding	coding:coding
0.007540791	0.692863	0.2593082	SKCM-US	gender	0.02620457	ICGC	MUC16	RGPD4	protein_coding	protein_coding	coding:coding
0.0003570677	0.9756946	0.2733087	SKCM-US	gender	0.01111244	ICGC	CRB1	TTN-AS1	protein_coding	none protein_coding	coding:non-coding
0.001050024	0.8835184	0.269631	SKCM-US	gender	0.01330394	ICGC	OBSCN	ADGRV1	protein_coding	protein_coding	coding:coding
0.001050024	0.8835184	0.269631	SKCM-US	gender	0.01330394	ICGC	SPTA1	ADGRV1	protein_coding	protein_coding	coding:coding
0.009473774	0.6737291	0.2596792	SKCM-US	gender	0.02981237	ICGC	HYDIN	BRAF	protein_coding	protein_coding	coding:coding
0.01814404	0.6070199	0.2569217	SKCM-US	gender	0.04203032	ICGC	MUC16	COL4A5	protein_coding	protein_coding	coding:coding
0.01814404	0.6070199	0.2569217	SKCM-US	gender	0.04203032	ICGC	DNAH7	DNAH3	protein_coding	protein_coding	coding:coding
0.0002016647	1.033337	0.2780088	SKCM-US	gender	0.01092143	ICGC	FAM135B	FLG-AS1	protein_coding	none protein_coding	coding:non-coding
0.009473774	0.6737291	0.2596792	SKCM-US	gender	0.02981237	ICGC	SPHKAP	FLG-AS1	protein_coding	none protein_coding	coding:non-coding
0.002274281	0.8118062	0.2660037	SKCM-US	gender	0.01639713	ICGC	DNAH7	HYDIN	protein_coding	protein_coding	coding:coding
0.001050024	0.8835184	0.269631	SKCM-US	gender	0.01330394	ICGC	ANK3	HYDIN	protein_coding	protein_coding	coding:coding
0.01814404	0.6070199	0.2569217	SKCM-US	gender	0.04203032	ICGC	OBSCN	LRP1B	protein_coding	protein_coding	coding:coding
0.0004676815	0.9572823	0.2736175	SKCM-US	gender	0.01159237	ICGC	ADGRV1	NEB	protein_coding	protein_coding	coding:coding
0.001050024	0.8835184	0.269631	SKCM-US	gender	0.01330394	ICGC	FAT4	PCDHA9	protein_coding	protein_coding	coding:coding
0.009473774	0.6737291	0.2596792	SKCM-US	gender	0.02981237	ICGC	ZAN	PCLO	protein_coding	protein_coding	coding:coding
0.0004676815	0.9572823	0.2736175	SKCM-US	gender	0.01159237	ICGC	HYDIN	PKHD1L1	protein_coding	protein_coding	coding:coding
0.004738326	0.7419373	0.2626973	SKCM-US	gender	0.02175724	ICGC	TTN	PTPRT	protein_coding	protein_coding	coding:coding
3.463759e-05	1.193473	0.2882356	SKCM-US	gender	0.01092143	ICGC	PCLO	RYR1	protein_coding	protein_coding	coding:coding
0.001050024	0.8835184	0.269631	SKCM-US	gender	0.01330394	ICGC	DNAH5	SCN10A	protein_coding	protein_coding	coding:coding
0.002274281	0.8118062	0.2660037	SKCM-US	gender	0.01639713	ICGC	STXBP5L	TTN	protein_coding	protein_coding	coding:coding
0.009473774	0.6737291	0.2596792	SKCM-US	gender	0.02981237	ICGC	MYH2	TTN-AS1	protein_coding	none protein_coding	coding:non-coding
0.004738326	0.7419373	0.2626973	SKCM-US	gender	0.02175724	ICGC	ZDBF2	TTN-AS1	protein_coding	none protein_coding	coding:non-coding
0.009473774	0.6737291	0.2596792	SKCM-US	gender	0.02981237	ICGC	RGPD4	TTN-AS1	protein_coding	none protein_coding	coding:non-coding
0.001359008	0.8647571	0.2699651	SKCM-US	gender	0.01392089	ICGC	OBSCN	CSMD1	protein_coding	protein_coding	coding:coding
0.0002656194	1.014925	0.2783125	SKCM-US	gender	0.01092143	ICGC	HYDIN	FAT3	protein_coding	protein_coding	coding:coding
0.0001121478	1.093713	0.2831485	SKCM-US	gender	0.01092143	ICGC	OBSCN	FLG-AS1	protein_coding	none protein_coding	coding:non-coding
0.001359008	0.8647571	0.2699651	SKCM-US	gender	0.01392089	ICGC	ZFHX4	LRP1B	protein_coding	protein_coding	coding:coding
0.02242551	0.5874877	0.2573221	SKCM-US	gender	0.04761316	ICGC	PCDH15	LRP1B	protein_coding	protein_coding	coding:coding
0.02242551	0.5874877	0.2573221	SKCM-US	gender	0.04761316	ICGC	OBSCN	MGAM	protein_coding	protein_coding	coding:coding
0.02242551	0.5874877	0.2573221	SKCM-US	gender	0.04761316	ICGC	SORL1	MUC16	protein_coding	protein_coding	coding:coding
4.621485e-05	1.175388	0.2885103	SKCM-US	gender	0.01092143	ICGC	FAM135B	PCLO	protein_coding	protein_coding	coding:coding
0.001359008	0.8647571	0.2699651	SKCM-US	gender	0.01392089	ICGC	MECOM	TTN-AS1	protein_coding	none protein_coding	coding:non-coding
0.006002627	0.7228034	0.2630636	SKCM-US	gender	0.02405247	ICGC	ZNF804A	TTN-AS1	protein_coding	none protein_coding	coding:non-coding
0.007577907	0.7034736	0.2634417	SKCM-US	gender	0.02620457	ICGC	ADGRV1	CNTNAP2	protein_coding	protein_coding	coding:coding
0.01478909	0.6348671	0.2604579	SKCM-US	gender	0.03795271	ICGC	RP1	DNAH7	protein_coding	protein_coding	coding:coding
0.003720281	0.7737277	0.2667149	SKCM-US	gender	0.0196256	ICGC	CSMD2	FAT3	protein_coding	protein_coding	coding:coding
0.001753736	0.8458125	0.2703099	SKCM-US	gender	0.01512758	ICGC	HYDIN	FAT4	protein_coding	protein_coding	coding:coding
0.001753736	0.8458125	0.2703099	SKCM-US	gender	0.01512758	ICGC	FAT3	LRP1B	protein_coding	protein_coding	coding:coding
0.01478909	0.6348671	0.2604579	SKCM-US	gender	0.03795271	ICGC	SPTA1	LRP1B	protein_coding	protein_coding	coding:coding
0.003720281	0.7737277	0.2667149	SKCM-US	gender	0.0196256	ICGC	DNAH3	LRP1B	protein_coding	protein_coding	coding:coding
0.007577907	0.7034736	0.2634417	SKCM-US	gender	0.02620457	ICGC	COL4A4	LRP1B	protein_coding	protein_coding	coding:coding
0.0007959743	0.919937	0.274265	SKCM-US	gender	0.01251797	ICGC	ANKRD30A	MUC16	protein_coding	protein_coding	coding:coding
0.0007959743	0.919937	0.274265	SKCM-US	gender	0.01251797	ICGC	COL21A1	MUC16	protein_coding	protein_coding	coding:coding
0.0007959743	0.919937	0.274265	SKCM-US	gender	0.01251797	ICGC	PCDHB7	MUC16	protein_coding	protein_coding	coding:coding
0.007577907	0.7034736	0.2634417	SKCM-US	gender	0.02620457	ICGC	ADAMTS18	MUC16	protein_coding	protein_coding	coding:coding
0.003720281	0.7737277	0.2667149	SKCM-US	gender	0.0196256	ICGC	MYO18B	MUC16	protein_coding	protein_coding	coding:coding
6.154415e-05	1.157142	0.2887937	SKCM-US	gender	0.01092143	ICGC	ANK3	PCDHA9	protein_coding	protein_coding	coding:coding
0.0003490101	0.9963409	0.2786257	SKCM-US	gender	0.01111244	ICGC	DNAH11	PCLO	protein_coding	protein_coding	coding:coding
0.003720281	0.7737277	0.2667149	SKCM-US	gender	0.0196256	ICGC	DNAH3	PCLO	protein_coding	protein_coding	coding:coding
0.001753736	0.8458125	0.2703099	SKCM-US	gender	0.01512758	ICGC	SCN11A	PCLO	protein_coding	protein_coding	coding:coding
0.0003490101	0.9963409	0.2786257	SKCM-US	gender	0.01111244	ICGC	OBSCN	PKHD1L1	protein_coding	protein_coding	coding:coding
0.0001484409	1.075301	0.2834467	SKCM-US	gender	0.01092143	ICGC	TTN	TENM3	protein_coding	protein_coding	coding:coding
0.0003490101	0.9963409	0.2786257	SKCM-US	gender	0.01111244	ICGC	C6	TTN	protein_coding	protein_coding	coding:coding
4.016095e-06	1.424134	0.3088861	SKCM-US	gender	0.0107732	ICGC	ZNF831	TTN	protein_coding	protein_coding	coding:coding
0.003720281	0.7737277	0.2667149	SKCM-US	gender	0.0196256	ICGC	MYO18B	TTN-AS1	protein_coding	none protein_coding	coding:non-coding
0.0007959743	0.919937	0.274265	SKCM-US	gender	0.01251797	ICGC	PCDHB7	TTN-AS1	protein_coding	none protein_coding	coding:non-coding
0.01837338	0.6151253	0.2608667	SKCM-US	gender	0.04234115	ICGC	LRP2	ADGRV1	protein_coding	protein_coding	coding:coding
0.004734991	0.7543979	0.2670879	SKCM-US	gender	0.02175724	ICGC	DNAH5	CACNA1E	protein_coding	protein_coding	coding:coding
0.004734991	0.7543979	0.2670879	SKCM-US	gender	0.02175724	ICGC	ZFHX4	CSMD1	protein_coding	protein_coding	coding:coding
0.01837338	0.6151253	0.2608667	SKCM-US	gender	0.04234115	ICGC	USH2A	DNAH7	protein_coding	protein_coding	coding:coding
0.002256308	0.8266786	0.2706658	SKCM-US	gender	0.01630086	ICGC	SPTA1	FLG-AS1	protein_coding	none protein_coding	coding:non-coding
0.004734991	0.7543979	0.2670879	SKCM-US	gender	0.02175724	ICGC	USH2A	FLG-AS1	protein_coding	none protein_coding	coding:non-coding
3.342267e-05	1.223997	0.2950245	SKCM-US	gender	0.01092143	ICGC	DNAH8	HYDIN	protein_coding	protein_coding	coding:coding
0.004734991	0.7543979	0.2670879	SKCM-US	gender	0.02175724	ICGC	ADGRV1	MROH2B	protein_coding	protein_coding	coding:coding
0.004734991	0.7543979	0.2670879	SKCM-US	gender	0.02175724	ICGC	ACAN	MUC16	protein_coding	protein_coding	coding:coding
0.009532729	0.6839414	0.2638323	SKCM-US	gender	0.02989202	ICGC	ZNF804A	MUC16	protein_coding	protein_coding	coding:coding
0.002256308	0.8266786	0.2706658	SKCM-US	gender	0.01630086	ICGC	MECOM	MUC16	protein_coding	protein_coding	coding:coding
0.001034189	0.9009925	0.2746044	SKCM-US	gender	0.01328381	ICGC	DNAH7	MUC17	protein_coding	protein_coding	coding:coding
0.002256308	0.8266786	0.2706658	SKCM-US	gender	0.01630086	ICGC	CSMD2	OBSCN	protein_coding	protein_coding	coding:coding
8.179879e-05	1.138729	0.289086	SKCM-US	gender	0.01092143	ICGC	THSD7B	PCDHA9	protein_coding	protein_coding	coding:coding
0.01837338	0.6151253	0.2608667	SKCM-US	gender	0.04234115	ICGC	COL4A4	PCLO	protein_coding	protein_coding	coding:coding
0.002256308	0.8266786	0.2706658	SKCM-US	gender	0.01630086	ICGC	CNTNAP2	PCLO	protein_coding	protein_coding	coding:coding
0.0004574487	0.9775796	0.278949	SKCM-US	gender	0.01158025	ICGC	GRIN2A	PCLO	protein_coding	protein_coding	coding:coding
0.009532729	0.6839414	0.2638323	SKCM-US	gender	0.02989202	ICGC	PCDH18	TTN-AS1	protein_coding	none protein_coding	coding:non-coding
0.009532729	0.6839414	0.2638323	SKCM-US	gender	0.02989202	ICGC	CD163L1	TTN-AS1	protein_coding	none protein_coding	coding:non-coding
0.0004574487	0.9775796	0.278949	SKCM-US	gender	0.01158025	ICGC	ERICH3	TTN-AS1	protein_coding	none protein_coding	coding:non-coding
0.001034189	0.9009925	0.2746044	SKCM-US	gender	0.01328381	ICGC	CNTN5	TTN-AS1	protein_coding	none protein_coding	coding:non-coding
0.01837338	0.6151253	0.2608667	SKCM-US	gender	0.04234115	ICGC	PTPRD	TTN-AS1	protein_coding	none protein_coding	coding:non-coding
0.004734991	0.7543979	0.2670879	SKCM-US	gender	0.02175724	ICGC	MUC16	ZDBF2	protein_coding	protein_coding	coding:coding
0.01194848	0.6641996	0.2642358	SKCM-US	gender	0.03347604	ICGC	DNAH9	ADGRV1	protein_coding	protein_coding	coding:coding
0.002893982	0.8073488	0.2710334	SKCM-US	gender	0.01761617	ICGC	PCDH15	ADGRV1	protein_coding	protein_coding	coding:coding
0.01194848	0.6641996	0.2642358	SKCM-US	gender	0.03347604	ICGC	ZFHX4	ADGRV1	protein_coding	protein_coding	coding:coding
0.002893982	0.8073488	0.2710334	SKCM-US	gender	0.01761617	ICGC	TTN	CD163	protein_coding	protein_coding	coding:coding
0.01194848	0.6641996	0.2642358	SKCM-US	gender	0.03347604	ICGC	APOB	CSMD1	protein_coding	protein_coding	coding:coding
0.001339936	0.8818585	0.2749547	SKCM-US	gender	0.01379561	ICGC	ADGRV1	DNAH10	protein_coding	protein_coding	coding:coding
0.0060063	0.7348656	0.2674731	SKCM-US	gender	0.02405247	ICGC	MXRA5	DNAH7	protein_coding	protein_coding	coding:coding
0.0060063	0.7348656	0.2674731	SKCM-US	gender	0.02405247	ICGC	RP1	FAT3	protein_coding	protein_coding	coding:coding
0.01194848	0.6641996	0.2642358	SKCM-US	gender	0.03347604	ICGC	DSCAM	FLG-AS1	protein_coding	none protein_coding	coding:non-coding
0.02273791	0.5951668	0.2612891	SKCM-US	gender	0.04815316	ICGC	SPHKAP	LRP1B	protein_coding	protein_coding	coding:coding
0.02273791	0.5951668	0.2612891	SKCM-US	gender	0.04815316	ICGC	SPTA1	MGAM	protein_coding	protein_coding	coding:coding
0.0005980667	0.958635	0.2792827	SKCM-US	gender	0.0118691	ICGC	CRB1	MUC16	protein_coding	protein_coding	coding:coding
0.0002583355	1.037956	0.2840717	SKCM-US	gender	0.01092143	ICGC	CNTN5	MUC16	protein_coding	protein_coding	coding:coding
0.0060063	0.7348656	0.2674731	SKCM-US	gender	0.02405247	ICGC	CSMD2	MUC17	protein_coding	protein_coding	coding:coding
0.0060063	0.7348656	0.2674731	SKCM-US	gender	0.02405247	ICGC	CSMD2	PCDH15	protein_coding	protein_coding	coding:coding
0.0060063	0.7348656	0.2674731	SKCM-US	gender	0.02405247	ICGC	MUC16	PCDH18	protein_coding	protein_coding	coding:coding
0.01194848	0.6641996	0.2642358	SKCM-US	gender	0.03347604	ICGC	CSMD2	PCDHA9	protein_coding	protein_coding	coding:coding
0.001339936	0.8818585	0.2749547	SKCM-US	gender	0.01379561	ICGC	RP1	PCDHA9	protein_coding	protein_coding	coding:coding
0.0005980667	0.958635	0.2792827	SKCM-US	gender	0.0118691	ICGC	OR51B5	PCLO	protein_coding	protein_coding	coding:coding
0.001339936	0.8818585	0.2749547	SKCM-US	gender	0.01379561	ICGC	MROH2B	PCLO	protein_coding	protein_coding	coding:coding
0.001339936	0.8818585	0.2749547	SKCM-US	gender	0.01379561	ICGC	RP1	THSD7B	protein_coding	protein_coding	coding:coding
0.001339936	0.8818585	0.2749547	SKCM-US	gender	0.01379561	ICGC	DNAH7	THSD7B	protein_coding	protein_coding	coding:coding
0.0001085036	1.120145	0.2893876	SKCM-US	gender	0.01092143	ICGC	SI	TTN	protein_coding	protein_coding	coding:coding
0.0005980667	0.958635	0.2792827	SKCM-US	gender	0.0118691	ICGC	LPA	TTN-AS1	protein_coding	none protein_coding	coding:non-coding
0.001339936	0.8818585	0.2749547	SKCM-US	gender	0.01379561	ICGC	CSMD2	ZAN	protein_coding	protein_coding	coding:coding
0.001731109	0.8625288	0.2753166	SKCM-US	gender	0.014969	ICGC	DNAH7	AC005323.2	protein_coding	none protein_coding	coding:non-coding
0.001731109	0.8625288	0.2753166	SKCM-US	gender	0.014969	ICGC	SPHKAP	ADGRV1	protein_coding	protein_coding	coding:coding
0.01492114	0.6442411	0.2646528	SKCM-US	gender	0.03795271	ICGC	THSD7B	ANK3	protein_coding	protein_coding	coding:coding
0.003700217	0.7878165	0.271413	SKCM-US	gender	0.0196256	ICGC	ZFHX4	DNAH7	protein_coding	protein_coding	coding:coding
0.007592895	0.7151239	0.2678712	SKCM-US	gender	0.02620457	ICGC	RP1	DNAH8	protein_coding	protein_coding	coding:coding
0.001731109	0.8625288	0.2753166	SKCM-US	gender	0.014969	ICGC	OR51B5	FLG-AS1	protein_coding	none protein_coding	coding:non-coding
0.0007798933	0.9395011	0.2796272	SKCM-US	gender	0.01246551	ICGC	MUC16	LPA	protein_coding	protein_coding	coding:coding
0.0001436349	1.101384	0.2896989	SKCM-US	gender	0.01092143	ICGC	DNAH11	LRP1B	protein_coding	protein_coding	coding:coding
0.007592895	0.7151239	0.2678712	SKCM-US	gender	0.02620457	ICGC	FLNC	MUC16	protein_coding	protein_coding	coding:coding
0.001731109	0.8625288	0.2753166	SKCM-US	gender	0.014969	ICGC	TTN	NPAP1	protein_coding	protein_coding	coding:coding
0.007592895	0.7151239	0.2678712	SKCM-US	gender	0.02620457	ICGC	XIRP2	PCDHA9	protein_coding	protein_coding	coding:coding
0.0007798933	0.9395011	0.2796272	SKCM-US	gender	0.01246551	ICGC	STXBP5L	PCLO	protein_coding	protein_coding	coding:coding
5.932411e-05	1.187	0.2956059	SKCM-US	gender	0.01092143	ICGC	ASXL3	PCLO	protein_coding	protein_coding	coding:coding
0.01492114	0.6442411	0.2646528	SKCM-US	gender	0.03795271	ICGC	SYNE1	PKHD1L1	protein_coding	protein_coding	coding:coding
0.003700217	0.7878165	0.271413	SKCM-US	gender	0.0196256	ICGC	LRP2	PKHD1L1	protein_coding	protein_coding	coding:coding
0.007592895	0.7151239	0.2678712	SKCM-US	gender	0.02620457	ICGC	PCLO	PTPRT	protein_coding	protein_coding	coding:coding
0.0003396325	1.019011	0.2843994	SKCM-US	gender	0.01111244	ICGC	CSMD1	RYR1	protein_coding	protein_coding	coding:coding
0.003700217	0.7878165	0.271413	SKCM-US	gender	0.0196256	ICGC	CUBN	TTN-AS1	protein_coding	none protein_coding	coding:non-coding
0.01492114	0.6442411	0.2646528	SKCM-US	gender	0.03795271	ICGC	FLNC	TTN-AS1	protein_coding	none protein_coding	coding:non-coding
0.007592895	0.7151239	0.2678712	SKCM-US	gender	0.02620457	ICGC	ADGRB3	TTN-AS1	protein_coding	none protein_coding	coding:non-coding
0.007592895	0.7151239	0.2678712	SKCM-US	gender	0.02620457	ICGC	ACAN	TTN-AS1	protein_coding	none protein_coding	coding:non-coding
0.007592895	0.7151239	0.2678712	SKCM-US	gender	0.02620457	ICGC	ADAMTS18	TTN-AS1	protein_coding	none protein_coding	coding:non-coding
0.002229935	0.8429965	0.2756903	SKCM-US	gender	0.01628533	ICGC	ANK3	AC005323.2	protein_coding	none protein_coding	coding:non-coding
0.01856307	0.6240581	0.2650839	SKCM-US	gender	0.0425944	ICGC	PAPPA2	ADGRV1	protein_coding	protein_coding	coding:coding
0.01856307	0.6240581	0.2650839	SKCM-US	gender	0.0425944	ICGC	DNAH5	CMYA5	protein_coding	protein_coding	coding:coding
0.01856307	0.6240581	0.2650839	SKCM-US	gender	0.0425944	ICGC	ANK3	CNTNAP2	protein_coding	protein_coding	coding:coding
0.009565045	0.6951653	0.2682825	SKCM-US	gender	0.02989202	ICGC	LRP2	CSMD1	protein_coding	protein_coding	coding:coding
0.0004454624	0.9998774	0.2847377	SKCM-US	gender	0.01156321	ICGC	ZAN	CSMD1	protein_coding	protein_coding	coding:coding
0.01856307	0.6240581	0.2650839	SKCM-US	gender	0.0425944	ICGC	NEB	CSMD1	protein_coding	protein_coding	coding:coding
0.001014316	0.9201713	0.279983	SKCM-US	gender	0.0131964	ICGC	SPHKAP	CSMD1	protein_coding	protein_coding	coding:coding
0.01856307	0.6240581	0.2650839	SKCM-US	gender	0.0425944	ICGC	DNAH5	DNAH10	protein_coding	protein_coding	coding:coding
0.004715864	0.7680748	0.2718053	SKCM-US	gender	0.02172952	ICGC	LRP2	DNAH7	protein_coding	protein_coding	coding:coding
0.009565045	0.6951653	0.2682825	SKCM-US	gender	0.02989202	ICGC	ZFHX4	DNAH8	protein_coding	protein_coding	coding:coding
0.002229935	0.8429965	0.2756903	SKCM-US	gender	0.01628533	ICGC	SCN10A	FLG-AS1	protein_coding	none protein_coding	coding:non-coding
0.001014316	0.9201713	0.279983	SKCM-US	gender	0.0131964	ICGC	DNAH3	FLG-AS1	protein_coding	none protein_coding	coding:non-coding
0.004715864	0.7680748	0.2718053	SKCM-US	gender	0.02172952	ICGC	SYNE1	FLG-AS1	protein_coding	none protein_coding	coding:non-coding
7.882456e-05	1.168239	0.2959106	SKCM-US	gender	0.01092143	ICGC	RP1	HYDIN	protein_coding	protein_coding	coding:coding
0.01856307	0.6240581	0.2650839	SKCM-US	gender	0.0425944	ICGC	APOB	LRP1B	protein_coding	protein_coding	coding:coding
0.001014316	0.9201713	0.279983	SKCM-US	gender	0.0131964	ICGC	OR51B5	MGAM	protein_coding	protein_coding	coding:coding
0.01856307	0.6240581	0.2650839	SKCM-US	gender	0.0425944	ICGC	BSN	MUC16	protein_coding	protein_coding	coding:coding
0.004715864	0.7680748	0.2718053	SKCM-US	gender	0.02172952	ICGC	PTPRD	MUC16	protein_coding	protein_coding	coding:coding
0.001014316	0.9201713	0.279983	SKCM-US	gender	0.0131964	ICGC	ERICH3	MUC16	protein_coding	protein_coding	coding:coding
0.0004454624	0.9998774	0.2847377	SKCM-US	gender	0.01156321	ICGC	ADGRV1	MUC17	protein_coding	protein_coding	coding:coding
0.01856307	0.6240581	0.2650839	SKCM-US	gender	0.0425944	ICGC	ANK3	OBSCN	protein_coding	protein_coding	coding:coding
0.004715864	0.7680748	0.2718053	SKCM-US	gender	0.02172952	ICGC	HYDIN	PCDHGB1	protein_coding	protein_coding	coding:coding
0.0004454624	0.9998774	0.2847377	SKCM-US	gender	0.01156321	ICGC	SCN10A	PCLO	protein_coding	protein_coding	coding:coding
7.882456e-05	1.168239	0.2959106	SKCM-US	gender	0.01092143	ICGC	MMP26	PCLO	protein_coding	protein_coding	coding:coding
0.009565045	0.6951653	0.2682825	SKCM-US	gender	0.02989202	ICGC	USH2A	PKHD1L1	protein_coding	protein_coding	coding:coding
0.01856307	0.6240581	0.2650839	SKCM-US	gender	0.0425944	ICGC	MXRA5	PKHD1L1	protein_coding	protein_coding	coding:coding
0.01856307	0.6240581	0.2650839	SKCM-US	gender	0.0425944	ICGC	XIRP2	SPTA1	protein_coding	protein_coding	coding:coding
0.009565045	0.6951653	0.2682825	SKCM-US	gender	0.02989202	ICGC	TTN	TNXB	protein_coding	protein_coding	coding:coding
0.001014316	0.9201713	0.279983	SKCM-US	gender	0.0131964	ICGC	TACC2	TTN	protein_coding	protein_coding	coding:coding
0.01856307	0.6240581	0.2650839	SKCM-US	gender	0.0425944	ICGC	COL21A1	TTN-AS1	protein_coding	none protein_coding	coding:non-coding
0.001014316	0.9201713	0.279983	SKCM-US	gender	0.0131964	ICGC	MYO15A	TTN-AS1	protein_coding	none protein_coding	coding:non-coding
0.0004454624	0.9998774	0.2847377	SKCM-US	gender	0.01156321	ICGC	DNAH5	ZNF831	protein_coding	protein_coding	coding:coding
0.01200636	0.6749824	0.2687077	SKCM-US	gender	0.03347604	ICGC	LRP1B	CNTNAP2	protein_coding	protein_coding	coding:coding
0.0028639	0.8232547	0.2760765	SKCM-US	gender	0.01761617	ICGC	TTN	DMBT1	protein_coding	protein_coding	coding:coding
0.0001045423	1.149295	0.2962252	SKCM-US	gender	0.01092143	ICGC	MUC16	DNAH17	protein_coding	protein_coding	coding:coding
0.0028639	0.8232547	0.2760765	SKCM-US	gender	0.01761617	ICGC	APOB	HYDIN	protein_coding	protein_coding	coding:coding
0.0028639	0.8232547	0.2760765	SKCM-US	gender	0.01761617	ICGC	ASXL3	LRP1B	protein_coding	protein_coding	coding:coding
0.01200636	0.6749824	0.2687077	SKCM-US	gender	0.03347604	ICGC	ASXL3	MGAM	protein_coding	protein_coding	coding:coding
0.005990536	0.7481163	0.2722107	SKCM-US	gender	0.02404393	ICGC	KALRN	MUC16	protein_coding	protein_coding	coding:coding
0.02300488	0.6036428	0.2655296	SKCM-US	gender	0.04849868	ICGC	SNCAIP	MUC16	protein_coding	protein_coding	coding:coding
0.005990536	0.7481163	0.2722107	SKCM-US	gender	0.02404393	ICGC	PLCE1	MUC16	protein_coding	protein_coding	coding:coding
0.01200636	0.6749824	0.2687077	SKCM-US	gender	0.03347604	ICGC	ADGRV1	OR51B5	protein_coding	protein_coding	coding:coding
0.0002501308	1.063305	0.290352	SKCM-US	gender	0.01092143	ICGC	MUC17	PCDHA9	protein_coding	protein_coding	coding:coding
0.02300488	0.6036428	0.2655296	SKCM-US	gender	0.04849868	ICGC	DNAH3	PCDHGB1	protein_coding	protein_coding	coding:coding
0.0028639	0.8232547	0.2760765	SKCM-US	gender	0.01761617	ICGC	PCDH15	PKHD1L1	protein_coding	protein_coding	coding:coding
0.001315641	0.900639	0.2803505	SKCM-US	gender	0.01378686	ICGC	NEB	PKHD1L1	protein_coding	protein_coding	coding:coding
0.01200636	0.6749824	0.2687077	SKCM-US	gender	0.03347604	ICGC	DNAH5	RYR2	protein_coding	protein_coding	coding:coding
0.001315641	0.900639	0.2803505	SKCM-US	gender	0.01378686	ICGC	PCLO	RYR2	protein_coding	protein_coding	coding:coding
4.283527e-05	1.23897	0.3028059	SKCM-US	gender	0.01092143	ICGC	DNAH5	SI	protein_coding	protein_coding	coding:coding
0.005990536	0.7481163	0.2722107	SKCM-US	gender	0.02404393	ICGC	DNAH7	SPTA1	protein_coding	protein_coding	coding:coding
0.0005828618	0.9805477	0.2850871	SKCM-US	gender	0.0118691	ICGC	DNAH17	TTN-AS1	protein_coding	none protein_coding	coding:non-coding
0.01200636	0.6749824	0.2687077	SKCM-US	gender	0.03347604	ICGC	SALL1	TTN-AS1	protein_coding	none protein_coding	coding:non-coding
0.01200636	0.6749824	0.2687077	SKCM-US	gender	0.03347604	ICGC	PLCE1	TTN-AS1	protein_coding	none protein_coding	coding:non-coding
0.005990536	0.7481163	0.2722107	SKCM-US	gender	0.02404393	ICGC	DNAH7	ZAN	protein_coding	protein_coding	coding:coding
0.01501566	0.654567	0.2691475	SKCM-US	gender	0.03795271	ICGC	CSMD1	AC005323.2	protein_coding	none protein_coding	coding:non-coding
0.0007607599	0.9610154	0.2854481	SKCM-US	gender	0.01246551	ICGC	TTN	AHNAK2	protein_coding	protein_coding	coding:coding
0.007584145	0.7279333	0.2726298	SKCM-US	gender	0.02620457	ICGC	DNAH9	ANK3	protein_coding	protein_coding	coding:coding
0.01501566	0.654567	0.2691475	SKCM-US	gender	0.03795271	ICGC	DNAH5	CD163	protein_coding	protein_coding	coding:coding
0.0003290148	1.043976	0.2906946	SKCM-US	gender	0.01111244	ICGC	FAM135B	CSMD1	protein_coding	protein_coding	coding:coding
0.003666825	0.8032962	0.2764756	SKCM-US	gender	0.01959095	ICGC	APOB	CSMD2	protein_coding	protein_coding	coding:coding
0.0001383899	1.130161	0.29655	SKCM-US	gender	0.01092143	ICGC	ZFHX4	CSMD2	protein_coding	protein_coding	coding:coding
0.01501566	0.654567	0.2691475	SKCM-US	gender	0.03795271	ICGC	CSMD2	DNAH3	protein_coding	protein_coding	coding:coding
0.0003290148	1.043976	0.2906946	SKCM-US	gender	0.01111244	ICGC	MMP26	FLG-AS1	protein_coding	none protein_coding	coding:non-coding
0.0007607599	0.9610154	0.2854481	SKCM-US	gender	0.01246551	ICGC	MROH2B	FLG-AS1	protein_coding	none protein_coding	coding:non-coding
0.00170176	0.8808973	0.2807303	SKCM-US	gender	0.014969	ICGC	ASXL3	FLG-AS1	protein_coding	none protein_coding	coding:non-coding
0.01501566	0.654567	0.2691475	SKCM-US	gender	0.03795271	ICGC	STXBP5L	LRP1B	protein_coding	protein_coding	coding:coding
0.003666825	0.8032962	0.2764756	SKCM-US	gender	0.01959095	ICGC	NEB	MGAM	protein_coding	protein_coding	coding:coding
0.01501566	0.654567	0.2691475	SKCM-US	gender	0.03795271	ICGC	ADAM18	MUC16	protein_coding	protein_coding	coding:coding
0.007584145	0.7279333	0.2726298	SKCM-US	gender	0.02620457	ICGC	CD163L1	MUC16	protein_coding	protein_coding	coding:coding
0.01501566	0.654567	0.2691475	SKCM-US	gender	0.03795271	ICGC	XIRP2	MUC17	protein_coding	protein_coding	coding:coding
0.0007607599	0.9610154	0.2854481	SKCM-US	gender	0.01246551	ICGC	ANK3	MUC17	protein_coding	protein_coding	coding:coding
0.003666825	0.8032962	0.2764756	SKCM-US	gender	0.01959095	ICGC	ZFHX4	PKHD1L1	protein_coding	protein_coding	coding:coding
0.00170176	0.8808973	0.2807303	SKCM-US	gender	0.014969	ICGC	DNAH3	PKHD1L1	protein_coding	protein_coding	coding:coding
0.0007607599	0.9610154	0.2854481	SKCM-US	gender	0.01246551	ICGC	FAT3	PKHD1L1	protein_coding	protein_coding	coding:coding
0.0003290148	1.043976	0.2906946	SKCM-US	gender	0.01111244	ICGC	HYDIN	SPTA1	protein_coding	protein_coding	coding:coding
0.01501566	0.654567	0.2691475	SKCM-US	gender	0.03795271	ICGC	MED12L	TTN	protein_coding	protein_coding	coding:coding
0.0007607599	0.9610154	0.2854481	SKCM-US	gender	0.01246551	ICGC	CFTR	TTN-AS1	protein_coding	none protein_coding	coding:non-coding
0.01501566	0.654567	0.2691475	SKCM-US	gender	0.03795271	ICGC	ZFHX4	XIRP2	protein_coding	protein_coding	coding:coding
0.009568611	0.7075179	0.2730632	SKCM-US	gender	0.02989202	ICGC	RP1	BRAF	protein_coding	protein_coding	coding:coding
0.002194962	0.8609387	0.2811228	SKCM-US	gender	0.01628533	ICGC	ADGRV1	CACNA1E	protein_coding	protein_coding	coding:coding
0.002194962	0.8609387	0.2811228	SKCM-US	gender	0.01628533	ICGC	TTN	CMYA5	protein_coding	protein_coding	coding:coding
0.0001828429	1.110831	0.2968856	SKCM-US	gender	0.01092143	ICGC	MUC17	CSMD1	protein_coding	protein_coding	coding:coding
0.009568611	0.7075179	0.2730632	SKCM-US	gender	0.02989202	ICGC	PCDH15	CSMD1	protein_coding	protein_coding	coding:coding
0.009568611	0.7075179	0.2730632	SKCM-US	gender	0.02989202	ICGC	COL4A4	CSMD1	protein_coding	protein_coding	coding:coding
0.0009904451	0.9412737	0.2858211	SKCM-US	gender	0.0131964	ICGC	MXRA5	CSMD2	protein_coding	protein_coding	coding:coding
0.009568611	0.7075179	0.2730632	SKCM-US	gender	0.02989202	ICGC	DNAH8	FAT3	protein_coding	protein_coding	coding:coding
0.01870893	0.6339109	0.2696024	SKCM-US	gender	0.04271526	ICGC	MXRA5	FAT4	protein_coding	protein_coding	coding:coding
0.01870893	0.6339109	0.2696024	SKCM-US	gender	0.04271526	ICGC	OBSCN	FAT4	protein_coding	protein_coding	coding:coding
0.0004318136	1.024443	0.2910486	SKCM-US	gender	0.01156321	ICGC	UNC13C	FLG-AS1	protein_coding	none protein_coding	coding:non-coding
0.004680112	0.7831133	0.2768883	SKCM-US	gender	0.02164015	ICGC	ZAN	FLG-AS1	protein_coding	none protein_coding	coding:non-coding
3.084866e-05	1.295172	0.3108082	SKCM-US	gender	0.01092143	ICGC	RYR1	FLG-AS1	protein_coding	none protein_coding	coding:non-coding
0.0001828429	1.110831	0.2968856	SKCM-US	gender	0.01092143	ICGC	PCDH15	FLG-AS1	protein_coding	none protein_coding	coding:non-coding
0.009568611	0.7075179	0.2730632	SKCM-US	gender	0.02989202	ICGC	LRP1B	GRIN2A	protein_coding	protein_coding	coding:coding
0.004680112	0.7831133	0.2768883	SKCM-US	gender	0.02164015	ICGC	ZAN	MGAM	protein_coding	protein_coding	coding:coding
0.0004318136	1.024443	0.2910486	SKCM-US	gender	0.01156321	ICGC	CUBN	MUC16	protein_coding	protein_coding	coding:coding
0.009568611	0.7075179	0.2730632	SKCM-US	gender	0.02989202	ICGC	ADGRB3	MUC16	protein_coding	protein_coding	coding:coding
0.004680112	0.7831133	0.2768883	SKCM-US	gender	0.02164015	ICGC	DNAH7	OR51B5	protein_coding	protein_coding	coding:coding
0.009568611	0.7075179	0.2730632	SKCM-US	gender	0.02989202	ICGC	CSMD3	PCDHA9	protein_coding	protein_coding	coding:coding
0.0001828429	1.110831	0.2968856	SKCM-US	gender	0.01092143	ICGC	HYDIN	PCDHA9	protein_coding	protein_coding	coding:coding
0.01870893	0.6339109	0.2696024	SKCM-US	gender	0.04271526	ICGC	MUC17	PCDHGB1	protein_coding	protein_coding	coding:coding
0.004680112	0.7831133	0.2768883	SKCM-US	gender	0.02164015	ICGC	ZAN	PKHD1L1	protein_coding	protein_coding	coding:coding
0.004680112	0.7831133	0.2768883	SKCM-US	gender	0.02164015	ICGC	SPTA1	PKHD1L1	protein_coding	protein_coding	coding:coding
0.01870893	0.6339109	0.2696024	SKCM-US	gender	0.04271526	ICGC	COL4A4	PKHD1L1	protein_coding	protein_coding	coding:coding
7.567186e-05	1.200891	0.3034308	SKCM-US	gender	0.01092143	ICGC	ANK3	RYR1	protein_coding	protein_coding	coding:coding
0.002194962	0.8609387	0.2811228	SKCM-US	gender	0.01628533	ICGC	CSMD2	RYR2	protein_coding	protein_coding	coding:coding
0.01870893	0.6339109	0.2696024	SKCM-US	gender	0.04271526	ICGC	ADGRV1	SCN10A	protein_coding	protein_coding	coding:coding
3.084866e-05	1.295172	0.3108082	SKCM-US	gender	0.01092143	ICGC	DNAH5	SVEP1	protein_coding	protein_coding	coding:coding
0.0009904451	0.9412737	0.2858211	SKCM-US	gender	0.0131964	ICGC	DNAH5	TACC2	protein_coding	protein_coding	coding:coding
0.01870893	0.6339109	0.2696024	SKCM-US	gender	0.04271526	ICGC	DNAH8	THSD7B	protein_coding	protein_coding	coding:coding
0.002194962	0.8609387	0.2811228	SKCM-US	gender	0.01628533	ICGC	ANKRD30A	TTN	protein_coding	protein_coding	coding:coding
0.009568611	0.7075179	0.2730632	SKCM-US	gender	0.02989202	ICGC	PAPPA	TTN-AS1	protein_coding	none protein_coding	coding:non-coding
0.004680112	0.7831133	0.2768883	SKCM-US	gender	0.02164015	ICGC	CACNA2D3	TTN-AS1	protein_coding	none protein_coding	coding:non-coding
0.009568611	0.7075179	0.2730632	SKCM-US	gender	0.02989202	ICGC	NLRP5	TTN-AS1	protein_coding	none protein_coding	coding:non-coding
0.01870893	0.6339109	0.2696024	SKCM-US	gender	0.04271526	ICGC	ADAM18	TTN-AS1	protein_coding	none protein_coding	coding:non-coding
0.009568611	0.7075179	0.2730632	SKCM-US	gender	0.02989202	ICGC	RP1L1	TTN-AS1	protein_coding	none protein_coding	coding:non-coding
0.002194962	0.8609387	0.2811228	SKCM-US	gender	0.01628533	ICGC	KCNT2	TTN-AS1	protein_coding	none protein_coding	coding:non-coding
0.0009904451	0.9412737	0.2858211	SKCM-US	gender	0.0131964	ICGC	FREM1	TTN-AS1	protein_coding	none protein_coding	coding:non-coding
0.009568611	0.7075179	0.2730632	SKCM-US	gender	0.02989202	ICGC	DNAH9	ZFHX4	protein_coding	protein_coding	coding:coding
0.002194962	0.8609387	0.2811228	SKCM-US	gender	0.01628533	ICGC	TTN-AS1	ZIM2	none protein_coding	protein_coding	coding:non-coding
0.002822877	0.8407558	0.2815287	SKCM-US	gender	0.01761617	ICGC	PKHD1L1	AC005323.2	protein_coding	none protein_coding	coding:non-coding
0.001286133	0.9213151	0.2862066	SKCM-US	gender	0.01378686	ICGC	PCDHA9	AC005323.2	protein_coding	none protein_coding	coding:non-coding
0.002822877	0.8407558	0.2815287	SKCM-US	gender	0.01761617	ICGC	TTN	ADAMTS20	protein_coding	protein_coding	coding:coding
0.002822877	0.8407558	0.2815287	SKCM-US	gender	0.01761617	ICGC	UNC13C	ADGRV1	protein_coding	protein_coding	coding:coding
0.001286133	0.9213151	0.2862066	SKCM-US	gender	0.01378686	ICGC	FAM135B	ADGRV1	protein_coding	protein_coding	coding:coding
0.005954182	0.7626979	0.277315	SKCM-US	gender	0.02396162	ICGC	ASXL3	ADGRV1	protein_coding	protein_coding	coding:coding
0.0005654382	1.004702	0.2914144	SKCM-US	gender	0.01168747	ICGC	PCDH15	ANK3	protein_coding	protein_coding	coding:coding
0.002822877	0.8407558	0.2815287	SKCM-US	gender	0.01761617	ICGC	PCLO	CACNA1E	protein_coding	protein_coding	coding:coding
0.001286133	0.9213151	0.2862066	SKCM-US	gender	0.01378686	ICGC	TTN	COL3A1	protein_coding	protein_coding	coding:coding
0.02322128	0.6130052	0.2700732	SKCM-US	gender	0.04859115	ICGC	FAT3	CSMD1	protein_coding	protein_coding	coding:coding
0.002822877	0.8407558	0.2815287	SKCM-US	gender	0.01761617	ICGC	MROH2B	CSMD1	protein_coding	protein_coding	coding:coding
0.02322128	0.6130052	0.2700732	SKCM-US	gender	0.04859115	ICGC	DNAH3	CSMD1	protein_coding	protein_coding	coding:coding
0.02322128	0.6130052	0.2700732	SKCM-US	gender	0.04859115	ICGC	LRP2	CSMD2	protein_coding	protein_coding	coding:coding
0.002822877	0.8407558	0.2815287	SKCM-US	gender	0.01761617	ICGC	PCLO	DNAH10	protein_coding	protein_coding	coding:coding
0.0001003261	1.181561	0.3037587	SKCM-US	gender	0.01092143	ICGC	DNAH5	DNAH11	protein_coding	protein_coding	coding:coding
0.02322128	0.6130052	0.2700732	SKCM-US	gender	0.04859115	ICGC	RP1	DNAH3	protein_coding	protein_coding	coding:coding
0.005954182	0.7626979	0.277315	SKCM-US	gender	0.02396162	ICGC	THSD7B	FAT3	protein_coding	protein_coding	coding:coding
0.001286133	0.9213151	0.2862066	SKCM-US	gender	0.01378686	ICGC	FAM135B	FAT4	protein_coding	protein_coding	coding:coding
0.002822877	0.8407558	0.2815287	SKCM-US	gender	0.01761617	ICGC	USH2A	FAT4	protein_coding	protein_coding	coding:coding
0.02322128	0.6130052	0.2700732	SKCM-US	gender	0.04859115	ICGC	PCDH15	HYDIN	protein_coding	protein_coding	coding:coding
0.001286133	0.9213151	0.2862066	SKCM-US	gender	0.01378686	ICGC	OBSCN	HYDIN	protein_coding	protein_coding	coding:coding
0.005954182	0.7626979	0.277315	SKCM-US	gender	0.02396162	ICGC	SYNE1	HYDIN	protein_coding	protein_coding	coding:coding
0.0002410973	1.091299	0.2972322	SKCM-US	gender	0.01092143	ICGC	FAM135B	LRP1B	protein_coding	protein_coding	coding:coding
0.002822877	0.8407558	0.2815287	SKCM-US	gender	0.01761617	ICGC	OR51B5	LRP1B	protein_coding	protein_coding	coding:coding
0.0005654382	1.004702	0.2914144	SKCM-US	gender	0.01168747	ICGC	SVEP1	LRP1B	protein_coding	protein_coding	coding:coding
0.002822877	0.8407558	0.2815287	SKCM-US	gender	0.01761617	ICGC	UNC13C	LRP1B	protein_coding	protein_coding	coding:coding
0.005954182	0.7626979	0.277315	SKCM-US	gender	0.02396162	ICGC	DNAH5	MED12L	protein_coding	protein_coding	coding:coding
0.002822877	0.8407558	0.2815287	SKCM-US	gender	0.01761617	ICGC	SCN11A	MGAM	protein_coding	protein_coding	coding:coding
0.01202973	0.6868618	0.2735116	SKCM-US	gender	0.03347953	ICGC	SLIT2	MUC16	protein_coding	protein_coding	coding:coding
0.005954182	0.7626979	0.277315	SKCM-US	gender	0.02396162	ICGC	CACNA2D3	MUC16	protein_coding	protein_coding	coding:coding
0.02322128	0.6130052	0.2700732	SKCM-US	gender	0.04859115	ICGC	DOCK3	MUC16	protein_coding	protein_coding	coding:coding
0.001286133	0.9213151	0.2862066	SKCM-US	gender	0.01378686	ICGC	DNAH8	MUC17	protein_coding	protein_coding	coding:coding
0.02322128	0.6130052	0.2700732	SKCM-US	gender	0.04859115	ICGC	APOB	MXRA5	protein_coding	protein_coding	coding:coding
0.002822877	0.8407558	0.2815287	SKCM-US	gender	0.01761617	ICGC	DNAH7	NEB	protein_coding	protein_coding	coding:coding
0.02322128	0.6130052	0.2700732	SKCM-US	gender	0.04859115	ICGC	XIRP2	NEB	protein_coding	protein_coding	coding:coding
0.002822877	0.8407558	0.2815287	SKCM-US	gender	0.01761617	ICGC	RP1	OBSCN	protein_coding	protein_coding	coding:coding
0.01202973	0.6868618	0.2735116	SKCM-US	gender	0.03347953	ICGC	DNAH7	OBSCN	protein_coding	protein_coding	coding:coding
0.0002410973	1.091299	0.2972322	SKCM-US	gender	0.01092143	ICGC	SPHKAP	PCDHA9	protein_coding	protein_coding	coding:coding
0.001286133	0.9213151	0.2862066	SKCM-US	gender	0.01378686	ICGC	MUC17	PKHD1L1	protein_coding	protein_coding	coding:coding
0.02322128	0.6130052	0.2700732	SKCM-US	gender	0.04859115	ICGC	MXRA5	RP1	protein_coding	protein_coding	coding:coding
0.005954182	0.7626979	0.277315	SKCM-US	gender	0.02396162	ICGC	MUC16	RP1L1	protein_coding	protein_coding	coding:coding
0.0002410973	1.091299	0.2972322	SKCM-US	gender	0.01092143	ICGC	CSMD2	RYR1	protein_coding	protein_coding	coding:coding
0.002822877	0.8407558	0.2815287	SKCM-US	gender	0.01761617	ICGC	DNAH7	RYR1	protein_coding	protein_coding	coding:coding
0.01202973	0.6868618	0.2735116	SKCM-US	gender	0.03347953	ICGC	ADGRV1	RYR2	protein_coding	protein_coding	coding:coding
0.0001003261	1.181561	0.3037587	SKCM-US	gender	0.01092143	ICGC	DNAH5	TENM3	protein_coding	protein_coding	coding:coding
0.01202973	0.6868618	0.2735116	SKCM-US	gender	0.03347953	ICGC	PRUNE2	TTN	protein_coding	protein_coding	coding:coding
0.02322128	0.6130052	0.2700732	SKCM-US	gender	0.04859115	ICGC	HMCN1	TTN	protein_coding	protein_coding	coding:coding
0.005954182	0.7626979	0.277315	SKCM-US	gender	0.02396162	ICGC	COL6A3	TTN-AS1	protein_coding	none protein_coding	coding:non-coding
0.0001003261	1.181561	0.3037587	SKCM-US	gender	0.01092143	ICGC	KCNH5	TTN-AS1	protein_coding	none protein_coding	coding:non-coding
0.007550088	0.7420418	0.2777566	SKCM-US	gender	0.02620457	ICGC	TACC2	ADGRV1	protein_coding	protein_coding	coding:coding
0.007550088	0.7420418	0.2777566	SKCM-US	gender	0.02620457	ICGC	ZAN	ADGRV1	protein_coding	protein_coding	coding:coding
0.01506916	0.6659561	0.2739757	SKCM-US	gender	0.03795271	ICGC	CSMD2	ASXL3	protein_coding	protein_coding	coding:coding
0.0036196	0.8203404	0.2819484	SKCM-US	gender	0.01936797	ICGC	LRP1B	CACNA1E	protein_coding	protein_coding	coding:coding
0.007550088	0.7420418	0.2777566	SKCM-US	gender	0.02620457	ICGC	USH2A	CSMD2	protein_coding	protein_coding	coding:coding
0.001665655	0.9011322	0.2866052	SKCM-US	gender	0.014969	ICGC	DNAH7	FAM135B	protein_coding	protein_coding	coding:coding
0.0036196	0.8203404	0.2819484	SKCM-US	gender	0.01936797	ICGC	CNTNAP2	FLG-AS1	protein_coding	none protein_coding	coding:non-coding
0.0003172669	1.071557	0.2975904	SKCM-US	gender	0.01111244	ICGC	GRIN2A	FLG-AS1	protein_coding	none protein_coding	coding:non-coding
0.007550088	0.7420418	0.2777566	SKCM-US	gender	0.02620457	ICGC	USH2A	HYDIN	protein_coding	protein_coding	coding:coding
0.007550088	0.7420418	0.2777566	SKCM-US	gender	0.02620457	ICGC	LRP1B	MROH2B	protein_coding	protein_coding	coding:coding
0.0003172669	1.071557	0.2975904	SKCM-US	gender	0.01111244	ICGC	MYO15A	MUC16	protein_coding	protein_coding	coding:coding
0.007550088	0.7420418	0.2777566	SKCM-US	gender	0.02620457	ICGC	NLRP5	MUC16	protein_coding	protein_coding	coding:coding
5.455965e-05	1.256708	0.3114377	SKCM-US	gender	0.01092143	ICGC	KCNH5	MUC16	protein_coding	protein_coding	coding:coding
0.001665655	0.9011322	0.2866052	SKCM-US	gender	0.014969	ICGC	RP1	MUC17	protein_coding	protein_coding	coding:coding
0.01506916	0.6659561	0.2739757	SKCM-US	gender	0.03795271	ICGC	RP1	PCDH15	protein_coding	protein_coding	coding:coding
0.0003172669	1.071557	0.2975904	SKCM-US	gender	0.01111244	ICGC	THSD7B	PCDH15	protein_coding	protein_coding	coding:coding
0.0036196	0.8203404	0.2819484	SKCM-US	gender	0.01936797	ICGC	MXRA5	PCDHA9	protein_coding	protein_coding	coding:coding
0.007550088	0.7420418	0.2777566	SKCM-US	gender	0.02620457	ICGC	DNAH8	PCDHA9	protein_coding	protein_coding	coding:coding
0.007550088	0.7420418	0.2777566	SKCM-US	gender	0.02620457	ICGC	C6	PCLO	protein_coding	protein_coding	coding:coding
2.221324e-05	1.356262	0.3197677	SKCM-US	gender	0.01092143	ICGC	ZNF831	PCLO	protein_coding	protein_coding	coding:coding
0.0007386794	0.9847432	0.2917926	SKCM-US	gender	0.01243407	ICGC	SI	PCLO	protein_coding	protein_coding	coding:coding
0.0036196	0.8203404	0.2819484	SKCM-US	gender	0.01936797	ICGC	APOB	PKHD1L1	protein_coding	protein_coding	coding:coding
0.007550088	0.7420418	0.2777566	SKCM-US	gender	0.02620457	ICGC	TTN	RGPD4	protein_coding	protein_coding	coding:coding
0.0007386794	0.9847432	0.2917926	SKCM-US	gender	0.01243407	ICGC	CRB1	TTN	protein_coding	protein_coding	coding:coding
0.01506916	0.6659561	0.2739757	SKCM-US	gender	0.03795271	ICGC	STAB2	TTN-AS1	protein_coding	none protein_coding	coding:non-coding
0.01506916	0.6659561	0.2739757	SKCM-US	gender	0.03795271	ICGC	DOCK3	TTN-AS1	protein_coding	none protein_coding	coding:non-coding
0.007550088	0.7420418	0.2777566	SKCM-US	gender	0.02620457	ICGC	PPP1R3A	TTN-AS1	protein_coding	none protein_coding	coding:non-coding
0.01880656	0.6447917	0.2744561	SKCM-US	gender	0.04271526	ICGC	RP1	AC005323.2	protein_coding	none protein_coding	coding:non-coding
0.01880656	0.6447917	0.2744561	SKCM-US	gender	0.04271526	ICGC	THSD7B	CSMD3	protein_coding	protein_coding	coding:coding
0.00462699	0.7996843	0.2823827	SKCM-US	gender	0.02147897	ICGC	LRP1B	DNAH10	protein_coding	protein_coding	coding:coding
0.00462699	0.7996843	0.2823827	SKCM-US	gender	0.02147897	ICGC	DNAH7	DNAH10	protein_coding	protein_coding	coding:coding
0.002151278	0.8807168	0.2870176	SKCM-US	gender	0.01628533	ICGC	ANK3	DNAH3	protein_coding	protein_coding	coding:coding
0.01880656	0.6447917	0.2744561	SKCM-US	gender	0.04271526	ICGC	DNAH8	DNAH3	protein_coding	protein_coding	coding:coding
0.000416631	1.051598	0.2979607	SKCM-US	gender	0.01156321	ICGC	TTN	ERICH3	protein_coding	protein_coding	coding:coding
0.0009626788	0.9645602	0.2921836	SKCM-US	gender	0.01313014	ICGC	MXRA5	HYDIN	protein_coding	protein_coding	coding:coding
0.00462699	0.7996843	0.2823827	SKCM-US	gender	0.02147897	ICGC	ZFHX4	HYDIN	protein_coding	protein_coding	coding:coding
0.009541328	0.7211361	0.2782136	SKCM-US	gender	0.02989202	ICGC	RYR1	MGAM	protein_coding	protein_coding	coding:coding
0.00462699	0.7996843	0.2823827	SKCM-US	gender	0.02147897	ICGC	FAM135B	MGAM	protein_coding	protein_coding	coding:coding
0.00462699	0.7996843	0.2823827	SKCM-US	gender	0.02147897	ICGC	COL6A3	MUC16	protein_coding	protein_coding	coding:coding
0.0009626788	0.9645602	0.2921836	SKCM-US	gender	0.01313014	ICGC	CFTR	MUC16	protein_coding	protein_coding	coding:coding
0.009541328	0.7211361	0.2782136	SKCM-US	gender	0.02989202	ICGC	STAB2	MUC16	protein_coding	protein_coding	coding:coding
0.009541328	0.7211361	0.2782136	SKCM-US	gender	0.02989202	ICGC	CMYA5	PCLO	protein_coding	protein_coding	coding:coding
0.002151278	0.8807168	0.2870176	SKCM-US	gender	0.01628533	ICGC	CD163	PCLO	protein_coding	protein_coding	coding:coding
0.000416631	1.051598	0.2979607	SKCM-US	gender	0.01156321	ICGC	ADAMTS20	PCLO	protein_coding	protein_coding	coding:coding
7.24004e-05	1.237176	0.3117681	SKCM-US	gender	0.01092143	ICGC	SVEP1	PCLO	protein_coding	protein_coding	coding:coding
0.0001754303	1.142287	0.3044477	SKCM-US	gender	0.01092143	ICGC	LRP1B	RYR1	protein_coding	protein_coding	coding:coding
0.01880656	0.6447917	0.2744561	SKCM-US	gender	0.04271526	ICGC	DNAH7	SPHKAP	protein_coding	protein_coding	coding:coding
0.01880656	0.6447917	0.2744561	SKCM-US	gender	0.04271526	ICGC	RP1	SPHKAP	protein_coding	protein_coding	coding:coding
1.206581e-05	1.442384	0.3295826	SKCM-US	gender	0.0107732	ICGC	PCLO	TENM3	protein_coding	protein_coding	coding:coding
0.01880656	0.6447917	0.2744561	SKCM-US	gender	0.04271526	ICGC	FAM83B	TTN-AS1	protein_coding	none protein_coding	coding:non-coding
0.009541328	0.7211361	0.2782136	SKCM-US	gender	0.02989202	ICGC	FAT2	TTN-AS1	protein_coding	none protein_coding	coding:non-coding
0.002151278	0.8807168	0.2870176	SKCM-US	gender	0.01628533	ICGC	FAM135B	XIRP2	protein_coding	protein_coding	coding:coding
0.00462699	0.7996843	0.2823827	SKCM-US	gender	0.02147897	ICGC	MUC16	ZIM2	protein_coding	protein_coding	coding:coding
0.000231353	1.122329	0.3048097	SKCM-US	gender	0.01092143	ICGC	DNAH5	C6	protein_coding	protein_coding	coding:coding
0.005896169	0.7787786	0.2828322	SKCM-US	gender	0.02394604	ICGC	MUC16	CFAP54	protein_coding	protein_coding	coding:coding
0.005896169	0.7787786	0.2828322	SKCM-US	gender	0.02394604	ICGC	TTN	COL22A1	protein_coding	protein_coding	coding:coding
0.02338164	0.6233589	0.2749538	SKCM-US	gender	0.04862033	ICGC	USH2A	DNAH3	protein_coding	protein_coding	coding:coding
0.02338164	0.6233589	0.2749538	SKCM-US	gender	0.04862033	ICGC	USH2A	DNAH8	protein_coding	protein_coding	coding:coding
0.000231353	1.122329	0.3048097	SKCM-US	gender	0.01092143	ICGC	THSD7B	FAM135B	protein_coding	protein_coding	coding:coding
0.001251505	0.9441448	0.2925881	SKCM-US	gender	0.01374059	ICGC	CSMD2	FAM135B	protein_coding	protein_coding	coding:coding
0.02338164	0.6233589	0.2749538	SKCM-US	gender	0.04862033	ICGC	DNAH7	FAT3	protein_coding	protein_coding	coding:coding
0.005896169	0.7787786	0.2828322	SKCM-US	gender	0.02394604	ICGC	ANK3	FAT3	protein_coding	protein_coding	coding:coding
0.01201582	0.6999717	0.2786867	SKCM-US	gender	0.03347604	ICGC	MUC17	FAT4	protein_coding	protein_coding	coding:coding
0.001251505	0.9441448	0.2925881	SKCM-US	gender	0.01374059	ICGC	GRIN2A	FAT4	protein_coding	protein_coding	coding:coding
0.001251505	0.9441448	0.2925881	SKCM-US	gender	0.01374059	ICGC	NEB	FLG-AS1	protein_coding	none protein_coding	coding:non-coding
0.001251505	0.9441448	0.2925881	SKCM-US	gender	0.01374059	ICGC	LRP2	FLG-AS1	protein_coding	none protein_coding	coding:non-coding
0.00277069	0.8600607	0.2874442	SKCM-US	gender	0.01761617	ICGC	CACNA1E	FLG-AS1	protein_coding	none protein_coding	coding:non-coding
0.01201582	0.6999717	0.2786867	SKCM-US	gender	0.03347604	ICGC	ADGRV1	GRIN2A	protein_coding	protein_coding	coding:coding
0.005896169	0.7787786	0.2828322	SKCM-US	gender	0.02394604	ICGC	DNAH5	MECOM	protein_coding	protein_coding	coding:coding
0.01201582	0.6999717	0.2786867	SKCM-US	gender	0.03347604	ICGC	DNAH11	MGAM	protein_coding	protein_coding	coding:coding
0.01201582	0.6999717	0.2786867	SKCM-US	gender	0.03347604	ICGC	SALL1	MUC16	protein_coding	protein_coding	coding:coding
0.02338164	0.6233589	0.2749538	SKCM-US	gender	0.04862033	ICGC	KIAA1217	MUC16	protein_coding	protein_coding	coding:coding
0.000231353	1.122329	0.3048097	SKCM-US	gender	0.01092143	ICGC	SCN9A	MUC16	protein_coding	protein_coding	coding:coding
0.005896169	0.7787786	0.2828322	SKCM-US	gender	0.02394604	ICGC	THSD7B	MUC17	protein_coding	protein_coding	coding:coding
0.0005459437	1.031415	0.2983436	SKCM-US	gender	0.01168747	ICGC	HYDIN	MUC17	protein_coding	protein_coding	coding:coding
0.0005459437	1.031415	0.2983436	SKCM-US	gender	0.01168747	ICGC	DNAH5	NPAP1	protein_coding	protein_coding	coding:coding
0.005896169	0.7787786	0.2828322	SKCM-US	gender	0.02394604	ICGC	THSD7B	OBSCN	protein_coding	protein_coding	coding:coding
0.001251505	0.9441448	0.2925881	SKCM-US	gender	0.01374059	ICGC	MXRA5	OBSCN	protein_coding	protein_coding	coding:coding
0.02338164	0.6233589	0.2749538	SKCM-US	gender	0.04862033	ICGC	XIRP2	OR51B5	protein_coding	protein_coding	coding:coding
0.000231353	1.122329	0.3048097	SKCM-US	gender	0.01092143	ICGC	SCN11A	PKHD1L1	protein_coding	protein_coding	coding:coding
9.593026e-05	1.217434	0.3121097	SKCM-US	gender	0.01092143	ICGC	RYR1	PKHD1L1	protein_coding	protein_coding	coding:coding
0.005896169	0.7787786	0.2828322	SKCM-US	gender	0.02394604	ICGC	LRP1B	PTPRT	protein_coding	protein_coding	coding:coding
0.01201582	0.6999717	0.2786867	SKCM-US	gender	0.03347604	ICGC	DNAH8	SPTA1	protein_coding	protein_coding	coding:coding
0.0005459437	1.031415	0.2983436	SKCM-US	gender	0.01168747	ICGC	CSMD2	SVEP1	protein_coding	protein_coding	coding:coding
0.0005459437	1.031415	0.2983436	SKCM-US	gender	0.01168747	ICGC	LRP1B	TENM3	protein_coding	protein_coding	coding:coding
3.927063e-05	1.3174	0.3204005	SKCM-US	gender	0.01092143	ICGC	ADGRV1	TENM3	protein_coding	protein_coding	coding:coding
0.00277069	0.8600607	0.2874442	SKCM-US	gender	0.01761617	ICGC	MYO18B	TTN	protein_coding	protein_coding	coding:coding
0.02338164	0.6233589	0.2749538	SKCM-US	gender	0.04862033	ICGC	COL5A1	TTN	protein_coding	protein_coding	coding:coding
0.02338164	0.6233589	0.2749538	SKCM-US	gender	0.04862033	ICGC	PXDNL	TTN-AS1	protein_coding	none protein_coding	coding:non-coding
0.005896169	0.7787786	0.2828322	SKCM-US	gender	0.02394604	ICGC	SLIT2	TTN-AS1	protein_coding	none protein_coding	coding:non-coding
0.02338164	0.6233589	0.2749538	SKCM-US	gender	0.04862033	ICGC	KALRN	TTN-AS1	protein_coding	none protein_coding	coding:non-coding
0.005896169	0.7787786	0.2828322	SKCM-US	gender	0.02394604	ICGC	PLXNA4	TTN-AS1	protein_coding	none protein_coding	coding:non-coding
0.01201582	0.6999717	0.2786867	SKCM-US	gender	0.03347604	ICGC	TRHDE	TTN-AS1	protein_coding	none protein_coding	coding:non-coding
0.02338164	0.6233589	0.2749538	SKCM-US	gender	0.04862033	ICGC	CFAP54	TTN-AS1	protein_coding	none protein_coding	coding:non-coding
0.01201582	0.6999717	0.2786867	SKCM-US	gender	0.03347604	ICGC	BCLAF1	TTN-AS1	protein_coding	none protein_coding	coding:non-coding
0.02338164	0.6233589	0.2749538	SKCM-US	gender	0.04862033	ICGC	MUC16	ZNF536	protein_coding	protein_coding	coding:coding
0.005896169	0.7787786	0.2828322	SKCM-US	gender	0.02394604	ICGC	TTN	ZNF804A	protein_coding	protein_coding	coding:coding
0.0007138172	1.011	0.2987398	SKCM-US	gender	0.01243407	ICGC	STXBP5L	ADGRV1	protein_coding	protein_coding	coding:coding
0.003558157	0.839155	0.2878858	SKCM-US	gender	0.01907778	ICGC	DNAH5	AHNAK2	protein_coding	protein_coding	coding:coding
0.01507807	0.6785388	0.2791768	SKCM-US	gender	0.03795271	ICGC	ADGRV1	AHNAK2	protein_coding	protein_coding	coding:coding
0.001622852	0.9234887	0.2930066	SKCM-US	gender	0.01469313	ICGC	ZFHX4	ANK3	protein_coding	protein_coding	coding:coding
0.01507807	0.6785388	0.2791768	SKCM-US	gender	0.03795271	ICGC	LRP2	ANK3	protein_coding	protein_coding	coding:coding
0.003558157	0.839155	0.2878858	SKCM-US	gender	0.01907778	ICGC	MXRA5	ANK3	protein_coding	protein_coding	coding:coding
0.007489228	0.7576142	0.2832976	SKCM-US	gender	0.02620457	ICGC	TTN	CD163L1	protein_coding	protein_coding	coding:coding
0.003558157	0.839155	0.2878858	SKCM-US	gender	0.01907778	ICGC	DNAH5	COL5A1	protein_coding	protein_coding	coding:coding
0.007489228	0.7576142	0.2832976	SKCM-US	gender	0.02620457	ICGC	DNAH7	DMBT1	protein_coding	protein_coding	coding:coding
0.001622852	0.9234887	0.2930066	SKCM-US	gender	0.01469313	ICGC	PCLO	DMBT1	protein_coding	protein_coding	coding:coding
0.003558157	0.839155	0.2878858	SKCM-US	gender	0.01907778	ICGC	DNAH11	FLG-AS1	protein_coding	none protein_coding	coding:non-coding
0.0007138172	1.011	0.2987398	SKCM-US	gender	0.01243407	ICGC	PCDHA2	FLG-AS1	protein_coding	none protein_coding	coding:non-coding
0.003558157	0.839155	0.2878858	SKCM-US	gender	0.01907778	ICGC	CSMD1	GRIN2A	protein_coding	protein_coding	coding:coding
0.001622852	0.9234887	0.2930066	SKCM-US	gender	0.01469313	ICGC	CSMD2	GRIN2A	protein_coding	protein_coding	coding:coding
0.01507807	0.6785388	0.2791768	SKCM-US	gender	0.03795271	ICGC	TTN	KCNB2	protein_coding	protein_coding	coding:coding
0.001622852	0.9234887	0.2930066	SKCM-US	gender	0.01469313	ICGC	MMP26	LRP1B	protein_coding	protein_coding	coding:coding
5.211874e-05	1.297658	0.3207328	SKCM-US	gender	0.01092143	ICGC	ZNF831	MGAM	protein_coding	protein_coding	coding:coding
0.003558157	0.839155	0.2878858	SKCM-US	gender	0.01907778	ICGC	TENM3	MGAM	protein_coding	protein_coding	coding:coding
0.007489228	0.7576142	0.2832976	SKCM-US	gender	0.02620457	ICGC	ADGRV1	MMP26	protein_coding	protein_coding	coding:coding
0.007489228	0.7576142	0.2832976	SKCM-US	gender	0.02620457	ICGC	ASTN1	MUC16	protein_coding	protein_coding	coding:coding
0.007489228	0.7576142	0.2832976	SKCM-US	gender	0.02620457	ICGC	BCLAF1	MUC16	protein_coding	protein_coding	coding:coding
0.01507807	0.6785388	0.2791768	SKCM-US	gender	0.03795271	ICGC	LRP1	MUC16	protein_coding	protein_coding	coding:coding
0.01507807	0.6785388	0.2791768	SKCM-US	gender	0.03795271	ICGC	BRAF	MUC17	protein_coding	protein_coding	coding:coding
0.003558157	0.839155	0.2878858	SKCM-US	gender	0.01907778	ICGC	MUC16	PAPPA	protein_coding	protein_coding	coding:coding
0.001622852	0.9234887	0.2930066	SKCM-US	gender	0.01469313	ICGC	PCLO	PCDHA2	protein_coding	protein_coding	coding:coding
0.001622852	0.9234887	0.2930066	SKCM-US	gender	0.01469313	ICGC	DNAH3	PCDHA9	protein_coding	protein_coding	coding:coding
0.007489228	0.7576142	0.2832976	SKCM-US	gender	0.02620457	ICGC	SPTA1	PCDHA9	protein_coding	protein_coding	coding:coding
0.001622852	0.9234887	0.2930066	SKCM-US	gender	0.01469313	ICGC	APOB	PCDHA9	protein_coding	protein_coding	coding:coding
0.01507807	0.6785388	0.2791768	SKCM-US	gender	0.03795271	ICGC	TACC2	PCLO	protein_coding	protein_coding	coding:coding
0.001622852	0.9234887	0.2930066	SKCM-US	gender	0.01469313	ICGC	NPAP1	PCLO	protein_coding	protein_coding	coding:coding
5.211874e-05	1.297658	0.3207328	SKCM-US	gender	0.01092143	ICGC	FAM135B	PKHD1L1	protein_coding	protein_coding	coding:coding
0.0007138172	1.011	0.2987398	SKCM-US	gender	0.01243407	ICGC	PCDHA2	PKHD1L1	protein_coding	protein_coding	coding:coding
0.001622852	0.9234887	0.2930066	SKCM-US	gender	0.01469313	ICGC	DNAH11	PKHD1L1	protein_coding	protein_coding	coding:coding
0.007489228	0.7576142	0.2832976	SKCM-US	gender	0.02620457	ICGC	COL4A4	RP1	protein_coding	protein_coding	coding:coding
0.01507807	0.6785388	0.2791768	SKCM-US	gender	0.03795271	ICGC	BRAF	RYR1	protein_coding	protein_coding	coding:coding
0.001622852	0.9234887	0.2930066	SKCM-US	gender	0.01469313	ICGC	RP1	RYR1	protein_coding	protein_coding	coding:coding
0.001622852	0.9234887	0.2930066	SKCM-US	gender	0.01469313	ICGC	LRP1B	SCN10A	protein_coding	protein_coding	coding:coding
0.007489228	0.7576142	0.2832976	SKCM-US	gender	0.02620457	ICGC	ADGRV1	SCN11A	protein_coding	protein_coding	coding:coding
0.007489228	0.7576142	0.2832976	SKCM-US	gender	0.02620457	ICGC	DNAH7	SCN11A	protein_coding	protein_coding	coding:coding
0.0007138172	1.011	0.2987398	SKCM-US	gender	0.01243407	ICGC	ANK3	SPHKAP	protein_coding	protein_coding	coding:coding
0.0003045318	1.102146	0.305184	SKCM-US	gender	0.01111244	ICGC	THSD7B	SPHKAP	protein_coding	protein_coding	coding:coding
0.003558157	0.839155	0.2878858	SKCM-US	gender	0.01907778	ICGC	CSMD2	TACC2	protein_coding	protein_coding	coding:coding
0.003558157	0.839155	0.2878858	SKCM-US	gender	0.01907778	ICGC	ZFHX4	THSD7B	protein_coding	protein_coding	coding:coding
0.001622852	0.9234887	0.2930066	SKCM-US	gender	0.01469313	ICGC	PCDHB7	TTN	protein_coding	protein_coding	coding:coding
0.007489228	0.7576142	0.2832976	SKCM-US	gender	0.02620457	ICGC	FLNC	TTN	protein_coding	protein_coding	coding:coding
0.0007138172	1.011	0.2987398	SKCM-US	gender	0.01243407	ICGC	FREM2	TTN-AS1	protein_coding	none protein_coding	coding:non-coding
0.01885138	0.6568274	0.2796847	SKCM-US	gender	0.04271526	ICGC	FAT3	AC005323.2	protein_coding	none protein_coding	coding:non-coding
0.0009311957	0.9903439	0.2991497	SKCM-US	gender	0.01310501	ICGC	ZNF831	ANK3	protein_coding	protein_coding	coding:coding
0.004555877	0.8179906	0.2883431	SKCM-US	gender	0.02138458	ICGC	DNAH8	ASXL3	protein_coding	protein_coding	coding:coding
0.009481143	0.7361814	0.2837798	SKCM-US	gender	0.02981237	ICGC	UNC13C	CSMD1	protein_coding	protein_coding	coding:coding
0.0001676276	1.177293	0.312828	SKCM-US	gender	0.01092143	ICGC	ZNF831	CSMD1	protein_coding	protein_coding	coding:coding
0.009481143	0.7361814	0.2837798	SKCM-US	gender	0.02981237	ICGC	OR51B5	CSMD1	protein_coding	protein_coding	coding:coding
0.004555877	0.8179906	0.2883431	SKCM-US	gender	0.02138458	ICGC	APOB	DNAH3	protein_coding	protein_coding	coding:coding
0.01885138	0.6568274	0.2796847	SKCM-US	gender	0.04271526	ICGC	ZFHX4	DNAH3	protein_coding	protein_coding	coding:coding
0.002098885	0.902583	0.2934398	SKCM-US	gender	0.01628533	ICGC	DNAH11	DNAH7	protein_coding	protein_coding	coding:coding
0.004555877	0.8179906	0.2883431	SKCM-US	gender	0.02138458	ICGC	NEB	FAT4	protein_coding	protein_coding	coding:coding
0.0001676276	1.177293	0.312828	SKCM-US	gender	0.01092143	ICGC	SVEP1	FAT4	protein_coding	protein_coding	coding:coding
0.002098885	0.902583	0.2934398	SKCM-US	gender	0.01628533	ICGC	PTPRT	FLG-AS1	protein_coding	none protein_coding	coding:non-coding
0.0009311957	0.9903439	0.2991497	SKCM-US	gender	0.01310501	ICGC	SI	FLG-AS1	protein_coding	none protein_coding	coding:non-coding
0.0009311957	0.9903439	0.2991497	SKCM-US	gender	0.01310501	ICGC	SCN11A	FLG-AS1	protein_coding	none protein_coding	coding:non-coding
0.0009311957	0.9903439	0.2991497	SKCM-US	gender	0.01310501	ICGC	DNAH7	GRIN2A	protein_coding	protein_coding	coding:coding
0.009481143	0.7361814	0.2837798	SKCM-US	gender	0.02981237	ICGC	DNAH9	HYDIN	protein_coding	protein_coding	coding:coding
0.009481143	0.7361814	0.2837798	SKCM-US	gender	0.02981237	ICGC	DNAH7	MROH2B	protein_coding	protein_coding	coding:coding
0.009481143	0.7361814	0.2837798	SKCM-US	gender	0.02981237	ICGC	PDZD2	MUC16	protein_coding	protein_coding	coding:coding
0.009481143	0.7361814	0.2837798	SKCM-US	gender	0.02981237	ICGC	ERBB4	MUC16	protein_coding	protein_coding	coding:coding
0.0001676276	1.177293	0.312828	SKCM-US	gender	0.01092143	ICGC	FREM1	MUC16	protein_coding	protein_coding	coding:coding
0.002098885	0.902583	0.2934398	SKCM-US	gender	0.01628533	ICGC	KCNT2	MUC16	protein_coding	protein_coding	coding:coding
0.004555877	0.8179906	0.2883431	SKCM-US	gender	0.02138458	ICGC	ANK2	MUC16	protein_coding	protein_coding	coding:coding
0.01885138	0.6568274	0.2796847	SKCM-US	gender	0.04271526	ICGC	RP1	NEB	protein_coding	protein_coding	coding:coding
0.01885138	0.6568274	0.2796847	SKCM-US	gender	0.04271526	ICGC	LRP2	OBSCN	protein_coding	protein_coding	coding:coding
0.0009311957	0.9903439	0.2991497	SKCM-US	gender	0.01310501	ICGC	GRIN2A	PKHD1L1	protein_coding	protein_coding	coding:coding
0.01885138	0.6568274	0.2796847	SKCM-US	gender	0.04271526	ICGC	ZFHX4	RP1	protein_coding	protein_coding	coding:coding
0.004555877	0.8179906	0.2883431	SKCM-US	gender	0.02138458	ICGC	APOB	SPTA1	protein_coding	protein_coding	coding:coding
0.0009311957	0.9903439	0.2991497	SKCM-US	gender	0.01310501	ICGC	CNTN5	TTN	protein_coding	protein_coding	coding:coding
0.0009311957	0.9903439	0.2991497	SKCM-US	gender	0.01310501	ICGC	ADAMTS18	TTN	protein_coding	protein_coding	coding:coding
0.01885138	0.6568274	0.2796847	SKCM-US	gender	0.04271526	ICGC	LRP1	TTN-AS1	protein_coding	none protein_coding	coding:non-coding
0.01885138	0.6568274	0.2796847	SKCM-US	gender	0.04271526	ICGC	ASTN1	TTN-AS1	protein_coding	none protein_coding	coding:non-coding
0.002098885	0.902583	0.2934398	SKCM-US	gender	0.01628533	ICGC	COL12A1	TTN-AS1	protein_coding	none protein_coding	coding:non-coding
0.002098885	0.902583	0.2934398	SKCM-US	gender	0.01628533	ICGC	DSC3	TTN-AS1	protein_coding	none protein_coding	coding:non-coding
0.002098885	0.902583	0.2934398	SKCM-US	gender	0.01628533	ICGC	MYOCD	TTN-AS1	protein_coding	none protein_coding	coding:non-coding
0.01885138	0.6568274	0.2796847	SKCM-US	gender	0.04271526	ICGC	CACNA1C	TTN-AS1	protein_coding	none protein_coding	coding:non-coding
0.01885138	0.6568274	0.2796847	SKCM-US	gender	0.04271526	ICGC	LRP2	XIRP2	protein_coding	protein_coding	coding:coding
0.01885138	0.6568274	0.2796847	SKCM-US	gender	0.04271526	ICGC	ASXL3	XIRP2	protein_coding	protein_coding	coding:coding
0.01196189	0.71447	0.2842794	SKCM-US	gender	0.03347604	ICGC	DNAH3	AC005323.2	protein_coding	none protein_coding	coding:non-coding
0.01196189	0.71447	0.2842794	SKCM-US	gender	0.03347604	ICGC	MUC17	AC005323.2	protein_coding	none protein_coding	coding:non-coding
0.01196189	0.71447	0.2842794	SKCM-US	gender	0.03347604	ICGC	ZFHX4	BRAF	protein_coding	protein_coding	coding:coding
0.001211937	0.9694382	0.299574	SKCM-US	gender	0.01374059	ICGC	DNAH5	COL3A1	protein_coding	protein_coding	coding:coding
9.1446e-05	1.257517	0.3214318	SKCM-US	gender	0.01092143	ICGC	DNAH5	CRB1	protein_coding	protein_coding	coding:coding
0.005815554	0.7965577	0.2888168	SKCM-US	gender	0.02394604	ICGC	FAM135B	CSMD3	protein_coding	protein_coding	coding:coding
0.01196189	0.71447	0.2842794	SKCM-US	gender	0.03347604	ICGC	APOB	CSMD3	protein_coding	protein_coding	coding:coding
0.005815554	0.7965577	0.2888168	SKCM-US	gender	0.02394604	ICGC	CSMD2	DNAH10	protein_coding	protein_coding	coding:coding
0.01196189	0.71447	0.2842794	SKCM-US	gender	0.03347604	ICGC	COL4A4	DNAH8	protein_coding	protein_coding	coding:coding
0.01196189	0.71447	0.2842794	SKCM-US	gender	0.03347604	ICGC	MUC16	DPYD	protein_coding	protein_coding	coding:coding
0.005815554	0.7965577	0.2888168	SKCM-US	gender	0.02394604	ICGC	TTN	DSG1-AS1	protein_coding	none protein_coding	coding:non-coding
0.005815554	0.7965577	0.2888168	SKCM-US	gender	0.02394604	ICGC	DNAH11	FAT4	protein_coding	protein_coding	coding:coding
0.0005245808	1.061074	0.305972	SKCM-US	gender	0.01168747	ICGC	FAT3	FAT4	protein_coding	protein_coding	coding:coding
0.02348019	0.6348268	0.2802112	SKCM-US	gender	0.04862033	ICGC	RYR2	FLG-AS1	protein_coding	none protein_coding	coding:non-coding
0.01196189	0.71447	0.2842794	SKCM-US	gender	0.03347604	ICGC	PAPPA2	FLG-AS1	protein_coding	none protein_coding	coding:non-coding
0.001211937	0.9694382	0.299574	SKCM-US	gender	0.01374059	ICGC	DNAH10	FLG-AS1	protein_coding	none protein_coding	coding:non-coding
0.01196189	0.71447	0.2842794	SKCM-US	gender	0.03347604	ICGC	THSD7B	GRIN2A	protein_coding	protein_coding	coding:coding
0.005815554	0.7965577	0.2888168	SKCM-US	gender	0.02394604	ICGC	ASXL3	HYDIN	protein_coding	protein_coding	coding:coding
0.0002210448	1.156877	0.3132058	SKCM-US	gender	0.01092143	ICGC	TTN	LPA	protein_coding	protein_coding	coding:coding
2.878469e-06	1.728755	0.3694468	SKCM-US	gender	0.0107732	ICGC	ZNF831	LRP1B	protein_coding	protein_coding	coding:coding
0.01196189	0.71447	0.2842794	SKCM-US	gender	0.03347604	ICGC	RYR2	MGAM	protein_coding	protein_coding	coding:coding
0.002707246	0.8814186	0.2938884	SKCM-US	gender	0.01761617	ICGC	CACNA1E	MGAM	protein_coding	protein_coding	coding:coding
0.01196189	0.71447	0.2842794	SKCM-US	gender	0.03347604	ICGC	CSMD2	MROH2B	protein_coding	protein_coding	coding:coding
0.001211937	0.9694382	0.299574	SKCM-US	gender	0.01374059	ICGC	MYOCD	MUC16	protein_coding	protein_coding	coding:coding
0.001211937	0.9694382	0.299574	SKCM-US	gender	0.01374059	ICGC	DSC3	MUC16	protein_coding	protein_coding	coding:coding
0.005815554	0.7965577	0.2888168	SKCM-US	gender	0.02394604	ICGC	FAT2	MUC16	protein_coding	protein_coding	coding:coding
9.1446e-05	1.257517	0.3214318	SKCM-US	gender	0.01092143	ICGC	TRIM5	MUC16	protein_coding	protein_coding	coding:coding
0.01196189	0.71447	0.2842794	SKCM-US	gender	0.03347604	ICGC	MDN1	MUC16	protein_coding	protein_coding	coding:coding
0.005815554	0.7965577	0.2888168	SKCM-US	gender	0.02394604	ICGC	COL12A1	MUC16	protein_coding	protein_coding	coding:coding
0.01196189	0.71447	0.2842794	SKCM-US	gender	0.03347604	ICGC	TRHDE	MUC16	protein_coding	protein_coding	coding:coding
0.01196189	0.71447	0.2842794	SKCM-US	gender	0.03347604	ICGC	OTOGL	MUC16	protein_coding	protein_coding	coding:coding
0.01196189	0.71447	0.2842794	SKCM-US	gender	0.03347604	ICGC	PPP1R3A	MUC16	protein_coding	protein_coding	coding:coding
0.005815554	0.7965577	0.2888168	SKCM-US	gender	0.02394604	ICGC	APOB	MUC17	protein_coding	protein_coding	coding:coding
0.0002210448	1.156877	0.3132058	SKCM-US	gender	0.01092143	ICGC	CSMD2	NEB	protein_coding	protein_coding	coding:coding
0.02348019	0.6348268	0.2802112	SKCM-US	gender	0.04862033	ICGC	DNAH5	NEXMIF	protein_coding	protein_coding	coding:coding
0.02348019	0.6348268	0.2802112	SKCM-US	gender	0.04862033	ICGC	PCDH15	OBSCN	protein_coding	protein_coding	coding:coding
0.001211937	0.9694382	0.299574	SKCM-US	gender	0.01374059	ICGC	ADGRV1	PCDHA2	protein_coding	protein_coding	coding:coding
0.002707246	0.8814186	0.2938884	SKCM-US	gender	0.01761617	ICGC	FAM135B	PCDHA9	protein_coding	protein_coding	coding:coding
0.005815554	0.7965577	0.2888168	SKCM-US	gender	0.02394604	ICGC	COL4A4	PCDHA9	protein_coding	protein_coding	coding:coding
0.001211937	0.9694382	0.299574	SKCM-US	gender	0.01374059	ICGC	UNC79	PCLO	protein_coding	protein_coding	coding:coding
0.005815554	0.7965577	0.2888168	SKCM-US	gender	0.02394604	ICGC	UNC13C	PKHD1L1	protein_coding	protein_coding	coding:coding
0.02348019	0.6348268	0.2802112	SKCM-US	gender	0.04862033	ICGC	RYR2	PKHD1L1	protein_coding	protein_coding	coding:coding
0.02348019	0.6348268	0.2802112	SKCM-US	gender	0.04862033	ICGC	DNAH7	PTPRT	protein_coding	protein_coding	coding:coding
0.02348019	0.6348268	0.2802112	SKCM-US	gender	0.04862033	ICGC	CSMD1	RYR2	protein_coding	protein_coding	coding:coding
0.01196189	0.71447	0.2842794	SKCM-US	gender	0.03347604	ICGC	MUC16	SLIT3	protein_coding	protein_coding	coding:coding
0.02348019	0.6348268	0.2802112	SKCM-US	gender	0.04862033	ICGC	OBSCN	SPTA1	protein_coding	protein_coding	coding:coding
0.005815554	0.7965577	0.2888168	SKCM-US	gender	0.02394604	ICGC	MXRA5	THSD7B	protein_coding	protein_coding	coding:coding
0.01196189	0.71447	0.2842794	SKCM-US	gender	0.03347604	ICGC	DOCK3	TTN	protein_coding	protein_coding	coding:coding
0.001211937	0.9694382	0.299574	SKCM-US	gender	0.01374059	ICGC	ADGRB3	TTN	protein_coding	protein_coding	coding:coding
0.005815554	0.7965577	0.2888168	SKCM-US	gender	0.02394604	ICGC	COL14A1	TTN-AS1	protein_coding	none protein_coding	coding:non-coding
0.002707246	0.8814186	0.2938884	SKCM-US	gender	0.01761617	ICGC	FBN3	TTN-AS1	protein_coding	none protein_coding	coding:non-coding
0.02348019	0.6348268	0.2802112	SKCM-US	gender	0.04862033	ICGC	DYSF	TTN-AS1	protein_coding	none protein_coding	coding:non-coding
0.007400186	0.7748463	0.2893077	SKCM-US	gender	0.02620457	ICGC	TTN	ADAM18	protein_coding	protein_coding	coding:coding
0.01503872	0.6924693	0.2847974	SKCM-US	gender	0.03795271	ICGC	DNAH5	ADAMTS20	protein_coding	protein_coding	coding:coding
0.007400186	0.7748463	0.2893077	SKCM-US	gender	0.02620457	ICGC	PRUNE2	ADGRV1	protein_coding	protein_coding	coding:coding
0.01503872	0.6924693	0.2847974	SKCM-US	gender	0.03795271	ICGC	DNAH7	ASXL3	protein_coding	protein_coding	coding:coding
0.007400186	0.7748463	0.2893077	SKCM-US	gender	0.02620457	ICGC	CSMD2	CACNA1E	protein_coding	protein_coding	coding:coding
0.0006864079	1.040169	0.3063869	SKCM-US	gender	0.01220479	ICGC	MMP26	CSMD1	protein_coding	protein_coding	coding:coding
0.007400186	0.7748463	0.2893077	SKCM-US	gender	0.02620457	ICGC	DNAH11	CSMD2	protein_coding	protein_coding	coding:coding
0.003482254	0.8599858	0.2943532	SKCM-US	gender	0.01907778	ICGC	DNAH3	CSMD3	protein_coding	protein_coding	coding:coding
0.001573523	0.9482738	0.3000135	SKCM-US	gender	0.01467328	ICGC	SYNE1	FAT3	protein_coding	protein_coding	coding:coding
0.01503872	0.6924693	0.2847974	SKCM-US	gender	0.03795271	ICGC	MMP26	FAT4	protein_coding	protein_coding	coding:coding
2.051912e-05	1.456875	0.3420565	SKCM-US	gender	0.01092143	ICGC	ZNF831	FLG-AS1	protein_coding	none protein_coding	coding:non-coding
0.01503872	0.6924693	0.2847974	SKCM-US	gender	0.03795271	ICGC	DNAH5	FLNC	protein_coding	protein_coding	coding:coding
0.01503872	0.6924693	0.2847974	SKCM-US	gender	0.03795271	ICGC	HYDIN	GRIN2A	protein_coding	protein_coding	coding:coding
0.007400186	0.7748463	0.2893077	SKCM-US	gender	0.02620457	ICGC	TTN-AS1	GRIN2B	none protein_coding	protein_coding	coding:non-coding
0.003482254	0.8599858	0.2943532	SKCM-US	gender	0.01907778	ICGC	C6	MGAM	protein_coding	protein_coding	coding:coding
0.001573523	0.9482738	0.3000135	SKCM-US	gender	0.01467328	ICGC	NPAP1	MGAM	protein_coding	protein_coding	coding:coding
0.0006864079	1.040169	0.3063869	SKCM-US	gender	0.01220479	ICGC	DNAH7	MMP26	protein_coding	protein_coding	coding:coding
0.007400186	0.7748463	0.2893077	SKCM-US	gender	0.02620457	ICGC	THSD7B	MROH2B	protein_coding	protein_coding	coding:coding
0.01503872	0.6924693	0.2847974	SKCM-US	gender	0.03795271	ICGC	ANK3	MROH2B	protein_coding	protein_coding	coding:coding
0.007400186	0.7748463	0.2893077	SKCM-US	gender	0.02620457	ICGC	CSMD3	NEB	protein_coding	protein_coding	coding:coding
0.01503872	0.6924693	0.2847974	SKCM-US	gender	0.03795271	ICGC	THSD7B	OR51B5	protein_coding	protein_coding	coding:coding
0.007400186	0.7748463	0.2893077	SKCM-US	gender	0.02620457	ICGC	DNAH8	PCDH15	protein_coding	protein_coding	coding:coding
0.0002909904	1.136221	0.3135968	SKCM-US	gender	0.01092143	ICGC	DNAH7	PCDH15	protein_coding	protein_coding	coding:coding
0.001573523	0.9482738	0.3000135	SKCM-US	gender	0.01467328	ICGC	DNAH5	PCDH18	protein_coding	protein_coding	coding:coding
0.0001208857	1.237101	0.3217996	SKCM-US	gender	0.01092143	ICGC	CSMD2	PCDHA2	protein_coding	protein_coding	coding:coding
0.0002909904	1.136221	0.3135968	SKCM-US	gender	0.01092143	ICGC	FAT3	PCDHA9	protein_coding	protein_coding	coding:coding
0.001573523	0.9482738	0.3000135	SKCM-US	gender	0.01467328	ICGC	DNAH5	PCDHB7	protein_coding	protein_coding	coding:coding
0.01503872	0.6924693	0.2847974	SKCM-US	gender	0.03795271	ICGC	RYR1	PCDHGB1	protein_coding	protein_coding	coding:coding
0.003482254	0.8599858	0.2943532	SKCM-US	gender	0.01907778	ICGC	MROH2B	PKHD1L1	protein_coding	protein_coding	coding:coding
0.003482254	0.8599858	0.2943532	SKCM-US	gender	0.01907778	ICGC	CNTNAP2	PKHD1L1	protein_coding	protein_coding	coding:coding
0.0002909904	1.136221	0.3135968	SKCM-US	gender	0.01092143	ICGC	OR51B5	PKHD1L1	protein_coding	protein_coding	coding:coding
0.0006864079	1.040169	0.3063869	SKCM-US	gender	0.01220479	ICGC	CSMD2	PTPRT	protein_coding	protein_coding	coding:coding
0.01503872	0.6924693	0.2847974	SKCM-US	gender	0.03795271	ICGC	FAT4	RYR1	protein_coding	protein_coding	coding:coding
0.003482254	0.8599858	0.2943532	SKCM-US	gender	0.01907778	ICGC	DNAH8	RYR1	protein_coding	protein_coding	coding:coding
0.007400186	0.7748463	0.2893077	SKCM-US	gender	0.02620457	ICGC	LRP1B	RYR2	protein_coding	protein_coding	coding:coding
0.01503872	0.6924693	0.2847974	SKCM-US	gender	0.03795271	ICGC	CSMD2	RYR3	protein_coding	protein_coding	coding:coding
0.01503872	0.6924693	0.2847974	SKCM-US	gender	0.03795271	ICGC	THSD7B	SCN11A	protein_coding	protein_coding	coding:coding
0.007400186	0.7748463	0.2893077	SKCM-US	gender	0.02620457	ICGC	RP1	SCN11A	protein_coding	protein_coding	coding:coding
0.01503872	0.6924693	0.2847974	SKCM-US	gender	0.03795271	ICGC	DNAH5	SORCS3	protein_coding	protein_coding	coding:coding
0.007400186	0.7748463	0.2893077	SKCM-US	gender	0.02620457	ICGC	CSMD2	SPHKAP	protein_coding	protein_coding	coding:coding
0.0002909904	1.136221	0.3135968	SKCM-US	gender	0.01092143	ICGC	CSMD1	TENM3	protein_coding	protein_coding	coding:coding
0.01503872	0.6924693	0.2847974	SKCM-US	gender	0.03795271	ICGC	ANK3	TRANK1	protein_coding	protein_coding	coding:coding
0.003482254	0.8599858	0.2943532	SKCM-US	gender	0.01907778	ICGC	MUC16	TRRAP	protein_coding	protein_coding	coding:coding
0.003482254	0.8599858	0.2943532	SKCM-US	gender	0.01907778	ICGC	UNC79	TTN	protein_coding	protein_coding	coding:coding
0.003482254	0.8599858	0.2943532	SKCM-US	gender	0.01907778	ICGC	MYH2	TTN	protein_coding	protein_coding	coding:coding
0.01503872	0.6924693	0.2847974	SKCM-US	gender	0.03795271	ICGC	PDZD2	TTN-AS1	protein_coding	none protein_coding	coding:non-coding
0.0002909904	1.136221	0.3135968	SKCM-US	gender	0.01092143	ICGC	SCN9A	TTN-AS1	protein_coding	none protein_coding	coding:non-coding
0.01503872	0.6924693	0.2847974	SKCM-US	gender	0.03795271	ICGC	BRINP3	TTN-AS1	protein_coding	none protein_coding	coding:non-coding
0.001573523	0.9482738	0.3000135	SKCM-US	gender	0.01467328	ICGC	FCRL5	TTN-AS1	protein_coding	none protein_coding	coding:non-coding
0.01503872	0.6924693	0.2847974	SKCM-US	gender	0.03795271	ICGC	ERBB4	TTN-AS1	protein_coding	none protein_coding	coding:non-coding
0.004466315	0.8382744	0.2948349	SKCM-US	gender	0.02127429	ICGC	TTN	ACAN	protein_coding	protein_coding	coding:coding
0.002037919	0.9268409	0.3004688	SKCM-US	gender	0.01620536	ICGC	PCDHB7	ADGRV1	protein_coding	protein_coding	coding:coding
0.01883864	0.6701681	0.2853347	SKCM-US	gender	0.04271526	ICGC	USH2A	APOB	protein_coding	protein_coding	coding:coding
0.002037919	0.9268409	0.3004688	SKCM-US	gender	0.01620536	ICGC	ANK3	CACNA1E	protein_coding	protein_coding	coding:coding
0.0001595793	1.216445	0.3221801	SKCM-US	gender	0.01092143	ICGC	HYDIN	CACNA1E	protein_coding	protein_coding	coding:coding
0.002037919	0.9268409	0.3004688	SKCM-US	gender	0.01620536	ICGC	ADGRV1	CD163	protein_coding	protein_coding	coding:coding
0.009386101	0.7528457	0.2898167	SKCM-US	gender	0.02963228	ICGC	OBSCN	CNTNAP2	protein_coding	protein_coding	coding:coding
0.009386101	0.7528457	0.2898167	SKCM-US	gender	0.02963228	ICGC	TNXB	CSMD1	protein_coding	protein_coding	coding:coding
0.009386101	0.7528457	0.2898167	SKCM-US	gender	0.02963228	ICGC	TTN	DNAH2	protein_coding	protein_coding	coding:coding
0.004466315	0.8382744	0.2948349	SKCM-US	gender	0.02127429	ICGC	DNAH8	FAM135B	protein_coding	protein_coding	coding:coding
0.009386101	0.7528457	0.2898167	SKCM-US	gender	0.02963228	ICGC	TRANK1	FLG-AS1	protein_coding	none protein_coding	coding:non-coding
0.01883864	0.6701681	0.2853347	SKCM-US	gender	0.04271526	ICGC	TTN	KMT2D	protein_coding	protein_coding	coding:coding
0.004466315	0.8382744	0.2948349	SKCM-US	gender	0.02127429	ICGC	COL5A1	LRP1B	protein_coding	protein_coding	coding:coding
0.002037919	0.9268409	0.3004688	SKCM-US	gender	0.01620536	ICGC	SVEP1	MGAM	protein_coding	protein_coding	coding:coding
0.01883864	0.6701681	0.2853347	SKCM-US	gender	0.04271526	ICGC	IGSF1	MUC16	protein_coding	protein_coding	coding:coding
0.004466315	0.8382744	0.2948349	SKCM-US	gender	0.02127429	ICGC	FBN3	MUC16	protein_coding	protein_coding	coding:coding
0.002037919	0.9268409	0.3004688	SKCM-US	gender	0.01620536	ICGC	XIRP1	MUC16	protein_coding	protein_coding	coding:coding
0.002037919	0.9268409	0.3004688	SKCM-US	gender	0.01620536	ICGC	RIMS2	MUC16	protein_coding	protein_coding	coding:coding
0.004466315	0.8382744	0.2948349	SKCM-US	gender	0.02127429	ICGC	LRP1B	NPAP1	protein_coding	protein_coding	coding:coding
0.01883864	0.6701681	0.2853347	SKCM-US	gender	0.04271526	ICGC	USH2A	OBSCN	protein_coding	protein_coding	coding:coding
0.004466315	0.8382744	0.2948349	SKCM-US	gender	0.02127429	ICGC	DNAH8	OR51B5	protein_coding	protein_coding	coding:coding
0.004466315	0.8382744	0.2948349	SKCM-US	gender	0.02127429	ICGC	CSMD2	OR51B5	protein_coding	protein_coding	coding:coding
0.0008962613	1.019004	0.3068166	SKCM-US	gender	0.01310501	ICGC	APOB	PCDH15	protein_coding	protein_coding	coding:coding
0.0008962613	1.019004	0.3068166	SKCM-US	gender	0.01310501	ICGC	LRP1B	PCDHA2	protein_coding	protein_coding	coding:coding
0.01883864	0.6701681	0.2853347	SKCM-US	gender	0.04271526	ICGC	SYNE1	PCDHA9	protein_coding	protein_coding	coding:coding
0.0003823993	1.115315	0.3140016	SKCM-US	gender	0.01115924	ICGC	OBSCN	PCDHA9	protein_coding	protein_coding	coding:coding
0.009386101	0.7528457	0.2898167	SKCM-US	gender	0.02963228	ICGC	USH2A	PCDHA9	protein_coding	protein_coding	coding:coding
0.004466315	0.8382744	0.2948349	SKCM-US	gender	0.02127429	ICGC	COL5A1	PCLO	protein_coding	protein_coding	coding:coding
0.009386101	0.7528457	0.2898167	SKCM-US	gender	0.02963228	ICGC	MYH2	PCLO	protein_coding	protein_coding	coding:coding
0.004466315	0.8382744	0.2948349	SKCM-US	gender	0.02127429	ICGC	TNXB	PCLO	protein_coding	protein_coding	coding:coding
0.002037919	0.9268409	0.3004688	SKCM-US	gender	0.01620536	ICGC	ANKRD30A	PCLO	protein_coding	protein_coding	coding:coding
0.009386101	0.7528457	0.2898167	SKCM-US	gender	0.02963228	ICGC	PCLO	RELN	protein_coding	protein_coding	coding:coding
0.0003823993	1.115315	0.3140016	SKCM-US	gender	0.01115924	ICGC	FAT3	RYR1	protein_coding	protein_coding	coding:coding
0.0008962613	1.019004	0.3068166	SKCM-US	gender	0.01310501	ICGC	USH2A	RYR1	protein_coding	protein_coding	coding:coding
0.004466315	0.8382744	0.2948349	SKCM-US	gender	0.02127429	ICGC	DNAH8	SCN10A	protein_coding	protein_coding	coding:coding
0.01883864	0.6701681	0.2853347	SKCM-US	gender	0.04271526	ICGC	XIRP2	SCN11A	protein_coding	protein_coding	coding:coding
0.01883864	0.6701681	0.2853347	SKCM-US	gender	0.04271526	ICGC	ZFHX4	SPHKAP	protein_coding	protein_coding	coding:coding
0.01883864	0.6701681	0.2853347	SKCM-US	gender	0.04271526	ICGC	THSD7B	SPTA1	protein_coding	protein_coding	coding:coding
0.009386101	0.7528457	0.2898167	SKCM-US	gender	0.02963228	ICGC	APOB	THSD7B	protein_coding	protein_coding	coding:coding
0.009386101	0.7528457	0.2898167	SKCM-US	gender	0.02963228	ICGC	ADGRV1	TRANK1	protein_coding	protein_coding	coding:coding
0.0001595793	1.216445	0.3221801	SKCM-US	gender	0.01092143	ICGC	MECOM	TTN	protein_coding	protein_coding	coding:coding
0.002037919	0.9268409	0.3004688	SKCM-US	gender	0.01620536	ICGC	PTPRD	TTN	protein_coding	protein_coding	coding:coding
0.01883864	0.6701681	0.2853347	SKCM-US	gender	0.04271526	ICGC	TMC5	TTN-AS1	protein_coding	none protein_coding	coding:non-coding
0.009386101	0.7528457	0.2898167	SKCM-US	gender	0.02963228	ICGC	RP1	UNC13C	protein_coding	protein_coding	coding:coding
0.005711564	0.8162737	0.2953344	SKCM-US	gender	0.02370635	ICGC	NEB	AC005323.2	protein_coding	none protein_coding	coding:non-coding
0.002632609	0.9051295	0.3009407	SKCM-US	gender	0.01734965	ICGC	DNAH5	ADAMTS18	protein_coding	protein_coding	coding:coding
0.005711564	0.8162737	0.2953344	SKCM-US	gender	0.02370635	ICGC	LRP1B	ADAMTS20	protein_coding	protein_coding	coding:coding
0.02351085	0.6475546	0.2858923	SKCM-US	gender	0.04862033	ICGC	HMCN1	ADGRV1	protein_coding	protein_coding	coding:coding
0.02351085	0.6475546	0.2858923	SKCM-US	gender	0.04862033	ICGC	UNC13C	ANK3	protein_coding	protein_coding	coding:coding
0.001167721	0.9975714	0.3072618	SKCM-US	gender	0.01374059	ICGC	CSMD1	CACNA1E	protein_coding	protein_coding	coding:coding
0.02351085	0.6475546	0.2858923	SKCM-US	gender	0.04862033	ICGC	ASXL3	CNTNAP2	protein_coding	protein_coding	coding:coding
0.005711564	0.8162737	0.2953344	SKCM-US	gender	0.02370635	ICGC	ADGRV1	COL3A1	protein_coding	protein_coding	coding:coding
0.02351085	0.6475546	0.2858923	SKCM-US	gender	0.04862033	ICGC	CMYA5	CSMD1	protein_coding	protein_coding	coding:coding
0.0002103532	1.19554	0.3225742	SKCM-US	gender	0.01092143	ICGC	SI	CSMD1	protein_coding	protein_coding	coding:coding
0.01186521	0.7305445	0.2903447	SKCM-US	gender	0.03347604	ICGC	ANK3	DMBT1	protein_coding	protein_coding	coding:coding
0.0005016144	1.094151	0.3144209	SKCM-US	gender	0.01168747	ICGC	TTN	DNAH17	protein_coding	protein_coding	coding:coding
0.01186521	0.7305445	0.2903447	SKCM-US	gender	0.03347604	ICGC	MUC16	ERC2	protein_coding	protein_coding	coding:coding
0.002632609	0.9051295	0.3009407	SKCM-US	gender	0.01734965	ICGC	OBSCN	FAT3	protein_coding	protein_coding	coding:coding
0.02351085	0.6475546	0.2858923	SKCM-US	gender	0.04862033	ICGC	ASXL3	FAT4	protein_coding	protein_coding	coding:coding
0.001167721	0.9975714	0.3072618	SKCM-US	gender	0.01374059	ICGC	RGPD4	FLG-AS1	protein_coding	none protein_coding	coding:non-coding
0.0005016144	1.094151	0.3144209	SKCM-US	gender	0.01168747	ICGC	C6	FLG-AS1	protein_coding	none protein_coding	coding:non-coding
0.02351085	0.6475546	0.2858923	SKCM-US	gender	0.04862033	ICGC	CD163	FLG-AS1	protein_coding	none protein_coding	coding:non-coding
0.01186521	0.7305445	0.2903447	SKCM-US	gender	0.03347604	ICGC	DNAH5	HMCN1	protein_coding	protein_coding	coding:coding
0.0005016144	1.094151	0.3144209	SKCM-US	gender	0.01168747	ICGC	FAM135B	HYDIN	protein_coding	protein_coding	coding:coding
0.001167721	0.9975714	0.3072618	SKCM-US	gender	0.01374059	ICGC	TTN	KCNT2	protein_coding	protein_coding	coding:coding
0.005711564	0.8162737	0.2953344	SKCM-US	gender	0.02370635	ICGC	DNAH8	MMP26	protein_coding	protein_coding	coding:coding
0.002632609	0.9051295	0.3009407	SKCM-US	gender	0.01734965	ICGC	RP1	MROH2B	protein_coding	protein_coding	coding:coding
0.0005016144	1.094151	0.3144209	SKCM-US	gender	0.01168747	ICGC	CASR	MUC16	protein_coding	protein_coding	coding:coding
0.002632609	0.9051295	0.3009407	SKCM-US	gender	0.01734965	ICGC	DNAH3	MUC17	protein_coding	protein_coding	coding:coding
0.005711564	0.8162737	0.2953344	SKCM-US	gender	0.02370635	ICGC	DNAH9	MUC17	protein_coding	protein_coding	coding:coding
0.005711564	0.8162737	0.2953344	SKCM-US	gender	0.02370635	ICGC	USH2A	MUC17	protein_coding	protein_coding	coding:coding
0.005711564	0.8162737	0.2953344	SKCM-US	gender	0.02370635	ICGC	CSMD3	MUC17	protein_coding	protein_coding	coding:coding
0.001167721	0.9975714	0.3072618	SKCM-US	gender	0.01374059	ICGC	DNAH5	MYO18B	protein_coding	protein_coding	coding:coding
3.591891e-05	1.416277	0.3427353	SKCM-US	gender	0.01092143	ICGC	FAM135B	OBSCN	protein_coding	protein_coding	coding:coding
0.02351085	0.6475546	0.2858923	SKCM-US	gender	0.04862033	ICGC	DNAH9	PCDH15	protein_coding	protein_coding	coding:coding
0.002632609	0.9051295	0.3009407	SKCM-US	gender	0.01734965	ICGC	NEB	PCDHA9	protein_coding	protein_coding	coding:coding
0.02351085	0.6475546	0.2858923	SKCM-US	gender	0.04862033	ICGC	APOB	PCDHGB1	protein_coding	protein_coding	coding:coding
8.698353e-05	1.302567	0.3319237	SKCM-US	gender	0.01092143	ICGC	COL3A1	PCLO	protein_coding	protein_coding	coding:coding
0.001167721	0.9975714	0.3072618	SKCM-US	gender	0.01374059	ICGC	ACAN	PCLO	protein_coding	protein_coding	coding:coding
0.002632609	0.9051295	0.3009407	SKCM-US	gender	0.01734965	ICGC	ADGRB3	PCLO	protein_coding	protein_coding	coding:coding
3.591891e-05	1.416277	0.3427353	SKCM-US	gender	0.01092143	ICGC	CNTN5	PCLO	protein_coding	protein_coding	coding:coding
0.01186521	0.7305445	0.2903447	SKCM-US	gender	0.03347604	ICGC	FRAS1	PKHD1L1	protein_coding	protein_coding	coding:coding
0.0005016144	1.094151	0.3144209	SKCM-US	gender	0.01168747	ICGC	MMP26	PKHD1L1	protein_coding	protein_coding	coding:coding
0.02351085	0.6475546	0.2858923	SKCM-US	gender	0.04862033	ICGC	THSD7B	PTPRT	protein_coding	protein_coding	coding:coding
0.01186521	0.7305445	0.2903447	SKCM-US	gender	0.03347604	ICGC	CSMD3	PTPRT	protein_coding	protein_coding	coding:coding
0.002632609	0.9051295	0.3009407	SKCM-US	gender	0.01734965	ICGC	LRP2	RP1	protein_coding	protein_coding	coding:coding
0.005711564	0.8162737	0.2953344	SKCM-US	gender	0.02370635	ICGC	XIRP2	RYR1	protein_coding	protein_coding	coding:coding
0.002632609	0.9051295	0.3009407	SKCM-US	gender	0.01734965	ICGC	CSMD1	SCN10A	protein_coding	protein_coding	coding:coding
0.005711564	0.8162737	0.2953344	SKCM-US	gender	0.02370635	ICGC	CSMD2	SCN11A	protein_coding	protein_coding	coding:coding
0.02351085	0.6475546	0.2858923	SKCM-US	gender	0.04862033	ICGC	UNC13C	THSD7B	protein_coding	protein_coding	coding:coding
0.005711564	0.8162737	0.2953344	SKCM-US	gender	0.02370635	ICGC	PLCE1	TTN	protein_coding	protein_coding	coding:coding
0.0002103532	1.19554	0.3225742	SKCM-US	gender	0.01092143	ICGC	MYO15A	TTN	protein_coding	protein_coding	coding:coding
0.0002103532	1.19554	0.3225742	SKCM-US	gender	0.01092143	ICGC	TRIM5	TTN-AS1	protein_coding	none protein_coding	coding:non-coding
0.02351085	0.6475546	0.2858923	SKCM-US	gender	0.04862033	ICGC	TRRAP	TTN-AS1	protein_coding	none protein_coding	coding:non-coding
0.01186521	0.7305445	0.2903447	SKCM-US	gender	0.03347604	ICGC	ROS1	TTN-AS1	protein_coding	none protein_coding	coding:non-coding
0.01186521	0.7305445	0.2903447	SKCM-US	gender	0.03347604	ICGC	ERC2	TTN-AS1	protein_coding	none protein_coding	coding:non-coding
0.01186521	0.7305445	0.2903447	SKCM-US	gender	0.03347604	ICGC	SLIT3	TTN-AS1	protein_coding	none protein_coding	coding:non-coding
0.01186521	0.7305445	0.2903447	SKCM-US	gender	0.03347604	ICGC	MDN1	TTN-AS1	protein_coding	none protein_coding	coding:non-coding
0.01494745	0.707931	0.2908927	SKCM-US	gender	0.03795271	ICGC	DNAH5	ADAM18	protein_coding	protein_coding	coding:coding
0.007281752	0.7939725	0.2958525	SKCM-US	gender	0.02594078	ICGC	UNC79	ADGRV1	protein_coding	protein_coding	coding:coding
0.003391833	0.8831289	0.30143	SKCM-US	gender	0.01877571	ICGC	LRP1B	AHNAK2	protein_coding	protein_coding	coding:coding
0.001517973	0.97586	0.3077233	SKCM-US	gender	0.01430896	ICGC	FAM135B	ANK3	protein_coding	protein_coding	coding:coding
0.01494745	0.707931	0.2908927	SKCM-US	gender	0.03795271	ICGC	APOB	ASXL3	protein_coding	protein_coding	coding:coding
0.0006567656	1.072718	0.3148554	SKCM-US	gender	0.01204715	ICGC	RP1	CACNA1E	protein_coding	protein_coding	coding:coding
0.001517973	0.97586	0.3077233	SKCM-US	gender	0.01430896	ICGC	THSD7B	CNTNAP2	protein_coding	protein_coding	coding:coding
0.003391833	0.8831289	0.30143	SKCM-US	gender	0.01877571	ICGC	DNAH5	COL21A1	protein_coding	protein_coding	coding:coding
0.001517973	0.97586	0.3077233	SKCM-US	gender	0.01430896	ICGC	RP1	FAM135B	protein_coding	protein_coding	coding:coding
0.0006567656	1.072718	0.3148554	SKCM-US	gender	0.01204715	ICGC	OR51B5	FAT4	protein_coding	protein_coding	coding:coding
0.003391833	0.8831289	0.30143	SKCM-US	gender	0.01877571	ICGC	NPAP1	FLG-AS1	protein_coding	none protein_coding	coding:non-coding
4.746603e-05	1.395621	0.3430927	SKCM-US	gender	0.01092143	ICGC	TENM3	FLG-AS1	protein_coding	none protein_coding	coding:non-coding
0.001517973	0.97586	0.3077233	SKCM-US	gender	0.01430896	ICGC	MUC16	GRIN2B	protein_coding	protein_coding	coding:coding
0.007281752	0.7939725	0.2958525	SKCM-US	gender	0.02594078	ICGC	SPHKAP	HYDIN	protein_coding	protein_coding	coding:coding
0.01494745	0.707931	0.2908927	SKCM-US	gender	0.03795271	ICGC	MUC16	KCNH7	protein_coding	protein_coding	coding:coding
0.0006567656	1.072718	0.3148554	SKCM-US	gender	0.01204715	ICGC	DNAH5	LPA	protein_coding	protein_coding	coding:coding
0.007281752	0.7939725	0.2958525	SKCM-US	gender	0.02594078	ICGC	TNXB	LRP1B	protein_coding	protein_coding	coding:coding
0.01494745	0.707931	0.2908927	SKCM-US	gender	0.03795271	ICGC	PKD1L2	MUC16	none protein_coding	protein_coding	coding:non-coding
0.001517973	0.97586	0.3077233	SKCM-US	gender	0.01430896	ICGC	LAMA1	MUC16	protein_coding	protein_coding	coding:coding
0.01494745	0.707931	0.2908927	SKCM-US	gender	0.03795271	ICGC	PLCH1	MUC16	protein_coding	protein_coding	coding:coding
0.0002768667	1.174375	0.3229824	SKCM-US	gender	0.01092143	ICGC	FREM2	MUC16	protein_coding	protein_coding	coding:coding
0.003391833	0.8831289	0.30143	SKCM-US	gender	0.01877571	ICGC	ANO4	MUC16	protein_coding	protein_coding	coding:coding
0.01494745	0.707931	0.2908927	SKCM-US	gender	0.03795271	ICGC	CACNA1C	MUC16	protein_coding	protein_coding	coding:coding
0.003391833	0.8831289	0.30143	SKCM-US	gender	0.01877571	ICGC	FCRL5	MUC16	protein_coding	protein_coding	coding:coding
0.01494745	0.707931	0.2908927	SKCM-US	gender	0.03795271	ICGC	ZAN	MUC17	protein_coding	protein_coding	coding:coding
0.0002768667	1.174375	0.3229824	SKCM-US	gender	0.01092143	ICGC	OBSCN	MUC17	protein_coding	protein_coding	coding:coding
0.0002768667	1.174375	0.3229824	SKCM-US	gender	0.01092143	ICGC	ZFHX4	MUC17	protein_coding	protein_coding	coding:coding
0.01494745	0.707931	0.2908927	SKCM-US	gender	0.03795271	ICGC	THSD7B	NEB	protein_coding	protein_coding	coding:coding
0.01494745	0.707931	0.2908927	SKCM-US	gender	0.03795271	ICGC	ZAN	NEB	protein_coding	protein_coding	coding:coding
0.003391833	0.8831289	0.30143	SKCM-US	gender	0.01877571	ICGC	ANK3	NPAP1	protein_coding	protein_coding	coding:coding
0.01494745	0.707931	0.2908927	SKCM-US	gender	0.03795271	ICGC	ANK3	OR51B5	protein_coding	protein_coding	coding:coding
0.003391833	0.8831289	0.30143	SKCM-US	gender	0.01877571	ICGC	RP1	OR51B5	protein_coding	protein_coding	coding:coding
0.01494745	0.707931	0.2908927	SKCM-US	gender	0.03795271	ICGC	TTN	PCDH18	protein_coding	protein_coding	coding:coding
0.003391833	0.8831289	0.30143	SKCM-US	gender	0.01877571	ICGC	RP1	PCDHA2	protein_coding	protein_coding	coding:coding
0.0006567656	1.072718	0.3148554	SKCM-US	gender	0.01204715	ICGC	ZFHX4	PCDHA9	protein_coding	protein_coding	coding:coding
0.0006567656	1.072718	0.3148554	SKCM-US	gender	0.01204715	ICGC	PTPRT	PCDHA9	protein_coding	protein_coding	coding:coding
0.0006567656	1.072718	0.3148554	SKCM-US	gender	0.01204715	ICGC	PCDHB7	PCLO	protein_coding	protein_coding	coding:coding
0.007281752	0.7939725	0.2958525	SKCM-US	gender	0.02594078	ICGC	ADAMTS18	PCLO	protein_coding	protein_coding	coding:coding
0.0001148489	1.281661	0.3323062	SKCM-US	gender	0.01092143	ICGC	AHNAK2	PCLO	protein_coding	protein_coding	coding:coding
0.01494745	0.707931	0.2908927	SKCM-US	gender	0.03795271	ICGC	ABCA13	PCLO	protein_coding	protein_coding	coding:coding
0.01494745	0.707931	0.2908927	SKCM-US	gender	0.03795271	ICGC	CSDE1	PKHD1L1	protein_coding	protein_coding	coding:coding
0.001517973	0.97586	0.3077233	SKCM-US	gender	0.01430896	ICGC	TNXB	PKHD1L1	protein_coding	protein_coding	coding:coding
4.746603e-05	1.395621	0.3430927	SKCM-US	gender	0.01092143	ICGC	ZNF831	PKHD1L1	protein_coding	protein_coding	coding:coding
0.007281752	0.7939725	0.2958525	SKCM-US	gender	0.02594078	ICGC	CACNA1E	PKHD1L1	protein_coding	protein_coding	coding:coding
0.0006567656	1.072718	0.3148554	SKCM-US	gender	0.01204715	ICGC	DNAH5	PRUNE2	protein_coding	protein_coding	coding:coding
0.01494745	0.707931	0.2908927	SKCM-US	gender	0.03795271	ICGC	DNAH8	PTPRT	protein_coding	protein_coding	coding:coding
0.003391833	0.8831289	0.30143	SKCM-US	gender	0.01877571	ICGC	CSMD3	RYR1	protein_coding	protein_coding	coding:coding
0.001517973	0.97586	0.3077233	SKCM-US	gender	0.01430896	ICGC	RP1	SCN10A	protein_coding	protein_coding	coding:coding
0.003391833	0.8831289	0.30143	SKCM-US	gender	0.01877571	ICGC	USH2A	SPTA1	protein_coding	protein_coding	coding:coding
0.003391833	0.8831289	0.30143	SKCM-US	gender	0.01877571	ICGC	MXRA5	SPTA1	protein_coding	protein_coding	coding:coding
0.007281752	0.7939725	0.2958525	SKCM-US	gender	0.02594078	ICGC	CSMD2	STXBP5L	protein_coding	protein_coding	coding:coding
0.007281752	0.7939725	0.2958525	SKCM-US	gender	0.02594078	ICGC	PKHD1L1	TENM3	protein_coding	protein_coding	coding:coding
0.001517973	0.97586	0.3077233	SKCM-US	gender	0.01430896	ICGC	XIRP2	TENM3	protein_coding	protein_coding	coding:coding
0.007281752	0.7939725	0.2958525	SKCM-US	gender	0.02594078	ICGC	LRP2	THSD7B	protein_coding	protein_coding	coding:coding
0.003391833	0.8831289	0.30143	SKCM-US	gender	0.01877571	ICGC	LILRB1	TTN	protein_coding	protein_coding	coding:coding
0.01494745	0.707931	0.2908927	SKCM-US	gender	0.03795271	ICGC	TNR	TTN	protein_coding	protein_coding	coding:coding
0.007281752	0.7939725	0.2958525	SKCM-US	gender	0.02594078	ICGC	CASR	TTN-AS1	protein_coding	none protein_coding	coding:non-coding
0.001517973	0.97586	0.3077233	SKCM-US	gender	0.01430896	ICGC	CNTNAP5	TTN-AS1	protein_coding	none protein_coding	coding:non-coding
0.01494745	0.707931	0.2908927	SKCM-US	gender	0.03795271	ICGC	CNTN4	TTN-AS1	protein_coding	none protein_coding	coding:non-coding
0.01494745	0.707931	0.2908927	SKCM-US	gender	0.03795271	ICGC	SAMD9L	TTN-AS1	protein_coding	none protein_coding	coding:non-coding
0.007281752	0.7939725	0.2958525	SKCM-US	gender	0.02594078	ICGC	MUC4	TTN-AS1	protein_coding	none protein_coding	coding:non-coding
0.01494745	0.707931	0.2908927	SKCM-US	gender	0.03795271	ICGC	DNAH7	UNC13C	protein_coding	protein_coding	coding:coding
0.007281752	0.7939725	0.2958525	SKCM-US	gender	0.02594078	ICGC	CSMD2	UNC79	protein_coding	protein_coding	coding:coding
0.003391833	0.8831289	0.30143	SKCM-US	gender	0.01877571	ICGC	DNAH5	ZNF804A	protein_coding	protein_coding	coding:coding
0.0008582416	1.051007	0.3153057	SKCM-US	gender	0.01286633	ICGC	RYR1	AC005323.2	protein_coding	none protein_coding	coding:non-coding
0.01876347	0.6849926	0.2914617	SKCM-US	gender	0.04271526	ICGC	OBSCN	AC005323.2	protein_coding	none protein_coding	coding:non-coding
0.001968679	0.9538594	0.3082019	SKCM-US	gender	0.01587394	ICGC	CSMD2	ADAMTS20	protein_coding	protein_coding	coding:coding
0.001968679	0.9538594	0.3082019	SKCM-US	gender	0.01587394	ICGC	DNAH11	ADGRV1	protein_coding	protein_coding	coding:coding
0.009254398	0.771359	0.2963904	SKCM-US	gender	0.029527	ICGC	ZFHX4	ASXL3	protein_coding	protein_coding	coding:coding
0.001968679	0.9538594	0.3082019	SKCM-US	gender	0.01587394	ICGC	XIRP2	CACNA1E	protein_coding	protein_coding	coding:coding
0.00435805	0.8608277	0.3019377	SKCM-US	gender	0.02087131	ICGC	MUC16	COL14A1	protein_coding	protein_coding	coding:coding
0.01876347	0.6849926	0.2914617	SKCM-US	gender	0.04271526	ICGC	RP1	COL5A1	protein_coding	protein_coding	coding:coding
0.009254398	0.771359	0.2963904	SKCM-US	gender	0.029527	ICGC	TTN	COL6A3	protein_coding	protein_coding	coding:coding
0.01876347	0.6849926	0.2914617	SKCM-US	gender	0.04271526	ICGC	STXBP5L	CSMD1	protein_coding	protein_coding	coding:coding
0.0008582416	1.051007	0.3153057	SKCM-US	gender	0.01286633	ICGC	ADGRV1	DMBT1	protein_coding	protein_coding	coding:coding
0.00435805	0.8608277	0.3019377	SKCM-US	gender	0.02087131	ICGC	CSMD1	DNAH10	protein_coding	protein_coding	coding:coding
0.009254398	0.771359	0.2963904	SKCM-US	gender	0.029527	ICGC	DNAH5	DNAH2	protein_coding	protein_coding	coding:coding
0.009254398	0.771359	0.2963904	SKCM-US	gender	0.029527	ICGC	BRAF	FAT3	protein_coding	protein_coding	coding:coding
0.01876347	0.6849926	0.2914617	SKCM-US	gender	0.04271526	ICGC	CMYA5	FAT4	protein_coding	protein_coding	coding:coding
6.267251e-05	1.374715	0.3434628	SKCM-US	gender	0.01092143	ICGC	TTN	FREM1	protein_coding	protein_coding	coding:coding
0.01876347	0.6849926	0.2914617	SKCM-US	gender	0.04271526	ICGC	ZFHX4	GRIN2A	protein_coding	protein_coding	coding:coding
0.01876347	0.6849926	0.2914617	SKCM-US	gender	0.04271526	ICGC	DNAH3	GRIN2A	protein_coding	protein_coding	coding:coding
0.001968679	0.9538594	0.3082019	SKCM-US	gender	0.01587394	ICGC	SI	LRP1B	protein_coding	protein_coding	coding:coding
0.001968679	0.9538594	0.3082019	SKCM-US	gender	0.01587394	ICGC	PCDHB7	MGAM	protein_coding	protein_coding	coding:coding
0.001968679	0.9538594	0.3082019	SKCM-US	gender	0.01587394	ICGC	COL3A1	MGAM	protein_coding	protein_coding	coding:coding
0.01876347	0.6849926	0.2914617	SKCM-US	gender	0.04271526	ICGC	ADAMTS20	MGAM	protein_coding	protein_coding	coding:coding
0.0003638461	1.152942	0.3234053	SKCM-US	gender	0.01111244	ICGC	HYDIN	MMP26	protein_coding	protein_coding	coding:coding
0.009254398	0.771359	0.2963904	SKCM-US	gender	0.029527	ICGC	DNAH8	MROH2B	protein_coding	protein_coding	coding:coding
0.00435805	0.8608277	0.3019377	SKCM-US	gender	0.02087131	ICGC	HYDIN	MROH2B	protein_coding	protein_coding	coding:coding
0.01876347	0.6849926	0.2914617	SKCM-US	gender	0.04271526	ICGC	BRINP3	MUC16	protein_coding	protein_coding	coding:coding
0.01876347	0.6849926	0.2914617	SKCM-US	gender	0.04271526	ICGC	NDST4	MUC16	protein_coding	protein_coding	coding:coding
0.00435805	0.8608277	0.3019377	SKCM-US	gender	0.02087131	ICGC	FAM83B	MUC16	protein_coding	protein_coding	coding:coding
0.00435805	0.8608277	0.3019377	SKCM-US	gender	0.02087131	ICGC	MUC4	MUC16	protein_coding	protein_coding	coding:coding
0.00435805	0.8608277	0.3019377	SKCM-US	gender	0.02087131	ICGC	MYO5B	MUC16	protein_coding	protein_coding	coding:coding
0.009254398	0.771359	0.2963904	SKCM-US	gender	0.029527	ICGC	TENM2	MUC16	protein_coding	protein_coding	coding:coding
0.0008582416	1.051007	0.3153057	SKCM-US	gender	0.01286633	ICGC	MXRA5	MUC17	protein_coding	protein_coding	coding:coding
0.00435805	0.8608277	0.3019377	SKCM-US	gender	0.02087131	ICGC	SPTA1	MUC17	protein_coding	protein_coding	coding:coding
0.01876347	0.6849926	0.2914617	SKCM-US	gender	0.04271526	ICGC	USH2A	MXRA5	protein_coding	protein_coding	coding:coding
0.00435805	0.8608277	0.3019377	SKCM-US	gender	0.02087131	ICGC	ANK3	NEB	protein_coding	protein_coding	coding:coding
0.009254398	0.771359	0.2963904	SKCM-US	gender	0.029527	ICGC	APOB	OBSCN	protein_coding	protein_coding	coding:coding
0.009254398	0.771359	0.2963904	SKCM-US	gender	0.029527	ICGC	RP1	PAPPA2	protein_coding	protein_coding	coding:coding
0.0008582416	1.051007	0.3153057	SKCM-US	gender	0.01286633	ICGC	CSMD1	PCDHA2	protein_coding	protein_coding	coding:coding
0.00435805	0.8608277	0.3019377	SKCM-US	gender	0.02087131	ICGC	CNTNAP2	PCDHA9	protein_coding	protein_coding	coding:coding
0.0003638461	1.152942	0.3234053	SKCM-US	gender	0.01111244	ICGC	LRP2	PCDHA9	protein_coding	protein_coding	coding:coding
0.001968679	0.9538594	0.3082019	SKCM-US	gender	0.01587394	ICGC	OR51B5	PCDHA9	protein_coding	protein_coding	coding:coding
0.001968679	0.9538594	0.3082019	SKCM-US	gender	0.01587394	ICGC	MROH2B	PCDHA9	protein_coding	protein_coding	coding:coding
0.01876347	0.6849926	0.2914617	SKCM-US	gender	0.04271526	ICGC	SCN11A	PCDHGB1	protein_coding	protein_coding	coding:coding
0.00435805	0.8608277	0.3019377	SKCM-US	gender	0.02087131	ICGC	MED12L	PCLO	protein_coding	protein_coding	coding:coding
0.001968679	0.9538594	0.3082019	SKCM-US	gender	0.01587394	ICGC	TRANK1	PKHD1L1	protein_coding	protein_coding	coding:coding
0.00435805	0.8608277	0.3019377	SKCM-US	gender	0.02087131	ICGC	STXBP5L	PKHD1L1	protein_coding	protein_coding	coding:coding
0.001968679	0.9538594	0.3082019	SKCM-US	gender	0.01587394	ICGC	ASXL3	PKHD1L1	protein_coding	protein_coding	coding:coding
0.001968679	0.9538594	0.3082019	SKCM-US	gender	0.01587394	ICGC	SVEP1	PKHD1L1	protein_coding	protein_coding	coding:coding
0.00435805	0.8608277	0.3019377	SKCM-US	gender	0.02087131	ICGC	TACC2	PKHD1L1	protein_coding	protein_coding	coding:coding
0.0001514611	1.260497	0.3327024	SKCM-US	gender	0.01092143	ICGC	SI	PKHD1L1	protein_coding	protein_coding	coding:coding
0.009254398	0.771359	0.2963904	SKCM-US	gender	0.029527	ICGC	RP1	PTPRT	protein_coding	protein_coding	coding:coding
0.001968679	0.9538594	0.3082019	SKCM-US	gender	0.01587394	ICGC	SYNE1	RYR1	protein_coding	protein_coding	coding:coding
0.0003638461	1.152942	0.3234053	SKCM-US	gender	0.01111244	ICGC	NEB	RYR1	protein_coding	protein_coding	coding:coding
0.009254398	0.771359	0.2963904	SKCM-US	gender	0.029527	ICGC	ZFHX4	RYR1	protein_coding	protein_coding	coding:coding
0.009254398	0.771359	0.2963904	SKCM-US	gender	0.029527	ICGC	DNAH7	RYR2	protein_coding	protein_coding	coding:coding
0.009254398	0.771359	0.2963904	SKCM-US	gender	0.029527	ICGC	LRP2	SPTA1	protein_coding	protein_coding	coding:coding
0.0008582416	1.051007	0.3153057	SKCM-US	gender	0.01286633	ICGC	RP1	TENM3	protein_coding	protein_coding	coding:coding
0.0008582416	1.051007	0.3153057	SKCM-US	gender	0.01286633	ICGC	CSMD2	TENM3	protein_coding	protein_coding	coding:coding
0.009254398	0.771359	0.2963904	SKCM-US	gender	0.029527	ICGC	EPHA6	TTN	protein_coding	protein_coding	coding:coding
0.009254398	0.771359	0.2963904	SKCM-US	gender	0.029527	ICGC	ANO4	TTN-AS1	protein_coding	none protein_coding	coding:non-coding
0.001968679	0.9538594	0.3082019	SKCM-US	gender	0.01587394	ICGC	LAMA5	TTN-AS1	protein_coding	none protein_coding	coding:non-coding
0.01876347	0.6849926	0.2914617	SKCM-US	gender	0.04271526	ICGC	TENM2	TTN-AS1	protein_coding	none protein_coding	coding:non-coding
0.00435805	0.8608277	0.3019377	SKCM-US	gender	0.02087131	ICGC	GRIN3A	TTN-AS1	protein_coding	none protein_coding	coding:non-coding
0.009254398	0.771359	0.2963904	SKCM-US	gender	0.029527	ICGC	CR1	TTN-AS1	protein_coding	none protein_coding	coding:non-coding
0.0003638461	1.152942	0.3234053	SKCM-US	gender	0.01111244	ICGC	ZNF831	XIRP2	protein_coding	protein_coding	coding:coding
0.00435805	0.8608277	0.3019377	SKCM-US	gender	0.02087131	ICGC	ZFHX4	ZAN	protein_coding	protein_coding	coding:coding
0.009254398	0.771359	0.2963904	SKCM-US	gender	0.029527	ICGC	THSD7B	ZAN	protein_coding	protein_coding	coding:coding
0.001968679	0.9538594	0.3082019	SKCM-US	gender	0.01587394	ICGC	TTN	ZDBF2	protein_coding	protein_coding	coding:coding
0.0008582416	1.051007	0.3153057	SKCM-US	gender	0.01286633	ICGC	TTN	ZIM2	protein_coding	protein_coding	coding:coding
0.005583652	0.8382142	0.3024647	SKCM-US	gender	0.02339242	ICGC	DNAH5	ANKRD30A	protein_coding	protein_coding	coding:coding
0.005583652	0.8382142	0.3024647	SKCM-US	gender	0.02339242	ICGC	TTN	BSN	protein_coding	protein_coding	coding:coding
0.0234673	0.661716	0.2920529	SKCM-US	gender	0.04862033	ICGC	DNAH5	COL22A1	protein_coding	protein_coding	coding:coding
0.001119275	1.029006	0.3157728	SKCM-US	gender	0.01341609	ICGC	DNAH7	COL3A1	protein_coding	protein_coding	coding:coding
0.01172319	0.7484206	0.2969488	SKCM-US	gender	0.03347604	ICGC	DNAH11	CSMD3	protein_coding	protein_coding	coding:coding
0.01172319	0.7484206	0.2969488	SKCM-US	gender	0.03347604	ICGC	PCLO	DCC	protein_coding	protein_coding	coding:coding
0.005583652	0.8382142	0.3024647	SKCM-US	gender	0.02339242	ICGC	DNAH3	DNAH10	protein_coding	protein_coding	coding:coding
0.0234673	0.661716	0.2920529	SKCM-US	gender	0.04862033	ICGC	TTN	DPYD	protein_coding	protein_coding	coding:coding
0.001119275	1.029006	0.3157728	SKCM-US	gender	0.01341609	ICGC	APOB	FAM135B	protein_coding	protein_coding	coding:coding
0.001119275	1.029006	0.3157728	SKCM-US	gender	0.01341609	ICGC	MXRA5	FAT3	protein_coding	protein_coding	coding:coding
0.0001994989	1.239064	0.3331131	SKCM-US	gender	0.01092143	ICGC	STXBP5L	FLG-AS1	protein_coding	none protein_coding	coding:non-coding
0.001119275	1.029006	0.3157728	SKCM-US	gender	0.01341609	ICGC	CMYA5	FLG-AS1	protein_coding	none protein_coding	coding:non-coding
0.0234673	0.661716	0.2920529	SKCM-US	gender	0.04862033	ICGC	DCC	FLG-AS1	protein_coding	none protein_coding	coding:non-coding
0.0004773811	1.131231	0.3238438	SKCM-US	gender	0.01168747	ICGC	TNXB	FLG-AS1	protein_coding	none protein_coding	coding:non-coding
0.01172319	0.7484206	0.2969488	SKCM-US	gender	0.03347604	ICGC	APOB	GRIN2A	protein_coding	protein_coding	coding:coding
0.001119275	1.029006	0.3157728	SKCM-US	gender	0.01341609	ICGC	LRP2	HYDIN	protein_coding	protein_coding	coding:coding
0.002547041	0.9315582	0.3086985	SKCM-US	gender	0.0170768	ICGC	UNC13C	HYDIN	protein_coding	protein_coding	coding:coding
0.002547041	0.9315582	0.3086985	SKCM-US	gender	0.0170768	ICGC	ZAN	HYDIN	protein_coding	protein_coding	coding:coding
0.005583652	0.8382142	0.3024647	SKCM-US	gender	0.02339242	ICGC	UNC79	MGAM	protein_coding	protein_coding	coding:coding
0.005583652	0.8382142	0.3024647	SKCM-US	gender	0.02339242	ICGC	SCN10A	MGAM	protein_coding	protein_coding	coding:coding
0.01172319	0.7484206	0.2969488	SKCM-US	gender	0.03347604	ICGC	CMYA5	MGAM	protein_coding	protein_coding	coding:coding
0.002547041	0.9315582	0.3086985	SKCM-US	gender	0.0170768	ICGC	THSD7B	MMP26	protein_coding	protein_coding	coding:coding
0.005583652	0.8382142	0.3024647	SKCM-US	gender	0.02339242	ICGC	CSMD3	MMP26	protein_coding	protein_coding	coding:coding
0.01172319	0.7484206	0.2969488	SKCM-US	gender	0.03347604	ICGC	XIRP2	MMP26	protein_coding	protein_coding	coding:coding
0.0234673	0.661716	0.2920529	SKCM-US	gender	0.04862033	ICGC	SAMD9L	MUC16	protein_coding	protein_coding	coding:coding
0.0234673	0.661716	0.2920529	SKCM-US	gender	0.04862033	ICGC	ABCB5	MUC16	protein_coding	protein_coding	coding:coding
0.005583652	0.8382142	0.3024647	SKCM-US	gender	0.02339242	ICGC	NEBL	MUC16	protein_coding	protein_coding	coding:coding
0.01172319	0.7484206	0.2969488	SKCM-US	gender	0.03347604	ICGC	CNTNAP5	MUC16	protein_coding	protein_coding	coding:coding
0.005583652	0.8382142	0.3024647	SKCM-US	gender	0.02339242	ICGC	DYSF	MUC16	protein_coding	protein_coding	coding:coding
0.001119275	1.029006	0.3157728	SKCM-US	gender	0.01341609	ICGC	FAM135B	MUC17	protein_coding	protein_coding	coding:coding
0.002547041	0.9315582	0.3086985	SKCM-US	gender	0.0170768	ICGC	TTN	NBEA	protein_coding	protein_coding	coding:coding
0.01172319	0.7484206	0.2969488	SKCM-US	gender	0.03347604	ICGC	TACC2	NEB	protein_coding	protein_coding	coding:coding
0.005583652	0.8382142	0.3024647	SKCM-US	gender	0.02339242	ICGC	ZFHX4	NEB	protein_coding	protein_coding	coding:coding
0.0234673	0.661716	0.2920529	SKCM-US	gender	0.04862033	ICGC	TTN	NLRP5	protein_coding	protein_coding	coding:coding
0.001119275	1.029006	0.3157728	SKCM-US	gender	0.01341609	ICGC	ADGRV1	NPAP1	protein_coding	protein_coding	coding:coding
0.0234673	0.661716	0.2920529	SKCM-US	gender	0.04862033	ICGC	MUC16	OR2L13	protein_coding	protein_coding	coding:coding
0.01172319	0.7484206	0.2969488	SKCM-US	gender	0.03347604	ICGC	USH2A	OR51B5	protein_coding	protein_coding	coding:coding
0.0001994989	1.239064	0.3331131	SKCM-US	gender	0.01092143	ICGC	SPTA1	OR51B5	protein_coding	protein_coding	coding:coding
0.005583652	0.8382142	0.3024647	SKCM-US	gender	0.02339242	ICGC	DNAH5	PAPPA	protein_coding	protein_coding	coding:coding
0.01172319	0.7484206	0.2969488	SKCM-US	gender	0.03347604	ICGC	MXRA5	PCDHA2	protein_coding	protein_coding	coding:coding
0.001119275	1.029006	0.3157728	SKCM-US	gender	0.01341609	ICGC	GRIN2A	PCDHA9	protein_coding	protein_coding	coding:coding
0.0234673	0.661716	0.2920529	SKCM-US	gender	0.04862033	ICGC	MMP26	PCDHGB1	protein_coding	protein_coding	coding:coding
0.002547041	0.9315582	0.3086985	SKCM-US	gender	0.0170768	ICGC	PREX2	PCLO	protein_coding	protein_coding	coding:coding
0.002547041	0.9315582	0.3086985	SKCM-US	gender	0.0170768	ICGC	COL22A1	PCLO	protein_coding	protein_coding	coding:coding
0.002547041	0.9315582	0.3086985	SKCM-US	gender	0.0170768	ICGC	MECOM	PCLO	protein_coding	protein_coding	coding:coding
0.005583652	0.8382142	0.3024647	SKCM-US	gender	0.02339242	ICGC	PTPRD	PCLO	protein_coding	protein_coding	coding:coding
0.0001994989	1.239064	0.3331131	SKCM-US	gender	0.01092143	ICGC	ZNF804A	PCLO	protein_coding	protein_coding	coding:coding
0.0234673	0.661716	0.2920529	SKCM-US	gender	0.04862033	ICGC	DNAH5	PTPRB	protein_coding	protein_coding	coding:coding
0.01172319	0.7484206	0.2969488	SKCM-US	gender	0.03347604	ICGC	TTN	RP1L1	protein_coding	protein_coding	coding:coding
0.005583652	0.8382142	0.3024647	SKCM-US	gender	0.02339242	ICGC	DNAH3	RYR1	protein_coding	protein_coding	coding:coding
0.002547041	0.9315582	0.3086985	SKCM-US	gender	0.0170768	ICGC	CSMD2	SCN10A	protein_coding	protein_coding	coding:coding
0.001119275	1.029006	0.3157728	SKCM-US	gender	0.01341609	ICGC	ANK3	SCN11A	protein_coding	protein_coding	coding:coding
0.01172319	0.7484206	0.2969488	SKCM-US	gender	0.03347604	ICGC	DNAH5	STAB2	protein_coding	protein_coding	coding:coding
0.0001994989	1.239064	0.3331131	SKCM-US	gender	0.01092143	ICGC	ADGRV1	SVEP1	protein_coding	protein_coding	coding:coding
0.01172319	0.7484206	0.2969488	SKCM-US	gender	0.03347604	ICGC	USH2A	SYNE1	protein_coding	protein_coding	coding:coding
0.001119275	1.029006	0.3157728	SKCM-US	gender	0.01341609	ICGC	COL21A1	TTN	protein_coding	protein_coding	coding:coding
0.002547041	0.9315582	0.3086985	SKCM-US	gender	0.0170768	ICGC	CFTR	TTN	protein_coding	protein_coding	coding:coding
0.0234673	0.661716	0.2920529	SKCM-US	gender	0.04862033	ICGC	SNCAIP	TTN	protein_coding	protein_coding	coding:coding
0.0234673	0.661716	0.2920529	SKCM-US	gender	0.04862033	ICGC	PRDM9	TTN-AS1	protein_coding	none protein_coding	coding:non-coding
0.005583652	0.8382142	0.3024647	SKCM-US	gender	0.02339242	ICGC	GRM3	TTN-AS1	protein_coding	none protein_coding	coding:non-coding
0.0234673	0.661716	0.2920529	SKCM-US	gender	0.04862033	ICGC	ENAM	TTN-AS1	protein_coding	none protein_coding	coding:non-coding
0.005583652	0.8382142	0.3024647	SKCM-US	gender	0.02339242	ICGC	XIRP1	TTN-AS1	protein_coding	none protein_coding	coding:non-coding
0.005583652	0.8382142	0.3024647	SKCM-US	gender	0.02339242	ICGC	RIMS2	TTN-AS1	protein_coding	none protein_coding	coding:non-coding
0.001119275	1.029006	0.3157728	SKCM-US	gender	0.01341609	ICGC	USH2A	ZNF831	protein_coding	protein_coding	coding:coding
0.007132953	0.8152758	0.303012	SKCM-US	gender	0.02587343	ICGC	DNAH7	ACAN	protein_coding	protein_coding	coding:coding
0.0002624362	1.217353	0.3335388	SKCM-US	gender	0.01092143	ICGC	SI	ADGRV1	protein_coding	protein_coding	coding:coding
0.0001089709	1.332118	0.3442435	SKCM-US	gender	0.01092143	ICGC	ZNF831	ADGRV1	protein_coding	protein_coding	coding:coding
0.001456664	1.006705	0.3162575	SKCM-US	gender	0.01409263	ICGC	C6	ADGRV1	protein_coding	protein_coding	coding:coding
0.001456664	1.006705	0.3162575	SKCM-US	gender	0.01409263	ICGC	ASXL3	ANK3	protein_coding	protein_coding	coding:coding
0.003287068	0.9089447	0.3092139	SKCM-US	gender	0.01864516	ICGC	THSD7B	CACNA1E	protein_coding	protein_coding	coding:coding
0.0006252966	1.10923	0.3242986	SKCM-US	gender	0.01196597	ICGC	TTN	CACNA2D3	protein_coding	protein_coding	coding:coding
0.007132953	0.8152758	0.303012	SKCM-US	gender	0.02587343	ICGC	LRP1B	CD163	protein_coding	protein_coding	coding:coding
0.003287068	0.9089447	0.3092139	SKCM-US	gender	0.01864516	ICGC	DNAH5	CD163L1	protein_coding	protein_coding	coding:coding
0.007132953	0.8152758	0.303012	SKCM-US	gender	0.02587343	ICGC	HYDIN	CNTNAP2	protein_coding	protein_coding	coding:coding
0.01480065	0.725144	0.2975291	SKCM-US	gender	0.03795271	ICGC	LRP1B	COL22A1	protein_coding	protein_coding	coding:coding
0.0006252966	1.10923	0.3242986	SKCM-US	gender	0.01196597	ICGC	CSMD3	COL3A1	protein_coding	protein_coding	coding:coding
0.01480065	0.725144	0.2975291	SKCM-US	gender	0.03795271	ICGC	MUC16	CR1	protein_coding	protein_coding	coding:coding
0.003287068	0.9089447	0.3092139	SKCM-US	gender	0.01864516	ICGC	DNAH7	CRB1	protein_coding	protein_coding	coding:coding
0.01480065	0.725144	0.2975291	SKCM-US	gender	0.03795271	ICGC	XIRP2	DMBT1	protein_coding	protein_coding	coding:coding
0.0006252966	1.10923	0.3242986	SKCM-US	gender	0.01196597	ICGC	ANK3	DNAH10	protein_coding	protein_coding	coding:coding
0.01480065	0.725144	0.2975291	SKCM-US	gender	0.03795271	ICGC	OBSCN	DNAH3	protein_coding	protein_coding	coding:coding
0.01480065	0.725144	0.2975291	SKCM-US	gender	0.03795271	ICGC	CSMD1	DSG1-AS1	protein_coding	none protein_coding	coding:non-coding
0.01480065	0.725144	0.2975291	SKCM-US	gender	0.03795271	ICGC	MXRA5	FAM135B	protein_coding	protein_coding	coding:coding
0.001456664	1.006705	0.3162575	SKCM-US	gender	0.01409263	ICGC	USH2A	FAM135B	protein_coding	protein_coding	coding:coding
0.007132953	0.8152758	0.303012	SKCM-US	gender	0.02587343	ICGC	DNAH9	FAT3	protein_coding	protein_coding	coding:coding
0.0006252966	1.10923	0.3242986	SKCM-US	gender	0.01196597	ICGC	SPTA1	FAT3	protein_coding	protein_coding	coding:coding
0.003287068	0.9089447	0.3092139	SKCM-US	gender	0.01864516	ICGC	PCDH15	FAT3	protein_coding	protein_coding	coding:coding
0.01480065	0.725144	0.2975291	SKCM-US	gender	0.03795271	ICGC	DMBT1	FLG-AS1	protein_coding	none protein_coding	coding:non-coding
0.007132953	0.8152758	0.303012	SKCM-US	gender	0.02587343	ICGC	ZNF804A	FLG-AS1	protein_coding	none protein_coding	coding:non-coding
0.003287068	0.9089447	0.3092139	SKCM-US	gender	0.01864516	ICGC	ADAMTS20	FLG-AS1	protein_coding	none protein_coding	coding:non-coding
0.003287068	0.9089447	0.3092139	SKCM-US	gender	0.01864516	ICGC	ANK3	GRIN2A	protein_coding	protein_coding	coding:coding
0.003287068	0.9089447	0.3092139	SKCM-US	gender	0.01864516	ICGC	MXRA5	GRIN2A	protein_coding	protein_coding	coding:coding
8.710005e-06	1.731985	0.3894776	SKCM-US	gender	0.0107732	ICGC	ZNF831	HYDIN	protein_coding	protein_coding	coding:coding
0.001456664	1.006705	0.3162575	SKCM-US	gender	0.01409263	ICGC	DNAH11	HYDIN	protein_coding	protein_coding	coding:coding
0.0006252966	1.10923	0.3242986	SKCM-US	gender	0.01196597	ICGC	ANK3	MMP26	protein_coding	protein_coding	coding:coding
0.003287068	0.9089447	0.3092139	SKCM-US	gender	0.01864516	ICGC	LAMA5	MUC16	protein_coding	protein_coding	coding:coding
0.007132953	0.8152758	0.303012	SKCM-US	gender	0.02587343	ICGC	ENAM	MUC16	protein_coding	protein_coding	coding:coding
0.007132953	0.8152758	0.303012	SKCM-US	gender	0.02587343	ICGC	COL1A1	MUC16	protein_coding	protein_coding	coding:coding
0.007132953	0.8152758	0.303012	SKCM-US	gender	0.02587343	ICGC	ADCY8	MUC16	protein_coding	protein_coding	coding:coding
0.003287068	0.9089447	0.3092139	SKCM-US	gender	0.01864516	ICGC	FAT3	MUC17	protein_coding	protein_coding	coding:coding
0.01480065	0.725144	0.2975291	SKCM-US	gender	0.03795271	ICGC	COL4A4	MXRA5	protein_coding	protein_coding	coding:coding
0.001456664	1.006705	0.3162575	SKCM-US	gender	0.01409263	ICGC	OBSCN	OR51B5	protein_coding	protein_coding	coding:coding
0.003287068	0.9089447	0.3092139	SKCM-US	gender	0.01864516	ICGC	FAT3	OR51B5	protein_coding	protein_coding	coding:coding
0.0006252966	1.10923	0.3242986	SKCM-US	gender	0.01196597	ICGC	THSD7B	PCDHA2	protein_coding	protein_coding	coding:coding
0.003287068	0.9089447	0.3092139	SKCM-US	gender	0.01864516	ICGC	PCDH15	PCDHA9	protein_coding	protein_coding	coding:coding
0.003287068	0.9089447	0.3092139	SKCM-US	gender	0.01864516	ICGC	UNC13C	PCDHA9	protein_coding	protein_coding	coding:coding
0.001456664	1.006705	0.3162575	SKCM-US	gender	0.01409263	ICGC	PAPPA2	PCDHA9	protein_coding	protein_coding	coding:coding
0.003287068	0.9089447	0.3092139	SKCM-US	gender	0.01864516	ICGC	ASXL3	PCDHA9	protein_coding	protein_coding	coding:coding
0.01480065	0.725144	0.2975291	SKCM-US	gender	0.03795271	ICGC	DNAH10	PCDHA9	protein_coding	protein_coding	coding:coding
0.003287068	0.9089447	0.3092139	SKCM-US	gender	0.01864516	ICGC	ZAN	PCDHA9	protein_coding	protein_coding	coding:coding
0.007132953	0.8152758	0.303012	SKCM-US	gender	0.02587343	ICGC	PCDHA2	PCDHGB1	protein_coding	protein_coding	coding:coding
0.003287068	0.9089447	0.3092139	SKCM-US	gender	0.01864516	ICGC	DSP	PCLO	protein_coding	protein_coding	coding:coding
0.001456664	1.006705	0.3162575	SKCM-US	gender	0.01409263	ICGC	CD163L1	PCLO	protein_coding	protein_coding	coding:coding
0.007132953	0.8152758	0.303012	SKCM-US	gender	0.02587343	ICGC	BSN	PCLO	protein_coding	protein_coding	coding:coding
0.01480065	0.725144	0.2975291	SKCM-US	gender	0.03795271	ICGC	EPHA6	PCLO	protein_coding	protein_coding	coding:coding
0.007132953	0.8152758	0.303012	SKCM-US	gender	0.02587343	ICGC	FMN2	PCLO	protein_coding	protein_coding	coding:coding
0.001456664	1.006705	0.3162575	SKCM-US	gender	0.01409263	ICGC	LILRB1	PCLO	protein_coding	protein_coding	coding:coding
0.0002624362	1.217353	0.3335388	SKCM-US	gender	0.01092143	ICGC	DMBT1	PKHD1L1	protein_coding	protein_coding	coding:coding
0.01480065	0.725144	0.2975291	SKCM-US	gender	0.03795271	ICGC	SPTA1	PTPRT	protein_coding	protein_coding	coding:coding
0.01480065	0.725144	0.2975291	SKCM-US	gender	0.03795271	ICGC	CNTNAP2	RYR1	protein_coding	protein_coding	coding:coding
0.01480065	0.725144	0.2975291	SKCM-US	gender	0.03795271	ICGC	SYNE1	RYR2	protein_coding	protein_coding	coding:coding
0.003287068	0.9089447	0.3092139	SKCM-US	gender	0.01864516	ICGC	FAT3	SCN10A	protein_coding	protein_coding	coding:coding
0.003287068	0.9089447	0.3092139	SKCM-US	gender	0.01864516	ICGC	ANK3	SCN10A	protein_coding	protein_coding	coding:coding
0.007132953	0.8152758	0.303012	SKCM-US	gender	0.02587343	ICGC	DNAH5	SNCAIP	protein_coding	protein_coding	coding:coding
0.001456664	1.006705	0.3162575	SKCM-US	gender	0.01409263	ICGC	FAM135B	SPTA1	protein_coding	protein_coding	coding:coding
0.003287068	0.9089447	0.3092139	SKCM-US	gender	0.01864516	ICGC	PCDH15	SPTA1	protein_coding	protein_coding	coding:coding
0.007132953	0.8152758	0.303012	SKCM-US	gender	0.02587343	ICGC	RP1	STXBP5L	protein_coding	protein_coding	coding:coding
0.01480065	0.725144	0.2975291	SKCM-US	gender	0.03795271	ICGC	ANK3	SVEP1	protein_coding	protein_coding	coding:coding
0.007132953	0.8152758	0.303012	SKCM-US	gender	0.02587343	ICGC	DNAH11	THSD7B	protein_coding	protein_coding	coding:coding
0.01480065	0.725144	0.2975291	SKCM-US	gender	0.03795271	ICGC	CSMD2	TNXB	protein_coding	protein_coding	coding:coding
0.007132953	0.8152758	0.303012	SKCM-US	gender	0.02587343	ICGC	STAB2	TTN	protein_coding	protein_coding	coding:coding
0.001456664	1.006705	0.3162575	SKCM-US	gender	0.01409263	ICGC	DSC3	TTN	protein_coding	protein_coding	coding:coding
0.007132953	0.8152758	0.303012	SKCM-US	gender	0.02587343	ICGC	LAMA1	TTN-AS1	protein_coding	none protein_coding	coding:non-coding
0.007132953	0.8152758	0.303012	SKCM-US	gender	0.02587343	ICGC	LRP1B	ZNF804A	protein_coding	protein_coding	coding:coding
0.001891659	0.9840914	0.3167607	SKCM-US	gender	0.01560508	ICGC	ADGRV1	ADAMTS20	protein_coding	protein_coding	coding:coding
0.009084464	0.7919992	0.3035807	SKCM-US	gender	0.029527	ICGC	DNAH11	ANK3	protein_coding	protein_coding	coding:coding
0.01862097	0.7015154	0.2981324	SKCM-US	gender	0.0425944	ICGC	NOS1	ANK3	protein_coding	protein_coding	coding:coding
0.001891659	0.9840914	0.3167607	SKCM-US	gender	0.01560508	ICGC	MXRA5	ASXL3	protein_coding	protein_coding	coding:coding
0.001891659	0.9840914	0.3167607	SKCM-US	gender	0.01560508	ICGC	USH2A	ASXL3	protein_coding	protein_coding	coding:coding
0.009084464	0.7919992	0.3035807	SKCM-US	gender	0.029527	ICGC	RP1	ASXL3	protein_coding	protein_coding	coding:coding
0.009084464	0.7919992	0.3035807	SKCM-US	gender	0.029527	ICGC	HYDIN	CD163	protein_coding	protein_coding	coding:coding
0.004231095	0.8860062	0.3097493	SKCM-US	gender	0.02086762	ICGC	TTN	CFAP54	protein_coding	protein_coding	coding:coding
0.004231095	0.8860062	0.3097493	SKCM-US	gender	0.02086762	ICGC	DNAH5	CNTN5	protein_coding	protein_coding	coding:coding
0.01862097	0.7015154	0.2981324	SKCM-US	gender	0.0425944	ICGC	CSMD2	COL3A1	protein_coding	protein_coding	coding:coding
0.009084464	0.7919992	0.3035807	SKCM-US	gender	0.029527	ICGC	ADGRV1	COL4A5	protein_coding	protein_coding	coding:coding
0.0008176204	1.086929	0.3247706	SKCM-US	gender	0.01267012	ICGC	PCLO	COL4A5	protein_coding	protein_coding	coding:coding
0.001891659	0.9840914	0.3167607	SKCM-US	gender	0.01560508	ICGC	DNAH5	CUBN	protein_coding	protein_coding	coding:coding
0.004231095	0.8860062	0.3097493	SKCM-US	gender	0.02086762	ICGC	LRP1B	DMBT1	protein_coding	protein_coding	coding:coding
0.009084464	0.7919992	0.3035807	SKCM-US	gender	0.029527	ICGC	C6	DNAH7	protein_coding	protein_coding	coding:coding
0.001891659	0.9840914	0.3167607	SKCM-US	gender	0.01560508	ICGC	TTN	ERC2	protein_coding	protein_coding	coding:coding
0.004231095	0.8860062	0.3097493	SKCM-US	gender	0.02086762	ICGC	SYNE1	FAM135B	protein_coding	protein_coding	coding:coding
0.009084464	0.7919992	0.3035807	SKCM-US	gender	0.029527	ICGC	ZFHX4	FAM135B	protein_coding	protein_coding	coding:coding
0.0001434885	1.310406	0.3446555	SKCM-US	gender	0.01092143	ICGC	COL3A1	FLG-AS1	protein_coding	none protein_coding	coding:non-coding
0.01862097	0.7015154	0.2981324	SKCM-US	gender	0.0425944	ICGC	DNAH8	GRIN2A	protein_coding	protein_coding	coding:coding
0.01862097	0.7015154	0.2981324	SKCM-US	gender	0.0425944	ICGC	RP1	GRIN2A	protein_coding	protein_coding	coding:coding
0.004231095	0.8860062	0.3097493	SKCM-US	gender	0.02086762	ICGC	MUC16	GRM3	protein_coding	protein_coding	coding:coding
0.009084464	0.7919992	0.3035807	SKCM-US	gender	0.029527	ICGC	COL4A4	HYDIN	protein_coding	protein_coding	coding:coding
0.01862097	0.7015154	0.2981324	SKCM-US	gender	0.0425944	ICGC	DNAH5	LILRB1	protein_coding	protein_coding	coding:coding
0.009084464	0.7919992	0.3035807	SKCM-US	gender	0.029527	ICGC	TACC2	LRP1B	protein_coding	protein_coding	coding:coding
0.004231095	0.8860062	0.3097493	SKCM-US	gender	0.02086762	ICGC	PCDHB7	LRP1B	protein_coding	protein_coding	coding:coding
0.01862097	0.7015154	0.2981324	SKCM-US	gender	0.0425944	ICGC	DSP	LRP1B	protein_coding	protein_coding	coding:coding
0.01862097	0.7015154	0.2981324	SKCM-US	gender	0.0425944	ICGC	ABCA13	MGAM	protein_coding	protein_coding	coding:coding
0.004231095	0.8860062	0.3097493	SKCM-US	gender	0.02086762	ICGC	CSMD2	MMP26	protein_coding	protein_coding	coding:coding
0.009084464	0.7919992	0.3035807	SKCM-US	gender	0.029527	ICGC	DCDC1	MUC16	protein_coding	protein_coding	coding:coding
0.0008176204	1.086929	0.3247706	SKCM-US	gender	0.01267012	ICGC	PIK3C2G	MUC16	protein_coding	protein_coding	coding:coding
0.004231095	0.8860062	0.3097493	SKCM-US	gender	0.02086762	ICGC	ASXL3	MUC17	protein_coding	protein_coding	coding:coding
0.01862097	0.7015154	0.2981324	SKCM-US	gender	0.0425944	ICGC	COL4A4	NEB	protein_coding	protein_coding	coding:coding
0.004231095	0.8860062	0.3097493	SKCM-US	gender	0.02086762	ICGC	SPTA1	NEB	protein_coding	protein_coding	coding:coding
0.009084464	0.7919992	0.3035807	SKCM-US	gender	0.029527	ICGC	HYDIN	NEB	protein_coding	protein_coding	coding:coding
0.004231095	0.8860062	0.3097493	SKCM-US	gender	0.02086762	ICGC	ASXL3	OBSCN	protein_coding	protein_coding	coding:coding
0.0008176204	1.086929	0.3247706	SKCM-US	gender	0.01267012	ICGC	TTN	PAPPA	protein_coding	protein_coding	coding:coding
0.004231095	0.8860062	0.3097493	SKCM-US	gender	0.02086762	ICGC	ZFHX4	PCDH15	protein_coding	protein_coding	coding:coding
0.009084464	0.7919992	0.3035807	SKCM-US	gender	0.029527	ICGC	UNC13C	PCDH15	protein_coding	protein_coding	coding:coding
0.0008176204	1.086929	0.3247706	SKCM-US	gender	0.01267012	ICGC	PCLO	PCDH18	protein_coding	protein_coding	coding:coding
0.01862097	0.7015154	0.2981324	SKCM-US	gender	0.0425944	ICGC	FAT4	PCDHA2	protein_coding	protein_coding	coding:coding
0.009084464	0.7919992	0.3035807	SKCM-US	gender	0.029527	ICGC	DNAH7	PCDHA2	protein_coding	protein_coding	coding:coding
0.004231095	0.8860062	0.3097493	SKCM-US	gender	0.02086762	ICGC	ANK3	PCDHA2	protein_coding	protein_coding	coding:coding
0.004231095	0.8860062	0.3097493	SKCM-US	gender	0.02086762	ICGC	DNAH10	PCDHGB1	protein_coding	protein_coding	coding:coding
0.0008176204	1.086929	0.3247706	SKCM-US	gender	0.01267012	ICGC	NBEA	PCLO	protein_coding	protein_coding	coding:coding
0.009084464	0.7919992	0.3035807	SKCM-US	gender	0.029527	ICGC	ARMC4	PCLO	protein_coding	protein_coding	coding:coding
0.009084464	0.7919992	0.3035807	SKCM-US	gender	0.029527	ICGC	ZDBF2	PKHD1L1	protein_coding	protein_coding	coding:coding
0.004231095	0.8860062	0.3097493	SKCM-US	gender	0.02086762	ICGC	DNAH5	PLCE1	protein_coding	protein_coding	coding:coding
0.009084464	0.7919992	0.3035807	SKCM-US	gender	0.029527	ICGC	TTN	PLXNA4	protein_coding	protein_coding	coding:coding
0.01862097	0.7015154	0.2981324	SKCM-US	gender	0.0425944	ICGC	DNAH5	PLXNA4	protein_coding	protein_coding	coding:coding
0.01862097	0.7015154	0.2981324	SKCM-US	gender	0.0425944	ICGC	ZFHX4	PTPRT	protein_coding	protein_coding	coding:coding
0.004231095	0.8860062	0.3097493	SKCM-US	gender	0.02086762	ICGC	DNAH5	RGPD4	protein_coding	protein_coding	coding:coding
0.0008176204	1.086929	0.3247706	SKCM-US	gender	0.01267012	ICGC	APOB	RYR1	protein_coding	protein_coding	coding:coding
0.0008176204	1.086929	0.3247706	SKCM-US	gender	0.01267012	ICGC	DNAH9	RYR1	protein_coding	protein_coding	coding:coding
0.009084464	0.7919992	0.3035807	SKCM-US	gender	0.029527	ICGC	OBSCN	RYR2	protein_coding	protein_coding	coding:coding
0.01862097	0.7015154	0.2981324	SKCM-US	gender	0.0425944	ICGC	OBSCN	SCN11A	protein_coding	protein_coding	coding:coding
0.004231095	0.8860062	0.3097493	SKCM-US	gender	0.02086762	ICGC	SPTA1	SCN11A	protein_coding	protein_coding	coding:coding
0.001891659	0.9840914	0.3167607	SKCM-US	gender	0.01560508	ICGC	ANK3	TENM3	protein_coding	protein_coding	coding:coding
0.0003447688	1.195352	0.3339804	SKCM-US	gender	0.01111244	ICGC	DNAH7	TENM3	protein_coding	protein_coding	coding:coding
0.0001434885	1.310406	0.3446555	SKCM-US	gender	0.01092143	ICGC	KCNH5	TTN	protein_coding	protein_coding	coding:coding
0.01862097	0.7015154	0.2981324	SKCM-US	gender	0.0425944	ICGC	FLNB	TTN	protein_coding	protein_coding	coding:coding
0.004231095	0.8860062	0.3097493	SKCM-US	gender	0.02086762	ICGC	PPP1R3A	TTN	protein_coding	protein_coding	coding:coding
0.01862097	0.7015154	0.2981324	SKCM-US	gender	0.0425944	ICGC	SALL1	TTN	protein_coding	protein_coding	coding:coding
0.001891659	0.9840914	0.3167607	SKCM-US	gender	0.01560508	ICGC	SLIT2	TTN	protein_coding	protein_coding	coding:coding
0.004231095	0.8860062	0.3097493	SKCM-US	gender	0.02086762	ICGC	CCDC141	TTN-AS1	protein_coding	none protein_coding	coding:non-coding
0.01862097	0.7015154	0.2981324	SKCM-US	gender	0.0425944	ICGC	HECW1	TTN-AS1	protein_coding	none protein_coding	coding:non-coding
0.0008176204	1.086929	0.3247706	SKCM-US	gender	0.01267012	ICGC	SYNPO2	TTN-AS1	protein_coding	none protein_coding	coding:non-coding
0.009084464	0.7919992	0.3035807	SKCM-US	gender	0.029527	ICGC	MXRA5	UNC13C	protein_coding	protein_coding	coding:coding
0.0001434885	1.310406	0.3446555	SKCM-US	gender	0.01092143	ICGC	DNAH5	UNC79	protein_coding	protein_coding	coding:coding
0.0008176204	1.086929	0.3247706	SKCM-US	gender	0.01267012	ICGC	PCLO	ZDBF2	protein_coding	protein_coding	coding:coding
5.982521e-05	1.433434	0.3571532	SKCM-US	gender	0.01092143	ICGC	CSMD2	ZNF831	protein_coding	protein_coding	coding:coding
0.0001434885	1.310406	0.3446555	SKCM-US	gender	0.01092143	ICGC	DNAH7	ZNF831	protein_coding	protein_coding	coding:coding
0.01153346	0.7683706	0.3041719	SKCM-US	gender	0.03347604	ICGC	LRP1B	ABCA13	protein_coding	protein_coding	coding:coding
0.00543157	0.8627297	0.3103056	SKCM-US	gender	0.02329325	ICGC	MUC16	ABCA4	protein_coding	protein_coding	coding:coding
0.001067165	1.064316	0.3252606	SKCM-US	gender	0.01330394	ICGC	DNAH5	ACAN	protein_coding	protein_coding	coding:coding
0.023343	0.6775199	0.2987599	SKCM-US	gender	0.04862033	ICGC	DNAH5	ANK2	protein_coding	protein_coding	coding:coding
0.001067165	1.064316	0.3252606	SKCM-US	gender	0.01330394	ICGC	LRP2	APOB	protein_coding	protein_coding	coding:coding
0.023343	0.6775199	0.2987599	SKCM-US	gender	0.04862033	ICGC	DNAH5	CACNA1C	protein_coding	protein_coding	coding:coding
0.01153346	0.7683706	0.3041719	SKCM-US	gender	0.03347604	ICGC	CSMD2	COL22A1	protein_coding	protein_coding	coding:coding
0.01153346	0.7683706	0.3041719	SKCM-US	gender	0.03347604	ICGC	LRP1B	COL4A5	protein_coding	protein_coding	coding:coding
0.0004523023	1.173051	0.3344387	SKCM-US	gender	0.01156321	ICGC	SVEP1	CSMD1	protein_coding	protein_coding	coding:coding
0.023343	0.6775199	0.2987599	SKCM-US	gender	0.04862033	ICGC	CSMD2	DMBT1	protein_coding	protein_coding	coding:coding
0.00543157	0.8627297	0.3103056	SKCM-US	gender	0.02329325	ICGC	ADGRV1	DNAH2	protein_coding	protein_coding	coding:coding
0.0004523023	1.173051	0.3344387	SKCM-US	gender	0.01156321	ICGC	MXRA5	DNAH3	protein_coding	protein_coding	coding:coding
0.0004523023	1.173051	0.3344387	SKCM-US	gender	0.01156321	ICGC	PCDHB7	DNAH7	protein_coding	protein_coding	coding:coding
0.001067165	1.064316	0.3252606	SKCM-US	gender	0.01330394	ICGC	ZNF831	DNAH8	protein_coding	protein_coding	coding:coding
0.002451039	0.961153	0.3172833	SKCM-US	gender	0.01685627	ICGC	DNAH5	ERICH3	protein_coding	protein_coding	coding:coding
0.002451039	0.961153	0.3172833	SKCM-US	gender	0.01685627	ICGC	SPHKAP	FAT3	protein_coding	protein_coding	coding:coding
0.0004523023	1.173051	0.3344387	SKCM-US	gender	0.01156321	ICGC	FAM135B	FAT3	protein_coding	protein_coding	coding:coding
0.001067165	1.064316	0.3252606	SKCM-US	gender	0.01330394	ICGC	STXBP5L	FAT4	protein_coding	protein_coding	coding:coding
0.01153346	0.7683706	0.3041719	SKCM-US	gender	0.03347604	ICGC	C6	FAT4	protein_coding	protein_coding	coding:coding
0.002451039	0.961153	0.3172833	SKCM-US	gender	0.01685627	ICGC	COL5A1	FLG-AS1	protein_coding	none protein_coding	coding:non-coding
0.001067165	1.064316	0.3252606	SKCM-US	gender	0.01330394	ICGC	MUC17	GRIN2A	protein_coding	protein_coding	coding:coding
0.001067165	1.064316	0.3252606	SKCM-US	gender	0.01330394	ICGC	PAPPA2	HYDIN	protein_coding	protein_coding	coding:coding
0.001067165	1.064316	0.3252606	SKCM-US	gender	0.01330394	ICGC	SI	HYDIN	protein_coding	protein_coding	coding:coding
3.34146e-05	1.544765	0.3723354	SKCM-US	gender	0.01092143	ICGC	DNAH5	KCNH5	protein_coding	protein_coding	coding:coding
0.002451039	0.961153	0.3172833	SKCM-US	gender	0.01685627	ICGC	LRP1B	LPA	protein_coding	protein_coding	coding:coding
0.001067165	1.064316	0.3252606	SKCM-US	gender	0.01330394	ICGC	COL3A1	LRP1B	protein_coding	protein_coding	coding:coding
0.01153346	0.7683706	0.3041719	SKCM-US	gender	0.03347604	ICGC	COL4A5	MGAM	protein_coding	protein_coding	coding:coding
0.023343	0.6775199	0.2987599	SKCM-US	gender	0.04862033	ICGC	TRANK1	MGAM	protein_coding	protein_coding	coding:coding
0.002451039	0.961153	0.3172833	SKCM-US	gender	0.01685627	ICGC	RP1	MMP26	protein_coding	protein_coding	coding:coding
0.002451039	0.961153	0.3172833	SKCM-US	gender	0.01685627	ICGC	SPTA1	MMP26	protein_coding	protein_coding	coding:coding
0.00543157	0.8627297	0.3103056	SKCM-US	gender	0.02329325	ICGC	ROS1	MUC16	protein_coding	protein_coding	coding:coding
0.023343	0.6775199	0.2987599	SKCM-US	gender	0.04862033	ICGC	SLC8A3	MUC16	protein_coding	protein_coding	coding:coding
0.00543157	0.8627297	0.3103056	SKCM-US	gender	0.02329325	ICGC	SPHKAP	MUC17	protein_coding	protein_coding	coding:coding
0.002451039	0.961153	0.3172833	SKCM-US	gender	0.01685627	ICGC	OR51B5	NEB	protein_coding	protein_coding	coding:coding
0.01153346	0.7683706	0.3041719	SKCM-US	gender	0.03347604	ICGC	CSMD1	NPAP1	protein_coding	protein_coding	coding:coding
0.023343	0.6775199	0.2987599	SKCM-US	gender	0.04862033	ICGC	STXBP5L	OBSCN	protein_coding	protein_coding	coding:coding
0.01153346	0.7683706	0.3041719	SKCM-US	gender	0.03347604	ICGC	MXRA5	OR51B5	protein_coding	protein_coding	coding:coding
0.001067165	1.064316	0.3252606	SKCM-US	gender	0.01330394	ICGC	PCDHA9	PCDHA2	protein_coding	protein_coding	coding:coding
0.001067165	1.064316	0.3252606	SKCM-US	gender	0.01330394	ICGC	CD163	PCDHA9	protein_coding	protein_coding	coding:coding
0.023343	0.6775199	0.2987599	SKCM-US	gender	0.04862033	ICGC	SVEP1	PCDHGB1	protein_coding	protein_coding	coding:coding
0.023343	0.6775199	0.2987599	SKCM-US	gender	0.04862033	ICGC	KCNB2	PCLO	protein_coding	protein_coding	coding:coding
0.023343	0.6775199	0.2987599	SKCM-US	gender	0.04862033	ICGC	NOS1	PCLO	protein_coding	protein_coding	coding:coding
0.01153346	0.7683706	0.3041719	SKCM-US	gender	0.03347604	ICGC	MACF1	PCLO	protein_coding	protein_coding	coding:coding
0.002451039	0.961153	0.3172833	SKCM-US	gender	0.01685627	ICGC	MYO18B	PCLO	protein_coding	protein_coding	coding:coding
0.0004523023	1.173051	0.3344387	SKCM-US	gender	0.01156321	ICGC	CRB1	PCLO	protein_coding	protein_coding	coding:coding
0.001067165	1.064316	0.3252606	SKCM-US	gender	0.01330394	ICGC	SCN10A	PKHD1L1	protein_coding	protein_coding	coding:coding
0.002451039	0.961153	0.3172833	SKCM-US	gender	0.01685627	ICGC	PTPRT	PKHD1L1	protein_coding	protein_coding	coding:coding
0.023343	0.6775199	0.2987599	SKCM-US	gender	0.04862033	ICGC	SPHKAP	PTPRT	protein_coding	protein_coding	coding:coding
0.0004523023	1.173051	0.3344387	SKCM-US	gender	0.01156321	ICGC	OBSCN	RYR1	protein_coding	protein_coding	coding:coding
0.001067165	1.064316	0.3252606	SKCM-US	gender	0.01330394	ICGC	SPTA1	RYR1	protein_coding	protein_coding	coding:coding
3.34146e-05	1.544765	0.3723354	SKCM-US	gender	0.01092143	ICGC	HYDIN	RYR1	protein_coding	protein_coding	coding:coding
0.001067165	1.064316	0.3252606	SKCM-US	gender	0.01330394	ICGC	ANK3	RYR2	protein_coding	protein_coding	coding:coding
0.001067165	1.064316	0.3252606	SKCM-US	gender	0.01330394	ICGC	DNAH7	SCN10A	protein_coding	protein_coding	coding:coding
7.870195e-05	1.411723	0.3575503	SKCM-US	gender	0.01092143	ICGC	HYDIN	SCN10A	protein_coding	protein_coding	coding:coding
0.023343	0.6775199	0.2987599	SKCM-US	gender	0.04862033	ICGC	BRAF	SCN11A	protein_coding	protein_coding	coding:coding
0.023343	0.6775199	0.2987599	SKCM-US	gender	0.04862033	ICGC	DNAH5	SLIT3	protein_coding	protein_coding	coding:coding
0.01153346	0.7683706	0.3041719	SKCM-US	gender	0.03347604	ICGC	ZAN	SPTA1	protein_coding	protein_coding	coding:coding
0.00543157	0.8627297	0.3103056	SKCM-US	gender	0.02329325	ICGC	DNAH8	SVEP1	protein_coding	protein_coding	coding:coding
0.0004523023	1.173051	0.3344387	SKCM-US	gender	0.01156321	ICGC	HYDIN	SVEP1	protein_coding	protein_coding	coding:coding
3.34146e-05	1.544765	0.3723354	SKCM-US	gender	0.01092143	ICGC	HYDIN	TENM3	protein_coding	protein_coding	coding:coding
0.002451039	0.961153	0.3172833	SKCM-US	gender	0.01685627	ICGC	DNAH8	TENM3	protein_coding	protein_coding	coding:coding
0.023343	0.6775199	0.2987599	SKCM-US	gender	0.04862033	ICGC	ANK3	TNXB	protein_coding	protein_coding	coding:coding
0.023343	0.6775199	0.2987599	SKCM-US	gender	0.04862033	ICGC	PXDNL	TTN	protein_coding	protein_coding	coding:coding
0.023343	0.6775199	0.2987599	SKCM-US	gender	0.04862033	ICGC	COL5A3	TTN	protein_coding	protein_coding	coding:coding
0.01153346	0.7683706	0.3041719	SKCM-US	gender	0.03347604	ICGC	LRP1	TTN	protein_coding	protein_coding	coding:coding
0.002451039	0.961153	0.3172833	SKCM-US	gender	0.01685627	ICGC	FBN3	TTN	protein_coding	protein_coding	coding:coding
0.023343	0.6775199	0.2987599	SKCM-US	gender	0.04862033	ICGC	GRIA1	TTN-AS1	protein_coding	none protein_coding	coding:non-coding
0.00543157	0.8627297	0.3103056	SKCM-US	gender	0.02329325	ICGC	DSCAML1	TTN-AS1	protein_coding	none protein_coding	coding:non-coding
0.023343	0.6775199	0.2987599	SKCM-US	gender	0.04862033	ICGC	MBD5	TTN-AS1	protein_coding	none protein_coding	coding:non-coding
0.023343	0.6775199	0.2987599	SKCM-US	gender	0.04862033	ICGC	DCDC1	TTN-AS1	protein_coding	none protein_coding	coding:non-coding
0.023343	0.6775199	0.2987599	SKCM-US	gender	0.04862033	ICGC	DNAH9	UNC13C	protein_coding	protein_coding	coding:coding
0.00543157	0.8627297	0.3103056	SKCM-US	gender	0.02329325	ICGC	DNAH5	ZDBF2	protein_coding	protein_coding	coding:coding
0.00543157	0.8627297	0.3103056	SKCM-US	gender	0.02329325	ICGC	USH2A	ZFHX4	protein_coding	protein_coding	coding:coding
0.002451039	0.961153	0.3172833	SKCM-US	gender	0.01685627	ICGC	PCLO	ZIM2	protein_coding	protein_coding	coding:coding
0.0001887526	1.288406	0.3450829	SKCM-US	gender	0.01092143	ICGC	RP1	ZNF831	protein_coding	protein_coding	coding:coding
0.003168416	0.9378764	0.3178264	SKCM-US	gender	0.01830486	ICGC	DNAH11	AC005323.2	protein_coding	none protein_coding	coding:non-coding
0.01459485	0.7443751	0.304787	SKCM-US	gender	0.03772207	ICGC	MMP26	AC005323.2	protein_coding	none protein_coding	coding:non-coding
0.01459485	0.7443751	0.304787	SKCM-US	gender	0.03772207	ICGC	THSD7B	ADAMTS20	protein_coding	protein_coding	coding:coding
0.006953139	0.8391011	0.3108841	SKCM-US	gender	0.02566865	ICGC	FMN2	ADGRV1	protein_coding	protein_coding	coding:coding
0.001390248	1.041377	0.3257696	SKCM-US	gender	0.01392089	ICGC	ACAN	ADGRV1	protein_coding	protein_coding	coding:coding
0.001390248	1.041377	0.3257696	SKCM-US	gender	0.01392089	ICGC	SORCS3	ADGRV1	protein_coding	protein_coding	coding:coding
0.0005925159	1.150437	0.3349146	SKCM-US	gender	0.0118691	ICGC	SI	ANK3	protein_coding	protein_coding	coding:coding
0.006953139	0.8391011	0.3108841	SKCM-US	gender	0.02566865	ICGC	STXBP5L	ANK3	protein_coding	protein_coding	coding:coding
0.006953139	0.8391011	0.3108841	SKCM-US	gender	0.02566865	ICGC	DNAH7	CD163	protein_coding	protein_coding	coding:coding
0.01459485	0.7443751	0.304787	SKCM-US	gender	0.03772207	ICGC	MMP26	CNTNAP2	protein_coding	protein_coding	coding:coding
0.006953139	0.8391011	0.3108841	SKCM-US	gender	0.02566865	ICGC	DNAH7	COL5A1	protein_coding	protein_coding	coding:coding
0.006953139	0.8391011	0.3108841	SKCM-US	gender	0.02566865	ICGC	COL3A1	CSMD1	protein_coding	protein_coding	coding:coding
0.006953139	0.8391011	0.3108841	SKCM-US	gender	0.02566865	ICGC	ZNF804A	CSMD1	protein_coding	protein_coding	coding:coding
0.0005925159	1.150437	0.3349146	SKCM-US	gender	0.0118691	ICGC	SI	CSMD2	protein_coding	protein_coding	coding:coding
0.001390248	1.041377	0.3257696	SKCM-US	gender	0.01392089	ICGC	C6	CSMD2	protein_coding	protein_coding	coding:coding
0.01459485	0.7443751	0.304787	SKCM-US	gender	0.03772207	ICGC	APOB	DNAH10	protein_coding	protein_coding	coding:coding
0.0005925159	1.150437	0.3349146	SKCM-US	gender	0.0118691	ICGC	NEB	DNAH10	protein_coding	protein_coding	coding:coding
0.006953139	0.8391011	0.3108841	SKCM-US	gender	0.02566865	ICGC	COL4A4	DNAH3	protein_coding	protein_coding	coding:coding
0.006953139	0.8391011	0.3108841	SKCM-US	gender	0.02566865	ICGC	PCDH15	DNAH3	protein_coding	protein_coding	coding:coding
0.006953139	0.8391011	0.3108841	SKCM-US	gender	0.02566865	ICGC	OR51B5	DSCAM	protein_coding	protein_coding	coding:coding
0.01459485	0.7443751	0.304787	SKCM-US	gender	0.03772207	ICGC	ADGRV1	DSG1-AS1	protein_coding	none protein_coding	coding:non-coding
0.003168416	0.9378764	0.3178264	SKCM-US	gender	0.01830486	ICGC	ZNF831	FAT4	protein_coding	protein_coding	coding:coding
0.003168416	0.9378764	0.3178264	SKCM-US	gender	0.01830486	ICGC	RELN	FLG-AS1	protein_coding	none protein_coding	coding:non-coding
0.0002480381	1.266105	0.3455264	SKCM-US	gender	0.01092143	ICGC	SVEP1	FLG-AS1	protein_coding	none protein_coding	coding:non-coding
0.006953139	0.8391011	0.3108841	SKCM-US	gender	0.02566865	ICGC	SYNE1	GRIN2A	protein_coding	protein_coding	coding:coding
0.006953139	0.8391011	0.3108841	SKCM-US	gender	0.02566865	ICGC	TTN	GRIN2B	protein_coding	protein_coding	coding:coding
0.001390248	1.041377	0.3257696	SKCM-US	gender	0.01392089	ICGC	MUC16	GRIN3A	protein_coding	protein_coding	coding:coding
0.0002480381	1.266105	0.3455264	SKCM-US	gender	0.01092143	ICGC	PCLO	LPA	protein_coding	protein_coding	coding:coding
0.01459485	0.7443751	0.304787	SKCM-US	gender	0.03772207	ICGC	MAGEC1	LRP1B	protein_coding	protein_coding	coding:coding
0.001390248	1.041377	0.3257696	SKCM-US	gender	0.01392089	ICGC	MYO18B	LRP1B	protein_coding	protein_coding	coding:coding
0.001390248	1.041377	0.3257696	SKCM-US	gender	0.01392089	ICGC	DOCK3	LRP1B	protein_coding	protein_coding	coding:coding
0.006953139	0.8391011	0.3108841	SKCM-US	gender	0.02566865	ICGC	USH2A	LRP2	protein_coding	protein_coding	coding:coding
0.01459485	0.7443751	0.304787	SKCM-US	gender	0.03772207	ICGC	MUC16	MBD5	protein_coding	protein_coding	coding:coding
0.003168416	0.9378764	0.3178264	SKCM-US	gender	0.01830486	ICGC	TACC2	MGAM	protein_coding	protein_coding	coding:coding
0.001390248	1.041377	0.3257696	SKCM-US	gender	0.01392089	ICGC	FAT3	MMP26	protein_coding	protein_coding	coding:coding
0.01459485	0.7443751	0.304787	SKCM-US	gender	0.03772207	ICGC	GRIA1	MUC16	protein_coding	protein_coding	coding:coding
0.006953139	0.8391011	0.3108841	SKCM-US	gender	0.02566865	ICGC	MYH15	MUC16	protein_coding	protein_coding	coding:coding
0.01459485	0.7443751	0.304787	SKCM-US	gender	0.03772207	ICGC	CCDC141	MUC16	protein_coding	protein_coding	coding:coding
0.006953139	0.8391011	0.3108841	SKCM-US	gender	0.02566865	ICGC	AHNAK	MUC16	protein_coding	protein_coding	coding:coding
0.0002480381	1.266105	0.3455264	SKCM-US	gender	0.01092143	ICGC	SYNPO2	MUC16	protein_coding	protein_coding	coding:coding
0.01459485	0.7443751	0.304787	SKCM-US	gender	0.03772207	ICGC	COL4A4	MUC17	protein_coding	protein_coding	coding:coding
0.006953139	0.8391011	0.3108841	SKCM-US	gender	0.02566865	ICGC	SCN11A	NEB	protein_coding	protein_coding	coding:coding
0.006953139	0.8391011	0.3108841	SKCM-US	gender	0.02566865	ICGC	APOB	NEB	protein_coding	protein_coding	coding:coding
0.01459485	0.7443751	0.304787	SKCM-US	gender	0.03772207	ICGC	USH2A	NEB	protein_coding	protein_coding	coding:coding
0.001390248	1.041377	0.3257696	SKCM-US	gender	0.01392089	ICGC	PCDH15	OR51B5	protein_coding	protein_coding	coding:coding
0.01459485	0.7443751	0.304787	SKCM-US	gender	0.03772207	ICGC	TTN	OTOGL	protein_coding	protein_coding	coding:coding
0.01459485	0.7443751	0.304787	SKCM-US	gender	0.03772207	ICGC	LRP2	PCDH15	protein_coding	protein_coding	coding:coding
0.0001034673	1.389722	0.3579623	SKCM-US	gender	0.01092143	ICGC	RYR1	PCDHA9	protein_coding	protein_coding	coding:coding
0.001390248	1.041377	0.3257696	SKCM-US	gender	0.01392089	ICGC	SCN10A	PCDHA9	protein_coding	protein_coding	coding:coding
1.930795e-05	1.668482	0.3904941	SKCM-US	gender	0.01092143	ICGC	KCNH5	PCLO	protein_coding	protein_coding	coding:coding
0.003168416	0.9378764	0.3178264	SKCM-US	gender	0.01830486	ICGC	COL21A1	PCLO	protein_coding	protein_coding	coding:coding
0.006953139	0.8391011	0.3108841	SKCM-US	gender	0.02566865	ICGC	PPP1R3A	PCLO	protein_coding	protein_coding	coding:coding
0.003168416	0.9378764	0.3178264	SKCM-US	gender	0.01830486	ICGC	DNAH5	PDZD2	protein_coding	protein_coding	coding:coding
0.003168416	0.9378764	0.3178264	SKCM-US	gender	0.01830486	ICGC	AHNAK2	PKHD1L1	protein_coding	protein_coding	coding:coding
0.01459485	0.7443751	0.304787	SKCM-US	gender	0.03772207	ICGC	HYDIN	PTPRT	protein_coding	protein_coding	coding:coding
0.0002480381	1.266105	0.3455264	SKCM-US	gender	0.01092143	ICGC	PCDH15	RYR1	protein_coding	protein_coding	coding:coding
0.0002480381	1.266105	0.3455264	SKCM-US	gender	0.01092143	ICGC	MUC17	RYR1	protein_coding	protein_coding	coding:coding
0.006953139	0.8391011	0.3108841	SKCM-US	gender	0.02566865	ICGC	MMP26	RYR1	protein_coding	protein_coding	coding:coding
0.0002480381	1.266105	0.3455264	SKCM-US	gender	0.01092143	ICGC	THSD7B	RYR1	protein_coding	protein_coding	coding:coding
0.01459485	0.7443751	0.304787	SKCM-US	gender	0.03772207	ICGC	ZFHX4	RYR2	protein_coding	protein_coding	coding:coding
0.01459485	0.7443751	0.304787	SKCM-US	gender	0.03772207	ICGC	ZAN	RYR2	protein_coding	protein_coding	coding:coding
0.0005925159	1.150437	0.3349146	SKCM-US	gender	0.0118691	ICGC	MXRA5	RYR2	protein_coding	protein_coding	coding:coding
0.001390248	1.041377	0.3257696	SKCM-US	gender	0.01392089	ICGC	MUC17	SCN10A	protein_coding	protein_coding	coding:coding
0.01459485	0.7443751	0.304787	SKCM-US	gender	0.03772207	ICGC	MXRA5	SCN10A	protein_coding	protein_coding	coding:coding
0.006953139	0.8391011	0.3108841	SKCM-US	gender	0.02566865	ICGC	ZFHX4	SCN11A	protein_coding	protein_coding	coding:coding
0.003168416	0.9378764	0.3178264	SKCM-US	gender	0.01830486	ICGC	TTN	SCN9A	protein_coding	protein_coding	coding:coding
0.01459485	0.7443751	0.304787	SKCM-US	gender	0.03772207	ICGC	DNAH5	SLIT2	protein_coding	protein_coding	coding:coding
0.001390248	1.041377	0.3257696	SKCM-US	gender	0.01392089	ICGC	DNAH7	STXBP5L	protein_coding	protein_coding	coding:coding
0.006953139	0.8391011	0.3108841	SKCM-US	gender	0.02566865	ICGC	CSMD3	SVEP1	protein_coding	protein_coding	coding:coding
0.003168416	0.9378764	0.3178264	SKCM-US	gender	0.01830486	ICGC	DNAH7	SVEP1	protein_coding	protein_coding	coding:coding
0.003168416	0.9378764	0.3178264	SKCM-US	gender	0.01830486	ICGC	XIRP2	SVEP1	protein_coding	protein_coding	coding:coding
0.0005925159	1.150437	0.3349146	SKCM-US	gender	0.0118691	ICGC	BRAF	SVEP1	protein_coding	protein_coding	coding:coding
0.0005925159	1.150437	0.3349146	SKCM-US	gender	0.0118691	ICGC	ZAN	SVEP1	protein_coding	protein_coding	coding:coding
0.003168416	0.9378764	0.3178264	SKCM-US	gender	0.01830486	ICGC	FAT4	TENM3	protein_coding	protein_coding	coding:coding
0.006953139	0.8391011	0.3108841	SKCM-US	gender	0.02566865	ICGC	PAPPA2	THSD7B	protein_coding	protein_coding	coding:coding
0.01459485	0.7443751	0.304787	SKCM-US	gender	0.03772207	ICGC	HYDIN	TRANK1	protein_coding	protein_coding	coding:coding
0.01459485	0.7443751	0.304787	SKCM-US	gender	0.03772207	ICGC	ANK2	TTN	protein_coding	protein_coding	coding:coding
0.001390248	1.041377	0.3257696	SKCM-US	gender	0.01392089	ICGC	MYOCD	TTN	protein_coding	protein_coding	coding:coding
0.0005925159	1.150437	0.3349146	SKCM-US	gender	0.0118691	ICGC	CUBN	TTN	protein_coding	protein_coding	coding:coding
0.01459485	0.7443751	0.304787	SKCM-US	gender	0.03772207	ICGC	TENM4	TTN-AS1	protein_coding	none protein_coding	coding:non-coding
0.0002480381	1.266105	0.3455264	SKCM-US	gender	0.01092143	ICGC	MYO3A	TTN-AS1	protein_coding	none protein_coding	coding:non-coding
0.003168416	0.9378764	0.3178264	SKCM-US	gender	0.01830486	ICGC	KEL	TTN-AS1	protein_coding	none protein_coding	coding:non-coding
0.006953139	0.8391011	0.3108841	SKCM-US	gender	0.02566865	ICGC	ACSM2B	TTN-AS1	protein_coding	none protein_coding	coding:non-coding
0.006953139	0.8391011	0.3108841	SKCM-US	gender	0.02566865	ICGC	GRID2	TTN-AS1	protein_coding	none protein_coding	coding:non-coding
0.001390248	1.041377	0.3257696	SKCM-US	gender	0.01392089	ICGC	PIK3C2G	TTN-AS1	protein_coding	none protein_coding	coding:non-coding
0.003168416	0.9378764	0.3178264	SKCM-US	gender	0.01830486	ICGC	TEX15	TTN-AS1	protein_coding	none protein_coding	coding:non-coding
0.01459485	0.7443751	0.304787	SKCM-US	gender	0.03772207	ICGC	NEBL	TTN-AS1	protein_coding	none protein_coding	coding:non-coding
0.01459485	0.7443751	0.304787	SKCM-US	gender	0.03772207	ICGC	LRP2	ZFHX4	protein_coding	protein_coding	coding:coding
0.003168416	0.9378764	0.3178264	SKCM-US	gender	0.01830486	ICGC	DNAH5	ZIM2	protein_coding	protein_coding	coding:coding
0.006953139	0.8391011	0.3108841	SKCM-US	gender	0.02566865	ICGC	ADGRV1	ZNF804A	protein_coding	protein_coding	coding:coding
0.008875062	0.8151056	0.3114859	SKCM-US	gender	0.0292264	ICGC	SCN11A	AC005323.2	protein_coding	none protein_coding	coding:non-coding
0.004085798	0.9142478	0.3183912	SKCM-US	gender	0.02034059	ICGC	SVEP1	AC005323.2	protein_coding	none protein_coding	coding:non-coding
0.01840624	0.719997	0.3054274	SKCM-US	gender	0.04234115	ICGC	CRB1	ADGRV1	protein_coding	protein_coding	coding:coding
0.008875062	0.8151056	0.3114859	SKCM-US	gender	0.0292264	ICGC	EPHA6	ADGRV1	protein_coding	protein_coding	coding:coding
0.0007750206	1.127499	0.3354089	SKCM-US	gender	0.01246551	ICGC	ANKRD30A	ADGRV1	protein_coding	protein_coding	coding:coding
0.01840624	0.719997	0.3054274	SKCM-US	gender	0.04234115	ICGC	C6	APOB	protein_coding	protein_coding	coding:coding
0.01840624	0.719997	0.3054274	SKCM-US	gender	0.04234115	ICGC	ADGRV1	ARMC4	protein_coding	protein_coding	coding:coding
0.0007750206	1.127499	0.3354089	SKCM-US	gender	0.01246551	ICGC	TTN	BRINP3	protein_coding	protein_coding	coding:coding
0.01840624	0.719997	0.3054274	SKCM-US	gender	0.04234115	ICGC	DNAH8	CACNA1E	protein_coding	protein_coding	coding:coding
0.01840624	0.719997	0.3054274	SKCM-US	gender	0.04234115	ICGC	DNAH9	CACNA1E	protein_coding	protein_coding	coding:coding
0.01840624	0.719997	0.3054274	SKCM-US	gender	0.04234115	ICGC	CSMD3	CACNA1E	protein_coding	protein_coding	coding:coding
0.008875062	0.8151056	0.3114859	SKCM-US	gender	0.0292264	ICGC	ADGRV1	CD163L1	protein_coding	protein_coding	coding:coding
0.001807588	1.018101	0.3262986	SKCM-US	gender	0.01532973	ICGC	DNAH5	CFAP54	protein_coding	protein_coding	coding:coding
0.008875062	0.8151056	0.3114859	SKCM-US	gender	0.0292264	ICGC	XIRP2	CMYA5	protein_coding	protein_coding	coding:coding
0.004085798	0.9142478	0.3183912	SKCM-US	gender	0.02034059	ICGC	DNAH7	CMYA5	protein_coding	protein_coding	coding:coding
0.008875062	0.8151056	0.3114859	SKCM-US	gender	0.0292264	ICGC	MUC17	CNTNAP2	protein_coding	protein_coding	coding:coding
0.001807588	1.018101	0.3262986	SKCM-US	gender	0.01532973	ICGC	FAT3	CNTNAP2	protein_coding	protein_coding	coding:coding
0.008875062	0.8151056	0.3114859	SKCM-US	gender	0.0292264	ICGC	TTN	COL14A1	protein_coding	protein_coding	coding:coding
0.0007750206	1.127499	0.3354089	SKCM-US	gender	0.01246551	ICGC	HYDIN	COL3A1	protein_coding	protein_coding	coding:coding
0.01840624	0.719997	0.3054274	SKCM-US	gender	0.04234115	ICGC	TTN	CPAMD8	protein_coding	protein_coding	coding:coding
0.008875062	0.8151056	0.3114859	SKCM-US	gender	0.0292264	ICGC	PTPRB	CSMD1	protein_coding	protein_coding	coding:coding
0.008875062	0.8151056	0.3114859	SKCM-US	gender	0.0292264	ICGC	C6	CSMD1	protein_coding	protein_coding	coding:coding
0.004085798	0.9142478	0.3183912	SKCM-US	gender	0.02034059	ICGC	CRB1	CSMD1	protein_coding	protein_coding	coding:coding
0.001807588	1.018101	0.3262986	SKCM-US	gender	0.01532973	ICGC	MXRA5	DNAH10	protein_coding	protein_coding	coding:coding
0.008875062	0.8151056	0.3114859	SKCM-US	gender	0.0292264	ICGC	DNAH5	DPYD	protein_coding	protein_coding	coding:coding
0.01840624	0.719997	0.3054274	SKCM-US	gender	0.04234115	ICGC	ZFHX4	FAT3	protein_coding	protein_coding	coding:coding
0.008875062	0.8151056	0.3114859	SKCM-US	gender	0.0292264	ICGC	SI	FAT4	protein_coding	protein_coding	coding:coding
0.004085798	0.9142478	0.3183912	SKCM-US	gender	0.02034059	ICGC	DMBT1	FAT4	protein_coding	protein_coding	coding:coding
0.01840624	0.719997	0.3054274	SKCM-US	gender	0.04234115	ICGC	PTPRT	FAT4	protein_coding	protein_coding	coding:coding
0.001807588	1.018101	0.3262986	SKCM-US	gender	0.01532973	ICGC	ACAN	FAT4	protein_coding	protein_coding	coding:coding
0.0007750206	1.127499	0.3354089	SKCM-US	gender	0.01246551	ICGC	CRB1	FLG-AS1	protein_coding	none protein_coding	coding:non-coding
0.0007750206	1.127499	0.3354089	SKCM-US	gender	0.01246551	ICGC	ZDBF2	FLG-AS1	protein_coding	none protein_coding	coding:non-coding
0.0007750206	1.127499	0.3354089	SKCM-US	gender	0.01246551	ICGC	MED12L	FLG-AS1	protein_coding	none protein_coding	coding:non-coding
0.004085798	0.9142478	0.3183912	SKCM-US	gender	0.02034059	ICGC	FLNC	FLG-AS1	protein_coding	none protein_coding	coding:non-coding
0.004085798	0.9142478	0.3183912	SKCM-US	gender	0.02034059	ICGC	ADAMTS18	FLG-AS1	protein_coding	none protein_coding	coding:non-coding
0.01840624	0.719997	0.3054274	SKCM-US	gender	0.04234115	ICGC	DNAH7	FLNC	protein_coding	protein_coding	coding:coding
0.004085798	0.9142478	0.3183912	SKCM-US	gender	0.02034059	ICGC	PRUNE2	HYDIN	protein_coding	protein_coding	coding:coding
0.008875062	0.8151056	0.3114859	SKCM-US	gender	0.0292264	ICGC	PTPRD	HYDIN	protein_coding	protein_coding	coding:coding
0.008875062	0.8151056	0.3114859	SKCM-US	gender	0.0292264	ICGC	TACC2	HYDIN	protein_coding	protein_coding	coding:coding
0.01840624	0.719997	0.3054274	SKCM-US	gender	0.04234115	ICGC	DNAH5	IGSF1	protein_coding	protein_coding	coding:coding
0.008875062	0.8151056	0.3114859	SKCM-US	gender	0.0292264	ICGC	DNAH5	KALRN	protein_coding	protein_coding	coding:coding
0.0007750206	1.127499	0.3354089	SKCM-US	gender	0.01246551	ICGC	ADGRV1	LPA	protein_coding	protein_coding	coding:coding
0.0007750206	1.127499	0.3354089	SKCM-US	gender	0.01246551	ICGC	CSMD2	LPA	protein_coding	protein_coding	coding:coding
0.001807588	1.018101	0.3262986	SKCM-US	gender	0.01532973	ICGC	DNAH7	LPA	protein_coding	protein_coding	coding:coding
0.004085798	0.9142478	0.3183912	SKCM-US	gender	0.02034059	ICGC	ADAMTS18	LRP1B	protein_coding	protein_coding	coding:coding
0.01840624	0.719997	0.3054274	SKCM-US	gender	0.04234115	ICGC	PTPRB	LRP1B	protein_coding	protein_coding	coding:coding
0.004085798	0.9142478	0.3183912	SKCM-US	gender	0.02034059	ICGC	C6	LRP1B	protein_coding	protein_coding	coding:coding
0.01840624	0.719997	0.3054274	SKCM-US	gender	0.04234115	ICGC	FMN2	MGAM	protein_coding	protein_coding	coding:coding
0.004085798	0.9142478	0.3183912	SKCM-US	gender	0.02034059	ICGC	OBSCN	MROH2B	protein_coding	protein_coding	coding:coding
0.001807588	1.018101	0.3262986	SKCM-US	gender	0.01532973	ICGC	LRP2	MROH2B	protein_coding	protein_coding	coding:coding
0.001807588	1.018101	0.3262986	SKCM-US	gender	0.01532973	ICGC	MUC17	MROH2B	protein_coding	protein_coding	coding:coding
0.01840624	0.719997	0.3054274	SKCM-US	gender	0.04234115	ICGC	GRID2	MUC16	protein_coding	protein_coding	coding:coding
0.000135932	1.367421	0.3583899	SKCM-US	gender	0.01092143	ICGC	MYO3A	MUC16	protein_coding	protein_coding	coding:coding
0.01840624	0.719997	0.3054274	SKCM-US	gender	0.04234115	ICGC	CDH6	MUC16	protein_coding	protein_coding	coding:coding
0.001807588	1.018101	0.3262986	SKCM-US	gender	0.01532973	ICGC	FAT3	NEB	protein_coding	protein_coding	coding:coding
0.004085798	0.9142478	0.3183912	SKCM-US	gender	0.02034059	ICGC	FAM135B	NEB	protein_coding	protein_coding	coding:coding
0.008875062	0.8151056	0.3114859	SKCM-US	gender	0.0292264	ICGC	SPHKAP	NEB	protein_coding	protein_coding	coding:coding
0.01840624	0.719997	0.3054274	SKCM-US	gender	0.04234115	ICGC	SYNE1	OR51B5	protein_coding	protein_coding	coding:coding
0.01840624	0.719997	0.3054274	SKCM-US	gender	0.04234115	ICGC	APOB	OR51B5	protein_coding	protein_coding	coding:coding
0.008875062	0.8151056	0.3114859	SKCM-US	gender	0.0292264	ICGC	MXRA5	PCDH15	protein_coding	protein_coding	coding:coding
0.004085798	0.9142478	0.3183912	SKCM-US	gender	0.02034059	ICGC	HYDIN	PCDHA2	protein_coding	protein_coding	coding:coding
0.008875062	0.8151056	0.3114859	SKCM-US	gender	0.0292264	ICGC	NEB	PCDHA2	protein_coding	protein_coding	coding:coding
0.001807588	1.018101	0.3262986	SKCM-US	gender	0.01532973	ICGC	CACNA1E	PCDHA9	protein_coding	protein_coding	coding:coding
0.0003255905	1.243491	0.345987	SKCM-US	gender	0.01111244	ICGC	DNAH11	PCDHA9	protein_coding	protein_coding	coding:coding
0.008875062	0.8151056	0.3114859	SKCM-US	gender	0.0292264	ICGC	TENM3	PCDHGB1	protein_coding	protein_coding	coding:coding
0.01840624	0.719997	0.3054274	SKCM-US	gender	0.04234115	ICGC	DOCK3	PCLO	protein_coding	protein_coding	coding:coding
0.01840624	0.719997	0.3054274	SKCM-US	gender	0.04234115	ICGC	DNAH5	PCNX2	protein_coding	protein_coding	coding:coding
0.0007750206	1.127499	0.3354089	SKCM-US	gender	0.01246551	ICGC	COL22A1	PKHD1L1	protein_coding	protein_coding	coding:coding
0.008875062	0.8151056	0.3114859	SKCM-US	gender	0.0292264	ICGC	ADAMTS18	PKHD1L1	protein_coding	protein_coding	coding:coding
0.008875062	0.8151056	0.3114859	SKCM-US	gender	0.0292264	ICGC	UNC79	PKHD1L1	protein_coding	protein_coding	coding:coding
0.004085798	0.9142478	0.3183912	SKCM-US	gender	0.02034059	ICGC	DNAH2	PKHD1L1	protein_coding	protein_coding	coding:coding
0.008875062	0.8151056	0.3114859	SKCM-US	gender	0.0292264	ICGC	COL4A5	PKHD1L1	protein_coding	protein_coding	coding:coding
0.0003255905	1.243491	0.345987	SKCM-US	gender	0.01111244	ICGC	PRUNE2	PKHD1L1	protein_coding	protein_coding	coding:coding
0.008875062	0.8151056	0.3114859	SKCM-US	gender	0.0292264	ICGC	DNAH5	PTPRD	protein_coding	protein_coding	coding:coding
0.001807588	1.018101	0.3262986	SKCM-US	gender	0.01532973	ICGC	COL4A4	PTPRT	protein_coding	protein_coding	coding:coding
0.008875062	0.8151056	0.3114859	SKCM-US	gender	0.0292264	ICGC	C6	RP1	protein_coding	protein_coding	coding:coding
0.0007750206	1.127499	0.3354089	SKCM-US	gender	0.01246551	ICGC	SI	RP1	protein_coding	protein_coding	coding:coding
0.001807588	1.018101	0.3262986	SKCM-US	gender	0.01532973	ICGC	DNAH5	RP1L1	protein_coding	protein_coding	coding:coding
0.000135932	1.367421	0.3583899	SKCM-US	gender	0.01092143	ICGC	MXRA5	RYR1	protein_coding	protein_coding	coding:coding
0.001807588	1.018101	0.3262986	SKCM-US	gender	0.01532973	ICGC	LRP2	RYR1	protein_coding	protein_coding	coding:coding
0.01840624	0.719997	0.3054274	SKCM-US	gender	0.04234115	ICGC	SCN5A	RYR1	protein_coding	protein_coding	coding:coding
0.000135932	1.367421	0.3583899	SKCM-US	gender	0.01092143	ICGC	RYR1	RYR2	protein_coding	protein_coding	coding:coding
0.008875062	0.8151056	0.3114859	SKCM-US	gender	0.0292264	ICGC	DNAH5	SALL1	protein_coding	protein_coding	coding:coding
0.008875062	0.8151056	0.3114859	SKCM-US	gender	0.0292264	ICGC	DNAH9	SCN11A	protein_coding	protein_coding	coding:coding
0.004085798	0.9142478	0.3183912	SKCM-US	gender	0.02034059	ICGC	HYDIN	SCN11A	protein_coding	protein_coding	coding:coding
0.004085798	0.9142478	0.3183912	SKCM-US	gender	0.02034059	ICGC	FAT3	SCN11A	protein_coding	protein_coding	coding:coding
0.01840624	0.719997	0.3054274	SKCM-US	gender	0.04234115	ICGC	CSMD2	SORCS3	protein_coding	protein_coding	coding:coding
0.0003255905	1.243491	0.345987	SKCM-US	gender	0.01111244	ICGC	FAM135B	SPHKAP	protein_coding	protein_coding	coding:coding
0.004085798	0.9142478	0.3183912	SKCM-US	gender	0.02034059	ICGC	MXRA5	STXBP5L	protein_coding	protein_coding	coding:coding
0.0007750206	1.127499	0.3354089	SKCM-US	gender	0.01246551	ICGC	THSD7B	STXBP5L	protein_coding	protein_coding	coding:coding
0.008875062	0.8151056	0.3114859	SKCM-US	gender	0.0292264	ICGC	USH2A	SVEP1	protein_coding	protein_coding	coding:coding
0.0003255905	1.243491	0.345987	SKCM-US	gender	0.01111244	ICGC	RP1	TACC2	protein_coding	protein_coding	coding:coding
0.008875062	0.8151056	0.3114859	SKCM-US	gender	0.0292264	ICGC	DNAH5	TNR	protein_coding	protein_coding	coding:coding
0.01840624	0.719997	0.3054274	SKCM-US	gender	0.04234115	ICGC	DNAH7	TNXB	protein_coding	protein_coding	coding:coding
0.01840624	0.719997	0.3054274	SKCM-US	gender	0.04234115	ICGC	DNAH8	TNXB	protein_coding	protein_coding	coding:coding
0.004085798	0.9142478	0.3183912	SKCM-US	gender	0.02034059	ICGC	HYDIN	TNXB	protein_coding	protein_coding	coding:coding
0.01840624	0.719997	0.3054274	SKCM-US	gender	0.04234115	ICGC	TP63	TTN	protein_coding	protein_coding	coding:coding
0.01840624	0.719997	0.3054274	SKCM-US	gender	0.04234115	ICGC	TLL1	TTN	protein_coding	protein_coding	coding:coding
0.0003255905	1.243491	0.345987	SKCM-US	gender	0.01111244	ICGC	TRIM5	TTN	protein_coding	protein_coding	coding:coding
0.001807588	1.018101	0.3262986	SKCM-US	gender	0.01532973	ICGC	COL12A1	TTN	protein_coding	protein_coding	coding:coding
0.004085798	0.9142478	0.3183912	SKCM-US	gender	0.02034059	ICGC	ROBO2	TTN-AS1	protein_coding	none protein_coding	coding:non-coding
0.01840624	0.719997	0.3054274	SKCM-US	gender	0.04234115	ICGC	ABCA4	TTN-AS1	protein_coding	none protein_coding	coding:non-coding
0.01840624	0.719997	0.3054274	SKCM-US	gender	0.04234115	ICGC	TRPC4	TTN-AS1	protein_coding	none protein_coding	coding:non-coding
0.004085798	0.9142478	0.3183912	SKCM-US	gender	0.02034059	ICGC	RP1	UNC79	protein_coding	protein_coding	coding:coding
0.004085798	0.9142478	0.3183912	SKCM-US	gender	0.02034059	ICGC	SI	XIRP2	protein_coding	protein_coding	coding:coding
0.01840624	0.719997	0.3054274	SKCM-US	gender	0.04234115	ICGC	APOB	ZAN	protein_coding	protein_coding	coding:coding
0.02313127	0.6952197	0.3060943	SKCM-US	gender	0.04849868	ICGC	ZFHX4	AC005323.2	protein_coding	none protein_coding	coding:non-coding
0.02313127	0.6952197	0.3060943	SKCM-US	gender	0.04849868	ICGC	PCDHA2	AC005323.2	protein_coding	none protein_coding	coding:non-coding
0.01129395	0.7907275	0.3121125	SKCM-US	gender	0.03298432	ICGC	LILRB1	ADGRV1	protein_coding	protein_coding	coding:coding
0.0004269034	1.220553	0.3464656	SKCM-US	gender	0.01156321	ICGC	ADAMTS18	ADGRV1	protein_coding	protein_coding	coding:coding
0.01129395	0.7907275	0.3121125	SKCM-US	gender	0.03298432	ICGC	PTPRD	ADGRV1	protein_coding	protein_coding	coding:coding
0.02313127	0.6952197	0.3060943	SKCM-US	gender	0.04849868	ICGC	STAB2	ADGRV1	protein_coding	protein_coding	coding:coding
0.00234539	0.994472	0.3268487	SKCM-US	gender	0.01672451	ICGC	DNAH8	AHNAK2	protein_coding	protein_coding	coding:coding
0.02313127	0.6952197	0.3060943	SKCM-US	gender	0.04849868	ICGC	UNC79	ANK3	protein_coding	protein_coding	coding:coding
0.005255452	0.8902523	0.3189789	SKCM-US	gender	0.02263827	ICGC	CSMD2	ANKRD30A	protein_coding	protein_coding	coding:coding
0.005255452	0.8902523	0.3189789	SKCM-US	gender	0.02263827	ICGC	RP1	ANKRD30A	protein_coding	protein_coding	coding:coding
0.005255452	0.8902523	0.3189789	SKCM-US	gender	0.02263827	ICGC	SPHKAP	CACNA1E	protein_coding	protein_coding	coding:coding
0.02313127	0.6952197	0.3060943	SKCM-US	gender	0.04849868	ICGC	DNAH7	CD163L1	protein_coding	protein_coding	coding:coding
0.01129395	0.7907275	0.3121125	SKCM-US	gender	0.03298432	ICGC	ZFHX4	CNTNAP2	protein_coding	protein_coding	coding:coding
0.02313127	0.6952197	0.3060943	SKCM-US	gender	0.04849868	ICGC	DNAH8	COL3A1	protein_coding	protein_coding	coding:coding
0.005255452	0.8902523	0.3189789	SKCM-US	gender	0.02263827	ICGC	ADAMTS18	CSMD1	protein_coding	protein_coding	coding:coding
0.01129395	0.7907275	0.3121125	SKCM-US	gender	0.03298432	ICGC	ADAMTS20	CSMD1	protein_coding	protein_coding	coding:coding
0.00234539	0.994472	0.3268487	SKCM-US	gender	0.01672451	ICGC	MECOM	CSMD1	protein_coding	protein_coding	coding:coding
0.01129395	0.7907275	0.3121125	SKCM-US	gender	0.03298432	ICGC	PCDHB7	CSMD1	protein_coding	protein_coding	coding:coding
0.001012134	1.104222	0.3359228	SKCM-US	gender	0.0131964	ICGC	CD163	CSMD1	protein_coding	protein_coding	coding:coding
0.02313127	0.6952197	0.3060943	SKCM-US	gender	0.04849868	ICGC	PRUNE2	CSMD3	protein_coding	protein_coding	coding:coding
0.00234539	0.994472	0.3268487	SKCM-US	gender	0.01672451	ICGC	MUC17	DMBT1	protein_coding	protein_coding	coding:coding
0.01129395	0.7907275	0.3121125	SKCM-US	gender	0.03298432	ICGC	RP1	DNAH11	protein_coding	protein_coding	coding:coding
0.001012134	1.104222	0.3359228	SKCM-US	gender	0.0131964	ICGC	CSMD1	DNAH17	protein_coding	protein_coding	coding:coding
0.02313127	0.6952197	0.3060943	SKCM-US	gender	0.04849868	ICGC	ADGRV1	DNAH17	protein_coding	protein_coding	coding:coding
0.02313127	0.6952197	0.3060943	SKCM-US	gender	0.04849868	ICGC	BCLAF1	DNAH5	protein_coding	protein_coding	coding:coding
0.02313127	0.6952197	0.3060943	SKCM-US	gender	0.04849868	ICGC	PRUNE2	DNAH7	protein_coding	protein_coding	coding:coding
0.005255452	0.8902523	0.3189789	SKCM-US	gender	0.02263827	ICGC	SI	DNAH7	protein_coding	protein_coding	coding:coding
0.001012134	1.104222	0.3359228	SKCM-US	gender	0.0131964	ICGC	SI	DNAH8	protein_coding	protein_coding	coding:coding
0.02313127	0.6952197	0.3060943	SKCM-US	gender	0.04849868	ICGC	CSMD2	DSG1-AS1	protein_coding	none protein_coding	coding:non-coding
0.0001784537	1.344807	0.358834	SKCM-US	gender	0.01092143	ICGC	LRP1B	ERICH3	protein_coding	protein_coding	coding:coding
0.001012134	1.104222	0.3359228	SKCM-US	gender	0.0131964	ICGC	SI	FAT3	protein_coding	protein_coding	coding:coding
0.00234539	0.994472	0.3268487	SKCM-US	gender	0.01672451	ICGC	STXBP5L	FAT3	protein_coding	protein_coding	coding:coding
0.02313127	0.6952197	0.3060943	SKCM-US	gender	0.04849868	ICGC	SCN11A	FAT4	protein_coding	protein_coding	coding:coding
0.005255452	0.8902523	0.3189789	SKCM-US	gender	0.02263827	ICGC	TACC2	FLG-AS1	protein_coding	none protein_coding	coding:non-coding
0.02313127	0.6952197	0.3060943	SKCM-US	gender	0.04849868	ICGC	RYR3	FLG-AS1	protein_coding	none protein_coding	coding:non-coding
0.001012134	1.104222	0.3359228	SKCM-US	gender	0.0131964	ICGC	ADAM18	FLG-AS1	protein_coding	none protein_coding	coding:non-coding
7.528321e-05	1.478751	0.3735221	SKCM-US	gender	0.01092143	ICGC	PCDHB7	FLG-AS1	protein_coding	none protein_coding	coding:non-coding
0.01129395	0.7907275	0.3121125	SKCM-US	gender	0.03298432	ICGC	ACAN	FLG-AS1	protein_coding	none protein_coding	coding:non-coding
0.01129395	0.7907275	0.3121125	SKCM-US	gender	0.03298432	ICGC	MYH2	FLG-AS1	protein_coding	none protein_coding	coding:non-coding
0.02313127	0.6952197	0.3060943	SKCM-US	gender	0.04849868	ICGC	DNAH7	FMN2	protein_coding	protein_coding	coding:coding
0.00234539	0.994472	0.3268487	SKCM-US	gender	0.01672451	ICGC	DNAH5	FREM1	protein_coding	protein_coding	coding:coding
0.005255452	0.8902523	0.3189789	SKCM-US	gender	0.02263827	ICGC	ADGRV1	FREM1	protein_coding	protein_coding	coding:coding
0.001012134	1.104222	0.3359228	SKCM-US	gender	0.0131964	ICGC	DNAH5	FREM2	protein_coding	protein_coding	coding:coding
0.02313127	0.6952197	0.3060943	SKCM-US	gender	0.04849868	ICGC	CSMD3	GRIN2A	protein_coding	protein_coding	coding:coding
0.02313127	0.6952197	0.3060943	SKCM-US	gender	0.04849868	ICGC	USH2A	GRIN2A	protein_coding	protein_coding	coding:coding
0.0001784537	1.344807	0.358834	SKCM-US	gender	0.01092143	ICGC	UNC79	HYDIN	protein_coding	protein_coding	coding:coding
0.0004269034	1.220553	0.3464656	SKCM-US	gender	0.01156321	ICGC	ACAN	LRP1B	protein_coding	protein_coding	coding:coding
0.02313127	0.6952197	0.3060943	SKCM-US	gender	0.04849868	ICGC	PLCE1	LRP1B	protein_coding	protein_coding	coding:coding
0.01129395	0.7907275	0.3121125	SKCM-US	gender	0.03298432	ICGC	STAB2	LRP1B	protein_coding	protein_coding	coding:coding
0.02313127	0.6952197	0.3060943	SKCM-US	gender	0.04849868	ICGC	PRUNE2	LRP1B	protein_coding	protein_coding	coding:coding
0.0004269034	1.220553	0.3464656	SKCM-US	gender	0.01156321	ICGC	CRB1	LRP1B	protein_coding	protein_coding	coding:coding
0.00234539	0.994472	0.3268487	SKCM-US	gender	0.01672451	ICGC	MYO18B	MGAM	protein_coding	protein_coding	coding:coding
0.005255452	0.8902523	0.3189789	SKCM-US	gender	0.02263827	ICGC	APOB	MMP26	protein_coding	protein_coding	coding:coding
0.02313127	0.6952197	0.3060943	SKCM-US	gender	0.04849868	ICGC	PLEC	MUC16	protein_coding	protein_coding	coding:coding
0.005255452	0.8902523	0.3189789	SKCM-US	gender	0.02263827	ICGC	PCDH15	MUC17	protein_coding	protein_coding	coding:coding
0.005255452	0.8902523	0.3189789	SKCM-US	gender	0.02263827	ICGC	TNXB	MUC17	protein_coding	protein_coding	coding:coding
0.01129395	0.7907275	0.3121125	SKCM-US	gender	0.03298432	ICGC	DNAH5	MYOCD	protein_coding	protein_coding	coding:coding
0.001012134	1.104222	0.3359228	SKCM-US	gender	0.0131964	ICGC	LRP1B	NBEA	protein_coding	protein_coding	coding:coding
0.02313127	0.6952197	0.3060943	SKCM-US	gender	0.04849868	ICGC	ADGRV1	NBEA	protein_coding	protein_coding	coding:coding
0.005255452	0.8902523	0.3189789	SKCM-US	gender	0.02263827	ICGC	ADGRV1	NLRP5	protein_coding	protein_coding	coding:coding
0.01129395	0.7907275	0.3121125	SKCM-US	gender	0.03298432	ICGC	THSD7B	NPAP1	protein_coding	protein_coding	coding:coding
0.0004269034	1.220553	0.3464656	SKCM-US	gender	0.01156321	ICGC	ZNF831	OBSCN	protein_coding	protein_coding	coding:coding
0.0001784537	1.344807	0.358834	SKCM-US	gender	0.01092143	ICGC	MYO18B	OBSCN	protein_coding	protein_coding	coding:coding
0.02313127	0.6952197	0.3060943	SKCM-US	gender	0.04849868	ICGC	PAPPA2	OR51B5	protein_coding	protein_coding	coding:coding
0.005255452	0.8902523	0.3189789	SKCM-US	gender	0.02263827	ICGC	SPHKAP	OR51B5	protein_coding	protein_coding	coding:coding
0.00234539	0.994472	0.3268487	SKCM-US	gender	0.01672451	ICGC	FAM135B	PCDH15	protein_coding	protein_coding	coding:coding
0.02313127	0.6952197	0.3060943	SKCM-US	gender	0.04849868	ICGC	CSMD2	PCDH18	protein_coding	protein_coding	coding:coding
0.00234539	0.994472	0.3268487	SKCM-US	gender	0.01672451	ICGC	MUC17	PCDHA2	protein_coding	protein_coding	coding:coding
0.005255452	0.8902523	0.3189789	SKCM-US	gender	0.02263827	ICGC	USH2A	PCDHA2	protein_coding	protein_coding	coding:coding
0.0001784537	1.344807	0.358834	SKCM-US	gender	0.01092143	ICGC	STXBP5L	PCDHA9	protein_coding	protein_coding	coding:coding
0.0004269034	1.220553	0.3464656	SKCM-US	gender	0.01156321	ICGC	DMBT1	PCDHA9	protein_coding	protein_coding	coding:coding
0.001012134	1.104222	0.3359228	SKCM-US	gender	0.0131964	ICGC	FREM1	PCLO	protein_coding	protein_coding	coding:coding
0.00234539	0.994472	0.3268487	SKCM-US	gender	0.01672451	ICGC	PLCE1	PCLO	protein_coding	protein_coding	coding:coding
0.005255452	0.8902523	0.3189789	SKCM-US	gender	0.02263827	ICGC	TNR	PCLO	protein_coding	protein_coding	coding:coding
0.001012134	1.104222	0.3359228	SKCM-US	gender	0.0131964	ICGC	MECOM	PKHD1L1	protein_coding	protein_coding	coding:coding
0.005255452	0.8902523	0.3189789	SKCM-US	gender	0.02263827	ICGC	RELN	PKHD1L1	protein_coding	protein_coding	coding:coding
0.00234539	0.994472	0.3268487	SKCM-US	gender	0.01672451	ICGC	ZNF804A	PKHD1L1	protein_coding	protein_coding	coding:coding
0.005255452	0.8902523	0.3189789	SKCM-US	gender	0.02263827	ICGC	CMYA5	PKHD1L1	protein_coding	protein_coding	coding:coding
0.01129395	0.7907275	0.3121125	SKCM-US	gender	0.03298432	ICGC	NOS1	PKHD1L1	protein_coding	protein_coding	coding:coding
0.001012134	1.104222	0.3359228	SKCM-US	gender	0.0131964	ICGC	C6	PKHD1L1	protein_coding	protein_coding	coding:coding
0.001012134	1.104222	0.3359228	SKCM-US	gender	0.0131964	ICGC	ANK3	PTPRD	protein_coding	protein_coding	coding:coding
0.005255452	0.8902523	0.3189789	SKCM-US	gender	0.02263827	ICGC	MUC16	ROBO2	protein_coding	protein_coding	coding:coding
0.01129395	0.7907275	0.3121125	SKCM-US	gender	0.03298432	ICGC	PCDH15	RYR2	protein_coding	protein_coding	coding:coding
0.02313127	0.6952197	0.3060943	SKCM-US	gender	0.04849868	ICGC	SPTA1	RYR2	protein_coding	protein_coding	coding:coding
0.005255452	0.8902523	0.3189789	SKCM-US	gender	0.02263827	ICGC	NEB	RYR2	protein_coding	protein_coding	coding:coding
0.02313127	0.6952197	0.3060943	SKCM-US	gender	0.04849868	ICGC	THSD7B	RYR2	protein_coding	protein_coding	coding:coding
0.02313127	0.6952197	0.3060943	SKCM-US	gender	0.04849868	ICGC	CSMD3	SCN10A	protein_coding	protein_coding	coding:coding
0.005255452	0.8902523	0.3189789	SKCM-US	gender	0.02263827	ICGC	PCDH15	SPHKAP	protein_coding	protein_coding	coding:coding
0.005255452	0.8902523	0.3189789	SKCM-US	gender	0.02263827	ICGC	DNAH11	SPTA1	protein_coding	protein_coding	coding:coding
0.005255452	0.8902523	0.3189789	SKCM-US	gender	0.02263827	ICGC	OBSCN	SVEP1	protein_coding	protein_coding	coding:coding
0.02313127	0.6952197	0.3060943	SKCM-US	gender	0.04849868	ICGC	ZFHX4	TACC2	protein_coding	protein_coding	coding:coding
0.005255452	0.8902523	0.3189789	SKCM-US	gender	0.02263827	ICGC	SYNE1	TENM3	protein_coding	protein_coding	coding:coding
0.0004269034	1.220553	0.3464656	SKCM-US	gender	0.01156321	ICGC	THSD7B	TENM3	protein_coding	protein_coding	coding:coding
0.001012134	1.104222	0.3359228	SKCM-US	gender	0.0131964	ICGC	ASXL3	THSD7B	protein_coding	protein_coding	coding:coding
0.02313127	0.6952197	0.3060943	SKCM-US	gender	0.04849868	ICGC	SPTA1	TNXB	protein_coding	protein_coding	coding:coding
0.00234539	0.994472	0.3268487	SKCM-US	gender	0.01672451	ICGC	ASTN1	TTN	protein_coding	protein_coding	coding:coding
0.01129395	0.7907275	0.3121125	SKCM-US	gender	0.03298432	ICGC	VWF	TTN	protein_coding	protein_coding	coding:coding
0.00234539	0.994472	0.3268487	SKCM-US	gender	0.01672451	ICGC	FAT2	TTN	protein_coding	protein_coding	coding:coding
0.005255452	0.8902523	0.3189789	SKCM-US	gender	0.02263827	ICGC	IGSF1	TTN	protein_coding	protein_coding	coding:coding
0.02313127	0.6952197	0.3060943	SKCM-US	gender	0.04849868	ICGC	CACNA1G	TTN-AS1	protein_coding	none protein_coding	coding:non-coding
0.01129395	0.7907275	0.3121125	SKCM-US	gender	0.03298432	ICGC	COL1A1	TTN-AS1	protein_coding	none protein_coding	coding:non-coding
0.02313127	0.6952197	0.3060943	SKCM-US	gender	0.04849868	ICGC	HSPG2	TTN-AS1	protein_coding	none protein_coding	coding:non-coding
0.00234539	0.994472	0.3268487	SKCM-US	gender	0.01672451	ICGC	SH3RF2	TTN-AS1	protein_coding	none protein_coding	coding:non-coding
0.01129395	0.7907275	0.3121125	SKCM-US	gender	0.03298432	ICGC	ZFHX4	UNC13C	protein_coding	protein_coding	coding:coding
0.005255452	0.8902523	0.3189789	SKCM-US	gender	0.02263827	ICGC	DNAH7	UNC79	protein_coding	protein_coding	coding:coding
0.005255452	0.8902523	0.3189789	SKCM-US	gender	0.02263827	ICGC	CSMD2	ZDBF2	protein_coding	protein_coding	coding:coding
0.01432684	0.7659502	0.3127652	SKCM-US	gender	0.03730266	ICGC	GRIN2A	AC005323.2	protein_coding	none protein_coding	coding:non-coding
0.00674209	0.8658742	0.3195908	SKCM-US	gender	0.025351	ICGC	CSMD3	ADAMTS20	protein_coding	protein_coding	coding:coding
0.0002340972	1.321869	0.3592955	SKCM-US	gender	0.01092143	ICGC	MYH2	ADGRV1	protein_coding	protein_coding	coding:coding
0.01432684	0.7659502	0.3127652	SKCM-US	gender	0.03730266	ICGC	SNCAIP	ADGRV1	protein_coding	protein_coding	coding:coding
0.00674209	0.8658742	0.3195908	SKCM-US	gender	0.025351	ICGC	TNR	ADGRV1	protein_coding	protein_coding	coding:coding
0.0002340972	1.321869	0.3592955	SKCM-US	gender	0.01092143	ICGC	HYDIN	AHNAK2	protein_coding	protein_coding	coding:coding
0.00674209	0.8658742	0.3195908	SKCM-US	gender	0.025351	ICGC	PCDHB7	ANK3	protein_coding	protein_coding	coding:coding
0.00674209	0.8658742	0.3195908	SKCM-US	gender	0.025351	ICGC	CRB1	ANK3	protein_coding	protein_coding	coding:coding
0.003036684	0.9704765	0.3274212	SKCM-US	gender	0.018097	ICGC	C6	ANK3	protein_coding	protein_coding	coding:coding
0.000559071	1.197276	0.3469631	SKCM-US	gender	0.01168747	ICGC	CSMD2	BSN	protein_coding	protein_coding	coding:coding
0.003036684	0.9704765	0.3274212	SKCM-US	gender	0.018097	ICGC	MUC17	CACNA1E	protein_coding	protein_coding	coding:coding
0.01432684	0.7659502	0.3127652	SKCM-US	gender	0.03730266	ICGC	DNAH5	CACNA2D3	protein_coding	protein_coding	coding:coding
0.00674209	0.8658742	0.3195908	SKCM-US	gender	0.025351	ICGC	PCLO	CFAP54	protein_coding	protein_coding	coding:coding
0.01432684	0.7659502	0.3127652	SKCM-US	gender	0.03730266	ICGC	DNAH5	COL14A1	protein_coding	protein_coding	coding:coding
0.01432684	0.7659502	0.3127652	SKCM-US	gender	0.03730266	ICGC	ADGRV1	COL22A1	protein_coding	protein_coding	coding:coding
0.01432684	0.7659502	0.3127652	SKCM-US	gender	0.03730266	ICGC	TTN	COL6A6	protein_coding	protein_coding	coding:coding
0.01432684	0.7659502	0.3127652	SKCM-US	gender	0.03730266	ICGC	STAB2	CSMD1	protein_coding	protein_coding	coding:coding
0.0013196	1.080594	0.3364572	SKCM-US	gender	0.01378686	ICGC	MYO18B	CSMD1	protein_coding	protein_coding	coding:coding
0.0013196	1.080594	0.3364572	SKCM-US	gender	0.01378686	ICGC	PCDH15	DNAH10	protein_coding	protein_coding	coding:coding
0.01432684	0.7659502	0.3127652	SKCM-US	gender	0.03730266	ICGC	OBSCN	DNAH10	protein_coding	protein_coding	coding:coding
0.00674209	0.8658742	0.3195908	SKCM-US	gender	0.025351	ICGC	MXRA5	DNAH11	protein_coding	protein_coding	coding:coding
0.00674209	0.8658742	0.3195908	SKCM-US	gender	0.025351	ICGC	PCLO	DPYD	protein_coding	protein_coding	coding:coding
0.00674209	0.8658742	0.3195908	SKCM-US	gender	0.025351	ICGC	DNAH5	DSC3	protein_coding	protein_coding	coding:coding
0.000559071	1.197276	0.3469631	SKCM-US	gender	0.01168747	ICGC	TTN	ERBB4	protein_coding	protein_coding	coding:coding
0.0013196	1.080594	0.3364572	SKCM-US	gender	0.01378686	ICGC	ADGRV1	ERC2	protein_coding	protein_coding	coding:coding
0.0013196	1.080594	0.3364572	SKCM-US	gender	0.01378686	ICGC	LRP2	FAM135B	protein_coding	protein_coding	coding:coding
0.01432684	0.7659502	0.3127652	SKCM-US	gender	0.03730266	ICGC	BSN	FAT4	protein_coding	protein_coding	coding:coding
0.003036684	0.9704765	0.3274212	SKCM-US	gender	0.018097	ICGC	COL3A1	FAT4	protein_coding	protein_coding	coding:coding
0.01432684	0.7659502	0.3127652	SKCM-US	gender	0.03730266	ICGC	AHNAK2	FAT4	protein_coding	protein_coding	coding:coding
0.0013196	1.080594	0.3364572	SKCM-US	gender	0.01378686	ICGC	SORCS3	FAT4	protein_coding	protein_coding	coding:coding
0.003036684	0.9704765	0.3274212	SKCM-US	gender	0.018097	ICGC	COL4A5	FLG-AS1	protein_coding	none protein_coding	coding:non-coding
0.01432684	0.7659502	0.3127652	SKCM-US	gender	0.03730266	ICGC	ABCA13	FLG-AS1	protein_coding	none protein_coding	coding:non-coding
0.00674209	0.8658742	0.3195908	SKCM-US	gender	0.025351	ICGC	SPTA1	GRIN2A	protein_coding	protein_coding	coding:coding
0.01432684	0.7659502	0.3127652	SKCM-US	gender	0.03730266	ICGC	TTN	JCAD	protein_coding	protein_coding	coding:coding
0.003036684	0.9704765	0.3274212	SKCM-US	gender	0.018097	ICGC	MUC16	KEL	protein_coding	protein_coding	coding:coding
0.000559071	1.197276	0.3469631	SKCM-US	gender	0.01168747	ICGC	ANKRD30A	LRP1B	protein_coding	protein_coding	coding:coding
0.0013196	1.080594	0.3364572	SKCM-US	gender	0.01378686	ICGC	FMN2	LRP1B	protein_coding	protein_coding	coding:coding
0.0013196	1.080594	0.3364572	SKCM-US	gender	0.01378686	ICGC	SLIT2	LRP1B	protein_coding	protein_coding	coding:coding
0.003036684	0.9704765	0.3274212	SKCM-US	gender	0.018097	ICGC	COL21A1	LRP1B	protein_coding	protein_coding	coding:coding
0.01432684	0.7659502	0.3127652	SKCM-US	gender	0.03730266	ICGC	CD163L1	MGAM	protein_coding	protein_coding	coding:coding
0.0013196	1.080594	0.3364572	SKCM-US	gender	0.01378686	ICGC	SI	MGAM	protein_coding	protein_coding	coding:coding
0.0013196	1.080594	0.3364572	SKCM-US	gender	0.01378686	ICGC	CRB1	MGAM	protein_coding	protein_coding	coding:coding
0.00674209	0.8658742	0.3195908	SKCM-US	gender	0.025351	ICGC	ACAN	MGAM	protein_coding	protein_coding	coding:coding
0.01432684	0.7659502	0.3127652	SKCM-US	gender	0.03730266	ICGC	MXRA5	MMP26	protein_coding	protein_coding	coding:coding
0.01432684	0.7659502	0.3127652	SKCM-US	gender	0.03730266	ICGC	SPTA1	MROH2B	protein_coding	protein_coding	coding:coding
0.01432684	0.7659502	0.3127652	SKCM-US	gender	0.03730266	ICGC	FAT3	MROH2B	protein_coding	protein_coding	coding:coding
0.0013196	1.080594	0.3364572	SKCM-US	gender	0.01378686	ICGC	FAM135B	MROH2B	protein_coding	protein_coding	coding:coding
0.003036684	0.9704765	0.3274212	SKCM-US	gender	0.018097	ICGC	DSCAML1	MUC16	protein_coding	protein_coding	coding:coding
0.000559071	1.197276	0.3469631	SKCM-US	gender	0.01168747	ICGC	AKAP6	MUC16	protein_coding	protein_coding	coding:coding
0.003036684	0.9704765	0.3274212	SKCM-US	gender	0.018097	ICGC	MYCBP2	MUC16	protein_coding	protein_coding	coding:coding
0.003036684	0.9704765	0.3274212	SKCM-US	gender	0.018097	ICGC	HSPG2	MUC16	protein_coding	protein_coding	coding:coding
0.003036684	0.9704765	0.3274212	SKCM-US	gender	0.018097	ICGC	HECW1	MUC16	protein_coding	protein_coding	coding:coding
0.0013196	1.080594	0.3364572	SKCM-US	gender	0.01378686	ICGC	TEX15	MUC16	protein_coding	protein_coding	coding:coding
0.0013196	1.080594	0.3364572	SKCM-US	gender	0.01378686	ICGC	DNAH11	MUC17	protein_coding	protein_coding	coding:coding
0.003036684	0.9704765	0.3274212	SKCM-US	gender	0.018097	ICGC	OR51B5	MUC17	protein_coding	protein_coding	coding:coding
0.003036684	0.9704765	0.3274212	SKCM-US	gender	0.018097	ICGC	C6	MXRA5	protein_coding	protein_coding	coding:coding
0.00674209	0.8658742	0.3195908	SKCM-US	gender	0.025351	ICGC	ASXL3	NEB	protein_coding	protein_coding	coding:coding
0.01432684	0.7659502	0.3127652	SKCM-US	gender	0.03730266	ICGC	DNAH5	NLRP5	protein_coding	protein_coding	coding:coding
0.0013196	1.080594	0.3364572	SKCM-US	gender	0.01378686	ICGC	DNAH7	NPAP1	protein_coding	protein_coding	coding:coding
0.00674209	0.8658742	0.3195908	SKCM-US	gender	0.025351	ICGC	CSMD3	NPAP1	protein_coding	protein_coding	coding:coding
0.00674209	0.8658742	0.3195908	SKCM-US	gender	0.025351	ICGC	CSMD2	NPAP1	protein_coding	protein_coding	coding:coding
0.000559071	1.197276	0.3469631	SKCM-US	gender	0.01168747	ICGC	FAM135B	OR51B5	protein_coding	protein_coding	coding:coding
0.003036684	0.9704765	0.3274212	SKCM-US	gender	0.018097	ICGC	OBSCN	PCDHA2	protein_coding	protein_coding	coding:coding
0.00674209	0.8658742	0.3195908	SKCM-US	gender	0.025351	ICGC	CNTNAP2	PCDHA2	protein_coding	protein_coding	coding:coding
0.000559071	1.197276	0.3469631	SKCM-US	gender	0.01168747	ICGC	CRB1	PCDHA9	protein_coding	protein_coding	coding:coding
0.0002340972	1.321869	0.3592955	SKCM-US	gender	0.01092143	ICGC	SI	PCDHA9	protein_coding	protein_coding	coding:coding
0.0002340972	1.321869	0.3592955	SKCM-US	gender	0.01092143	ICGC	ZNF831	PCDHGB1	protein_coding	protein_coding	coding:coding
0.01432684	0.7659502	0.3127652	SKCM-US	gender	0.03730266	ICGC	PTPRB	PCLO	protein_coding	protein_coding	coding:coding
0.00674209	0.8658742	0.3195908	SKCM-US	gender	0.025351	ICGC	SALL1	PCLO	protein_coding	protein_coding	coding:coding
0.0013196	1.080594	0.3364572	SKCM-US	gender	0.01378686	ICGC	CD163L1	PKHD1L1	protein_coding	protein_coding	coding:coding
0.00674209	0.8658742	0.3195908	SKCM-US	gender	0.025351	ICGC	MED12L	PKHD1L1	protein_coding	protein_coding	coding:coding
0.003036684	0.9704765	0.3274212	SKCM-US	gender	0.018097	ICGC	ARMC4	PKHD1L1	protein_coding	protein_coding	coding:coding
0.00674209	0.8658742	0.3195908	SKCM-US	gender	0.025351	ICGC	DNAH10	PKHD1L1	protein_coding	protein_coding	coding:coding
0.01432684	0.7659502	0.3127652	SKCM-US	gender	0.03730266	ICGC	DNAH5	PLCH1	protein_coding	protein_coding	coding:coding
0.00674209	0.8658742	0.3195908	SKCM-US	gender	0.025351	ICGC	DNAH5	PPP1R3A	protein_coding	protein_coding	coding:coding
0.00674209	0.8658742	0.3195908	SKCM-US	gender	0.025351	ICGC	DNAH7	PTPRD	protein_coding	protein_coding	coding:coding
0.003036684	0.9704765	0.3274212	SKCM-US	gender	0.018097	ICGC	LRP1B	RGPD4	protein_coding	protein_coding	coding:coding
0.00674209	0.8658742	0.3195908	SKCM-US	gender	0.025351	ICGC	SPHKAP	RYR1	protein_coding	protein_coding	coding:coding
0.0002340972	1.321869	0.3592955	SKCM-US	gender	0.01092143	ICGC	ZAN	RYR1	protein_coding	protein_coding	coding:coding
0.003036684	0.9704765	0.3274212	SKCM-US	gender	0.018097	ICGC	TACC2	RYR1	protein_coding	protein_coding	coding:coding
0.01432684	0.7659502	0.3127652	SKCM-US	gender	0.03730266	ICGC	OR51B5	SCN11A	protein_coding	protein_coding	coding:coding
0.00674209	0.8658742	0.3195908	SKCM-US	gender	0.025351	ICGC	PCDH15	SCN11A	protein_coding	protein_coding	coding:coding
0.003036684	0.9704765	0.3274212	SKCM-US	gender	0.018097	ICGC	DNAH7	SORCS3	protein_coding	protein_coding	coding:coding
0.01432684	0.7659502	0.3127652	SKCM-US	gender	0.03730266	ICGC	LRP2	SPHKAP	protein_coding	protein_coding	coding:coding
0.00674209	0.8658742	0.3195908	SKCM-US	gender	0.025351	ICGC	DNAH7	STAB2	protein_coding	protein_coding	coding:coding
0.01432684	0.7659502	0.3127652	SKCM-US	gender	0.03730266	ICGC	DNAH9	TACC2	protein_coding	protein_coding	coding:coding
0.003036684	0.9704765	0.3274212	SKCM-US	gender	0.018097	ICGC	SPTA1	TENM3	protein_coding	protein_coding	coding:coding
0.00674209	0.8658742	0.3195908	SKCM-US	gender	0.025351	ICGC	PCDHB7	THSD7B	protein_coding	protein_coding	coding:coding
0.01432684	0.7659502	0.3127652	SKCM-US	gender	0.03730266	ICGC	THSD7B	TNXB	protein_coding	protein_coding	coding:coding
0.01432684	0.7659502	0.3127652	SKCM-US	gender	0.03730266	ICGC	CACNA1C	TTN	protein_coding	protein_coding	coding:coding
0.000559071	1.197276	0.3469631	SKCM-US	gender	0.01168747	ICGC	CASR	TTN	protein_coding	protein_coding	coding:coding
0.00674209	0.8658742	0.3195908	SKCM-US	gender	0.025351	ICGC	ANO4	TTN	protein_coding	protein_coding	coding:coding
0.00674209	0.8658742	0.3195908	SKCM-US	gender	0.025351	ICGC	ADAM28	TTN-AS1	protein_coding	none protein_coding	coding:non-coding
0.0013196	1.080594	0.3364572	SKCM-US	gender	0.01378686	ICGC	AKAP6	TTN-AS1	protein_coding	none protein_coding	coding:non-coding
0.00674209	0.8658742	0.3195908	SKCM-US	gender	0.025351	ICGC	BRINP1	TTN-AS1	protein_coding	none protein_coding	coding:non-coding
0.0013196	1.080594	0.3364572	SKCM-US	gender	0.01378686	ICGC	TACC2	ZAN	protein_coding	protein_coding	coding:coding
0.01432684	0.7659502	0.3127652	SKCM-US	gender	0.03730266	ICGC	MXRA5	ZAN	protein_coding	protein_coding	coding:coding
0.01432684	0.7659502	0.3127652	SKCM-US	gender	0.03730266	ICGC	COL4A4	ZAN	protein_coding	protein_coding	coding:coding
0.00674209	0.8658742	0.3195908	SKCM-US	gender	0.025351	ICGC	PCLO	ZNF536	protein_coding	protein_coding	coding:coding
0.0002340972	1.321869	0.3592955	SKCM-US	gender	0.01092143	ICGC	ZFHX4	ZNF831	protein_coding	protein_coding	coding:coding
0.01811458	0.740756	0.3134457	SKCM-US	gender	0.04198965	ICGC	DNAH5	ABCA12	protein_coding	protein_coding	coding:coding
0.008625416	0.8410969	0.3202282	SKCM-US	gender	0.02865393	ICGC	DNAH7	ABCA13	protein_coding	protein_coding	coding:coding
0.003922925	0.9460984	0.3280174	SKCM-US	gender	0.0202045	ICGC	CUBN	ADGRV1	protein_coding	protein_coding	coding:coding
0.0007312343	1.173647	0.3474805	SKCM-US	gender	0.01243407	ICGC	CNTN5	ADGRV1	protein_coding	protein_coding	coding:coding
0.008625416	0.8410969	0.3202282	SKCM-US	gender	0.02865393	ICGC	PPP1R3A	ADGRV1	protein_coding	protein_coding	coding:coding
0.01811458	0.740756	0.3134457	SKCM-US	gender	0.04198965	ICGC	USP29	ADGRV1	protein_coding	protein_coding	coding:coding
0.01811458	0.740756	0.3134457	SKCM-US	gender	0.04198965	ICGC	NEB	AHNAK2	protein_coding	protein_coding	coding:coding
0.003922925	0.9460984	0.3280174	SKCM-US	gender	0.0202045	ICGC	DNAH7	ANKRD30A	protein_coding	protein_coding	coding:coding
0.008625416	0.8410969	0.3202282	SKCM-US	gender	0.02865393	ICGC	CNTNAP2	CACNA1E	protein_coding	protein_coding	coding:coding
0.01811458	0.740756	0.3134457	SKCM-US	gender	0.04198965	ICGC	THSD7B	CD163	protein_coding	protein_coding	coding:coding
0.01811458	0.740756	0.3134457	SKCM-US	gender	0.04198965	ICGC	XIRP2	CD163L1	protein_coding	protein_coding	coding:coding
0.001717474	1.056598	0.3370134	SKCM-US	gender	0.014969	ICGC	CSMD2	CNTN5	protein_coding	protein_coding	coding:coding
0.008625416	0.8410969	0.3202282	SKCM-US	gender	0.02865393	ICGC	ANK3	COL22A1	protein_coding	protein_coding	coding:coding
0.003922925	0.9460984	0.3280174	SKCM-US	gender	0.0202045	ICGC	MXRA5	COL3A1	protein_coding	protein_coding	coding:coding
0.003922925	0.9460984	0.3280174	SKCM-US	gender	0.0202045	ICGC	FMN2	CSMD1	protein_coding	protein_coding	coding:coding
0.003922925	0.9460984	0.3280174	SKCM-US	gender	0.0202045	ICGC	CD163L1	CSMD1	protein_coding	protein_coding	coding:coding
0.003922925	0.9460984	0.3280174	SKCM-US	gender	0.0202045	ICGC	ADAM18	CSMD1	protein_coding	protein_coding	coding:coding
0.001717474	1.056598	0.3370134	SKCM-US	gender	0.014969	ICGC	COL6A3	CSMD1	protein_coding	protein_coding	coding:coding
0.01811458	0.740756	0.3134457	SKCM-US	gender	0.04198965	ICGC	SI	CSMD3	protein_coding	protein_coding	coding:coding
0.01811458	0.740756	0.3134457	SKCM-US	gender	0.04198965	ICGC	HYDIN	DMBT1	protein_coding	protein_coding	coding:coding
0.01811458	0.740756	0.3134457	SKCM-US	gender	0.04198965	ICGC	ASXL3	DNAH10	protein_coding	protein_coding	coding:coding
0.0003068414	1.298592	0.3597752	SKCM-US	gender	0.01111244	ICGC	HYDIN	DNAH10	protein_coding	protein_coding	coding:coding
0.001717474	1.056598	0.3370134	SKCM-US	gender	0.014969	ICGC	MUC17	DNAH10	protein_coding	protein_coding	coding:coding
0.008625416	0.8410969	0.3202282	SKCM-US	gender	0.02865393	ICGC	ZAN	DNAH10	protein_coding	protein_coding	coding:coding
0.01811458	0.740756	0.3134457	SKCM-US	gender	0.04198965	ICGC	DNAH9	DNAH11	protein_coding	protein_coding	coding:coding
0.003922925	0.9460984	0.3280174	SKCM-US	gender	0.0202045	ICGC	CSMD1	DNAH2	protein_coding	protein_coding	coding:coding
0.01811458	0.740756	0.3134457	SKCM-US	gender	0.04198965	ICGC	DNAH11	DNAH3	protein_coding	protein_coding	coding:coding
0.003922925	0.9460984	0.3280174	SKCM-US	gender	0.0202045	ICGC	CFTR	DNAH5	protein_coding	protein_coding	coding:coding
0.0003068414	1.298592	0.3597752	SKCM-US	gender	0.01111244	ICGC	ZAN	FAM135B	protein_coding	protein_coding	coding:coding
0.003922925	0.9460984	0.3280174	SKCM-US	gender	0.0202045	ICGC	COL4A4	FAM135B	protein_coding	protein_coding	coding:coding
0.003922925	0.9460984	0.3280174	SKCM-US	gender	0.0202045	ICGC	TTN	FAM83B	protein_coding	protein_coding	coding:coding
0.01811458	0.740756	0.3134457	SKCM-US	gender	0.04198965	ICGC	COL4A4	FAT3	protein_coding	protein_coding	coding:coding
0.008625416	0.8410969	0.3202282	SKCM-US	gender	0.02865393	ICGC	ZNF804A	FAT4	protein_coding	protein_coding	coding:coding
0.01811458	0.740756	0.3134457	SKCM-US	gender	0.04198965	ICGC	UNC79	FAT4	protein_coding	protein_coding	coding:coding
0.001717474	1.056598	0.3370134	SKCM-US	gender	0.014969	ICGC	DPYD	FLG-AS1	protein_coding	none protein_coding	coding:non-coding
0.003922925	0.9460984	0.3280174	SKCM-US	gender	0.0202045	ICGC	PCDH18	FLG-AS1	protein_coding	none protein_coding	coding:non-coding
0.008625416	0.8410969	0.3202282	SKCM-US	gender	0.02865393	ICGC	ANKRD30A	FLG-AS1	protein_coding	none protein_coding	coding:non-coding
0.008625416	0.8410969	0.3202282	SKCM-US	gender	0.02865393	ICGC	HMCN1	FLG-AS1	protein_coding	none protein_coding	coding:non-coding
0.0003068414	1.298592	0.3597752	SKCM-US	gender	0.01111244	ICGC	LPA	FLG-AS1	protein_coding	none protein_coding	coding:non-coding
0.0007312343	1.173647	0.3474805	SKCM-US	gender	0.01243407	ICGC	MYO18B	FLG-AS1	protein_coding	none protein_coding	coding:non-coding
0.0007312343	1.173647	0.3474805	SKCM-US	gender	0.01243407	ICGC	STAB2	FLG-AS1	protein_coding	none protein_coding	coding:non-coding
0.001717474	1.056598	0.3370134	SKCM-US	gender	0.014969	ICGC	COL21A1	FLG-AS1	protein_coding	none protein_coding	coding:non-coding
0.01811458	0.740756	0.3134457	SKCM-US	gender	0.04198965	ICGC	DNAH7	FREM1	protein_coding	protein_coding	coding:coding
0.003922925	0.9460984	0.3280174	SKCM-US	gender	0.0202045	ICGC	OBSCN	GRIN2A	protein_coding	protein_coding	coding:coding
0.008625416	0.8410969	0.3202282	SKCM-US	gender	0.02865393	ICGC	DNAH5	GRIN2B	protein_coding	protein_coding	coding:coding
0.0007312343	1.173647	0.3474805	SKCM-US	gender	0.01243407	ICGC	TTN	GRIN3A	protein_coding	protein_coding	coding:coding
0.008625416	0.8410969	0.3202282	SKCM-US	gender	0.02865393	ICGC	FRAS1	HYDIN	protein_coding	protein_coding	coding:coding
0.001717474	1.056598	0.3370134	SKCM-US	gender	0.014969	ICGC	MAGEC1	HYDIN	protein_coding	protein_coding	coding:coding
0.003922925	0.9460984	0.3280174	SKCM-US	gender	0.0202045	ICGC	STXBP5L	HYDIN	protein_coding	protein_coding	coding:coding
0.0007312343	1.173647	0.3474805	SKCM-US	gender	0.01243407	ICGC	KCNH5	LRP1B	protein_coding	protein_coding	coding:coding
0.003922925	0.9460984	0.3280174	SKCM-US	gender	0.0202045	ICGC	MYH2	LRP1B	protein_coding	protein_coding	coding:coding
0.008625416	0.8410969	0.3202282	SKCM-US	gender	0.02865393	ICGC	PTPRD	LRP1B	protein_coding	protein_coding	coding:coding
0.001717474	1.056598	0.3370134	SKCM-US	gender	0.014969	ICGC	UNC79	LRP1B	protein_coding	protein_coding	coding:coding
0.003922925	0.9460984	0.3280174	SKCM-US	gender	0.0202045	ICGC	PTPRD	MGAM	protein_coding	protein_coding	coding:coding
0.003922925	0.9460984	0.3280174	SKCM-US	gender	0.0202045	ICGC	ADAM18	MGAM	protein_coding	protein_coding	coding:coding
0.01811458	0.740756	0.3134457	SKCM-US	gender	0.04198965	ICGC	ARMC4	MGAM	protein_coding	protein_coding	coding:coding
0.003922925	0.9460984	0.3280174	SKCM-US	gender	0.0202045	ICGC	USH2A	MMP26	protein_coding	protein_coding	coding:coding
0.0007312343	1.173647	0.3474805	SKCM-US	gender	0.01243407	ICGC	FAM135B	MMP26	protein_coding	protein_coding	coding:coding
0.008625416	0.8410969	0.3202282	SKCM-US	gender	0.02865393	ICGC	SPHKAP	MROH2B	protein_coding	protein_coding	coding:coding
0.008625416	0.8410969	0.3202282	SKCM-US	gender	0.02865393	ICGC	CFH	MUC16	protein_coding	protein_coding	coding:coding
0.0003068414	1.298592	0.3597752	SKCM-US	gender	0.01111244	ICGC	RGPD3	MUC16	protein_coding	protein_coding	coding:coding
0.003922925	0.9460984	0.3280174	SKCM-US	gender	0.0202045	ICGC	DNAH1	MUC16	protein_coding	protein_coding	coding:coding
0.008625416	0.8410969	0.3202282	SKCM-US	gender	0.02865393	ICGC	BRINP1	MUC16	protein_coding	protein_coding	coding:coding
0.008625416	0.8410969	0.3202282	SKCM-US	gender	0.02865393	ICGC	SH3RF2	MUC16	protein_coding	protein_coding	coding:coding
0.01811458	0.740756	0.3134457	SKCM-US	gender	0.04198965	ICGC	CDH8	MUC16	protein_coding	protein_coding	coding:coding
0.008625416	0.8410969	0.3202282	SKCM-US	gender	0.02865393	ICGC	ARAP2	MUC16	protein_coding	protein_coding	coding:coding
0.008625416	0.8410969	0.3202282	SKCM-US	gender	0.02865393	ICGC	ACSM2B	MUC16	protein_coding	protein_coding	coding:coding
0.01811458	0.740756	0.3134457	SKCM-US	gender	0.04198965	ICGC	MMP26	MUC17	protein_coding	protein_coding	coding:coding
0.001717474	1.056598	0.3370134	SKCM-US	gender	0.014969	ICGC	SVEP1	MUC17	protein_coding	protein_coding	coding:coding
0.01811458	0.740756	0.3134457	SKCM-US	gender	0.04198965	ICGC	LRP2	MXRA5	protein_coding	protein_coding	coding:coding
0.003922925	0.9460984	0.3280174	SKCM-US	gender	0.0202045	ICGC	DNAH5	MYO15A	protein_coding	protein_coding	coding:coding
0.008625416	0.8410969	0.3202282	SKCM-US	gender	0.02865393	ICGC	MUC16	NF1	protein_coding	protein_coding	coding:coding
0.003922925	0.9460984	0.3280174	SKCM-US	gender	0.0202045	ICGC	OBSCN	NPAP1	protein_coding	protein_coding	coding:coding
0.003922925	0.9460984	0.3280174	SKCM-US	gender	0.0202045	ICGC	SI	OBSCN	protein_coding	protein_coding	coding:coding
0.0007312343	1.173647	0.3474805	SKCM-US	gender	0.01243407	ICGC	MXRA5	PAPPA2	protein_coding	protein_coding	coding:coding
0.003922925	0.9460984	0.3280174	SKCM-US	gender	0.0202045	ICGC	CSMD1	PCDH18	protein_coding	protein_coding	coding:coding
0.008625416	0.8410969	0.3202282	SKCM-US	gender	0.02865393	ICGC	DNAH3	PCDHA2	protein_coding	protein_coding	coding:coding
0.001717474	1.056598	0.3370134	SKCM-US	gender	0.014969	ICGC	ASXL3	PCDHA2	protein_coding	protein_coding	coding:coding
0.0003068414	1.298592	0.3597752	SKCM-US	gender	0.01111244	ICGC	COL5A1	PCDHA9	protein_coding	protein_coding	coding:coding
0.0001291461	1.4332	0.3743911	SKCM-US	gender	0.01092143	ICGC	SVEP1	PCDHA9	protein_coding	protein_coding	coding:coding
0.003922925	0.9460984	0.3280174	SKCM-US	gender	0.0202045	ICGC	C6	PCDHA9	protein_coding	protein_coding	coding:coding
0.003922925	0.9460984	0.3280174	SKCM-US	gender	0.0202045	ICGC	FAT2	PCLO	protein_coding	protein_coding	coding:coding
0.0003068414	1.298592	0.3597752	SKCM-US	gender	0.01111244	ICGC	MYOCD	PCLO	protein_coding	protein_coding	coding:coding
0.001717474	1.056598	0.3370134	SKCM-US	gender	0.014969	ICGC	MYO15A	PCLO	protein_coding	protein_coding	coding:coding
0.008625416	0.8410969	0.3202282	SKCM-US	gender	0.02865393	ICGC	FCRL5	PCLO	protein_coding	protein_coding	coding:coding
0.003922925	0.9460984	0.3280174	SKCM-US	gender	0.0202045	ICGC	NLRP5	PCLO	protein_coding	protein_coding	coding:coding
0.001717474	1.056598	0.3370134	SKCM-US	gender	0.014969	ICGC	SCN9A	PCLO	protein_coding	protein_coding	coding:coding
0.001717474	1.056598	0.3370134	SKCM-US	gender	0.014969	ICGC	SLIT2	PCLO	protein_coding	protein_coding	coding:coding
0.01811458	0.740756	0.3134457	SKCM-US	gender	0.04198965	ICGC	SORL1	PKHD1L1	protein_coding	protein_coding	coding:coding
0.0001291461	1.4332	0.3743911	SKCM-US	gender	0.01092143	ICGC	COL21A1	PKHD1L1	protein_coding	protein_coding	coding:coding
0.008625416	0.8410969	0.3202282	SKCM-US	gender	0.02865393	ICGC	MAGEC1	PKHD1L1	protein_coding	protein_coding	coding:coding
0.0007312343	1.173647	0.3474805	SKCM-US	gender	0.01243407	ICGC	ANKRD30A	PKHD1L1	protein_coding	protein_coding	coding:coding
0.008625416	0.8410969	0.3202282	SKCM-US	gender	0.02865393	ICGC	GRIN2A	PTPRT	protein_coding	protein_coding	coding:coding
0.003922925	0.9460984	0.3280174	SKCM-US	gender	0.0202045	ICGC	PCDH15	PTPRT	protein_coding	protein_coding	coding:coding
0.003922925	0.9460984	0.3280174	SKCM-US	gender	0.0202045	ICGC	NEB	PTPRT	protein_coding	protein_coding	coding:coding
0.01811458	0.740756	0.3134457	SKCM-US	gender	0.04198965	ICGC	SYNE1	PTPRT	protein_coding	protein_coding	coding:coding
0.003922925	0.9460984	0.3280174	SKCM-US	gender	0.0202045	ICGC	ZAN	PTPRT	protein_coding	protein_coding	coding:coding
0.003922925	0.9460984	0.3280174	SKCM-US	gender	0.0202045	ICGC	ADGRV1	RGPD4	protein_coding	protein_coding	coding:coding
0.003922925	0.9460984	0.3280174	SKCM-US	gender	0.0202045	ICGC	COL4A4	RYR1	protein_coding	protein_coding	coding:coding
0.003922925	0.9460984	0.3280174	SKCM-US	gender	0.0202045	ICGC	HYDIN	RYR3	protein_coding	protein_coding	coding:coding
0.01811458	0.740756	0.3134457	SKCM-US	gender	0.04198965	ICGC	SPHKAP	SCN11A	protein_coding	protein_coding	coding:coding
0.01811458	0.740756	0.3134457	SKCM-US	gender	0.04198965	ICGC	COL4A4	SCN11A	protein_coding	protein_coding	coding:coding
0.003922925	0.9460984	0.3280174	SKCM-US	gender	0.0202045	ICGC	UNC13C	SPHKAP	protein_coding	protein_coding	coding:coding
0.01811458	0.740756	0.3134457	SKCM-US	gender	0.04198965	ICGC	LRP2	STXBP5L	protein_coding	protein_coding	coding:coding
0.01811458	0.740756	0.3134457	SKCM-US	gender	0.04198965	ICGC	COL4A4	SVEP1	protein_coding	protein_coding	coding:coding
0.008625416	0.8410969	0.3202282	SKCM-US	gender	0.02865393	ICGC	CNTNAP5	TTN	protein_coding	protein_coding	coding:coding
0.0003068414	1.298592	0.3597752	SKCM-US	gender	0.01111244	ICGC	FREM2	TTN	protein_coding	protein_coding	coding:coding
0.008625416	0.8410969	0.3202282	SKCM-US	gender	0.02865393	ICGC	TRHDE	TTN	protein_coding	protein_coding	coding:coding
0.01811458	0.740756	0.3134457	SKCM-US	gender	0.04198965	ICGC	CHD6	TTN-AS1	protein_coding	none protein_coding	coding:non-coding
0.003922925	0.9460984	0.3280174	SKCM-US	gender	0.0202045	ICGC	CHD5	TTN-AS1	protein_coding	none protein_coding	coding:non-coding
0.01811458	0.740756	0.3134457	SKCM-US	gender	0.04198965	ICGC	CFH	TTN-AS1	protein_coding	none protein_coding	coding:non-coding
0.003922925	0.9460984	0.3280174	SKCM-US	gender	0.0202045	ICGC	TTN	XIRP1	protein_coding	protein_coding	coding:coding
0.01811458	0.740756	0.3134457	SKCM-US	gender	0.04198965	ICGC	CSMD1	ZDBF2	protein_coding	protein_coding	coding:coding
0.003922925	0.9460984	0.3280174	SKCM-US	gender	0.0202045	ICGC	DNAH7	ZNF804A	protein_coding	protein_coding	coding:coding
0.002231233	1.03222	0.3375925	SKCM-US	gender	0.01628533	ICGC	TACC2	AC005323.2	protein_coding	none protein_coding	coding:non-coding
0.002231233	1.03222	0.3375925	SKCM-US	gender	0.01628533	ICGC	DNAH10	AC005323.2	protein_coding	none protein_coding	coding:non-coding
0.01100306	0.8159027	0.3208929	SKCM-US	gender	0.03231309	ICGC	FAM135B	AC005323.2	protein_coding	none protein_coding	coding:non-coding
0.01100306	0.8159027	0.3208929	SKCM-US	gender	0.03231309	ICGC	ANK3	ACAN	protein_coding	protein_coding	coding:coding
0.02282543	0.7151261	0.3141556	SKCM-US	gender	0.04815316	ICGC	ADGRV1	ADAM18	protein_coding	protein_coding	coding:coding
0.002231233	1.03222	0.3375925	SKCM-US	gender	0.01628533	ICGC	DNAH7	ADAMTS20	protein_coding	protein_coding	coding:coding
0.01100306	0.8159027	0.3208929	SKCM-US	gender	0.03231309	ICGC	CSMD3	AHNAK2	protein_coding	protein_coding	coding:coding
0.01100306	0.8159027	0.3208929	SKCM-US	gender	0.03231309	ICGC	RP1	AHNAK2	protein_coding	protein_coding	coding:coding
0.0004018442	1.274964	0.3602743	SKCM-US	gender	0.01156321	ICGC	MECOM	ANK3	protein_coding	protein_coding	coding:coding
0.01100306	0.8159027	0.3208929	SKCM-US	gender	0.03231309	ICGC	COL5A1	ANK3	protein_coding	protein_coding	coding:coding
0.01100306	0.8159027	0.3208929	SKCM-US	gender	0.03231309	ICGC	DNAH5	ANO4	protein_coding	protein_coding	coding:coding
0.01100306	0.8159027	0.3208929	SKCM-US	gender	0.03231309	ICGC	CSMD2	ARMC4	protein_coding	protein_coding	coding:coding
0.02282543	0.7151261	0.3141556	SKCM-US	gender	0.04815316	ICGC	ZNF831	BRAF	protein_coding	protein_coding	coding:coding
0.01100306	0.8159027	0.3208929	SKCM-US	gender	0.03231309	ICGC	LRP2	CACNA1E	protein_coding	protein_coding	coding:coding
0.02282543	0.7151261	0.3141556	SKCM-US	gender	0.04815316	ICGC	APOB	CACNA1E	protein_coding	protein_coding	coding:coding
0.005055927	0.9213211	0.3286385	SKCM-US	gender	0.02255984	ICGC	SPTA1	CACNA1E	protein_coding	protein_coding	coding:coding
0.005055927	0.9213211	0.3286385	SKCM-US	gender	0.02255984	ICGC	MROH2B	CACNA1E	protein_coding	protein_coding	coding:coding
[truncated: 52,361 more rows]
