# Supplementary material for: Comprehensive Analysis of Co-Mutations Identifies Cooperating Mechanisms of Tumorigenesis
Source: Cancers (Basel). 2022 Jan 14;14(2):415. doi: 10.3390/cancers14020415 (PMC8774165; doi:10.3390/cancers14020415)
Supplement: Supplementary file 1 [file cancers-14-00415-s001.zip › Supplementary Table S4.csv]

coef	exp(coef)	se(coef)	z	Pr(>|z|)	nco	num	gene1	gene2	death	project	LCL0.95	UCL0.95	adjp	Type1	Type2
0.694633509	2.002974868	0.234682996	2.959880009	0.003077589	56	507	TP53	DNAH5	129	HNSC	1.264472244	3.172792714	0.05231901	protein_coding	protein_coding
-1.575897461	0.206821855	0.72174091	-2.183467002	0.029001436	29	289	KMT2C	TTN-AS1	57	CESC-US	0.050261814	0.851049252	0.058002873	protein_coding	none protein_coding
-1.275246066	0.279362218	0.348789235	-3.656208214	0.000255973	208	530	PTEN	ARID1A	57	UCEC	0.141017263	0.553430464	0.069092647	protein_coding	protein_coding
-1.295973986	0.273631222	0.363693933	-3.563364328	0.000366132	195	530	PIK3CA	PTEN	57	UCEC	0.134147667	0.55814646	0.069092647	protein_coding	protein_coding
-0.883870886	0.413180438	0.336275358	-2.628414079	0.008578402	178	530	PTEN	TTN	57	UCEC	0.213745209	0.798698953	0.069092647	protein_coding	protein_coding
-1.517117649	0.219343201	0.468636001	-3.237304956	0.001206644	143	530	PIK3CA	ARID1A	57	UCEC	0.087541334	0.549585409	0.069092647	protein_coding	protein_coding
-0.918598657	0.399077894	0.382098912	-2.404086032	0.016212957	138	530	TTN	ARID1A	57	UCEC	0.188715908	0.84393079	0.069092647	protein_coding	protein_coding
-1.371001304	0.253852649	0.468547811	-2.926064901	0.003432793	128	530	PTEN	CTCF	57	UCEC	0.101331798	0.635942204	0.069092647	protein_coding	protein_coding
-1.155404484	0.314930127	0.431924904	-2.675012422	0.007472648	128	530	PTEN	ZFHX3	57	UCEC	0.13506795	0.734304364	0.069092647	protein_coding	protein_coding
-0.847174144	0.428624453	0.403683603	-2.09860925	0.03585136	124	530	PTEN	CTNNB1	57	UCEC	0.194291823	0.945582365	0.069092647	protein_coding	protein_coding
-0.831744865	0.435289103	0.403885754	-2.059356779	0.039460073	121	530	PTEN	OBSCN	57	UCEC	0.197234689	0.960665709	0.069092647	protein_coding	protein_coding
-1.589062532	0.204116875	0.519118175	-3.06108052	0.002205398	120	530	PTEN	MUC16	57	UCEC	0.073789845	0.564626454	0.069092647	protein_coding	protein_coding
-1.568393278	0.208379722	0.519123666	-3.021232477	0.00251748	117	530	PTEN	KRAS	57	UCEC	0.075330087	0.57642451	0.069092647	protein_coding	protein_coding
-1.032461164	0.356129388	0.432266399	-2.388483509	0.016918068	114	530	PTEN	DST	57	UCEC	0.152635385	0.830922273	0.069092647	protein_coding	protein_coding
-0.995153358	0.369666749	0.431954514	-2.303838313	0.021231722	112	530	TTN	MUC16	57	UCEC	0.158534316	0.861980603	0.069092647	protein_coding	protein_coding
-1.44583159	0.235550114	0.519029434	-2.785644698	0.005342139	112	530	PTEN	MUC5B	57	UCEC	0.085168019	0.651463506	0.069092647	protein_coding	protein_coding
-0.863938754	0.421498629	0.404204473	-2.137380491	0.032567057	111	530	TTN	ZFHX3	57	UCEC	0.190866791	0.93081197	0.069092647	protein_coding	protein_coding
-1.124749753	0.324733721	0.468672421	-2.399863322	0.016401195	108	530	TTN	DST	57	UCEC	0.129594142	0.813709539	0.069092647	protein_coding	protein_coding
-1.725491387	0.178085521	0.593834203	-2.905678687	0.003664575	108	530	PTEN	MACF1	57	UCEC	0.055609211	0.570309348	0.069092647	protein_coding	protein_coding
-0.942243902	0.389752288	0.432179723	-2.180213118	0.029241668	108	530	RYR2	PTEN	57	UCEC	0.167074383	0.909216859	0.069092647	protein_coding	protein_coding
-1.161453935	0.313030724	0.468736812	-2.477838104	0.013218111	107	530	PIK3R1	ARID1A	57	UCEC	0.124907966	0.784483466	0.069092647	protein_coding	protein_coding
-1.310068612	0.269801544	0.518740137	-2.525481488	0.011553987	107	530	PTEN	CSMD3	57	UCEC	0.097607662	0.745770069	0.069092647	protein_coding	protein_coding
-1.265837914	0.282002903	0.519051242	-2.43875327	0.014738027	107	530	PTEN	KMT2B	57	UCEC	0.101959628	0.779971827	0.069092647	protein_coding	protein_coding
-1.725648868	0.178057478	0.593671112	-2.90674219	0.003652141	106	530	ARID1A	CTCF	57	UCEC	0.05561823	0.570037296	0.069092647	protein_coding	protein_coding
-0.87223686	0.41801546	0.431883568	-2.019611127	0.04342374	106	530	PTEN	KMT2C	57	UCEC	0.179293948	0.974583512	0.069092647	protein_coding	protein_coding
-0.889073975	0.411036206	0.432062407	-2.057744347	0.039614681	106	530	PTEN	SYNE1	57	UCEC	0.17623864	0.958647677	0.069092647	protein_coding	protein_coding
-1.364283011	0.255563847	0.51896565	-2.628850313	0.008567406	106	530	PTEN	ZFHX4	57	UCEC	0.092415951	0.706727345	0.069092647	protein_coding	protein_coding
-1.359501497	0.256788755	0.518909195	-2.619921768	0.008794994	104	530	PTEN	FAT1	57	UCEC	0.092869173	0.710036094	0.069092647	protein_coding	protein_coding
-0.892848266	0.40948776	0.432221095	-2.065721167	0.038854815	104	530	TTN	SYNE1	57	UCEC	0.175520118	0.955333372	0.069092647	protein_coding	protein_coding
-1.361464401	0.256285198	0.519073684	-2.622873099	0.008719174	103	530	ZFHX3	ARID1A	57	UCEC	0.092657181	0.708872229	0.069092647	protein_coding	protein_coding
-1.065388924	0.344593808	0.468626267	-2.273429805	0.023000292	103	530	RYR2	TTN	57	UCEC	0.13753231	0.863396336	0.069092647	protein_coding	protein_coding
-2.040772693	0.129928277	0.720068159	-2.834138223	0.004594945	101	530	PTEN	NEB	57	UCEC	0.031678841	0.532890615	0.069092647	protein_coding	protein_coding
-0.951766636	0.386058396	0.468575574	-2.031191317	0.042235591	99	530	OBSCN	ARID1A	57	UCEC	0.154096729	0.967191747	0.069092647	protein_coding	protein_coding
-1.288478871	0.275689824	0.518851298	-2.483329762	0.013016053	98	530	PTEN	DMD	57	UCEC	0.099716171	0.762212168	0.069092647	protein_coding	protein_coding
-1.579981692	0.205978869	0.593545	-2.661940866	0.007769153	98	530	TTN	FAT1	57	UCEC	0.064355692	0.659262501	0.069092647	protein_coding	protein_coding
-1.205194633	0.299633675	0.518708368	-2.323453231	0.020154817	97	530	PTEN	DNAH7	57	UCEC	0.108406955	0.828178778	0.069092647	protein_coding	protein_coding
-1.217869563	0.295859807	0.518752659	-2.34768833	0.018890321	96	530	PTEN	FLG	57	UCEC	0.107032284	0.817818907	0.069092647	protein_coding	protein_coding
-1.983797258	0.137545947	0.720130198	-2.754775821	0.005873236	96	530	PTEN	HUWE1	57	UCEC	0.033532088	0.564202489	0.069092647	protein_coding	protein_coding
-1.989562403	0.136755256	0.720124457	-2.762803545	0.005730725	95	530	DNAH5	PTEN	57	UCEC	0.033339702	0.560952825	0.069092647	protein_coding	protein_coding
-2.060687637	0.127366358	0.720587912	-2.859731066	0.004240004	94	530	KRAS	ARID1A	57	UCEC	0.03102258	0.522915535	0.069092647	protein_coding	protein_coding
-1.120396043	0.326150599	0.518793481	-2.159618584	0.030802209	94	530	PTEN	ASH1L	57	UCEC	0.117981049	0.901621184	0.069092647	protein_coding	protein_coding
-1.445850783	0.235545593	0.593387492	-2.436604753	0.014825875	94	530	TTN	CSMD3	57	UCEC	0.073616193	0.753661991	0.069092647	protein_coding	protein_coding
-1.519480979	0.218825432	0.59348387	-2.560273424	0.010458984	94	530	TTN	HUWE1	57	UCEC	0.068377643	0.700295707	0.069092647	protein_coding	protein_coding
-1.261458571	0.283240598	0.519237324	-2.429445096	0.015121955	94	530	TTN	MACF1	57	UCEC	0.10236978	0.783680854	0.069092647	protein_coding	protein_coding
-1.62619015	0.19667746	0.593846094	-2.738403379	0.00617383	94	530	PTEN	USH2A	57	UCEC	0.061413322	0.629863717	0.069092647	protein_coding	protein_coding
-1.573126196	0.207395808	0.593749356	-2.649478572	0.008061608	94	530	TTN	ZFHX4	57	UCEC	0.064772449	0.664063529	0.069092647	protein_coding	protein_coding
-1.050031282	0.349926803	0.469131027	-2.23824736	0.025204929	93	530	PTEN	ANK3	57	UCEC	0.139522682	0.877626241	0.069092647	protein_coding	protein_coding
-0.961891749	0.382169233	0.468923234	-2.051277648	0.040239916	93	530	DST	ARID1A	57	UCEC	0.152440444	0.958100874	0.069092647	protein_coding	protein_coding
-1.606322549	0.200624044	0.593865977	-2.704857007	0.00683338	93	530	MUC16	ARID1A	57	UCEC	0.062643218	0.642527775	0.069092647	protein_coding	protein_coding
-2.007265126	0.134355618	0.720269639	-2.786824568	0.005322729	93	530	TTN	MUC5B	57	UCEC	0.032745373	0.551266658	0.069092647	protein_coding	protein_coding
-1.251068456	0.286198843	0.519206722	-2.409576771	0.015971036	93	530	TTN	PCLO	57	UCEC	0.103445163	0.791818341	0.069092647	protein_coding	protein_coding
-1.588359967	0.204260331	0.593907165	-2.674424662	0.007485759	93	530	PTEN	TENM1	57	UCEC	0.06377347	0.654226325	0.069092647	protein_coding	protein_coding
-0.976823028	0.376505348	0.468669941	-2.084245097	0.037137879	93	530	PTEN	TNRC6B	57	UCEC	0.150255799	0.943432987	0.069092647	protein_coding	protein_coding
-1.14505015	0.318207959	0.518879782	-2.206773494	0.027329888	92	530	PTEN	ANK2	57	UCEC	0.115088426	0.879813103	0.069092647	protein_coding	protein_coding
-2.71902603	0.065938946	1.009655228	-2.693024267	0.007080712	92	530	PTEN	ATM	57	UCEC	0.009113939	0.477065356	0.069092647	protein_coding	protein_coding
-1.534873197	0.215483013	0.593587606	-2.585756813	0.009716546	92	530	PTEN	CACNA1E	57	UCEC	0.067319529	0.689739362	0.069092647	protein_coding	protein_coding
-1.195941983	0.302418947	0.519733197	-2.301069068	0.021387727	92	530	PTEN	FAT2	57	UCEC	0.109195104	0.837557872	0.069092647	protein_coding	protein_coding
-0.956481485	0.384242473	0.46862761	-2.041026743	0.041248169	92	530	TTN	KMT2C	57	UCEC	0.153356255	0.962740505	0.069092647	protein_coding	protein_coding
-1.930850888	0.145024746	0.719987012	-2.681785721	0.007323035	92	530	TTN	NEB	57	UCEC	0.035365255	0.594712999	0.069092647	protein_coding	protein_coding
-0.986828632	0.372756968	0.468678994	-2.105553364	0.035243167	92	530	RYR3	PTEN	57	UCEC	0.148757255	0.93405701	0.069092647	protein_coding	protein_coding
-1.988073377	0.13695904	0.720301596	-2.760056883	0.00577913	92	530	PTEN	SYNE2	57	UCEC	0.033377792	0.561983803	0.069092647	protein_coding	protein_coding
-0.994172725	0.370029434	0.468807084	-2.120643562	0.033951809	91	530	PTEN	DNAH10	57	UCEC	0.147631702	0.927455151	0.069092647	protein_coding	protein_coding
-1.908738815	0.148267261	0.720135646	-2.650526778	0.008036636	91	530	PIK3CA	MUC16	57	UCEC	0.036145433	0.608186958	0.069092647	protein_coding	protein_coding
0.687153364	1.988048222	0.285622149	2.405812599	0.01613654	91	530	TP53	PIK3CA	57	UCEC	1.135796256	3.479792885	0.069092647	protein_coding	protein_coding
-1.915098755	0.147327283	0.720134156	-2.659363868	0.007828836	91	530	PTEN	TAF1	57	UCEC	0.035916384	0.604329434	0.069092647	protein_coding	protein_coding
-1.966397689	0.139960129	0.720543779	-2.729046794	0.006351769	91	530	TTN	TENM1	57	UCEC	0.03409299	0.57457084	0.069092647	protein_coding	protein_coding
-0.948683703	0.387250425	0.468689973	-2.02411777	0.042958036	91	530	PIK3CA	ZFHX3	57	UCEC	0.154537878	0.970395697	0.069092647	protein_coding	protein_coding
-1.258014201	0.284217866	0.519208897	-2.422944229	0.01539529	90	530	TTN	ANK3	57	UCEC	0.102728711	0.786340981	0.069092647	protein_coding	protein_coding
-1.359523275	0.256783163	0.593682681	-2.289983047	0.022022299	90	530	KMT2B	ARID1A	57	UCEC	0.080207253	0.822090149	0.069092647	protein_coding	protein_coding
-1.865515798	0.154816335	0.720011907	-2.590951316	0.009571103	90	530	TTN	FLG	57	UCEC	0.037751158	0.634897024	0.069092647	protein_coding	protein_coding
-1.475999286	0.228550226	0.593797462	-2.485694837	0.012929879	90	530	PTEN	PDE4DIP	57	UCEC	0.071372523	0.731867158	0.069092647	protein_coding	protein_coding
-1.534607738	0.215540223	0.593602225	-2.585245934	0.009730956	90	530	PTEN	RYR1	57	UCEC	0.067335473	0.689942252	0.069092647	protein_coding	protein_coding
-1.059342271	0.346683759	0.518956278	-2.041293873	0.041221626	90	530	PIK3CA	SYNE1	57	UCEC	0.125368663	0.958689563	0.069092647	protein_coding	protein_coding
-1.213950013	0.29702172	0.519230665	-2.337978273	0.019388375	89	530	PTEN	ABCA13	57	UCEC	0.107352001	0.821800257	0.069092647	protein_coding	protein_coding
-1.409397832	0.244290343	0.593514366	-2.374665067	0.017564881	89	530	CSMD3	ARID1A	57	UCEC	0.076330248	0.781836473	0.069092647	protein_coding	protein_coding
-1.483149573	0.226921855	0.593779936	-2.497810188	0.012496308	88	530	MUC5B	ARID1A	57	UCEC	0.070866444	0.726627801	0.069092647	protein_coding	protein_coding
-1.233803335	0.291183002	0.519590024	-2.37457087	0.017569363	88	530	PTEN	ARID5B	57	UCEC	0.105167624	0.806213335	0.069092647	protein_coding	protein_coding
-2.002443068	0.135005054	0.720675305	-2.778564844	0.005459961	88	530	PTEN	DNAH8	57	UCEC	0.032877503	0.554371927	0.069092647	protein_coding	protein_coding
-1.119022233	0.326598976	0.519053624	-2.155889451	0.031092298	88	530	TTN	FAT2	57	UCEC	0.118083021	0.903321161	0.069092647	protein_coding	protein_coding
-1.522763762	0.218108254	0.593945805	-2.563809271	0.010353042	88	530	PTEN	HMCN1	57	UCEC	0.068091864	0.698632809	0.069092647	protein_coding	protein_coding
-1.054209166	0.348467899	0.519084073	-2.030902547	0.042264881	88	530	TTN	KMT2B	57	UCEC	0.125982289	0.963864665	0.069092647	protein_coding	protein_coding
-1.823178756	0.161511528	0.720144822	-2.531683489	0.011351641	88	530	TTN	PDE4DIP	57	UCEC	0.039373487	0.662526379	0.069092647	protein_coding	protein_coding
-1.47664523	0.228402643	0.593495151	-2.488049359	0.01284459	88	530	USP9X	PTEN	57	UCEC	0.071368711	0.73096132	0.069092647	protein_coding	protein_coding
-1.953012698	0.141846088	0.720224777	-2.711671077	0.006694499	88	530	TTN	RYR1	57	UCEC	0.034574002	0.581949192	0.069092647	protein_coding	protein_coding
-1.046639665	0.351115635	0.518716229	-2.01774999	0.043617306	87	530	TTN	ASH1L	57	UCEC	0.127031083	0.970488373	0.069092647	protein_coding	protein_coding
-1.493303724	0.224629315	0.593826543	-2.514713669	0.011912909	87	530	PTEN	ATRX	57	UCEC	0.070144088	0.719352555	0.069092647	protein_coding	protein_coding
-0.9330075	0.393368873	0.468604547	-1.991033817	0.04647717	87	530	PIK3CA	CTCF	57	UCEC	0.157005819	0.985562645	0.069092647	protein_coding	protein_coding
-1.882734614	0.152173401	0.720179844	-2.614256189	0.008942196	87	530	TTN	CTCF	57	UCEC	0.03709448	0.624263877	0.069092647	protein_coding	protein_coding
-1.433619482	0.238444314	0.593429762	-2.41581999	0.015699821	87	530	PIK3CA	CTNNB1	57	UCEC	0.07451597	0.763000076	0.069092647	protein_coding	protein_coding
-2.521776421	0.080316803	1.008964537	-2.499370721	0.012441408	87	530	PTEN	MED12	57	UCEC	0.011116254	0.580302402	0.069092647	protein_coding	protein_coding
-1.112242638	0.328820708	0.518953998	-2.143239365	0.032093883	87	530	TTN	TNRC6B	57	UCEC	0.118909512	0.909288548	0.069092647	protein_coding	protein_coding
-1.493455318	0.224595265	0.593719928	-2.515420567	0.011889046	87	530	TTN	USH2A	57	UCEC	0.070148113	0.719093233	0.069092647	protein_coding	protein_coding
-1.118073916	0.326908842	0.518994716	-2.154306935	0.031216109	87	530	DST	ZFHX3	57	UCEC	0.118208701	0.904073811	0.069092647	protein_coding	protein_coding
-2.693098672	0.067670924	1.009530132	-2.667675373	0.007637802	87	530	PTEN	ZNF292	57	UCEC	0.009355623	0.489476115	0.069092647	protein_coding	protein_coding
-1.844256341	0.158142881	0.72048993	-2.559725354	0.010475491	86	530	ZFHX4	ARID1A	57	UCEC	0.038526206	0.649147005	0.069092647	protein_coding	protein_coding
-1.118971601	0.326615513	0.519085672	-2.155658809	0.031110317	86	530	PTEN	BCOR	57	UCEC	0.118081582	0.903423643	0.069092647	protein_coding	protein_coding
-1.490990326	0.225149574	0.593661109	-2.511517604	0.012021329	86	530	TTN	CACNA1E	57	UCEC	0.070329348	0.720784878	0.069092647	protein_coding	protein_coding
-1.906215375	0.148641877	0.720063329	-2.647288509	0.00811401	86	530	PTEN	CHD4	57	UCEC	0.036241895	0.609637201	0.069092647	protein_coding	protein_coding
-1.509953663	0.220920215	0.593639294	-2.543554103	0.010973106	86	530	TTN	DNAH2	57	UCEC	0.069011185	0.707214937	0.069092647	protein_coding	protein_coding
-1.923783901	0.146053264	0.72036568	-2.670565734	0.007572354	86	530	TTN	DNAH8	57	UCEC	0.035589642	0.599375399	0.069092647	protein_coding	protein_coding
-1.430032988	0.239301028	0.593718993	-2.408602393	0.016013734	86	530	ARID1A	FAT1	57	UCEC	0.074741318	0.766175701	0.069092647	protein_coding	protein_coding
-1.116276449	0.327496979	0.518862514	-2.15139159	0.031445304	86	530	TTN	HMCN1	57	UCEC	0.118452058	0.905465664	0.069092647	protein_coding	protein_coding
-1.40488223	0.245395955	0.593348394	-2.367718939	0.017898127	86	530	TTN	LRP1B	57	UCEC	0.076700651	0.785119473	0.069092647	protein_coding	protein_coding
-1.400536671	0.246464658	0.593502416	-2.359782594	0.018285648	86	530	PTEN	MKI67	57	UCEC	0.077011432	0.788776763	0.069092647	protein_coding	protein_coding
-1.420669198	0.241552317	0.593426798	-2.394009172	0.016665332	86	530	PTEN	NBEA	57	UCEC	0.075487687	0.772940912	0.069092647	protein_coding	protein_coding
-1.110998172	0.329230169	0.518740466	-2.141722584	0.032215812	86	530	RYR3	TTN	57	UCEC	0.119107422	0.910039878	0.069092647	protein_coding	protein_coding
-1.447684535	0.235114057	0.593934845	-2.43744671	0.014791394	85	530	MACF1	ARID1A	57	UCEC	0.073402533	0.753088718	0.069092647	protein_coding	protein_coding
-1.373594257	0.253195273	0.593612795	-2.313956621	0.020670102	85	530	PIK3CA	CSMD3	57	UCEC	0.079097395	0.81049251	0.069092647	protein_coding	protein_coding
-1.161314339	0.313074424	0.519090081	-2.237211578	0.025272515	85	530	PTEN	DNAH2	57	UCEC	0.113185083	0.865976263	0.069092647	protein_coding	protein_coding
-1.867017327	0.154584049	0.720511393	-2.591239145	0.009563101	85	530	PTEN	FBN2	57	UCEC	0.037657631	0.634565354	0.069092647	protein_coding	protein_coding
-1.075985251	0.340961657	0.518726311	-2.074283159	0.038053021	85	530	PTEN	KIAA2022	57	UCEC	0.12335501	0.942441263	0.069092647	protein_coding	protein_coding
-1.240695695	0.289182965	0.519247719	-2.389410003	0.016875458	85	530	PIK3CA	KRAS	57	UCEC	0.104515361	0.800138721	0.069092647	protein_coding	protein_coding
-1.096589386	0.334008317	0.518890018	-2.11333683	0.034571949	85	530	PTEN	LRP1	57	UCEC	0.120800625	0.923518035	0.069092647	protein_coding	protein_coding
-1.427303647	0.239955054	0.593499865	-2.404892961	0.016177203	85	530	PTEN	LRP1B	57	UCEC	0.074977787	0.767939817	0.069092647	protein_coding	protein_coding
-1.379547497	0.251692419	0.593818281	-2.32318125	0.020169418	85	530	TTN	LRP2	57	UCEC	0.078596247	0.806006344	0.069092647	protein_coding	protein_coding
-1.818227615	0.162313178	0.72017678	-2.524696249	0.011579833	85	530	DST	MUC16	57	UCEC	0.039566436	0.66585648	0.069092647	protein_coding	protein_coding
-1.818213087	0.162315536	0.720109128	-2.524913261	0.011572685	85	530	PTEN	PCDH15	57	UCEC	0.039572257	0.665777868	0.069092647	protein_coding	protein_coding
-1.121812656	0.325688897	0.519046659	-2.161294437	0.030672602	85	530	PTEN	SACS	57	UCEC	0.117755586	0.900791728	0.069092647	protein_coding	protein_coding
-1.897539768	0.149937046	0.720325722	-2.634280174	0.008431588	85	530	TTN	SYNE2	57	UCEC	0.036538887	0.615265527	0.069092647	protein_coding	protein_coding
-1.099739103	0.33295794	0.518926367	-2.119258477	0.034068629	85	530	USP9X	TTN	57	UCEC	0.120412157	0.920679382	0.069092647	protein_coding	protein_coding
-1.043514916	0.352214499	0.519059611	-2.010395132	0.044389385	84	530	TTN	ANK2	57	UCEC	0.12734291	0.974181081	0.069092647	protein_coding	protein_coding
-2.5113379	0.081159583	1.009064772	-2.488777698	0.012818309	84	530	FLG	ARID1A	57	UCEC	0.011230692	0.586506841	0.069092647	protein_coding	protein_coding
-1.117380964	0.327135453	0.51907887	-2.152622711	0.031348342	84	530	FAT4	ARID1A	57	UCEC	0.118271133	0.904849743	0.069092647	protein_coding	protein_coding
-1.786454583	0.167553164	0.72010938	-2.480810045	0.013108421	84	530	PTEN	CHD3	57	UCEC	0.040849162	0.687261651	0.069092647	protein_coding	protein_coding
-1.353179191	0.258417395	0.593519666	-2.27992309	0.02261225	84	530	PTEN	COL6A3	57	UCEC	0.080743506	0.827057841	0.069092647	protein_coding	protein_coding
-1.812811792	0.163194622	0.720270904	-2.516847177	0.011841018	84	530	PTEN	DYNC2H1	57	UCEC	0.039773964	0.669595942	0.069092647	protein_coding	protein_coding
-1.835909441	0.159468409	0.72032501	-2.548723721	0.010811791	84	530	PTEN	GPR98	57	UCEC	0.038861686	0.65437649	0.069092647	protein_coding	protein_coding
-1.484960412	0.226511308	0.593593733	-2.501644356	0.012361803	84	530	PTEN	IGF2R	57	UCEC	0.070764053	0.725048525	0.069092647	protein_coding	protein_coding
-1.41158256	0.243757217	0.593442681	-2.378633365	0.01737695	84	530	MUC16	KMT2D	57	UCEC	0.076174371	0.780020634	0.069092647	protein_coding	protein_coding
-1.409130403	0.244355682	0.593667409	-2.373602426	0.017615507	84	530	PTEN	NIPBL	57	UCEC	0.076327764	0.782280208	0.069092647	protein_coding	protein_coding
-1.906317051	0.148626765	0.720540398	-2.64567685	0.008152766	84	530	PTEN	NRK	57	UCEC	0.036204342	0.610145473	0.069092647	protein_coding	protein_coding
-1.350895951	0.259008098	0.59323219	-2.277179111	0.022775532	84	530	FGFR2	PTEN	57	UCEC	0.080973686	0.828481428	0.069092647	protein_coding	protein_coding
-1.079297946	0.339834024	0.519187251	-2.078822126	0.037633702	84	530	PIK3CA	RYR2	57	UCEC	0.122836023	0.940173418	0.069092647	protein_coding	protein_coding
-1.079705561	0.33969553	0.519137288	-2.079807376	0.037543204	84	530	DST	SYNE1	57	UCEC	0.122797988	0.93969824	0.069092647	protein_coding	protein_coding
-1.164538777	0.312066561	0.519214199	-2.242886999	0.024904102	84	530	ZFHX3	SYNE1	57	UCEC	0.11279327	0.863398488	0.069092647	protein_coding	protein_coding
-1.452830431	0.233907292	0.593695727	-2.447095989	0.014401248	84	530	DNAH5	TTN	57	UCEC	0.073060015	0.748872298	0.069092647	protein_coding	protein_coding
-1.512963585	0.220256262	0.593980036	-2.547162351	0.010860289	84	530	PTEN	UBR4	57	UCEC	0.068757844	0.70556053	0.069092647	protein_coding	protein_coding
-1.803608959	0.164703407	0.720109658	-2.504630981	0.012257921	84	530	MUC16	ZFHX3	57	UCEC	0.040154375	0.67557302	0.069092647	protein_coding	protein_coding
-1.130531243	0.322861693	0.519205766	-2.177424283	0.029448925	83	530	TTN	ABCA13	57	UCEC	0.116696989	0.893250751	0.069092647	protein_coding	protein_coding
-1.091941985	0.3355642	0.518997833	-2.103943245	0.035383398	83	530	TTN	AHNAK	57	UCEC	0.121337697	0.928016068	0.069092647	protein_coding	protein_coding
-1.069070774	0.343327398	0.518879155	-2.060346349	0.039365442	83	530	PTEN	AHNAK	57	UCEC	0.124173696	0.949264667	0.069092647	protein_coding	protein_coding
-1.815953851	0.162682659	0.720566403	-2.520175578	0.011729631	83	530	PTEN	ARHGAP35	57	UCEC	0.03962623	0.667882045	0.069092647	protein_coding	protein_coding
-1.465809523	0.230891004	0.593954233	-2.467882948	0.013591476	83	530	USH2A	ARID1A	57	UCEC	0.072081358	0.739590054	0.069092647	protein_coding	protein_coding
-2.596243585	0.074553105	1.009515276	-2.57177246	0.010117937	83	530	TTN	ATM	57	UCEC	0.010307397	0.539240482	0.069092647	protein_coding	protein_coding
-1.163327716	0.312444722	0.519038084	-2.241314757	0.025005694	83	530	PTEN	CSMD1	57	UCEC	0.112968941	0.864146407	0.069092647	protein_coding	protein_coding
-1.054785351	0.348267175	0.519923403	-2.028732205	0.042485574	83	530	PIK3CA	DST	57	UCEC	0.125702758	0.964895492	0.069092647	protein_coding	protein_coding
-1.383129671	0.250792426	0.593919497	-2.328816745	0.019868776	83	530	PTEN	HERC2	57	UCEC	0.07829967	0.803283597	0.069092647	protein_coding	protein_coding
-1.83499088	0.159614957	0.7202353	-2.547765821	0.010841522	83	530	MUC16	MACF1	57	UCEC	0.038904239	0.654862694	0.069092647	protein_coding	protein_coding
-1.786612639	0.167526683	0.720171478	-2.480815604	0.013108216	83	530	PTEN	NAV3	57	UCEC	0.040837736	0.687236674	0.069092647	protein_coding	protein_coding
-1.804198759	0.164606293	0.720108159	-2.505455237	0.012229388	83	530	TTN	NBEA	57	UCEC	0.040130816	0.675172701	0.069092647	protein_coding	protein_coding
-1.348322357	0.259675538	0.593467788	-2.271938568	0.023090221	83	530	TTN	NSD1	57	UCEC	0.081144869	0.830999994	0.069092647	protein_coding	protein_coding
-1.127191857	0.323941655	0.51893885	-2.172109215	0.029847426	83	530	NF1	PTEN	57	UCEC	0.117148607	0.895769895	0.069092647	protein_coding	protein_coding
-1.520461205	0.218611039	0.594118534	-2.559188308	0.010491689	83	530	MUC17	PTEN	57	UCEC	0.068225729	0.70048041	0.069092647	protein_coding	protein_coding
-1.42052069	0.241588192	0.593395381	-2.393885654	0.016670945	83	530	PTEN	XIST	57	UCEC	0.075503548	0.773008107	0.069092647	protein_coding	none protein_coding
-1.09779891	0.33360457	0.519011646	-2.115172018	0.034415289	83	530	PIK3R1	ZFHX3	57	UCEC	0.120625842	0.922621611	0.069092647	protein_coding	protein_coding
-1.044103826	0.352007138	0.518953909	-2.011939418	0.044226324	82	530	TTN	ARHGAP35	57	UCEC	0.127294308	0.973405858	0.069092647	protein_coding	protein_coding
-2.519119704	0.080530466	1.009215337	-2.496117143	0.012556113	82	530	HUWE1	ARID1A	57	UCEC	0.011140348	0.582132238	0.069092647	protein_coding	protein_coding
-1.858500442	0.155906246	0.720414889	-2.579764066	0.009886784	82	530	TTN	ASPM	57	UCEC	0.037986911	0.639871912	0.069092647	protein_coding	protein_coding
-1.858121768	0.155965294	0.720409576	-2.579257451	0.009901296	82	530	PTEN	ASPM	57	UCEC	0.038001694	0.640107596	0.069092647	protein_coding	protein_coding
-1.11284742	0.328621903	0.519043813	-2.144033686	0.032030188	82	530	TTN	CSMD1	57	UCEC	0.118816702	0.908898778	0.069092647	protein_coding	protein_coding
-1.367798412	0.254667015	0.593698264	-2.303861228	0.021230435	82	530	PTEN	DCHS1	57	UCEC	0.079543836	0.815340212	0.069092647	protein_coding	protein_coding
-1.0368622	0.354565494	0.518871322	-1.998303155	0.045683804	82	530	PTEN	FBXW7	57	UCEC	0.128240228	0.980321785	0.069092647	protein_coding	protein_coding
-1.818777528	0.162223944	0.720286307	-2.525075806	0.011567333	82	530	TTN	GPR98	57	UCEC	0.039536195	0.665633297	0.069092647	protein_coding	protein_coding
-1.170474178	0.310219807	0.520287065	-2.249669954	0.024469904	82	530	PTEN	PRKDC	57	UCEC	0.111890247	0.860095774	0.069092647	protein_coding	protein_coding
-1.25179811	0.285990093	0.593218496	-2.110180514	0.03484281	82	530	TTN	SSPO	57	UCEC	0.089411465	0.914763371	0.069092647	protein_coding	none protein_coding
-1.038265192	0.35406839	0.519380444	-1.999045601	0.04560342	82	530	PTEN	TENM3	57	UCEC	0.127932709	0.979924725	0.069092647	protein_coding	protein_coding
-1.082521254	0.338740398	0.518832657	-2.086455507	0.036937381	82	530	PTEN	UTRN	57	UCEC	0.122525849	0.936496732	0.069092647	protein_coding	protein_coding
-1.057630179	0.347277822	0.518991379	-2.037856932	0.041564243	82	530	OBSCN	ZFHX3	57	UCEC	0.12557485	0.960398404	0.069092647	protein_coding	protein_coding
-2.589172067	0.075082177	1.009210844	-2.565541266	0.010301497	82	530	TTN	ZNF292	57	UCEC	0.01038674	0.542743301	0.069092647	protein_coding	protein_coding
-1.646105931	0.192799222	0.719902022	-2.286569394	0.022220969	81	530	PTEN	BCL11B	57	UCEC	0.047023214	0.790493403	0.069092647	protein_coding	protein_coding
-1.832313218	0.160042925	0.720318003	-2.543755966	0.010966767	81	530	PTEN	CEP290	57	UCEC	0.039002228	0.656724991	0.069092647	protein_coding	protein_coding
-1.763175486	0.171499404	0.720202061	-2.448167786	0.014358477	81	530	SYNE1	FAT1	57	UCEC	0.041803654	0.703575952	0.069092647	protein_coding	protein_coding
-1.42146295	0.24136066	0.593514813	-2.394991528	0.016620749	81	530	TTN	IGF2R	57	UCEC	0.075414781	0.772460877	0.069092647	protein_coding	protein_coding
-1.374495615	0.252967156	0.594489722	-2.31205951	0.020774404	81	530	PIK3CA	MACF1	57	UCEC	0.078890421	0.811155293	0.069092647	protein_coding	protein_coding
-1.411934558	0.24367143	0.593458073	-2.379164801	0.017351916	81	530	TTN	MDN1	57	UCEC	0.076145265	0.779769641	0.069092647	protein_coding	protein_coding
-1.347175408	0.259973544	0.593583071	-2.269565077	0.023233985	81	530	TTN	MKI67	57	UCEC	0.081219637	0.832141659	0.069092647	protein_coding	protein_coding
-1.820147473	0.162001858	0.720243949	-2.527126366	0.011500012	81	530	TTN	PCDH15	57	UCEC	0.039485348	0.664666855	0.069092647	protein_coding	protein_coding
-1.81039201	0.163589995	0.720169039	-2.513843156	0.011942353	81	530	PTEN	SZT2	57	UCEC	0.039878285	0.671084181	0.069092647	protein_coding	protein_coding
-1.771320889	0.170108146	0.720148502	-2.459660588	0.013906847	81	530	TTN	TAF1	57	UCEC	0.041468882	0.697795064	0.069092647	protein_coding	protein_coding
-1.884629127	0.151885379	0.720486363	-2.615773489	0.008902559	81	530	TTN	UBR4	57	UCEC	0.037002034	0.623456767	0.069092647	protein_coding	protein_coding
-2.515551888	0.080818297	1.009254417	-2.492485388	0.012685255	81	530	MUC16	ZFHX4	57	UCEC	0.01117931	0.58425764	0.069092647	protein_coding	protein_coding
-1.384332702	0.250490896	0.593684322	-2.331765638	0.019713024	80	530	TTN	ATRX	57	UCEC	0.078241587	0.801948064	0.069092647	protein_coding	protein_coding
-1.520229099	0.218661786	0.594229541	-2.558319628	0.010517937	80	530	PTEN	DNAH3	57	UCEC	0.06822672	0.700795474	0.069092647	protein_coding	protein_coding
-2.508719335	0.081372383	1.009129633	-2.48602286	0.012917967	80	530	MUC16	FAT1	57	UCEC	0.011258708	0.588119421	0.069092647	protein_coding	protein_coding
-1.351051115	0.258967912	0.593662322	-2.27579057	0.022858547	80	530	TTN	HERC2	57	UCEC	0.080892896	0.829051533	0.069092647	protein_coding	protein_coding
-1.775581238	0.169384968	0.720367655	-2.464826433	0.013707964	80	530	DST	HUWE1	57	UCEC	0.041274853	0.695127057	0.069092647	protein_coding	protein_coding
-1.836505156	0.159373439	0.721038398	-2.547028231	0.010864464	80	530	DST	MACF1	57	UCEC	0.038784274	0.654901854	0.069092647	protein_coding	protein_coding
-1.308192403	0.270308223	0.593507334	-2.204172262	0.027512232	80	530	RYR2	MUC16	57	UCEC	0.084460883	0.865093204	0.069092647	protein_coding	protein_coding
-1.707900711	0.181245881	0.720012396	-2.372043483	0.017690009	80	530	DNAH14	PTEN	57	UCEC	0.044195823	0.743284489	0.069092647	protein_coding	protein_coding
-1.768347684	0.170614665	0.720342836	-2.454869537	0.014093573	80	530	DST	TENM1	57	UCEC	0.041576522	0.700139467	0.069092647	protein_coding	protein_coding
-1.118901421	0.326638436	0.520108981	-2.151282638	0.031453898	80	530	PTEN	TRRAP	57	UCEC	0.117853256	0.905300978	0.069092647	protein_coding	protein_coding
-1.085014288	0.337896958	0.519196951	-2.089793257	0.036636375	80	530	FAT3	TTN	57	UCEC	0.122133532	0.93483217	0.069092647	protein_coding	protein_coding
-1.041517188	0.352918831	0.51904269	-2.006611804	0.044791013	80	530	KMT2C	ZFHX3	57	UCEC	0.127601792	0.976096801	0.069092647	protein_coding	protein_coding
-1.800509199	0.16521474	0.720110011	-2.50032519	0.012407935	80	530	FLG	ZFHX3	57	UCEC	0.040279009	0.677670852	0.069092647	protein_coding	protein_coding
-1.284502613	0.27678822	0.593579274	-2.163995055	0.030464729	79	530	PTEN	APOB	57	UCEC	0.086473438	0.885956668	0.069092647	protein_coding	protein_coding
-1.241437141	0.288968631	0.593484198	-2.09177792	0.036458386	79	530	ASH1L	ARID1A	57	UCEC	0.090295634	0.924771949	0.069092647	protein_coding	protein_coding
-1.042520888	0.352564784	0.519360974	-2.007314644	0.044716171	79	530	PTEN	ARID4B	57	UCEC	0.127394285	0.975726088	0.069092647	protein_coding	protein_coding
-1.317756997	0.26773516	0.59346097	-2.220461098	0.026387484	79	530	PTEN	DNAH9	57	UCEC	0.083664502	0.85678052	0.069092647	protein_coding	protein_coding
-1.713689247	0.180199763	0.720124192	-2.379713481	0.017326104	79	530	TTN	DYNC2H1	57	UCEC	0.043931105	0.739156335	0.069092647	protein_coding	protein_coding
-1.31140183	0.26944208	0.593483885	-2.209667124	0.027128273	79	530	KMT2D	FAT1	57	UCEC	0.084194116	0.862281569	0.069092647	protein_coding	protein_coding
-1.743350104	0.174933373	0.72011492	-2.420933182	0.015480723	79	530	PIK3CA	FAT1	57	UCEC	0.042647981	0.717541236	0.069092647	protein_coding	protein_coding
-2.456629651	0.085723382	1.009097052	-2.434483033	0.014913079	79	530	MUC16	HUWE1	57	UCEC	0.011861471	0.619526731	0.069092647	protein_coding	protein_coding
-2.554176405	0.077756245	1.009329604	-2.530567215	0.011387826	79	530	TTN	KRAS	57	UCEC	0.010754162	0.56220407	0.069092647	protein_coding	protein_coding
-1.798798929	0.165497543	0.720292691	-2.497316649	0.012513716	79	530	PTEN	MGA	57	UCEC	0.040333512	0.679073945	0.069092647	protein_coding	protein_coding
-1.355672634	0.257773849	0.593455258	-2.2843721	0.022349672	79	530	RYR3	MUC16	57	UCEC	0.080552596	0.824894047	0.069092647	protein_coding	protein_coding
-1.312269911	0.269208283	0.594089331	-2.208876416	0.027183238	79	530	PIK3CA	MUC5B	57	UCEC	0.084021295	0.862556329	0.069092647	protein_coding	protein_coding
-1.792987908	0.166462053	0.720413959	-2.488830046	0.012816422	79	530	MUC16	MUC5B	57	UCEC	0.040558931	0.683193912	0.069092647	protein_coding	protein_coding
-1.726215079	0.177956689	0.720050318	-2.397353401	0.016513988	79	530	ZFHX3	MUC5B	57	UCEC	0.043390546	0.729849847	0.069092647	protein_coding	protein_coding
-1.298033051	0.273068377	0.59332275	-2.187735176	0.028688898	79	530	PTEN	NPAP1	57	UCEC	0.085354198	0.873610669	0.069092647	protein_coding	protein_coding
-1.356173163	0.257644858	0.593690303	-2.284310787	0.022353272	79	530	TTN	SACS	57	UCEC	0.080475205	0.824861183	0.069092647	protein_coding	protein_coding
-1.050874469	0.349631873	0.519303537	-2.023622785	0.043008979	79	530	ANK3	SYNE1	57	UCEC	0.126348742	0.967500307	0.069092647	protein_coding	protein_coding
-1.769423267	0.170431254	0.720327913	-2.456413578	0.014033155	79	530	MUC16	TENM1	57	UCEC	0.041533042	0.699366358	0.069092647	protein_coding	protein_coding
-1.024937164	0.358819011	0.518754055	-1.975767041	0.048181168	79	530	NF1	TTN	57	UCEC	0.129808484	0.991854142	0.069092647	protein_coding	protein_coding
-1.051793941	0.349310544	0.518990017	-2.026616903	0.042701607	79	530	RYR2	ZFHX3	57	UCEC	0.126310215	0.966017327	0.069092647	protein_coding	protein_coding
-1.785901239	0.167645904	0.720748976	-2.477840827	0.01321801	78	530	PIK3CA	ANK3	57	UCEC	0.040820567	0.688504623	0.069092647	protein_coding	protein_coding
-2.543159822	0.078617589	1.00952508	-2.519164579	0.011763366	78	530	ATM	ARID1A	57	UCEC	0.010869126	0.568649705	0.069092647	protein_coding	protein_coding
-1.345038388	0.260529706	0.593487263	-2.266330674	0.023431145	78	530	PTEN	BCORL1	57	UCEC	0.081408676	0.833765281	0.069092647	protein_coding	protein_coding
-1.813506473	0.163081293	0.720427784	-2.517263372	0.011827038	78	530	TTN	CACNA1D	57	UCEC	0.039734123	0.669336727	0.069092647	protein_coding	protein_coding
-1.748892428	0.173966517	0.720204026	-2.428329149	0.01516857	78	530	TTN	CEP290	57	UCEC	0.042404859	0.713700025	0.069092647	protein_coding	protein_coding
-1.438088177	0.237381156	0.594257254	-2.419975803	0.01552154	78	530	PTEN	CSMD2	57	UCEC	0.074063504	0.760831049	0.069092647	protein_coding	protein_coding
-1.748786229	0.173984993	0.720157572	-2.428338321	0.015168186	78	530	ZFHX4	DMD	57	UCEC	0.042413224	0.713710837	0.069092647	protein_coding	protein_coding
-1.619491485	0.197999359	0.719877653	-2.249676007	0.02446952	78	530	TTN	DNHD1	57	UCEC	0.04829382	0.811775638	0.069092647	protein_coding	protein_coding
-1.257753869	0.284291867	0.593305907	-2.119907885	0.034013814	78	530	TTN	DOCK3	57	UCEC	0.088865308	0.909487257	0.069092647	protein_coding	protein_coding
-1.042386191	0.352612277	0.520154437	-2.003993652	0.04507074	78	530	PIK3CA	FAT2	57	UCEC	0.127213451	0.977376348	0.069092647	protein_coding	protein_coding
-1.753786392	0.173117211	0.720036926	-2.435689518	0.014863436	78	530	PTEN	FN1	57	UCEC	0.042211661	0.709983167	0.069092647	protein_coding	protein_coding
-1.186035381	0.305429779	0.593395437	-1.99872683	0.045637918	78	530	ZFHX3	KMT2B	57	UCEC	0.095455946	0.977281713	0.069092647	protein_coding	protein_coding
-1.356943705	0.257446408	0.593669679	-2.285688072	0.022272514	78	530	DST	KMT2C	57	UCEC	0.08041647	0.824192522	0.069092647	protein_coding	protein_coding
-1.837297116	0.159247272	0.720329734	-2.550633454	0.010752735	78	530	PTEN	LRRK2	57	UCEC	0.038807436	0.653475107	0.069092647	protein_coding	protein_coding
-1.367568281	0.254725628	0.593830167	-2.302961954	0.021280984	78	530	PIK3R1	MUC16	57	UCEC	0.079541577	0.815738734	0.069092647	protein_coding	protein_coding
-2.56134788	0.077200613	1.009228556	-2.537926482	0.011151141	78	530	PTEN	PCDH19	57	UCEC	0.01067943	0.55807612	0.069092647	protein_coding	protein_coding
-1.024599312	0.35894026	0.519210902	-1.973377886	0.048452525	78	530	PTEN	RNF213	57	UCEC	0.129736128	0.993078123	0.069092647	protein_coding	protein_coding
-1.777346273	0.169086261	0.720321867	-2.467433454	0.013608551	78	530	RYR2	TENM1	57	UCEC	0.041205764	0.693838945	0.069092647	protein_coding	protein_coding
-1.80855343	0.163891045	0.720914854	-2.508692143	0.012117904	78	530	ARID1A	TENM1	57	UCEC	0.039893314	0.673302671	0.069092647	protein_coding	protein_coding
-1.435465689	0.238004502	0.594163273	-2.415944833	0.015694439	78	530	MUC17	TTN	57	UCEC	0.074271669	0.762688434	0.069092647	protein_coding	protein_coding
-1.391266617	0.248760021	0.593754881	-2.343166618	0.019120842	78	530	TTN	XIRP2	57	UCEC	0.077690198	0.796516806	0.069092647	protein_coding	protein_coding
-1.348877994	0.259531293	0.593373688	-2.273235266	0.023012006	78	530	TTN	XIST	57	UCEC	0.081114753	0.83038522	0.069092647	protein_coding	none protein_coding
-2.456242775	0.085756553	1.009221254	-2.433800086	0.014941245	77	530	PTEN	AFF2	57	UCEC	0.011863172	0.61991735	0.069092647	protein_coding	protein_coding
-1.697278153	0.183181438	0.720258653	-2.356484224	0.018448851	77	530	MUC16	ANK2	57	UCEC	0.044646243	0.751584832	0.069092647	protein_coding	protein_coding
-1.057647044	0.347271965	0.519332148	-2.03655223	0.041694934	77	530	DNAH10	ARID1A	57	UCEC	0.12548889	0.961023868	0.069092647	protein_coding	protein_coding
-1.772397002	0.169925189	0.72082565	-2.45884286	0.013938561	77	530	FBN2	ARID1A	57	UCEC	0.041369339	0.697970299	0.069092647	protein_coding	protein_coding
-1.681393732	0.186114402	0.72013812	-2.334821173	0.019552765	77	530	DST	ASH1L	57	UCEC	0.045371803	0.763438265	0.069092647	protein_coding	protein_coding
-2.53457737	0.079295225	1.009313897	-2.511188421	0.012032545	77	530	PTEN	CACNA1D	57	UCEC	0.01096735	0.573313763	0.069092647	protein_coding	protein_coding
-1.763462699	0.171450154	0.720238685	-2.448442072	0.01434755	77	530	MUC16	CACNA1E	57	UCEC	0.041788649	0.703424397	0.069092647	protein_coding	protein_coding
-1.287588232	0.275935474	0.593855572	-2.168184138	0.030144679	77	530	TTN	DOCK11	57	UCEC	0.086160353	0.883705594	0.069092647	protein_coding	protein_coding
-1.347119262	0.259988141	0.593741086	-2.268866505	0.023276445	77	530	RYR3	DST	57	UCEC	0.081199045	0.832446158	0.069092647	protein_coding	protein_coding
-1.733150287	0.176726792	0.720213575	-2.406439348	0.016108879	77	530	DST	FAT1	57	UCEC	0.043076878	0.725037661	0.069092647	protein_coding	protein_coding
-1.788615819	0.167191433	0.720229747	-2.483396203	0.013013625	77	530	ZFHX3	FAT1	57	UCEC	0.040751358	0.685939728	0.069092647	protein_coding	protein_coding
-1.696108495	0.183395823	0.720060885	-2.355507055	0.018497446	77	530	DST	FLG	57	UCEC	0.044715824	0.752172826	0.069092647	protein_coding	protein_coding
-1.036341417	0.354750194	0.519157491	-1.996198523	0.045912318	77	530	FAT4	KMT2D	57	UCEC	0.128235085	0.981382748	0.069092647	protein_coding	protein_coding
-1.30643785	0.27078291	0.593458664	-2.201396539	0.027707964	77	530	TTN	LRP1	57	UCEC	0.084617275	0.866529723	0.069092647	protein_coding	protein_coding
-1.836454262	0.159381551	0.720417993	-2.549151021	0.010798553	77	530	TTN	LRRK2	57	UCEC	0.038833441	0.654139272	0.069092647	protein_coding	protein_coding
-1.302805484	0.271768281	0.593758727	-2.194166461	0.028223445	77	530	ZFHX3	MACF1	57	UCEC	0.084875264	0.87019463	0.069092647	protein_coding	protein_coding
-2.429770192	0.088057067	1.009229397	-2.407549958	0.016059965	77	530	ZFHX4	MACF1	57	UCEC	0.012181221	0.63655747	0.069092647	protein_coding	protein_coding
-1.822010972	0.161700249	0.720572704	-2.528559522	0.011453166	77	530	PTEN	MED13L	57	UCEC	0.039386448	0.663857028	0.069092647	protein_coding	protein_coding
-2.439351238	0.087217416	1.009126537	-2.417289754	0.015636564	77	530	PTEN	MUC4	57	UCEC	0.012067502	0.63036061	0.069092647	protein_coding	protein_coding
-2.438954541	0.087252022	1.009046004	-2.417089538	0.015645168	77	530	MUC16	NEB	57	UCEC	0.012074195	0.630511193	0.069092647	protein_coding	protein_coding
-1.213547958	0.297141163	0.593327978	-2.045324009	0.040822925	77	530	PIK3R1	OBSCN	57	UCEC	0.092877785	0.950634976	0.069092647	protein_coding	protein_coding
-1.262346726	0.282989149	0.594067207	-2.124922418	0.033593087	77	530	PIK3CA	PDE4DIP	57	UCEC	0.088326204	0.90667157	0.069092647	protein_coding	protein_coding
-1.252945145	0.28566224	0.593380591	-2.111537121	0.034726171	77	530	VPS13D	PTEN	57	UCEC	0.089280596	0.914005046	0.069092647	protein_coding	protein_coding
-1.725278875	0.178123371	0.720118099	-2.39582768	0.016582884	77	530	MUC16	RYR1	57	UCEC	0.043425418	0.730630513	0.069092647	protein_coding	protein_coding
-1.721168706	0.178856994	0.720217232	-2.389791065	0.01685796	77	530	ZFHX4	SYNE1	57	UCEC	0.043595799	0.733782269	0.069092647	protein_coding	protein_coding
-1.197954825	0.301810837	0.593466728	-2.018571164	0.043531811	77	530	ASH1L	SYNE1	57	UCEC	0.094311739	0.965837153	0.069092647	protein_coding	protein_coding
-2.452469884	0.086080714	1.009231707	-2.430036498	0.015097302	77	530	SYNE1	TENM1	57	UCEC	0.011907771	0.622273397	0.069092647	protein_coding	protein_coding
-1.776828963	0.169173754	0.720317909	-2.466728843	0.013635357	77	530	PTEN	TG	57	UCEC	0.041227405	0.694192582	0.069092647	protein_coding	protein_coding
-2.39573485	0.091105705	1.009016485	-2.374326767	0.017580984	77	530	DNAH14	TTN	57	UCEC	0.012608209	0.658321057	0.069092647	protein_coding	protein_coding
-2.416402321	0.089242105	1.009337648	-2.394047549	0.016663588	77	530	PIK3CA	ZFHX4	57	UCEC	0.012342532	0.64526091	0.069092647	protein_coding	protein_coding
-2.493136144	0.082650356	1.009333454	-2.470081749	0.013508218	77	530	DST	ZFHX4	57	UCEC	0.011430961	0.597594664	0.069092647	protein_coding	protein_coding
-2.48501126	0.083324616	1.009312526	-2.462083048	0.013813268	76	530	DNAH5	ARID1A	57	UCEC	0.011524687	0.602445117	0.069092647	protein_coding	protein_coding
-2.412463229	0.089594331	1.009273903	-2.390295857	0.016834805	76	530	PDE4DIP	ARID1A	57	UCEC	0.012392794	0.647726734	0.069092647	protein_coding	protein_coding
-1.778364883	0.168914116	0.720713919	-2.46750456	0.013605849	76	530	PCLO	ARID1A	57	UCEC	0.041132194	0.693665377	0.069092647	protein_coding	protein_coding
-1.705692938	0.181646473	0.720195331	-2.368375444	0.017866395	76	530	DMD	ARID1A	57	UCEC	0.044277626	0.74519445	0.069092647	protein_coding	protein_coding
-1.667035375	0.188805976	0.720153215	-2.314834316	0.020622001	76	530	NIPBL	ARID1A	57	UCEC	0.046026605	0.774501972	0.069092647	protein_coding	protein_coding
-2.454968142	0.085865931	1.009126633	-2.432765188	0.014984015	76	530	PTEN	BIRC6	57	UCEC	0.011880506	0.620592916	0.069092647	protein_coding	protein_coding
-1.679519064	0.186463631	0.720189003	-2.332053194	0.019697893	76	530	DST	CSMD3	57	UCEC	0.045452407	0.764947084	0.069092647	protein_coding	protein_coding
-1.313283639	0.268935518	0.593726644	-2.211933139	0.026971285	76	530	TTN	DCHS1	57	UCEC	0.083995852	0.861070052	0.069092647	protein_coding	protein_coding
-1.631798649	0.195577482	0.719876643	-2.266775377	0.023403951	76	530	PTEN	DNHD1	57	UCEC	0.047703197	0.801844621	0.069092647	protein_coding	protein_coding
-1.306816517	0.270680393	0.593859714	-2.200547513	0.027768073	76	530	FAT4	DST	57	UCEC	0.084518777	0.866882811	0.069092647	protein_coding	protein_coding
-2.48148646	0.083618837	1.009348859	-2.458502268	0.01395179	76	530	PTEN	GPR112	57	UCEC	0.011564558	0.604615418	0.069092647	protein_coding	protein_coding
-1.31834713	0.267577207	0.593781431	-2.220256581	0.026401355	76	530	DST	HMCN1	57	UCEC	0.083562641	0.856813053	0.069092647	protein_coding	protein_coding
-1.26048769	0.283515725	0.593846649	-2.122581128	0.033788968	76	530	MACF1	HUWE1	57	UCEC	0.088528821	0.90796608	0.069092647	protein_coding	protein_coding
-1.75324218	0.173211449	0.720449431	-2.433539546	0.014952002	76	530	RYR2	HUWE1	57	UCEC	0.042200506	0.710944226	0.069092647	protein_coding	protein_coding
-1.246428995	0.287529736	0.593375635	-2.100573265	0.035678443	76	530	TTN	KIAA1109	57	UCEC	0.089865134	0.919971351	0.069092647	protein_coding	protein_coding
-1.230633388	0.292107502	0.593382506	-2.073929339	0.038085874	76	530	PTEN	KIAA1109	57	UCEC	0.091294649	0.934630816	0.069092647	protein_coding	protein_coding
-1.746619163	0.174362439	0.720226365	-2.425097509	0.015304276	76	530	FLG	KMT2D	57	UCEC	0.042499506	0.715355621	0.069092647	protein_coding	protein_coding
-2.411941151	0.089641119	1.009055413	-2.390296033	0.016834797	76	530	ARID1A	MED12	57	UCEC	0.012404577	0.647787517	0.069092647	protein_coding	protein_coding
-1.616238821	0.198644433	0.720075987	-2.244539257	0.024797726	76	530	TTN	MUC4	57	UCEC	0.048432328	0.814737025	0.069092647	protein_coding	protein_coding
-1.23308643	0.291391828	0.593400207	-2.078001347	0.037709235	76	530	KMT2D	MUC5B	57	UCEC	0.091067814	0.932373285	0.069092647	protein_coding	protein_coding
-1.791065897	0.166782302	0.720358637	-2.486353056	0.012905986	76	530	DST	NEB	57	UCEC	0.040641368	0.684434062	0.069092647	protein_coding	protein_coding
-1.236648491	0.290355719	0.593595554	-2.083318317	0.037222218	76	530	TTN	NHS	57	UCEC	0.090709265	0.929413809	0.069092647	protein_coding	protein_coding
-1.255231113	0.285009971	0.593607189	-2.114582062	0.034465584	76	530	TTN	NIPBL	57	UCEC	0.089037184	0.912323148	0.069092647	protein_coding	protein_coding
-1.689563464	0.184600091	0.720269844	-2.34573678	0.018989513	76	530	PTEN	PCDH9	57	UCEC	0.04499102	0.757422111	0.069092647	protein_coding	protein_coding
-1.320030764	0.267127084	0.593573333	-2.223871408	0.026157097	76	530	PCLO	SYNE1	57	UCEC	0.083456103	0.855022896	0.069092647	protein_coding	protein_coding
-2.476873918	0.084005423	1.009436041	-2.453720509	0.014138682	76	530	ZFHX4	TENM1	57	UCEC	0.011616038	0.607514475	0.069092647	protein_coding	protein_coding
-2.450426334	0.086256804	1.009312576	-2.427817102	0.015190001	76	530	ZFHX3	TENM1	57	UCEC	0.011930239	0.623645186	0.069092647	protein_coding	protein_coding
-1.332479639	0.263822266	0.593919748	-2.243534825	0.024862347	76	530	ARID1A	TNRC6B	57	UCEC	0.082367664	0.845018353	0.069092647	protein_coding	protein_coding
-1.034192794	0.355513237	0.519310074	-1.991474548	0.046428741	76	530	TTN	TRRAP	57	UCEC	0.128472483	0.983787806	0.069092647	protein_coding	protein_coding
-1.769263537	0.170458479	0.720373732	-2.456035607	0.014047924	76	530	PCLO	ZFHX3	57	UCEC	0.041535946	0.699540896	0.069092647	protein_coding	protein_coding
-2.424649743	0.088509115	1.009144064	-2.402679489	0.016275445	76	530	ZFHX3	ZFHX4	57	UCEC	0.012245802	0.639718286	0.069092647	protein_coding	protein_coding
-1.742819855	0.175026156	0.720274347	-2.41966115	0.015534976	75	530	TTN	ABCA12	57	UCEC	0.042657269	0.718146182	0.069092647	protein_coding	protein_coding
-2.413220412	0.089526518	1.009074538	-2.391518488	0.016778839	75	530	PTEN	ADGB	57	UCEC	0.012388254	0.646983609	0.069092647	protein_coding	protein_coding
-2.546987303	0.078317257	1.009451508	-2.523139826	0.011631214	75	530	PTEN	APC	57	UCEC	0.010829166	0.56639569	0.069092647	protein_coding	protein_coding
-1.795647192	0.166019971	0.72070781	-2.49150511	0.012720314	75	530	UBR4	ARID1A	57	UCEC	0.040427926	0.681772071	0.069092647	protein_coding	protein_coding
-1.74185401	0.175195286	0.720364694	-2.41801691	0.015605352	75	530	HMCN1	ARID1A	57	UCEC	0.042690929	0.718967438	0.069092647	protein_coding	protein_coding
-2.358818457	0.094531851	1.009172883	-2.337377962	0.01941954	75	530	TAF1	ARID1A	57	UCEC	0.013078347	0.683287476	0.069092647	protein_coding	protein_coding
-2.503815138	0.08177243	1.00999385	-2.479039983	0.013173654	75	530	DST	ATM	57	UCEC	0.01129491	0.5920127	0.069092647	protein_coding	protein_coding
-1.312973676	0.269018891	0.593593105	-2.211908572	0.026972983	75	530	PTEN	CACNA1C	57	UCEC	0.084043886	0.861111579	0.069092647	protein_coding	protein_coding
-1.665239491	0.189145354	0.720063693	-2.312628047	0.020743098	75	530	PTEN	CIT	57	UCEC	0.046117429	0.775758007	0.069092647	protein_coding	protein_coding
-1.727833616	0.177668892	0.720303679	-2.398757174	0.01645082	75	530	TTN	COL6A3	57	UCEC	0.043298866	0.72903145	0.069092647	protein_coding	protein_coding
-1.637594082	0.194447304	0.720160425	-2.273929565	0.022970222	75	530	FAT4	CSMD3	57	UCEC	0.047401163	0.797654567	0.069092647	protein_coding	protein_coding
-1.267918381	0.281416815	0.593435344	-2.136573756	0.032632676	75	530	ZFHX3	DMD	57	UCEC	0.087944297	0.900518016	0.069092647	protein_coding	protein_coding
-1.840911784	0.158672685	0.720580713	-2.55476139	0.010626061	75	530	TTN	DNAH3	57	UCEC	0.038648397	0.651437652	0.069092647	protein_coding	protein_coding
-1.596182333	0.202668765	0.720088788	-2.216646559	0.026647253	75	530	ASH1L	FAT1	57	UCEC	0.049412277	0.831263614	0.069092647	protein_coding	protein_coding
-1.756998551	0.172562023	0.720895049	-2.437245967	0.014799609	75	530	TTN	FBN2	57	UCEC	0.042005578	0.708897555	0.069092647	protein_coding	protein_coding
-1.623981464	0.197112339	0.719975917	-2.255605257	0.024095364	75	530	PTEN	FCGBP	57	UCEC	0.048068209	0.808294614	0.069092647	protein_coding	protein_coding
-2.440956964	0.087077482	1.009063128	-2.419032959	0.01556183	75	530	MUC16	FLG	57	UCEC	0.012049638	0.629271024	0.069092647	protein_coding	protein_coding
-2.48762908	0.083106773	1.009364342	-2.464550188	0.013718535	75	530	TTN	GPR112	57	UCEC	0.01149339	0.600931115	0.069092647	protein_coding	protein_coding
-1.763342194	0.171470816	0.720247277	-2.448245553	0.014355378	75	530	ZFHX3	HMCN1	57	UCEC	0.041792982	0.703521015	0.069092647	protein_coding	protein_coding
-1.614265914	0.199036727	0.720311739	-2.241065676	0.025021821	75	530	OBSCN	HUWE1	57	UCEC	0.048505556	0.816723311	0.069092647	protein_coding	protein_coding
-1.246467171	0.287518759	0.593747036	-2.09932361	0.035788384	75	530	PIK3CA	HUWE1	57	UCEC	0.089796313	0.920606138	0.069092647	protein_coding	protein_coding
-1.720660227	0.178947963	0.720324537	-2.388729159	0.016906761	75	530	PTEN	HYDIN	57	UCEC	0.0436088	0.734309899	0.069092647	protein_coding	protein_coding
-1.2494617	0.286659064	0.593578563	-2.104964324	0.035294414	75	530	DMD	KMT2D	57	UCEC	0.089557385	0.917550449	0.069092647	protein_coding	protein_coding
-1.227181309	0.293117622	0.593478416	-2.06777749	0.038660951	75	530	OBSCN	MUC16	57	UCEC	0.091593131	0.93803913	0.069092647	protein_coding	protein_coding
-2.431489205	0.087905825	1.009191196	-2.409344448	0.015981207	75	530	DNAH5	MUC16	57	UCEC	0.012161209	0.635416582	0.069092647	protein_coding	protein_coding
-1.345044309	0.260528164	0.593701028	-2.26552464	0.023480504	75	530	FAT4	MUC16	57	UCEC	0.081374093	0.834109748	0.069092647	protein_coding	protein_coding
-1.721686513	0.178764405	0.720705314	-2.388891105	0.016899311	75	530	DST	MUC5B	57	UCEC	0.043531567	0.734104347	0.069092647	protein_coding	protein_coding
-1.662266335	0.189708549	0.720255405	-2.30788457	0.021005557	75	530	PIK3CA	NEB	57	UCEC	0.04623737	0.778360308	0.069092647	protein_coding	protein_coding
-1.812893242	0.16318133	0.720570573	-2.515913514	0.011872431	75	530	PTEN	NFASC	57	UCEC	0.039747372	0.669934777	0.069092647	protein_coding	protein_coding
-1.709743659	0.180912162	0.720235857	-2.37386634	0.017602921	75	530	PTEN	NHS	57	UCEC	0.04409513	0.742240935	0.069092647	protein_coding	protein_coding
-2.417760916	0.089120943	1.009047004	-2.396083538	0.016571313	75	530	TTN	PCDH19	57	UCEC	0.012332798	0.644017881	0.069092647	protein_coding	protein_coding
-1.738590335	0.175768	0.720379839	-2.413435579	0.015802921	75	530	DST	PCLO	57	UCEC	0.042829215	0.72133916	0.069092647	protein_coding	protein_coding
-1.752306923	0.173373522	0.720161805	-2.4332128	0.014965503	75	530	PTEN	POLE	57	UCEC	0.042263812	0.7112084	0.069092647	protein_coding	protein_coding
-1.351178854	0.258934834	0.593501041	-2.276624236	0.022808674	75	530	PTEN	PTPRD	57	UCEC	0.080908136	0.828683639	0.069092647	protein_coding	protein_coding
-2.445885292	0.086649391	1.009370947	-2.423177821	0.015385394	75	530	DST	USH2A	57	UCEC	0.011983167	0.626555303	0.069092647	protein_coding	protein_coding
-1.274824056	0.279480137	0.593796265	-2.146904807	0.031800861	75	530	TTN	USP34	57	UCEC	0.087277312	0.894953626	0.069092647	protein_coding	protein_coding
-1.666969337	0.188818444	0.720092389	-2.314938142	0.020616318	75	530	PTEN	VPS13A	57	UCEC	0.046035133	0.774460784	0.069092647	protein_coding	protein_coding
-1.709656375	0.180927953	0.720106432	-2.374171787	0.017588365	75	530	NEB	ZFHX3	57	UCEC	0.044110167	0.742117444	0.069092647	protein_coding	protein_coding
-1.387966579	0.249582295	0.594244391	-2.335683096	0.019507764	74	530	DST	ANK3	57	UCEC	0.077872252	0.799916787	0.069092647	protein_coding	protein_coding
-1.262257213	0.283014481	0.59352903	-2.126698357	0.033445154	74	530	LRP1B	ARID1A	57	UCEC	0.088427337	0.90579677	0.069092647	protein_coding	protein_coding
-1.275180837	0.279380441	0.594324713	-2.145596184	0.03190521	74	530	FAT2	ARID1A	57	UCEC	0.08715586	0.895561486	0.069092647	protein_coding	protein_coding
-1.748897996	0.173965549	0.720543378	-2.427193212	0.01521615	74	530	SYNE2	ARID1A	57	UCEC	0.042376428	0.71417091	0.069092647	protein_coding	protein_coding
-2.450774788	0.086226753	1.009206992	-2.428416379	0.015164922	74	530	PTEN	BRCA2	57	UCEC	0.011928551	0.62329891	0.069092647	protein_coding	protein_coding
-1.674323326	0.187434969	0.720123643	-2.325049793	0.020069298	74	530	PTEN	CDH23	57	UCEC	0.045695033	0.768833393	0.069092647	protein_coding	protein_coding
-2.429352926	0.088093817	1.009641442	-2.406154131	0.016121461	74	530	TTN	CEP350	57	UCEC	0.012176467	0.63733765	0.069092647	protein_coding	protein_coding
-1.253858316	0.285401501	0.593645541	-2.112132962	0.034675046	74	530	MUC16	CSMD3	57	UCEC	0.089152796	0.913645119	0.069092647	protein_coding	protein_coding
-1.714594258	0.180036754	0.72017605	-2.380798774	0.017275146	74	530	DST	DNAH7	57	UCEC	0.043886904	0.738562759	0.069092647	protein_coding	protein_coding
-1.661644704	0.189826515	0.72018886	-2.307234665	0.021041742	74	530	TTN	DNAH9	57	UCEC	0.046272157	0.778742735	0.069092647	protein_coding	protein_coding
-1.240108091	0.28935294	0.593429998	-2.089729363	0.036642118	74	530	PIK3R1	DST	57	UCEC	0.090425327	0.925903468	0.069092647	protein_coding	protein_coding
-1.277240536	0.278805594	0.593500642	-2.152045755	0.031393751	74	530	PTEN	EYS	57	UCEC	0.087117126	0.892276445	0.069092647	protein_coding	protein_coding
-1.742736164	0.175040804	0.720306658	-2.419436423	0.015544578	74	530	PTEN	FAM135B	57	UCEC	0.042658138	0.718251772	0.069092647	protein_coding	protein_coding
-2.424558794	0.088517165	1.009184865	-2.402492226	0.016283781	74	530	MUC5B	FAT1	57	UCEC	0.012245936	0.639827636	0.069092647	protein_coding	protein_coding
-1.287871866	0.27585722	0.594255385	-2.167202685	0.030219403	74	530	DST	FAT2	57	UCEC	0.086068446	0.884147557	0.069092647	protein_coding	protein_coding
-1.342906349	0.261085758	0.59366382	-2.262065337	0.023693367	74	530	TTN	HECTD4	57	UCEC	0.081554201	0.83583399	0.069092647	protein_coding	protein_coding
-1.348502537	0.259628754	0.593641551	-2.271577073	0.023112067	74	530	PTEN	HECTD4	57	UCEC	0.081102623	0.831133293	0.069092647	protein_coding	protein_coding
-1.728783381	0.177500229	0.720404375	-2.399740257	0.016406709	74	530	ZFHX3	HUWE1	57	UCEC	0.043249225	0.728483134	0.069092647	protein_coding	protein_coding
-1.725494439	0.178084978	0.720261453	-2.395650125	0.016590919	74	530	MUC16	KMT2C	57	UCEC	0.043403861	0.730678304	0.069092647	protein_coding	protein_coding
-1.256112751	0.284758806	0.593627271	-2.115995698	0.034345173	74	530	HUWE1	KMT2D	57	UCEC	0.088955218	0.911555042	0.069092647	protein_coding	protein_coding
-2.420464293	0.088880341	1.009173582	-2.398461807	0.016464093	74	530	ZFHX4	KMT2D	57	UCEC	0.012296452	0.642438574	0.069092647	protein_coding	protein_coding
-1.26936664	0.281009546	0.593510181	-2.138744507	0.032456366	74	530	DST	MDN1	57	UCEC	0.087804143	0.899346685	0.069092647	protein_coding	protein_coding
-1.749010531	0.173945972	0.720500526	-2.42749376	0.015203548	74	530	PTEN	MED12L	57	UCEC	0.042375218	0.714030572	0.069092647	protein_coding	protein_coding
-1.757454726	0.172483323	0.720453274	-2.439373642	0.014712747	74	530	TTN	MED13L	57	UCEC	0.042022792	0.707960973	0.069092647	protein_coding	protein_coding
-1.273320147	0.279900766	0.593741777	-2.144568895	0.031987332	74	530	TTN	MGA	57	UCEC	0.087418003	0.896204851	0.069092647	protein_coding	protein_coding
-1.667527306	0.188713119	0.720291994	-2.315071277	0.020609032	74	530	OBSCN	NEB	57	UCEC	0.045991457	0.774331658	0.069092647	protein_coding	protein_coding
-2.476854025	0.084007095	1.009324718	-2.453971434	0.01412882	74	530	TTN	NRK	57	UCEC	0.011618804	0.607394016	0.069092647	protein_coding	protein_coding
-1.735244383	0.176357096	0.720213759	-2.40934634	0.015981124	74	530	TTN	POLE	57	UCEC	0.04298675	0.723521211	0.069092647	protein_coding	protein_coding
-2.363003631	0.094137045	1.009101904	-2.341689795	0.019196663	74	530	PTEN	RANBP2	57	UCEC	0.013025538	0.68033912	0.069092647	protein_coding	protein_coding
-1.353540593	0.258324019	0.593604906	-2.280204526	0.022595561	74	530	PTEN	SCN1A	57	UCEC	0.080700847	0.826897133	0.069092647	protein_coding	protein_coding
-1.657244108	0.190663705	0.720226127	-2.301005263	0.021391334	74	530	PTEN	SI	57	UCEC	0.046472836	0.782234353	0.069092647	protein_coding	protein_coding
-1.302514016	0.271847504	0.593868853	-2.193268784	0.028288019	74	530	PTEN	SVEP1	57	UCEC	0.084881682	0.870636205	0.069092647	protein_coding	protein_coding
-1.684211873	0.185590643	0.720447095	-2.337731508	0.019401181	74	530	PDE4DIP	SYNE1	57	UCEC	0.045216728	0.761750985	0.069092647	protein_coding	protein_coding
-1.71730385	0.179549589	0.720449473	-2.383656196	0.017141608	74	530	HUWE1	SYNE1	57	UCEC	0.0437447	0.736959101	0.069092647	protein_coding	protein_coding
-1.69970441	0.182737531	0.720450381	-2.359224804	0.018313158	74	530	MACF1	SYNE1	57	UCEC	0.044521318	0.750045309	0.069092647	protein_coding	protein_coding
-1.671464788	0.187971525	0.720182573	-2.320890357	0.020292762	74	530	FLG	SYNE1	57	UCEC	0.045820549	0.771123339	0.069092647	protein_coding	protein_coding
-1.26169546	0.28317351	0.593822989	-2.124699587	0.033611688	74	530	KMT2D	TENM1	57	UCEC	0.088426063	0.906828075	0.069092647	protein_coding	protein_coding
-1.352525156	0.258586464	0.594024461	-2.276884613	0.022793117	74	530	PTEN	XIRP2	57	UCEC	0.080716433	0.828418173	0.069092647	protein_coding	protein_coding
-2.411223135	0.089705506	1.009325122	-2.388945922	0.016896789	74	530	CSMD3	ZFHX4	57	UCEC	0.012406926	0.648595583	0.069092647	protein_coding	protein_coding
-1.354586754	0.258053912	0.593934184	-2.280701785	0.0225661	74	530	PCLO	ZFHX4	57	UCEC	0.080564453	0.826565799	0.069092647	protein_coding	protein_coding
-1.722990357	0.178531476	0.720200602	-2.392375615	0.016739701	73	530	PTEN	ABCA12	57	UCEC	0.043517874	0.732422916	0.069092647	protein_coding	protein_coding
-2.360076101	0.094413038	1.009301931	-2.338325161	0.019370387	73	530	TTN	AFF2	57	UCEC	0.013058606	0.682601315	0.069092647	protein_coding	protein_coding
-2.489662879	0.082937922	1.009520989	-2.466182383	0.013656178	73	530	MACF1	ANK3	57	UCEC	0.011466517	0.59989434	0.069092647	protein_coding	protein_coding
-1.366594606	0.254973769	0.594044819	-2.300490742	0.021420433	73	530	RYR2	ANK3	57	UCEC	0.079585573	0.816876988	0.069092647	protein_coding	protein_coding
-1.753519079	0.173163494	0.720365205	-2.434208462	0.014924397	73	530	CACNA1E	ARID1A	57	UCEC	0.042195788	0.710630073	0.069092647	protein_coding	protein_coding
-2.41398031	0.089458512	1.009127549	-2.39214588	0.016750183	73	530	NEB	ARID1A	57	UCEC	0.012377558	0.64655933	0.069092647	protein_coding	protein_coding
-1.590918826	0.203738326	0.720161363	-2.209114384	0.027166686	73	530	SSPO	ARID1A	57	UCEC	0.049665979	0.835769389	0.069092647	none protein_coding	protein_coding
-2.476350232	0.084049427	1.009163224	-2.453864918	0.014133006	73	530	CHD4	ARID1A	57	UCEC	0.011628339	0.60750777	0.069092647	protein_coding	protein_coding
-2.27504705	0.102792072	1.009089603	-2.254554049	0.024161334	73	530	PDE4DIP	ASH1L	57	UCEC	0.014223458	0.742872071	0.069092647	protein_coding	protein_coding
-1.521125594	0.218465845	0.719876874	-2.113035783	0.034597705	73	530	TTN	BCL11B	57	UCEC	0.05328586	0.895684614	0.069092647	protein_coding	protein_coding
-1.208932172	0.298515873	0.593395319	-2.037313293	0.041618657	73	530	TTN	BCORL1	57	UCEC	0.093295165	0.955159109	0.069092647	protein_coding	protein_coding
-2.370599555	0.093424696	1.009095672	-2.349231715	0.018812196	73	530	TTN	BIRC6	57	UCEC	0.01292713	0.675182646	0.069092647	protein_coding	protein_coding
-2.485388067	0.083293225	1.009318703	-2.462441307	0.013799476	73	530	TTN	BRCA2	57	UCEC	0.011520206	0.602225446	0.069092647	protein_coding	protein_coding
-1.701689599	0.182375123	0.720784796	-2.360884427	0.018231411	73	530	PTEN	CEP350	57	UCEC	0.044403908	0.749048608	0.069092647	protein_coding	protein_coding
-1.700526602	0.182587348	0.720294748	-2.360876026	0.018231824	73	530	TTN	CHD3	57	UCEC	0.044498299	0.749200309	0.069092647	protein_coding	protein_coding
-1.262855881	0.2828451	0.593789466	-2.126773804	0.033438882	73	530	MUC16	CSMD1	57	UCEC	0.088329315	0.905716869	0.069092647	protein_coding	protein_coding
-2.378700603	0.092670916	1.008981524	-2.357526423	0.018397146	73	530	ZFHX3	CTCF	57	UCEC	0.012825699	0.669585231	0.069092647	protein_coding	protein_coding
-1.602506244	0.20139115	0.720095879	-2.225406771	0.026053943	73	530	PTEN	DLG2	57	UCEC	0.049100102	0.826034844	0.069092647	protein_coding	protein_coding
-1.203548813	0.300127224	0.593485742	-2.027932145	0.042567174	73	530	MUC16	DMD	57	UCEC	0.093782138	0.960485148	0.069092647	protein_coding	protein_coding
-1.19999236	0.301196513	0.593497879	-2.021898312	0.043186858	73	530	SYNE1	DMD	57	UCEC	0.094114025	0.963930081	0.069092647	protein_coding	protein_coding
-1.227419677	0.293047761	0.59378577	-2.067108607	0.038723921	73	530	RYR2	DMD	57	UCEC	0.091516153	0.938380683	0.069092647	protein_coding	protein_coding
-1.290140064	0.27523223	0.594162135	-2.171360286	0.029903948	73	530	PTEN	DOCK11	57	UCEC	0.085889143	0.881983193	0.069092647	protein_coding	protein_coding
-1.173724567	0.309213109	0.593982293	-1.976026191	0.048151811	73	530	PTEN	EP300	57	UCEC	0.096527256	0.990525891	0.069092647	protein_coding	protein_coding
-1.672622095	0.187754111	0.720252807	-2.322270845	0.020218356	73	530	RYR2	FAT1	57	UCEC	0.045761251	0.770337465	0.069092647	protein_coding	protein_coding
-1.184025736	0.306044202	0.593332659	-1.995551262	0.045982789	73	530	PTEN	FUT9	57	UCEC	0.095659741	0.979127192	0.069092647	protein_coding	protein_coding
-1.670719943	0.188111587	0.720347055	-2.319326402	0.020377345	73	530	PIK3CA	GPR98	57	UCEC	0.04583991	0.771946744	0.069092647	protein_coding	protein_coding
-1.73560209	0.176294023	0.720620525	-2.408482731	0.016018984	73	530	RYR2	HMCN1	57	UCEC	0.04293713	0.723839308	0.069092647	protein_coding	protein_coding
-2.417496997	0.089144467	1.009240525	-2.395362589	0.016603937	73	530	ZFHX4	HMCN1	57	UCEC	0.012331375	0.64443226	0.069092647	protein_coding	protein_coding
-1.257085241	0.284482016	0.593831624	-2.11690518	0.034267896	73	530	RYR3	HUWE1	57	UCEC	0.088833165	0.91103382	0.069092647	protein_coding	protein_coding
-1.70662459	0.18147732	0.720219383	-2.369589921	0.017807824	73	530	ARID1A	IGF2R	57	UCEC	0.044234309	0.744535608	0.069092647	protein_coding	protein_coding
-1.642229987	0.193547951	0.720931889	-2.277926685	0.022730946	73	530	MUC5B	KMT2B	57	UCEC	0.047110636	0.795166712	0.069092647	protein_coding	protein_coding
-1.672685361	0.187742232	0.720130875	-2.322751905	0.020192484	73	530	NEB	KMT2D	57	UCEC	0.045769293	0.770104664	0.069092647	protein_coding	protein_coding
-1.686296463	0.185204166	0.720090609	-2.341783717	0.019191833	73	530	PTEN	MGAM	57	UCEC	0.045154106	0.75963375	0.069092647	protein_coding	protein_coding
-1.243276103	0.288437717	0.593481366	-2.094886501	0.036181083	73	530	USP9X	MUC16	57	UCEC	0.090130237	0.923067769	0.069092647	protein_coding	protein_coding
-2.348556176	0.095506958	1.009087898	-2.327404957	0.019943722	73	530	TTN	NAV3	57	UCEC	0.013215453	0.690220688	0.069092647	protein_coding	protein_coding
-1.661438709	0.189865622	0.720166963	-2.307018781	0.021053773	73	530	DNAH5	OBSCN	57	UCEC	0.046283676	0.77886974	0.069092647	protein_coding	protein_coding
-2.436624507	0.087455559	1.009271158	-2.414241691	0.015767999	73	530	ZFHX3	PDE4DIP	57	UCEC	0.012097022	0.632260973	0.069092647	protein_coding	protein_coding
-1.588558028	0.204219879	0.720163599	-2.205829384	0.027395948	73	530	PTEN	PXDN	57	UCEC	0.049783151	0.837748474	0.069092647	protein_coding	protein_coding
-1.1712182	0.309989083	0.593376128	-1.973820895	0.048402112	73	530	PTEN	RBFOX1	57	UCEC	0.096884531	0.991832547	0.069092647	protein_coding	protein_coding
-1.667346596	0.188747225	0.720150178	-2.315276238	0.020597819	73	530	PTEN	REV3L	57	UCEC	0.046012557	0.77425636	0.069092647	protein_coding	protein_coding
-1.655059433	0.191080699	0.720237243	-2.297936477	0.021565405	73	530	MUC16	SYNE1	57	UCEC	0.04657346	0.783962229	0.069092647	protein_coding	protein_coding
-1.252070823	0.28591211	0.593551704	-2.10945536	0.034905295	73	530	ATRX	SYNE1	57	UCEC	0.089328726	0.91511139	0.069092647	protein_coding	protein_coding
-1.267461064	0.281545541	0.593781678	-2.134557383	0.032797182	73	530	KMT2C	SYNE1	57	UCEC	0.08792482	0.901541705	0.069092647	protein_coding	protein_coding
-1.657408378	0.190632388	0.720286829	-2.301039407	0.021389404	73	530	CSMD3	SYNE1	57	UCEC	0.046459674	0.782198923	0.069092647	protein_coding	protein_coding
-2.440476888	0.087119295	1.009359464	-2.417847135	0.015612634	73	530	SYNE1	SYNE2	57	UCEC	0.012048424	0.629938969	0.069092647	protein_coding	protein_coding
-1.675406635	0.187232029	0.720298166	-2.325990421	0.020019062	73	530	TTN	SZT2	57	UCEC	0.045629947	0.768263712	0.069092647	protein_coding	protein_coding
-1.640135315	0.193953796	0.720470995	-2.276476536	0.022817503	73	530	PIK3CA	TENM1	57	UCEC	0.047252087	0.796114575	0.069092647	protein_coding	protein_coding
-1.656389892	0.190826643	0.720049193	-2.300384348	0.021426455	73	530	PTEN	TENM4	57	UCEC	0.046528683	0.782631379	0.069092647	protein_coding	protein_coding
-1.251560189	0.286058144	0.594055556	-2.106806637	0.035134344	73	530	ARID1A	TRRAP	57	UCEC	0.089286134	0.916483424	0.069092647	protein_coding	protein_coding
-1.607592704	0.200369382	0.720038244	-2.232649054	0.025572097	73	530	NAV1	TTN	57	UCEC	0.048856509	0.821751085	0.069092647	protein_coding	protein_coding
-1.723925129	0.178364668	0.720363999	-2.3931306	0.016705294	73	530	MUC16	USH2A	57	UCEC	0.043463292	0.731972971	0.069092647	protein_coding	protein_coding
-1.214671627	0.296807462	0.593782704	-2.045650065	0.040790812	73	530	SYNE1	USH2A	57	UCEC	0.092690831	0.950414069	0.069092647	protein_coding	protein_coding
-1.729098835	0.177444245	0.720276521	-2.400604191	0.01636803	73	530	PTEN	VPS13B	57	UCEC	0.04324642	0.728070894	0.069092647	protein_coding	protein_coding
-2.338789804	0.096444284	1.009111233	-2.317672946	0.020467102	73	530	OBSCN	ZFHX4	57	UCEC	0.013344542	0.697026543	0.069092647	protein_coding	protein_coding
-1.351842221	0.258763122	0.593971253	-2.275938802	0.022849673	72	530	MUC16	ABCA13	57	UCEC	0.080779999	0.828897673	0.069092647	protein_coding	protein_coding
-1.582345225	0.205492606	0.720056186	-2.197530215	0.027982601	72	530	AHNAK2	ARID1A	57	UCEC	0.050103954	0.842791991	0.069092647	protein_coding	protein_coding
-2.34182349	0.096152146	1.009224288	-2.320419274	0.020318207	72	530	SZT2	ARID1A	57	UCEC	0.013301172	0.695069189	0.069092647	protein_coding	protein_coding
-1.178121463	0.307856516	0.593547988	-1.984879887	0.047157837	72	530	LRP1	ARID1A	57	UCEC	0.09618561	0.985341096	0.069092647	protein_coding	protein_coding
-1.284449676	0.276802873	0.593802887	-2.163090993	0.030534182	72	530	RYR1	ARID1A	57	UCEC	0.086440122	0.886391974	0.069092647	protein_coding	protein_coding
-1.319776178	0.267195099	0.594022023	-2.221763045	0.026299323	72	530	ABCA13	ARID1A	57	UCEC	0.083403972	0.855993057	0.069092647	protein_coding	protein_coding
-1.247901797	0.287106573	0.593686315	-2.101954797	0.035557236	72	530	USP9X	ARID1A	57	UCEC	0.089678254	0.919176958	0.069092647	protein_coding	protein_coding
-2.305988628	0.099660225	1.009111209	-2.285167984	0.02230298	72	530	ZFHX4	ASH1L	57	UCEC	0.013789517	0.720268905	0.069092647	protein_coding	protein_coding
-1.601145242	0.20166543	0.720306502	-2.222866567	0.026224799	72	530	MUC16	ASH1L	57	UCEC	0.04914668	0.827501385	0.069092647	protein_coding	protein_coding
-2.335635806	0.096748949	1.009065822	-2.314651587	0.020632007	72	530	NEB	ASH1L	57	UCEC	0.013387889	0.699166201	0.069092647	protein_coding	protein_coding
-1.271090286	0.280525602	0.593702757	-2.14095399	0.032277749	72	530	PTEN	BAZ2B	57	UCEC	0.087619852	0.898136801	0.069092647	protein_coding	protein_coding
-2.41676768	0.089209506	1.009133484	-2.394893954	0.016625173	72	530	DST	CACNA1E	57	UCEC	0.012342961	0.64476714	0.069092647	protein_coding	protein_coding
-1.661020567	0.18994503	0.720170484	-2.306426886	0.021086791	72	530	TTN	CHD7	57	UCEC	0.046302713	0.779200864	0.069092647	protein_coding	protein_coding
-1.706590841	0.181483445	0.720245907	-2.369455799	0.017814284	72	530	PTEN	CHD7	57	UCEC	0.044233502	0.744599444	0.069092647	protein_coding	protein_coding
-1.233417847	0.291295272	0.593859282	-2.07695305	0.037805893	72	530	PTEN	DNAH1	57	UCEC	0.09095576	0.932903369	0.069092647	protein_coding	protein_coding
-1.286880432	0.27613085	0.593879802	-2.166903856	0.030242186	72	530	MUC16	DNAH10	57	UCEC	0.086217264	0.8843733	0.069092647	protein_coding	protein_coding
-1.30550841	0.271034703	0.594292799	-2.196742771	0.028038822	72	530	DST	DNAH11	57	UCEC	0.084557602	0.868754655	0.069092647	protein_coding	protein_coding
-1.787989216	0.167296228	0.720630175	-2.48114675	0.013096044	72	530	ZFHX3	DNAH11	57	UCEC	0.04074491	0.686908576	0.069092647	protein_coding	protein_coding
-1.615499714	0.198791307	0.720071009	-2.243528336	0.024862765	72	530	TTN	DNAH6	57	UCEC	0.048468611	0.815331471	0.069092647	protein_coding	protein_coding
-1.590067417	0.203911864	0.720091229	-2.20814718	0.027234015	72	530	ZFHX3	DNAH7	57	UCEC	0.049715117	0.836366297	0.069092647	protein_coding	protein_coding
-2.43973339	0.087184093	1.009294896	-2.417265163	0.015637621	72	530	DST	DNAH8	57	UCEC	0.012058911	0.630327726	0.069092647	protein_coding	protein_coding
-1.658039843	0.190512048	0.720133602	-2.302405883	0.021312293	72	530	MACF1	FAT1	57	UCEC	0.046444292	0.781470418	0.069092647	protein_coding	protein_coding
-1.641663833	0.19365756	0.720094836	-2.279788371	0.022620243	72	530	HERC2	FAT1	57	UCEC	0.047214713	0.794312789	0.069092647	protein_coding	protein_coding
-1.702229649	0.182276658	0.720362333	-2.36301868	0.018126756	72	530	ZFHX4	FAT1	57	UCEC	0.044416697	0.748024553	0.069092647	protein_coding	protein_coding
-1.285525933	0.276505122	0.593971348	-2.164289469	0.03044214	72	530	PIK3CA	FAT4	57	UCEC	0.086318635	0.885730907	0.069092647	protein_coding	protein_coding
-1.271216909	0.280490083	0.594055267	-2.139896707	0.032363115	72	530	PTEN	FLNA	57	UCEC	0.087548248	0.898643759	0.069092647	protein_coding	protein_coding
-1.707852748	0.181254574	0.720457937	-2.370510003	0.017763563	72	530	DST	GPR98	57	UCEC	0.044159363	0.743969537	0.069092647	protein_coding	protein_coding
-1.218779099	0.295590834	0.593731246	-2.052745427	0.040097274	72	530	KMT2D	HERC2	57	UCEC	0.092320197	0.946422817	0.069092647	protein_coding	protein_coding
-1.237802137	0.290020944	0.593772408	-2.084640715	0.037101926	72	530	DNAH5	HUWE1	57	UCEC	0.090573278	0.928664062	0.069092647	protein_coding	protein_coding
-1.216427399	0.296286793	0.593574971	-2.049323943	0.040430449	72	530	PTEN	KMT2A	57	UCEC	0.092565911	0.948360612	0.069092647	protein_coding	protein_coding
-1.567816983	0.208499845	0.720453429	-2.176153127	0.029543812	72	530	MUC16	KMT2B	57	UCEC	0.050797624	0.85579171	0.069092647	protein_coding	protein_coding
-1.207496297	0.298944812	0.593498484	-2.034539819	0.041897198	72	530	ANK2	KMT2D	57	UCEC	0.093410331	0.956725015	0.069092647	protein_coding	protein_coding
-2.340921272	0.096238935	1.009295604	-2.319361407	0.020375448	72	530	PDE4DIP	KMT2D	57	UCEC	0.013311318	0.695793827	0.069092647	protein_coding	protein_coding
-2.401913278	0.090544551	1.009294117	-2.379795184	0.017322263	72	530	PCLO	MACF1	57	UCEC	0.012523734	0.654622327	0.069092647	protein_coding	protein_coding
-1.298628316	0.272905877	0.593971298	-2.186348601	0.028790111	72	530	RYR2	MACF1	57	UCEC	0.08519504	0.874201332	0.069092647	protein_coding	protein_coding
-1.224306163	0.293961591	0.594170096	-2.060531437	0.039347764	72	530	OBSCN	MACF1	57	UCEC	0.091732408	0.942016231	0.069092647	protein_coding	protein_coding
-2.34495352	0.095851657	1.009089499	-2.323831059	0.02013455	72	530	TTN	MED12	57	UCEC	0.013263108	0.692713974	0.069092647	protein_coding	protein_coding
-1.637361933	0.19449245	0.720145737	-2.273653579	0.022986823	72	530	KMT2C	MUC5B	57	UCEC	0.047413533	0.797816795	0.069092647	protein_coding	protein_coding
-2.325488932	0.097735646	1.0091047	-2.304507085	0.021194195	72	530	SYNE1	MUC5B	57	UCEC	0.013523395	0.706350491	0.069092647	protein_coding	protein_coding
-1.757433345	0.172487011	0.720504992	-2.439168868	0.014721087	72	530	TTN	NFASC	57	UCEC	0.042019431	0.708047879	0.069092647	protein_coding	protein_coding
-1.644589452	0.19309182	0.720169083	-2.283615737	0.022394124	72	530	MUC16	PCDH15	57	UCEC	0.047069933	0.792107592	0.069092647	protein_coding	protein_coding
-1.25174681	0.286004764	0.593792423	-2.108054535	0.035026272	72	530	FAT4	PCLO	57	UCEC	0.089315525	0.915839946	0.069092647	protein_coding	protein_coding
-1.254799832	0.285132917	0.593681953	-2.113589317	0.034550359	72	530	PTEN	PKHD1L1	57	UCEC	0.08906254	0.912850457	0.069092647	protein_coding	protein_coding
-1.625285824	0.196855401	0.720235782	-2.256602443	0.024032928	72	530	PTEN	PLXNA2	57	UCEC	0.047981107	0.807652254	0.069092647	protein_coding	protein_coding
-1.675856799	0.187147763	0.720268009	-2.326712805	0.019980556	72	530	PTEN	PLXNA4	57	UCEC	0.045612107	0.767872556	0.069092647	protein_coding	protein_coding
-1.72406543	0.178339645	0.720358844	-2.393342491	0.016695648	72	530	DNAH17	PTEN	57	UCEC	0.043457633	0.731862887	0.069092647	protein_coding	protein_coding
-1.642133005	0.193566723	0.720171865	-2.280195999	0.022596067	72	530	PTEN	RAB3GAP2	57	UCEC	0.047185442	0.794060083	0.069092647	protein_coding	protein_coding
-1.654832267	0.191124111	0.720055079	-2.298202339	0.021550276	72	530	PTEN	RIMS1	57	UCEC	0.046600676	0.783860418	0.069092647	protein_coding	protein_coding
-2.365679002	0.09388553	1.009063347	-2.344430615	0.019056156	72	530	PTEN	RIMS2	57	UCEC	0.012991719	0.678470117	0.069092647	protein_coding	protein_coding
-1.205048997	0.299677316	0.593381462	-2.030816725	0.04227359	72	530	PTEN	ROBO1	57	UCEC	0.093660694	0.958849326	0.069092647	protein_coding	protein_coding
-1.678319976	0.186687352	0.720226458	-2.33026704	0.019792042	72	530	PIK3CA	RYR1	57	UCEC	0.0455036	0.765921099	0.069092647	protein_coding	protein_coding
-1.290821093	0.275044853	0.593806897	-2.173806163	0.029719696	72	530	DST	SACS	57	UCEC	0.085890452	0.880769278	0.069092647	protein_coding	protein_coding
-1.264130952	0.282484682	0.593844986	-2.128722113	0.033277258	72	530	PTEN	SMG1	57	UCEC	0.088207161	0.904661191	0.069092647	protein_coding	protein_coding
-1.280034513	0.278027705	0.593869203	-2.155414873	0.031129384	72	530	PTEN	SORCS1	57	UCEC	0.086811329	0.890429921	0.069092647	protein_coding	protein_coding
-1.301198514	0.272205355	0.59380441	-2.19129143	0.02843071	72	530	PTEN	SYCP2	57	UCEC	0.085004154	0.871672176	0.069092647	protein_coding	protein_coding
-2.344510711	0.095894111	1.009112434	-2.323339435	0.020160925	72	530	NEB	SYNE1	57	UCEC	0.013268386	0.693051934	0.069092647	protein_coding	protein_coding
-2.388392861	0.091777064	1.009188588	-2.366646719	0.017950058	72	530	MUC16	SYNE2	57	UCEC	0.012696835	0.663395969	0.069092647	protein_coding	protein_coding
-2.415153829	0.089353593	1.009261357	-2.39299148	0.016711629	72	530	RYR2	SYNE2	57	UCEC	0.012359799	0.645970418	0.069092647	protein_coding	protein_coding
-1.655861312	0.190927537	0.720199383	-2.299170691	0.021495249	72	530	MUC16	TAF1	57	UCEC	0.046539582	0.783275712	0.069092647	protein_coding	protein_coding
-2.345832067	0.095767484	1.009057506	-2.324775399	0.020083973	72	530	PIK3CA	TAF1	57	UCEC	0.013252292	0.692062261	0.069092647	protein_coding	protein_coding
-2.455680425	0.085804792	1.009353017	-2.432925235	0.014977393	72	530	DNAH10	TENM1	57	UCEC	0.01186678	0.620426265	0.069092647	protein_coding	protein_coding
-1.615151784	0.198860484	0.720052871	-2.243101652	0.02489026	72	530	TTN	TENM2	57	UCEC	0.048487201	0.815586203	0.069092647	protein_coding	protein_coding
-2.361328236	0.094294894	1.009260617	-2.339661525	0.019301223	72	530	PTEN	TPTE	57	UCEC	0.013043321	0.681691939	0.069092647	protein_coding	protein_coding
-1.689761375	0.18456356	0.720561825	-2.34506092	0.019023971	72	530	HUWE1	USH2A	57	UCEC	0.044956382	0.757705721	0.069092647	protein_coding	protein_coding
-1.266504726	0.281814923	0.594002338	-2.132154447	0.032994152	72	530	RYR2	USH2A	57	UCEC	0.087970891	0.902794664	0.069092647	protein_coding	protein_coding
-1.516989998	0.219371202	0.719911144	-2.107190605	0.035101061	72	530	PTEN	WDFY4	57	UCEC	0.053503092	0.899456887	0.069092647	protein_coding	protein_coding
-1.681116471	0.186166011	0.720268578	-2.334013343	0.019595023	72	530	DNAH5	ZFHX3	57	UCEC	0.045372781	0.763845253	0.069092647	protein_coding	protein_coding
-1.266956429	0.281687655	0.593804028	-2.133627208	0.032873309	72	530	FAT4	ZFHX3	57	UCEC	0.087965347	0.902036283	0.069092647	protein_coding	protein_coding
-1.69500609	0.183598111	0.720277055	-2.353269591	0.018609137	72	530	FAT4	ZFHX4	57	UCEC	0.044746184	0.753321591	0.069092647	protein_coding	protein_coding
-2.409548472	0.089855858	1.009125472	-2.387759042	0.016951452	72	530	NEB	ZFHX4	57	UCEC	0.012432585	0.649428492	0.069092647	protein_coding	protein_coding
-1.195495394	0.302554034	0.593674529	-2.01372189	0.04403874	71	530	RYR2	AHNAK	57	UCEC	0.094505479	0.96860991	0.069092647	protein_coding	protein_coding
-1.183172725	0.306305373	0.593557572	-1.993357984	0.046222261	71	530	DST	AHNAK	57	UCEC	0.095699178	0.980394846	0.069092647	protein_coding	protein_coding
-1.203153837	0.300245791	0.593738603	-2.026403253	0.042723478	71	530	PIK3CA	AHNAK2	57	UCEC	0.093772701	0.961340923	0.069092647	protein_coding	protein_coding
-2.467137723	0.084827311	1.009284337	-2.444442694	0.014507613	71	530	TTN	APC	57	UCEC	0.011733174	0.613275863	0.069092647	protein_coding	protein_coding
-1.22755065	0.293009382	0.593866269	-2.067048954	0.038729541	71	530	HERC2	ARID1A	57	UCEC	0.091489731	0.938405836	0.069092647	protein_coding	protein_coding
-1.297404598	0.273240041	0.593933268	-2.184428231	0.028930796	71	530	ATRX	ARID1A	57	UCEC	0.085305717	0.875206524	0.069092647	protein_coding	protein_coding
-1.205382097	0.29957751	0.593796876	-2.029956951	0.042360915	71	530	COL6A3	ARID1A	57	UCEC	0.093553298	0.959310752	0.069092647	protein_coding	protein_coding
-1.575815272	0.206838854	0.720239911	-2.187903291	0.028676648	71	530	APOB	ARID1A	57	UCEC	0.050414044	0.848618924	0.069092647	protein_coding	protein_coding
-1.268282091	0.28131448	0.593960641	-2.135296523	0.032736797	71	530	CSMD1	ARID1A	57	UCEC	0.08782185	0.901117846	0.069092647	protein_coding	protein_coding
-1.202055326	0.300575795	0.593553159	-2.025185626	0.042848307	71	530	RYR3	ARID1A	57	UCEC	0.093909895	0.962047807	0.069092647	protein_coding	protein_coding
-1.061842873	0.345817924	0.520239204	-2.041066619	0.041244206	71	530	DNAH11	ARID1A	57	UCEC	0.124741496	0.95870292	0.069092647	protein_coding	protein_coding
-1.266833244	0.281722357	0.593808914	-2.1334022	0.032891747	71	530	DNAH2	ARID1A	57	UCEC	0.087975341	0.902156048	0.069092647	protein_coding	protein_coding
-1.688756665	0.184749086	0.720550343	-2.343703922	0.019093322	71	530	MUC16	ASPM	57	UCEC	0.045002585	0.75845031	0.069092647	protein_coding	protein_coding
-2.415674046	0.089307121	1.010172459	-2.391348155	0.016786626	71	530	PIK3CA	ATM	57	UCEC	0.01233133	0.646788438	0.069092647	protein_coding	protein_coding
-2.441827336	0.087001725	1.009298292	-2.419331684	0.015549055	71	530	MUC16	ATRX	57	UCEC	0.012033607	0.629013422	0.069092647	protein_coding	protein_coding
-1.771795056	0.170027506	0.720857431	-2.457899412	0.013975231	71	530	DST	ATRX	57	UCEC	0.04139167	0.698434071	0.069092647	protein_coding	protein_coding
-2.425022076	0.088476166	1.009174969	-2.402974855	0.016262306	71	530	ZFHX3	CACNA1E	57	UCEC	0.012240502	0.639518879	0.069092647	protein_coding	protein_coding
-1.616947117	0.198503784	0.720183704	-2.245187037	0.024756128	71	530	TTN	CDH23	57	UCEC	0.048387819	0.814332062	0.069092647	protein_coding	protein_coding
-1.644562372	0.193097049	0.720122048	-2.283727289	0.022387563	71	530	TTN	CEP170	57	UCEC	0.047075547	0.792056019	0.069092647	protein_coding	protein_coding
-1.176105242	0.308477848	0.593446784	-1.981820904	0.047499289	71	530	PTEN	CEP170	57	UCEC	0.096398857	0.987133939	0.069092647	protein_coding	protein_coding
-1.619023876	0.198091967	0.72021599	-2.247969912	0.024578109	71	530	TTN	CIT	57	UCEC	0.048284378	0.812694072	0.069092647	protein_coding	protein_coding
-1.660072628	0.190125171	0.720213741	-2.304972167	0.021168132	71	530	CSMD3	CSMD1	57	UCEC	0.046342697	0.780005978	0.069092647	protein_coding	protein_coding
-1.640979284	0.193790174	0.719922782	-2.279382353	0.022644346	71	530	PIK3R1	CTCF	57	UCEC	0.047262981	0.79458872	0.069092647	protein_coding	protein_coding
-1.246172221	0.287603576	0.59391678	-2.098226997	0.035885098	71	530	DST	DMD	57	UCEC	0.089792924	0.921184135	0.069092647	protein_coding	protein_coding
-1.182116275	0.30662914	0.593550059	-1.991603331	0.046414598	71	530	CSMD3	DMD	57	UCEC	0.095801744	0.981416681	0.069092647	protein_coding	protein_coding
-1.667378235	0.188741253	0.720382968	-2.314571982	0.020636368	71	530	NEB	DMD	57	UCEC	0.045990112	0.774585202	0.069092647	protein_coding	protein_coding
-1.670763573	0.18810338	0.720368854	-2.319316785	0.020377866	71	530	PTEN	DMXL1	57	UCEC	0.045835952	0.771946046	0.069092647	protein_coding	protein_coding
-1.642781489	0.193441239	0.720307135	-2.280668078	0.022568096	71	530	TTN	DMXL1	57	UCEC	0.047142353	0.793755734	0.069092647	protein_coding	protein_coding
-1.302099002	0.271960348	0.594023207	-2.192000221	0.028379491	71	530	SYNE1	DNAH11	57	UCEC	0.08489123	0.871261153	0.069092647	protein_coding	protein_coding
-1.207166859	0.299043312	0.593610915	-2.0335995	0.041991992	71	530	TTN	DYNC1H1	57	UCEC	0.093420521	0.95725117	0.069092647	protein_coding	protein_coding
-1.272178301	0.280220552	0.593815259	-2.142380618	0.032162866	71	530	DNAH7	FAT1	57	UCEC	0.087505274	0.897357995	0.069092647	protein_coding	protein_coding
-1.241124487	0.289058992	0.593930952	-2.089678074	0.036646728	71	530	DNAH10	FAT1	57	UCEC	0.090244813	0.925871501	0.069092647	protein_coding	protein_coding
-2.420003949	0.088921266	1.009294949	-2.397717289	0.016497593	71	530	DNAH5	FAT1	57	UCEC	0.012299188	0.642887296	0.069092647	protein_coding	protein_coding
-1.6973791	0.183162947	0.720137707	-2.35702017	0.018422246	71	530	TTN	FN1	57	UCEC	0.04465232	0.751330837	0.069092647	protein_coding	protein_coding
-1.693159298	0.183937492	0.72051562	-2.349927263	0.01877708	71	530	ZFHX3	GPR98	57	UCEC	0.04480794	0.755067082	0.069092647	protein_coding	protein_coding
-2.428129689	0.088201643	1.009399475	-2.405519073	0.016149509	71	530	SYNE1	GPR98	57	UCEC	0.012197154	0.637815184	0.069092647	protein_coding	protein_coding
-1.660209763	0.1900991	0.720141313	-2.305394417	0.021144494	71	530	TTN	GRIA3	57	UCEC	0.046342921	0.779788313	0.069092647	protein_coding	protein_coding
-2.357467589	0.094659637	1.009120714	-2.33616014	0.019482897	71	530	PTEN	GRIA3	57	UCEC	0.013097365	0.684141173	0.069092647	protein_coding	protein_coding
-2.350995136	0.095274304	1.00927521	-2.329389559	0.019838438	71	530	PTEN	HIVEP2	57	UCEC	0.013178421	0.688792148	0.069092647	protein_coding	protein_coding
-1.235869887	0.290581879	0.593599005	-2.081994538	0.037342969	71	530	PCLO	HUWE1	57	UCEC	0.090779305	0.930144028	0.069092647	protein_coding	protein_coding
-1.262304752	0.283001027	0.59388319	-2.125510157	0.033544067	71	530	PTEN	ITPR1	57	UCEC	0.088361776	0.90638266	0.069092647	protein_coding	protein_coding
-1.285905135	0.276400291	0.594068187	-2.164574982	0.030420249	71	530	PTEN	KANSL1	57	UCEC	0.086269533	0.885563168	0.069092647	protein_coding	protein_coding
-1.672696837	0.187740078	0.720140006	-2.322738387	0.020193211	71	530	DST	KIAA2022	57	UCEC	0.045767948	0.770109609	0.069092647	protein_coding	protein_coding
-1.697222573	0.18319162	0.720368883	-2.356046481	0.018470606	71	530	PIK3CA	LRP1B	57	UCEC	0.044639079	0.751789014	0.069092647	protein_coding	protein_coding
-1.654781323	0.191133848	0.720368312	-2.297132309	0.021611223	71	530	DST	LRP1B	57	UCEC	0.046574448	0.784381765	0.069092647	protein_coding	protein_coding
-1.235554918	0.290673418	0.593654322	-2.081269981	0.037409201	71	530	TTN	LYST	57	UCEC	0.090798057	0.930537923	0.069092647	protein_coding	protein_coding
-1.712377831	0.180436235	0.720543594	-2.3765083	0.017477368	71	530	TTN	MED12L	57	UCEC	0.04395261	0.740734967	0.069092647	protein_coding	protein_coding
-2.374354373	0.093074561	1.009260616	-2.352568142	0.018644273	71	530	NEB	MUC5B	57	UCEC	0.012874519	0.672869709	0.069092647	protein_coding	protein_coding
-1.648738014	0.192292426	0.720326339	-2.288876479	0.02208653	71	530	DST	NAV3	57	UCEC	0.046860619	0.789071462	0.069092647	protein_coding	protein_coding
-2.384009657	0.092180224	1.009225243	-2.362217625	0.018165975	71	530	ATRX	NEB	57	UCEC	0.012751694	0.666358023	0.069092647	protein_coding	protein_coding
-1.591308794	0.20365889	0.719968127	-2.210248946	0.02708789	71	530	TTN	NPAP1	57	UCEC	0.049665422	0.835127171	0.069092647	protein_coding	protein_coding
-1.219208565	0.295463915	0.593688783	-2.053615633	0.040012908	71	530	ZFHX3	NSD1	57	UCEC	0.092288238	0.945937716	0.069092647	protein_coding	protein_coding
-1.665078558	0.189175796	0.720343497	-2.311506338	0.020804903	71	530	PTEN	PCDH11X	57	UCEC	0.046099563	0.776308486	0.069092647	protein_coding	protein_coding
-2.295253551	0.100735848	1.009096045	-2.274564013	0.022932097	71	530	MUC16	PDE4DIP	57	UCEC	0.01393876	0.728021061	0.069092647	protein_coding	protein_coding
-2.367590202	0.093706268	1.009707076	-2.34482877	0.01903582	71	530	DST	PDE4DIP	57	UCEC	0.012950562	0.678029601	0.069092647	protein_coding	protein_coding
-1.590742147	0.203774325	0.72047834	-2.207897253	0.027251436	71	530	RYR2	PDE4DIP	57	UCEC	0.049643903	0.83643656	0.069092647	protein_coding	protein_coding
-1.187091146	0.305107488	0.593839283	-1.999010809	0.045607184	71	530	PTEN	PKD1L2	57	UCEC	0.095272303	0.977100124	0.069092647	protein_coding	none protein_coding
-1.700810088	0.182535594	0.720174	-2.361665499	0.018193049	71	530	PTEN	PKHD1	57	UCEC	0.044496216	0.748810712	0.069092647	protein_coding	protein_coding
-1.590944387	0.203733118	0.720291342	-2.208751229	0.027191949	71	530	TTN	PLXNA2	57	UCEC	0.049652059	0.835960968	0.069092647	protein_coding	protein_coding
-1.3633803	0.255794651	0.594523613	-2.29323154	0.021834678	71	530	TTN	PRKDC	57	UCEC	0.079766905	0.820276321	0.069092647	protein_coding	protein_coding
-1.66881011	0.188471192	0.720297719	-2.316833812	0.020512786	71	530	TTN	REV3L	57	UCEC	0.045931982	0.773347657	0.069092647	protein_coding	protein_coding
-2.340041437	0.096323647	1.009147269	-2.318830471	0.02040423	71	530	DST	RYR1	57	UCEC	0.013326909	0.696203839	0.069092647	protein_coding	protein_coding
-1.285388038	0.276543253	0.593721246	-2.164968908	0.030390066	71	530	KMT2D	RYR1	57	UCEC	0.086372868	0.885418915	0.069092647	protein_coding	protein_coding
-2.388929655	0.091727812	1.009264684	-2.367000147	0.017932926	71	530	DNAH5	RYR2	57	UCEC	0.012688129	0.663138856	0.069092647	protein_coding	protein_coding
-1.657364236	0.190640803	0.720162062	-2.301376764	0.021370344	71	530	PTEN	SCN3A	57	UCEC	0.046473088	0.782042186	0.069092647	protein_coding	protein_coding
-1.242487029	0.288665405	0.593835212	-2.092309456	0.036410842	71	530	TTN	SMG1	57	UCEC	0.090138848	0.924437334	0.069092647	protein_coding	protein_coding
-1.660830801	0.189981078	0.720252944	-2.305899358	0.021116257	71	530	PTEN	SPEG	57	UCEC	0.046304017	0.779474713	0.069092647	protein_coding	protein_coding
-1.205701622	0.299481803	0.593786801	-2.03052951	0.042302745	71	530	PTEN	SRRM2	57	UCEC	0.093525257	0.958985339	0.069092647	protein_coding	protein_coding
-1.247004969	0.287364174	0.593639459	-2.100609976	0.035675218	71	530	RYR3	SYNE1	57	UCEC	0.089766959	0.919917184	0.069092647	protein_coding	protein_coding
-1.290297624	0.275188868	0.593857442	-2.17273967	0.029799916	71	530	DNAH10	SYNE1	57	UCEC	0.085926911	0.881317761	0.069092647	protein_coding	protein_coding
-2.392448316	0.09140562	1.00922453	-2.370580822	0.01776016	71	530	DST	SYNE2	57	UCEC	0.012644557	0.660757591	0.069092647	protein_coding	protein_coding
-2.37374789	0.093131026	1.009181526	-2.35215155	0.018665169	71	530	SYNE2	TENM1	57	UCEC	0.012884327	0.673173555	0.069092647	protein_coding	protein_coding
-1.586712217	0.204597178	0.720080146	-2.203521685	0.027558	71	530	PTEN	TENM2	57	UCEC	0.049883285	0.839158957	0.069092647	protein_coding	protein_coding
-1.717663669	0.179484995	0.720191217	-2.385010576	0.01707863	71	530	ZFHX3	TNRC6B	57	UCEC	0.043751103	0.736321169	0.069092647	protein_coding	protein_coding
-1.704944343	0.181782503	0.720337667	-2.366868235	0.017939318	71	530	DNAH17	TTN	57	UCEC	0.044298424	0.745960585	0.069092647	protein_coding	protein_coding
-1.721895682	0.178727017	0.72051297	-2.389819133	0.016856672	71	530	MACF1	USH2A	57	UCEC	0.043538873	0.733674169	0.069092647	protein_coding	protein_coding
-1.63327503	0.195288948	0.720085152	-2.268169295	0.02331889	71	530	PTEN	WDR87	57	UCEC	0.047613358	0.800988945	0.069092647	protein_coding	protein_coding
-1.247794628	0.287137344	0.593479146	-2.102507958	0.035508803	71	530	XIST	ZFHX3	57	UCEC	0.08972429	0.918902275	0.069092647	none protein_coding	protein_coding
-2.321842829	0.098092651	1.009121614	-2.300855315	0.021399811	71	530	CSMD3	ZFHX3	57	UCEC	0.013572343	0.70895412	0.069092647	protein_coding	protein_coding
-1.640944211	0.193796971	0.720401766	-2.277818141	0.022737415	71	530	RYR2	ZFHX4	57	UCEC	0.047220287	0.795362932	0.069092647	protein_coding	protein_coding
-2.414945365	0.089372222	1.009297694	-2.392698783	0.016724965	71	530	ATRX	ZFHX4	57	UCEC	0.012361495	0.646151111	0.069092647	protein_coding	protein_coding
-1.19966344	0.301295599	0.59363176	-2.020888234	0.043291336	71	530	FLG	ZFHX4	57	UCEC	0.094120285	0.964500248	0.069092647	protein_coding	protein_coding
-1.589954903	0.203934808	0.720075042	-2.208040565	0.027241446	70	530	TTN	ADGB	57	UCEC	0.049722289	0.836433867	0.069092647	protein_coding	protein_coding
-1.6097944	0.199928715	0.720124064	-2.235440364	0.025388453	70	530	RYR2	ANK2	57	UCEC	0.048740861	0.820081762	0.069092647	protein_coding	protein_coding
-2.36983686	0.093495978	1.009297978	-2.348005161	0.01887426	70	530	ZFHX4	ANK2	57	UCEC	0.012931865	0.675965781	0.069092647	protein_coding	protein_coding
-1.621618425	0.197578674	0.720236052	-2.251509654	0.024353276	70	530	NBEA	ARID1A	57	UCEC	0.04815737	0.810620105	0.069092647	protein_coding	protein_coding
-2.391177965	0.091521811	1.009303782	-2.369136041	0.017829694	70	530	NFASC	ARID1A	57	UCEC	0.012658664	0.661700294	0.069092647	protein_coding	protein_coding
-1.636646376	0.19463167	0.72013946	-2.272679761	0.023045485	70	530	XIST	ARID1A	57	UCEC	0.047448056	0.79837806	0.069092647	none protein_coding	protein_coding
-2.35186566	0.095191402	1.00921347	-2.330394639	0.019785303	70	530	PCDH15	ARID1A	57	UCEC	0.013168547	0.688109526	0.069092647	protein_coding	protein_coding
-2.309099096	0.099350717	1.00916818	-2.288121189	0.022130465	70	530	FLG	ASH1L	57	UCEC	0.013745157	0.718112194	0.069092647	protein_coding	protein_coding
-1.646689933	0.19268666	0.720446254	-2.28565271	0.022274584	70	530	SYNE1	ASPM	57	UCEC	0.046945657	0.79087506	0.069092647	protein_coding	protein_coding
-2.37693725	0.092834471	1.009205842	-2.355255145	0.018509991	70	530	KMT2D	ASPM	57	UCEC	0.012842687	0.671061964	0.069092647	protein_coding	protein_coding
-1.653728009	0.191335278	0.720579118	-2.29499852	0.021733209	70	530	DST	ASPM	57	UCEC	0.046604271	0.7855329	0.069092647	protein_coding	protein_coding
-1.697285356	0.183180118	0.720493255	-2.355726921	0.018486502	70	530	TTN	ATP11C	57	UCEC	0.044625397	0.751925088	0.069092647	protein_coding	protein_coding
-1.302586812	0.271827716	0.594006543	-2.192882935	0.028315814	70	530	PTEN	ATP11C	57	UCEC	0.084852601	0.870807804	0.069092647	protein_coding	protein_coding
-1.234473596	0.290987899	0.593670356	-2.079392349	0.037581303	70	530	TTN	BAZ2B	57	UCEC	0.090893436	0.931573956	0.069092647	protein_coding	protein_coding
-1.502373173	0.222601262	0.71988759	-2.086955232	0.036892181	70	530	ARID1A	BCL11B	57	UCEC	0.054293387	0.912658513	0.069092647	protein_coding	protein_coding
-1.671819328	0.187904894	0.720772938	-2.319481267	0.020368956	70	530	PTEN	BRWD3	57	UCEC	0.045751336	0.771742473	0.069092647	protein_coding	protein_coding
-1.651627988	0.191737508	0.72021662	-2.293237816	0.021834317	70	530	TTN	CACNA1C	57	UCEC	0.046735438	0.786625176	0.069092647	protein_coding	protein_coding
-1.246580565	0.287486158	0.593563659	-2.100163221	0.035714486	70	530	KMT2D	CACNA1E	57	UCEC	0.089818408	0.920170966	0.069092647	protein_coding	protein_coding
-2.376648033	0.092861325	1.009154599	-2.355088146	0.018518312	70	530	RYR2	CACNA1E	57	UCEC	0.012847693	0.67118866	0.069092647	protein_coding	protein_coding
-1.184793981	0.305809175	0.593776263	-1.995354234	0.046004259	70	530	PTEN	CHD9	57	UCEC	0.095503206	0.979226304	0.069092647	protein_coding	protein_coding
-1.190136738	0.304179668	0.593426287	-2.005534241	0.044905964	70	530	PTEN	DGKK	57	UCEC	0.095059501	0.973340591	0.069092647	protein_coding	protein_coding
-2.374453809	0.093065307	1.009285546	-2.352608554	0.018642247	70	530	MACF1	DMD	57	UCEC	0.01287261	0.672835681	0.069092647	protein_coding	protein_coding
-2.312335758	0.099029672	1.009033199	-2.291634963	0.021926716	70	530	PTEN	DNAH6	57	UCEC	0.013704366	0.715602318	0.069092647	protein_coding	protein_coding
-2.339898385	0.096337427	1.009141498	-2.318701976	0.020411201	70	530	MUC16	DNAH7	57	UCEC	0.013328966	0.696295563	0.069092647	protein_coding	protein_coding
-2.423102548	0.088646161	1.009215641	-2.400976015	0.016351408	70	530	SYNE1	DNAH8	57	UCEC	0.012263043	0.640798713	0.069092647	protein_coding	protein_coding
-2.395054102	0.091167746	1.009369669	-2.37282155	0.01765279	70	530	PTEN	DOCK1	57	UCEC	0.012608064	0.659225544	0.069092647	protein_coding	protein_coding
-2.246822337	0.105734681	1.00896945	-2.226848729	0.025957385	70	530	DNAH14	DST	57	UCEC	0.014634077	0.763958191	0.069092647	protein_coding	protein_coding
-1.589852064	0.203955782	0.720335569	-2.207099207	0.027307129	70	530	TTN	F8	57	UCEC	0.049702016	0.836947154	0.069092647	protein_coding	protein_coding
-1.62499912	0.196911848	0.720194983	-2.256332185	0.024049835	70	530	OBSCN	FAT1	57	UCEC	0.047998703	0.807819244	0.069092647	protein_coding	protein_coding
-2.377563318	0.092776369	1.009242086	-2.355790895	0.018483319	70	530	USH2A	FAT1	57	UCEC	0.012833738	0.670689609	0.069092647	protein_coding	protein_coding
-2.361696141	0.094260209	1.009214441	-2.340133123	0.019276867	70	530	CSMD3	FAT1	57	UCEC	0.013039704	0.681379515	0.069092647	protein_coding	protein_coding
-2.412611244	0.089581071	1.009221392	-2.390566891	0.016822384	70	530	NEB	FAT1	57	UCEC	0.012392236	0.647564215	0.069092647	protein_coding	protein_coding
-1.513818104	0.220068129	0.720069809	-2.102321309	0.035525139	70	530	TTN	FCGBP	57	UCEC	0.053656378	0.902595048	0.069092647	protein_coding	protein_coding
-1.619154738	0.198066046	0.720133261	-2.248409878	0.024550066	70	530	RYR2	FLG	57	UCEC	0.048285888	0.812455979	0.069092647	protein_coding	protein_coding
-1.583408618	0.205274203	0.720461255	-2.197770675	0.027965452	70	530	ASH1L	HERC2	57	UCEC	0.050010981	0.842564924	0.069092647	protein_coding	protein_coding
-2.324556908	0.097826781	1.009343208	-2.303039134	0.021276641	70	530	PDE4DIP	HMCN1	57	UCEC	0.013529679	0.70733972	0.069092647	protein_coding	protein_coding
-1.658475465	0.190429075	0.72039449	-2.302176775	0.021325205	70	530	PIK3CA	HMCN1	57	UCEC	0.046400332	0.781529592	0.069092647	protein_coding	protein_coding
-1.238153885	0.289918948	0.594015343	-2.084380309	0.037125588	70	530	HMCN1	HUWE1	57	UCEC	0.090498323	0.928779601	0.069092647	protein_coding	protein_coding
-1.611213314	0.199645235	0.720271591	-2.23695247	0.025289447	70	530	ZFHX4	HUWE1	57	UCEC	0.048657679	0.819155788	0.069092647	protein_coding	protein_coding
-1.230571839	0.292125481	0.593915819	-2.0719634	0.038268855	70	530	FAT4	HUWE1	57	UCEC	0.091204883	0.935665878	0.069092647	protein_coding	protein_coding
-2.361509819	0.094277773	1.009157838	-2.340079749	0.019279623	70	530	PTEN	ITPR2	57	UCEC	0.013043581	0.681430879	0.069092647	protein_coding	protein_coding
-2.32763601	0.097526025	1.00917307	-2.306478522	0.021083909	70	530	TTN	ITPR2	57	UCEC	0.013492582	0.704929985	0.069092647	protein_coding	protein_coding
-1.179119674	0.307549363	0.594450096	-1.983546951	0.047306368	70	530	PTEN	KCNMA1	57	UCEC	0.095919895	0.986100022	0.069092647	protein_coding	protein_coding
-1.174343698	0.309021725	0.593579108	-1.978411441	0.04788231	70	530	SYNE1	KIAA2022	57	UCEC	0.096543775	0.989130854	0.069092647	protein_coding	protein_coding
-1.231568519	0.291834471	0.59376881	-2.074154954	0.038064922	70	530	OBSCN	KMT2C	57	UCEC	0.091140283	0.934464491	0.069092647	protein_coding	protein_coding
-1.24465282	0.288040893	0.593805967	-2.096059807	0.036076886	70	530	USH2A	KMT2D	57	UCEC	0.089948993	0.92238449	0.069092647	protein_coding	protein_coding
-1.622702453	0.197364609	0.720084398	-2.253489256	0.024228317	70	530	MUC16	LRP1B	57	UCEC	0.048119495	0.809501192	0.069092647	protein_coding	protein_coding
-2.408064429	0.089989307	1.009289929	-2.385899592	0.017037402	70	530	FAT3	MACF1	57	UCEC	0.012447037	0.650602665	0.069092647	protein_coding	protein_coding
-1.622526652	0.197399309	0.72020252	-2.252875556	0.024266997	70	530	NEB	MKI67	57	UCEC	0.048116814	0.809830985	0.069092647	protein_coding	protein_coding
-1.631701731	0.195596438	0.720595117	-2.264380776	0.023550705	70	530	USH2A	MUC5B	57	UCEC	0.047640685	0.803052409	0.069092647	protein_coding	protein_coding
-1.633455063	0.195253793	0.720733062	-2.266380091	0.023428122	70	530	MACF1	MUC5B	57	UCEC	0.047544372	0.801862397	0.069092647	protein_coding	protein_coding
-1.535107086	0.21543262	0.719894686	-2.132405082	0.03297356	70	530	PTEN	NCOR2	57	UCEC	0.052544194	0.883279581	0.069092647	protein_coding	protein_coding
-2.392857655	0.091368212	1.009176671	-2.37109886	0.017735287	70	530	CSMD3	NEB	57	UCEC	0.012640568	0.66042522	0.069092647	protein_coding	protein_coding
-2.312076292	0.09905537	1.009163384	-2.291082226	0.021958658	70	530	DST	PCDH15	57	UCEC	0.013704425	0.715970682	0.069092647	protein_coding	protein_coding
-1.658860853	0.1903557	0.720391941	-2.302719893	0.021294608	70	530	MUC16	PCLO	57	UCEC	0.046382685	0.781224554	0.069092647	protein_coding	protein_coding
-2.334728104	0.096836808	1.009127266	-2.313611159	0.020689061	70	530	CSMD3	PCLO	57	UCEC	0.013398433	0.699885407	0.069092647	protein_coding	protein_coding
-1.650734015	0.191908993	0.720197277	-2.292058118	0.02190229	70	530	DNAH5	PIK3CA	57	UCEC	0.04677901	0.787298864	0.069092647	protein_coding	protein_coding
-1.671351826	0.18799276	0.720459693	-2.319840849	0.020349488	70	530	PTEN	PTCH1	57	UCEC	0.045800841	0.771629453	0.069092647	protein_coding	protein_coding
-1.553666971	0.211471092	0.720034333	-2.157767901	0.030945882	70	530	NAV1	PTEN	57	UCEC	0.051563859	0.867274556	0.069092647	protein_coding	protein_coding
-1.534088588	0.215652149	0.719963012	-2.130788059	0.033106607	70	530	TTN	PXDN	57	UCEC	0.052590694	0.884298074	0.069092647	protein_coding	protein_coding
-1.642245236	0.193545	0.720182967	-2.280316685	0.022588913	70	530	TTN	SCN3A	57	UCEC	0.04717912	0.793988247	0.069092647	protein_coding	protein_coding
-2.365827816	0.09387156	1.0091178	-2.344451576	0.019055085	70	530	TTN	SETX	57	UCEC	0.012988399	0.678441564	0.069092647	protein_coding	protein_coding
-1.498709288	0.223418343	0.719932109	-2.08173697	0.037366502	70	530	DST	SSPO	57	UCEC	0.054487922	0.916088454	0.069092647	protein_coding	none protein_coding
-1.179912862	0.307305516	0.593668892	-1.98749316	0.046867773	70	530	FAT2	SYNE1	57	UCEC	0.095990707	0.983810645	0.069092647	protein_coding	protein_coding
-1.644725296	0.193065591	0.720307944	-2.283364095	0.02240893	70	530	FAT4	SYNE1	57	UCEC	0.047050732	0.792215581	0.069092647	protein_coding	protein_coding
-1.634275342	0.195093696	0.72029334	-2.268902475	0.023274257	70	530	HMCN1	SYNE1	57	UCEC	0.047546348	0.80051469	0.069092647	protein_coding	protein_coding
-2.335104893	0.096800328	1.009223535	-2.313763811	0.020680681	70	530	PIK3CA	SYNE2	57	UCEC	0.013390858	0.699753769	0.069092647	protein_coding	protein_coding
-2.455167653	0.085848801	1.009372143	-2.432371123	0.015000329	70	530	ZFHX3	SYNE2	57	UCEC	0.011872422	0.620767755	0.069092647	protein_coding	protein_coding
-2.271985789	0.103107227	1.009098146	-2.2515013	0.024353805	70	530	ASH1L	TENM1	57	UCEC	0.014266828	0.745162159	0.069092647	protein_coding	protein_coding
-2.378886152	0.092653722	1.00936617	-2.35681185	0.018432583	70	530	CSMD3	TENM1	57	UCEC	0.012813655	0.669965904	0.069092647	protein_coding	protein_coding
-2.373683199	0.093137051	1.009201721	-2.35204038	0.018670748	70	530	HUWE1	TENM1	57	UCEC	0.01288465	0.673243753	0.069092647	protein_coding	protein_coding
-2.290389882	0.101226988	1.009119071	-2.269692396	0.023226253	70	530	PDE4DIP	TENM1	57	UCEC	0.014006087	0.731603555	0.069092647	protein_coding	protein_coding
-2.424480574	0.088524089	1.009319979	-2.402093116	0.016301558	70	530	DNAH8	TENM1	57	UCEC	0.012243651	0.640047162	0.069092647	protein_coding	protein_coding
-1.652073034	0.191652195	0.720565331	-2.292745657	0.021862652	70	530	MUC5B	TENM1	57	UCEC	0.046682726	0.786812752	0.069092647	protein_coding	protein_coding
-1.678296208	0.186691789	0.720388067	-2.329711285	0.019821416	70	530	TTN	TG	57	UCEC	0.04549027	0.766181956	0.069092647	protein_coding	protein_coding
-1.60902439	0.200082722	0.720468273	-2.233303602	0.02552893	70	530	ZFHX4	TNRC6B	57	UCEC	0.048745509	0.821267357	0.069092647	protein_coding	protein_coding
-1.606744908	0.200539327	0.720423668	-2.230277791	0.025729007	70	530	PIK3CA	TNRC6B	57	UCEC	0.048861022	0.823069596	0.069092647	protein_coding	protein_coding
-1.231117318	0.291966176	0.593444011	-2.074529854	0.038030129	70	530	PTEN	UBR3	57	UCEC	0.09123948	0.934291252	0.069092647	protein_coding	protein_coding
-1.21058321	0.298023419	0.593594845	-2.039409911	0.041409134	70	530	PCLO	USH2A	57	UCEC	0.09310484	0.953956397	0.069092647	protein_coding	protein_coding
-1.205605052	0.299510725	0.593783027	-2.03037978	0.04231795	70	530	PTEN	USP34	57	UCEC	0.093534981	0.959070858	0.069092647	protein_coding	protein_coding
-2.301790901	0.100079451	1.009152259	-2.280915373	0.022553455	70	530	TTN	VPS13A	57	UCEC	0.013846409	0.723356949	0.069092647	protein_coding	protein_coding
-2.45259028	0.086070351	1.009216254	-2.430193003	0.015090784	70	530	TTN	VPS13B	57	UCEC	0.011906698	0.622179638	0.069092647	protein_coding	protein_coding
-1.617769277	0.198340649	0.720074742	-2.24666855	0.024661218	70	530	TTN	WDR44	57	UCEC	0.048358379	0.813489075	0.069092647	protein_coding	protein_coding
-1.693219739	0.183926375	0.720400484	-2.350386731	0.018753915	69	530	PCLO	ABCA13	57	UCEC	0.044815344	0.754851083	0.069092647	protein_coding	protein_coding
-1.584391009	0.205072643	0.720422566	-2.199252332	0.027859985	69	530	PIK3CA	AHNAK	57	UCEC	0.049965664	0.841673776	0.069092647	protein_coding	protein_coding
-1.53356585	0.215764909	0.720358692	-2.12889199	0.033263198	69	530	DST	AHNAK2	57	UCEC	0.052577401	0.88544688	0.069092647	protein_coding	protein_coding
-1.626581254	0.196600554	0.720516188	-2.25752215	0.023975467	69	530	DST	ANK2	57	UCEC	0.047892662	0.807050104	0.069092647	protein_coding	protein_coding
-1.19271189	0.303397367	0.593923588	-2.008190807	0.04462302	69	530	TENM3	ARID1A	57	UCEC	0.094722651	0.971784063	0.069092647	protein_coding	protein_coding
-2.494270901	0.082556621	1.00971852	-2.470263595	0.013501352	69	530	DNAH8	ARID1A	57	UCEC	0.011409383	0.597367604	0.069092647	protein_coding	protein_coding
-1.610993721	0.19968908	0.720161819	-2.236988519	0.02528709	69	530	NAV3	ARID1A	57	UCEC	0.048678838	0.819159425	0.069092647	protein_coding	protein_coding
-1.650218648	0.192007922	0.720609628	-2.290031362	0.022019499	69	530	ASPM	ARID1A	57	UCEC	0.046765313	0.788341603	0.069092647	protein_coding	protein_coding
-2.32403683	0.097877672	1.00913858	-2.302990764	0.021279363	69	530	PCLO	ASH1L	57	UCEC	0.013542147	0.707423903	0.069092647	protein_coding	protein_coding
-2.378575284	0.09268253	1.009461348	-2.356281684	0.018458914	69	530	ZFHX3	ATM	57	UCEC	0.012815249	0.670299238	0.069092647	protein_coding	protein_coding
-2.3596166	0.094456431	1.009363726	-2.337726767	0.019401427	69	530	SYNE1	ATM	57	UCEC	0.013063026	0.682997761	0.069092647	protein_coding	protein_coding
-1.52507482	0.217604775	0.719957158	-2.118285516	0.034150895	69	530	PTEN	BTBD7	57	UCEC	0.053067486	0.892294726	0.069092647	protein_coding	protein_coding
-1.605762356	0.200736464	0.720126795	-2.229832812	0.025758544	69	530	ANK2	CACNA1E	57	UCEC	0.048937521	0.823399449	0.069092647	protein_coding	protein_coding
-1.661966322	0.189765473	0.720285012	-2.307373185	0.021034025	69	530	SYNE1	CACNA1E	57	UCEC	0.04624856	0.778639044	0.069092647	protein_coding	protein_coding
-2.350027966	0.095366495	1.009112957	-2.32880566	0.019869363	69	530	PTEN	CAMSAP2	57	UCEC	0.013195369	0.689239426	0.069092647	protein_coding	protein_coding
-2.277338061	0.102556844	1.009096351	-2.25680933	0.024019991	69	530	ARID1A	CHD3	57	UCEC	0.014190722	0.741181895	0.069092647	protein_coding	protein_coding
-1.61318568	0.199251849	0.720201105	-2.23991003	0.025096764	69	530	SACS	CSMD3	57	UCEC	0.048568513	0.817428769	0.069092647	protein_coding	protein_coding
-1.54462852	0.213391127	0.720028285	-2.145233114	0.031934213	69	530	CSMD3	CTCF	57	UCEC	0.052032646	0.875138533	0.069092647	protein_coding	protein_coding
-1.674170102	0.187463691	0.720533047	-2.323516053	0.020151446	69	530	ANK3	DMD	57	UCEC	0.045665377	0.769568486	0.069092647	protein_coding	protein_coding
-1.220236459	0.295160365	0.593945096	-2.05446003	0.039931188	69	530	FAT4	DMD	57	UCEC	0.09214712	0.945440737	0.069092647	protein_coding	protein_coding
-2.361524694	0.094276371	1.009314065	-2.339732276	0.019297568	69	530	ATRX	DMD	57	UCEC	0.013039393	0.68162943	0.069092647	protein_coding	protein_coding
-1.277492014	0.278735489	0.594226576	-2.14983992	0.031567879	69	530	MUC16	DNAH11	57	UCEC	0.086971387	0.893322228	0.069092647	protein_coding	protein_coding
-1.736693114	0.176101787	0.7205182	-2.410338994	0.015937704	69	530	DST	DNAH2	57	UCEC	0.042898913	0.722905015	0.069092647	protein_coding	protein_coding
-1.571366217	0.207761142	0.720126327	-2.182070227	0.02910435	69	530	CSMD3	DNAH7	57	UCEC	0.050650113	0.852213142	0.069092647	protein_coding	protein_coding
-1.634880089	0.19497575	0.720553959	-2.26892111	0.023273124	69	530	PIK3CA	DNAH8	57	UCEC	0.047493337	0.800439499	0.069092647	protein_coding	protein_coding
-2.412807805	0.089563464	1.009364225	-2.390423342	0.016828962	69	530	MUC16	DNAH8	57	UCEC	0.012386332	0.64761822	0.069092647	protein_coding	protein_coding
-1.191539205	0.303753365	0.593816588	-2.006577836	0.044794633	69	530	SYNE1	DOCK11	57	UCEC	0.094853686	0.972720308	0.069092647	protein_coding	protein_coding
-1.201635823	0.300701914	0.593593008	-2.024342952	0.042934877	69	530	PTEN	DOCK4	57	UCEC	0.093941961	0.962526649	0.069092647	protein_coding	protein_coding
-2.33651838	0.096663599	1.009342921	-2.314890539	0.020618923	69	530	DST	DYNC2H1	57	UCEC	0.013368815	0.698928903	0.069092647	protein_coding	protein_coding
-2.331818283	0.097118997	1.009358658	-2.310197931	0.020877199	69	530	MACF1	DYNC2H1	57	UCEC	0.013431384	0.702243328	0.069092647	protein_coding	protein_coding
-1.658966876	0.190335519	0.720494463	-2.302539382	0.021304773	69	530	SYNE2	FAT1	57	UCEC	0.046368449	0.781298712	0.069092647	protein_coding	protein_coding
-2.373888709	0.093117913	1.009344743	-2.351910707	0.018677258	69	530	TENM1	FAT1	57	UCEC	0.012878392	0.673294123	0.069092647	protein_coding	protein_coding
-1.589749401	0.203976722	0.720190654	-2.207400765	0.027286073	69	530	COL6A3	FAT1	57	UCEC	0.049721239	0.83679537	0.069092647	protein_coding	protein_coding
-1.719097021	0.179227914	0.720349961	-2.386474789	0.017010774	69	530	ANK3	FAT1	57	UCEC	0.043674846	0.735495323	0.069092647	protein_coding	protein_coding
-2.334566496	0.096852459	1.009238122	-2.313196901	0.020711816	69	530	HUWE1	FAT1	57	UCEC	0.013397687	0.700150633	0.069092647	protein_coding	protein_coding
-1.211400709	0.297779884	0.593685475	-2.040475572	0.041302982	69	530	FAT4	FAT1	57	UCEC	0.093012235	0.95334619	0.069092647	protein_coding	protein_coding
-1.20452792	0.299833512	0.593839104	-2.028374203	0.042522071	69	530	PCLO	FAT2	57	UCEC	0.093625494	0.960209993	0.069092647	protein_coding	protein_coding
-1.617107194	0.198472011	0.72045911	-2.244550968	0.024796973	69	530	PTEN	FBN1	57	UCEC	0.048353965	0.814641339	0.069092647	protein_coding	protein_coding
-2.401886416	0.090546983	1.009687605	-2.378841142	0.017367159	69	530	ZFHX3	FBN2	57	UCEC	0.012514415	0.655144989	0.069092647	protein_coding	protein_coding
-2.337127212	0.096604765	1.009179117	-2.315869573	0.020565391	69	530	MUC16	GPR98	57	UCEC	0.013364969	0.69827928	0.069092647	protein_coding	protein_coding
-1.591731671	0.203572785	0.720111844	-2.210395071	0.027077756	69	530	TTN	GRIA4	57	UCEC	0.049630442	0.835009267	0.069092647	protein_coding	protein_coding
-2.348480392	0.095514196	1.009143333	-2.327202009	0.019954516	69	530	TTN	HERC1	57	UCEC	0.013215019	0.690348001	0.069092647	protein_coding	protein_coding
-2.357115845	0.094692939	1.009369127	-2.335236714	0.019531058	69	530	PTEN	HERC1	57	UCEC	0.013095595	0.684715158	0.069092647	protein_coding	protein_coding
-1.641827753	0.193625818	0.720481735	-2.278791638	0.022679454	69	530	ZFHX3	HERC2	57	UCEC	0.04717119	0.794785071	0.069092647	protein_coding	protein_coding
-1.623389066	0.197229142	0.720477777	-2.253211853	0.024245794	69	530	SYNE1	HERC2	57	UCEC	0.048049406	0.809569524	0.069092647	protein_coding	protein_coding
-1.603354526	0.201220385	0.720351532	-2.225794568	0.026027945	69	530	MUC16	HERC2	57	UCEC	0.049033893	0.825748093	0.069092647	protein_coding	protein_coding
-1.191115154	0.3038822	0.593962529	-2.005370871	0.044923413	69	530	DST	HERC2	57	UCEC	0.094866778	0.973411276	0.069092647	protein_coding	protein_coding
-2.305143269	0.099744509	1.009144116	-2.284255769	0.022356504	69	530	TTN	HIVEP2	57	UCEC	0.013800289	0.720924544	0.069092647	protein_coding	protein_coding
-1.623174877	0.197271391	0.720435591	-2.253046487	0.024256218	69	530	MUC16	HMCN1	57	UCEC	0.048063673	0.809675994	0.069092647	protein_coding	protein_coding
-1.642528615	0.193490161	0.720463663	-2.279821593	0.022618272	69	530	TTN	HYDIN	57	UCEC	0.047139811	0.794200099	0.069092647	protein_coding	protein_coding
-1.202072341	0.300570681	0.593634157	-2.024937963	0.042873735	69	530	TTN	ITPR1	57	UCEC	0.09389339	0.962184179	0.069092647	protein_coding	protein_coding
-1.605316837	0.200825916	0.72019353	-2.22900758	0.0258134	69	530	ANK2	KIAA2022	57	UCEC	0.048952925	0.823874128	0.069092647	protein_coding	protein_coding
-1.659438942	0.190245689	0.720337394	-2.303696792	0.02123967	69	530	DNAH5	KMT2D	57	UCEC	0.046360836	0.780689597	0.069092647	protein_coding	protein_coding
-1.276092878	0.279125751	0.593777416	-2.149109822	0.031625695	69	530	DNAH2	KMT2D	57	UCEC	0.087169863	0.893785789	0.069092647	protein_coding	protein_coding
-1.56363947	0.209372677	0.72022874	-2.171031763	0.029928771	69	530	CSMD3	KMT2D	57	UCEC	0.051032745	0.858995891	0.069092647	protein_coding	protein_coding
-1.182334792	0.306562144	0.593494043	-1.992159492	0.046353561	69	530	PTEN	LRRC4	57	UCEC	0.095791328	0.981094526	0.069092647	protein_coding	protein_coding
-2.315787735	0.098688413	1.008998186	-2.295135677	0.02172535	69	530	PTEN	LRRC7	57	UCEC	0.013658077	0.713087397	0.069092647	protein_coding	protein_coding
-1.694649203	0.183663646	0.72087084	-2.350836113	0.018731282	69	530	ATRX	MACF1	57	UCEC	0.044710091	0.754468043	0.069092647	protein_coding	protein_coding
-1.248564346	0.286916414	0.593883499	-2.102372516	0.035520657	69	530	KMT2C	MACF1	57	UCEC	0.089584228	0.918923238	0.069092647	protein_coding	protein_coding
-1.207379555	0.298979714	0.593877874	-2.033043505	0.042048128	69	530	FAT4	MACF1	57	UCEC	0.093351794	0.957548486	0.069092647	protein_coding	protein_coding
-1.640929954	0.193799734	0.720154764	-2.2785796	0.022692068	69	530	MUC16	MDN1	57	UCEC	0.047243826	0.794989305	0.069092647	protein_coding	protein_coding
-1.579078623	0.206164966	0.720068575	-2.192955889	0.028310557	69	530	MUC16	MGAM	57	UCEC	0.050266671	0.845570091	0.069092647	protein_coding	protein_coding
-1.637731079	0.194420667	0.720074758	-2.274390346	0.022942527	69	530	TTN	MGAM	57	UCEC	0.047402628	0.797411396	0.069092647	protein_coding	protein_coding
-2.324162275	0.097865394	1.009351522	-2.302629187	0.021299716	69	530	HUWE1	MUC5B	57	UCEC	0.013534798	0.707630445	0.069092647	protein_coding	protein_coding
-1.18072604	0.307055723	0.593999578	-1.987755687	0.046838717	69	530	RYR2	MUC5B	57	UCEC	0.095850536	0.983648298	0.069092647	protein_coding	protein_coding
-1.646553195	0.192713009	0.720645245	-2.284831832	0.02232269	69	530	ZFHX4	MUC5B	57	UCEC	0.046933767	0.791291772	0.069092647	protein_coding	protein_coding
-1.599045493	0.202089322	0.720624045	-2.218973268	0.026488543	69	530	PTEN	MYO18B	57	UCEC	0.049219341	0.829757023	0.069092647	protein_coding	protein_coding
-2.329855344	0.097309823	1.009146012	-2.308739584	0.020958036	69	530	DST	NBEA	57	UCEC	0.013463385	0.703329944	0.069092647	protein_coding	protein_coding
-1.640845126	0.193816174	0.720414962	-2.277638878	0.022748102	69	530	FAT4	NEB	57	UCEC	0.047223744	0.795462319	0.069092647	protein_coding	protein_coding
-1.245315147	0.287850179	0.593956536	-2.096643561	0.03602514	69	530	PTEN	NRXN1	57	UCEC	0.089862913	0.922045842	0.069092647	protein_coding	protein_coding
-1.643434743	0.193314914	0.720377191	-2.281353107	0.022527561	69	530	TTN	PCDH11X	57	UCEC	0.047105098	0.793346307	0.069092647	protein_coding	protein_coding
-1.242617994	0.288627603	0.593632482	-2.09324461	0.036327324	69	530	PTEN	PCDHA9	57	UCEC	0.090162863	0.923949069	0.069092647	protein_coding	protein_coding
-1.617329087	0.198427976	0.720458289	-2.244861517	0.024777024	69	530	KMT2C	PDE4DIP	57	UCEC	0.048343315	0.814459284	0.069092647	protein_coding	protein_coding
-1.617356254	0.198422585	0.720434598	-2.244973047	0.024769863	69	530	TTN	PKD1L2	57	UCEC	0.048344246	0.814399341	0.069092647	protein_coding	none protein_coding
-1.204247946	0.299917469	0.593503957	-2.029047881	0.042453414	69	530	TTN	PKHD1	57	UCEC	0.093713249	0.959848144	0.069092647	protein_coding	protein_coding
-1.650927469	0.191871871	0.720333607	-2.291892885	0.021911825	69	530	TTN	PLXNA4	57	UCEC	0.046757466	0.787356932	0.069092647	protein_coding	protein_coding
-1.177079739	0.308177384	0.593591793	-1.982978459	0.047369836	69	530	MYO3A	PTEN	57	UCEC	0.096277594	0.986452776	0.069092647	protein_coding	protein_coding
-1.60682831	0.200522602	0.720140465	-2.231270688	0.025663204	69	530	TTN	RAB3GAP2	57	UCEC	0.048884074	0.822544249	0.069092647	protein_coding	protein_coding
-1.632885274	0.195365078	0.720263004	-2.26706809	0.023386067	69	530	ZFHX3	RYR1	57	UCEC	0.047615318	0.801580572	0.069092647	protein_coding	protein_coding
-1.64556517	0.192903509	0.720323313	-2.284481345	0.022343258	69	530	USH2A	RYR1	57	UCEC	0.047009815	0.791574343	0.069092647	protein_coding	protein_coding
-1.606782534	0.200531781	0.720244263	-2.230885571	0.02568871	69	530	TTN	SI	57	UCEC	0.048876367	0.82274927	0.069092647	protein_coding	protein_coding
-1.650777897	0.191900572	0.720243284	-2.291972633	0.021907222	69	530	TTN	SPEG	57	UCEC	0.04677274	0.78733531	0.069092647	protein_coding	protein_coding
-1.172813755	0.309494872	0.59345245	-1.976255646	0.04812583	69	530	PTEN	SPEN	57	UCEC	0.096715601	0.99039943	0.069092647	protein_coding	protein_coding
-1.636642944	0.194632338	0.720334436	-2.27205984	0.023082896	69	530	CSMD1	SYNE1	57	UCEC	0.04743009	0.798685962	0.069092647	protein_coding	protein_coding
-2.390585941	0.09157601	1.009296334	-2.368566951	0.017857148	69	530	DNAH5	SYNE1	57	UCEC	0.012666346	0.662082488	0.069092647	protein_coding	protein_coding
-2.393219956	0.091335115	1.009327011	-2.371104638	0.017735009	69	530	OBSCN	SYNE2	57	UCEC	0.012632267	0.660380553	0.069092647	protein_coding	protein_coding
-2.335411984	0.096770606	1.009339082	-2.313803187	0.020678521	69	530	MACF1	TENM1	57	UCEC	0.013383715	0.699697358	0.069092647	protein_coding	protein_coding
-1.722444659	0.178628927	0.720589156	-2.390328309	0.016833318	69	530	DNAH11	TENM1	57	UCEC	0.043508481	0.733381013	0.069092647	protein_coding	protein_coding
-1.689592314	0.184594765	0.720871024	-2.34382054	0.019087353	69	530	PCLO	TENM1	57	UCEC	0.044936742	0.758293242	0.069092647	protein_coding	protein_coding
-2.361185538	0.094308351	1.009123844	-2.339837229	0.019292146	69	530	NEB	TENM1	57	UCEC	0.01304868	0.681606475	0.069092647	protein_coding	protein_coding
-1.608898953	0.200107821	0.720120265	-2.23420869	0.025469345	69	530	TTN	TENM4	57	UCEC	0.048784889	0.820810318	0.069092647	protein_coding	protein_coding
-1.648731202	0.192293736	0.72041921	-2.288571957	0.022104235	69	530	DST	TNRC6B	57	UCEC	0.046852409	0.789220484	0.069092647	protein_coding	protein_coding
-1.188268036	0.304748621	0.594520206	-1.998700843	0.045640732	69	530	DST	TRRAP	57	UCEC	0.095033327	0.977254243	0.069092647	protein_coding	protein_coding
-1.188572289	0.304655914	0.594092656	-2.000651376	0.045429973	69	530	OBSCN	USH2A	57	UCEC	0.095084064	0.976138611	0.069092647	protein_coding	protein_coding
-1.61482265	0.198925947	0.720367988	-2.241663534	0.024983126	69	530	ZFHX3	USH2A	57	UCEC	0.048473215	0.816358736	0.069092647	protein_coding	protein_coding
-1.614661474	0.198958012	0.720093991	-2.242292666	0.024942463	69	530	TTN	WDR87	57	UCEC	0.048507071	0.816051958	0.069092647	protein_coding	protein_coding
-2.412735952	0.0895699	1.009387879	-2.390296141	0.016834792	69	530	NRK	ZFHX3	57	UCEC	0.012386648	0.647694782	0.069092647	protein_coding	protein_coding
-2.284400199	0.101835125	1.009107791	-2.263782145	0.023587517	69	530	LRP1B	ZFHX4	57	UCEC	0.014090542	0.735982506	0.069092647	protein_coding	protein_coding
-1.56748441	0.208569198	0.720358743	-2.175977489	0.029556944	69	530	LRP2	ZFHX4	57	UCEC	0.050823952	0.855917511	0.069092647	protein_coding	protein_coding
-2.41928323	0.088985377	1.009185435	-2.397263324	0.016518048	69	530	MUC16	ZNF292	57	UCEC	0.012310697	0.643212725	0.069092647	protein_coding	protein_coding
-2.359847716	0.094434603	1.009625437	-2.337349703	0.019421008	69	530	PTEN	ZNF462	57	UCEC	0.01305331	0.683190283	0.069092647	protein_coding	protein_coding
-1.248782893	0.286853716	0.593654443	-2.103551835	0.035417559	68	530	KMT2D	ABCA13	57	UCEC	0.089604871	0.918310065	0.069092647	protein_coding	protein_coding
-2.344537826	0.09589151	1.009206954	-2.323148703	0.020171165	68	530	ZFHX3	ANK2	57	UCEC	0.013265568	0.693161545	0.069092647	protein_coding	protein_coding
-2.281412929	0.102139788	1.009112399	-2.260811512	0.023770931	68	530	HUWE1	ANK2	57	UCEC	0.01413257	0.738191039	0.069092647	protein_coding	protein_coding
-1.744832082	0.174674318	0.720612911	-2.421316707	0.015464398	68	530	ZFHX3	ANK3	57	UCEC	0.042543279	0.717178314	0.069092647	protein_coding	protein_coding
-1.776978155	0.169148516	0.720753028	-2.465446675	0.013684254	68	530	DNAH3	ARID1A	57	UCEC	0.041186115	0.694681216	0.069092647	protein_coding	protein_coding
-2.354753623	0.094916889	1.009462844	-2.332679838	0.019664955	68	530	GPR98	ARID1A	57	UCEC	0.013124156	0.686460599	0.069092647	protein_coding	protein_coding
-2.384917906	0.09209654	1.009471184	-2.362541837	0.018150093	68	530	NRK	ARID1A	57	UCEC	0.012733978	0.666074079	0.069092647	protein_coding	protein_coding
-1.498795751	0.223399026	0.720078183	-2.081434748	0.037394131	68	530	FCGBP	ARID1A	57	UCEC	0.054467614	0.916271544	0.069092647	protein_coding	protein_coding
-1.653957309	0.19129141	0.720484002	-2.295619757	0.021697632	68	530	MED13L	ARID1A	57	UCEC	0.046602273	0.7852064	0.069092647	protein_coding	protein_coding
-2.283165044	0.101960984	1.009222017	-2.262302056	0.023678748	68	530	DYNC2H1	ARID1A	57	UCEC	0.014104799	0.737057117	0.069092647	protein_coding	protein_coding
-1.684998703	0.185444673	0.721048423	-2.336873153	0.019445781	68	530	CSMD2	ARID1A	57	UCEC	0.045127944	0.762049479	0.069092647	protein_coding	protein_coding
-2.24740427	0.105673168	1.009051387	-2.227244617	0.02593093	68	530	DNAH14	ARID1A	57	UCEC	0.014623214	0.763636375	0.069092647	protein_coding	protein_coding
-1.67317618	0.187650108	0.720491978	-2.322268992	0.020218456	68	530	TTN	ARID5B	57	UCEC	0.045714467	0.770271751	0.069092647	protein_coding	protein_coding
-2.25694812	0.104669436	1.009126834	-2.236535629	0.025316706	68	530	CSMD3	ASH1L	57	UCEC	0.014482175	0.756494872	0.069092647	protein_coding	protein_coding
-1.592534808	0.203409354	0.720699415	-2.209707368	0.027125478	68	530	PTEN	ATP2B3	57	UCEC	0.04953352	0.83530032	0.069092647	protein_coding	protein_coding
-1.646529446	0.192717586	0.720517415	-2.285204231	0.022300855	68	530	PCLO	ATRX	57	UCEC	0.046946643	0.791112329	0.069092647	protein_coding	protein_coding
-2.387695729	0.091841067	1.009603716	-2.364983102	0.018030894	68	530	TTN	BRWD3	57	UCEC	0.012695356	0.664398974	0.069092647	protein_coding	protein_coding
-2.397984712	0.09090096	1.009325974	-2.375827803	0.017509632	68	530	MUC5B	CACNA1E	57	UCEC	0.012572246	0.65724015	0.069092647	protein_coding	protein_coding
-1.699603318	0.182756006	0.72047075	-2.359017791	0.018323377	68	530	DNAH11	CACNA1E	57	UCEC	0.044524041	0.750151084	0.069092647	protein_coding	protein_coding
-2.366759676	0.093784125	1.009188425	-2.345210882	0.019016321	68	530	TTN	CAMSAP2	57	UCEC	0.012974505	0.677903479	0.069092647	protein_coding	protein_coding
-2.184967626	0.112481375	1.008957622	-2.165569275	0.030344116	68	530	PTEN	CELSR2	57	UCEC	0.015568205	0.812685822	0.069092647	protein_coding	protein_coding
-1.603986491	0.201093261	0.720078484	-2.227516205	0.025912794	68	530	PTEN	CHL1	57	UCEC	0.049029147	0.824784892	0.069092647	protein_coding	protein_coding
-1.636413824	0.194676938	0.720165747	-2.272273892	0.023069973	68	530	TTN	CMYA5	57	UCEC	0.047456647	0.79860489	0.069092647	protein_coding	protein_coding
-1.652519786	0.191566593	0.720127632	-2.294759584	0.021746906	68	530	PTEN	CMYA5	57	UCEC	0.046701923	0.785786913	0.069092647	protein_coding	protein_coding
-1.609916979	0.19990421	0.72049653	-2.234454869	0.025453159	68	530	DST	CSMD1	57	UCEC	0.048699322	0.820580075	0.069092647	protein_coding	protein_coding
-2.291011147	0.101164118	1.009109732	-2.270329058	0.023187625	68	530	PTEN	CUX1	57	UCEC	0.013997644	0.731135793	0.069092647	protein_coding	protein_coding
-1.562278145	0.209657896	0.720415455	-2.168579442	0.030114627	68	530	PDE4DIP	DMD	57	UCEC	0.051083566	0.860480905	0.069092647	protein_coding	protein_coding
-1.184706463	0.30583594	0.593957895	-1.99459671	0.046086883	68	530	HUWE1	DMD	57	UCEC	0.095477569	0.979660703	0.069092647	protein_coding	protein_coding
-1.594424915	0.203025252	0.720526635	-2.212860479	0.026907266	68	530	DST	DMXL2	57	UCEC	0.049456731	0.833440712	0.069092647	protein_coding	protein_coding
-1.601327141	0.201628751	0.720164449	-2.223557609	0.026178223	68	530	MUC16	DNAH2	57	UCEC	0.049151424	0.827120555	0.069092647	protein_coding	protein_coding
-1.208716252	0.298580336	0.593784151	-2.03561555	0.041788975	68	530	PIK3CA	DNAH2	57	UCEC	0.093244222	0.956093741	0.069092647	protein_coding	protein_coding
-2.314130404	0.098852108	1.00922613	-2.292975118	0.021849438	68	530	ZFHX4	DNAH7	57	UCEC	0.013674621	0.714589384	0.069092647	protein_coding	protein_coding
-2.306518635	0.099607418	1.009219037	-2.285448997	0.022286514	68	530	DNAH5	DNAH7	57	UCEC	0.013779298	0.720039417	0.069092647	protein_coding	protein_coding
-2.413002747	0.089546006	1.009274075	-2.390830009	0.016810334	68	530	ZFHX3	DNAH8	57	UCEC	0.012386106	0.647377586	0.069092647	protein_coding	protein_coding
-2.317043477	0.098564564	1.009162646	-2.296005986	0.021675539	68	530	TTN	DOCK1	57	UCEC	0.013636541	0.712422111	0.069092647	protein_coding	protein_coding
-1.205131632	0.299652553	0.593639759	-2.030072302	0.042349191	68	530	TTN	DOCK4	57	UCEC	0.093605554	0.959255607	0.069092647	protein_coding	protein_coding
-1.63598442	0.194760551	0.720392086	-2.270963898	0.023149164	68	530	DNAH5	DST	57	UCEC	0.047455972	0.799302401	0.069092647	protein_coding	protein_coding
-1.172470962	0.309600983	0.593836366	-1.974400744	0.048336194	68	530	COL6A3	DST	57	UCEC	0.096675986	0.991484776	0.069092647	protein_coding	protein_coding
-1.578938347	0.206193888	0.72023509	-2.192254126	0.028361162	68	530	MUC16	DYNC1H1	57	UCEC	0.050257317	0.845964763	0.069092647	protein_coding	protein_coding
-1.548206192	0.212629048	0.720181885	-2.149743314	0.031575524	68	530	KMT2D	DYNC2H1	57	UCEC	0.051831216	0.872275733	0.069092647	protein_coding	protein_coding
-1.579726361	0.206031469	0.720256391	-2.193283366	0.028286969	68	530	SYNE1	DYNC2H1	57	UCEC	0.050215633	0.845333686	0.069092647	protein_coding	protein_coding
-2.4198053	0.088938932	1.009387048	-2.397301714	0.016516318	68	530	TTN	FAM135B	57	UCEC	0.012299411	0.643131101	0.069092647	protein_coding	protein_coding
-1.663917232	0.189395619	0.720368412	-2.309814261	0.020898439	68	530	ABCA13	FAT1	57	UCEC	0.046150877	0.777248512	0.069092647	protein_coding	protein_coding
-1.207049233	0.29907849	0.593724119	-2.033013639	0.042051145	68	530	KMT2C	FAT1	57	UCEC	0.093410782	0.957576219	0.069092647	protein_coding	protein_coding
-2.351708503	0.095206363	1.009245953	-2.330163917	0.019797489	68	530	RYR3	FAT1	57	UCEC	0.013169779	0.688261494	0.069092647	protein_coding	protein_coding
-1.605158135	0.20085779	0.720264085	-2.228568895	0.025842603	68	530	SACS	FAT1	57	UCEC	0.048953924	0.824118846	0.069092647	protein_coding	protein_coding
-1.213564946	0.297136115	0.593785484	-2.043776716	0.04097561	68	530	DNAH11	FAT1	57	UCEC	0.092792961	0.95147164	0.069092647	protein_coding	protein_coding
-1.625784215	0.196757315	0.720229318	-2.257314684	0.023988418	68	530	PCLO	FAT1	57	UCEC	0.047957807	0.8072396	0.069092647	protein_coding	protein_coding
-1.623371487	0.19723261	0.720337174	-2.253627253	0.024219627	68	530	ANK2	FAT1	57	UCEC	0.048063494	0.809360681	0.069092647	protein_coding	protein_coding
-1.653518244	0.191375417	0.720263667	-2.295712417	0.02169233	68	530	MDN1	FAT1	57	UCEC	0.046642878	0.785212061	0.069092647	protein_coding	protein_coding
-1.649061835	0.192230168	0.720421655	-2.289023135	0.022078008	68	530	NEB	FAT2	57	UCEC	0.046836696	0.788963365	0.069092647	protein_coding	protein_coding
-1.183909911	0.306079652	0.593821804	-1.993712428	0.04618349	68	530	ZFHX3	FAT2	57	UCEC	0.095579143	0.980179878	0.069092647	protein_coding	protein_coding
-1.663324708	0.189507873	0.720962271	-2.307089808	0.021049814	68	530	KMT2D	FBN2	57	UCEC	0.046124512	0.77861494	0.069092647	protein_coding	protein_coding
-1.534493523	0.215564842	0.720131596	-2.130851544	0.033101374	68	530	OBSCN	FLG	57	UCEC	0.052552035	0.884232188	0.069092647	protein_coding	protein_coding
-2.346470744	0.095706339	1.00924199	-2.324983273	0.020072855	68	530	PTEN	FMR1	57	UCEC	0.013239043	0.691870524	0.069092647	protein_coding	protein_coding
-2.422633009	0.088687794	1.009590993	-2.399618287	0.016412176	68	530	PTEN	FRAS1	57	UCEC	0.012259779	0.641571487	0.069092647	protein_coding	protein_coding
-1.609763057	0.199934982	0.72035509	-2.234679921	0.02543837	68	530	HUWE1	GPR98	57	UCEC	0.048720323	0.820478904	0.069092647	protein_coding	protein_coding
-2.32483318	0.097799758	1.009247248	-2.30353185	0.021248937	68	530	ZFHX4	GPR98	57	UCEC	0.013528485	0.707011339	0.069092647	protein_coding	protein_coding
-1.550127704	0.212220871	0.720111112	-2.152622947	0.031348324	68	530	PTEN	GRIA4	57	UCEC	0.051738894	0.870480497	0.069092647	protein_coding	protein_coding
-1.561821487	0.20975366	0.72083447	-2.166685352	0.030258854	68	530	PTEN	HELZ	57	UCEC	0.051064944	0.861581241	0.069092647	protein_coding	protein_coding
-1.625934212	0.196727804	0.720178644	-2.257681792	0.023965505	68	530	FLG	HMCN1	57	UCEC	0.047955377	0.807038367	0.069092647	protein_coding	protein_coding
-1.212516479	0.297447815	0.593764224	-2.042084098	0.04114319	68	530	DNAH10	HMCN1	57	UCEC	0.092894173	0.952430061	0.069092647	protein_coding	protein_coding
-1.581094473	0.205749787	0.720134126	-2.195555544	0.028123771	68	530	OBSCN	IGF2R	57	UCEC	0.050158998	0.843975692	0.069092647	protein_coding	protein_coding
-1.629822708	0.195964314	0.720228633	-2.262924068	0.02364037	68	530	PIK3CA	IGF2R	57	UCEC	0.047764584	0.803985064	0.069092647	protein_coding	protein_coding
-1.237070797	0.290233126	0.593823762	-2.083228859	0.037230368	68	530	PTEN	KIAA2018	57	UCEC	0.090630419	0.929437026	0.069092647	protein_coding	protein_coding
-1.618205272	0.198254192	0.720171954	-2.246970688	0.0246419	68	530	ZFHX3	KIAA2022	57	UCEC	0.048328091	0.813289421	0.069092647	protein_coding	protein_coding
-1.484456	0.226625592	0.721066734	-2.058694334	0.039523529	68	530	MACF1	KMT2B	57	UCEC	0.055147338	0.931308026	0.069092647	protein_coding	protein_coding
-2.265170376	0.103812346	1.009773918	-2.243245082	0.024881015	68	530	DST	KMT2B	57	UCEC	0.014345381	0.751252477	0.069092647	protein_coding	protein_coding
-2.30346483	0.099912065	1.009181447	-2.282508103	0.02245936	68	530	CSMD3	KMT2C	57	UCEC	0.01382246	0.722188428	0.069092647	protein_coding	protein_coding
-1.585159621	0.204915082	0.720129463	-2.201214786	0.027720822	68	530	LRP1B	KMT2D	57	UCEC	0.049955965	0.840544087	0.069092647	protein_coding	protein_coding
-2.360269841	0.094394748	1.009377207	-2.338342717	0.019369477	68	530	CACNA1D	KMT2D	57	UCEC	0.01305415	0.68256978	0.069092647	protein_coding	protein_coding
-1.682425637	0.185922448	0.720338505	-2.3356042	0.019511879	68	530	PTEN	LAMA1	57	UCEC	0.04530721	0.762950468	0.069092647	protein_coding	protein_coding
-2.294318595	0.100830076	1.009021523	-2.273805407	0.022977689	68	530	TTN	LRRC7	57	UCEC	0.013953837	0.728595617	0.069092647	protein_coding	protein_coding
-1.620744669	0.197751385	0.72044649	-2.249639204	0.024471858	68	530	RYR3	MACF1	57	UCEC	0.04817959	0.811663407	0.069092647	protein_coding	protein_coding
-1.607721781	0.200343521	0.720298765	-2.232020737	0.025613592	68	530	AHNAK	MACF1	57	UCEC	0.048825266	0.82206468	0.069092647	protein_coding	protein_coding
-2.288949465	0.101372902	1.009129395	-2.26824179	0.023314474	68	530	PCDH15	MACF1	57	UCEC	0.014025992	0.732672954	0.069092647	protein_coding	protein_coding
-2.362637006	0.094171565	1.009721183	-2.339890503	0.019289394	68	530	PDE4DIP	MACF1	57	UCEC	0.013014508	0.681415186	0.069092647	protein_coding	protein_coding
-2.295523562	0.100708652	1.009057517	-2.27491845	0.022910822	68	530	PTEN	MAP1B	57	UCEC	0.01393605	0.727769553	0.069092647	protein_coding	protein_coding
-1.622267952	0.197450383	0.720532107	-2.251486	0.024354773	68	530	ARID1A	MGA	57	UCEC	0.048098183	0.810563964	0.069092647	protein_coding	protein_coding
-1.639366883	0.194102893	0.720565032	-2.275113015	0.022899151	68	530	DST	MGA	57	UCEC	0.047279696	0.796873431	0.069092647	protein_coding	protein_coding
-1.632955594	0.195351341	0.720315884	-2.266999285	0.023390269	68	530	DST	MKI67	57	UCEC	0.047607035	0.801607284	0.069092647	protein_coding	protein_coding
-2.317869058	0.098483224	1.00914587	-2.296862255	0.021626629	68	530	MUC16	MKI67	57	UCEC	0.013625735	0.711810786	0.069092647	protein_coding	protein_coding
-1.625731971	0.196767594	0.720201401	-2.257329642	0.023987485	68	530	FAT3	MUC16	57	UCEC	0.047962937	0.807237605	0.069092647	protein_coding	protein_coding
-2.335089939	0.096801776	1.009370584	-2.313411917	0.020700002	68	530	COL6A3	MUC16	57	UCEC	0.0133872	0.699965946	0.069092647	protein_coding	protein_coding
-2.26296218	0.104041837	1.009238507	-2.242247162	0.024945403	68	530	CSMD3	MUC5B	57	UCEC	0.014392189	0.752123526	0.069092647	protein_coding	protein_coding
-1.640939253	0.193797932	0.720630841	-2.277087184	0.02278102	68	530	FAT4	MUC5B	57	UCEC	0.047199324	0.795724066	0.069092647	protein_coding	protein_coding
-1.576624033	0.206671638	0.720305322	-2.188827412	0.028609387	68	530	PTEN	MYCBP2	57	UCEC	0.05036683	0.848041587	0.069092647	protein_coding	protein_coding
-1.638376183	0.194295286	0.720292834	-2.274597366	0.022930094	68	530	TTN	MYCBP2	57	UCEC	0.047351815	0.797237838	0.069092647	protein_coding	protein_coding
-1.642785663	0.193440431	0.720273736	-2.280779628	0.02256149	68	530	DNAH5	NEB	57	UCEC	0.047145242	0.793700462	0.069092647	protein_coding	protein_coding
-2.357472453	0.094659177	1.009322118	-2.335698793	0.019506945	68	530	RYR2	NEB	57	UCEC	0.013092132	0.684407964	0.069092647	protein_coding	protein_coding
-1.566168464	0.208843844	0.720337942	-2.174213479	0.029689107	68	530	ARID1A	NHS	57	UCEC	0.050892952	0.857009653	0.069092647	protein_coding	protein_coding
-2.286076372	0.101664574	1.009180706	-2.265279507	0.023495533	68	530	PIK3CA	PCDH15	57	UCEC	0.014064934	0.734854919	0.069092647	protein_coding	protein_coding
-1.662662014	0.189633501	0.72028798	-2.308329528	0.020980815	68	530	DNAH5	PCLO	57	UCEC	0.046216128	0.778102067	0.069092647	protein_coding	protein_coding
-1.613962601	0.199097106	0.720494614	-2.240075874	0.025085998	68	530	PTEN	PDS5B	57	UCEC	0.048502883	0.817263955	0.069092647	protein_coding	protein_coding
-1.644792867	0.193052546	0.720433125	-2.283061133	0.022426768	68	530	TTN	PKHD1L1	57	UCEC	0.04703601	0.792356437	0.069092647	protein_coding	protein_coding
-1.191533841	0.303754995	0.593579007	-2.007371937	0.044710075	68	530	TTN	PRRC2C	57	UCEC	0.094898375	0.972272672	0.069092647	protein_coding	protein_coding
-1.645292693	0.192956078	0.720129316	-2.284718393	0.022329345	68	530	TTN	PTPRD	57	UCEC	0.047040509	0.79148905	0.069092647	protein_coding	protein_coding
-1.643202428	0.193359829	0.72020583	-2.281573349	0.022514542	68	530	MACF1	RYR1	57	UCEC	0.04713187	0.793264158	0.069092647	protein_coding	protein_coding
-1.588510169	0.204229653	0.720284985	-2.205391204	0.027426655	68	530	OBSCN	RYR1	57	UCEC	0.04977369	0.837987915	0.069092647	protein_coding	protein_coding
-2.351143408	0.095260179	1.009209449	-2.329688262	0.019822633	68	530	SYNE1	RYR1	57	UCEC	0.013178166	0.688601268	0.069092647	protein_coding	protein_coding
-2.278884188	0.1023984	1.009172406	-2.258171324	0.02393498	68	530	PTEN	SCAF4	57	UCEC	0.014166686	0.740147142	0.069092647	protein_coding	protein_coding
-2.330560401	0.097241238	1.009097136	-2.30955011	0.020913074	68	530	PTEN	SETX	57	UCEC	0.013455184	0.702766905	0.069092647	protein_coding	protein_coding
-1.526187109	0.21736287	0.719933547	-2.119899977	0.034014481	68	530	PTEN	SHANK2	57	UCEC	0.053010946	0.891261541	0.069092647	protein_coding	protein_coding
-1.17665954	0.308306907	0.593649673	-1.982077297	0.04747059	68	530	PTEN	SRCAP	57	UCEC	0.096307132	0.986979332	0.069092647	protein_coding	protein_coding
-1.178091834	0.307865637	0.593568341	-1.984761909	0.047170967	68	530	TTN	SRCAP	57	UCEC	0.096184623	0.985409602	0.069092647	protein_coding	protein_coding
-1.674163441	0.187464939	0.720474973	-2.323694096	0.020141895	68	530	TTN	SYCP2	57	UCEC	0.04567088	0.76948602	0.069092647	protein_coding	protein_coding
-1.605684211	0.200752151	0.720191133	-2.229525104	0.025778987	68	530	LRP1B	SYNE1	57	UCEC	0.048935174	0.823567644	0.069092647	protein_coding	protein_coding
-1.686955007	0.185082241	0.720590791	-2.341072114	0.019228453	68	530	DNAH2	SYNE1	57	UCEC	0.045080164	0.75987825	0.069092647	protein_coding	protein_coding
-2.261904626	0.104151925	1.009225007	-2.241229271	0.025011228	68	530	ASH1L	SYNE2	57	UCEC	0.014407799	0.752899435	0.069092647	protein_coding	protein_coding
-1.608831793	0.200121261	0.720350933	-2.233400025	0.025522577	68	530	KMT2D	SYNE2	57	UCEC	0.048766113	0.821236651	0.069092647	protein_coding	protein_coding
-1.562133281	0.20968827	0.720125516	-2.169251397	0.030063603	68	530	RYR2	TAF1	57	UCEC	0.051120009	0.86011664	0.069092647	protein_coding	protein_coding
-2.341479427	0.096185234	1.009292957	-2.319920507	0.020345178	68	530	USH2A	TENM1	57	UCEC	0.013303959	0.695401966	0.069092647	protein_coding	protein_coding
-2.369049278	0.093569643	1.009441565	-2.346890955	0.018930794	68	530	ASPM	TENM1	57	UCEC	0.012938412	0.676688784	0.069092647	protein_coding	protein_coding
-2.365055269	0.093944108	1.009427581	-2.342966761	0.019131087	68	530	FAT4	TENM1	57	UCEC	0.012990547	0.679378268	0.069092647	protein_coding	protein_coding
-2.287288028	0.101541466	1.009182278	-2.26647661	0.023422218	68	530	FLG	TENM1	57	UCEC	0.014047859	0.733967328	0.069092647	protein_coding	protein_coding
-2.332707409	0.097032684	1.009167276	-2.311517094	0.02080431	68	530	OBSCN	TENM1	57	UCEC	0.013424481	0.701356089	0.069092647	protein_coding	protein_coding
-2.393004586	0.091354788	1.009284842	-2.370990316	0.017740496	68	530	AKAP6	TTN	57	UCEC	0.012636032	0.660468204	0.069092647	protein_coding	protein_coding
-2.311973907	0.099065512	1.009272302	-2.290733533	0.02197883	68	530	CSMD3	USH2A	57	UCEC	0.013702902	0.716196868	0.069092647	protein_coding	protein_coding
-2.347207739	0.09563583	1.009328826	-2.325513428	0.020044523	68	530	DNAH5	USH2A	57	UCEC	0.013227038	0.691478487	0.069092647	protein_coding	protein_coding
-1.652832533	0.191506691	0.720491571	-2.294034517	0.021788516	68	530	ZFHX4	USH2A	57	UCEC	0.046654028	0.786101741	0.069092647	protein_coding	protein_coding
-1.710889343	0.180705012	0.720324009	-2.375166344	0.017541043	68	530	ATRX	ZFHX3	57	UCEC	0.04403703	0.741519155	0.069092647	protein_coding	protein_coding
-2.41428792	0.089430998	1.009422775	-2.391750989	0.016768215	68	530	MACF1	ZNF292	57	UCEC	0.012366593	0.646734592	0.069092647	protein_coding	protein_coding
-2.281339	0.10214734	1.009071411	-2.26083008	0.023769781	68	530	PTEN	ZXDB	57	UCEC	0.01413475	0.73818631	0.069092647	protein_coding	protein_coding
-1.544624508	0.213391983	0.720121992	-2.144948391	0.031956974	67	530	DST	ABCA12	57	UCEC	0.052023299	0.875302793	0.069092647	protein_coding	protein_coding
-2.403107055	0.090436525	1.009435653	-2.380644122	0.017282399	67	530	ZFHX4	ABCA13	57	UCEC	0.012505322	0.654022729	0.069092647	protein_coding	protein_coding
-1.612186536	0.19945103	0.720243897	-2.238389722	0.025195652	67	530	MUC16	AHNAK	57	UCEC	0.048612986	0.818314536	0.069092647	protein_coding	protein_coding
-1.63007502	0.195914876	0.720223883	-2.263289315	0.023617861	67	530	ZFHX3	AHNAK	57	UCEC	0.047752979	0.803774752	0.069092647	protein_coding	protein_coding
-1.178064859	0.307873942	0.593799208	-1.983944812	0.047261993	67	530	PTEN	AKAP13	57	UCEC	0.096143702	0.985882194	0.069092647	protein_coding	protein_coding
-2.28479327	0.101795104	1.009122233	-2.264139264	0.023565551	67	530	NEB	ANK2	57	UCEC	0.014084606	0.735714095	0.069092647	protein_coding	protein_coding
-2.299413135	0.100317699	1.009180811	-2.278494705	0.02269712	67	530	DNAH5	ANK2	57	UCEC	0.013878595	0.725119548	0.069092647	protein_coding	protein_coding
-2.257463564	0.104615499	1.009119003	-2.237063772	0.025282172	67	530	ASH1L	ANK2	57	UCEC	0.014474934	0.756093436	0.069092647	protein_coding	protein_coding
-2.309254372	0.099335291	1.009321927	-2.287926489	0.022141802	67	530	MACF1	ANK2	57	UCEC	0.013738882	0.718217095	0.069092647	protein_coding	protein_coding
-1.668633738	0.188504436	0.720541429	-2.315805409	0.020568896	67	530	ATRX	ANK3	57	UCEC	0.045918144	0.773853626	0.069092647	protein_coding	protein_coding
-1.634424562	0.195064587	0.720229823	-2.269309752	0.023249496	67	530	MUC16	ANK3	57	UCEC	0.047545173	0.800295609	0.069092647	protein_coding	protein_coding
-1.677260109	0.186885321	0.720370018	-2.328331367	0.019894515	67	530	ZFHX4	ANK3	57	UCEC	0.045539038	0.766949076	0.069092647	protein_coding	protein_coding
-2.39222435	0.091426094	1.009391251	-2.369967392	0.017789654	67	530	HUWE1	ANK3	57	UCEC	0.012643258	0.661121596	0.069092647	protein_coding	protein_coding
-2.274671934	0.102830638	1.00939579	-2.253498536	0.024227733	67	530	TTN	ARHGAP5	57	UCEC	0.014220258	0.743596904	0.069092647	protein_coding	protein_coding
-1.628229814	0.196276713	0.720379138	-2.2602401	0.023806353	67	530	MKI67	ARID1A	57	UCEC	0.047826618	0.805504327	0.069092647	protein_coding	protein_coding
-1.519949603	0.21872291	0.720205666	-2.110438273	0.034820623	67	530	CIT	ARID1A	57	UCEC	0.053314192	0.897316625	0.069092647	protein_coding	protein_coding
-1.209201457	0.298435498	0.594068561	-2.035457751	0.041804835	67	530	AKAP9	ARID1A	57	UCEC	0.093147051	0.956162809	0.069092647	protein_coding	protein_coding
-1.486633691	0.226132608	0.720138321	-2.064372424	0.038982419	67	530	VPS13D	ARID1A	57	UCEC	0.055127599	0.927592664	0.069092647	protein_coding	protein_coding
-2.48310103	0.083483938	1.009701688	-2.459242229	0.013923064	67	530	MUC17	ARID1A	57	UCEC	0.011537919	0.6040576	0.069092647	protein_coding	protein_coding
-1.598021045	0.202296458	0.720503744	-2.217921917	0.026560157	67	530	TG	ARID1A	57	UCEC	0.049281408	0.830411675	0.069092647	protein_coding	protein_coding
-2.343386889	0.096001939	1.00943218	-2.321490175	0.020260404	67	530	KMT2D	ATM	57	UCEC	0.013274983	0.694266202	0.069092647	protein_coding	protein_coding
-2.373842173	0.093122246	1.009428245	-2.351670052	0.018689345	67	530	PCLO	ATM	57	UCEC	0.012876884	0.673435663	0.069092647	protein_coding	protein_coding
-1.689488493	0.184613931	0.720599503	-2.344559613	0.019049565	67	530	RYR2	ATRX	57	UCEC	0.044965331	0.757968489	0.069092647	protein_coding	protein_coding
-2.333481484	0.096957602	1.009241491	-2.312114103	0.020771396	67	530	DST	BIRC6	57	UCEC	0.013412143	0.700915345	0.069092647	protein_coding	protein_coding
-2.381875444	0.092377167	1.009251119	-2.360042411	0.018272846	67	530	ZFHX4	CACNA1E	57	UCEC	0.01277829	0.66781556	0.069092647	protein_coding	protein_coding
-2.339316049	0.096393544	1.0092078	-2.317972622	0.020450809	67	530	HUWE1	CACNA1E	57	UCEC	0.013334997	0.696791702	0.069092647	protein_coding	protein_coding
-2.315009683	0.098765228	1.009128038	-2.294069332	0.021786517	67	530	RYR3	CACNA1E	57	UCEC	0.01366523	0.713824083	0.069092647	protein_coding	protein_coding
-2.293140835	0.1009489	1.00912428	-2.27240676	0.023061954	67	530	NEB	CACNA1E	57	UCEC	0.013967467	0.729601163	0.069092647	protein_coding	protein_coding
-2.342526262	0.096084597	1.009433559	-2.320634421	0.020306583	67	530	DST	CEP290	57	UCEC	0.013286377	0.694865841	0.069092647	protein_coding	protein_coding
-1.204036632	0.299980852	0.593700818	-2.028019155	0.042558293	67	530	TTN	CNOT1	57	UCEC	0.093696894	0.960421501	0.069092647	protein_coding	protein_coding
-1.200042267	0.301181482	0.59393886	-2.020481144	0.043333504	67	530	PTEN	CNOT1	57	UCEC	0.094028022	0.96471544	0.069092647	protein_coding	protein_coding
-1.200941029	0.300910913	0.59387377	-2.022215984	0.043154044	67	530	PCLO	CSMD1	57	UCEC	0.093955537	0.963725823	0.069092647	protein_coding	protein_coding
-1.534955786	0.215465218	0.72025402	-2.131131161	0.033078338	67	530	OBSCN	CSMD3	57	UCEC	0.052515145	0.884035634	0.069092647	protein_coding	protein_coding
-1.576385271	0.20672099	0.720457233	-2.188034486	0.02866709	67	530	RYR2	CSMD3	57	UCEC	0.050363859	0.848496691	0.069092647	protein_coding	protein_coding
-2.349353559	0.095430833	1.009226927	-2.327874431	0.019918772	67	530	DNAH5	CSMD3	57	UCEC	0.013201322	0.689858496	0.069092647	protein_coding	protein_coding
-2.343448124	0.095996061	1.009124132	-2.322259521	0.020218966	67	530	MUC16	CTCF	57	UCEC	0.013282188	0.693804662	0.069092647	protein_coding	protein_coding
-1.55983226	0.210171322	0.720087604	-2.166170133	0.030298188	67	530	MUC5B	CTCF	57	UCEC	0.05124158	0.862034007	0.069092647	protein_coding	protein_coding
-2.323249425	0.097954771	1.009292426	-2.301859564	0.021343093	67	530	MUC16	DCHS1	57	UCEC	0.013548728	0.708194668	0.069092647	protein_coding	protein_coding
-1.631150193	0.195704347	0.720537892	-2.26379516	0.023586716	67	530	LRP1B	DMD	57	UCEC	0.047672314	0.803405329	0.069092647	protein_coding	protein_coding
-2.230964056	0.107424817	1.009105672	-2.210832937	0.027047408	67	530	ASH1L	DMD	57	UCEC	0.014864029	0.776377088	0.069092647	protein_coding	protein_coding
-1.630462108	0.195839054	0.720330223	-2.263492571	0.023605342	67	530	DNAH10	DMD	57	UCEC	0.04772455	0.80363116	0.069092647	protein_coding	protein_coding
-1.685593508	0.185334402	0.720581434	-2.339213069	0.019324409	67	530	PCLO	DNAH10	57	UCEC	0.04514241	0.760899573	0.069092647	protein_coding	protein_coding
-2.411936905	0.089641499	1.009451041	-2.389355012	0.016877984	67	530	ZFHX4	DNAH10	57	UCEC	0.012395014	0.64829278	0.069092647	protein_coding	protein_coding
-1.213505018	0.297153922	0.593946749	-2.043120903	0.041040471	67	530	KMT2C	DNAH11	57	UCEC	0.092769195	0.951829468	0.069092647	protein_coding	protein_coding
-1.657408048	0.19063245	0.72055012	-2.300198142	0.021436997	67	530	PCLO	DNAH8	57	UCEC	0.04643572	0.78260294	0.069092647	protein_coding	protein_coding
-1.574421376	0.207127367	0.720352669	-2.185625798	0.028842994	67	530	PTEN	DSCAM	57	UCEC	0.050473209	0.849990467	0.069092647	protein_coding	protein_coding
-1.552607188	0.211695324	0.720579082	-2.154665915	0.031187987	67	530	PIK3CA	DYNC2H1	57	UCEC	0.05156345	0.86912164	0.069092647	protein_coding	protein_coding
-2.2664886	0.103675588	1.009180764	-2.245869799	0.024712349	67	530	MUC16	DYNC2H1	57	UCEC	0.014343149	0.749391075	0.069092647	protein_coding	protein_coding
-1.565165091	0.209053497	0.720138945	-2.173420979	0.029748647	67	530	PTEN	EP400	57	UCEC	0.050963916	0.857535451	0.069092647	protein_coding	protein_coding
-2.377951218	0.092740388	1.009253031	-2.356149691	0.018465475	67	530	CACNA1E	FAT1	57	UCEC	0.012828485	0.670443881	0.069092647	protein_coding	protein_coding
-2.318607905	0.098410487	1.009119348	-2.297654791	0.021581445	67	530	TAF1	FAT1	57	UCEC	0.01361638	0.711248088	0.069092647	protein_coding	protein_coding
-2.364188954	0.094025528	1.009220073	-2.342590102	0.019150409	67	530	USP9X	FAT1	57	UCEC	0.013007095	0.679690582	0.069092647	protein_coding	protein_coding
-2.298855611	0.100373645	1.00914124	-2.278031576	0.022724696	67	530	FLG	FAT1	57	UCEC	0.013887412	0.725467663	0.069092647	protein_coding	protein_coding
-2.318444757	0.098426544	1.009217132	-2.297270512	0.021603343	67	530	DMD	FAT1	57	UCEC	0.013615991	0.711500486	0.069092647	protein_coding	protein_coding
-2.328534804	0.097438409	1.009404937	-2.306839126	0.02106379	67	530	MUC16	FAT2	57	UCEC	0.013474335	0.704616831	0.069092647	protein_coding	protein_coding
-1.228545763	0.29271795	0.594117193	-2.067850883	0.038654047	67	530	RYR2	FAT4	57	UCEC	0.091353794	0.937933654	0.069092647	protein_coding	protein_coding
-1.209592794	0.298318732	0.593956659	-2.036500098	0.041700163	67	530	RYR3	FAT4	57	UCEC	0.093131031	0.955579093	0.069092647	protein_coding	protein_coding
-1.522800177	0.218100312	0.720554287	-2.113373281	0.034568831	67	530	PIK3CA	FBN2	57	UCEC	0.053126119	0.895373996	0.069092647	protein_coding	protein_coding
-1.595002953	0.202907929	0.720317216	-2.214306304	0.026807715	67	530	FAT4	FLG	57	UCEC	0.049448444	0.832617265	0.069092647	protein_coding	protein_coding
-1.61589813	0.198712121	0.720938724	-2.241380683	0.025001427	67	530	TTN	FLNB	57	UCEC	0.048366975	0.816393973	0.069092647	protein_coding	protein_coding
-1.17388646	0.309163054	0.593609214	-1.977540832	0.04798053	67	530	PTEN	FRY	57	UCEC	0.096582229	0.989641622	0.069092647	protein_coding	protein_coding
-2.353607963	0.095025694	1.009495588	-2.331469292	0.019728627	67	530	PIK3CA	GPR112	57	UCEC	0.013138357	0.687291608	0.069092647	protein_coding	protein_coding
-1.621110434	0.197679068	0.720272262	-2.250691189	0.024405103	67	530	PTEN	HECW2	57	UCEC	0.04817842	0.811089559	0.069092647	protein_coding	protein_coding
-1.650039987	0.192042229	0.720326867	-2.290682277	0.021981796	67	530	PCLO	HMCN1	57	UCEC	0.046799599	0.788045595	0.069092647	protein_coding	protein_coding
-2.427652767	0.088243718	1.009538235	-2.40471602	0.016185037	67	530	PTEN	HTT	57	UCEC	0.012199654	0.638293018	0.069092647	protein_coding	protein_coding
-1.60477363	0.200935036	0.720459281	-2.227431406	0.025918455	67	530	NEB	HUWE1	57	UCEC	0.048954018	0.824751262	0.069092647	protein_coding	protein_coding
-1.64137979	0.193712575	0.720525288	-2.278032178	0.022724661	67	530	NF1	HUWE1	57	UCEC	0.047188297	0.795209063	0.069092647	protein_coding	protein_coding
-2.362341723	0.094199376	1.00944184	-2.340245501	0.019271068	67	530	ATRX	HUWE1	57	UCEC	0.013025481	0.681243334	0.069092647	protein_coding	protein_coding
-2.355305099	0.094864559	1.009351614	-2.333483263	0.019622796	67	530	LRP1B	HUWE1	57	UCEC	0.01311978	0.685932581	0.069092647	protein_coding	protein_coding
-1.214874726	0.296747187	0.593824382	-2.04584851	0.040771278	67	530	DNAH10	HUWE1	57	UCEC	0.092664437	0.950298685	0.069092647	protein_coding	protein_coding
-1.614345834	0.199020821	0.720197145	-2.241533232	0.024991555	67	530	DST	IGF2R	57	UCEC	0.048512575	0.816474637	0.069092647	protein_coding	protein_coding
-1.638511962	0.194268907	0.720346764	-2.274615566	0.022929002	67	530	FAT1	IGF2R	57	UCEC	0.047340381	0.79721386	0.069092647	protein_coding	protein_coding
-1.536583882	0.215114705	0.720166316	-2.13365142	0.032871325	67	530	PTEN	IQSEC2	57	UCEC	0.052438729	0.882445804	0.069092647	protein_coding	protein_coding
-1.566354885	0.208804915	0.720342147	-2.174459583	0.029670638	67	530	PTEN	KIAA2026	57	UCEC	0.050883046	0.856856965	0.069092647	protein_coding	protein_coding
-1.594430812	0.203024054	0.720213566	-2.213830575	0.026840436	67	530	TTN	KMT2A	57	UCEC	0.049486796	0.832924545	0.069092647	protein_coding	protein_coding
-1.216226592	0.296346295	0.593954535	-2.047676246	0.040591733	67	530	SACS	KMT2C	57	UCEC	0.092515648	0.949257002	0.069092647	protein_coding	protein_coding
-1.28162059	0.277587081	0.594035711	-2.157480714	0.030968228	67	530	UBR4	KMT2D	57	UCEC	0.086645467	0.889308934	0.069092647	protein_coding	protein_coding
-1.605863967	0.200716068	0.720301132	-2.229434186	0.02578503	67	530	TTN	LAMA1	57	UCEC	0.048915831	0.823597162	0.069092647	protein_coding	protein_coding
-1.557368195	0.210689837	0.720281408	-2.162166311	0.030605359	67	530	RYR2	LRP2	57	UCEC	0.05134849	0.864489054	0.069092647	protein_coding	protein_coding
-2.36244251	0.094189882	1.009339173	-2.340583396	0.019253638	67	530	LRP1B	MACF1	57	UCEC	0.01302679	0.681037621	0.069092647	protein_coding	protein_coding
-2.280720212	0.102210567	1.00915551	-2.260028498	0.023819482	67	530	CSMD3	MACF1	57	UCEC	0.014141168	0.738764995	0.069092647	protein_coding	protein_coding
-2.351331281	0.095242284	1.009326254	-2.329604794	0.019827049	67	530	NEB	MACF1	57	UCEC	0.013172674	0.688629545	0.069092647	protein_coding	protein_coding
-1.203818461	0.300046306	0.593588314	-2.028035984	0.042556576	67	530	ZFHX3	MDN1	57	UCEC	0.093738006	0.960419256	0.069092647	protein_coding	protein_coding
-2.27750056	0.10254018	1.009048233	-2.257077993	0.024003202	67	530	PIK3CA	MED12	57	UCEC	0.014189754	0.740991575	0.069092647	protein_coding	protein_coding
-1.586309844	0.204679519	0.720244743	-2.202459456	0.02763287	67	530	ZFHX3	MKI67	57	UCEC	0.049887264	0.839767553	0.069092647	protein_coding	protein_coding
-2.425997706	0.088389888	1.009292005	-2.403662859	0.016231735	67	530	MUC17	MUC16	57	UCEC	0.012225761	0.639041823	0.069092647	protein_coding	protein_coding
-1.497020638	0.223795937	0.72012061	-2.078847094	0.037631407	67	530	PIK3CA	MUC4	57	UCEC	0.054559849	0.917975808	0.069092647	protein_coding	protein_coding
-1.592332374	0.203450535	0.720547674	-2.209891768	0.027112675	67	530	OBSCN	MUC5B	57	UCEC	0.049558286	0.835220989	0.069092647	protein_coding	protein_coding
-1.559272916	0.210288913	0.720187327	-2.165093523	0.030380524	67	530	FLG	MUC5B	57	UCEC	0.05126023	0.862684917	0.069092647	protein_coding	protein_coding
-1.492369736	0.224839214	0.720146506	-2.07231407	0.038236161	67	530	ASH1L	MUC5B	57	UCEC	0.05481141	0.922301977	0.069092647	protein_coding	protein_coding
-2.315938052	0.09867358	1.009090092	-2.295075603	0.021728792	67	530	PTEN	MYO10	57	UCEC	0.013653565	0.71310866	0.069092647	protein_coding	protein_coding
-1.599723448	0.201952361	0.720641659	-2.219859798	0.026428286	67	530	TTN	MYO18B	57	UCEC	0.049184286	0.829223303	0.069092647	protein_coding	protein_coding
-1.632479528	0.195444363	0.720201674	-2.266697769	0.023408695	67	530	TTN	NOL4	57	UCEC	0.047640368	0.801809487	0.069092647	protein_coding	protein_coding
-2.274739128	0.102823729	1.009160992	-2.254089432	0.024190542	67	530	DST	PCDH19	57	UCEC	0.014225848	0.743204837	0.069092647	protein_coding	protein_coding
-1.581749999	0.205614957	0.720207832	-2.196241041	0.028074695	67	530	TTN	PCDH9	57	UCEC	0.050118887	0.843544478	0.069092647	protein_coding	protein_coding
-2.282523153	0.102026453	1.009156039	-2.261813898	0.023708904	67	530	CSMD3	PDE4DIP	57	UCEC	0.014115681	0.737435009	0.069092647	protein_coding	protein_coding
-2.31440163	0.0988253	1.009290499	-2.29309761	0.021842386	67	530	LRP1B	PDE4DIP	57	UCEC	0.013669188	0.71448573	0.069092647	protein_coding	protein_coding
-1.592511114	0.203414174	0.720537648	-2.210170582	0.027093326	67	530	FAT4	PDE4DIP	57	UCEC	0.049550402	0.835055305	0.069092647	protein_coding	protein_coding
-1.209502	0.298345819	0.594097333	-2.035865056	0.041763908	67	530	ZFHX3	PRKDC	57	UCEC	0.09311381	0.955929391	0.069092647	protein_coding	protein_coding
-1.239959163	0.289396036	0.593876346	-2.087907982	0.036806136	67	530	PTEN	PRRC2C	57	UCEC	0.09035971	0.926851866	0.069092647	protein_coding	protein_coding
-2.420857576	0.088845393	1.009296565	-2.398559214	0.016459715	67	530	AKAP6	PTEN	57	UCEC	0.012288654	0.642340779	0.069092647	protein_coding	protein_coding
-2.33027338	0.097269152	1.009117484	-2.309219112	0.020931426	67	530	TTN	RANBP2	57	UCEC	0.01345851	0.702996679	0.069092647	protein_coding	protein_coding
-2.28531954	0.101741546	1.009124934	-2.264654715	0.023533876	67	530	PTEN	RGPD3	57	UCEC	0.014077121	0.735330906	0.069092647	protein_coding	protein_coding
-2.269004197	0.10341511	1.009159328	-2.24841027	0.024550041	67	530	TTN	RIMS2	57	UCEC	0.014307714	0.747476873	0.069092647	protein_coding	protein_coding
-1.573999942	0.207214676	0.720446335	-2.18475668	0.028906692	67	530	TTN	RP1L1	57	UCEC	0.050485215	0.850504883	0.069092647	protein_coding	protein_coding
-2.321940953	0.098083026	1.00922154	-2.300724727	0.021407196	67	530	FLG	RYR1	57	UCEC	0.013568353	0.709023411	0.069092647	protein_coding	protein_coding
-2.315948053	0.098672593	1.009198936	-2.294837985	0.021742411	67	530	HUWE1	RYR1	57	UCEC	0.013650516	0.713253674	0.069092647	protein_coding	protein_coding
-2.265270287	0.103801974	1.009058922	-2.244933608	0.024772395	67	530	PTEN	SEC16A	57	UCEC	0.014364064	0.750125465	0.069092647	protein_coding	protein_coding
-2.29079913	0.101185569	1.009121801	-2.270091805	0.023202013	67	530	TTN	SIPA1L2	57	UCEC	0.014000281	0.731308122	0.069092647	protein_coding	protein_coding
-2.213982128	0.109264675	1.008978522	-2.194280729	0.028215234	67	530	MUC16	SSPO	57	UCEC	0.015122372	0.789477279	0.069092647	protein_coding	none protein_coding
-1.490852698	0.225180563	0.720015121	-2.070585262	0.038397571	67	530	OBSCN	SSPO	57	UCEC	0.054908762	0.923464371	0.069092647	protein_coding	none protein_coding
-1.538105629	0.214787604	0.720173453	-2.135743302	0.032700343	67	530	COL6A3	SYNE1	57	UCEC	0.052358259	0.881116293	0.069092647	protein_coding	protein_coding
-2.297195814	0.100540383	1.009194464	-2.276266762	0.022830048	67	530	MKI67	SYNE1	57	UCEC	0.013909031	0.726748601	0.069092647	protein_coding	protein_coding
-2.368654674	0.093606573	1.009329085	-2.346761537	0.01893737	67	530	NRK	SYNE1	57	UCEC	0.012946372	0.676806634	0.069092647	protein_coding	protein_coding
-2.344727501	0.095873324	1.009250106	-2.32323731	0.020166407	67	530	MACF1	SYNE2	57	UCEC	0.013261931	0.6930887	0.069092647	protein_coding	protein_coding
-1.570033858	0.208038139	0.720332126	-2.179597163	0.029287335	67	530	ANK2	SYNE2	57	UCEC	0.050697188	0.853693634	0.069092647	protein_coding	protein_coding
-1.5950661	0.202895117	0.72016594	-2.214859121	0.026769736	67	530	ZFHX3	SZT2	57	UCEC	0.049459984	0.832317868	0.069092647	protein_coding	protein_coding
-2.206598329	0.110074449	1.009099529	-2.186700386	0.028764403	67	530	OBSCN	TAF1	57	UCEC	0.015230833	0.795516848	0.069092647	protein_coding	protein_coding
-2.281836457	0.102096539	1.009076834	-2.261310914	0.023740011	67	530	ZFHX3	TAF1	57	UCEC	0.01412757	0.737827027	0.069092647	protein_coding	protein_coding
-2.362210662	0.094211723	1.009374269	-2.34027232	0.019269684	67	530	CSMD1	TENM1	57	UCEC	0.013028914	0.681242396	0.069092647	protein_coding	protein_coding
-2.343061778	0.096033155	1.009431068	-2.32117066	0.020277635	67	530	NRK	TENM1	57	UCEC	0.013279329	0.694490438	0.069092647	protein_coding	protein_coding
-2.341142406	0.096217656	1.009229383	-2.319732705	0.020355341	67	530	HMCN1	TENM1	57	UCEC	0.013310102	0.695549697	0.069092647	protein_coding	protein_coding
-2.302180101	0.100040507	1.009186282	-2.281224133	0.022535187	67	530	DYNC2H1	TENM1	57	UCEC	0.013840098	0.723123693	0.069092647	protein_coding	protein_coding
-1.576292141	0.206740242	0.720217051	-2.188634855	0.02862339	67	530	DMD	TENM1	57	UCEC	0.050392266	0.848176336	0.069092647	protein_coding	protein_coding
-2.279011731	0.102385341	1.009105995	-2.25844633	0.023917847	67	530	LRP1B	TENM1	57	UCEC	0.014166723	0.739956424	0.069092647	protein_coding	protein_coding
-1.617765186	0.19834146	0.72027453	-2.246039694	0.024701466	67	530	CEP290	TENM1	57	UCEC	0.048339644	0.813811017	0.069092647	protein_coding	protein_coding
-2.326779367	0.097609606	1.009361735	-2.305198708	0.021155447	67	530	ANK2	TENM1	57	UCEC	0.013499153	0.70579506	0.069092647	protein_coding	protein_coding
-1.608779606	0.200131705	0.72040681	-2.233154354	0.025538767	67	530	MUC16	TNRC6B	57	UCEC	0.048763317	0.821369461	0.069092647	protein_coding	protein_coding
-1.183025981	0.306350324	0.594314999	-1.99057063	0.046528112	67	530	USH2A	TRRAP	57	UCEC	0.095571236	0.98199547	0.069092647	protein_coding	protein_coding
-1.624593832	0.196991671	0.721065087	-2.253047418	0.024256159	67	530	MUC16	TRRAP	57	UCEC	0.04793634	0.809526102	0.069092647	protein_coding	protein_coding
-1.624668122	0.196977037	0.720244527	-2.255717415	0.024088334	67	530	PTEN	TTC3	57	UCEC	0.048009931	0.808165149	0.069092647	protein_coding	protein_coding
-1.595177757	0.202872463	0.720113534	-2.215175361	0.02674803	67	530	TTN	UBR3	57	UCEC	0.049459542	0.832139461	0.069092647	protein_coding	protein_coding
-2.402129703	0.090524957	1.00939006	-2.379783394	0.017322817	67	530	ZFHX3	UBR4	57	UCEC	0.012518669	0.654603752	0.069092647	protein_coding	protein_coding
-1.563195117	0.209465733	0.720193021	-2.170522446	0.02996729	67	530	PTEN	UNC13C	57	UCEC	0.051059001	0.859317511	0.069092647	protein_coding	protein_coding
-1.614996347	0.198891397	0.720501473	-2.241489307	0.024994397	67	530	FAT4	USH2A	57	UCEC	0.048452118	0.816430524	0.069092647	protein_coding	protein_coding
-1.611101996	0.19966746	0.720285272	-2.236755434	0.025302329	67	530	KMT2C	USH2A	57	UCEC	0.048661791	0.819268948	0.069092647	protein_coding	protein_coding
-1.576532358	0.206690586	0.720305795	-2.188698701	0.028618746	67	530	ASH1L	USH2A	57	UCEC	0.0503714	0.848120122	0.069092647	protein_coding	protein_coding
-1.563203268	0.209464026	0.720028931	-2.171028414	0.029929025	67	530	MUC16	UTRN	57	UCEC	0.051075008	0.859034183	0.069092647	protein_coding	protein_coding
-1.61536147	0.19881879	0.720182292	-2.24298971	0.024897478	67	530	PTEN	WDR44	57	UCEC	0.04846474	0.815622072	0.069092647	protein_coding	protein_coding
-1.608157502	0.200256246	0.720584451	-2.231740499	0.025632119	67	530	TTN	WNK3	57	UCEC	0.048776676	0.822166806	0.069092647	protein_coding	protein_coding
-2.314950621	0.098771061	1.00911914	-2.29403103	0.021788716	67	530	LRP1B	ZFHX3	57	UCEC	0.013666275	0.713853796	0.069092647	protein_coding	protein_coding
-1.612768506	0.199334989	0.72023887	-2.239213369	0.025142036	67	530	FAT3	ZFHX4	57	UCEC	0.048585182	0.817830381	0.069092647	protein_coding	protein_coding
-2.305965974	0.099662483	1.009225147	-2.28488755	0.022319422	67	530	SACS	ZFHX4	57	UCEC	0.01378675	0.720446093	0.069092647	protein_coding	protein_coding
-2.363384724	0.094101177	1.009446625	-2.341267646	0.019218384	67	530	CSMD1	ZFHX4	57	UCEC	0.013011781	0.680539551	0.069092647	protein_coding	protein_coding
-2.378806962	0.09266106	1.00924318	-2.357020597	0.018422225	67	530	ARID1A	ZNF292	57	UCEC	0.01281776	0.669857464	0.069092647	protein_coding	protein_coding
-1.627963375	0.196329016	0.720527451	-2.25940507	0.023858199	66	530	DST	ABCA13	57	UCEC	0.047825458	0.805953225	0.069092647	protein_coding	protein_coding
-2.311408672	0.099121523	1.009436307	-2.289801403	0.022032832	66	530	PTEN	ALMS1	57	UCEC	0.013706243	0.71683219	0.069092647	protein_coding	protein_coding
-2.2185488	0.108766837	1.009123735	-2.198490356	0.027914181	66	530	PDE4DIP	ANK2	57	UCEC	0.015049187	0.786103922	0.069092647	protein_coding	protein_coding
-1.582405712	0.205480177	0.720487746	-2.196297884	0.028070629	66	530	PCLO	ANK2	57	UCEC	0.050058563	0.843454154	0.069092647	protein_coding	protein_coding
-1.184345917	0.305946228	0.594543603	-1.992025329	0.046368279	66	530	OBSCN	ANK3	57	UCEC	0.095402416	0.98113967	0.069092647	protein_coding	protein_coding
-1.215330449	0.296611983	0.594038696	-2.04587758	0.040768417	66	530	FAT4	ANK3	57	UCEC	0.092583319	0.950264791	0.069092647	protein_coding	protein_coding
-2.355581367	0.094838355	1.009388342	-2.333672056	0.0196129	66	530	NEB	ANK3	57	UCEC	0.013115212	0.685792471	0.069092647	protein_coding	protein_coding
-1.218730878	0.295605088	0.593762006	-2.052557871	0.040115477	66	530	PCLO	ANK3	57	UCEC	0.092319083	0.946525519	0.069092647	protein_coding	protein_coding
-2.356076978	0.094791363	1.009512903	-2.33387505	0.019602266	66	530	GPR112	ARID1A	57	UCEC	0.013105513	0.685620036	0.069092647	protein_coding	protein_coding
-2.301146944	0.100143918	1.009193242	-2.280184655	0.022596739	66	530	DOCK1	ARID1A	57	UCEC	0.013854216	0.723881054	0.069092647	protein_coding	protein_coding
-1.601752573	0.20154299	0.720512904	-2.223072707	0.026210898	66	530	DCHS1	ARID1A	57	UCEC	0.049096974	0.827333599	0.069092647	protein_coding	protein_coding
-1.581389368	0.205689122	0.72020453	-2.195750378	0.028109815	66	530	ATRX	ASH1L	57	UCEC	0.050137289	0.843843279	0.069092647	protein_coding	protein_coding
-1.509878161	0.220936895	0.720135247	-2.09665916	0.036023758	66	530	FAT4	ASH1L	57	UCEC	0.05386129	0.906274464	0.069092647	protein_coding	protein_coding
-2.350909717	0.095282443	1.009550387	-2.328670017	0.019876554	66	530	ZFHX4	ASPM	57	UCEC	0.01317244	0.689222617	0.069092647	protein_coding	protein_coding
-2.378478674	0.092691484	1.009491881	-2.356114714	0.018467214	66	530	DNAH8	ATM	57	UCEC	0.01281572	0.670404118	0.069092647	protein_coding	protein_coding
-2.295340081	0.100727132	1.009668198	-2.273360779	0.023004448	66	530	OBSCN	ATM	57	UCEC	0.013921933	0.728774871	0.069092647	protein_coding	protein_coding
-1.539862975	0.214410479	0.720266266	-2.137907946	0.032524215	66	530	TTN	ATP2B3	57	UCEC	0.052256821	0.879729247	0.069092647	protein_coding	protein_coding
-1.478300981	0.228024778	0.719966949	-2.053290062	0.040044454	66	530	PTEN	BAGE2	57	UCEC	0.055607555	0.935040195	0.069092647	protein_coding	none protein_coding
-2.309673856	0.09929363	1.009243351	-2.28852026	0.022107242	66	530	RYR2	BIRC6	57	UCEC	0.013735235	0.717805321	0.069092647	protein_coding	protein_coding
-2.289913808	0.101275191	1.009192728	-2.269055002	0.023264981	66	530	ZFHX3	BIRC6	57	UCEC	0.014010734	0.732057614	0.069092647	protein_coding	protein_coding
-1.58753424	0.204429064	0.720279348	-2.204053531	0.02752058	66	530	DNAH7	CACNA1E	57	UCEC	0.04982284	0.838796864	0.069092647	protein_coding	protein_coding
-1.523440431	0.217960717	0.720169423	-2.115391715	0.034396575	66	530	OBSCN	CACNA1E	57	UCEC	0.05313218	0.89412619	0.069092647	protein_coding	protein_coding
-2.333927007	0.096914415	1.009251003	-2.31253375	0.020748288	66	530	FAT4	CACNA1E	57	UCEC	0.013405919	0.700616203	0.069092647	protein_coding	protein_coding
-2.335949619	0.096718593	1.009229017	-2.314588244	0.020635477	66	530	SYNE2	CACNA1E	57	UCEC	0.013379408	0.699170431	0.069092647	protein_coding	protein_coding
-2.258139607	0.104544798	1.009052602	-2.237880962	0.025228819	66	530	PTEN	CCDC168	57	UCEC	0.014467034	0.755484127	0.069092647	protein_coding	protein_coding
-1.563579811	0.209385169	0.720426555	-2.170352827	0.029980128	66	530	PIK3CA	CEP290	57	UCEC	0.051016006	0.859380273	0.069092647	protein_coding	protein_coding
-1.605639709	0.200761085	0.720223897	-2.229361893	0.025789836	66	530	MUC16	CHD4	57	UCEC	0.048934209	0.823657186	0.069092647	protein_coding	protein_coding
-1.255301291	0.28498997	0.594367485	-2.111995227	0.034686859	66	530	PTEN	CNTNAP5	57	UCEC	0.088898362	0.913619569	0.069092647	protein_coding	protein_coding
-1.559032482	0.21033948	0.720281251	-2.16447739	0.03042773	66	530	RYR2	CSMD1	57	UCEC	0.051263118	0.863051227	0.069092647	protein_coding	protein_coding
-1.625943776	0.196725922	0.720615211	-2.256327303	0.024050141	66	530	PIK3CA	CSMD2	57	UCEC	0.047913902	0.807721497	0.069092647	protein_coding	protein_coding
-2.24789895	0.105620906	1.009027143	-2.227788386	0.02589463	66	530	FAT4	CTCF	57	UCEC	0.014616677	0.763222445	0.069092647	protein_coding	protein_coding
-1.179975108	0.307286387	0.5939531	-1.98664694	0.046961536	66	530	DST	DCHS1	57	UCEC	0.095931279	0.984297557	0.069092647	protein_coding	protein_coding
-1.540705983	0.214229805	0.720255646	-2.139109899	0.032426769	66	530	TTN	DLG2	57	UCEC	0.052213873	0.878969645	0.069092647	protein_coding	protein_coding
-2.301989002	0.100059627	1.009170322	-2.281070849	0.022544255	66	530	SACS	DMD	57	UCEC	0.013843177	0.723239269	0.069092647	protein_coding	protein_coding
-2.276399197	0.102653176	1.009244456	-2.255547884	0.02409896	66	530	LRP2	DMD	57	UCEC	0.014199929	0.742093477	0.069092647	protein_coding	protein_coding
-1.211223273	0.297832726	0.593852402	-2.039603222	0.041389861	66	530	DNAH5	DNAH10	57	UCEC	0.092998308	0.953827382	0.069092647	protein_coding	protein_coding
-2.335751702	0.096737737	1.009294984	-2.314240869	0.020654513	66	530	PDE4DIP	DNAH10	57	UCEC	0.013380326	0.699399246	0.069092647	protein_coding	protein_coding
-1.698625013	0.182934884	0.72067363	-2.356996208	0.018423435	66	530	DNAH10	DNAH11	57	UCEC	0.044549902	0.751183964	0.069092647	protein_coding	protein_coding
-1.212935177	0.297323301	0.593936448	-2.042196907	0.041132003	66	530	RYR2	DNAH11	57	UCEC	0.092823948	0.952352786	0.069092647	protein_coding	protein_coding
-1.653995761	0.191284054	0.720560775	-2.295428531	0.021708578	66	530	HMCN1	DNAH11	57	UCEC	0.04659347	0.785294366	0.069092647	protein_coding	protein_coding
-1.60524743	0.200839855	0.720422039	-2.228204224	0.0258669	66	530	SYNE2	DNAH11	57	UCEC	0.048934401	0.824300416	0.069092647	protein_coding	protein_coding
-2.408167128	0.089980065	1.009541739	-2.385406205	0.017060272	66	530	ZFHX4	DNAH11	57	UCEC	0.012439618	0.650857002	0.069092647	protein_coding	protein_coding
-1.195546663	0.302538522	0.593737168	-2.013595793	0.044051989	66	530	RYR2	DNAH2	57	UCEC	0.094489032	0.968679172	0.069092647	protein_coding	protein_coding
-2.272339907	0.103070722	1.009233265	-2.251550742	0.024350677	66	530	MUC5B	DNAH7	57	UCEC	0.014258	0.74509563	0.069092647	protein_coding	protein_coding
-2.326102118	0.097675735	1.00919869	-2.304900056	0.021172171	66	530	RYR3	DNAH7	57	UCEC	0.013512615	0.706047555	0.069092647	protein_coding	protein_coding
-1.545680535	0.213166754	0.720189555	-2.146213484	0.03185595	66	530	PCLO	DNAH7	57	UCEC	0.051961508	0.874494734	0.069092647	protein_coding	protein_coding
-1.56073865	0.209980912	0.720179692	-2.167151707	0.030223288	66	530	DMD	DNAH7	57	UCEC	0.051185917	0.861408488	0.069092647	protein_coding	protein_coding
-2.317749095	0.098495039	1.009197402	-2.296626101	0.021640108	66	530	NEB	DNAH7	57	UCEC	0.013625994	0.71196809	0.069092647	protein_coding	protein_coding
-2.318194578	0.098451171	1.009231321	-2.296990323	0.021619322	66	530	CSMD3	DNAH8	57	UCEC	0.01361902	0.711698303	0.069092647	protein_coding	protein_coding
-1.646065881	0.192806944	0.720341616	-2.285118401	0.022305886	66	530	KMT2C	DNAH8	57	UCEC	0.046984597	0.791206476	0.069092647	protein_coding	protein_coding
-2.346585324	0.095695374	1.009410019	-2.324709761	0.020087485	66	530	ZFHX4	DNAH8	57	UCEC	0.013233167	0.692019125	0.069092647	protein_coding	protein_coding
-2.319598933	0.098313008	1.009244853	-2.298351015	0.021541819	66	530	USP9X	DST	57	UCEC	0.013599546	0.710718378	0.069092647	protein_coding	protein_coding
-1.567005326	0.208669144	0.720302965	-2.175480878	0.0295941	66	530	ZFHX3	DYNC2H1	57	UCEC	0.050853866	0.856234052	0.069092647	protein_coding	protein_coding
-2.286140568	0.101658048	1.009259211	-2.26516691	0.023502439	66	530	SYNE2	DYNC2H1	57	UCEC	0.014061867	0.734920819	0.069092647	protein_coding	protein_coding
-2.271533279	0.103153895	1.009164691	-2.250904435	0.024391591	66	530	PCLO	DYNC2H1	57	UCEC	0.014271424	0.745596668	0.069092647	protein_coding	protein_coding
-2.339966419	0.096330873	1.009322679	-2.318353157	0.020430136	66	530	NBEA	FAT1	57	UCEC	0.013323327	0.696495485	0.069092647	protein_coding	protein_coding
-2.279766273	0.102308116	1.009149922	-2.259095724	0.023877431	66	530	RYR1	FAT1	57	UCEC	0.014154819	0.739461968	0.069092647	protein_coding	protein_coding
-1.521886152	0.218299752	0.72026258	-2.112960182	0.034604176	66	530	PDE4DIP	FAT1	57	UCEC	0.053205111	0.895680517	0.069092647	protein_coding	protein_coding
-2.289833073	0.101283367	1.009223075	-2.268906776	0.023273996	66	530	DCHS1	FAT1	57	UCEC	0.014011031	0.732160266	0.069092647	protein_coding	protein_coding
-1.586727383	0.204594075	0.720988681	-2.200766009	0.027752593	66	530	MACF1	FAT2	57	UCEC	0.04979378	0.840641854	0.069092647	protein_coding	protein_coding
-1.61920019	0.198057044	0.720603935	-2.247004369	0.024639748	66	530	RYR2	FAT2	57	UCEC	0.048239171	0.813168871	0.069092647	protein_coding	protein_coding
-1.573997205	0.207215243	0.720179593	-2.185562075	0.02884766	66	530	TTN	FBN1	57	UCEC	0.050511755	0.850062669	0.069092647	protein_coding	protein_coding
-1.595363433	0.202834798	0.720796639	-2.213333618	0.026874654	66	530	SYNE1	FBN2	57	UCEC	0.049384195	0.833099646	0.069092647	protein_coding	protein_coding
-2.285049768	0.101768997	1.009194425	-2.264231461	0.023559883	66	530	ARID1A	FBXW7	57	UCEC	0.014079002	0.735629492	0.069092647	protein_coding	protein_coding
-1.645434278	0.19292876	0.72099198	-2.28218111	0.02247865	66	530	PTEN	FLNB	57	UCEC	0.046954391	0.792716205	0.069092647	protein_coding	protein_coding
-1.542067833	0.213938255	0.720347346	-2.140728137	0.032295968	66	530	PTEN	FOXP1	57	UCEC	0.052133443	0.877931213	0.069092647	protein_coding	protein_coding
-1.677872186	0.186770967	0.720789217	-2.327826424	0.019921322	66	530	TTN	FRAS1	57	UCEC	0.045473795	0.76710981	0.069092647	protein_coding	protein_coding
-1.270415764	0.280714886	0.595944001	-2.131770372	0.033025728	66	530	PTEN	FREM1	57	UCEC	0.087294658	0.902699534	0.069092647	protein_coding	protein_coding
-2.24146412	0.10630275	1.008973439	-2.221529363	0.026315128	66	530	TTN	FSIP2	57	UCEC	0.014712585	0.768068636	0.069092647	protein_coding	protein_coding
-2.242895517	0.106150698	1.008989833	-2.222911911	0.02622174	66	530	PTEN	FSIP2	57	UCEC	0.014691068	0.766994656	0.069092647	protein_coding	protein_coding
-2.319832511	0.098290047	1.009346731	-2.298350448	0.021541851	66	530	PTEN	GPR179	57	UCEC	0.013593655	0.710694287	0.069092647	protein_coding	protein_coding
-2.323492511	0.097930963	1.00950356	-2.301618937	0.021356671	66	530	MACF1	GPR98	57	UCEC	0.013539831	0.708315592	0.069092647	protein_coding	protein_coding
-1.172446841	0.309608451	0.593641185	-1.975009266	0.048267097	66	530	PIK3CA	HECTD4	57	UCEC	0.09671531	0.991129459	0.069092647	protein_coding	protein_coding
-1.562587223	0.209593105	0.720222998	-2.169588068	0.030038066	66	530	TTN	HECW2	57	UCEC	0.051087047	0.859890566	0.069092647	protein_coding	protein_coding
-1.571825558	0.20766573	0.720521824	-2.181509992	0.029145716	66	530	MACF1	HERC2	57	UCEC	0.050587623	0.852482342	0.069092647	protein_coding	protein_coding
-2.313675262	0.09889711	1.009417849	-2.292088717	0.021900524	66	530	HMCN1	HERC2	57	UCEC	0.013675707	0.715183391	0.069092647	protein_coding	protein_coding
-2.343489728	0.095992067	1.00917263	-2.322189147	0.020222753	66	530	PTEN	HIVEP1	57	UCEC	0.013280373	0.693841748	0.069092647	protein_coding	protein_coding
-1.184765042	0.305818025	0.593949716	-1.994722802	0.046073121	66	530	OBSCN	HMCN1	57	UCEC	0.095473507	0.979587614	0.069092647	protein_coding	protein_coding
-1.571651725	0.207701832	0.720348722	-2.181792899	0.029124821	66	530	CSMD3	HMCN1	57	UCEC	0.050613587	0.852341312	0.069092647	protein_coding	protein_coding
-1.171822823	0.309801713	0.593797956	-1.973436944	0.048445802	66	530	DNAH5	HMCN1	57	UCEC	0.096745949	0.992052917	0.069092647	protein_coding	protein_coding
-1.521498799	0.218384327	0.720127597	-2.112818346	0.034616319	66	530	PTEN	HSPG2	57	UCEC	0.053239808	0.895790502	0.069092647	protein_coding	protein_coding
-1.548337007	0.212601234	0.720613883	-2.148636104	0.031663257	66	530	FAT2	HUWE1	57	UCEC	0.051780574	0.87290042	0.069092647	protein_coding	protein_coding
-1.591211415	0.203678723	0.720230723	-2.209307885	0.027153233	66	530	MDN1	HUWE1	57	UCEC	0.0496447	0.835638481	0.069092647	protein_coding	protein_coding
-1.623373566	0.1972322	0.720289579	-2.253779055	0.024210071	66	530	MUC16	IGF2R	57	UCEC	0.048067878	0.809283499	0.069092647	protein_coding	protein_coding
-1.567461024	0.208574075	0.720214072	-2.176382115	0.0295267	66	530	RYR2	KIAA2022	57	UCEC	0.050839554	0.855694855	0.069092647	protein_coding	protein_coding
-1.587499338	0.204436199	0.720319559	-2.20388204	0.027532641	66	530	FAT1	KIAA2022	57	UCEC	0.049820652	0.838892253	0.069092647	protein_coding	protein_coding
-1.597129249	0.202476945	0.720131867	-2.217828875	0.026566503	66	530	TTN	KIF26B	57	UCEC	0.049361342	0.830546975	0.069092647	protein_coding	protein_coding
-1.608862045	0.200115207	0.720130458	-2.234125812	0.025474796	66	530	PTEN	KIF26B	57	UCEC	0.048785715	0.820857013	0.069092647	protein_coding	protein_coding
-1.4966815	0.223871847	0.719924594	-2.078942036	0.037622678	66	530	NPAP1	KMT2D	57	UCEC	0.054599328	0.917934449	0.069092647	protein_coding	protein_coding
-1.222451034	0.294507434	0.594056495	-2.057802657	0.039609081	66	530	ANK3	KMT2D	57	UCEC	0.091923206	0.9435553	0.069092647	protein_coding	protein_coding
-1.209026356	0.298487759	0.593693607	-2.036448333	0.041705356	66	530	ATRX	KMT2D	57	UCEC	0.093231855	0.955627691	0.069092647	protein_coding	protein_coding
-1.50497539	0.222022758	0.720127199	-2.089874389	0.036629085	66	530	FCGBP	KMT2D	57	UCEC	0.054126862	0.910714266	0.069092647	protein_coding	protein_coding
-1.606124362	0.200663809	0.720591801	-2.22889625	0.025820809	66	530	TTN	LAMA3	57	UCEC	0.048875243	0.823851954	0.069092647	protein_coding	protein_coding
-1.602784498	0.201335119	0.720663295	-2.224040699	0.026145706	66	530	RYR2	LRP1B	57	UCEC	0.049031881	0.826723947	0.069092647	protein_coding	protein_coding
-2.235713143	0.106915856	1.009252907	-2.215215955	0.026745245	66	530	MUC16	LRP2	57	UCEC	0.014789337	0.772921765	0.069092647	protein_coding	protein_coding
-1.560960463	0.20993434	0.720187465	-2.167436313	0.030201601	66	530	USP9X	MACF1	57	UCEC	0.051173785	0.861230557	0.069092647	protein_coding	protein_coding
-1.560875894	0.209952095	0.720463234	-2.166489308	0.030273816	66	530	COL6A3	MACF1	57	UCEC	0.051150458	0.861769061	0.069092647	protein_coding	protein_coding
-2.242554332	0.106186921	1.009084307	-2.22236568	0.026258603	66	530	TTN	MAP1B	57	UCEC	0.01469336	0.767398473	0.069092647	protein_coding	protein_coding
-2.243034537	0.106135942	1.009028284	-2.222964977	0.026218162	66	530	DNAH14	MUC16	57	UCEC	0.014687919	0.766945835	0.069092647	protein_coding	protein_coding
-1.586998731	0.204538567	0.720504118	-2.202622708	0.027621352	66	530	RYR3	MUC5B	57	UCEC	0.049827572	0.839615978	0.069092647	protein_coding	protein_coding
-2.272073456	0.103098189	1.009341609	-2.251045073	0.024382683	66	530	PCLO	MUC5B	57	UCEC	0.014258772	0.74545247	0.069092647	protein_coding	protein_coding
-2.247343553	0.105679584	1.009086205	-2.227107597	0.025940084	66	530	TTN	MYO10	57	UCEC	0.014623104	0.763734861	0.069092647	protein_coding	protein_coding
-1.651311955	0.191798113	0.720323356	-2.292459269	0.021879155	66	530	ZFHX3	NBEA	57	UCEC	0.046740431	0.787038449	0.069092647	protein_coding	protein_coding
-1.657363715	0.190640902	0.720365835	-2.300725039	0.021407178	66	530	MUC16	NBEA	57	UCEC	0.046454555	0.782355	0.069092647	protein_coding	protein_coding
-1.645235065	0.192967198	0.720353695	-2.283926738	0.022375837	66	530	PTEN	NCKAP5	57	UCEC	0.047022536	0.791882844	0.069092647	protein_coding	protein_coding
-1.592580292	0.203400102	0.720248632	-2.211153512	0.027025208	66	530	PCLO	NEB	57	UCEC	0.049575049	0.83452467	0.069092647	protein_coding	protein_coding
-2.285628649	0.101710102	1.009197717	-2.26479768	0.023525098	66	530	KMT2C	NEB	57	UCEC	0.014070763	0.735208517	0.069092647	protein_coding	protein_coding
-1.632327133	0.19547415	0.720441923	-2.265730354	0.023467898	66	530	RYR3	NEB	57	UCEC	0.047625197	0.802309397	0.069092647	protein_coding	protein_coding
-1.559771372	0.21018412	0.720241401	-2.165623038	0.030340004	66	530	KMT2D	NHS	57	UCEC	0.051229255	0.862346407	0.069092647	protein_coding	protein_coding
-1.533319745	0.215818016	0.72021249	-2.128982441	0.033255713	66	530	PIK3CA	NRK	57	UCEC	0.052605415	0.885411063	0.069092647	protein_coding	protein_coding
-2.350066267	0.095362843	1.009369006	-2.328252853	0.019898681	66	530	MUC16	NRK	57	UCEC	0.013188243	0.689559	0.069092647	protein_coding	protein_coding
-1.547503372	0.21277854	0.720019796	-2.149251146	0.031614497	66	530	FAT1	NSD1	57	UCEC	0.051884137	0.872611733	0.069092647	protein_coding	protein_coding
-1.571779602	0.207675274	0.720215375	-2.182374406	0.029081912	66	530	PCLO	PCDH15	57	UCEC	0.050620344	0.852009616	0.069092647	protein_coding	protein_coding
-1.559509315	0.210239207	0.72017699	-2.16545285	0.030353022	66	530	KMT2C	PCLO	57	UCEC	0.051249152	0.86246353	0.069092647	protein_coding	protein_coding
-1.605688617	0.200751266	0.720271505	-2.229282438	0.025795118	66	530	POLE	PCLO	57	UCEC	0.04892725	0.823693762	0.069092647	protein_coding	protein_coding
-2.310391945	0.099222354	1.00912515	-2.289499915	0.022050323	66	530	LRP1B	PCLO	57	UCEC	0.013728556	0.717123899	0.069092647	protein_coding	protein_coding
-2.289421183	0.101325094	1.009700875	-2.267425175	0.023364265	66	530	OBSCN	PDE4DIP	57	UCEC	0.014003683	0.733148161	0.069092647	protein_coding	protein_coding
-2.164535518	0.114803246	1.009027846	-2.145169261	0.031939316	66	530	DNAH14	PIK3CA	57	UCEC	0.015887382	0.829575677	0.069092647	protein_coding	protein_coding
-1.583897135	0.205173948	0.720258685	-2.19906704	0.027873156	66	530	DST	POLE	57	UCEC	0.050006406	0.841819118	0.069092647	protein_coding	protein_coding
-2.33262671	0.097040515	1.009245331	-2.311258361	0.020818588	66	530	GPR158	PTEN	57	UCEC	0.013423511	0.701520006	0.069092647	protein_coding	protein_coding
-1.602347712	0.201423079	0.720283557	-2.224606819	0.026107645	66	530	SPTBN1	PTEN	57	UCEC	0.049089826	0.826469768	0.069092647	protein_coding	protein_coding
-1.471480272	0.229585385	0.720035325	-2.043622336	0.040990871	66	530	CELSR1	PTEN	57	UCEC	0.055980632	0.941565809	0.069092647	protein_coding	protein_coding
-1.612121639	0.199463974	0.72036335	-2.237928454	0.025225721	66	530	TTN	PTPRB	57	UCEC	0.04860476	0.81855927	0.069092647	protein_coding	protein_coding
-1.57642636	0.206712496	0.720149741	-2.189025796	0.028594965	66	530	PTEN	RELN	57	UCEC	0.050392151	0.847950627	0.069092647	protein_coding	protein_coding
-2.316819667	0.098586626	1.009195319	-2.295709882	0.021692475	66	530	ZFHX4	RYR1	57	UCEC	0.01363872	0.71262721	0.069092647	protein_coding	protein_coding
-1.606982841	0.200491617	0.720340343	-2.230866084	0.025690001	66	530	RYR2	RYR1	57	UCEC	0.048857376	0.822739406	0.069092647	protein_coding	protein_coding
-1.525810783	0.217444685	0.72016061	-2.118709022	0.034115065	66	530	ASH1L	RYR1	57	UCEC	0.053007303	0.891993899	0.069092647	protein_coding	protein_coding
-2.307894952	0.099470421	1.009164353	-2.286936656	0.022199521	66	530	NEB	RYR1	57	UCEC	0.013761821	0.718972033	0.069092647	protein_coding	protein_coding
-1.199534513	0.301334447	0.593639791	-2.020643715	0.04331666	66	530	RYR2	SACS	57	UCEC	0.094130939	0.96463979	0.069092647	protein_coding	protein_coding
-1.633511601	0.195242754	0.720264772	-2.267932105	0.023333345	66	530	TTN	SCN1A	57	UCEC	0.04758534	0.801081453	0.069092647	protein_coding	protein_coding
-2.288766283	0.101391473	1.009152205	-2.268008999	0.023328658	66	530	PTEN	SIPA1L2	57	UCEC	0.014027935	0.732839943	0.069092647	protein_coding	protein_coding
-1.563953667	0.209306903	0.720232759	-2.171455889	0.029896728	66	530	TTN	SORCS1	57	UCEC	0.051016311	0.858732806	0.069092647	protein_coding	protein_coding
-1.589252179	0.204078169	0.720124729	-2.206912379	0.027320181	66	530	TTN	SPEN	57	UCEC	0.049752396	0.837103375	0.069092647	protein_coding	protein_coding
-1.190064697	0.304201582	0.59373515	-2.00436962	0.045030481	66	530	MDN1	SYNE1	57	UCEC	0.095008816	0.974000168	0.069092647	protein_coding	protein_coding
-1.173604425	0.309250261	0.59407746	-1.975507412	0.048210594	66	530	SACS	SYNE1	57	UCEC	0.096520849	0.990829702	0.069092647	protein_coding	protein_coding
-1.587482796	0.204439581	0.720309776	-2.203889005	0.027532151	66	530	KMT2C	SYNE2	57	UCEC	0.049822432	0.838890046	0.069092647	protein_coding	protein_coding
-2.330038047	0.097292045	1.009275811	-2.308623691	0.020964472	66	530	HUWE1	SYNE2	57	UCEC	0.013457501	0.703380376	0.069092647	protein_coding	protein_coding
-2.371880988	0.093305055	1.009392481	-2.349810438	0.018782974	66	530	ANK3	SYNE2	57	UCEC	0.012903067	0.674710395	0.069092647	protein_coding	protein_coding
-1.573709542	0.20727486	0.720421235	-2.184429701	0.028930688	66	530	DST	SZT2	57	UCEC	0.050502363	0.850710053	0.069092647	protein_coding	protein_coding
-2.337801805	0.096539618	1.009301363	-2.316257455	0.020544216	66	530	DST	TAF1	57	UCEC	0.013352756	0.697975599	0.069092647	protein_coding	protein_coding
-2.32480714	0.097802304	1.00920234	-2.30360855	0.021244627	66	530	KMT2C	TENM1	57	UCEC	0.013530029	0.706967521	0.069092647	protein_coding	protein_coding
-2.384374299	0.092146618	1.009414624	-2.362135681	0.018169991	66	530	ATRX	TENM1	57	UCEC	0.012742315	0.666362384	0.069092647	protein_coding	protein_coding
-1.67305103	0.187673593	0.720639171	-2.321620995	0.020253352	66	530	ABCA13	TENM1	57	UCEC	0.045707001	0.770590439	0.069092647	protein_coding	protein_coding
-2.364271009	0.094017814	1.009276924	-2.342539448	0.019153009	66	530	DNAH5	TENM1	57	UCEC	0.013004579	0.679710547	0.069092647	protein_coding	protein_coding
-2.314678805	0.098797912	1.009252063	-2.293459573	0.02182156	66	530	MKI67	TENM1	57	UCEC	0.01366643	0.714233912	0.069092647	protein_coding	protein_coding
-2.267536684	0.103566984	1.009165678	-2.246941937	0.024643738	66	530	AHNAK	TENM1	57	UCEC	0.014328547	0.748583927	0.069092647	protein_coding	protein_coding
-1.557861648	0.210585897	0.720252622	-2.162937836	0.030545961	66	530	ZFHX3	TENM3	57	UCEC	0.051326054	0.864013825	0.069092647	protein_coding	protein_coding
-1.545527952	0.213199283	0.720326416	-2.145593882	0.031905394	66	530	SYNE2	TNRC6B	57	UCEC	0.051955498	0.874862825	0.069092647	protein_coding	protein_coding
-1.184535095	0.305888356	0.594463553	-1.992611806	0.046303971	66	530	PTEN	TP63	57	UCEC	0.095399336	0.98080018	0.069092647	protein_coding	protein_coding
-1.537944199	0.21482228	0.720552505	-2.134395742	0.0328104	66	530	ASH1L	TRRAP	57	UCEC	0.052327821	0.88191351	0.069092647	protein_coding	protein_coding
-1.669377279	0.188364327	0.720539571	-2.316843302	0.020512269	66	530	DST	UBR4	57	UCEC	0.045884182	0.773275632	0.069092647	protein_coding	protein_coding
-2.381109573	0.092447943	1.009202131	-2.359398084	0.018304608	66	530	SYNE1	UBR4	57	UCEC	0.012789308	0.668263049	0.069092647	protein_coding	protein_coding
-1.625521259	0.19680906	0.720368058	-2.256514903	0.024038403	66	530	PIK3CA	UBR4	57	UCEC	0.047957376	0.807671498	0.069092647	protein_coding	protein_coding
-1.567527914	0.208560124	0.720267699	-2.176312939	0.029531869	66	530	TTN	UNC13C	57	UCEC	0.05083081	0.855727561	0.069092647	protein_coding	protein_coding
-1.568434228	0.208371189	0.720517825	-2.176815302	0.029494351	66	530	DST	USP34	57	UCEC	0.050759872	0.855371595	0.069092647	protein_coding	protein_coding
-2.283022646	0.101975505	1.009276445	-2.262038966	0.023694996	66	530	PTEN	UTP20	57	UCEC	0.014105303	0.737240723	0.069092647	protein_coding	protein_coding
-1.575406244	0.206923474	0.720237872	-2.187341579	0.028717598	66	530	DST	UTRN	57	UCEC	0.05043487	0.848962711	0.069092647	protein_coding	protein_coding
-1.253907027	0.285387599	0.593836026	-2.111537481	0.03472614	66	530	PTEN	VCAN	57	UCEC	0.089115176	0.913941773	0.069092647	protein_coding	protein_coding
-1.59411488	0.203088206	0.720183716	-2.213483649	0.026864319	66	530	PTEN	VPS13C	57	UCEC	0.049505329	0.83313899	0.069092647	protein_coding	protein_coding
-1.603610682	0.201168848	0.720645342	-2.225242553	0.02606496	66	530	PTEN	WNK3	57	UCEC	0.048993112	0.826012138	0.069092647	protein_coding	protein_coding
-2.29369872	0.100892597	1.009326027	-2.272505275	0.02305601	66	530	PTEN	ZEB2	57	UCEC	0.013954158	0.729482641	0.069092647	protein_coding	protein_coding
-1.180308849	0.307183851	0.593605294	-1.988373185	0.046770432	66	530	NF1	ZFHX3	57	UCEC	0.095964665	0.983298569	0.069092647	protein_coding	protein_coding
-1.537171299	0.21498838	0.720256966	-2.134198447	0.03282654	66	530	VPS13A	ZFHX3	57	UCEC	0.052398624	0.882084304	0.069092647	protein_coding	protein_coding
-1.56007333	0.210120663	0.720262517	-2.165978781	0.030312808	66	530	USP9X	ZFHX3	57	UCEC	0.051211669	0.862121734	0.069092647	protein_coding	protein_coding
-1.253942398	0.285377504	0.594019211	-2.110945868	0.034776965	66	530	SACS	ZFHX3	57	UCEC	0.089080034	0.914237636	0.069092647	protein_coding	protein_coding
-1.567435827	0.208579331	0.720188322	-2.176424943	0.0295235	66	530	COL6A3	ZFHX3	57	UCEC	0.050843401	0.85567323	0.069092647	protein_coding	protein_coding
-2.270744014	0.103235343	1.00922167	-2.2499953	0.024449244	66	530	APOB	ZFHX3	57	UCEC	0.014281097	0.746268711	0.069092647	protein_coding	protein_coding
-2.317372707	0.098532119	1.009371899	-2.295856174	0.021684106	66	530	COL6A3	ZFHX4	57	UCEC	0.013626462	0.712479753	0.069092647	protein_coding	protein_coding
-1.553933511	0.211414734	0.720241471	-2.157517405	0.030965372	66	530	RYR3	ZFHX4	57	UCEC	0.051529192	0.867395508	0.069092647	protein_coding	protein_coding
-2.317649198	0.098504879	1.009379944	-2.296111798	0.02166949	66	530	PTEN	ZMYM3	57	UCEC	0.01362248	0.712294017	0.069092647	protein_coding	protein_coding
-2.41852976	0.08905245	1.010341292	-2.393775034	0.016675974	66	530	PIK3CA	ZNF292	57	UCEC	0.012292098	0.645157486	0.069092647	protein_coding	protein_coding
-2.363434127	0.094096528	1.009392486	-2.341442165	0.019209402	66	530	RYR3	ZNF292	57	UCEC	0.013012519	0.680433724	0.069092647	protein_coding	protein_coding
-2.236373044	0.106845326	1.009077258	-2.216255521	0.026674007	66	530	TTN	ZXDB	57	UCEC	0.01478467	0.772146007	0.069092647	protein_coding	protein_coding
-1.578067297	0.206373572	0.720174275	-2.191229751	0.028435171	65	530	MUC16	ABCA12	57	UCEC	0.050307109	0.846601043	0.069092647	protein_coding	protein_coding
-2.321343921	0.098141602	1.009172623	-2.300244645	0.021434364	65	530	HUWE1	ABCA13	57	UCEC	0.013577758	0.709378829	0.069092647	protein_coding	protein_coding
-1.181683606	0.306761838	0.594023097	-1.989288989	0.046669314	65	530	ANK2	ABCA13	57	UCEC	0.095754383	0.982752141	0.069092647	protein_coding	protein_coding
-1.578510129	0.206282203	0.720301275	-2.19145819	0.028418652	65	530	SYNE1	ABCA13	57	UCEC	0.050272321	0.846436894	0.069092647	protein_coding	protein_coding
-2.22022087	0.108585123	1.009253918	-2.199863514	0.02781658	65	530	PDE4DIP	AHNAK	57	UCEC	0.015020212	0.784990871	0.069092647	protein_coding	protein_coding
-2.302757579	0.099982753	1.009437404	-2.281228701	0.022534917	65	530	TTN	ALMS1	57	UCEC	0.013825302	0.723062029	0.069092647	protein_coding	protein_coding
-2.182655283	0.112741772	1.009077727	-2.163019979	0.030539643	65	530	PTEN	ALS2CR11	57	UCEC	0.015600573	0.814758981	0.069092647	protein_coding	protein_coding
-2.434482039	0.087643131	1.009630746	-2.411259809	0.015897519	65	530	DST	APC	57	UCEC	0.012114426	0.63406375	0.069092647	protein_coding	protein_coding
-1.591214939	0.203678005	0.720701052	-2.207870981	0.027253268	65	530	RYR2	ARHGAP35	57	UCEC	0.049598782	0.836406219	0.069092647	protein_coding	protein_coding
-1.604983376	0.200892894	0.721026712	-2.22596937	0.026016233	65	530	CEP350	ARID1A	57	UCEC	0.048889348	0.825495868	0.069092647	protein_coding	protein_coding
-2.263066987	0.104030933	1.009078821	-2.242705861	0.024915788	65	530	GRIA3	ARID1A	57	UCEC	0.014395185	0.75180936	0.069092647	protein_coding	protein_coding
-1.509780145	0.220958552	0.720365536	-2.095852825	0.036095249	65	530	DNAH9	ARID1A	57	UCEC	0.053842261	0.906772494	0.069092647	protein_coding	protein_coding
-2.32003365	0.098270279	1.009306469	-2.298641416	0.02152531	65	530	CEP290	ARID1A	57	UCEC	0.013591994	0.710495282	0.069092647	protein_coding	protein_coding
-1.679619075	0.186444984	0.721300591	-2.328597947	0.019880375	65	530	PRKDC	ARID1A	57	UCEC	0.045348951	0.766538835	0.069092647	protein_coding	protein_coding
-1.550076605	0.212231715	0.720274629	-2.152063315	0.031392368	65	530	PLXNA4	ARID1A	57	UCEC	0.051724957	0.87080402	0.069092647	protein_coding	protein_coding
-1.617355621	0.198422711	0.720488214	-2.244805105	0.024780647	65	530	HYDIN	ARID1A	57	UCEC	0.048339197	0.814485445	0.069092647	protein_coding	protein_coding
-1.508217877	0.221304018	0.720267467	-2.093969181	0.036262726	65	530	OBSCN	ASPM	57	UCEC	0.05393681	0.90801567	0.069092647	protein_coding	protein_coding
-2.305583131	0.099700645	1.009589049	-2.283684765	0.022390064	65	530	RYR2	ATM	57	UCEC	0.013782196	0.7212362	0.069092647	protein_coding	protein_coding
-2.324418981	0.097840275	1.009432854	-2.302697967	0.021295843	65	530	NEB	ATM	57	UCEC	0.013529167	0.707561599	0.069092647	protein_coding	protein_coding
-1.626299674	0.19665592	0.720315264	-2.257760949	0.023960567	65	530	KMT2C	ATRX	57	UCEC	0.047925019	0.806959533	0.069092647	protein_coding	protein_coding
-2.330925979	0.097205695	1.009472597	-2.30905325	0.020940627	65	530	FAT4	ATRX	57	UCEC	0.013440372	0.703027205	0.069092647	protein_coding	protein_coding
-2.351132424	0.095261225	1.009361865	-2.329325592	0.019841824	65	530	LRP1B	ATRX	57	UCEC	0.013174374	0.688814573	0.069092647	protein_coding	protein_coding
-1.436555418	0.237745283	0.720119165	-1.994885691	0.046055349	65	530	TTN	BSN	57	UCEC	0.057960764	0.975191073	0.069092647	protein_coding	protein_coding
-1.611479821	0.199592035	0.720292173	-2.237258548	0.025269447	65	530	ZFHX3	CACNA1C	57	UCEC	0.048642751	0.818970543	0.069092647	protein_coding	protein_coding
-2.36948172	0.093529188	1.009555837	-2.347053657	0.01892253	65	530	DST	CACNA1D	57	UCEC	0.012929921	0.67654773	0.069092647	protein_coding	protein_coding
-1.663192521	0.189532925	0.720534484	-2.308276088	0.020983786	65	530	ABCA13	CACNA1E	57	UCEC	0.046169304	0.778065217	0.069092647	protein_coding	protein_coding
-1.612942595	0.19930029	0.720290262	-2.239295295	0.025136709	65	530	DMD	CACNA1E	57	UCEC	0.048571832	0.817770388	0.069092647	protein_coding	protein_coding
-2.15427569	0.115987171	1.008976154	-2.135110609	0.032751976	65	530	TTN	CELSR2	57	UCEC	0.016052849	0.838045882	0.069092647	protein_coding	protein_coding
-1.502770141	0.222512913	0.720187384	-2.086637693	0.036920897	65	530	MUC16	CEP290	57	UCEC	0.054239958	0.912832507	0.069092647	protein_coding	protein_coding
-2.269371273	0.103377156	1.009219333	-2.248640309	0.02453539	65	530	CSMD3	CEP290	57	UCEC	0.01430078	0.747290426	0.069092647	protein_coding	protein_coding
-1.536730639	0.215083138	0.720255075	-2.133592239	0.032876174	65	530	PTEN	CHD5	57	UCEC	0.052421913	0.882469818	0.069092647	protein_coding	protein_coding
-1.552900088	0.211633328	0.720261751	-2.156021873	0.031081957	65	530	DST	CHD7	57	UCEC	0.051580421	0.86832687	0.069092647	protein_coding	protein_coding
-1.446804213	0.235321124	0.72000677	-2.009431402	0.044491403	65	530	PTEN	CHD8	57	UCEC	0.057382409	0.965034966	0.069092647	protein_coding	protein_coding
-1.187770963	0.304900141	0.593810099	-2.000253895	0.045472855	65	530	ZFHX3	CLCN5	57	UCEC	0.095213003	0.976380249	0.069092647	protein_coding	protein_coding
-1.559179844	0.210308486	0.72037192	-2.164409524	0.030432934	65	530	FAT3	CSMD3	57	UCEC	0.051246456	0.863077421	0.069092647	protein_coding	protein_coding
-1.554685384	0.211255837	0.72029373	-2.158404716	0.030896379	65	530	RYR3	CSMD3	57	UCEC	0.05148519	0.866832364	0.069092647	protein_coding	protein_coding
-2.313999741	0.098865025	1.009240099	-2.292813912	0.021858721	65	530	POLE	CSMD3	57	UCEC	0.013676034	0.714702329	0.069092647	protein_coding	protein_coding
-2.227558815	0.107791248	1.00907997	-2.207514647	0.027278125	65	530	ZFHX4	CTCF	57	UCEC	0.014915482	0.778986103	0.069092647	protein_coding	protein_coding
-1.215046095	0.296696338	0.593759467	-2.046360797	0.040720886	65	530	ZFHX3	DCHS1	57	UCEC	0.092660347	0.950014966	0.069092647	protein_coding	protein_coding
-1.524858451	0.217651863	0.720174391	-2.117346117	0.034230484	65	530	TTN	DGKK	57	UCEC	0.053056375	0.892867894	0.069092647	protein_coding	protein_coding
-1.573495651	0.207319199	0.720277646	-2.184568214	0.028920521	65	530	PTEN	DICER1	57	UCEC	0.050527384	0.850652595	0.069092647	protein_coding	protein_coding
-1.590825127	0.203757417	0.720251918	-2.208706546	0.027195059	65	530	DNAH5	DMD	57	UCEC	0.049661818	0.83599607	0.069092647	protein_coding	protein_coding
-1.561803865	0.209757356	0.720564511	-2.167472641	0.030198834	65	530	CEP290	DMD	57	UCEC	0.051092871	0.861140658	0.069092647	protein_coding	protein_coding
-1.600256794	0.201844679	0.720397181	-2.221353493	0.026327028	65	530	MKI67	DNAH10	57	UCEC	0.049181622	0.82838412	0.069092647	protein_coding	protein_coding
-1.616534689	0.198585669	0.720259736	-2.24437742	0.024808128	65	530	NEB	DNAH10	57	UCEC	0.048400566	0.814789399	0.069092647	protein_coding	protein_coding
-1.661892385	0.189779504	0.720727609	-2.305853646	0.021118811	65	530	PCLO	DNAH11	57	UCEC	0.046211874	0.779372421	0.069092647	protein_coding	protein_coding
-2.368547376	0.093616617	1.009353591	-2.346598256	0.01894567	65	530	HUWE1	DNAH11	57	UCEC	0.012947139	0.676911771	0.069092647	protein_coding	protein_coding
-1.604378723	0.201014402	0.720504257	-2.226744267	0.02596437	65	530	COL6A3	DNAH11	57	UCEC	0.048969038	0.825149762	0.069092647	protein_coding	protein_coding
-2.330848679	0.097213209	1.009438466	-2.309054745	0.020940544	65	530	PDE4DIP	DNAH11	57	UCEC	0.01344231	0.703034519	0.069092647	protein_coding	protein_coding
-1.219076448	0.295502953	0.593947814	-2.052497576	0.04012133	65	530	ZFHX3	DNAH2	57	UCEC	0.092253582	0.946543138	0.069092647	protein_coding	protein_coding
-1.649026097	0.192237038	0.720619633	-2.288344669	0.022117457	65	530	PCLO	DNAH3	57	UCEC	0.046820198	0.78929778	0.069092647	protein_coding	protein_coding
-1.64552108	0.192912014	0.720586522	-2.283585703	0.022395891	65	530	MACF1	DNAH3	57	UCEC	0.046987641	0.792017734	0.069092647	protein_coding	protein_coding
-1.563236565	0.209457052	0.720405142	-2.169940876	0.030011325	65	530	USH2A	DNAH7	57	UCEC	0.051035662	0.859639222	0.069092647	protein_coding	protein_coding
-1.536163769	0.215205096	0.720195072	-2.132982896	0.032926129	65	530	RYR2	DNAH7	57	UCEC	0.052457807	0.882866368	0.069092647	protein_coding	protein_coding
-1.561385361	0.209845158	0.720220617	-2.167926501	0.030164279	65	530	MACF1	DNAH7	57	UCEC	0.051148722	0.860920638	0.069092647	protein_coding	protein_coding
-2.223528805	0.108226524	1.009118843	-2.203436018	0.027564032	65	530	TAF1	DNAH7	57	UCEC	0.014974572	0.782191352	0.069092647	protein_coding	protein_coding
-1.625892913	0.196735929	0.720352651	-2.257079098	0.024003133	65	530	FLG	DNAH8	57	UCEC	0.047941004	0.807347	0.069092647	protein_coding	protein_coding
-1.632520134	0.195436427	0.720682714	-2.265241141	0.023497886	65	530	MACF1	DNAH8	57	UCEC	0.047593539	0.802533232	0.069092647	protein_coding	protein_coding
-2.30068728	0.100189961	1.009403399	-2.279254542	0.022651939	65	530	FAT1	DOCK11	57	UCEC	0.013854878	0.724512243	0.069092647	protein_coding	protein_coding
-1.592615466	0.203392948	0.720777392	-2.209580217	0.02713431	65	530	DST	DOCK11	57	UCEC	0.049521956	0.835360611	0.069092647	protein_coding	protein_coding
-1.491821644	0.22496248	0.720247037	-2.07126384	0.038334147	65	530	ASH1L	DYNC2H1	57	UCEC	0.054830655	0.922989472	0.069092647	protein_coding	protein_coding
-2.253560904	0.105024576	1.009477858	-2.23240251	0.025588372	65	530	HUWE1	DYNC2H1	57	UCEC	0.014521318	0.759584047	0.069092647	protein_coding	protein_coding
-1.631022908	0.195729259	0.720354808	-2.264193824	0.023562196	65	530	DNAH8	DYNC2H1	57	UCEC	0.047695495	0.803219314	0.069092647	protein_coding	protein_coding
-2.270751802	0.103234539	1.009418699	-2.249563837	0.024476646	65	530	OBSCN	DYNC2H1	57	UCEC	0.014275472	0.746551145	0.069092647	protein_coding	protein_coding
-2.312108376	0.099052192	1.009486895	-2.290379784	0.02199931	65	530	RYR2	DYNC2H1	57	UCEC	0.013695298	0.716401824	0.069092647	protein_coding	protein_coding
-2.194244819	0.111442689	1.00912625	-2.174400695	0.029675056	65	530	ANK2	DYNC2H1	57	UCEC	0.015419347	0.805447408	0.069092647	protein_coding	protein_coding
-1.516757053	0.219422309	0.720301269	-2.105725922	0.035228167	65	530	TTN	EP300	57	UCEC	0.053474652	0.900354624	0.069092647	protein_coding	protein_coding
-1.569171444	0.208217631	0.720430401	-2.178102759	0.029398387	65	530	MKI67	FAT1	57	UCEC	0.050731157	0.854594785	0.069092647	protein_coding	protein_coding
-2.307554179	0.099504324	1.009332531	-2.286217978	0.02224151	65	530	TRRAP	FAT1	57	UCEC	0.013761975	0.719454194	0.069092647	protein_coding	protein_coding
-2.182057412	0.112809197	1.00927004	-2.162015442	0.030616986	65	530	KMT2B	FAT1	57	UCEC	0.01560402	0.815553599	0.069092647	protein_coding	protein_coding
-1.582905363	0.205377534	0.72037648	-2.197330712	0.027996836	65	530	FAT2	FAT1	57	UCEC	0.05004447	0.842848997	0.069092647	protein_coding	protein_coding
-2.295893812	0.100671372	1.00930004	-2.274738651	0.022921612	65	530	PCDH15	FAT1	57	UCEC	0.01392427	0.727846042	0.069092647	protein_coding	protein_coding
-1.595209587	0.202866006	0.720355717	-2.214474807	0.026796134	65	530	ATRX	FAT1	57	UCEC	0.049434496	0.832508054	0.069092647	protein_coding	protein_coding
-1.569682048	0.208111341	0.720253895	-2.179345451	0.029306015	65	530	FAT3	FAT1	57	UCEC	0.050722804	0.853863089	0.069092647	protein_coding	protein_coding
-2.334563174	0.096852781	1.009314695	-2.313018116	0.020721643	65	530	CSMD1	FAT1	57	UCEC	0.013395721	0.700258048	0.069092647	protein_coding	protein_coding
-1.534290391	0.215608635	0.720178269	-2.130431389	0.033136015	65	530	LRP1B	FAT1	57	UCEC	0.052557903	0.884492732	0.069092647	protein_coding	protein_coding
-2.218036682	0.108822552	1.009110748	-2.198011157	0.027948311	65	530	ZFHX3	FCGBP	57	UCEC	0.015057279	0.786486582	0.069092647	protein_coding	protein_coding
-1.587262531	0.204484617	0.720292104	-2.203637278	0.027549863	65	530	DNAH5	FLG	57	UCEC	0.049835133	0.839045781	0.069092647	protein_coding	protein_coding
-1.499626548	0.223213504	0.719918721	-2.083049802	0.037246684	65	530	PTEN	FLRT2	57	UCEC	0.054439394	0.91522453	0.069092647	protein_coding	protein_coding
-2.270015594	0.103310569	1.00910162	-2.249541125	0.024478089	65	530	TTN	FMR1	57	UCEC	0.014294867	0.746636804	0.069092647	protein_coding	protein_coding
-2.266624664	0.103661483	1.009165621	-2.246038327	0.024701553	65	530	MUC16	GPR112	57	UCEC	0.014341623	0.749266878	0.069092647	protein_coding	protein_coding
-2.34804015	0.095556255	1.009384229	-2.326210459	0.020007326	65	530	DNAH2	GPR98	57	UCEC	0.013214597	0.69097816	0.069092647	protein_coding	protein_coding
-1.499595339	0.22322047	0.720555666	-2.081165147	0.037418792	65	530	PTEN	GREB1	57	UCEC	0.05437317	0.916396422	0.069092647	protein_coding	protein_coding
-2.280520594	0.102230972	1.00920927	-2.259710313	0.023839236	65	530	PTEN	GRM7	57	UCEC	0.014142501	0.738990343	0.069092647	protein_coding	protein_coding
-2.223609407	0.108217801	1.009472219	-2.202744527	0.02761276	65	530	PDE4DIP	HERC2	57	UCEC	0.014962998	0.782670212	0.069092647	protein_coding	protein_coding
-1.617632815	0.198367717	0.720516783	-2.245100812	0.024761661	65	530	NEB	HMCN1	57	UCEC	0.048323093	0.814305301	0.069092647	protein_coding	protein_coding
-2.331419505	0.097157733	1.009409906	-2.309685581	0.020905568	65	530	ATRX	HMCN1	57	UCEC	0.013435391	0.702593993	0.069092647	protein_coding	protein_coding
-1.560248253	0.210083911	0.720275325	-2.166183123	0.030297196	65	530	CSMD1	HUWE1	57	UCEC	0.051201426	0.86199258	0.069092647	protein_coding	protein_coding
-1.576063957	0.206787423	0.720682465	-2.18690482	0.028749473	65	530	PDE4DIP	HUWE1	57	UCEC	0.050357808	0.849144145	0.069092647	protein_coding	protein_coding
-1.556973511	0.210773009	0.720186558	-2.161903044	0.03062565	65	530	MUC16	KIAA1109	57	UCEC	0.051378311	0.864669558	0.069092647	protein_coding	protein_coding
-1.213921603	0.297030158	0.593960273	-2.043775751	0.040975706	65	530	TTN	KIAA2018	57	UCEC	0.092728099	0.951458253	0.069092647	protein_coding	protein_coding
-1.533872563	0.215698741	0.720279976	-2.129550473	0.033208744	65	530	USH2A	KIAA2022	57	UCEC	0.052569387	0.885038784	0.069092647	protein_coding	protein_coding
-2.31026266	0.099235183	1.009182357	-2.289242023	0.022065294	65	530	CACNA1E	KIAA2022	57	UCEC	0.013728792	0.717297041	0.069092647	protein_coding	protein_coding
-1.552442701	0.211730148	0.720345417	-2.155136501	0.031151154	65	530	TTN	KIAA2026	57	UCEC	0.051595557	0.868866593	0.069092647	protein_coding	protein_coding
-1.426019486	0.240263393	0.720071123	-1.980386994	0.04766006	65	530	SSPO	KMT2B	57	UCEC	0.058580179	0.985427142	0.069092647	none protein_coding	protein_coding
-1.428525678	0.239662001	0.720132453	-1.983698517	0.047289459	65	530	PIK3R1	KMT2B	57	UCEC	0.058426526	0.98307873	0.069092647	protein_coding	protein_coding
-1.58295837	0.205366648	0.72018727	-2.197981601	0.027950417	65	530	LRP1B	KMT2C	57	UCEC	0.050060379	0.842491825	0.069092647	protein_coding	protein_coding
-1.623273744	0.197251889	0.720517332	-2.252928099	0.024263683	65	530	GPR98	KMT2D	57	UCEC	0.048051222	0.809725666	0.069092647	protein_coding	protein_coding
-1.580585394	0.205854557	0.720245435	-2.194509423	0.028198807	65	530	PCDH15	KMT2D	57	UCEC	0.050173592	0.844589692	0.069092647	protein_coding	protein_coding
-1.587971452	0.204339704	0.720384909	-2.204337476	0.027500619	65	530	HMCN1	KMT2D	57	UCEC	0.049790759	0.838603701	0.069092647	protein_coding	protein_coding
-1.177939925	0.307912408	0.593735354	-1.983947758	0.047261664	65	530	MKI67	KMT2D	57	UCEC	0.09616775	0.985881977	0.069092647	protein_coding	protein_coding
-1.564928886	0.209102883	0.720256006	-2.172739796	0.029799907	65	530	AHNAK	KMT2D	57	UCEC	0.050964261	0.857934849	0.069092647	protein_coding	protein_coding
-1.578228392	0.206340329	0.720261048	-2.191189426	0.028438087	65	530	NBEA	KMT2D	57	UCEC	0.050290452	0.846608646	0.069092647	protein_coding	protein_coding
-1.611650414	0.199557989	0.720825925	-2.235838583	0.025362347	65	530	KMT2D	KRAS	57	UCEC	0.048583601	0.819687916	0.069092647	protein_coding	protein_coding
-2.30376128	0.09988245	1.00931155	-2.282507596	0.02245939	65	530	ZFHX3	KRAS	57	UCEC	0.01381484	0.722158495	0.069092647	protein_coding	protein_coding
-1.559019662	0.210342177	0.720958164	-2.162427363	0.03058525	65	530	DST	LRBA	57	UCEC	0.051195806	0.86420812	0.069092647	protein_coding	protein_coding
-1.55104759	0.212025741	0.720466104	-2.152839089	0.031331327	65	530	PIK3CA	LRP2	57	UCEC	0.051655368	0.870285442	0.069092647	protein_coding	protein_coding
-1.615828893	0.19872588	0.720449273	-2.242807306	0.024909243	65	530	DNAH5	MACF1	57	UCEC	0.048416749	0.815667634	0.069092647	protein_coding	protein_coding
-2.275588264	0.102736454	1.009197912	-2.254848368	0.024142848	65	530	TAF1	MACF1	57	UCEC	0.014212745	0.742627759	0.069092647	protein_coding	protein_coding
-1.609582557	0.199971073	0.720601317	-2.233665856	0.025505067	65	530	HMCN1	MACF1	57	UCEC	0.048705606	0.821023147	0.069092647	protein_coding	protein_coding
-1.469388381	0.230066155	0.720001047	-2.040814228	0.041269296	65	530	PTEN	MAF	57	UCEC	0.056101629	0.943474135	0.069092647	protein_coding	protein_coding
-1.539961207	0.214389418	0.720187645	-2.138277737	0.032494208	65	530	PTEN	MAGEC1	57	UCEC	0.05225974	0.879507292	0.069092647	protein_coding	protein_coding
-1.572240097	0.207579662	0.72059693	-2.181857889	0.029120023	65	530	TTN	MAP3K1	57	UCEC	0.050559214	0.852254478	0.069092647	protein_coding	protein_coding
-1.648307938	0.192375144	0.720594271	-2.28742859	0.022170819	65	530	PTEN	MAP3K1	57	UCEC	0.046856164	0.789825561	0.069092647	protein_coding	protein_coding
-2.281643818	0.102116208	1.009447836	-2.260288977	0.023803322	65	530	PTEN	MCF2	57	UCEC	0.014120021	0.738505996	0.069092647	protein_coding	protein_coding
-1.532774012	0.215935827	0.720709299	-2.126757647	0.033440225	65	530	PIK3CA	MED13L	57	UCEC	0.052582904	0.886757448	0.069092647	protein_coding	protein_coding
-2.248047897	0.105605176	1.009265772	-2.22740923	0.025919936	65	530	CSMD3	MKI67	57	UCEC	0.014607666	0.763465774	0.069092647	protein_coding	protein_coding
-2.316394351	0.098628565	1.009282092	-2.295091105	0.021727904	65	530	ZFHX4	MKI67	57	UCEC	0.013642201	0.713051628	0.069092647	protein_coding	protein_coding
-1.54818959	0.212632578	0.720145746	-2.149828141	0.031568811	65	530	NF1	MUC16	57	UCEC	0.051835748	0.87222843	0.069092647	protein_coding	protein_coding
-2.281145576	0.102167099	1.009430182	-2.259834922	0.023831498	65	530	PDE4DIP	MUC5B	57	UCEC	0.014127547	0.738848475	0.069092647	protein_coding	protein_coding
-2.367768938	0.09368952	1.009377958	-2.345770401	0.0189878	65	530	ANK3	MUC5B	57	UCEC	0.012956603	0.677471266	0.069092647	protein_coding	protein_coding
-1.599163325	0.20206551	0.720537982	-2.219401844	0.026459398	65	530	CSMD1	MUC5B	57	UCEC	0.049221844	0.829519318	0.069092647	protein_coding	protein_coding
-1.656757168	0.19075657	0.721065509	-2.29765139	0.021581638	65	530	PTEN	MYO9A	57	UCEC	0.04641904	0.783903956	0.069092647	protein_coding	protein_coding
-1.648911168	0.192259133	0.720563644	-2.28836298	0.022116392	65	530	TTN	MYO9A	57	UCEC	0.046830719	0.789301876	0.069092647	protein_coding	protein_coding
-1.606540723	0.200580278	0.72024886	-2.230535599	0.025711907	65	530	KMT2C	NBEA	57	UCEC	0.048887747	0.822955659	0.069092647	protein_coding	protein_coding
-1.586888476	0.204561119	0.720165526	-2.203505192	0.027559161	65	530	FLG	NEB	57	UCEC	0.049866148	0.839151477	0.069092647	protein_coding	protein_coding
-2.294655892	0.100796072	1.009258506	-2.273605699	0.022989705	65	530	LRP1B	NEB	57	UCEC	0.013942653	0.728688294	0.069092647	protein_coding	protein_coding
-1.525541315	0.217503287	0.720324975	-2.11785148	0.034187648	65	530	MUC16	NHS	57	UCEC	0.05300451	0.892521779	0.069092647	protein_coding	protein_coding
-2.228804792	0.107657026	1.009151525	-2.2085928	0.027202977	65	530	PTEN	NRXN3	57	UCEC	0.01489482	0.778125231	0.069092647	protein_coding	protein_coding
-2.210627935	0.109631785	1.008989136	-2.190933336	0.028456617	65	530	MUC16	NSD1	57	UCEC	0.015172865	0.792146264	0.069092647	protein_coding	protein_coding
-2.192272368	0.111662721	1.009024244	-2.172665702	0.029805487	65	530	ZFHX4	PCDH19	57	UCEC	0.01545288	0.806876346	0.069092647	protein_coding	protein_coding
-1.533460142	0.215787718	0.720512429	-2.128291033	0.033312961	65	530	MACF1	PCDH9	57	UCEC	0.052567117	0.885807358	0.069092647	protein_coding	protein_coding
-2.314508679	0.098814722	1.00938713	-2.292984138	0.021848918	65	530	DST	PCDH9	57	UCEC	0.013665137	0.71454457	0.069092647	protein_coding	protein_coding
-1.574258443	0.207161117	0.720295779	-2.185572217	0.028846917	65	530	RYR2	PCLO	57	UCEC	0.050487062	0.850034182	0.069092647	protein_coding	protein_coding
-2.287180383	0.101552397	1.009335187	-2.2660266	0.023449755	65	530	NEB	PDE4DIP	57	UCEC	0.014045161	0.734266369	0.069092647	protein_coding	protein_coding
-1.479180552	0.227824302	0.719971193	-2.054499633	0.039927359	65	530	TTN	PIEZO2	57	UCEC	0.055558204	0.934225894	0.069092647	protein_coding	protein_coding
-1.202389349	0.300475413	0.593917059	-2.024507178	0.042917994	65	530	MUC17	PIK3CA	57	UCEC	0.093811598	0.962412705	0.069092647	protein_coding	protein_coding
-1.602418729	0.201408775	0.720430235	-2.22425247	0.026131463	65	530	DST	PKHD1L1	57	UCEC	0.04907223	0.826648695	0.069092647	protein_coding	protein_coding
-1.214190528	0.29695029	0.593914461	-2.044386199	0.04091541	65	530	PTEN	PTPRB	57	UCEC	0.092711489	0.951117011	0.069092647	protein_coding	protein_coding
-2.28612046	0.101660092	1.009187951	-2.265306931	0.023493851	65	530	TTN	PTPRZ1	57	UCEC	0.014064114	0.734832956	0.069092647	protein_coding	protein_coding
-2.321864183	0.098090556	1.009248579	-2.300587022	0.021414985	65	530	PTEN	PTPRZ1	57	UCEC	0.013568676	0.709115423	0.069092647	protein_coding	protein_coding
-2.28971993	0.101294828	1.009151367	-2.268955881	0.023271009	65	530	TTN	RGPD3	57	UCEC	0.014014586	0.732140203	0.069092647	protein_coding	protein_coding
-1.598871209	0.202124546	0.720228871	-2.219948788	0.026422244	65	530	RYR3	RYR1	57	UCEC	0.049266064	0.829259105	0.069092647	protein_coding	protein_coding
-2.319698335	0.098303236	1.009176742	-2.298604633	0.0215274	65	530	ANK3	RYR1	57	UCEC	0.01360001	0.710552871	0.069092647	protein_coding	protein_coding
-2.333028776	0.097001506	1.009267548	-2.311605858	0.020799414	65	530	DNAH5	RYR1	57	UCEC	0.013417531	0.701268542	0.069092647	protein_coding	protein_coding
-2.226652984	0.107888932	1.009103822	-2.206564811	0.027344478	65	530	TTN	SEC16A	57	UCEC	0.014928301	0.779728503	0.069092647	protein_coding	protein_coding
-1.518669648	0.219003044	0.720588099	-2.107541951	0.035070629	65	530	PTEN	SOX6	57	UCEC	0.053342477	0.899139599	0.069092647	protein_coding	protein_coding
-2.279368082	0.102348862	1.009266295	-2.258440706	0.023918197	65	530	NBEA	SYNE1	57	UCEC	0.014157227	0.739925225	0.069092647	protein_coding	protein_coding
-2.207881159	0.109933333	1.009110117	-2.18794869	0.02867334	65	530	AHNAK2	SYNE1	57	UCEC	0.015210991	0.794513478	0.069092647	protein_coding	protein_coding
-2.261872972	0.104155222	1.009206787	-2.241238367	0.025010639	65	530	NEB	SYNE2	57	UCEC	0.014408769	0.752896381	0.069092647	protein_coding	protein_coding
-2.301130195	0.100145596	1.009289698	-2.279950146	0.022610645	65	530	DNAH5	SYNE2	57	UCEC	0.013851829	0.724030047	0.069092647	protein_coding	protein_coding
-2.304408562	0.099817819	1.009233507	-2.28332546	0.022411204	65	530	PCLO	SYNE2	57	UCEC	0.013808013	0.721580822	0.069092647	protein_coding	protein_coding
-2.304579462	0.099800762	1.009247605	-2.283462899	0.022403116	65	530	CSMD3	SYNE2	57	UCEC	0.013805271	0.721477449	0.069092647	protein_coding	protein_coding
-2.219901756	0.10861978	1.009226297	-2.199607523	0.027834753	65	530	PDE4DIP	SYNE2	57	UCEC	0.015025819	0.785198903	0.069092647	protein_coding	protein_coding
-1.60513794	0.200861846	0.72021009	-2.228707931	0.025833344	65	530	PTEN	TAB3	57	UCEC	0.048960094	0.824048276	0.069092647	protein_coding	protein_coding
-1.449265978	0.234742531	0.720131681	-2.012501346	0.044167115	65	530	AHNAK2	TENM1	57	UCEC	0.057227308	0.962897913	0.069092647	protein_coding	protein_coding
-2.29144122	0.10112062	1.009231695	-2.270480833	0.023178425	65	530	GPR98	TENM1	57	UCEC	0.013988281	0.730996141	0.069092647	protein_coding	protein_coding
-1.564687847	0.209153291	0.720359512	-2.172092989	0.02984865	65	530	PCDH15	TENM1	57	UCEC	0.050966206	0.858315782	0.069092647	protein_coding	protein_coding
-2.267488365	0.103571989	1.009075812	-2.247094161	0.02463401	65	530	DNAH14	TENM1	57	UCEC	0.014331764	0.748488249	0.069092647	protein_coding	protein_coding
-1.669301498	0.188378603	0.720412568	-2.317146552	0.02049575	65	530	CACNA1E	TENM1	57	UCEC	0.045899083	0.773141755	0.069092647	protein_coding	protein_coding
-2.312565999	0.099006874	1.009431851	-2.290958024	0.021965842	65	530	FAT2	TENM1	57	UCEC	0.013690509	0.715996807	0.069092647	protein_coding	protein_coding
-1.604111547	0.201068115	0.720597477	-2.226085433	0.026008459	65	530	TTN	TEX15	57	UCEC	0.048973174	0.82552107	0.069092647	protein_coding	protein_coding
-1.648054804	0.192423847	0.720614412	-2.287013384	0.022195042	65	530	PTEN	TEX15	57	UCEC	0.046866176	0.790056705	0.069092647	protein_coding	protein_coding
-2.285382789	0.101735112	1.009409495	-2.264078948	0.02356926	65	530	MUC16	TG	57	UCEC	0.014068382	0.73569461	0.069092647	protein_coding	protein_coding
-1.63110922	0.195712366	0.720529269	-2.263765389	0.023588548	65	530	MUC5B	TNRC6B	57	UCEC	0.047675073	0.803424668	0.069092647	protein_coding	protein_coding
-1.557164417	0.210732775	0.720385936	-2.161569708	0.030651358	65	530	MACF1	TNRC6B	57	UCEC	0.051348433	0.864842402	0.069092647	protein_coding	protein_coding
-1.500953772	0.222917446	0.720190806	-2.084105712	0.037150553	65	530	FLG	TNRC6B	57	UCEC	0.054338203	0.914498188	0.069092647	protein_coding	protein_coding
-1.709688738	0.180922098	0.720942651	-2.371462884	0.017717826	65	530	PCLO	UBR4	57	UCEC	0.044036505	0.743310707	0.069092647	protein_coding	protein_coding
-2.324632587	0.097819378	1.00946751	-2.302830517	0.021288381	65	530	NEB	USH2A	57	UCEC	0.013525359	0.707458528	0.069092647	protein_coding	protein_coding
-2.345209891	0.095827087	1.009305657	-2.323587382	0.020147619	65	530	DNAH8	USH2A	57	UCEC	0.013254092	0.692829874	0.069092647	protein_coding	protein_coding
-2.306156279	0.099643518	1.009299418	-2.284907964	0.022318225	65	530	MKI67	USH2A	57	UCEC	0.013782121	0.720413866	0.069092647	protein_coding	protein_coding
-1.557983441	0.210560251	0.720278131	-2.163030328	0.030538847	65	530	ANK2	USH2A	57	UCEC	0.051317237	0.863951794	0.069092647	protein_coding	protein_coding
-1.665337286	0.189126857	0.720642347	-2.310906781	0.020838004	65	530	DNAH3	USH2A	57	UCEC	0.046060649	0.776562394	0.069092647	protein_coding	protein_coding
-1.63114897	0.195704586	0.720616318	-2.26354709	0.023601985	65	530	ANK3	USH2A	57	UCEC	0.047665045	0.803529816	0.069092647	protein_coding	protein_coding
-1.564208473	0.209253577	0.720284142	-2.171654743	0.029881715	65	530	SYNE1	USP34	57	UCEC	0.050998177	0.858600488	0.069092647	protein_coding	protein_coding
-1.513065299	0.22023386	0.720059659	-2.101305467	0.03561416	65	530	ASH1L	UTRN	57	UCEC	0.053697855	0.903256813	0.069092647	protein_coding	protein_coding
-1.56825479	0.208408582	0.720140421	-2.177706935	0.029427862	65	530	RYR2	XIST	57	UCEC	0.050806549	0.854892487	0.069092647	protein_coding	none protein_coding
-1.535493534	0.215349383	0.720580544	-2.130911732	0.033096415	65	530	LRP2	ZFHX3	57	UCEC	0.052453333	0.884126021	0.069092647	protein_coding	protein_coding
-1.190436711	0.304088436	0.593728424	-2.005018898	0.044961027	65	530	MUC17	ZFHX4	57	UCEC	0.09497473	0.973625059	0.069092647	protein_coding	protein_coding
-2.281837283	0.102096454	1.009141906	-2.261165916	0.023748985	65	530	NF1	ZFHX4	57	UCEC	0.014125757	0.737920527	0.069092647	protein_coding	protein_coding
-2.343733849	0.095968636	1.009389745	-2.321931505	0.020236624	65	530	DNAH5	ZFHX4	57	UCEC	0.013271482	0.693967639	0.069092647	protein_coding	protein_coding
-2.281063464	0.102175489	1.00928606	-2.260076261	0.023816518	65	530	KMT2C	ZFHX4	57	UCEC	0.014132698	0.738700449	0.069092647	protein_coding	protein_coding
-2.376271233	0.092896321	1.009487813	-2.353937515	0.018575733	65	530	HUWE1	ZNF292	57	UCEC	0.012844143	0.671880272	0.069092647	protein_coding	protein_coding
-2.357099872	0.094694451	1.009371706	-2.335214924	0.019532196	65	530	ZFHX3	ZNF292	57	UCEC	0.013095738	0.684729556	0.069092647	protein_coding	protein_coding
-2.337089167	0.09660844	1.009208887	-2.315763561	0.020571182	65	530	PCLO	ZNF292	57	UCEC	0.013364697	0.698346593	0.069092647	protein_coding	protein_coding
-2.367907244	0.093676563	1.00938463	-2.345891917	0.018981611	65	530	DST	ZNF292	57	UCEC	0.012954642	0.677386431	0.069092647	protein_coding	protein_coding
-2.18283399	0.112721626	1.009058755	-2.163237748	0.030522898	64	530	PIK3CA	ABCA12	57	UCEC	0.015598365	0.814583101	0.069092647	protein_coding	protein_coding
-1.593505921	0.203211916	0.720421894	-2.211906571	0.026973121	64	530	RYR2	ABCA13	57	UCEC	0.049512365	0.834035752	0.069092647	protein_coding	protein_coding
-2.356324853	0.09476787	1.009450488	-2.334264911	0.019581855	64	530	ATRX	ABCA13	57	UCEC	0.013103868	0.68536626	0.069092647	protein_coding	protein_coding
-2.340477745	0.096281629	1.00939637	-2.318690471	0.020411826	64	530	MACF1	ABCA13	57	UCEC	0.013314593	0.696239994	0.069092647	protein_coding	protein_coding
-2.316650622	0.098603293	1.009468444	-2.294921289	0.021737636	64	530	DNAH10	ABCA13	57	UCEC	0.013633725	0.71312934	0.069092647	protein_coding	protein_coding
-2.327926936	0.097497657	1.009383093	-2.306286833	0.02109461	64	530	PIK3CA	ABCA13	57	UCEC	0.013483106	0.705015088	0.069092647	protein_coding	protein_coding
-2.345240407	0.095824163	1.009430299	-2.323330704	0.020161394	64	530	DNAH8	ABCA13	57	UCEC	0.01325045	0.692978003	0.069092647	protein_coding	protein_coding
-2.249994606	0.105399793	1.009522506	-2.228771119	0.025829137	64	530	ARID1A	AFF2	57	UCEC	0.014571923	0.762364498	0.069092647	protein_coding	protein_coding
-1.484682575	0.22657425	0.720526053	-2.060553632	0.039345644	64	530	CSMD3	AHNAK	57	UCEC	0.055193304	0.930110845	0.069092647	protein_coding	protein_coding
-2.227875497	0.107757117	1.009169352	-2.207632934	0.027269871	64	530	RYR3	ANK2	57	UCEC	0.014908147	0.778875888	0.069092647	protein_coding	protein_coding
-2.22603877	0.10795522	1.009127732	-2.205903872	0.027390731	64	530	FLG	ANK2	57	UCEC	0.014936773	0.780244134	0.069092647	protein_coding	protein_coding
-1.641279013	0.193732098	0.720711723	-2.277303061	0.022768134	64	530	HMCN1	ANK3	57	UCEC	0.047175811	0.795579869	0.069092647	protein_coding	protein_coding
-1.598503026	0.202198978	0.720408304	-2.218884787	0.026494564	64	530	CSMD3	ANK3	57	UCEC	0.049266876	0.829856279	0.069092647	protein_coding	protein_coding
-1.629256712	0.19607526	0.720578264	-2.261040604	0.023756743	64	530	RYR3	ANK3	57	UCEC	0.047758887	0.804991697	0.069092647	protein_coding	protein_coding
-1.576289521	0.206740784	0.720129857	-2.188896219	0.028604384	64	530	TTN	ANKRD30B	57	UCEC	0.050401011	0.848033617	0.069092647	protein_coding	protein_coding
-2.350970457	0.095276655	1.009647977	-2.328505094	0.019885299	64	530	MACF1	APC	57	UCEC	0.013169121	0.689312591	0.069092647	protein_coding	protein_coding
-1.540118748	0.214355646	0.720305809	-2.138145673	0.032504922	64	530	CSMD3	ARHGAP35	57	UCEC	0.052239408	0.879572431	0.069092647	protein_coding	protein_coding
-2.233975568	0.107101792	1.009180611	-2.213652881	0.026852667	64	530	MUC16	ARHGAP35	57	UCEC	0.014817156	0.774156237	0.069092647	protein_coding	protein_coding
-1.543232168	0.213689304	0.720554216	-2.141729427	0.032215261	64	530	DST	ARHGAP35	57	UCEC	0.052051668	0.877265229	0.069092647	protein_coding	protein_coding
-2.214094541	0.109252393	1.009209296	-2.193890356	0.028243293	64	530	HERC1	ARID1A	57	UCEC	0.015113835	0.78974567	0.069092647	protein_coding	protein_coding
-1.541595404	0.21403935	0.720256488	-2.140342267	0.032327117	64	530	ABCA12	ARID1A	57	UCEC	0.052167368	0.878189666	0.069092647	protein_coding	protein_coding
-1.498821584	0.223393255	0.720482828	-2.080301606	0.037497878	64	530	PLXNA2	ARID1A	57	UCEC	0.054423027	0.916974843	0.069092647	protein_coding	protein_coding
-1.587240104	0.204489203	0.720292298	-2.203605547	0.027552097	64	530	HECTD4	ARID1A	57	UCEC	0.049836232	0.839064919	0.069092647	protein_coding	protein_coding
-2.180940359	0.112935281	1.009140922	-2.161185133	0.030681041	64	530	KIAA1109	ARID1A	57	UCEC	0.015625414	0.816258528	0.069092647	protein_coding	protein_coding
-1.588082963	0.20431692	0.720592619	-2.203856828	0.027534415	64	530	FAM135B	ARID1A	57	UCEC	0.049764943	0.83885163	0.069092647	protein_coding	protein_coding
-1.504055602	0.222227065	0.720171167	-2.088469618	0.036755493	64	530	RBFOX1	ARID1A	57	UCEC	0.054172001	0.911630874	0.069092647	protein_coding	protein_coding
-1.538613622	0.214678521	0.720714077	-2.134846078	0.032773585	64	530	RNF213	ARID1A	57	UCEC	0.052276245	0.881602478	0.069092647	protein_coding	protein_coding
-1.421854562	0.241266159	0.720120788	-1.974466765	0.048328693	64	530	BCL11A	ARID1A	57	UCEC	0.058818944	0.98963626	0.069092647	protein_coding	protein_coding
-1.433591866	0.238450899	0.719929601	-1.991294516	0.046448518	64	530	PTEN	ARID2	57	UCEC	0.058154391	0.977722053	0.069092647	protein_coding	protein_coding
-1.433909321	0.238375213	0.719938746	-1.991710168	0.046402867	64	530	TTN	ARID2	57	UCEC	0.058134891	0.97742924	0.069092647	protein_coding	protein_coding
-2.239466672	0.106515297	1.009420198	-2.218567329	0.026516174	64	530	ARID1A	ARID4B	57	UCEC	0.014729098	0.770278543	0.069092647	protein_coding	protein_coding
-2.250943257	0.105299853	1.009237937	-2.230339521	0.025724911	64	530	DNAH5	ASH1L	57	UCEC	0.014566228	0.761216931	0.069092647	protein_coding	protein_coding
-1.451292852	0.234267219	0.720143292	-2.015283441	0.043874959	64	530	AHNAK2	ASH1L	57	UCEC	0.057110134	0.960970086	0.069092647	protein_coding	protein_coding
-2.2133633	0.109332312	1.009094957	-2.19341429	0.028277544	64	530	LRP1B	ASH1L	57	UCEC	0.01512828	0.790146282	0.069092647	protein_coding	protein_coding
-1.471257532	0.229636528	0.720214255	-2.042805347	0.041071711	64	530	COL6A3	ASH1L	57	UCEC	0.055973469	0.942105899	0.069092647	protein_coding	protein_coding
-1.531486839	0.216213953	0.720581188	-2.125349459	0.033557464	64	530	PIK3CA	ASPM	57	UCEC	0.052663853	0.887676672	0.069092647	protein_coding	protein_coding
-2.245642438	0.10585951	1.009276466	-2.225002281	0.026081085	64	530	USH2A	ASPM	57	UCEC	0.01464254	0.76532051	0.069092647	protein_coding	protein_coding
-2.312037591	0.099059204	1.009551545	-2.290162995	0.02201187	64	530	MACF1	ASPM	57	UCEC	0.013694532	0.716543328	0.069092647	protein_coding	protein_coding
-2.238659586	0.106601299	1.009257817	-2.218124594	0.026546338	64	530	ASH1L	ATM	57	UCEC	0.014745683	0.770655164	0.069092647	protein_coding	protein_coding
-2.363039924	0.094133629	1.010436026	-2.33863388	0.01935439	64	530	MACF1	ATM	57	UCEC	0.012991051	0.682095697	0.069092647	protein_coding	protein_coding
-2.247294172	0.105684803	1.00917746	-2.226857278	0.025956814	64	530	MACF1	BIRC6	57	UCEC	0.014621211	0.763909196	0.069092647	protein_coding	protein_coding
-1.475052953	0.228766613	0.719991671	-2.048708358	0.040490641	64	530	TTN	BTBD7	57	UCEC	0.055785761	0.938127625	0.069092647	protein_coding	protein_coding
-2.214588041	0.10919849	1.009198654	-2.194402491	0.028206487	64	530	ZFHX4	CACNA1C	57	UCEC	0.015106693	0.789339563	0.069092647	protein_coding	protein_coding
-1.521742901	0.218331026	0.720145138	-2.113105846	0.034591709	64	530	MUC16	CACNA1C	57	UCEC	0.053224984	0.895602654	0.069092647	protein_coding	protein_coding
-2.270018303	0.103310289	1.009201751	-2.249320615	0.024492105	64	530	RYR1	CACNA1E	57	UCEC	0.014292023	0.746781327	0.069092647	protein_coding	protein_coding
-1.583152126	0.205326861	0.720220972	-2.198147773	0.027938577	64	530	PIK3R1	CACNA1E	57	UCEC	0.050047375	0.842384245	0.069092647	protein_coding	protein_coding
-1.591905222	0.203537458	0.720592169	-2.209162534	0.027163338	64	530	PIK3CA	CACNA1E	57	UCEC	0.049575135	0.835650705	0.069092647	protein_coding	protein_coding
-1.615814673	0.198728706	0.720569453	-2.242413504	0.02493466	64	530	USH2A	CACNA1E	57	UCEC	0.048406034	0.815871392	0.069092647	protein_coding	protein_coding
-2.229828403	0.107546883	1.009123348	-2.209668824	0.027128155	64	530	PTEN	CADPS	57	UCEC	0.014880403	0.777286213	0.069092647	protein_coding	protein_coding
-2.312443508	0.099019002	1.009338654	-2.291048202	0.021960626	64	530	PTEN	CCDC88A	57	UCEC	0.013694688	0.715953723	0.069092647	protein_coding	protein_coding
-1.501126957	0.222878844	0.720151287	-2.084460562	0.037118294	64	530	PIK3CA	CDH23	57	UCEC	0.054333001	0.914269005	0.069092647	protein_coding	protein_coding
-1.525337831	0.21754755	0.720245699	-2.117802068	0.034191834	64	530	RYR2	CEP170	57	UCEC	0.053023535	0.892564712	0.069092647	protein_coding	protein_coding
-1.499729771	0.223190464	0.72018012	-2.082437059	0.037302566	64	530	ZFHX3	CEP170	57	UCEC	0.054405893	0.915599043	0.069092647	protein_coding	protein_coding
-1.521099775	0.218471485	0.720350431	-2.111610836	0.034719842	64	530	PCLO	CEP290	57	UCEC	0.053237799	0.896539496	0.069092647	protein_coding	protein_coding
-1.575405088	0.206923713	0.721104709	-2.184710582	0.028910074	64	530	DST	CEP350	57	UCEC	0.050349312	0.850407308	0.069092647	protein_coding	protein_coding
-1.573497663	0.207318782	0.720218761	-2.184749619	0.02890721	64	530	DST	CHD4	57	UCEC	0.050533114	0.850552711	0.069092647	protein_coding	protein_coding
-1.598083397	0.202283844	0.720301183	-2.218632198	0.026511757	64	530	PTEN	CHD6	57	UCEC	0.049297904	0.830030296	0.069092647	protein_coding	protein_coding
-1.520114532	0.218686839	0.720160854	-2.110798612	0.034789625	64	530	TTN	CHD9	57	UCEC	0.053310082	0.897089847	0.069092647	protein_coding	protein_coding
-1.555048901	0.211179056	0.720355443	-2.15872444	0.030871552	64	530	DST	CLCN5	57	UCEC	0.051460252	0.866622131	0.069092647	protein_coding	protein_coding
-1.588134142	0.204306463	0.720484454	-2.204258722	0.027506154	64	530	ARID1A	CLCN5	57	UCEC	0.049772947	0.838630888	0.069092647	protein_coding	protein_coding
-1.203047831	0.30027762	0.59447737	-2.023706692	0.04300034	64	530	TTN	CNTNAP5	57	UCEC	0.093646945	0.962835996	0.069092647	protein_coding	protein_coding
-2.307835912	0.099476294	1.0091938	-2.286811425	0.022206832	64	530	PTEN	CRB1	57	UCEC	0.01376184	0.719055981	0.069092647	protein_coding	protein_coding
-2.299933479	0.100265513	1.009075261	-2.279248702	0.022652285	64	530	TTN	CRB1	57	UCEC	0.013874246	0.724592416	0.069092647	protein_coding	protein_coding
-1.595319397	0.20284373	0.720244736	-2.214968493	0.026762227	64	530	NEB	CSMD1	57	UCEC	0.049439821	0.832235592	0.069092647	protein_coding	protein_coding
-1.211710092	0.29768777	0.594571629	-2.037954777	0.041554456	64	530	ZFHX3	CSMD2	57	UCEC	0.092822103	0.954708044	0.069092647	protein_coding	protein_coding
-2.24800807	0.105609382	1.009257502	-2.227388022	0.025921352	64	530	FLG	CSMD3	57	UCEC	0.014608485	0.763483804	0.069092647	protein_coding	protein_coding
-1.528259781	0.216912815	0.72008372	-2.12233625	0.033809511	64	530	DST	CTCF	57	UCEC	0.052885617	0.88967799	0.069092647	protein_coding	protein_coding
-2.245144872	0.105912196	1.009142497	-2.224804602	0.026094358	64	530	FAT1	CTCF	57	UCEC	0.014653674	0.765500372	0.069092647	protein_coding	protein_coding
-1.514323149	0.219957013	0.720105656	-2.102918003	0.035472938	64	530	SYNE1	CTCF	57	UCEC	0.053625518	0.902202699	0.069092647	protein_coding	protein_coding
-2.248546879	0.105552494	1.009183999	-2.228084155	0.025874904	64	530	TTN	CUX1	57	UCEC	0.014602719	0.76296262	0.069092647	protein_coding	protein_coding
-2.296640802	0.100596199	1.009396761	-2.275260721	0.022890294	64	530	ZFHX4	DCHS1	57	UCEC	0.013911236	0.727440442	0.069092647	protein_coding	protein_coding
-2.299125885	0.10034652	1.009453681	-2.277594235	0.022750764	64	530	MUC5B	DCHS1	57	UCEC	0.01387516	0.725715896	0.069092647	protein_coding	protein_coding
-1.551209223	0.211991474	0.720275256	-2.15363392	0.031268892	64	530	SYNE1	DCHS1	57	UCEC	0.051666342	0.86981936	0.069092647	protein_coding	protein_coding
-1.513285498	0.22018537	0.720247271	-2.101063843	0.035635362	64	530	TTN	DICER1	57	UCEC	0.053666294	0.90339007	0.069092647	protein_coding	protein_coding
-1.469462861	0.23004902	0.7200713	-2.040718553	0.04127881	64	530	PTEN	DIDO1	57	UCEC	0.056089727	0.943533779	0.069092647	protein_coding	protein_coding
-1.611556086	0.199576814	0.720531793	-2.236620372	0.025311162	64	530	ZFHX3	DMXL1	57	UCEC	0.048616203	0.819292781	0.069092647	protein_coding	protein_coding
-1.52095254	0.218503654	0.720320039	-2.111495527	0.034729742	64	530	ASH1L	DNAH11	57	UCEC	0.05324881	0.896618097	0.069092647	protein_coding	protein_coding
-2.298589531	0.100400355	1.009324461	-2.27735443	0.022765069	64	530	NEB	DNAH11	57	UCEC	0.01388612	0.725921361	0.069092647	protein_coding	protein_coding
-2.361860404	0.094244727	1.009459219	-2.339728401	0.019297768	64	530	DST	DNAH3	57	UCEC	0.013031308	0.681594526	0.069092647	protein_coding	protein_coding
-1.612949842	0.199298846	0.720373909	-2.239045337	0.025152966	64	530	DNAH10	DNAH7	57	UCEC	0.048563517	0.817898543	0.069092647	protein_coding	protein_coding
-1.514942665	0.219820788	0.72023569	-2.103398492	0.03543095	64	530	CSMD1	DNAH7	57	UCEC	0.05357865	0.901873771	0.069092647	protein_coding	protein_coding
-1.552366668	0.211746247	0.720350445	-2.155015908	0.031160589	64	530	SYNE2	DNAH7	57	UCEC	0.051598971	0.868941221	0.069092647	protein_coding	protein_coding
-2.372205517	0.09327478	1.009337379	-2.350260246	0.018760289	64	530	FAT3	DNAH8	57	UCEC	0.012900273	0.674418626	0.069092647	protein_coding	protein_coding
-2.263753289	0.103959561	1.009176899	-2.243167963	0.024885985	64	530	AHNAK	DNAH8	57	UCEC	0.014382544	0.751438006	0.069092647	protein_coding	protein_coding
-1.656387559	0.190827088	0.72064413	-2.298481996	0.021534371	64	530	DNAH10	DNAH8	57	UCEC	0.046474567	0.783546348	0.069092647	protein_coding	protein_coding
-1.579316445	0.206115942	0.720469472	-2.192065737	0.02837476	64	530	PDE4DIP	DNAH8	57	UCEC	0.050215245	0.846033536	0.069092647	protein_coding	protein_coding
-2.35051364	0.095320189	1.009474405	-2.328452935	0.019888066	64	530	ATRX	DNAH8	57	UCEC	0.013179621	0.68939298	0.069092647	protein_coding	protein_coding
-1.585259701	0.204894575	0.720259239	-2.200957121	0.02773906	64	530	HMCN1	DNAH8	57	UCEC	0.049938261	0.840673778	0.069092647	protein_coding	protein_coding
-2.282861687	0.10199192	1.00916087	-2.26213853	0.023688846	64	530	NEB	DNAH8	57	UCEC	0.014110769	0.737192386	0.069092647	protein_coding	protein_coding
-1.642672393	0.193462343	0.72044341	-2.28008525	0.022602633	64	530	DNAH5	DNAH8	57	UCEC	0.047134905	0.794054398	0.069092647	protein_coding	protein_coding
-1.52333262	0.217984217	0.720236906	-2.115043825	0.034426212	64	530	DNAH5	DNAH9	57	UCEC	0.053130881	0.894340875	0.069092647	protein_coding	protein_coding
-1.47973873	0.227697171	0.720224647	-2.05455164	0.039922331	64	530	PTEN	DOCK10	57	UCEC	0.055499624	0.934168527	0.069092647	protein_coding	protein_coding
-1.549858262	0.21227806	0.720428209	-2.151301466	0.031452413	64	530	ZFHX4	DOCK11	57	UCEC	0.051720681	0.871256399	0.069092647	protein_coding	protein_coding
-1.504878666	0.222044234	0.720263616	-2.08934428	0.036676743	64	530	PTEN	DSP	57	UCEC	0.054117625	0.911045918	0.069092647	protein_coding	protein_coding
-1.5429455	0.213750571	0.720727187	-2.140817676	0.032288744	64	530	DST	DYNC1H1	57	UCEC	0.052048943	0.877814297	0.069092647	protein_coding	protein_coding
-2.262247675	0.104116202	1.009371994	-2.241242761	0.025010354	64	530	NEB	DYNC2H1	57	UCEC	0.014398708	0.752858061	0.069092647	protein_coding	protein_coding
-2.254960928	0.104877641	1.009412247	-2.233934584	0.025487378	64	530	DMD	DYNC2H1	57	UCEC	0.014502867	0.758423817	0.069092647	protein_coding	protein_coding
-2.316902259	0.098578484	1.009336966	-2.295469539	0.02170623	64	530	PTEN	EPHB1	57	UCEC	0.013633808	0.712766212	0.069092647	protein_coding	protein_coding
-1.529080668	0.216734827	0.720675985	-2.121731125	0.033860323	64	530	TTN	F5	57	UCEC	0.052780916	0.88998049	0.069092647	protein_coding	protein_coding
-1.541838609	0.213987301	0.720619546	-2.139601426	0.032386991	64	530	PTEN	F5	57	UCEC	0.052117582	0.878601097	0.069092647	protein_coding	protein_coding
-2.303753682	0.099883209	1.009323573	-2.28247288	0.022461437	64	530	ATM	FAT1	57	UCEC	0.013814619	0.722181	0.069092647	protein_coding	protein_coding
-2.251263407	0.105266147	1.009247856	-2.230634818	0.025705329	64	530	GPR98	FAT1	57	UCEC	0.014561282	0.760988061	0.069092647	protein_coding	protein_coding
-1.528254314	0.216914001	0.720280404	-2.121749122	0.033858811	64	530	AHNAK	FAT1	57	UCEC	0.052865522	0.890025894	0.069092647	protein_coding	protein_coding
-2.235481131	0.106940665	1.009179093	-2.215148081	0.026749902	64	530	CACNA1C	FAT1	57	UCEC	0.014794909	0.772989272	0.069092647	protein_coding	protein_coding
-1.496824772	0.223839775	0.720268916	-2.078147118	0.037695811	64	530	MED13	FAT1	57	UCEC	0.054554676	0.918422553	0.069092647	protein_coding	protein_coding
-2.296355466	0.100624907	1.009394138	-2.274983952	0.022906893	64	530	ASPM	FAT1	57	UCEC	0.013915277	0.727644296	0.069092647	protein_coding	protein_coding
-2.314033508	0.098861687	1.009273747	-2.29277093	0.021861196	64	530	DNAH8	FAT1	57	UCEC	0.01367467	0.71472533	0.069092647	protein_coding	protein_coding
-2.324395624	0.09784256	1.00932571	-2.302919266	0.021283386	64	530	POLE	FAT1	57	UCEC	0.013532325	0.707429549	0.069092647	protein_coding	protein_coding
-1.519198378	0.218887282	0.720272743	-2.109198761	0.034927429	64	530	RNF213	FAT1	57	UCEC	0.053347244	0.898109032	0.069092647	protein_coding	protein_coding
-2.331258376	0.097173389	1.009344479	-2.30967566	0.020906117	64	530	NRK	FAT1	57	UCEC	0.013439279	0.702617103	0.069092647	protein_coding	protein_coding
-1.608399742	0.200207742	0.720625684	-2.231948955	0.025618337	64	530	FAT4	FAT2	57	UCEC	0.048760921	0.822034099	0.069092647	protein_coding	protein_coding
-1.181889314	0.306698741	0.594505042	-1.988022356	0.046809218	64	530	ATRX	FAT2	57	UCEC	0.095644298	0.983478569	0.069092647	protein_coding	protein_coding
-1.60041299	0.201813154	0.720503628	-2.221242099	0.026334568	64	530	RYR3	FAT2	57	UCEC	0.049163682	0.828427561	0.069092647	protein_coding	protein_coding
-2.261318648	0.104212974	1.009210138	-2.24068166	0.025046703	64	530	MUC16	FBN2	57	UCEC	0.014416664	0.753318793	0.069092647	protein_coding	protein_coding
-2.245555047	0.105868762	1.009092957	-2.225320305	0.026059743	64	530	PTEN	GOLGB1	57	UCEC	0.014649087	0.765112153	0.069092647	protein_coding	protein_coding
-2.280842799	0.102198038	1.009330883	-2.259757269	0.02383632	64	530	RYR2	GPR98	57	UCEC	0.014134575	0.738928386	0.069092647	protein_coding	protein_coding
-2.283735532	0.101902834	1.0095249	-2.262188413	0.023685765	64	530	PDE4DIP	GPR98	57	UCEC	0.014088388	0.737074189	0.069092647	protein_coding	protein_coding
-1.521739588	0.218331749	0.720282311	-2.11269882	0.034626554	64	530	FAT2	GPR98	57	UCEC	0.053210852	0.895846445	0.069092647	protein_coding	protein_coding
-1.519277985	0.218869857	0.720968086	-2.107274948	0.035093754	64	530	TTN	HELZ	57	UCEC	0.053270348	0.899262283	0.069092647	protein_coding	protein_coding
-2.255586173	0.104812088	1.009231865	-2.234953385	0.025420409	64	530	FLG	HERC2	57	UCEC	0.014498927	0.75768184	0.069092647	protein_coding	protein_coding
-1.554386852	0.211318913	0.720529316	-2.157284676	0.03098349	64	530	OBSCN	HERC2	57	UCEC	0.051476787	0.86749165	0.069092647	protein_coding	protein_coding
-2.271853438	0.103120875	1.009271262	-2.250983975	0.024386552	64	530	HUWE1	HERC2	57	UCEC	0.014263876	0.745513703	0.069092647	protein_coding	protein_coding
-1.538453729	0.214712849	0.720285678	-2.135893822	0.032688069	64	530	AHNAK	HMCN1	57	UCEC	0.052328524	0.881003394	0.069092647	protein_coding	protein_coding
-2.291681185	0.101096357	1.009253558	-2.270669413	0.023166998	64	530	SACS	HMCN1	57	UCEC	0.013984326	0.730852067	0.069092647	protein_coding	protein_coding
-2.278251492	0.102463208	1.009500243	-2.256811237	0.024019872	64	530	ASH1L	HMCN1	57	UCEC	0.014166547	0.741091621	0.069092647	protein_coding	protein_coding
-2.376491022	0.092875906	1.009651524	-2.35377352	0.01858393	64	530	TTN	HTT	57	UCEC	0.012837201	0.671948193	0.069092647	protein_coding	protein_coding
-2.265787778	0.103748272	1.009201686	-2.245128808	0.024759865	64	530	KMT2C	HUWE1	57	UCEC	0.014352616	0.749947201	0.069092647	protein_coding	protein_coding
-2.304477328	0.099810955	1.009302355	-2.283237839	0.022416362	64	530	DNAH2	HUWE1	57	UCEC	0.0138052	0.721628575	0.069092647	protein_coding	protein_coding
-1.644809363	0.193049362	0.720477424	-2.282943655	0.022433688	64	530	LRRK2	HUWE1	57	UCEC	0.047031151	0.792412165	0.069092647	protein_coding	protein_coding
-1.551433501	0.211943934	0.720279128	-2.153933718	0.03124537	64	530	PIK3R1	HUWE1	57	UCEC	0.051654364	0.869630901	0.069092647	protein_coding	protein_coding
-1.550348131	0.212174097	0.720397373	-2.152073549	0.031391562	64	530	MKI67	HUWE1	57	UCEC	0.051698476	0.870777072	0.069092647	protein_coding	protein_coding
-1.551904012	0.211844236	0.720236463	-2.154714585	0.031184176	64	530	KMT2C	IGF2R	57	UCEC	0.051634384	0.869149141	0.069092647	protein_coding	protein_coding
-2.231233203	0.107395907	1.009178162	-2.210940831	0.027039935	64	530	TTN	IGSF10	57	UCEC	0.014857917	0.776278442	0.069092647	protein_coding	protein_coding
-1.200158698	0.301146417	0.594010703	-2.020432783	0.043338516	64	530	ARID1A	JAK1	57	UCEC	0.094003837	0.964738962	0.069092647	protein_coding	protein_coding
-1.505822504	0.221834759	0.720163562	-2.090945145	0.036532982	64	530	DST	KIAA1109	57	UCEC	0.054077175	0.910007969	0.069092647	protein_coding	protein_coding
-2.304121744	0.099846453	1.009147658	-2.283235487	0.022416501	64	530	MACF1	KIAA2022	57	UCEC	0.013814298	0.721666373	0.069092647	protein_coding	protein_coding
-1.512348311	0.220391821	0.720254173	-2.099742518	0.035751497	64	530	ZFHX3	KMT2A	57	UCEC	0.053715886	0.904249345	0.069092647	protein_coding	protein_coding
-2.175251028	0.113579638	1.009608698	-2.154548621	0.031197173	64	530	ZFHX4	KMT2B	57	UCEC	0.015700165	0.821668722	0.069092647	protein_coding	protein_coding
-1.557197584	0.210725786	0.720188755	-2.162207578	0.03060218	64	530	FLG	KMT2C	57	UCEC	0.051366578	0.864479555	0.069092647	protein_coding	protein_coding
-1.479328594	0.227790577	0.720062625	-2.054444353	0.039932704	64	530	PXDN	KMT2D	57	UCEC	0.055540025	0.934255009	0.069092647	protein_coding	protein_coding
-1.461073623	0.231987074	0.720060779	-2.029097635	0.042448347	64	530	TAF1	KMT2D	57	UCEC	0.056563422	0.951462983	0.069092647	protein_coding	protein_coding
-1.453318576	0.233793139	0.720166506	-2.018031336	0.043587998	64	530	CIT	KMT2D	57	UCEC	0.056991968	0.959069031	0.069092647	protein_coding	protein_coding
-1.716776599	0.179644281	0.720759728	-2.381898617	0.017223639	64	530	DNAH3	KMT2D	57	UCEC	0.043741163	0.737796283	0.069092647	protein_coding	protein_coding
-2.330214342	0.097274895	1.009421075	-2.30846611	0.020973226	64	530	DNAH8	KMT2D	57	UCEC	0.013451298	0.703456643	0.069092647	protein_coding	protein_coding
-1.543022177	0.213734182	0.720610572	-2.141270524	0.032252229	64	530	FLNB	KMT2D	57	UCEC	0.052056849	0.877546392	0.069092647	protein_coding	protein_coding
-1.528603512	0.216838268	0.720420138	-2.121822298	0.033852663	64	530	OBSCN	LRP1B	57	UCEC	0.052832593	0.88995886	0.069092647	protein_coding	protein_coding
-1.472220423	0.22941552	0.720438165	-2.043506986	0.041002277	64	530	CSMD3	LRP2	57	UCEC	0.055895063	0.941612338	0.069092647	protein_coding	protein_coding
-1.631161768	0.195702082	0.720410185	-2.26421253	0.023561046	64	530	DST	LRRK2	57	UCEC	0.047683697	0.80319496	0.069092647	protein_coding	protein_coding
-2.271022061	0.103206643	1.009181148	-2.250361162	0.024426028	64	530	FLG	MACF1	57	UCEC	0.014278261	0.74600199	0.069092647	protein_coding	protein_coding
-2.229463553	0.107586129	1.009250392	-2.209029167	0.027172612	64	530	LRP2	MACF1	57	UCEC	0.014882127	0.777763501	0.069092647	protein_coding	protein_coding
-2.264272167	0.103905633	1.009151499	-2.243738596	0.024849225	64	530	DST	MED12	57	UCEC	0.014375799	0.751010813	0.069092647	protein_coding	protein_coding
-1.556244189	0.210926786	0.720250512	-2.160698484	0.030718638	64	530	ZFHX3	MED13	57	UCEC	0.051409351	0.865408884	0.069092647	protein_coding	protein_coding
-1.606352498	0.200618036	0.720362592	-2.229922146	0.025752612	64	530	MUC16	MGA	57	UCEC	0.048886051	0.823294079	0.069092647	protein_coding	protein_coding
-2.295288201	0.100732358	1.009258565	-2.274232075	0.022952037	64	530	RYR2	MKI67	57	UCEC	0.013933838	0.728227767	0.069092647	protein_coding	protein_coding
-1.444340403	0.235901625	0.72018496	-2.005513142	0.044908217	64	530	PIK3CA	MKI67	57	UCEC	0.057503876	0.967753493	0.069092647	protein_coding	protein_coding
-2.255228086	0.104849626	1.009161058	-2.234755363	0.025433414	64	530	SACS	MUC16	57	UCEC	0.014506133	0.757848022	0.069092647	protein_coding	protein_coding
-2.284784384	0.101796009	1.009199715	-2.263956628	0.023576783	64	530	POLE	MUC16	57	UCEC	0.014082592	0.735832372	0.069092647	protein_coding	protein_coding
-1.534686278	0.215523295	0.720265783	-2.130722179	0.033112037	64	530	RYR1	MUC5B	57	UCEC	0.05252809	0.884294308	0.069092647	protein_coding	protein_coding
-2.237223802	0.106754465	1.009450446	-2.216278978	0.026672402	64	530	ANK2	MUC5B	57	UCEC	0.014761296	0.772053888	0.069092647	protein_coding	protein_coding
-1.576992041	0.206595596	0.720568613	-2.188538348	0.028630411	64	530	DNAH10	MUC5B	57	UCEC	0.050322322	0.848167142	0.069092647	protein_coding	protein_coding
-2.304986106	0.099760187	1.009785513	-2.282649212	0.02245104	64	530	FAT2	MUC5B	57	UCEC	0.013785117	0.72194487	0.069092647	protein_coding	protein_coding
-1.554964063	0.211196972	0.720346629	-2.158633081	0.030878644	64	530	USP9X	MUC5B	57	UCEC	0.051465507	0.866680684	0.069092647	protein_coding	protein_coding
-1.531547509	0.216200836	0.720518043	-2.125619926	0.033534919	64	530	COL6A3	MUC5B	57	UCEC	0.052667176	0.887512969	0.069092647	protein_coding	protein_coding
-1.556003079	0.210977649	0.72033244	-2.160118013	0.030763535	64	530	DST	MYCBP2	57	UCEC	0.051413491	0.865756579	0.069092647	protein_coding	protein_coding
-1.565046604	0.209078269	0.720234174	-2.172969097	0.029782643	64	530	PTEN	MYO15A	57	UCEC	0.050960442	0.857797156	0.069092647	protein_coding	protein_coding
-2.225995982	0.107959839	1.009068192	-2.205991627	0.027384586	64	530	PTEN	NALCN	57	UCEC	0.014939155	0.780186468	0.069092647	protein_coding	protein_coding
-1.563670261	0.209366231	0.720371147	-2.170645321	0.029957993	64	530	RYR2	NBEA	57	UCEC	0.051016932	0.859209231	0.069092647	protein_coding	protein_coding
-2.293291751	0.100933666	1.009303673	-2.272152389	0.023077308	64	530	ZFHX4	NBEA	57	UCEC	0.01396045	0.729747604	0.069092647	protein_coding	protein_coding
-1.603324103	0.201226507	0.720351435	-2.225752633	0.026030755	64	530	TTN	NCKAP5	57	UCEC	0.049035394	0.825773059	0.069092647	protein_coding	protein_coding
-1.43794426	0.237415322	0.719909339	-1.997396314	0.045782148	64	530	TTN	NCOR2	57	UCEC	0.05790413	0.97343721	0.069092647	protein_coding	protein_coding
-2.2768475	0.102607167	1.00923366	-2.256016214	0.024069616	64	530	SACS	NEB	57	UCEC	0.014193865	0.741745173	0.069092647	protein_coding	protein_coding
-2.288094317	0.101459628	1.009163157	-2.267318523	0.023370775	64	530	USP9X	NEB	57	UCEC	0.014037063	0.733348292	0.069092647	protein_coding	protein_coding
-2.220615548	0.108542275	1.009291429	-2.200172799	0.027794637	64	530	DST	NHS	57	UCEC	0.015013181	0.784738806	0.069092647	protein_coding	protein_coding
-2.223586754	0.108220252	1.009295436	-2.203107905	0.027587144	64	530	SYNE1	NHS	57	UCEC	0.014968522	0.782416792	0.069092647	protein_coding	protein_coding
-1.540348052	0.214306499	0.720277554	-2.138547901	0.032472301	64	530	ZFHX3	NIPBL	57	UCEC	0.052230323	0.879322068	0.069092647	protein_coding	protein_coding
-1.499098546	0.223331392	0.719971326	-2.082164235	0.037327471	64	530	ZFHX3	NPAP1	57	UCEC	0.05446253	0.915802319	0.069092647	protein_coding	protein_coding
-2.319601862	0.09831272	1.009357274	-2.29809793	0.021556216	64	530	DST	NRK	57	UCEC	0.01359651	0.710872916	0.069092647	protein_coding	protein_coding
-2.350603528	0.095311622	1.009444027	-2.328612052	0.019879627	64	530	PCLO	NRK	57	UCEC	0.013179221	0.689289974	0.069092647	protein_coding	protein_coding
-1.476543944	0.228425778	0.720117859	-2.050419838	0.040323479	64	530	OBSCN	NSD1	57	UCEC	0.055688871	0.936961637	0.069092647	protein_coding	protein_coding
-2.279443727	0.10234112	1.009235059	-2.258585556	0.023909177	64	530	ZFHX4	PCDH15	57	UCEC	0.014157023	0.739823961	0.069092647	protein_coding	protein_coding
-2.206674669	0.110066047	1.00901429	-2.18696077	0.028745388	64	530	MUC16	PCDH19	57	UCEC	0.015232215	0.795323236	0.069092647	protein_coding	protein_coding
-2.194157512	0.111452419	1.009041114	-2.174497631	0.029667783	64	530	SYNE1	PCDH19	57	UCEC	0.015423267	0.80538333	0.069092647	protein_coding	protein_coding
-2.30364221	0.099894344	1.009447034	-2.282083292	0.022484423	64	530	ATRX	PDE4DIP	57	UCEC	0.013812816	0.722436304	0.069092647	protein_coding	protein_coding
-1.201471349	0.300751376	0.59471987	-2.020230715	0.043359462	64	530	PTEN	PLCE1	57	UCEC	0.093750124	0.964813555	0.069092647	protein_coding	protein_coding
-1.583129459	0.205331515	0.720429485	-2.197480103	0.027986176	64	530	PTEN	POM121	57	UCEC	0.050028059	0.842747688	0.069092647	protein_coding	protein_coding
-1.18323306	0.306286892	0.594105264	-1.99162191	0.046412558	64	530	TTN	ROS1	57	UCEC	0.095590735	0.981388628	0.069092647	protein_coding	protein_coding
-1.563629768	0.209374709	0.720248418	-2.170958978	0.029934273	64	530	KMT2C	RYR1	57	UCEC	0.051031272	0.859037356	0.069092647	protein_coding	protein_coding
-1.601081501	0.201678285	0.720271869	-2.222884955	0.026223559	64	530	FAT4	RYR1	57	UCEC	0.049153149	0.827497959	0.069092647	protein_coding	protein_coding
-2.360280343	0.094393757	1.009274874	-2.338590213	0.019356652	64	530	FAT3	RYR1	57	UCEC	0.013056632	0.682425722	0.069092647	protein_coding	protein_coding
-1.545359186	0.213235266	0.720329529	-2.14535032	0.031924848	64	530	DNAH5	RYR3	57	UCEC	0.05196395	0.875015823	0.069092647	protein_coding	protein_coding
-1.580524632	0.205867065	0.720423402	-2.19388297	0.028243824	64	530	FAT3	RYR3	57	UCEC	0.050159141	0.844935687	0.069092647	protein_coding	protein_coding
-2.284007631	0.10187511	1.009258248	-2.263055701	0.023632256	64	530	ZFHX4	SCN1A	57	UCEC	0.014091919	0.736488641	0.069092647	protein_coding	protein_coding
-2.251668947	0.105223466	1.009202529	-2.231136846	0.025672066	64	530	PTEN	SEMA6D	57	UCEC	0.014556671	0.760611936	0.069092647	protein_coding	protein_coding
-1.438167401	0.23736235	0.719923354	-1.997667382	0.045752733	64	530	TTN	SHANK2	57	UCEC	0.057889621	0.973246754	0.069092647	protein_coding	protein_coding
-2.293969479	0.100865284	1.009311935	-2.272805265	0.023037918	64	530	ARID1A	SI	57	UCEC	0.013950766	0.72926501	0.069092647	protein_coding	protein_coding
-1.579712883	0.206034246	0.720313678	-2.193090219	0.02830088	64	530	ZFHX4	SLITRK3	57	UCEC	0.050210672	0.845440004	0.069092647	protein_coding	protein_coding
-1.482413705	0.227088901	0.719969372	-2.058995512	0.039494668	64	530	PTEN	SORBS2	57	UCEC	0.055379063	0.931206952	0.069092647	protein_coding	protein_coding
-1.575005134	0.20700649	0.720322373	-2.186528135	0.028776989	64	530	RYR3	SVEP1	57	UCEC	0.050446748	0.849443981	0.069092647	protein_coding	protein_coding
-2.2816935	0.102111135	1.009219804	-2.260848916	0.023768614	64	530	MUC16	SVEP1	57	UCEC	0.014125631	0.738139325	0.069092647	protein_coding	protein_coding
-1.533857519	0.215701986	0.720547743	-2.12873822	0.033275925	64	530	RNF213	SYNE1	57	UCEC	0.052542596	0.885516717	0.069092647	protein_coding	protein_coding
-2.275357956	0.102760118	1.009319012	-2.254349645	0.02417418	64	530	CEP290	SYNE1	57	UCEC	0.014212645	0.742975141	0.069092647	protein_coding	protein_coding
-1.56309812	0.209486052	0.720431719	-2.169668657	0.030031956	64	530	GPR112	SYNE1	57	UCEC	0.051040069	0.85980303	0.069092647	protein_coding	protein_coding
-2.233373974	0.107166243	1.009144582	-2.213135773	0.026888286	64	530	RANBP2	SYNE1	57	UCEC	0.01482712	0.774567404	0.069092647	protein_coding	protein_coding
-2.245389126	0.105886329	1.009129837	-2.225074559	0.026076233	64	530	XIST	SYNE1	57	UCEC	0.014650459	0.765294427	0.069092647	none protein_coding	protein_coding
-2.241875152	0.106259066	1.009207062	-2.221422378	0.026322367	64	530	MUC5B	SYNE2	57	UCEC	0.014699806	0.768104636	0.069092647	protein_coding	protein_coding
-2.251059388	0.105287625	1.009261787	-2.23040188	0.025720775	64	530	FLG	SYNE2	57	UCEC	0.014563855	0.761164117	0.069092647	protein_coding	protein_coding
-2.269532653	0.103360474	1.009327787	-2.248558577	0.024540594	64	530	ZFHX4	SYNE2	57	UCEC	0.014295434	0.747328681	0.069092647	protein_coding	protein_coding
-2.276374802	0.10265568	1.009248452	-2.255514782	0.024101035	64	530	DMD	SYNE2	57	UCEC	0.014200164	0.742117393	0.069092647	protein_coding	protein_coding
-2.285433814	0.101729921	1.009324857	-2.264319359	0.02355448	64	530	HMCN1	SYNE2	57	UCEC	0.014069998	0.735535044	0.069092647	protein_coding	protein_coding
-1.538197705	0.214767828	0.720437051	-2.13508967	0.032753686	64	530	PIK3CA	SZT2	57	UCEC	0.052326396	0.881490472	0.069092647	protein_coding	protein_coding
-1.567819435	0.208499333	0.720250954	-2.176768286	0.02949786	64	530	PTEN	TAF1L	57	UCEC	0.050817662	0.855450058	0.069092647	protein_coding	protein_coding
-2.300792973	0.100179373	1.009209606	-2.279796942	0.022619734	64	530	RYR3	TENM1	57	UCEC	0.013858676	0.724160558	0.069092647	protein_coding	protein_coding
-1.615385372	0.198814038	0.720642278	-2.241591177	0.024987807	64	530	PIK3R1	TENM1	57	UCEC	0.048419908	0.816338234	0.069092647	protein_coding	protein_coding
-1.246468997	0.287518234	0.594501611	-2.096662102	0.036023498	64	530	UBR4	TENM1	57	UCEC	0.089663442	0.921967008	0.069092647	protein_coding	protein_coding
-2.314742538	0.098791616	1.009286506	-2.293444453	0.02182243	64	530	DNAH7	TENM1	57	UCEC	0.013664636	0.714236609	0.069092647	protein_coding	protein_coding
-2.327710789	0.097518733	1.009486765	-2.305835865	0.021119805	64	530	ZFHX4	TG	57	UCEC	0.01348328	0.705310795	0.069092647	protein_coding	protein_coding
-2.177442974	0.113330951	1.00912489	-2.157753708	0.030946986	64	530	PDE4DIP	TNRC6B	57	UCEC	0.015680651	0.819092557	0.069092647	protein_coding	protein_coding
-1.484899259	0.22652516	0.72021962	-2.061731197	0.039233335	64	530	ASH1L	TNRC6B	57	UCEC	0.055214498	0.929350983	0.069092647	protein_coding	protein_coding
-1.527620089	0.217051617	0.720210982	-2.121073029	0.033915657	64	530	OBSCN	TNRC6B	57	UCEC	0.05290626	0.890469378	0.069092647	protein_coding	protein_coding
-1.575882757	0.206824896	0.720336605	-2.187703286	0.028691223	64	530	RYR2	TNRC6B	57	UCEC	0.050401089	0.848722491	0.069092647	protein_coding	protein_coding
-1.551995074	0.211824946	0.720716815	-2.153404835	0.031286876	64	530	ZFHX4	TRRAP	57	UCEC	0.051581096	0.869888604	0.069092647	protein_coding	protein_coding
-1.588202106	0.204292578	0.720350861	-2.204761862	0.02747081	64	530	TTN	TTC3	57	UCEC	0.049782598	0.838354348	0.069092647	protein_coding	protein_coding
-2.27576348	0.102718455	1.008998694	-2.25546722	0.024104018	64	530	FGFR2	TTN	57	UCEC	0.014215805	0.742207787	0.069092647	protein_coding	protein_coding
-2.395253928	0.091149531	1.009443112	-2.372846869	0.01765158	64	530	DNAH8	UBR4	57	UCEC	0.012603731	0.659188709	0.069092647	protein_coding	protein_coding
-2.282487395	0.102030102	1.009162186	-2.261764685	0.023711946	64	530	OBSCN	UBR4	57	UCEC	0.014116015	0.737470265	0.069092647	protein_coding	protein_coding
-1.636709914	0.194619304	0.720645711	-2.27117138	0.023136605	64	530	FAT3	USH2A	57	UCEC	0.047397988	0.799119869	0.069092647	protein_coding	protein_coding
-1.611945965	0.199499018	0.720721858	-2.236571499	0.025314359	64	530	ATRX	USH2A	57	UCEC	0.048579152	0.819278565	0.069092647	protein_coding	protein_coding
-2.330857833	0.097212319	1.009502988	-2.308916231	0.02094823	64	530	HMCN1	USH2A	57	UCEC	0.013440487	0.703116996	0.069092647	protein_coding	protein_coding
-2.246734411	0.105743978	1.009067749	-2.226544663	0.025977721	64	530	NEB	UTRN	57	UCEC	0.014632544	0.764172581	0.069092647	protein_coding	protein_coding
-1.630609885	0.195810116	0.720396914	-2.263488159	0.023605614	64	530	TTN	VCAN	57	UCEC	0.047711261	0.803617449	0.069092647	protein_coding	protein_coding
-1.566712431	0.208730271	0.720231089	-2.175291312	0.029608293	64	530	TTN	VPS13C	57	UCEC	0.050875929	0.856364226	0.069092647	protein_coding	protein_coding
-1.492834237	0.2247348	0.720128005	-2.073012336	0.038171131	64	530	DST	XIST	57	UCEC	0.054787943	0.921840238	0.069092647	protein_coding	none protein_coding
-2.266505698	0.103673815	1.009414611	-2.245366447	0.024744618	64	530	TTN	ZEB2	57	UCEC	0.014336331	0.74972181	0.069092647	protein_coding	protein_coding
-1.582665694	0.205426763	0.720516017	-2.196572535	0.02805099	64	530	FAT3	ZFHX3	57	UCEC	0.050042778	0.843281626	0.069092647	protein_coding	protein_coding
-2.3076826	0.099491546	1.009275958	-2.286473368	0.02222658	64	530	POLE	ZFHX4	57	UCEC	0.013761733	0.719282047	0.069092647	protein_coding	protein_coding
-1.564518594	0.209188694	0.720505366	-2.171418377	0.029899561	64	530	PTEN	ZMYM2	57	UCEC	0.050960263	0.858706514	0.069092647	protein_coding	protein_coding
-2.235898537	0.106896037	1.009430983	-2.215008827	0.026759459	64	530	TTN	ZMYM3	57	UCEC	0.014781435	0.773048252	0.069092647	protein_coding	protein_coding
-2.344356983	0.095908853	1.009301294	-2.32275238	0.020192459	64	530	SYNE1	ZNF292	57	UCEC	0.013265514	0.693415116	0.069092647	protein_coding	protein_coding
-2.320102693	0.098263494	1.009484112	-2.298305308	0.021544419	64	530	FAT4	ZNF292	57	UCEC	0.013586324	0.710693636	0.069092647	protein_coding	protein_coding
-2.350336296	0.095337095	1.009295536	-2.328689875	0.019875501	64	530	KMT2D	ZNF292	57	UCEC	0.013186581	0.689273562	0.069092647	protein_coding	protein_coding
-1.501185817	0.222865725	0.720185551	-2.084443119	0.037119879	63	530	CSMD3	ABCA12	57	UCEC	0.054326155	0.914276592	0.069092647	protein_coding	protein_coding
-1.488794065	0.225644604	0.720142086	-2.067361557	0.038700098	63	530	SYNE1	ABCA12	57	UCEC	0.055008225	0.925597711	0.069092647	protein_coding	protein_coding
-2.312809923	0.098982727	1.009232453	-2.29165235	0.021925712	63	530	USH2A	ABCA13	57	UCEC	0.013692521	0.715542477	0.069092647	protein_coding	protein_coding
-1.585057791	0.204935949	0.720397848	-2.200253369	0.027788924	63	530	KMT2C	ABCA13	57	UCEC	0.049934778	0.841072001	0.069092647	protein_coding	protein_coding
-2.222169071	0.108373783	1.009209428	-2.201890916	0.027673015	63	530	MUC16	AFF2	57	UCEC	0.014992285	0.783394724	0.069092647	protein_coding	protein_coding
-1.526107577	0.217380158	0.720357052	-2.118543259	0.034129085	63	530	ZFHX4	AHNAK	57	UCEC	0.052971174	0.892072604	0.069092647	protein_coding	protein_coding
-2.262533543	0.104086443	1.00935724	-2.241558741	0.024989905	63	530	LRP1B	AHNAK2	57	UCEC	0.014395009	0.752621109	0.069092647	protein_coding	protein_coding
-2.214994862	0.109154075	1.009388071	-2.194393739	0.028207116	63	530	COL6A3	ANK2	57	UCEC	0.015094943	0.789311491	0.069092647	protein_coding	protein_coding
-1.592430619	0.203430548	0.720645652	-2.209727646	0.02712407	63	530	ATRX	ANK2	57	UCEC	0.049543902	0.835299328	0.069092647	protein_coding	protein_coding
-2.221701552	0.108424462	1.009150116	-2.201557049	0.027696613	63	530	TAF1	ANK2	57	UCEC	0.01500104	0.783669954	0.069092647	protein_coding	protein_coding
-1.546860241	0.212915429	0.720701264	-2.146326526	0.031846937	63	530	FAT2	ANK2	57	UCEC	0.051848218	0.874340175	0.069092647	protein_coding	protein_coding
-2.235950341	0.106890499	1.009230565	-2.215500025	0.026725763	63	530	SACS	ANK2	57	UCEC	0.014786477	0.772704613	0.069092647	protein_coding	protein_coding
-1.611484315	0.199591138	0.720491975	-2.236644365	0.025309593	63	530	KMT2C	ANK3	57	UCEC	0.048623487	0.819287643	0.069092647	protein_coding	protein_coding
-2.308048488	0.09945515	1.009562359	-2.286187144	0.022243313	63	530	ARHGAP35	ANK3	57	UCEC	0.013748979	0.71942265	0.069092647	protein_coding	protein_coding
-2.324248325	0.097856973	1.009276457	-2.302885704	0.021285275	63	530	FLG	ANK3	57	UCEC	0.013535625	0.707465461	0.069092647	protein_coding	protein_coding
-2.343593168	0.095982138	1.009592056	-2.321326871	0.020269209	63	530	DNAH2	ANK3	57	UCEC	0.013268087	0.694340546	0.069092647	protein_coding	protein_coding
-1.203742857	0.300068992	0.593719186	-2.02746161	0.042615227	63	530	MDN1	ANK3	57	UCEC	0.09372105	0.960738277	0.069092647	protein_coding	protein_coding
-1.594321149	0.20304632	0.721092043	-2.210981475	0.02703712	63	530	PDE4DIP	ANK3	57	UCEC	0.04940708	0.834451426	0.069092647	protein_coding	protein_coding
-1.578459689	0.206292608	0.720601921	-2.190473883	0.028489887	63	530	PTEN	ANKRD30A	57	UCEC	0.05024524	0.846978539	0.069092647	protein_coding	protein_coding
-2.351393362	0.095236371	1.009390585	-2.329517827	0.01983165	63	530	NEB	APC	57	UCEC	0.013170196	0.688673624	0.069092647	protein_coding	protein_coding
-2.336636883	0.096652145	1.009280491	-2.315151144	0.020604662	63	530	ZFHX4	APC	57	UCEC	0.013368867	0.698760575	0.069092647	protein_coding	protein_coding
-2.202230683	0.110556267	1.009222495	-2.182106219	0.029101694	63	530	DST	APOB	57	UCEC	0.015293815	0.799191575	0.069092647	protein_coding	protein_coding
-1.546656126	0.212958892	0.720628119	-2.146261138	0.03185215	63	530	PTEN	ARHGAP21	57	UCEC	0.051866237	0.874393292	0.069092647	protein_coding	protein_coding
-1.511312524	0.220620218	0.72034545	-2.098038551	0.03590174	63	530	ZFHX4	ARHGAP35	57	UCEC	0.053761934	0.905348395	0.069092647	protein_coding	protein_coding
-1.439495034	0.237047429	0.720624049	-1.997567297	0.045763592	63	530	OBSCN	ARHGAP35	57	UCEC	0.057733472	0.973291262	0.069092647	protein_coding	protein_coding
-1.439799	0.236975386	0.720100054	-1.999442983	0.045560445	63	530	BTBD7	ARID1A	57	UCEC	0.057775232	0.971996676	0.069092647	protein_coding	protein_coding
-1.536326447	0.21517009	0.720290712	-2.132925529	0.032930836	63	530	CHD7	ARID1A	57	UCEC	0.052439443	0.882888242	0.069092647	protein_coding	protein_coding
-1.50231104	0.222615093	0.720334461	-2.085574301	0.037017201	63	530	PCDH9	ARID1A	57	UCEC	0.054249224	0.913514988	0.069092647	protein_coding	protein_coding
-1.532626326	0.21596772	0.720115585	-2.128306008	0.03331172	63	530	BCORL1	ARID1A	57	UCEC	0.052651904	0.885856966	0.069092647	protein_coding	protein_coding
-2.235933671	0.106892281	1.009313281	-2.215301942	0.026739347	63	530	BIRC6	ARID1A	57	UCEC	0.014784326	0.77284278	0.069092647	protein_coding	protein_coding
-2.190738136	0.111834169	1.009291054	-2.17057124	0.029963598	63	530	ARHGAP35	ARID1A	57	UCEC	0.015468515	0.808537945	0.069092647	protein_coding	protein_coding
-2.267339256	0.103587433	1.009105786	-2.246879652	0.024647719	63	530	PTPRD	ARID1A	57	UCEC	0.014333059	0.748643844	0.069092647	protein_coding	protein_coding
-2.294142803	0.100847803	1.009360694	-2.27286719	0.023034185	63	530	BRCA2	ARID1A	57	UCEC	0.013947015	0.729208307	0.069092647	protein_coding	protein_coding
-2.300856918	0.100172967	1.009483398	-2.279241959	0.022652686	63	530	ATRX	ASPM	57	UCEC	0.013850356	0.724502941	0.069092647	protein_coding	protein_coding
-2.314489542	0.098816613	1.009515286	-2.292674092	0.021866775	63	530	PCLO	ASPM	57	UCEC	0.013661966	0.714737754	0.069092647	protein_coding	protein_coding
-2.328783674	0.097414162	1.009465911	-2.306946325	0.021057813	63	530	DNAH8	ASPM	57	UCEC	0.013469373	0.704525686	0.069092647	protein_coding	protein_coding
-1.548501454	0.212566276	0.72042608	-2.149424483	0.031600766	63	530	DMD	ASPM	57	UCEC	0.05179112	0.872435688	0.069092647	protein_coding	protein_coding
-1.548071148	0.212657764	0.720496587	-2.148616907	0.03166478	63	530	RYR2	ASPM	57	UCEC	0.051806251	0.872931809	0.069092647	protein_coding	protein_coding
-2.268386748	0.103478983	1.009417446	-2.247223641	0.024625738	63	530	ZFHX3	ASPM	57	UCEC	0.014309309	0.74831703	0.069092647	protein_coding	protein_coding
-2.267098503	0.103612375	1.009290131	-2.246230726	0.024689233	63	530	NEB	ASPM	57	UCEC	0.014331331	0.749094716	0.069092647	protein_coding	protein_coding
-2.286037951	0.10166848	1.009544825	-2.264424416	0.023548024	63	530	MUC16	ATM	57	UCEC	0.014055439	0.735407808	0.069092647	protein_coding	protein_coding
-2.295631568	0.100697776	1.009321936	-2.274429483	0.022940176	63	530	FLG	ATM	57	UCEC	0.013927325	0.728068185	0.069092647	protein_coding	protein_coding
-2.300577913	0.10020092	1.009520624	-2.278881539	0.022674108	63	530	ZFHX4	ATM	57	UCEC	0.01385321	0.724757987	0.069092647	protein_coding	protein_coding
-2.285780249	0.101694684	1.009539447	-2.264181213	0.023562972	63	530	HUWE1	ATM	57	UCEC	0.01405921	0.735589593	0.069092647	protein_coding	protein_coding
-2.285135785	0.101760244	1.009424348	-2.263800936	0.023586361	63	530	DMD	ATM	57	UCEC	0.014071448	0.735897775	0.069092647	protein_coding	protein_coding
-1.464962394	0.231086681	0.720289881	-2.033851139	0.041966607	63	530	TTN	ATP7A	57	UCEC	0.056318592	0.948195828	0.069092647	protein_coding	protein_coding
-1.59567372	0.202771871	0.720407833	-2.214958871	0.026762888	63	530	SACS	ATRX	57	UCEC	0.04940651	0.832206753	0.069092647	protein_coding	protein_coding
-2.32873508	0.097418896	1.009326073	-2.307217799	0.021042681	63	530	DNAH5	ATRX	57	UCEC	0.01347372	0.704366841	0.069092647	protein_coding	protein_coding
-1.508601686	0.221219096	0.720152537	-2.094836313	0.036185546	63	530	PTEN	BCLAF1	57	UCEC	0.053928259	0.907462793	0.069092647	protein_coding	protein_coding
-2.238390176	0.106630022	1.009258463	-2.217856235	0.026564636	63	530	DST	BCOR	57	UCEC	0.014749638	0.77086379	0.069092647	protein_coding	protein_coding
-2.268022565	0.103516675	1.009268297	-2.247194895	0.024627574	63	530	SYNE1	BIRC6	57	UCEC	0.014318707	0.748370799	0.069092647	protein_coding	protein_coding
-1.524613003	0.217705292	0.720510481	-2.116017801	0.034343294	63	530	PIK3CA	CACNA1D	57	UCEC	0.053034452	0.893675576	0.069092647	protein_coding	protein_coding
-2.304381821	0.099820489	1.009490385	-2.282717949	0.022446988	63	530	ZFHX3	CACNA1D	57	UCEC	0.013801431	0.721963521	0.069092647	protein_coding	protein_coding
-1.53212108	0.216076865	0.720309404	-2.1270319	0.033417433	63	530	CSMD1	CACNA1E	57	UCEC	0.052658505	0.886641412	0.069092647	protein_coding	protein_coding
-1.611349647	0.199618018	0.72042515	-2.236664902	0.02530825	63	530	ANK3	CACNA1E	57	UCEC	0.048636406	0.819290667	0.069092647	protein_coding	protein_coding
-1.601827827	0.201527823	0.720403309	-2.223515365	0.026181069	63	530	ATRX	CACNA1E	57	UCEC	0.049103827	0.827093657	0.069092647	protein_coding	protein_coding
-1.525346035	0.217545765	0.72040684	-2.117339744	0.034231024	63	530	LRP2	CACNA1E	57	UCEC	0.053006356	0.892839337	0.069092647	protein_coding	protein_coding
-2.351289587	0.095246255	1.009295922	-2.329633495	0.01982553	63	530	DNAH8	CACNA1E	57	UCEC	0.013174007	0.688617318	0.069092647	protein_coding	protein_coding
-2.278632834	0.102424142	1.009318842	-2.257594667	0.023970941	63	530	DNAH5	CACNA1E	57	UCEC	0.014166181	0.74054572	0.069092647	protein_coding	protein_coding
-2.296831122	0.100577056	1.00919258	-2.275909641	0.022851418	63	530	MACF1	CACNA1E	57	UCEC	0.013914155	0.727011004	0.069092647	protein_coding	protein_coding
-1.61300684	0.199287487	0.720621095	-2.2383564	0.025197823	63	530	ARID1A	CCDC108	57	UCEC	0.048537228	0.818248259	0.069092647	protein_coding	protein_coding
-2.173865372	0.11373713	1.009002243	-2.154470306	0.031203308	63	530	TTN	CCDC168	57	UCEC	0.015740634	0.821830611	0.069092647	protein_coding	protein_coding
-1.472930404	0.229252697	0.720186168	-2.045207849	0.040834371	63	530	ARID1A	CEP170	57	UCEC	0.055882987	0.940479418	0.069092647	protein_coding	protein_coding
-2.258091521	0.104549826	1.009469213	-2.236909746	0.025292239	63	530	MUC16	CEP350	57	UCEC	0.014455921	0.756137634	0.069092647	protein_coding	protein_coding
-1.538323122	0.214740894	0.720528295	-2.134993355	0.032761553	63	530	KMT2D	CEP350	57	UCEC	0.052310478	0.881537564	0.069092647	protein_coding	protein_coding
-1.457956714	0.232711285	0.720241527	-2.024260833	0.042943321	63	530	ZFHX3	CIT	57	UCEC	0.056719903	0.954771417	0.069092647	protein_coding	protein_coding
-1.512837741	0.220283981	0.720380867	-2.10005264	0.035724211	63	530	MACF1	CLCN5	57	UCEC	0.053676272	0.904031348	0.069092647	protein_coding	protein_coding
-1.472492085	0.229353205	0.720317859	-2.04422543	0.040931282	63	530	ASH1L	CLCN5	57	UCEC	0.055893058	0.941134627	0.069092647	protein_coding	protein_coding
-2.254693283	0.104905715	1.009386535	-2.233726334	0.025501085	63	530	PTEN	CNTNAP2	57	UCEC	0.01450748	0.758588602	0.069092647	protein_coding	protein_coding
-1.558349263	0.210483237	0.720569315	-2.162663925	0.030567038	63	530	PTEN	COL12A1	57	UCEC	0.051269199	0.864128836	0.069092647	protein_coding	protein_coding
-1.584533961	0.205043329	0.720602683	-2.198900999	0.027884963	63	530	ATRX	CSMD1	57	UCEC	0.049940888	0.841850612	0.069092647	protein_coding	protein_coding
-1.580197372	0.205934449	0.720399564	-2.19350129	0.028271282	63	530	DNAH5	CSMD1	57	UCEC	0.050177904	0.845172756	0.069092647	protein_coding	protein_coding
-1.485158465	0.226466451	0.720277161	-2.061926359	0.039214748	63	530	NF1	CSMD3	57	UCEC	0.055193963	0.929214913	0.069092647	protein_coding	protein_coding
-1.459658074	0.232315696	0.72016722	-2.026832151	0.042679581	63	530	KMT2B	CTCF	57	UCEC	0.056631731	0.953009579	0.069092647	protein_coding	protein_coding
-2.161097659	0.115198603	1.009003635	-2.14181355	0.032208489	63	530	PDE4DIP	CTCF	57	UCEC	0.015942851	0.83239305	0.069092647	protein_coding	protein_coding
-1.495049122	0.224237589	0.720075399	-2.076239689	0.037871788	63	530	RYR2	CTCF	57	UCEC	0.054672365	0.919705894	0.069092647	protein_coding	protein_coding
-2.258921219	0.104463117	1.009443054	-2.237789651	0.025234776	63	530	ANK2	DCHS1	57	UCEC	0.014444673	0.755471793	0.069092647	protein_coding	protein_coding
-2.287160201	0.101554447	1.009242527	-2.266214651	0.023438244	63	530	SLITRK3	DMD	57	UCEC	0.014047996	0.734147844	0.069092647	protein_coding	protein_coding
-1.531236146	0.216268163	0.720270642	-2.125917755	0.033510108	63	530	MKI67	DMD	57	UCEC	0.052709129	0.887358961	0.069092647	protein_coding	protein_coding
-2.253725058	0.105007337	1.009276717	-2.233010056	0.025548281	63	530	NBEA	DMD	57	UCEC	0.014524659	0.759160021	0.069092647	protein_coding	protein_coding
-1.498546335	0.223454752	0.720200989	-2.080733515	0.037458305	63	530	ANK2	DMD	57	UCEC	0.054468089	0.916720733	0.069092647	protein_coding	protein_coding
-1.565609898	0.20896053	0.720309724	-2.173523204	0.029740961	63	530	CSMD1	DMD	57	UCEC	0.050924204	0.857441058	0.069092647	protein_coding	protein_coding
-1.47156528	0.229565869	0.720169258	-2.043360311	0.041016783	63	530	MUC16	DMXL1	57	UCEC	0.055961181	0.941732953	0.069092647	protein_coding	protein_coding
-1.231792164	0.291769211	0.594122246	-2.073297493	0.038144602	63	530	CSMD1	DNAH10	57	UCEC	0.091056802	0.934902941	0.069092647	protein_coding	protein_coding
-1.650690812	0.191917284	0.720696876	-2.290409278	0.021997602	63	530	ATRX	DNAH10	57	UCEC	0.046735245	0.788104223	0.069092647	protein_coding	protein_coding
-1.54471231	0.213373248	0.720315657	-2.144493591	0.031993358	63	530	AHNAK	DNAH10	57	UCEC	0.051998989	0.875558227	0.069092647	protein_coding	protein_coding
-1.623245583	0.197257444	0.721099016	-2.251071694	0.024380997	63	530	MACF1	DNAH11	57	UCEC	0.047997822	0.810672189	0.069092647	protein_coding	protein_coding
-2.292001847	0.101063945	1.009495074	-2.270443815	0.023180669	63	530	MUC5B	DNAH11	57	UCEC	0.013973226	0.730963683	0.069092647	protein_coding	protein_coding
-1.628369557	0.196249287	0.72129245	-2.257571886	0.023972363	63	530	PIK3CA	DNAH11	57	UCEC	0.04773441	0.806834789	0.069092647	protein_coding	protein_coding
-2.302447215	0.100013789	1.009204486	-2.281447662	0.02252197	63	530	ZFHX4	DNAH2	57	UCEC	0.013835908	0.722956357	0.069092647	protein_coding	protein_coding
-2.304866046	0.099772165	1.009361367	-2.283489463	0.022401553	63	530	DNAH5	DNAH2	57	UCEC	0.013798239	0.721431558	0.069092647	protein_coding	protein_coding
-2.293247144	0.100938168	1.009196159	-2.272350249	0.023065364	63	530	NEB	DNAH2	57	UCEC	0.013964015	0.729626389	0.069092647	protein_coding	protein_coding
-1.674501419	0.187401591	0.720718144	-2.323379027	0.0201588	63	530	ZFHX3	DNAH3	57	UCEC	0.045633692	0.769592706	0.069092647	protein_coding	protein_coding
-1.637350201	0.194494732	0.720782399	-2.271629001	0.023108928	63	530	PIK3CA	DNAH3	57	UCEC	0.04735496	0.79882235	0.069092647	protein_coding	protein_coding
-1.621001191	0.197700664	0.720461173	-2.24994941	0.024452157	63	530	MUC16	DNAH3	57	UCEC	0.048165846	0.811478577	0.069092647	protein_coding	protein_coding
-1.229645429	0.292396235	0.594772219	-2.067422436	0.038694366	63	530	FAT4	DNAH3	57	UCEC	0.09113631	0.938106422	0.069092647	protein_coding	protein_coding
-2.225517224	0.108011538	1.00920722	-2.205213339	0.027439128	63	530	HUWE1	DNAH7	57	UCEC	0.014942237	0.780772806	0.069092647	protein_coding	protein_coding
-1.557869875	0.210584164	0.72040092	-2.162504006	0.030579349	63	530	USP9X	DNAH7	57	UCEC	0.051310715	0.864257889	0.069092647	protein_coding	protein_coding
-2.235213129	0.106969329	1.009191527	-2.214855229	0.026770003	63	530	ASH1L	DNAH8	57	UCEC	0.014798514	0.773215305	0.069092647	protein_coding	protein_coding
-2.339675859	0.096358867	1.009426351	-2.317827207	0.020458714	63	530	CSMD1	DNAH8	57	UCEC	0.013324491	0.696839469	0.069092647	protein_coding	protein_coding
-2.301507679	0.100107799	1.009253219	-2.280406577	0.022583586	63	530	RYR2	DNAH8	57	UCEC	0.013847591	0.723705043	0.069092647	protein_coding	protein_coding
-2.160458333	0.115272276	1.009147419	-2.140874853	0.032284132	63	530	MUC16	DNAH9	57	UCEC	0.015948551	0.833160156	0.069092647	protein_coding	protein_coding
-2.175739129	0.113524214	1.009029848	-2.156268353	0.031062717	63	530	RYR2	DNHD1	57	UCEC	0.015710317	0.820336525	0.069092647	protein_coding	protein_coding
-2.140262662	0.117623944	1.008977978	-2.12121841	0.033903427	63	530	ARID1A	DNHD1	57	UCEC	0.016279323	0.849875148	0.069092647	protein_coding	protein_coding
-1.506493602	0.221685936	0.720635307	-2.090507623	0.036572224	63	530	ARID1A	DOCK11	57	UCEC	0.053990952	0.910238705	0.069092647	protein_coding	protein_coding
-2.15933671	0.11540164	1.009072952	-2.139921307	0.032361127	63	530	ZFHX3	DOCK3	57	UCEC	0.01596878	0.833973439	0.069092647	protein_coding	protein_coding
-1.500521547	0.223013818	0.720157509	-2.083601891	0.037196395	63	530	TTN	DSP	57	UCEC	0.054365242	0.914833836	0.069092647	protein_coding	protein_coding
-1.628538028	0.196216227	0.720618554	-2.259916871	0.023826411	63	530	MUC17	DST	57	UCEC	0.047789449	0.805634058	0.069092647	protein_coding	protein_coding
-2.25237646	0.105149045	1.009501418	-2.231177115	0.025669399	63	530	FAT2	DYNC2H1	57	UCEC	0.014537856	0.760519382	0.069092647	protein_coding	protein_coding
-2.240236719	0.106433307	1.00920653	-2.219800062	0.026432343	63	530	CSMD3	DYNC2H1	57	UCEC	0.014723926	0.769363354	0.069092647	protein_coding	protein_coding
-2.255247989	0.104847539	1.009244628	-2.234590036	0.025444276	63	530	DNAH5	DYNC2H1	57	UCEC	0.014503468	0.757957079	0.069092647	protein_coding	protein_coding
-2.215973137	0.109047345	1.009242689	-2.195679158	0.028114916	63	530	FLG	DYNC2H1	57	UCEC	0.015084481	0.788315044	0.069092647	protein_coding	protein_coding
-2.218638993	0.108757027	1.009283065	-2.198232656	0.027932531	63	530	ZFHX4	DYNC2H1	57	UCEC	0.015043131	0.78627853	0.069092647	protein_coding	protein_coding
-1.513889241	0.220052474	0.72032027	-2.101689074	0.035580521	63	530	PTEN	EPHA3	57	UCEC	0.05362623	0.902974006	0.069092647	protein_coding	protein_coding
-1.487629654	0.2259075	0.72012285	-2.065799819	0.038847385	63	530	SYNE1	EYS	57	UCEC	0.055074391	0.926641178	0.069092647	protein_coding	protein_coding
-2.195109599	0.111346357	1.009067173	-2.175385006	0.029601277	63	530	UTRN	FAT1	57	UCEC	0.015407802	0.804657998	0.069092647	protein_coding	protein_coding
-1.455731539	0.233229685	0.72021667	-2.021241107	0.043254812	63	530	AHNAK2	FAT1	57	UCEC	0.056849025	0.956851697	0.069092647	protein_coding	protein_coding
-1.531226015	0.216270354	0.720372936	-2.125601807	0.033536429	63	530	LRP2	FAT1	57	UCEC	0.052699096	0.887545883	0.069092647	protein_coding	protein_coding
-1.514102127	0.220005633	0.720347012	-2.101906584	0.03556146	63	530	BIRC6	FAT1	57	UCEC	0.053612005	0.902829116	0.069092647	protein_coding	protein_coding
-2.220930005	0.108508149	1.009232369	-2.200613133	0.027763423	63	530	DNAH9	FAT1	57	UCEC	0.015010198	0.784401273	0.069092647	protein_coding	protein_coding
-2.245323179	0.105893312	1.009318151	-2.224594076	0.026108501	63	530	CEP290	FAT1	57	UCEC	0.014646019	0.765627436	0.069092647	protein_coding	protein_coding
-2.329523721	0.097342098	1.009213985	-2.30825549	0.020984931	63	530	APC	FAT1	57	UCEC	0.013466056	0.703656963	0.069092647	protein_coding	protein_coding
-2.242881285	0.106152209	1.009225939	-2.222377763	0.026257787	63	530	FBN2	FAT1	57	UCEC	0.01468448	0.7673606	0.069092647	protein_coding	protein_coding
-1.503617401	0.222324467	0.720250671	-2.087630682	0.036831162	63	530	ASH1L	FAT2	57	UCEC	0.0541873	0.912172571	0.069092647	protein_coding	protein_coding
-2.260648534	0.104282832	1.009409118	-2.239576098	0.025118456	63	530	PDE4DIP	FBN2	57	UCEC	0.014420703	0.754117821	0.069092647	protein_coding	protein_coding
-2.313111998	0.098952831	1.009477663	-2.291394928	0.021940583	63	530	MACF1	FBN2	57	UCEC	0.013681808	0.715670239	0.069092647	protein_coding	protein_coding
-2.322986559	0.097980524	1.009523361	-2.301072613	0.021387527	63	530	DST	FBN2	57	UCEC	0.013546158	0.708701561	0.069092647	protein_coding	protein_coding
-2.222011112	0.108390903	1.009222794	-2.201705239	0.027686136	63	530	USP9X	FLG	57	UCEC	0.01499426	0.783539004	0.069092647	protein_coding	protein_coding
-1.479273024	0.227803236	0.720024843	-2.054474978	0.039929743	63	530	PTEN	FLNC	57	UCEC	0.055547225	0.934237742	0.069092647	protein_coding	protein_coding
-2.198783758	0.110938004	1.008948871	-2.179281649	0.029310752	63	530	TTN	FLRT2	57	UCEC	0.015354855	0.801521108	0.069092647	protein_coding	protein_coding
-1.511997582	0.220469133	0.720609515	-2.098220398	0.035885681	63	530	PTEN	FNDC1	57	UCEC	0.053697318	0.90519677	0.069092647	protein_coding	protein_coding
-1.497618712	0.22366213	0.720221569	-2.079386089	0.037581878	63	530	TTN	GON4L	57	UCEC	0.054516439	0.917608513	0.069092647	protein_coding	protein_coding
-1.53821063	0.214765052	0.720363284	-2.13532625	0.03273437	63	530	ZFHX4	GPR112	57	UCEC	0.052333286	0.881351642	0.069092647	protein_coding	protein_coding
-2.265091235	0.103820562	1.00921677	-2.24440507	0.024806351	63	530	TTN	GPR179	57	UCEC	0.014362192	0.750491941	0.069092647	protein_coding	protein_coding
-1.54404098	0.21351654	0.720506357	-2.142994252	0.03211356	63	530	OBSCN	GPR98	57	UCEC	0.052014464	0.876473752	0.069092647	protein_coding	protein_coding
-1.586595921	0.204620974	0.72053825	-2.201959328	0.027668182	63	530	FAT4	GPR98	57	UCEC	0.049844312	0.840010447	0.069092647	protein_coding	protein_coding
-2.305007264	0.099758076	1.009431368	-2.283471009	0.022402639	63	530	KMT2C	GPR98	57	UCEC	0.013794398	0.72142866	0.069092647	protein_coding	protein_coding
-1.559235575	0.210296766	0.72030353	-2.164692396	0.03041125	63	530	PCLO	GPR98	57	UCEC	0.05125047	0.862913646	0.069092647	protein_coding	protein_coding
-1.555830423	0.211014079	0.720301763	-2.159970312	0.030774968	63	530	HMCN1	GPR98	57	UCEC	0.051425461	0.865854007	0.069092647	protein_coding	protein_coding
-2.239496913	0.106512076	1.009208565	-2.219062532	0.026482471	63	530	CSMD3	GPR98	57	UCEC	0.014734764	0.769935814	0.069092647	protein_coding	protein_coding
-1.474896904	0.228802314	0.720542125	-2.046926686	0.040665283	63	530	PTEN	GRM8	57	UCEC	0.055734303	0.939286872	0.069092647	protein_coding	protein_coding
-2.260674995	0.104280072	1.00922655	-2.240007454	0.025090439	63	530	DNAH8	HERC2	57	UCEC	0.014425482	0.753828073	0.069092647	protein_coding	protein_coding
-2.20218157	0.110561697	1.009186758	-2.182134826	0.029099584	63	530	RYR3	HERC2	57	UCEC	0.015295638	0.799174847	0.069092647	protein_coding	protein_coding
-2.26809721	0.103508949	1.009255859	-2.24729655	0.024621081	63	530	PCLO	HERC2	57	UCEC	0.014317987	0.748296697	0.069092647	protein_coding	protein_coding
-2.27974746	0.102310041	1.009441129	-2.258425374	0.023919152	63	530	GPR98	HERC2	57	UCEC	0.014147009	0.73989807	0.069092647	protein_coding	protein_coding
-2.254914351	0.104882526	1.009455354	-2.233793047	0.025496693	63	530	ATM	HERC2	57	UCEC	0.014502317	0.758523228	0.069092647	protein_coding	protein_coding
-1.595087448	0.202890785	0.720588956	-2.21358853	0.026857097	63	530	DNAH2	HERC2	57	UCEC	0.049417938	0.832990456	0.069092647	protein_coding	protein_coding
-1.530082665	0.216517768	0.720190915	-2.124551467	0.033624057	63	530	LRP1B	HERC2	57	UCEC	0.05277821	0.888244291	0.069092647	protein_coding	protein_coding
-2.274790416	0.102818455	1.009270546	-2.253895573	0.024202738	63	530	DNAH5	HERC2	57	UCEC	0.014222064	0.743326315	0.069092647	protein_coding	protein_coding
-2.223916096	0.108184617	1.009295549	-2.203433967	0.027564176	63	530	SYNE2	HERC2	57	UCEC	0.01496359	0.782159324	0.069092647	protein_coding	protein_coding
-1.558816041	0.210385011	0.720308553	-2.164094864	0.03045707	63	530	CSMD1	HMCN1	57	UCEC	0.051271471	0.863284243	0.069092647	protein_coding	protein_coding
-2.245042784	0.105923008	1.009242842	-2.224482246	0.026116016	63	530	KMT2C	HMCN1	57	UCEC	0.014652288	0.76572911	0.069092647	protein_coding	protein_coding
-1.544579257	0.21340164	0.720554392	-2.14359842	0.032065077	63	530	LRP1B	HMCN1	57	UCEC	0.051981579	0.876084573	0.069092647	protein_coding	protein_coding
-1.44187256	0.236484512	0.719978299	-2.002661139	0.045213673	63	530	TTN	HSPG2	57	UCEC	0.057669316	0.969751822	0.069092647	protein_coding	protein_coding
-2.196713369	0.111167927	1.009266791	-2.176543793	0.029514623	63	530	LRP2	HUWE1	57	UCEC	0.015377094	0.803682926	0.069092647	protein_coding	protein_coding
-1.461778355	0.231823643	0.720292388	-2.029423579	0.042415166	63	530	DNAH9	HUWE1	57	UCEC	0.056497921	0.951224406	0.069092647	protein_coding	protein_coding
-1.45776546	0.232755796	0.720565489	-2.023085317	0.043064352	63	530	AHNAK2	HUWE1	57	UCEC	0.056694741	0.955560593	0.069092647	protein_coding	protein_coding
-1.520046243	0.218701773	0.720307422	-2.110274302	0.034834736	63	530	POLE	HUWE1	57	UCEC	0.053298409	0.897408876	0.069092647	protein_coding	protein_coding
-2.198250276	0.110997203	1.009272274	-2.178054754	0.029401961	63	530	CSMD3	HUWE1	57	UCEC	0.015353314	0.802457313	0.069092647	protein_coding	protein_coding
-2.295520714	0.100708939	1.009352936	-2.274249802	0.022950971	63	530	NRK	HUWE1	57	UCEC	0.013928022	0.728193143	0.069092647	protein_coding	protein_coding
-2.205890479	0.110152393	1.00924544	-2.185682879	0.028838814	63	530	ASH1L	HUWE1	57	UCEC	0.01523726	0.796307854	0.069092647	protein_coding	protein_coding
-2.224323328	0.10814057	1.009219813	-2.204002834	0.027524145	63	530	PCDH15	HUWE1	57	UCEC	0.014959718	0.781724819	0.069092647	protein_coding	protein_coding
-1.553329582	0.211542452	0.720287852	-2.156540023	0.031041522	63	530	SYNE1	IGF2R	57	UCEC	0.051555635	0.867998415	0.069092647	protein_coding	protein_coding
-2.271043364	0.103204444	1.009265636	-2.250193887	0.02443664	63	530	ZFHX4	IGF2R	57	UCEC	0.014275593	0.746109641	0.069092647	protein_coding	protein_coding
-1.438389521	0.237309633	0.719970743	-1.997844404	0.045733532	63	530	TTN	IQSEC2	57	UCEC	0.057871388	0.973120983	0.069092647	protein_coding	protein_coding
-1.421754596	0.241290278	0.719997918	-1.974664871	0.048306192	63	530	PTEN	JMJD1C	57	UCEC	0.058838992	0.989496871	0.069092647	protein_coding	protein_coding
-2.255772262	0.104792585	1.009456689	-2.234639968	0.025440995	63	530	PTEN	KIAA0947	57	UCEC	0.014489843	0.757874744	0.069092647	protein_coding	protein_coding
-2.24078759	0.106374692	1.009198345	-2.220363918	0.026394074	63	530	SYNE2	KIAA2022	57	UCEC	0.014716053	0.768927313	0.069092647	protein_coding	protein_coding
-1.490652852	0.225225569	0.720172178	-2.069856206	0.038465812	63	530	OBSCN	KIAA2022	57	UCEC	0.054902833	0.923933312	0.069092647	protein_coding	protein_coding
-1.467529145	0.2304943	0.720226176	-2.037594847	0.041590468	63	530	KMT2C	KMT2B	57	UCEC	0.056181236	0.945647085	0.069092647	protein_coding	protein_coding
-2.204022288	0.110358371	1.009087507	-2.184173596	0.028949494	63	530	DNAH14	KMT2C	57	UCEC	0.015270479	0.79754998	0.069092647	protein_coding	protein_coding
-2.299541735	0.100304799	1.009319718	-2.278308543	0.022708201	63	530	DNAH5	KMT2C	57	UCEC	0.013873033	0.725223723	0.069092647	protein_coding	protein_coding
-1.531573902	0.216195129	0.72020071	-2.126593158	0.033453902	63	530	COL6A3	KMT2C	57	UCEC	0.052698552	0.886937723	0.069092647	protein_coding	protein_coding
-1.47511825	0.228751676	0.720135436	-2.048390033	0.040521797	63	530	SZT2	KMT2D	57	UCEC	0.055766402	0.938330736	0.069092647	protein_coding	protein_coding
-1.568968578	0.208259875	0.720352164	-2.1780577	0.029401741	63	530	KMT2A	KMT2D	57	UCEC	0.050749231	0.854637107	0.069092647	protein_coding	protein_coding
-2.290508061	0.101215025	1.009494397	-2.268965601	0.023270418	63	530	NRK	KMT2D	57	UCEC	0.013994133	0.73205543	0.069092647	protein_coding	protein_coding
-1.557103811	0.210745547	0.720636546	-2.160733894	0.030715901	63	530	NFASC	KMT2D	57	UCEC	0.051326328	0.865319756	0.069092647	protein_coding	protein_coding
-1.560889521	0.209949234	0.720252427	-2.167142327	0.030224003	63	530	DST	LAMA1	57	UCEC	0.0511709	0.861401329	0.069092647	protein_coding	protein_coding
-1.585845037	0.204774678	0.720644486	-2.200592757	0.027764867	63	530	PTEN	LAMA3	57	UCEC	0.049871368	0.840816493	0.069092647	protein_coding	protein_coding
-1.475879881	0.228577518	0.720353349	-2.048827679	0.040478968	63	530	DST	LRP2	57	UCEC	0.05570015	0.938016897	0.069092647	protein_coding	protein_coding
-2.252028609	0.105185628	1.00922005	-2.231454487	0.025651039	63	530	MKI67	MACF1	57	UCEC	0.014550937	0.760364534	0.069092647	protein_coding	protein_coding
-1.569868336	0.208072576	0.720595424	-2.178571058	0.029363548	63	530	CSMD1	MACF1	57	UCEC	0.05067942	0.854275699	0.069092647	protein_coding	protein_coding
-2.240129765	0.106444691	1.009460986	-2.219134563	0.026477571	63	530	CEP290	MACF1	57	UCEC	0.014718158	0.769829489	0.069092647	protein_coding	protein_coding
-1.576447864	0.206708051	0.720545954	-2.18785194	0.028680389	63	530	SACS	MACF1	57	UCEC	0.05035195	0.848591134	0.069092647	protein_coding	protein_coding
-2.290029265	0.101263498	1.009158625	-2.269246091	0.023253365	63	530	NEB	MDN1	57	UCEC	0.014010053	0.731924172	0.069092647	protein_coding	protein_coding
-2.266373957	0.103687475	1.009184323	-2.24574828	0.024720136	63	530	ZFHX4	MED12	57	UCEC	0.014344693	0.74948222	0.069092647	protein_coding	protein_coding
-2.240174459	0.106439933	1.009110302	-2.219950044	0.026422159	63	530	KMT2D	MED12	57	UCEC	0.01472762	0.769266152	0.069092647	protein_coding	protein_coding
-1.611537292	0.199580565	0.720564309	-2.23649336	0.025319472	63	530	KMT2D	MED13L	57	UCEC	0.048614019	0.819360397	0.069092647	protein_coding	protein_coding
-2.241998494	0.10624596	1.009185487	-2.221592089	0.026310885	63	530	ZFHX4	MGAM	57	UCEC	0.014698614	0.767977426	0.069092647	protein_coding	protein_coding
-1.538026219	0.214804661	0.720369514	-2.13505179	0.03275678	63	530	PCLO	MKI67	57	UCEC	0.052342299	0.881524951	0.069092647	protein_coding	protein_coding
-1.572901224	0.207442471	0.720584648	-2.182812567	0.029049616	63	530	DNAH5	MKI67	57	UCEC	0.050527015	0.851670712	0.069092647	protein_coding	protein_coding
-2.278490112	0.102438761	1.009255017	-2.257596023	0.023970857	63	530	ATRX	MKI67	57	UCEC	0.014169976	0.740558773	0.069092647	protein_coding	protein_coding
-1.516636749	0.219448708	0.720304036	-2.105550813	0.035243389	63	530	KMT2C	MKI67	57	UCEC	0.053480795	0.900467831	0.069092647	protein_coding	protein_coding
-1.536737036	0.215081762	0.72026369	-2.133575602	0.032877537	63	530	FLG	MKI67	57	UCEC	0.052420693	0.882479073	0.069092647	protein_coding	protein_coding
-2.243016133	0.106137895	1.009334416	-2.222272517	0.026264894	63	530	DNAH5	MUC5B	57	UCEC	0.014679379	0.767420277	0.069092647	protein_coding	protein_coding
-2.192041332	0.111688522	1.009089397	-2.172296467	0.029833308	63	530	DOCK3	MUC5B	57	UCEC	0.015454477	0.807165853	0.069092647	protein_coding	protein_coding
-2.195693028	0.111281414	1.009210626	-2.175653892	0.02958115	63	530	TAF1	MUC5B	57	UCEC	0.015394486	0.804414818	0.069092647	protein_coding	protein_coding
-2.278745593	0.102412593	1.009479902	-2.257346172	0.023986452	63	530	CEP290	MUC5B	57	UCEC	0.014160113	0.740696007	0.069092647	protein_coding	protein_coding
-1.621791694	0.197544443	0.720578265	-2.25068084	0.024405759	63	530	UBR4	MUC5B	57	UCEC	0.048116742	0.811023462	0.069092647	protein_coding	protein_coding
-1.461731872	0.231834419	0.720586582	-2.028530517	0.042506132	63	530	AHNAK2	MUC5B	57	UCEC	0.056467977	0.951817303	0.069092647	protein_coding	protein_coding
-2.310761939	0.099185649	1.009774572	-2.288393869	0.022114594	63	530	ATRX	MUC5B	57	UCEC	0.01370602	0.717771663	0.069092647	protein_coding	protein_coding
-1.54114297	0.21413621	0.720312632	-2.139547333	0.032391367	63	530	MACF1	NAV2	57	UCEC	0.052185232	0.878683766	0.069092647	protein_coding	protein_coding
-2.297586665	0.100501094	1.009302063	-2.276411343	0.022821401	63	530	ATRX	NBEA	57	UCEC	0.013900663	0.72661783	0.069092647	protein_coding	protein_coding
-2.338202799	0.096500914	1.009455328	-2.316301409	0.020541817	63	530	DNAH5	NBEA	57	UCEC	0.013343375	0.697906349	0.069092647	protein_coding	protein_coding
-1.521055793	0.218481094	0.72017923	-2.112051737	0.034682012	63	530	PTEN	NCOR1	57	UCEC	0.053258009	0.896278129	0.069092647	protein_coding	protein_coding
-1.556108346	0.210955441	0.720260304	-2.160480505	0.030735491	63	530	POLE	NEB	57	UCEC	0.051415349	0.865543064	0.069092647	protein_coding	protein_coding
-1.525820198	0.217442638	0.720310072	-2.118282469	0.034151152	63	530	LRRK2	NEB	57	UCEC	0.052991278	0.892246841	0.069092647	protein_coding	protein_coding
-2.309866617	0.099274492	1.009509101	-2.288108759	0.022131188	63	530	CEP290	NEB	57	UCEC	0.013725437	0.718040878	0.069092647	protein_coding	protein_coding
-1.53888564	0.214620132	0.720617858	-2.135508609	0.032719488	63	530	OBSCN	NIPBL	57	UCEC	0.052271884	0.881196498	0.069092647	protein_coding	protein_coding
-1.476670578	0.228396853	0.720019779	-2.050875021	0.040279119	63	530	SYNE1	NPAP1	57	UCEC	0.055692525	0.936662914	0.069092647	protein_coding	protein_coding
-1.455275597	0.233336048	0.719984488	-2.021259655	0.043252893	63	530	ASH1L	NSD1	57	UCEC	0.056900839	0.956852524	0.069092647	protein_coding	protein_coding
-1.539148535	0.214563717	0.720147504	-2.137268445	0.032576164	63	530	TTN	NUP210L	57	UCEC	0.052306343	0.880153084	0.069092647	protein_coding	protein_coding
-2.267203405	0.103601507	1.00936938	-2.246158295	0.02469387	63	530	MUC16	PCDH11X	57	UCEC	0.014327602	0.749132491	0.069092647	protein_coding	protein_coding
-2.278537239	0.102433934	1.00923868	-2.257679262	0.023965663	63	530	POLE	PCDH15	57	UCEC	0.014169762	0.740500163	0.069092647	protein_coding	protein_coding
-2.192128533	0.111678783	1.009216985	-2.172108245	0.029847499	63	530	OBSCN	PCDH15	57	UCEC	0.015449265	0.807297327	0.069092647	protein_coding	protein_coding
-2.297409368	0.100518914	1.009231546	-2.276394725	0.022822395	63	530	FAT4	PCDH15	57	UCEC	0.01390505	0.726646229	0.069092647	protein_coding	protein_coding
-2.230770529	0.107445608	1.009179761	-2.210478861	0.027071946	63	530	NEB	PCDH15	57	UCEC	0.014864747	0.776640124	0.069092647	protein_coding	protein_coding
-2.212235149	0.109455725	1.009068108	-2.192354641	0.028353909	63	530	TENM1	PCDH19	57	UCEC	0.015146154	0.790996562	0.069092647	protein_coding	protein_coding
-2.259558976	0.104396516	1.009169794	-2.239027555	0.025154123	63	530	ATRX	PCDH19	57	UCEC	0.014443197	0.754585882	0.069092647	protein_coding	protein_coding
-2.276331759	0.102660099	1.00923031	-2.255512677	0.024101167	63	530	SACS	PCLO	57	UCEC	0.01420128	0.742122949	0.069092647	protein_coding	protein_coding
-1.579019441	0.206177168	0.720682609	-2.191005334	0.028451406	63	530	TTN	PDS5B	57	UCEC	0.050209182	0.846638457	0.069092647	protein_coding	protein_coding
-1.539648954	0.214456372	0.720526797	-2.13683788	0.03261118	63	530	ZFHX3	PKD1L2	57	UCEC	0.052241323	0.880366984	0.069092647	protein_coding	none protein_coding
-1.578283338	0.206328992	0.720701683	-2.189925979	0.028529606	63	530	TTN	PLCE1	57	UCEC	0.050244277	0.847293574	0.069092647	protein_coding	protein_coding
-2.267142099	0.103607858	1.009312253	-2.246224686	0.02468962	63	530	DST	PLXNA4	57	UCEC	0.014330085	0.749094539	0.069092647	protein_coding	protein_coding
-1.552230714	0.211775037	0.720350205	-2.154827892	0.031175305	63	530	RYR3	POLE	57	UCEC	0.051606011	0.869058957	0.069092647	protein_coding	protein_coding
-1.597752077	0.202350876	0.720397438	-2.217875847	0.026563299	63	530	DNAH5	POLE	57	UCEC	0.049304937	0.830462006	0.069092647	protein_coding	protein_coding
-1.523192259	0.218014815	0.720184924	-2.11500159	0.034429812	63	530	OBSCN	POLE	57	UCEC	0.053143753	0.894375286	0.069092647	protein_coding	protein_coding
-2.236789953	0.10680079	1.009145656	-2.216518438	0.026656017	63	530	PTEN	PPP1R3A	57	UCEC	0.014776526	0.771927638	0.069092647	protein_coding	protein_coding
-1.531440851	0.216223896	0.720254986	-2.126248176	0.033482601	63	530	DST	REV3L	57	UCEC	0.052699958	0.88715011	0.069092647	protein_coding	protein_coding
-1.518163017	0.219114026	0.720039211	-2.108444919	0.034992522	63	530	TTN	RIMS1	57	UCEC	0.053426956	0.898627965	0.069092647	protein_coding	protein_coding
-1.558434879	0.210465217	0.720501493	-2.162986327	0.030542231	63	530	DST	RNF213	57	UCEC	0.051271625	0.863940004	0.069092647	protein_coding	protein_coding
-1.504262944	0.222180993	0.720164072	-2.088778104	0.036727702	63	530	MUC16	RNF213	57	UCEC	0.054161523	0.911429199	0.069092647	protein_coding	protein_coding
-1.554649012	0.211263521	0.720194568	-2.158651399	0.030877222	63	530	MUC16	ROBO1	57	UCEC	0.05149707	0.866695427	0.069092647	protein_coding	protein_coding
-1.557207657	0.210723663	0.720362109	-2.161701231	0.030641213	63	530	CSMD3	RYR1	57	UCEC	0.051348611	0.86476462	0.069092647	protein_coding	protein_coding
-2.312439092	0.099019439	1.009220144	-2.291312858	0.021945325	63	530	PCLO	RYR1	57	UCEC	0.01369793	0.715790602	0.069092647	protein_coding	protein_coding
-2.377122227	0.092817301	1.009300749	-2.355216945	0.018511894	63	530	DNAH8	RYR1	57	UCEC	0.012837924	0.671062663	0.069092647	protein_coding	protein_coding
-1.180072661	0.307256412	0.594100382	-1.986318637	0.046997954	63	530	FAT3	RYR2	57	UCEC	0.095894235	0.984485694	0.069092647	protein_coding	protein_coding
-1.493950817	0.224484006	0.720229794	-2.074269671	0.038054273	63	530	TTN	SLITRK1	57	UCEC	0.054715885	0.92099523	0.069092647	protein_coding	protein_coding
-1.559629523	0.210213936	0.720606502	-2.164328963	0.030439111	63	530	MUC16	SMG1	57	UCEC	0.051199871	0.863086139	0.069092647	protein_coding	protein_coding
-1.4772373	0.228267452	0.720618355	-2.049957916	0.040368538	63	530	TTN	SOX6	57	UCEC	0.055595708	0.937231159	0.069092647	protein_coding	protein_coding
-1.502465804	0.222580643	0.720867307	-2.084247392	0.03713767	63	530	PTEN	SPEF2	57	UCEC	0.054184211	0.914328025	0.069092647	protein_coding	protein_coding
-1.529527525	0.216637999	0.720235851	-2.12364814	0.033699577	63	530	MUC16	SPTA1	57	UCEC	0.052802867	0.888815806	0.069092647	protein_coding	protein_coding
-1.438392461	0.237308936	0.719999862	-1.99776769	0.045741852	63	530	RYR2	SSPO	57	UCEC	0.057867915	0.973173662	0.069092647	protein_coding	none protein_coding
-1.480156159	0.227602143	0.720199843	-2.055202002	0.039859498	63	530	TAF1	SYNE1	57	UCEC	0.055479158	0.933733263	0.069092647	protein_coding	protein_coding
-1.611511358	0.19958574	0.720680186	-2.236097771	0.025345367	63	530	MUC17	SYNE1	57	UCEC	0.048604239	0.819567765	0.069092647	protein_coding	protein_coding
-2.206966935	0.110033883	1.00923199	-2.186778617	0.028758689	63	530	PCDH15	SYNE1	57	UCEC	0.015221268	0.795430155	0.069092647	protein_coding	protein_coding
-2.28704222	0.101566429	1.009289159	-2.265993051	0.023451809	63	530	RYR1	SYNE2	57	UCEC	0.014048369	0.734301575	0.069092647	protein_coding	protein_coding
-2.321562735	0.09812013	1.009295179	-2.300182131	0.021437904	63	530	DNAH8	SYNE2	57	UCEC	0.013571527	0.709394007	0.069092647	protein_coding	protein_coding
-2.262642108	0.104075143	1.009300319	-2.241792721	0.024974772	63	530	SACS	SYNE2	57	UCEC	0.014395052	0.752455453	0.069092647	protein_coding	protein_coding
-1.502552207	0.222561412	0.720193053	-2.086318662	0.036949767	63	530	FLG	SZT2	57	UCEC	0.054251177	0.913041612	0.069092647	protein_coding	protein_coding
-1.464826606	0.231118063	0.72015286	-2.034049555	0.041946599	63	530	OBSCN	SZT2	57	UCEC	0.056341369	0.948069944	0.069092647	protein_coding	protein_coding
-2.250345346	0.105362832	1.00909991	-2.230052074	0.025743986	63	530	KMT2C	TAF1	57	UCEC	0.014578883	0.761466178	0.069092647	protein_coding	protein_coding
-2.272003834	0.103105367	1.009179218	-2.251338309	0.024364118	63	530	USP9X	TAF1	57	UCEC	0.014264304	0.745267126	0.069092647	protein_coding	protein_coding
-2.20430795	0.110326851	1.009162994	-2.184293284	0.028940704	63	530	DNAH5	TAF1	57	UCEC	0.015263859	0.79744016	0.069092647	protein_coding	protein_coding
-1.512996559	0.220248999	0.720285272	-2.100551847	0.035680325	63	530	HERC2	TENM1	57	UCEC	0.053677804	0.903718442	0.069092647	protein_coding	protein_coding
-2.253175086	0.105065104	1.009210541	-2.232611526	0.025574573	63	530	SACS	TENM1	57	UCEC	0.014534535	0.759479138	0.069092647	protein_coding	protein_coding
-2.288089704	0.101460096	1.009276452	-2.267059437	0.023386595	63	530	POLE	TENM1	57	UCEC	0.014034011	0.73351454	0.069092647	protein_coding	protein_coding
-2.237403239	0.106735311	1.009276639	-2.216838431	0.026634134	63	530	USP9X	TENM1	57	UCEC	0.014763676	0.771652448	0.069092647	protein_coding	protein_coding
-2.318127464	0.098457779	1.009280335	-2.296812276	0.021629481	63	530	ANK3	TENM1	57	UCEC	0.013618625	0.711814449	0.069092647	protein_coding	protein_coding
-1.559346777	0.210273382	0.720550951	-2.164103418	0.030456413	63	530	COL6A3	TENM1	57	UCEC	0.051219926	0.863236215	0.069092647	protein_coding	protein_coding
-2.242220357	0.106222391	1.009511195	-2.221095089	0.026344522	63	530	ATM	TENM1	57	UCEC	0.014685975	0.768297374	0.069092647	protein_coding	protein_coding
-2.28138714	0.102142423	1.009326585	-2.260306203	0.023802253	63	530	NBEA	TENM1	57	UCEC	0.014127002	0.738520045	0.069092647	protein_coding	protein_coding
-2.335218042	0.096789376	1.009326936	-2.31363888	0.020687539	63	530	ZNF292	TENM1	57	UCEC	0.01338663	0.699816412	0.069092647	protein_coding	protein_coding
-2.227106418	0.107840023	1.009087486	-2.207049882	0.027310575	63	530	EYS	TENM1	57	UCEC	0.014922011	0.779350074	0.069092647	protein_coding	protein_coding
-2.251969795	0.105191814	1.009214519	-2.231408439	0.025654086	63	530	ABCA12	TENM1	57	UCEC	0.01455195	0.760401012	0.069092647	protein_coding	protein_coding
-1.52662613	0.217267464	0.720592279	-2.118571313	0.034126712	63	530	PIK3CA	TG	57	UCEC	0.052919309	0.892021303	0.069092647	protein_coding	protein_coding
-2.226374968	0.107918931	1.009438573	-2.205557651	0.027414987	63	530	DST	TG	57	UCEC	0.014922658	0.78045721	0.069092647	protein_coding	protein_coding
-1.424081789	0.240729402	0.719977767	-1.977952451	0.047934071	63	530	TTN	TNRC6A	57	UCEC	0.05870454	0.987157809	0.069092647	protein_coding	protein_coding
-1.585639525	0.204816766	0.720261981	-2.201476084	0.027702338	63	530	CACNA1E	TNRC6B	57	UCEC	0.049919029	0.840359046	0.069092647	protein_coding	protein_coding
-1.543487446	0.213634761	0.720680616	-2.141708007	0.032216986	63	530	TENM1	TNRC6B	57	UCEC	0.052025492	0.87725862	0.069092647	protein_coding	protein_coding
-2.305011221	0.099757681	1.009422503	-2.283494983	0.022401228	63	530	TTN	TPTE	57	UCEC	0.013794583	0.721413271	0.069092647	protein_coding	protein_coding
-2.174071545	0.113713683	1.009069379	-2.154531283	0.031198531	63	530	TTN	TRIP12	57	UCEC	0.015735318	0.821769316	0.069092647	protein_coding	protein_coding
-2.120007278	0.120030755	1.009154473	-2.100775781	0.035660653	63	530	MACF1	TRPS1	57	UCEC	0.016606683	0.867565288	0.069092647	protein_coding	protein_coding
-2.283703036	0.101906145	1.009149522	-2.262997689	0.023635832	63	530	ZFHX4	TSHZ3	57	UCEC	0.014099216	0.736556028	0.069092647	protein_coding	protein_coding
-1.507280874	0.221511477	0.719992037	-2.093468813	0.036307325	63	530	MUC16	TSHZ3	57	UCEC	0.054016525	0.90837637	0.069092647	protein_coding	protein_coding
-1.66571233	0.18905594	0.720679549	-2.311307894	0.020815854	63	530	MUC16	UBR4	57	UCEC	0.046040021	0.776327808	0.069092647	protein_coding	protein_coding
-2.34872523	0.095490813	1.009272609	-2.327146511	0.019957469	63	530	FLG	UBR4	57	UCEC	0.013208436	0.690353898	0.069092647	protein_coding	protein_coding
-2.169995785	0.114178098	1.009016485	-2.150604889	0.031507399	63	530	PTEN	UNC80	57	UCEC	0.015801221	0.825039946	0.069092647	protein_coding	protein_coding
-2.312299933	0.09903322	1.00949878	-2.290542573	0.021989884	63	530	AHNAK	USH2A	57	UCEC	0.013692356	0.716281291	0.069092647	protein_coding	protein_coding
-1.535685562	0.215308034	0.720316721	-2.131958787	0.033010235	63	530	FLG	USH2A	57	UCEC	0.052470387	0.883499291	0.069092647	protein_coding	protein_coding
-1.542025406	0.213947332	0.720718785	-2.139565996	0.032389857	63	530	FAT2	USH2A	57	UCEC	0.052097713	0.878607873	0.069092647	protein_coding	protein_coding
-1.489854011	0.22540556	0.720105518	-2.068938474	0.038551861	63	530	PCLO	UTRN	57	UCEC	0.054953889	0.924550879	0.069092647	protein_coding	protein_coding
-1.587785721	0.20437766	0.720639107	-2.203302186	0.027573457	63	530	PIK3CA	XIRP2	57	UCEC	0.049775202	0.839177469	0.069092647	protein_coding	protein_coding
-2.318899839	0.098381762	1.009525195	-2.297020273	0.021617613	63	530	DST	XIRP2	57	UCEC	0.013601581	0.71160631	0.069092647	protein_coding	protein_coding
-2.152637966	0.116177281	1.009033909	-2.133365338	0.032894768	63	530	DNAH14	ZFHX3	57	UCEC	0.01607734	0.839514522	0.069092647	protein_coding	protein_coding
-1.682274204	0.185950605	0.721043066	-2.333111963	0.01964227	63	530	MUC17	ZFHX3	57	UCEC	0.045251538	0.764120489	0.069092647	protein_coding	protein_coding
-2.32902963	0.097390206	1.009480001	-2.307157772	0.021046026	63	530	HTT	ZFHX3	57	UCEC	0.013465688	0.704371877	0.069092647	protein_coding	protein_coding
-2.276670876	0.102625291	1.009255809	-2.255791698	0.02408368	63	530	CEP290	ZFHX3	57	UCEC	0.014195756	0.741908403	0.069092647	protein_coding	protein_coding
-2.270767834	0.103232884	1.009326342	-2.249785566	0.024462561	63	530	CEP290	ZFHX4	57	UCEC	0.014277828	0.746404049	0.069092647	protein_coding	protein_coding
-2.205507382	0.1101946	1.009300061	-2.185185028	0.028875283	63	530	DNAH9	ZFHX4	57	UCEC	0.015241467	0.796698263	0.069092647	protein_coding	protein_coding
-2.177036937	0.113376976	1.009182992	-2.157227138	0.030987971	63	530	FCGBP	ZFHX4	57	UCEC	0.015685233	0.819518527	0.069092647	protein_coding	protein_coding
-2.329621482	0.097332582	1.009549201	-2.30758588	0.021022181	63	530	RYR2	ZNF292	57	UCEC	0.013455896	0.704050602	0.069092647	protein_coding	protein_coding
-2.301332524	0.100125335	1.0092841	-2.280163261	0.022598007	63	530	ABCA13	ZNF292	57	UCEC	0.013849179	0.723875626	0.069092647	protein_coding	protein_coding
-2.296096113	0.100651008	1.00921697	-2.275126341	0.022898352	63	530	DNAH8	ZNF292	57	UCEC	0.013923721	0.727580341	0.069092647	protein_coding	protein_coding
-2.313184254	0.098945681	1.009258767	-2.291963498	0.02190775	63	530	DNAH10	ZNF292	57	UCEC	0.01368669	0.715311569	0.069092647	protein_coding	protein_coding
-1.562902284	0.209527081	0.720630457	-2.168798543	0.030097982	63	530	CSMD3	ZNF292	57	UCEC	0.051030184	0.860306473	0.069092647	protein_coding	protein_coding
-2.205912951	0.110149918	1.009149437	-2.185913077	0.028821965	62	530	ZFHX4	ABCA12	57	UCEC	0.015239785	0.796140139	0.069092647	protein_coding	protein_coding
-1.506482184	0.221688467	0.720214677	-2.091712696	0.036464224	62	530	HMCN1	ABCA12	57	UCEC	0.054036099	0.909498967	0.069092647	protein_coding	protein_coding
-2.249272855	0.105475893	1.00931157	-2.228521817	0.025845738	62	530	MUC17	ABCA13	57	UCEC	0.014588474	0.762599584	0.069092647	protein_coding	protein_coding
-2.313900568	0.09887483	1.009429455	-2.292285565	0.02188917	62	530	ATM	ABCA13	57	UCEC	0.013672315	0.715038539	0.069092647	protein_coding	protein_coding
-2.323540855	0.097926228	1.009324022	-2.302076246	0.021330873	62	530	ZFHX3	ABCA13	57	UCEC	0.013543942	0.708032153	0.069092647	protein_coding	protein_coding
-2.325671095	0.097717844	1.00946384	-2.30386766	0.021230074	62	530	MUC5B	ABCA13	57	UCEC	0.013511417	0.706719126	0.069092647	protein_coding	protein_coding
-1.559353724	0.210271921	0.720312292	-2.164830091	0.030400699	62	530	PCDH15	ABCA13	57	UCEC	0.051243535	0.862826516	0.069092647	protein_coding	protein_coding
-2.280320516	0.102251428	1.009264466	-2.259388489	0.02385923	62	530	GPR98	ABCA13	57	UCEC	0.014143801	0.739218181	0.069092647	protein_coding	protein_coding
-1.540282943	0.214320452	0.720455933	-2.137928042	0.032522584	62	530	CSMD3	ABCA13	57	UCEC	0.052215465	0.879686827	0.069092647	protein_coding	protein_coding
-1.499284215	0.223289931	0.720198115	-2.081766369	0.037363815	62	530	FLG	AHNAK2	57	UCEC	0.054428219	0.916039393	0.069092647	protein_coding	protein_coding
-2.279271088	0.10235879	1.009467673	-2.257894085	0.023952263	62	530	DNAH10	ANK2	57	UCEC	0.014153013	0.740289133	0.069092647	protein_coding	protein_coding
-1.52306332	0.218042928	0.720299548	-2.114486014	0.034473778	62	530	KMT2C	ANK2	57	UCEC	0.053138666	0.894691596	0.069092647	protein_coding	protein_coding
-1.49105563	0.225134871	0.720285228	-2.070090532	0.038443867	62	530	AHNAK	ANK2	57	UCEC	0.054868565	0.92376591	0.069092647	protein_coding	protein_coding
-1.487373363	0.225965406	0.720298449	-2.064940395	0.03892864	62	530	MKI67	ANK2	57	UCEC	0.055069551	0.927197759	0.069092647	protein_coding	protein_coding
-2.290796425	0.101185843	1.009317166	-2.269649721	0.023228844	62	530	NBEA	ANK3	57	UCEC	0.013994959	0.731590184	0.069092647	protein_coding	protein_coding
-1.597198845	0.202462854	0.720617803	-2.2164299	0.026662074	62	530	LRP1B	ANK3	57	UCEC	0.049310919	0.831280537	0.069092647	protein_coding	protein_coding
-1.611005081	0.199686812	0.720733086	-2.2352312	0.025402174	62	530	SACS	ANK3	57	UCEC	0.048623811	0.820067822	0.069092647	protein_coding	protein_coding
-2.388892058	0.091731261	1.009696204	-2.365951311	0.017983809	62	530	ANK3	APC	57	UCEC	0.012677879	0.663724917	0.069092647	protein_coding	protein_coding
-2.317993143	0.098471005	1.00938169	-2.296448574	0.021650246	62	530	ATRX	APC	57	UCEC	0.013617749	0.712051506	0.069092647	protein_coding	protein_coding
-1.491311873	0.225077189	0.720323533	-2.070336182	0.038420874	62	530	TTN	ARHGAP21	57	UCEC	0.054850389	0.923598571	0.069092647	protein_coding	protein_coding
-1.534186106	0.215631121	0.720541087	-2.129213912	0.033236566	62	530	NEB	ARHGAP35	57	UCEC	0.052526019	0.885214247	0.069092647	protein_coding	protein_coding
-2.196687411	0.111170812	1.009506993	-2.176000192	0.029555246	62	530	PTEN	ARHGAP5	57	UCEC	0.015370255	0.804082258	0.069092647	protein_coding	protein_coding
-1.544424064	0.213434761	0.720604316	-2.143234547	0.03209427	62	530	PCDH11X	ARID1A	57	UCEC	0.05198456	0.876306288	0.069092647	protein_coding	protein_coding
-1.523120691	0.218030419	0.720388363	-2.114304964	0.034489229	62	530	CACNA1C	ARID1A	57	UCEC	0.053126369	0.894796017	0.069092647	protein_coding	protein_coding
-2.187902231	0.112151771	1.009175721	-2.168009183	0.030157988	62	530	SIPA1L2	ARID1A	57	UCEC	0.015515952	0.810650865	0.069092647	protein_coding	protein_coding
-2.334187788	0.096889145	1.009696741	-2.311771141	0.020790299	62	530	HTT	ARID1A	57	UCEC	0.013390719	0.701045719	0.069092647	protein_coding	protein_coding
-2.258621344	0.104494447	1.009054287	-2.238354638	0.025197938	62	530	FGFR2	ARID1A	57	UCEC	0.014460019	0.755122764	0.069092647	protein_coding	protein_coding
-2.279753051	0.102309469	1.009482528	-2.258338294	0.023924577	62	530	DNAH17	ARID1A	57	UCEC	0.014145782	0.739953971	0.069092647	protein_coding	protein_coding
-2.177311092	0.113345898	1.00904459	-2.157794724	0.030943795	62	530	NPAP1	ARID1A	57	UCEC	0.015685187	0.819071665	0.069092647	protein_coding	protein_coding
-1.427581342	0.239888429	0.720254778	-1.982050499	0.047473589	62	530	SPEG	ARID1A	57	UCEC	0.058467706	0.984243476	0.069092647	protein_coding	protein_coding
-1.531630377	0.21618292	0.720490538	-2.125816088	0.033518576	62	530	DMXL1	ARID1A	57	UCEC	0.05266565	0.887391586	0.069092647	protein_coding	protein_coding
-2.341987011	0.096136424	1.009438956	-2.320087804	0.020336128	62	530	APC	ARID1A	57	UCEC	0.013293403	0.695248004	0.069092647	protein_coding	protein_coding
-2.169181025	0.114271164	1.009385961	-2.149010496	0.031633568	62	530	DSCAM	ARID1A	57	UCEC	0.015802652	0.826310605	0.069092647	protein_coding	protein_coding
-2.296548562	0.100605479	1.009290492	-2.275408893	0.022881412	62	530	POLE	ARID1A	57	UCEC	0.013915417	0.727356029	0.069092647	protein_coding	protein_coding
-1.468116896	0.230358867	0.720583409	-2.037400359	0.041609938	62	530	PIK3CA	ARID4B	57	UCEC	0.056108926	0.945753405	0.069092647	protein_coding	protein_coding
-1.524027372	0.217832824	0.720553453	-2.115078854	0.034423227	62	530	ARID1A	ARID5B	57	UCEC	0.05306105	0.894274411	0.069092647	protein_coding	protein_coding
-2.190237326	0.111890191	1.009244489	-2.170175166	0.029993579	62	530	MKI67	ASH1L	57	UCEC	0.015477676	0.808869142	0.069092647	protein_coding	protein_coding
-1.464060679	0.23129515	0.720295045	-2.032584687	0.0420945	62	530	AHNAK	ASH1L	57	UCEC	0.056368828	0.949060823	0.069092647	protein_coding	protein_coding
-1.511160158	0.220653836	0.720342843	-2.097834626	0.035919757	62	530	SACS	ASH1L	57	UCEC	0.053770401	0.905481723	0.069092647	protein_coding	protein_coding
-2.269879555	0.103324624	1.009291995	-2.248982025	0.02451364	62	530	FLG	ASPM	57	UCEC	0.014291478	0.747017068	0.069092647	protein_coding	protein_coding
-2.226681465	0.10788586	1.009229452	-2.206318357	0.027361717	62	530	PCDH15	ASPM	57	UCEC	0.0149242	0.779898309	0.069092647	protein_coding	protein_coding
-2.279515248	0.102333801	1.009333868	-2.258435311	0.023918533	62	530	RYR1	ASPM	57	UCEC	0.014153269	0.739914332	0.069092647	protein_coding	protein_coding
-1.541949106	0.213963657	0.720478835	-2.140172661	0.032340816	62	530	FAT4	ASPM	57	UCEC	0.052126198	0.878261768	0.069092647	protein_coding	protein_coding
-2.221196069	0.108479282	1.009294068	-2.200742222	0.027754278	62	530	CSMD3	ATM	57	UCEC	0.01500439	0.784287438	0.069092647	protein_coding	protein_coding
-2.278455608	0.102442296	1.009372437	-2.257299213	0.023989385	62	530	DNAH5	ATM	57	UCEC	0.014167204	0.740754786	0.069092647	protein_coding	protein_coding
-2.29837215	0.100422183	1.009526329	-2.276683712	0.02280512	62	530	FAT4	ATM	57	UCEC	0.013883645	0.726366519	0.069092647	protein_coding	protein_coding
-2.328441729	0.097447478	1.009578652	-2.306350005	0.021091083	62	530	DNAH10	ATM	57	UCEC	0.013471002	0.704922387	0.069092647	protein_coding	protein_coding
-2.312407611	0.099022557	1.009948001	-2.289630365	0.022042753	62	530	PDE4DIP	ATM	57	UCEC	0.013678833	0.716835045	0.069092647	protein_coding	protein_coding
-2.255839099	0.104785581	1.009976059	-2.233557002	0.025512236	62	530	MUC5B	ATM	57	UCEC	0.014474133	0.758595924	0.069092647	protein_coding	protein_coding
-2.331195639	0.097179486	1.009875223	-2.308399677	0.020976917	62	530	ATRX	ATM	57	UCEC	0.013426149	0.703392514	0.069092647	protein_coding	protein_coding
-2.343692443	0.09597261	1.009558822	-2.321501623	0.020259787	62	530	HMCN1	ATM	57	UCEC	0.013267634	0.694226396	0.069092647	protein_coding	protein_coding
-2.184687208	0.112512921	1.009235409	-2.164695362	0.030411023	62	530	PTEN	ATP7A	57	UCEC	0.015564095	0.813356467	0.069092647	protein_coding	protein_coding
-1.468233157	0.230332087	0.720526087	-2.037723802	0.041577562	62	530	PTEN	ATR	57	UCEC	0.056108706	0.945537219	0.069092647	protein_coding	protein_coding
-2.269440127	0.103370038	1.009451127	-2.248192176	0.024563938	62	530	RYR3	ATRX	57	UCEC	0.014293301	0.747578534	0.069092647	protein_coding	protein_coding
-2.295414639	0.100719622	1.009208703	-2.274469723	0.02293776	62	530	FLG	ATRX	57	UCEC	0.013933438	0.72806454	0.069092647	protein_coding	protein_coding
-2.175125564	0.113593889	1.009045734	-2.155626343	0.031112854	62	530	TTN	BAGE2	57	UCEC	0.01571947	0.820865566	0.069092647	protein_coding	none protein_coding
-1.494001928	0.224472533	0.720271763	-2.074219767	0.038058905	62	530	SYNE1	BAZ2B	57	UCEC	0.054708588	0.921023918	0.069092647	protein_coding	protein_coding
-2.282997343	0.101978085	1.009194096	-2.262198474	0.023685144	62	530	FLG	BIRC6	57	UCEC	0.014107936	0.737140391	0.069092647	protein_coding	protein_coding
-2.22288546	0.108296173	1.009193395	-2.202635759	0.027620431	62	530	MUC16	BIRC6	57	UCEC	0.014982019	0.782809111	0.069092647	protein_coding	protein_coding
-2.198885327	0.110926736	1.009233438	-2.178767809	0.029348921	62	530	ASH1L	BIRC6	57	UCEC	0.015344735	0.801886832	0.069092647	protein_coding	protein_coding
-2.167995041	0.114406768	1.009181808	-2.148270038	0.03169231	62	530	OBSCN	BIRC6	57	UCEC	0.015827737	0.826960211	0.069092647	protein_coding	protein_coding
-2.274757985	0.10282179	1.009321924	-2.253748712	0.024211981	62	530	MUC16	BRCA2	57	UCEC	0.014221094	0.743425281	0.069092647	protein_coding	protein_coding
-1.558277969	0.210498244	0.721080309	-2.161032479	0.030692831	62	530	ARID1A	BRWD3	57	UCEC	0.051221528	0.865056408	0.069092647	protein_coding	protein_coding
-2.231762318	0.107339098	1.009229496	-2.211352648	0.027011426	62	530	PCLO	CACNA1C	57	UCEC	0.014848564	0.775945878	0.069092647	protein_coding	protein_coding
-2.2222705	0.108362792	1.009162132	-2.202094619	0.027658625	62	530	ASH1L	CACNA1E	57	UCEC	0.014992154	0.783242659	0.069092647	protein_coding	protein_coding
-2.24956573	0.105445006	1.009075869	-2.2293326	0.025791783	62	530	NPAP1	CACNA1E	57	UCEC	0.014590941	0.762024153	0.069092647	protein_coding	protein_coding
-2.270390645	0.10327183	1.009234623	-2.249616286	0.024473314	62	530	MKI67	CACNA1E	57	UCEC	0.014285782	0.74655142	0.069092647	protein_coding	protein_coding
-2.274038753	0.102895769	1.009326541	-2.253025815	0.024257521	62	530	CSMD3	CACNA1E	57	UCEC	0.014231197	0.743966902	0.069092647	protein_coding	protein_coding
-2.283924504	0.101883579	1.009195502	-2.263114034	0.023628661	62	530	FLG	CACNA1E	57	UCEC	0.014094823	0.73645929	0.069092647	protein_coding	protein_coding
-1.484812655	0.226544779	0.720297731	-2.061387384	0.039266097	62	530	SYNE1	CEP170	57	UCEC	0.055210827	0.929573777	0.069092647	protein_coding	protein_coding
[truncated: 12,441 more rows]
