# Supplementary material for: Comprehensive Analysis of Co-Mutations Identifies Cooperating Mechanisms of Tumorigenesis
Source: Cancers (Basel). 2022 Jan 14;14(2):415. doi: 10.3390/cancers14020415 (PMC8774165; doi:10.3390/cancers14020415)
Supplement: Supplementary file 1 [file cancers-14-00415-s001.zip › Supplementary Table S5.csv]

a10	a11	gene1	gene2	project
13	0	LRP1B	APC	READ
13	0	APC	FBXW7	READ
13	0	FAT4	APC	READ
13	0	RYR2	APC	READ
13	0	TP53	FBXW7	READ
13	0	TP53	LRP1B	READ
13	0	PIK3CA	APC	READ
13	0	TP53	RYR2	READ
13	0	TTN	LRP1B	READ
13	0	TP53	NEB	READ
13	0	NBEA	APC	READ
13	0	DNAH5	APC	READ
13	0	TP53	DNAH5	READ
13	0	TTN	FBXW7	READ
57	0	MUC16	KIAA2022	UCEC
57	0	ZFHX4	KIAA2022	UCEC
57	0	TTN	AHCTF1	UCEC
57	0	HUWE1	KIAA2022	UCEC
57	0	CSMD3	KIAA2022	UCEC
57	0	MUC16	CACNA1D	UCEC
57	0	TENM1	KIAA2022	UCEC
57	0	CACNA1D	TENM1	UCEC
57	0	CACNA1D	ARID1A	UCEC
57	0	MUC5B	KIAA2022	UCEC
57	0	DNAH5	KIAA2022	UCEC
57	0	CACNA1D	MUC5B	UCEC
57	0	PTEN	AHCTF1	UCEC
57	0	CACNA1D	FAT1	UCEC
57	0	CACNA1D	HERC2	UCEC
57	0	CACNA1D	MACF1	UCEC
57	0	CACNA1D	SYNE1	UCEC
57	0	PCDH15	VPS13B	UCEC
57	0	ITPR2	ARID1A	UCEC
57	0	PDE4DIP	CACNA1D	UCEC
57	0	NBEA	KIAA2022	UCEC
57	0	KIAA1109	KIAA2022	UCEC
57	0	NEB	KIAA2022	UCEC
57	0	DST	AHCTF1	UCEC
57	0	CACNA1D	ANK2	UCEC
57	0	CACNA1D	ANK3	UCEC
57	0	NRK	CACNA1D	UCEC
57	0	ASH1L	CACNA1D	UCEC
57	0	KMT2C	CACNA1D	UCEC
57	0	LRP1B	CACNA1D	UCEC
57	0	RYR2	CACNA1D	UCEC
57	0	MACF1	CHD3	UCEC
57	0	PDE4DIP	KIAA2022	UCEC
57	0	PCDH19	KIAA2022	UCEC
57	0	CACNA1D	SYNE2	UCEC
57	0	PTEN	ACSL4	UCEC
57	0	VPS13B	ARID1A	UCEC
57	0	ZFHX4	CACNA1D	UCEC
57	0	USP9X	CACNA1D	UCEC
57	0	TTN	EPG5	UCEC
57	0	VPS13B	FAT1	UCEC
57	0	RYR1	KIAA2022	UCEC
57	0	DMD	KIAA2022	UCEC
57	0	HMCN1	KIAA2022	UCEC
57	0	POLE	KIAA2022	UCEC
57	0	GPR98	KIAA2022	UCEC
57	0	NPAP1	KIAA2022	UCEC
57	0	ZNF292	KIAA2022	UCEC
57	0	VPS13B	TENM1	UCEC
57	0	MUC16	VPS13B	UCEC
57	0	VPS13B	ASPM	UCEC
57	0	PTEN	ATAD5	UCEC
57	0	TTN	ATAD5	UCEC
57	0	VPS13B	DNAH11	UCEC
57	0	CACNA1D	DNAH2	UCEC
57	0	PTEN	EPG5	UCEC
57	0	SYNE1	GOLGB1	UCEC
57	0	DNAH8	KIAA2022	UCEC
57	0	NAV3	KIAA2022	UCEC
57	0	FLG	KIAA2022	UCEC
57	0	CACNA1D	RYR1	UCEC
57	0	VPS13B	SYNE2	UCEC
57	0	KMT2D	AHCTF1	UCEC
57	0	BTAF1	ARID1A	UCEC
57	0	ZFHX4	BTAF1	UCEC
57	0	TTN	DCAF8L1	UCEC
57	0	CACNA1D	DNAH11	UCEC
57	0	TTN	DOPEY2	UCEC
57	0	ATRX	GOLGB1	UCEC
57	0	ANK2	ITPR2	UCEC
57	0	PCDH15	KIAA2022	UCEC
57	0	DYNC2H1	KIAA2022	UCEC
57	0	DNAH9	KIAA2022	UCEC
57	0	PCDH9	KIAA2022	UCEC
57	0	DMD	KRAS	UCEC
57	0	PTEN	MUM1L1	UCEC
57	0	TTN	PHF3	UCEC
57	0	PTEN	TRO	UCEC
57	0	MACF1	VPS13B	UCEC
57	0	ASH1L	VPS13B	UCEC
57	0	ATRX	VPS13B	UCEC
57	0	VPS13B	ABCA13	UCEC
57	0	CSMD3	AHCTF1	UCEC
57	0	CACNA1D	ASPM	UCEC
57	0	VPS13B	ATM	UCEC
57	0	TTN	BDP1	UCEC
57	0	SYNE1	BTAF1	UCEC
57	0	CEP290	CACNA1D	UCEC
57	0	ATRX	CACNA1D	UCEC
57	0	VPS13B	CACNA1E	UCEC
57	0	MUC16	CHD3	UCEC
57	0	CACNA1D	DNAH8	UCEC
57	0	ZFHX3	DOCK7	UCEC
57	0	PTEN	DOPEY2	UCEC
57	0	FAT1	GOLGB1	UCEC
57	0	SYNE1	ITPR2	UCEC
57	0	RYR2	ITPR2	UCEC
57	0	ZFHX4	ITPR2	UCEC
57	0	LRBA	KIAA2022	UCEC
57	0	CEP290	KIAA2022	UCEC
57	0	VPS13A	KIAA2022	UCEC
57	0	CACNA1D	KIAA2022	UCEC
57	0	DNAH14	KIAA2022	UCEC
57	0	ASPM	KIAA2022	UCEC
57	0	MUC17	KIAA2022	UCEC
57	0	ATM	KIAA2022	UCEC
57	0	TTN	TRO	UCEC
57	0	APC	VPS13B	UCEC
57	0	CSMD3	VPS13B	UCEC
57	0	PTEN	ABCA8	UCEC
57	0	ANK3	AHCTF1	UCEC
57	0	MUC5B	AHCTF1	UCEC
57	0	NEB	AHCTF1	UCEC
57	0	HUWE1	AHCTF1	UCEC
57	0	MACF1	AHCTF1	UCEC
57	0	CACNA1D	ATM	UCEC
57	0	PDE4DIP	BTAF1	UCEC
57	0	MUC16	BTAF1	UCEC
57	0	PCDH15	CACNA1D	UCEC
57	0	DNAH3	CHD3	UCEC
57	0	FAT1	CHD3	UCEC
57	0	PIK3R1	CHD3	UCEC
57	0	PTEN	COL14A1	UCEC
57	0	MUC16	DENND4C	UCEC
57	0	VPS13B	DNAH7	UCEC
57	0	POLE	DOCK7	UCEC
57	0	CACNA1D	DYNC2H1	UCEC
57	0	AHCTF1	FAT1	UCEC
57	0	ITPR2	FAT1	UCEC
57	0	ASH1L	GOLGB1	UCEC
57	0	SACS	GOLGB1	UCEC
57	0	CSMD3	GOLGB1	UCEC
57	0	ZFHX4	GOLGB1	UCEC
57	0	KMT2C	GOLGB1	UCEC
57	0	VPS13B	HERC2	UCEC
57	0	MUC16	ITPR2	UCEC
57	0	CSMD3	ITPR2	UCEC
57	0	ABCA12	KIAA2022	UCEC
57	0	TAF1	KIAA2022	UCEC
57	0	BIRC6	KIAA2022	UCEC
57	0	BCL11A	KIAA2022	UCEC
57	0	RGPD3	KIAA2022	UCEC
57	0	NEB	KRAS	UCEC
57	0	CACNA1D	MED12L	UCEC
57	0	PTEN	PRTG	UCEC
57	0	AHCTF1	TENM1	UCEC
57	0	DOCK7	TENM1	UCEC
57	0	BTAF1	TENM1	UCEC
57	0	ARID1A	TET1	UCEC
57	0	CACNA1D	TNRC6B	UCEC
57	0	CACNA1D	USH2A	UCEC
57	0	LRP1B	VPS13B	UCEC
57	0	AHNAK	VPS13B	UCEC
57	0	CACNA1D	XIRP2	UCEC
57	0	TTN	ABCA8	UCEC
57	0	MUC16	AHCTF1	UCEC
57	0	PTEN	ANO4	UCEC
57	0	PTEN	BDP1	UCEC
57	0	ANK2	BTAF1	UCEC
57	0	SACS	CACNA1D	UCEC
57	0	SCN2A	CACNA1D	UCEC
57	0	GPR112	CACNA1D	UCEC
57	0	APOB	CACNA1D	UCEC
57	0	CACNA1D	CACNA1E	UCEC
57	0	ASH1L	CHD3	UCEC
57	0	KIAA2022	CMYA5	UCEC
57	0	PTEN	CR1	UCEC
57	0	DST	DCAF8L1	UCEC
57	0	ZFHX4	DENND4C	UCEC
57	0	SACS	DOCK7	UCEC
57	0	ITPR2	DYNC2H1	UCEC
57	0	SYNE1	EPG5	UCEC
57	0	PTEN	FAM186A	UCEC
57	0	KRAS	FAT1	UCEC
57	0	KIAA2022	FN1	UCEC
57	0	DNAH7	GOLGB1	UCEC
57	0	RYR2	GOLGB1	UCEC
57	0	ARID1A	GOLGB1	UCEC
57	0	SYNE2	GOLGB1	UCEC
57	0	MUC16	GOLGB1	UCEC
57	0	PTEN	GUCY2F	UCEC
57	0	SYNE1	KDM5A	UCEC
57	0	MGA	KIAA2022	UCEC
57	0	MGAM	KIAA2022	UCEC
57	0	LRRK2	KIAA2022	UCEC
57	0	SZT2	KIAA2022	UCEC
57	0	FSIP2	KIAA2022	UCEC
57	0	UBR4	KIAA2022	UCEC
57	0	PLXNA4	KIAA2022	UCEC
57	0	APC	KIAA2022	UCEC
57	0	CHD5	KIAA2022	UCEC
57	0	MED12	KIAA2022	UCEC
57	0	GOLGB1	KIAA2022	UCEC
57	0	KMT2A	KIAA2022	UCEC
57	0	RANBP2	KIAA2022	UCEC
57	0	GPR112	KIAA2022	UCEC
57	0	NRK	KIAA2022	UCEC
57	0	UNC13C	KIAA2022	UCEC
57	0	AHNAK2	KIAA2022	UCEC
57	0	CEP350	KIAA2022	UCEC
57	0	VPS13C	KIAA2022	UCEC
57	0	MED13L	KIAA2022	UCEC
57	0	MYCBP2	KIAA2022	UCEC
57	0	CACNA1D	KMT2B	UCEC
57	0	HUWE1	KRAS	UCEC
57	0	CACNA1D	MAP1B	UCEC
57	0	CACNA1D	MED13L	UCEC
57	0	CACNA1D	MGAM	UCEC
57	0	ZFHX3	MUM1L1	UCEC
57	0	TTN	N4BP2L2	UCEC
57	0	VPS13B	NSD1	UCEC
57	0	CACNA1D	PCDH19	UCEC
57	0	VPS13B	PCDH9	UCEC
57	0	CACNA1D	PCDH9	UCEC
57	0	TTN	RSBN1	UCEC
57	0	CACNA1D	SLITRK3	UCEC
57	0	ITPR2	SYNE2	UCEC
57	0	CACNA1D	TAF1	UCEC
57	0	CACNA1D	UTRN	UCEC
57	0	SACS	VPS13B	UCEC
57	0	DNAH3	VPS13B	UCEC
57	0	MYCBP2	VPS13B	UCEC
57	0	USP9X	VPS13B	UCEC
57	0	ANK3	VPS13B	UCEC
57	0	VPS13B	XIRP2	UCEC
57	0	PTEN	ZNF711	UCEC
41	0	LRP1B	MUC19	LUSC-KR
44	0	PTEN	PCDHB13	UCEC-US
44	0	PCDHB13	PCDHGB1	UCEC-US
34	0	KMT2C	MUC16	LICA-CN
34	0	TTN	TTN-AS1	LICA-CN
21	0	SF3B1	GNAQ	UVM
