# Supplementary material for: Comprehensive Analysis of Co-Mutations Identifies Cooperating Mechanisms of Tumorigenesis
Source: Cancers (Basel). 2022 Jan 14;14(2):415. doi: 10.3390/cancers14020415 (PMC8774165; doi:10.3390/cancers14020415)
Supplement: Supplementary file 1 [file cancers-14-00415-s001.zip › Supplementary Table S6.csv]

Chromosome	Location	Mutation	genes	Region	Project	motif	Strand	motif_Gene	Types	Freq	number	Frequency
10	53806500	C>A	PCDH15	UTR3	UCEC	AAAAAA	-	PPIE	Gain	1	530	0.00188679245283019
10	53806500	C>A	PCDH15	UTR3	UCEC	AAAAAAA	-	ELAVL4,PCBP1,SYNCRIP,HNRNPU,FMR1,RBM5,IGHMBP2,PABPC4,FUS,HNRNPD,SART3,HNRNPK,PABPC1,DAZAP1,HNRNPA1,LmjF354130,PABPC4,PABPC4	Gain	1	530	0.00188679245283019
10	53806500	C>A	PCDH15	UTR3	UCEC	AAAAAT	-	PPIE	Gain	1	530	0.00188679245283019
10	53806500	G>T	PCDH15	UTR3	UCEC	ACATTTT	+	LmjF180180	Gain	1	530	0.00188679245283019
10	53806500	C>A	PCDH15	UTR3	UCEC	AGAAAAA	-	PABPC1,SART3,PABPC1,SART3,Tbg97295210,TVAG002940	Gain	1	530	0.00188679245283019
10	53806500	C>A	PCDH15	UTR3	UCEC	AGAAAAC	-	SART3,PABPC1	Loss	1	530	0.00188679245283019
10	53806500	G>T	PCDH15	UTR3	UCEC	ATTTTT	+	PPIE	Gain	1	530	0.00188679245283019
10	53806500	G>T	PCDH15	UTR3	UCEC	ATTTTTT	+	HNRNPCL1,HNRNPC,TIA1,PTBP1,BOLL,HNRNPC,HNRNPCL1,Smp067420,HNRNPC,HNRNPCL1	Gain	1	530	0.00188679245283019
10	53806500	G>T	PCDH15	UTR3	UCEC	ATTTTTTTC	+	TIAL1	Gain	1	530	0.00188679245283019
10	53806500	G>T	PCDH15	UTR3	UCEC	CATTTTT	+	CPEB2,HNRNPC,RALYL	Gain	1	530	0.00188679245283019
10	53806500	C>A	PCDH15	UTR3	UCEC	GAAAAC	-	KHDRBS1	Loss	1	530	0.00188679245283019
10	53806500	C>A	PCDH15	UTR3	UCEC	GAAAACA	-	PABPC3,IGF2BP2	Loss	1	530	0.00188679245283019
10	53806500	G>T	PCDH15	UTR3	UCEC	GTTTTC	+	TIAL1,TIA1,ELAVL2	Loss	1	530	0.00188679245283019
10	53806500	G>T	PCDH15	UTR3	UCEC	TTGTTTT	+	ELAVL1	Loss	1	530	0.00188679245283019
10	53806500	G>T	PCDH15	UTR3	UCEC	TTTTTC	+	HNRNPC	Gain	1	530	0.00188679245283019
10	53806500	G>T	PCDH15	UTR3	UCEC	TTTTTCT	+	TIA1,PTBP1	Gain	1	530	0.00188679245283019
10	53806500	G>T	PCDH15	UTR3	UCEC	TTTTTT	+	KHDRBS1,HNRNPC,DDX19B,EIF4A3,PPIE,CPEB4	Gain	1	530	0.00188679245283019
10	53806500	G>T	PCDH15	UTR3	UCEC	TTTTTTC	+	RALY,U2AF2,TIA1,TIA1,U2AF2,U2af50,U2AF2	Gain	1	530	0.00188679245283019
10	53806500	G>T	PCDH15	UTR3	UCEC	TTTTTTT	+	DAZAP1,TIA1,ELAVL1,ELAVL4,PCBP1,U2AF2,HNRNPCL1,HNRNPA1,HNRNPC,FUS,NOVA1,SFPQ,NOVA2,KHDRBS2,PCBP2,RALY,KHDRBS1,FMR1,ELAVL3,KHDRBS3,HNRNPU,DDX19B,HNRNPK,SYNCRIP,PTBP1,egw103003671,ELAVL1,gw184451,HNRNPC,HNRNPCL1,PUF60,Sxl,TVAG514790	Gain	1	530	0.00188679245283019
10	53806523	G>A	PCDH15	UTR3	UCEC	ACTTTT	-	ZFP36	Gain	1	530	0.00188679245283019
10	53806523	G>A	PCDH15	UTR3	UCEC	ACTTTTT	-	PTBP1,RBM15B	Gain	1	530	0.00188679245283019
10	53806523	C>T	PCDH15	UTR3	UCEC	AGTACAG	+	ENOX1	Gain	1	530	0.00188679245283019
10	53806523	G>A	PCDH15	UTR3	UCEC	GTGCTT	-	MBNL1	Loss	1	530	0.00188679245283019
10	53806568	->T	PCDH15	UTR3	UCEC	AAAAGA	-	PABPN1	Loss	1	530	0.00188679245283019
10	53806568	->A	PCDH15	UTR3	UCEC	ATAAAA	+	KHDRBS3,PPIE,KHDRBS1	Gain	1	530	0.00188679245283019
10	53806568	->A	PCDH15	UTR3	UCEC	ATAAAAA	+	KHDRBS1	Gain	1	530	0.00188679245283019
10	53806568	->T	PCDH15	UTR3	UCEC	ATAAAG	-	KHDRBS3	Gain	1	530	0.00188679245283019
10	53806568	->A	PCDH15	UTR3	UCEC	CTTTTA	+	ELAVL2,TIAL1,TIA1	Loss	1	530	0.00188679245283019
10	53806568	->A	PCDH15	UTR3	UCEC	TATAAA	+	PPIE	Gain	1	530	0.00188679245283019
10	53806568	->T	PCDH15	UTR3	UCEC	TATAAA	-	PPIE	Gain	1	530	0.00188679245283019
10	53806568	->A	PCDH15	UTR3	UCEC	TCTTTT	+	ZFP36	Loss	1	530	0.00188679245283019
10	53806568	->A	PCDH15	UTR3	UCEC	TTAAAA	+	KHDRBS1,PPIE	Loss	1	530	0.00188679245283019
10	53806568	->T	PCDH15	UTR3	UCEC	TTAAAA	-	KHDRBS1,PPIE	Loss	1	530	0.00188679245283019
10	53806568	->A	PCDH15	UTR3	UCEC	TTATAA	+	PPIE	Gain	1	530	0.00188679245283019
10	53806568	->T	PCDH15	UTR3	UCEC	TTATAA	-	PPIE	Gain	1	530	0.00188679245283019
10	53806568	->A	PCDH15	UTR3	UCEC	TTATAAA	+	KHDRBS2,RBMS2	Gain	1	530	0.00188679245283019
10	53806568	->T	PCDH15	UTR3	UCEC	TTATAAA	-	KHDRBS2,RBMS2	Gain	1	530	0.00188679245283019
10	53806568	->A	PCDH15	UTR3	UCEC	TTTAAA	+	PPIE	Loss	1	530	0.00188679245283019
10	53806568	->T	PCDH15	UTR3	UCEC	TTTAAA	-	PPIE	Loss	1	530	0.00188679245283019
10	53806568	->A	PCDH15	UTR3	UCEC	TTTATA	+	PPIE,HNRNPA2B1,HNRNPA1	Gain	1	530	0.00188679245283019
10	53806568	->T	PCDH15	UTR3	UCEC	TTTATA	-	PPIE,HNRNPA2B1,HNRNPA1	Gain	1	530	0.00188679245283019
10	53806568	->A	PCDH15	UTR3	UCEC	TTTTAA	+	PPIE	Loss	1	530	0.00188679245283019
10	53806568	->T	PCDH15	UTR3	UCEC	TTTTAA	-	PPIE	Loss	1	530	0.00188679245283019
10	53806568	->T	PCDH15	UTR3	UCEC	TTTTAT	-	PPIE	Gain	1	530	0.00188679245283019
10	53811547	A>G	PCDH15	splicing	UCEC	ACCCAT	+	HNRNPK	Loss	1	530	0.00188679245283019
10	53811547	T>C	PCDH15	splicing	UCEC	CACATC	-	SRSF5	Gain	1	530	0.00188679245283019
10	53811547	T>C	PCDH15	splicing	UCEC	GGGTAC	-	SRSF1*,HNRNPC*,YTHDC1	Loss	1	530	0.00188679245283019
10	53811547	T>C	PCDH15	splicing	UCEC	TACATC	-	SRSF5	Loss	1	530	0.00188679245283019
10	53821372	G>A	PCDH15	UTR3	UCEC	ACCAAA	-	RBMX	Gain	2	530	0.00377358490566038
10	53821372	C>T	PCDH15	UTR3	UCEC	CGGTAG	+	ZRANB2	Loss	2	530	0.00377358490566038
10	53821372	C>T	PCDH15	UTR3	UCEC	TTACTTT	+	PTBP1,RBM41,RBM41	Gain	2	530	0.00377358490566038
10	53821380	A>C	PCDH15	UTR3	UCEC	AAATACT	-	TUT1	Loss	1	530	0.00188679245283019
10	53821380	A>C	PCDH15	UTR3	UCEC	AAGAAC	-	TRA2B	Gain	1	530	0.00188679245283019
10	53821380	A>C	PCDH15	UTR3	UCEC	AATACTA	-	RBM3	Loss	1	530	0.00188679245283019
10	53821380	A>C	PCDH15	UTR3	UCEC	AGAAGAAC	-	SRSF1,SFRS1	Gain	1	530	0.00188679245283019
10	53821380	T>G	PCDH15	UTR3	UCEC	AGTAGTT	+	msiCONSTRUCT	Gain	1	530	0.00188679245283019
10	53821380	T>G	PCDH15	UTR3	UCEC	GGTAGTAG	+	HNRNPA2B1	Gain	1	530	0.00188679245283019
10	53821380	T>G	PCDH15	UTR3	UCEC	GTAGTAGT	+	HNRNPA1	Gain	1	530	0.00188679245283019
10	53821380	T>G	PCDH15	UTR3	UCEC	TAGTAT	+	KHSRP	Loss	1	530	0.00188679245283019
10	53821403	C>T	PCDH15	UTR3	UCEC	AGGTTT	+	ZRANB2	Gain	1	530	0.00188679245283019
10	53821403	C>T	PCDH15	UTR3	UCEC	TAGGCT	+	HNRNPA1	Loss	1	530	0.00188679245283019
10	53821403	C>T	PCDH15	UTR3	UCEC	TAGGTT	+	KHSRP	Gain	1	530	0.00188679245283019
10	53821403	G>A	PCDH15	UTR3	UCEC	TGAAGCC	-	SRSF9,SRSF1	Loss	1	530	0.00188679245283019
10	53821418	C>A	PCDH15	UTR3	UCEC	AGGTTA	-	ZRANB2	Gain	1	530	0.00188679245283019
10	53821418	C>A	PCDH15	UTR3	UCEC	TAGGTTA	-	DAZAP1,Hrb27C,Hrb27C	Gain	1	530	0.00188679245283019
10	53821418	C>A	PCDH15	UTR3	UCEC	TATGTT	-	CELF2	Gain	1	530	0.00188679245283019
10	53821721	T>G	PCDH15	UTR3	UCEC	AAATTA	+	PPIE	Loss	1	530	0.00188679245283019
10	53821721	T>G	PCDH15	UTR3	UCEC	AAATTAA	+	KHDRBS2	Loss	1	530	0.00188679245283019
10	53821721	T>G	PCDH15	UTR3	UCEC	AATGAAA	+	RBM46	Gain	1	530	0.00188679245283019
10	53821721	T>G	PCDH15	UTR3	UCEC	AATTAA	+	PPIE	Loss	1	530	0.00188679245283019
10	53821721	A>C	PCDH15	UTR3	UCEC	AATTTA	-	HNRNPDL,DAZAP1,HNRNPA2B1,HNRNPD,HNRNPA1,HNRNPA0,PPIE	Loss	1	530	0.00188679245283019
10	53821721	T>G	PCDH15	UTR3	UCEC	ATGAAAA	+	SRSF9	Gain	1	530	0.00188679245283019
10	53821721	T>G	PCDH15	UTR3	UCEC	ATTAAA	+	PPIE	Loss	1	530	0.00188679245283019
10	53821721	A>C	PCDH15	UTR3	UCEC	GTTTTTA	-	ELAVL2	Loss	1	530	0.00188679245283019
10	53821721	A>C	PCDH15	UTR3	UCEC	GTTTTTC	-	TIAL1,TIA1	Gain	1	530	0.00188679245283019
10	53821721	T>G	PCDH15	UTR3	UCEC	TAAAAA	+	PPIE	Loss	1	530	0.00188679245283019
10	53821721	T>G	PCDH15	UTR3	UCEC	TAAATT	+	PPIE	Loss	1	530	0.00188679245283019
10	53821721	A>C	PCDH15	UTR3	UCEC	TAATTT	-	PPIE	Loss	1	530	0.00188679245283019
10	53821721	T>G	PCDH15	UTR3	UCEC	TTAAAA	+	KHDRBS1,PPIE	Loss	1	530	0.00188679245283019
10	53821721	T>G	PCDH15	UTR3	UCEC	TTAAATT	+	TRNAU1AP	Loss	1	530	0.00188679245283019
10	53821721	A>C	PCDH15	UTR3	UCEC	TTAATT	-	PPIE	Loss	1	530	0.00188679245283019
10	53821721	A>C	PCDH15	UTR3	UCEC	TTAATTT	-	SFPQ	Loss	1	530	0.00188679245283019
10	53821721	A>C	PCDH15	UTR3	UCEC	TTTAAT	-	PPIE	Loss	1	530	0.00188679245283019
10	53821721	A>C	PCDH15	UTR3	UCEC	TTTAATT	-	RBM15B	Loss	1	530	0.00188679245283019
10	53821721	A>C	PCDH15	UTR3	UCEC	TTTTAA	-	PPIE	Loss	1	530	0.00188679245283019
10	53821721	A>C	PCDH15	UTR3	UCEC	TTTTAATTT	-	ELAVL2	Loss	1	530	0.00188679245283019
10	53821721	A>C	PCDH15	UTR3	UCEC	TTTTTA	-	PPIE,HNRNPC	Loss	1	530	0.00188679245283019
10	53821721	A>C	PCDH15	UTR3	UCEC	TTTTTC	-	HNRNPC	Gain	1	530	0.00188679245283019
10	53821730	->A	PCDH15	UTR3	UCEC	GAAGAA	+	SRSF1,TRA2B	Gain	1	530	0.00188679245283019
10	53821730	->T	PCDH15	UTR3	UCEC	TTCTTC	-	PTBP1	Gain	1	530	0.00188679245283019
10	53821730	->T	PCDH15	UTR3	UCEC	TTTCTCG	-	SRSF6	Loss	1	530	0.00188679245283019
10	53821731	A>-	PCDH15	UTR3	UCEC	AAAAAA	+	PPIE	Loss	1	530	0.00188679245283019
10	53821731	A>-	PCDH15	UTR3	UCEC	AAAAAAA	+	ELAVL4,PCBP1,SYNCRIP,HNRNPU,FMR1,RBM5,IGHMBP2,PABPC4,FUS,HNRNPD,SART3,HNRNPK,PABPC1,DAZAP1,HNRNPA1,LmjF354130,PABPC4,PABPC4	Loss	1	530	0.00188679245283019
10	53821731	A>-	PCDH15	UTR3	UCEC	AAAAAAAA	+	IGHMBP2,PABPC1	Loss	1	530	0.00188679245283019
10	53821731	T>-	PCDH15	UTR3	UCEC	GTTTTTTTC	-	TIAL1	Gain	1	530	0.00188679245283019
10	53821731	T>-	PCDH15	UTR3	UCEC	GTTTTTTTTC	-	TIA1	Loss	1	530	0.00188679245283019
10	53821731	T>-	PCDH15	UTR3	UCEC	TTTTTT	-	KHDRBS1,HNRNPC,DDX19B,EIF4A3,PPIE,CPEB4	Loss	1	530	0.00188679245283019
10	53821731	T>-	PCDH15	UTR3	UCEC	TTTTTTT	-	DAZAP1,TIA1,ELAVL1,ELAVL4,PCBP1,U2AF2,HNRNPCL1,HNRNPA1,HNRNPC,FUS,NOVA1,SFPQ,NOVA2,KHDRBS2,PCBP2,RALY,KHDRBS1,FMR1,ELAVL3,KHDRBS3,HNRNPU,DDX19B,HNRNPK,SYNCRIP,PTBP1,egw103003671,ELAVL1,gw184451,HNRNPC,HNRNPCL1,PUF60,Sxl,TVAG514790	Loss	1	530	0.00188679245283019
10	53821761	A>G	PCDH15	UTR3	UCEC	ACCCCAA	-	HNRNPK	Loss	1	530	0.00188679245283019
10	53821761	A>G	PCDH15	UTR3	UCEC	ATTTTA	-	PPIE,TIAL1,KHSRP	Loss	1	530	0.00188679245283019
10	53821761	A>G	PCDH15	UTR3	UCEC	ATTTTG	-	TIA1,TIAL1	Gain	1	530	0.00188679245283019
10	53821761	T>C	PCDH15	UTR3	UCEC	CAAAAT	+	KHDRBS1	Gain	1	530	0.00188679245283019
10	53821761	T>C	PCDH15	UTR3	UCEC	GGGTAA	+	ZRANB2	Loss	1	530	0.00188679245283019
10	53821761	T>C	PCDH15	UTR3	UCEC	TAAAAT	+	PPIE	Loss	1	530	0.00188679245283019
10	53821761	T>C	PCDH15	UTR3	UCEC	TGGGGT	+	HNRNPF,HNRNPH2,HNRNPH1	Loss	1	530	0.00188679245283019
10	53821761	A>G	PCDH15	UTR3	UCEC	TTGCCC	-	MBNL1	Gain	1	530	0.00188679245283019
10	53821761	A>G	PCDH15	UTR3	UCEC	TTTTAC	-	KHDRBS1	Loss	1	530	0.00188679245283019
10	53821791	A>C	PCDH15	UTR3	UCEC	AAATTT	+	PPIE	Loss	1	530	0.00188679245283019
10	53821791	T>G	PCDH15	UTR3	UCEC	AAATTT	-	PPIE	Loss	1	530	0.00188679245283019
10	53831534	C>A	PCDH15	splicing	UCEC	AAAAATA	+	NUPL2,PABPN1L	Gain	1	530	0.00188679245283019
10	53831534	C>A	PCDH15	splicing	UCEC	AAAATA	+	PPIE	Gain	1	530	0.00188679245283019
10	53831534	C>A	PCDH15	splicing	UCEC	AAAATAT	+	PABPN1L	Gain	1	530	0.00188679245283019
10	53831534	C>A	PCDH15	splicing	UCEC	AAATAT	+	PPIE	Gain	1	530	0.00188679245283019
10	53831534	G>T	PCDH15	splicing	UCEC	AAATAT	-	PPIE	Gain	1	530	0.00188679245283019
10	53831534	C>A	PCDH15	splicing	UCEC	AATATT	+	PPIE	Gain	1	530	0.00188679245283019
10	53831534	G>T	PCDH15	splicing	UCEC	AATATT	-	PPIE	Gain	1	530	0.00188679245283019
10	53831534	G>T	PCDH15	splicing	UCEC	ATAAAG	-	KHDRBS3	Loss	1	530	0.00188679245283019
10	53831534	G>T	PCDH15	splicing	UCEC	ATAAAT	-	PPIE	Gain	1	530	0.00188679245283019
10	53831534	C>A	PCDH15	splicing	UCEC	ATATTT	+	PPIE	Gain	1	530	0.00188679245283019
10	53831534	G>T	PCDH15	splicing	UCEC	ATATTT	-	PPIE	Gain	1	530	0.00188679245283019
10	53831534	C>A	PCDH15	splicing	UCEC	ATATTTA	+	shep,sup26CONSTRUCT	Gain	1	530	0.00188679245283019
10	53831534	C>A	PCDH15	splicing	UCEC	ATTTAT	+	PPIE	Gain	1	530	0.00188679245283019
10	53831534	G>T	PCDH15	splicing	UCEC	TAAATA	-	PPIE	Gain	1	530	0.00188679245283019
10	53831534	C>A	PCDH15	splicing	UCEC	TATTTA	+	PPIE,KHSRP	Gain	1	530	0.00188679245283019
10	53831534	C>A	PCDH15	splicing	UCEC	TATTTAT	+	ZFP36	Gain	1	530	0.00188679245283019
10	53831534	C>A	PCDH15	splicing	UCEC	TATTTATT	+	KHSRP	Gain	1	530	0.00188679245283019
10	53831534	G>T	PCDH15	splicing	UCEC	TATTTT	-	PPIE	Gain	1	530	0.00188679245283019
10	53831534	G>T	PCDH15	splicing	UCEC	TATTTTT	-	TRNAU1AP	Gain	1	530	0.00188679245283019
10	53903372	A>G	PCDH15	splicing	UCEC	CCGGGCA	-	SRSF1	Gain	1	530	0.00188679245283019
10	53903372	T>C	PCDH15	splicing	UCEC	CGGAGGA	+	LIN28A,SRSF1,LIN28A	Gain	1	530	0.00188679245283019
10	53903372	A>G	PCDH15	splicing	UCEC	CGGGCA	-	RBM25	Gain	1	530	0.00188679245283019
10	53903372	A>G	PCDH15	splicing	UCEC	GTCCTCCG	-	SRSF2	Gain	1	530	0.00188679245283019
10	53903372	T>C	PCDH15	splicing	UCEC	TGGAGGA	+	SRSF9,SRSF1,LIN28A	Loss	1	530	0.00188679245283019
10	53903372	T>C	PCDH15	splicing	UCEC	TGGAGGAC	+	SFPQ	Loss	1	530	0.00188679245283019
10	53903372	T>C	PCDH15	splicing	UCEC	TTGCCC	+	MBNL1	Gain	1	530	0.00188679245283019
10	53903372	T>C	PCDH15	splicing	UCEC	TTGCCT	+	MBNL1	Loss	1	530	0.00188679245283019
10	53905203	A>G	PCDH15	intronic	UCEC	ACTAAAC	+	PFF0320c	Loss	1	530	0.00188679245283019
10	53905203	T>C	PCDH15	intronic	UCEC	CAGTCAC	-	NOVA1	Gain	1	530	0.00188679245283019
10	53905203	T>C	PCDH15	intronic	UCEC	TCAGTCAC	-	NOVA1	Gain	1	530	0.00188679245283019
10	53905203	A>G	PCDH15	intronic	UCEC	TGACTG	+	RBFOX2*,RBFOX1*	Gain	1	530	0.00188679245283019
10	53938812	A>G	PCDH15	intronic	UCEC	TAAGTTA	-	DAZAP1	Loss	1	530	0.00188679245283019
10	53938812	T>C	PCDH15	intronic	UCEC	TTACTTT	+	PTBP1,RBM41,RBM41	Loss	1	530	0.00188679245283019
10	53995503	G>T	PCDH15	UTR3	UCEC	ATTAAA	+	PPIE	Gain	1	530	0.00188679245283019
10	53995503	C>A	PCDH15	UTR3	UCEC	ATTTAA	-	KHDRBS1,HNRNPA1,HNRNPA2B1,PPIE	Gain	1	530	0.00188679245283019
10	53995503	G>T	PCDH15	UTR3	UCEC	GATGAAA	+	RBM46	Loss	1	530	0.00188679245283019
10	53995503	G>T	PCDH15	UTR3	UCEC	GGATTAA	+	ZCRB1	Gain	1	530	0.00188679245283019
10	53995503	G>T	PCDH15	UTR3	UCEC	TAAATA	+	PPIE	Gain	1	530	0.00188679245283019
10	53995503	G>T	PCDH15	UTR3	UCEC	TAAATAA	+	KHDRBS3	Gain	1	530	0.00188679245283019
10	53995503	C>A	PCDH15	UTR3	UCEC	TATTTA	-	PPIE,KHSRP	Gain	1	530	0.00188679245283019
10	53995503	C>A	PCDH15	UTR3	UCEC	TATTTAA	-	KHDRBS3,RBMS3	Gain	1	530	0.00188679245283019
10	53995503	G>T	PCDH15	UTR3	UCEC	TTAAAT	+	KHDRBS1,PPIE	Gain	1	530	0.00188679245283019
10	53995503	C>A	PCDH15	UTR3	UCEC	TTATTTAAT	-	ZFP36	Gain	1	530	0.00188679245283019
10	53995503	C>A	PCDH15	UTR3	UCEC	TTTAAT	-	PPIE	Gain	1	530	0.00188679245283019
10	53995516	G>T	PCDH15	UTR3	UCEC	AAAAGA	+	PABPN1	Loss	3	530	0.00566037735849057
10	53995516	G>T	PCDH15	UTR3	UCEC	AAAAGAA	+	SRSF10	Loss	3	530	0.00566037735849057
10	53995516	G>T	PCDH15	UTR3	UCEC	AAAATA	+	PPIE	Gain	3	530	0.00566037735849057
10	53995516	G>T	PCDH15	UTR3	UCEC	AAAGAAC	+	SFRS13A	Loss	3	530	0.00566037735849057
10	53995516	G>T	PCDH15	UTR3	UCEC	AAATAA	+	PPIE	Gain	3	530	0.00566037735849057
10	53995516	G>T	PCDH15	UTR3	UCEC	AAGAAC	+	TRA2B	Loss	3	530	0.00566037735849057
10	53995516	C>A	PCDH15	UTR3	UCEC	ATTTTA	-	PPIE,TIAL1,KHSRP	Gain	3	530	0.00566037735849057
10	53995516	C>A	PCDH15	UTR3	UCEC	CTTTTA	-	ELAVL2,TIAL1,TIA1	Loss	3	530	0.00566037735849057
10	53995516	G>T	PCDH15	UTR3	UCEC	TAAAAT	+	PPIE	Gain	3	530	0.00566037735849057
10	53995516	C>A	PCDH15	UTR3	UCEC	TATTTT	-	PPIE	Gain	3	530	0.00566037735849057
10	53995516	C>A	PCDH15	UTR3	UCEC	TCTTTT	-	ZFP36	Loss	3	530	0.00566037735849057
10	53995516	C>A	PCDH15	UTR3	UCEC	TGTTATT	-	KHSRP	Gain	3	530	0.00566037735849057
10	53995516	C>A	PCDH15	UTR3	UCEC	TGTTCTT	-	ZNF638	Loss	3	530	0.00566037735849057
10	53995516	C>A	PCDH15	UTR3	UCEC	TTATTT	-	PPIE	Gain	3	530	0.00566037735849057
10	53995516	C>A	PCDH15	UTR3	UCEC	TTATTTT	-	ELAVL1,BOLL,ELAVL1	Gain	3	530	0.00566037735849057
10	53995516	C>A	PCDH15	UTR3	UCEC	TTCTTT	-	PTBP1	Loss	3	530	0.00566037735849057
10	53995516	C>A	PCDH15	UTR3	UCEC	TTCTTTT	-	PTBP1	Loss	3	530	0.00566037735849057
10	53995554	G>T	PCDH15	UTR3	UCEC	GAGACTA	+	RBM3	Loss	1	530	0.00188679245283019
10	53995554	G>T	PCDH15	UTR3	UCEC	TACAGA	+	SRSF5	Loss	1	530	0.00188679245283019
10	53995554	G>T	PCDH15	UTR3	UCEC	TACATA	+	SRSF5	Gain	1	530	0.00188679245283019
10	53995586	A>-	PCDH15	UTR3	UCEC	ATAAAT	-	PPIE	Loss	1	530	0.00188679245283019
10	53995586	T>-	PCDH15	UTR3	UCEC	ATTTAT	+	PPIE	Loss	1	530	0.00188679245283019
10	54089982	A>G	PCDH15	splicing	UCEC	ACTTGC	+	ZFP36	Gain	1	530	0.00188679245283019
10	54089982	T>C	PCDH15	splicing	UCEC	CAAGTTA	-	DAZ3	Gain	1	530	0.00188679245283019
10	54089982	T>C	PCDH15	splicing	UCEC	TAAGTTA	-	DAZAP1	Loss	1	530	0.00188679245283019
10	54133008	C>A	PCDH15	splicing	UCEC	TCATGC	+	YTHDC1	Gain	1	530	0.00188679245283019
10	54133008	C>A	PCDH15	splicing	UCEC	TCCTGC	+	ZFP36,YTHDC1	Loss	1	530	0.00188679245283019
10	54133008	G>T	PCDH15	splicing	UCEC	TGCATG	-	RBFOX2,KHSRP,RBFOX1,A2BP1	Gain	1	530	0.00188679245283019
10	54133008	G>T	PCDH15	splicing	UCEC	TGCATGA	-	RBFOX1,asd1,fox1	Gain	1	530	0.00188679245283019
10	54346364	G>A	PCDH15	splicing	UCEC	CGGTAT	-	ZRANB2	Loss	1	530	0.00188679245283019
10	54346364	G>A	PCDH15	splicing	UCEC	GTATGT	-	CELF2	Loss	1	530	0.00188679245283019
10	60028567	G>A	ANK3	UTR3	UCEC	AAAAATA	+	NUPL2,PABPN1L	Gain	1	530	0.00188679245283019
10	60028567	G>A	ANK3	UTR3	UCEC	AAAATA	+	PPIE	Gain	1	530	0.00188679245283019
10	60028567	G>A	ANK3	UTR3	UCEC	ACCCTT	+	HNRNPK	Gain	1	530	0.00188679245283019
10	60028567	C>T	ANK3	UTR3	UCEC	AGGGTAT	-	SRSF2	Gain	1	530	0.00188679245283019
10	60028567	G>A	ANK3	UTR3	UCEC	ATGCCC	+	MBNL1	Loss	1	530	0.00188679245283019
10	60028567	C>T	ANK3	UTR3	UCEC	CATTTTT	-	CPEB2,HNRNPC,RALYL	Loss	1	530	0.00188679245283019
10	60028567	C>T	ANK3	UTR3	UCEC	TATTTT	-	PPIE	Gain	1	530	0.00188679245283019
10	60028567	C>T	ANK3	UTR3	UCEC	TATTTTT	-	TRNAU1AP	Gain	1	530	0.00188679245283019
10	60028582	G>A	ANK3	UTR3	UCEC	ACACAAC	+	HNRNPL	Gain	1	530	0.00188679245283019
10	60028582	G>A	ANK3	UTR3	UCEC	CAACAGC	+	SRSF5	Gain	1	530	0.00188679245283019
10	60028582	G>A	ANK3	UTR3	UCEC	CACAGC	+	SRSF5	Loss	1	530	0.00188679245283019
10	60028582	G>A	ANK3	UTR3	UCEC	CACAGCA	+	SRSF1	Loss	1	530	0.00188679245283019
10	60028582	C>T	ANK3	UTR3	UCEC	CTGCTG	-	MBNL1	Loss	1	530	0.00188679245283019
10	60028582	C>T	ANK3	UTR3	UCEC	CTGTTGT	-	Tbg97262300	Gain	1	530	0.00188679245283019
10	60028582	C>T	ANK3	UTR3	UCEC	GGCTGC	-	YTHDC1	Loss	1	530	0.00188679245283019
10	60028582	C>T	ANK3	UTR3	UCEC	TGTTGT	-	CELF2	Gain	1	530	0.00188679245283019
10	60028582	C>T	ANK3	UTR3	UCEC	TGTTGTG	-	unc75	Gain	1	530	0.00188679245283019
10	60028582	C>T	ANK3	UTR3	UCEC	TTGTGT	-	CELF2	Gain	1	530	0.00188679245283019
10	60028628	T>C	ANK3	UTR3	UCEC	AATCATT	-	RBM46	Loss	1	530	0.00188679245283019
10	60028628	A>G	ANK3	UTR3	UCEC	AATGATT	+	RBM46	Loss	1	530	0.00188679245283019
10	60028628	T>C	ANK3	UTR3	UCEC	CCAACCA	-	SRSF1	Gain	1	530	0.00188679245283019
10	60028628	T>C	ANK3	UTR3	UCEC	CCAATCA	-	IGF2BP2	Loss	1	530	0.00188679245283019
10	60028691	G>T	ANK3	UTR3	UCEC	ACGCTG	-	MBNL1	Loss	1	530	0.00188679245283019
10	60028691	G>T	ANK3	UTR3	UCEC	CAGCACG	-	SNRPA	Loss	1	530	0.00188679245283019
10	60028691	C>A	ANK3	UTR3	UCEC	GAGTGC	+	YTHDC1	Gain	1	530	0.00188679245283019
10	60028691	C>A	ANK3	UTR3	UCEC	GCGTGC	+	YTHDC1	Loss	1	530	0.00188679245283019
10	60028691	C>A	ANK3	UTR3	UCEC	TACAGA	+	SRSF5	Gain	1	530	0.00188679245283019
10	60028691	C>A	ANK3	UTR3	UCEC	TACAGC	+	SRSF5	Loss	1	530	0.00188679245283019
10	60028695	G>A	ANK3	UTR3	UCEC	AACACGC	-	THAPSDRAFT1841	Gain	1	530	0.00188679245283019
10	60028695	G>A	ANK3	UTR3	UCEC	CAGCACG	-	SNRPA	Loss	1	530	0.00188679245283019
10	60028695	C>T	ANK3	UTR3	UCEC	CTGCCA	+	MBNL1	Loss	1	530	0.00188679245283019
10	60028695	C>T	ANK3	UTR3	UCEC	GCGTGC	+	YTHDC1	Loss	1	530	0.00188679245283019
10	60028695	C>T	ANK3	UTR3	UCEC	GTGCTG	+	MBNL1	Loss	1	530	0.00188679245283019
10	60028695	C>T	ANK3	UTR3	UCEC	TGCTGC	+	YTHDC1	Loss	1	530	0.00188679245283019
10	60028695	C>T	ANK3	UTR3	UCEC	TGCTGCC	+	SF1	Loss	1	530	0.00188679245283019
10	60028695	C>T	ANK3	UTR3	UCEC	TTGCCA	+	MBNL1	Gain	1	530	0.00188679245283019
10	60028824	C>-	ANK3	UTR3	UCEC	CCCCCCA	+	PCBP2,SRSF1	Loss	1	530	0.00188679245283019
10	60028824	G>-	ANK3	UTR3	UCEC	GGGGGG	-	RBM5	Loss	1	530	0.00188679245283019
10	60028831	G>-	ANK3	UTR3	UCEC	AGGGGGT	-	HNRNPH2	Loss	1	530	0.00188679245283019
10	60028831	C>-	ANK3	UTR3	UCEC	CACCCCC	+	RBM6	Loss	1	530	0.00188679245283019
10	60028844	G>A	ANK3	UTR3	UCEC	CGGTAA	-	ZRANB2	Gain	1	530	0.00188679245283019
10	60028844	G>A	ANK3	UTR3	UCEC	CGGTAG	-	ZRANB2	Loss	1	530	0.00188679245283019
10	60028844	G>A	ANK3	UTR3	UCEC	GTAATTG	-	SFPQ,ENSGALG00000003765	Gain	1	530	0.00188679245283019
10	60028844	G>A	ANK3	UTR3	UCEC	GTAGTTG	-	SFPQ	Loss	1	530	0.00188679245283019
10	60028856	A>G	ANK3	UTR3	UCEC	AAATAA	-	PPIE	Loss	1	530	0.00188679245283019
10	60028856	T>C	ANK3	UTR3	UCEC	AGGTTA	+	ZRANB2	Loss	1	530	0.00188679245283019
10	60028856	T>C	ANK3	UTR3	UCEC	TAGGCT	+	HNRNPA1	Gain	1	530	0.00188679245283019
10	60028856	T>C	ANK3	UTR3	UCEC	TAGGTT	+	KHSRP	Loss	1	530	0.00188679245283019
10	60028856	T>C	ANK3	UTR3	UCEC	TAGGTTA	+	DAZAP1,Hrb27C,Hrb27C	Loss	1	530	0.00188679245283019
10	60028856	T>C	ANK3	UTR3	UCEC	TTATTT	+	PPIE	Loss	1	530	0.00188679245283019
10	60028856	T>C	ANK3	UTR3	UCEC	TTATTTT	+	ELAVL1,BOLL,ELAVL1	Loss	1	530	0.00188679245283019
10	60028859	A>-	ANK3	UTR3	UCEC	AAAAAA	-	PPIE	Loss	6	530	0.0113207547169811
10	60028859	A>-	ANK3	UTR3	UCEC	AAAAAAA	-	ELAVL4,PCBP1,SYNCRIP,HNRNPU,FMR1,RBM5,IGHMBP2,PABPC4,FUS,HNRNPD,SART3,HNRNPK,PABPC1,DAZAP1,HNRNPA1,LmjF354130,PABPC4,PABPC4	Loss	6	530	0.0113207547169811
10	60028859	A>-	ANK3	UTR3	UCEC	AAAAAAAA	-	IGHMBP2,PABPC1	Loss	6	530	0.0113207547169811
10	60028859	A>-	ANK3	UTR3	UCEC	AAAAAAAAA	-	AGO2	Loss	6	530	0.0113207547169811
10	60028859	T>-	ANK3	UTR3	UCEC	TTTTTT	+	KHDRBS1,HNRNPC,DDX19B,EIF4A3,PPIE,CPEB4	Loss	6	530	0.0113207547169811
10	60028859	T>-	ANK3	UTR3	UCEC	TTTTTTT	+	DAZAP1,TIA1,ELAVL1,ELAVL4,PCBP1,U2AF2,HNRNPCL1,HNRNPA1,HNRNPC,FUS,NOVA1,SFPQ,NOVA2,KHDRBS2,PCBP2,RALY,KHDRBS1,FMR1,ELAVL3,KHDRBS3,HNRNPU,DDX19B,HNRNPK,SYNCRIP,PTBP1,egw103003671,ELAVL1,gw184451,HNRNPC,HNRNPCL1,PUF60,Sxl,TVAG514790	Loss	6	530	0.0113207547169811
10	60028859	T>-	ANK3	UTR3	UCEC	TTTTTTTTT	+	TIA1	Loss	6	530	0.0113207547169811
10	60028863	A>C	ANK3	UTR3	UCEC	AAAAAA	-	PPIE	Loss	1	530	0.00188679245283019
10	60028863	A>C	ANK3	UTR3	UCEC	AAAAAAA	-	ELAVL4,PCBP1,SYNCRIP,HNRNPU,FMR1,RBM5,IGHMBP2,PABPC4,FUS,HNRNPD,SART3,HNRNPK,PABPC1,DAZAP1,HNRNPA1,LmjF354130,PABPC4,PABPC4	Loss	1	530	0.00188679245283019
10	60028863	A>C	ANK3	UTR3	UCEC	AAAAAAAA	-	IGHMBP2,PABPC1	Loss	1	530	0.00188679245283019
10	60028863	A>C	ANK3	UTR3	UCEC	AAAAAAAAA	-	AGO2	Loss	1	530	0.00188679245283019
10	60028863	A>C	ANK3	UTR3	UCEC	AAAAAT	-	PPIE	Loss	1	530	0.00188679245283019
10	60028863	A>C	ANK3	UTR3	UCEC	AAAAATA	-	NUPL2,PABPN1L	Loss	1	530	0.00188679245283019
10	60028863	A>C	ANK3	UTR3	UCEC	AAACAAA	-	HNRNPL	Gain	1	530	0.00188679245283019
10	60028863	T>G	ANK3	UTR3	UCEC	ATTTTG	+	TIA1,TIAL1	Gain	1	530	0.00188679245283019
10	60028863	T>G	ANK3	UTR3	UCEC	ATTTTT	+	PPIE	Loss	1	530	0.00188679245283019
10	60028863	T>G	ANK3	UTR3	UCEC	ATTTTTT	+	HNRNPCL1,HNRNPC,TIA1,PTBP1,BOLL,HNRNPC,HNRNPCL1,Smp067420,HNRNPC,HNRNPCL1	Loss	1	530	0.00188679245283019
10	60028863	A>C	ANK3	UTR3	UCEC	CAAAACA	-	IGF2BP2	Gain	1	530	0.00188679245283019
10	60028863	A>C	ANK3	UTR3	UCEC	CAAAAT	-	KHDRBS1	Gain	1	530	0.00188679245283019
10	60028863	T>G	ANK3	UTR3	UCEC	GTTTTG	+	TIA1	Gain	1	530	0.00188679245283019
10	60028863	T>G	ANK3	UTR3	UCEC	TATTTTT	+	TRNAU1AP	Loss	1	530	0.00188679245283019
10	60028863	T>G	ANK3	UTR3	UCEC	TTGTTTT	+	ELAVL1	Gain	1	530	0.00188679245283019
10	60028863	T>G	ANK3	UTR3	UCEC	TTTGTTT	+	ELAVL1,elav,ELAVL1,ELAVL1,ZC3H14CONSTRUCT,ZC3H14	Gain	1	530	0.00188679245283019
10	60028863	T>G	ANK3	UTR3	UCEC	TTTTTG	+	HNRNPC	Loss	1	530	0.00188679245283019
10	60028863	T>G	ANK3	UTR3	UCEC	TTTTTGT	+	TIA1	Loss	1	530	0.00188679245283019
10	60028863	T>G	ANK3	UTR3	UCEC	TTTTTT	+	KHDRBS1,HNRNPC,DDX19B,EIF4A3,PPIE,CPEB4	Loss	1	530	0.00188679245283019
10	60028863	T>G	ANK3	UTR3	UCEC	TTTTTTG	+	HNRNPCL1,HNRNPC,ELAVL1,TIA1,RALY,PFI1435w,RALY,TIA1,RALY,TIA1	Loss	1	530	0.00188679245283019
10	60028863	T>G	ANK3	UTR3	UCEC	TTTTTTT	+	DAZAP1,TIA1,ELAVL1,ELAVL4,PCBP1,U2AF2,HNRNPCL1,HNRNPA1,HNRNPC,FUS,NOVA1,SFPQ,NOVA2,KHDRBS2,PCBP2,RALY,KHDRBS1,FMR1,ELAVL3,KHDRBS3,HNRNPU,DDX19B,HNRNPK,SYNCRIP,PTBP1,egw103003671,ELAVL1,gw184451,HNRNPC,HNRNPCL1,PUF60,Sxl,TVAG514790	Loss	1	530	0.00188679245283019
10	60028863	T>G	ANK3	UTR3	UCEC	TTTTTTTTT	+	TIA1	Loss	1	530	0.00188679245283019
10	60028936	A>T	ANK3	UTR3	UCEC	AAACACA	-	IGF2BP2,IGF2BP3,HNRNPL	Loss	1	530	0.00188679245283019
10	60028936	T>A	ANK3	UTR3	UCEC	TACAGA	+	SRSF5	Loss	1	530	0.00188679245283019
10	60028936	T>A	ANK3	UTR3	UCEC	TGTGTTA	+	BOLL	Gain	1	530	0.00188679245283019
10	60028936	T>A	ANK3	UTR3	UCEC	TGTGTTT	+	CELF4,CELF5,FUBP1	Loss	1	530	0.00188679245283019
10	60029045	A>C	ANK3	UTR3	UCEC	AAAAAA	+	PPIE	Loss	1	530	0.00188679245283019
10	60029045	A>C	ANK3	UTR3	UCEC	AAAAAAA	+	ELAVL4,PCBP1,SYNCRIP,HNRNPU,FMR1,RBM5,IGHMBP2,PABPC4,FUS,HNRNPD,SART3,HNRNPK,PABPC1,DAZAP1,HNRNPA1,LmjF354130,PABPC4,PABPC4	Loss	1	530	0.00188679245283019
10	60029045	A>C	ANK3	UTR3	UCEC	AGAAAAA	+	PABPC1,SART3,PABPC1,SART3,Tbg97295210,TVAG002940	Loss	1	530	0.00188679245283019
10	60029045	A>C	ANK3	UTR3	UCEC	AGACAA	+	SRSF10	Gain	1	530	0.00188679245283019
10	60029045	A>C	ANK3	UTR3	UCEC	AGACAAA	+	FXR2	Gain	1	530	0.00188679245283019
10	60029045	T>G	ANK3	UTR3	UCEC	ATTTTTG	-	TIA1,HNRNPC,HNRNPCL1	Gain	1	530	0.00188679245283019
10	60029045	T>G	ANK3	UTR3	UCEC	ATTTTTT	-	HNRNPCL1,HNRNPC,TIA1,PTBP1,BOLL,HNRNPC,HNRNPCL1,Smp067420,HNRNPC,HNRNPCL1	Loss	1	530	0.00188679245283019
10	60029045	T>G	ANK3	UTR3	UCEC	ATTTTTTTC	-	TIAL1	Loss	1	530	0.00188679245283019
10	60029045	A>C	ANK3	UTR3	UCEC	GAAGAA	+	SRSF1,TRA2B	Loss	1	530	0.00188679245283019
10	60029045	A>C	ANK3	UTR3	UCEC	GACAAA	+	SRSF10	Gain	1	530	0.00188679245283019
10	60029045	A>C	ANK3	UTR3	UCEC	TGAAGAA	+	SRSF1	Loss	1	530	0.00188679245283019
10	60029045	A>C	ANK3	UTR3	UCEC	TGAAGAC	+	SRSF1	Gain	1	530	0.00188679245283019
10	60029045	T>G	ANK3	UTR3	UCEC	TTCTTC	-	PTBP1	Loss	1	530	0.00188679245283019
10	60029045	T>G	ANK3	UTR3	UCEC	TTTTTC	-	HNRNPC	Loss	1	530	0.00188679245283019
10	60029045	T>G	ANK3	UTR3	UCEC	TTTTTCT	-	TIA1,PTBP1	Loss	1	530	0.00188679245283019
10	60029045	T>G	ANK3	UTR3	UCEC	TTTTTG	-	HNRNPC	Gain	1	530	0.00188679245283019
10	60029045	T>G	ANK3	UTR3	UCEC	TTTTTGT	-	TIA1	Gain	1	530	0.00188679245283019
10	60029045	T>G	ANK3	UTR3	UCEC	TTTTTT	-	KHDRBS1,HNRNPC,DDX19B,EIF4A3,PPIE,CPEB4	Loss	1	530	0.00188679245283019
10	60029045	T>G	ANK3	UTR3	UCEC	TTTTTTC	-	RALY,U2AF2,TIA1,TIA1,U2AF2,U2af50,U2AF2	Loss	1	530	0.00188679245283019
10	60029045	T>G	ANK3	UTR3	UCEC	TTTTTTT	-	DAZAP1,TIA1,ELAVL1,ELAVL4,PCBP1,U2AF2,HNRNPCL1,HNRNPA1,HNRNPC,FUS,NOVA1,SFPQ,NOVA2,KHDRBS2,PCBP2,RALY,KHDRBS1,FMR1,ELAVL3,KHDRBS3,HNRNPU,DDX19B,HNRNPK,SYNCRIP,PTBP1,egw103003671,ELAVL1,gw184451,HNRNPC,HNRNPCL1,PUF60,Sxl,TVAG514790	Loss	1	530	0.00188679245283019
10	60029083	C>T	ANK3	UTR3	UCEC	TCAAAA	-	RBMX	Gain	1	530	0.00188679245283019
10	60029083	C>T	ANK3	UTR3	UCEC	TCCCAA	-	HNRNPK	Loss	1	530	0.00188679245283019
10	60029083	G>A	ANK3	UTR3	UCEC	TGGGAAT	+	ESRP2	Loss	1	530	0.00188679245283019
10	60029120	A>-	ANK3	UTR3	UCEC	AAAAAA	-	PPIE	Loss	4	530	0.00754716981132075
10	60029120	A>-	ANK3	UTR3	UCEC	AAAAAAA	-	ELAVL4,PCBP1,SYNCRIP,HNRNPU,FMR1,RBM5,IGHMBP2,PABPC4,FUS,HNRNPD,SART3,HNRNPK,PABPC1,DAZAP1,HNRNPA1,LmjF354130,PABPC4,PABPC4	Loss	4	530	0.00754716981132075
10	60029120	A>-	ANK3	UTR3	UCEC	AAAAAAAA	-	IGHMBP2,PABPC1	Loss	4	530	0.00754716981132075
10	60029120	A>-	ANK3	UTR3	UCEC	AAAAAAAAA	-	AGO2	Loss	4	530	0.00754716981132075
10	60029120	T>-	ANK3	UTR3	UCEC	TTTTTT	+	KHDRBS1,HNRNPC,DDX19B,EIF4A3,PPIE,CPEB4	Loss	4	530	0.00754716981132075
10	60029120	T>-	ANK3	UTR3	UCEC	TTTTTTT	+	DAZAP1,TIA1,ELAVL1,ELAVL4,PCBP1,U2AF2,HNRNPCL1,HNRNPA1,HNRNPC,FUS,NOVA1,SFPQ,NOVA2,KHDRBS2,PCBP2,RALY,KHDRBS1,FMR1,ELAVL3,KHDRBS3,HNRNPU,DDX19B,HNRNPK,SYNCRIP,PTBP1,egw103003671,ELAVL1,gw184451,HNRNPC,HNRNPCL1,PUF60,Sxl,TVAG514790	Loss	4	530	0.00754716981132075
10	60029120	T>-	ANK3	UTR3	UCEC	TTTTTTTTT	+	TIA1	Loss	4	530	0.00754716981132075
10	60029144	C>A	ANK3	UTR3	UCEC	AAAAAT	-	PPIE	Gain	1	530	0.00188679245283019
10	60029144	G>T	ANK3	UTR3	UCEC	AGCAGTT	+	SRSF4	Loss	1	530	0.00188679245283019
10	60029144	G>T	ANK3	UTR3	UCEC	ATTTTT	+	PPIE	Gain	1	530	0.00188679245283019
10	60029144	G>T	ANK3	UTR3	UCEC	ATTTTTG	+	TIA1,HNRNPC,HNRNPCL1	Gain	1	530	0.00188679245283019
10	60029144	G>T	ANK3	UTR3	UCEC	CATTTTT	+	CPEB2,HNRNPC,RALYL	Gain	1	530	0.00188679245283019
10	60029144	C>A	ANK3	UTR3	UCEC	CTGCTA	-	MBNL1	Loss	1	530	0.00188679245283019
10	60029144	G>T	ANK3	UTR3	UCEC	GTTTTG	+	TIA1	Loss	1	530	0.00188679245283019
10	60029144	G>T	ANK3	UTR3	UCEC	GTTTTGC	+	TARDBP*	Loss	1	530	0.00188679245283019
10	60029144	G>T	ANK3	UTR3	UCEC	TTTTTG	+	HNRNPC	Gain	1	530	0.00188679245283019
10	60029370	G>A	ANK3	UTR3	UCEC	AACATCA	-	YBX1,YBX2,YB1,YB1,YBX1	Gain	1	530	0.00188679245283019
10	60029370	G>A	ANK3	UTR3	UCEC	AACATCG	-	YBX2,YBX1	Loss	1	530	0.00188679245283019
10	60029370	C>T	ANK3	UTR3	UCEC	TTGATGT	+	SFPQ	Gain	1	530	0.00188679245283019
10	60029381	A>C	ANK3	UTR3	UCEC	AAAAAA	+	PPIE	Loss	1	530	0.00188679245283019
10	60029381	A>C	ANK3	UTR3	UCEC	AAAAAAG	+	PABPC4,ENSXETG00000007102,NAB2CONSTRUCT	Loss	1	530	0.00188679245283019
10	60029381	A>C	ANK3	UTR3	UCEC	AAAAGA	+	PABPN1	Loss	1	530	0.00188679245283019
10	60029381	A>C	ANK3	UTR3	UCEC	AAAAGAA	+	SRSF10	Loss	1	530	0.00188679245283019
10	60029381	T>G	ANK3	UTR3	UCEC	CTTTTT	-	ELAVL2	Loss	1	530	0.00188679245283019
10	60029381	T>G	ANK3	UTR3	UCEC	CTTTTTT	-	HNRNPC,HNRNPCL1,CPEB2,PTBP1,CPEB2,CPEB4,tiar1,tiar3,CPEB2,CPEB4	Loss	1	530	0.00188679245283019
10	60029381	A>C	ANK3	UTR3	UCEC	TAAAAA	+	PPIE	Loss	1	530	0.00188679245283019
10	60029381	T>G	ANK3	UTR3	UCEC	TCTTTT	-	ZFP36	Loss	1	530	0.00188679245283019
10	60029381	T>G	ANK3	UTR3	UCEC	TCTTTTT	-	PTBP1	Loss	1	530	0.00188679245283019
10	60029381	A>C	ANK3	UTR3	UCEC	TTAAAA	+	KHDRBS1,PPIE	Loss	1	530	0.00188679245283019
10	60029381	T>G	ANK3	UTR3	UCEC	TTCTTTT	-	PTBP1	Loss	1	530	0.00188679245283019
10	60029381	A>C	ANK3	UTR3	UCEC	TTTAAA	+	PPIE	Loss	1	530	0.00188679245283019
10	60029381	T>G	ANK3	UTR3	UCEC	TTTAAA	-	PPIE	Loss	1	530	0.00188679245283019
10	60029381	T>G	ANK3	UTR3	UCEC	TTTTAA	-	PPIE	Loss	1	530	0.00188679245283019
10	60029381	T>G	ANK3	UTR3	UCEC	TTTTTA	-	PPIE,HNRNPC	Loss	1	530	0.00188679245283019
10	60029381	T>G	ANK3	UTR3	UCEC	TTTTTT	-	KHDRBS1,HNRNPC,DDX19B,EIF4A3,PPIE,CPEB4	Loss	1	530	0.00188679245283019
10	60029381	T>G	ANK3	UTR3	UCEC	TTTTTTA	-	CPEB1	Loss	1	530	0.00188679245283019
10	60029382	A>C	ANK3	UTR3	UCEC	AAAAAA	+	PPIE	Loss	1	530	0.00188679245283019
10	60029382	A>C	ANK3	UTR3	UCEC	AAAAAAG	+	PABPC4,ENSXETG00000007102,NAB2CONSTRUCT	Loss	1	530	0.00188679245283019
10	60029382	A>C	ANK3	UTR3	UCEC	AAAAGA	+	PABPN1	Loss	1	530	0.00188679245283019
10	60029382	A>C	ANK3	UTR3	UCEC	AAAAGAA	+	SRSF10	Loss	1	530	0.00188679245283019
10	60029382	A>C	ANK3	UTR3	UCEC	AAAGAAA	+	SRSF10	Loss	1	530	0.00188679245283019
10	60029382	T>G	ANK3	UTR3	UCEC	CTTTTT	-	ELAVL2	Loss	1	530	0.00188679245283019
10	60029382	T>G	ANK3	UTR3	UCEC	CTTTTTT	-	HNRNPC,HNRNPCL1,CPEB2,PTBP1,CPEB2,CPEB4,tiar1,tiar3,CPEB2,CPEB4	Loss	1	530	0.00188679245283019
10	60029382	T>G	ANK3	UTR3	UCEC	GTTTAAA	-	DAZ3	Gain	1	530	0.00188679245283019
10	60029382	A>C	ANK3	UTR3	UCEC	TAAAAA	+	PPIE	Loss	1	530	0.00188679245283019
10	60029382	T>G	ANK3	UTR3	UCEC	TCTTGT	-	ZFP36	Gain	1	530	0.00188679245283019
10	60029382	T>G	ANK3	UTR3	UCEC	TCTTTT	-	ZFP36	Loss	1	530	0.00188679245283019
10	60029382	T>G	ANK3	UTR3	UCEC	TCTTTTT	-	PTBP1	Loss	1	530	0.00188679245283019
10	60029382	A>C	ANK3	UTR3	UCEC	TTAAAA	+	KHDRBS1,PPIE	Loss	1	530	0.00188679245283019
10	60029382	T>G	ANK3	UTR3	UCEC	TTCTTG	-	PTBP1	Gain	1	530	0.00188679245283019
10	60029382	T>G	ANK3	UTR3	UCEC	TTCTTT	-	PTBP1	Loss	1	530	0.00188679245283019
10	60029382	T>G	ANK3	UTR3	UCEC	TTCTTTT	-	PTBP1	Loss	1	530	0.00188679245283019
10	60029382	T>G	ANK3	UTR3	UCEC	TTTCTTT	-	PTBP1,RALYL	Loss	1	530	0.00188679245283019
10	60029382	T>G	ANK3	UTR3	UCEC	TTTTAA	-	PPIE	Loss	1	530	0.00188679245283019
10	60029382	T>G	ANK3	UTR3	UCEC	TTTTTA	-	PPIE,HNRNPC	Loss	1	530	0.00188679245283019
10	60029382	T>G	ANK3	UTR3	UCEC	TTTTTT	-	KHDRBS1,HNRNPC,DDX19B,EIF4A3,PPIE,CPEB4	Loss	1	530	0.00188679245283019
10	60029382	T>G	ANK3	UTR3	UCEC	TTTTTTA	-	CPEB1	Loss	1	530	0.00188679245283019
10	60029704	A>-	ANK3	UTR3	UCEC	AAAAAA	+	PPIE	Loss	1	530	0.00188679245283019
10	60029704	A>-	ANK3	UTR3	UCEC	AAAAAAA	+	ELAVL4,PCBP1,SYNCRIP,HNRNPU,FMR1,RBM5,IGHMBP2,PABPC4,FUS,HNRNPD,SART3,HNRNPK,PABPC1,DAZAP1,HNRNPA1,LmjF354130,PABPC4,PABPC4	Loss	1	530	0.00188679245283019
10	60029704	A>-	ANK3	UTR3	UCEC	AAAAAAAA	+	IGHMBP2,PABPC1	Loss	1	530	0.00188679245283019
10	60029704	T>-	ANK3	UTR3	UCEC	ATTTTTTTA	-	ELAVL2	Gain	1	530	0.00188679245283019
10	60029704	T>-	ANK3	UTR3	UCEC	TTTTTT	-	KHDRBS1,HNRNPC,DDX19B,EIF4A3,PPIE,CPEB4	Loss	1	530	0.00188679245283019
10	60029704	T>-	ANK3	UTR3	UCEC	TTTTTTT	-	DAZAP1,TIA1,ELAVL1,ELAVL4,PCBP1,U2AF2,HNRNPCL1,HNRNPA1,HNRNPC,FUS,NOVA1,SFPQ,NOVA2,KHDRBS2,PCBP2,RALY,KHDRBS1,FMR1,ELAVL3,KHDRBS3,HNRNPU,DDX19B,HNRNPK,SYNCRIP,PTBP1,egw103003671,ELAVL1,gw184451,HNRNPC,HNRNPCL1,PUF60,Sxl,TVAG514790	Loss	1	530	0.00188679245283019
10	60029769	G>T	ANK3	UTR3	UCEC	AATTAA	-	PPIE	Gain	1	530	0.00188679245283019
10	60029769	C>A	ANK3	UTR3	UCEC	ACTTCC	+	ZFP36	Loss	1	530	0.00188679245283019
10	60029769	G>T	ANK3	UTR3	UCEC	ATTAAA	-	PPIE	Gain	1	530	0.00188679245283019
10	60029769	G>T	ANK3	UTR3	UCEC	GAATTA	-	TRA2B*	Gain	1	530	0.00188679245283019
10	60029769	G>T	ANK3	UTR3	UCEC	GAATTAA	-	ZCRB1	Gain	1	530	0.00188679245283019
10	60029769	G>T	ANK3	UTR3	UCEC	TTAAAA	-	KHDRBS1,PPIE	Gain	1	530	0.00188679245283019
10	60029769	C>A	ANK3	UTR3	UCEC	TTAATT	+	PPIE	Gain	1	530	0.00188679245283019
10	60029769	C>A	ANK3	UTR3	UCEC	TTTAAT	+	PPIE	Gain	1	530	0.00188679245283019
10	60029769	C>A	ANK3	UTR3	UCEC	TTTAATT	+	RBM15B	Gain	1	530	0.00188679245283019
10	60029769	C>A	ANK3	UTR3	UCEC	TTTTAA	+	PPIE	Gain	1	530	0.00188679245283019
10	60029769	C>A	ANK3	UTR3	UCEC	TTTTAC	+	KHDRBS1	Loss	1	530	0.00188679245283019
10	60029792	G>A	ANK3	UTR3	UCEC	AAATTT	+	PPIE	Gain	2	530	0.00377358490566038
10	60029792	C>T	ANK3	UTR3	UCEC	AAATTT	-	PPIE	Gain	2	530	0.00377358490566038
10	60029792	C>T	ANK3	UTR3	UCEC	GAAATTT	-	CG17838	Gain	2	530	0.00377358490566038
10	60029792	C>T	ANK3	UTR3	UCEC	TGTGGA	-	SRSF6	Gain	2	530	0.00377358490566038
10	60029792	C>T	ANK3	UTR3	UCEC	TTGTGG	-	ZFP36	Gain	2	530	0.00377358490566038
10	60084486	T>G	ANK3	intronic	UCEC	ACTTTT	-	ZFP36	Loss	1	530	0.00188679245283019
10	60084486	T>G	ANK3	intronic	UCEC	CTTTTA	-	ELAVL2,TIAL1,TIA1	Loss	1	530	0.00188679245283019
10	60084486	T>G	ANK3	intronic	UCEC	TTACTTT	-	PTBP1,RBM41,RBM41	Loss	1	530	0.00188679245283019
10	60084486	T>G	ANK3	intronic	UCEC	TTTTAC	-	KHDRBS1	Loss	1	530	0.00188679245283019
10	60084577	G>T	ANK3	intronic	UCEC	AAATTA	+	PPIE	Gain	1	530	0.00188679245283019
10	60084577	G>T	ANK3	intronic	UCEC	AAATTAA	+	KHDRBS2	Gain	1	530	0.00188679245283019
10	60084577	G>T	ANK3	intronic	UCEC	AATGAAC	+	PRR3	Loss	1	530	0.00188679245283019
10	60084577	G>T	ANK3	intronic	UCEC	AATTAA	+	PPIE	Gain	1	530	0.00188679245283019
10	60084577	G>T	ANK3	intronic	UCEC	ATTAAC	+	QKI,SF1	Gain	1	530	0.00188679245283019
10	60084577	C>A	ANK3	intronic	UCEC	CAAGTTA	-	DAZ3	Gain	1	530	0.00188679245283019
10	60084577	C>A	ANK3	intronic	UCEC	TAATTT	-	PPIE	Gain	1	530	0.00188679245283019
10	60084577	C>A	ANK3	intronic	UCEC	TTAATT	-	PPIE	Gain	1	530	0.00188679245283019
10	60084577	C>A	ANK3	intronic	UCEC	TTAATTT	-	SFPQ	Gain	1	530	0.00188679245283019
10	60196125	GGCTGTGGAATTATAGGTACCTTTGC>-	ANK3	intronic	UCEC	AATTAT	+	PPIE	Loss	1	530	0.00188679245283019
10	60196125	GGCTGTGGAATTATAGGTACCTTTGC>-	ANK3	intronic	UCEC	ACCTTT	+	ZFP36	Loss	1	530	0.00188679245283019
10	60196125	GGCTGTGGAATTATAGGTACCTTTGC>-	ANK3	intronic	UCEC	AGGTAC	+	ZRANB2	Loss	1	530	0.00188679245283019
10	60196125	GCAAAGGTACCTATAATTCCACAGCC>-	ANK3	intronic	UCEC	AGGTAC	-	ZRANB2	Loss	1	530	0.00188679245283019
10	60196125	GCAAAGGTACCTATAATTCCACAGCC>-	ANK3	intronic	UCEC	ATAATT	-	PPIE	Loss	1	530	0.00188679245283019
10	60196125	GGCTGTGGAATTATAGGTACCTTTGC>-	ANK3	intronic	UCEC	ATTATA	+	PPIE	Loss	1	530	0.00188679245283019
10	60196125	GCAAAGGTACCTATAATTCCACAGCC>-	ANK3	intronic	UCEC	CACAGC	-	SRSF5	Loss	1	530	0.00188679245283019
10	60196125	GGCTGTGGAATTATAGGTACCTTTGC>-	ANK3	intronic	UCEC	GAATTA	+	TRA2B*	Loss	1	530	0.00188679245283019
10	60196125	GGCTGTGGAATTATAGGTACCTTTGC>-	ANK3	intronic	UCEC	TAGGTA	+	KHSRP,HNRNPA1	Loss	1	530	0.00188679245283019
10	60196125	GCAAAGGTACCTATAATTCCACAGCC>-	ANK3	intronic	UCEC	TATAAT	-	PPIE	Loss	1	530	0.00188679245283019
10	60196125	GGCTGTGGAATTATAGGTACCTTTGC>-	ANK3	intronic	UCEC	TGCGGC	+	SRSF5,SRSF6	Loss	1	530	0.00188679245283019
10	60196125	GGCTGTGGAATTATAGGTACCTTTGC>-	ANK3	intronic	UCEC	TGTGGA	+	SRSF6	Loss	1	530	0.00188679245283019
10	60200233	G>T	ANK3	intronic	UCEC	GGGTAA	+	ZRANB2	Gain	1	530	0.00188679245283019
10	60200233	C>A	ANK3	intronic	UCEC	TCCCCA	-	PCBP2	Loss	1	530	0.00188679245283019
10	60200233	G>T	ANK3	intronic	UCEC	TGGGGAA	+	ESRP2	Loss	1	530	0.00188679245283019
10	68691873	T>G	TET1	UTR3	UCEC	GCTGGTA	+	SAMD4A	Gain	2	530	0.00377358490566038
10	68691873	T>G	TET1	UTR3	UCEC	TGCTGTT	+	SRSF2	Loss	2	530	0.00377358490566038
10	68691873	T>G	TET1	UTR3	UCEC	TGGTAA	+	ZRANB2	Gain	2	530	0.00377358490566038
10	68691873	T>G	TET1	UTR3	UCEC	TTAAAA	+	KHDRBS1,PPIE	Loss	2	530	0.00377358490566038
10	68691873	A>C	TET1	UTR3	UCEC	TTTTAA	-	PPIE	Loss	2	530	0.00377358490566038
10	68691873	A>C	TET1	UTR3	UCEC	TTTTAC	-	KHDRBS1	Gain	2	530	0.00377358490566038
10	68691931	->A	TET1	UTR3	UCEC	AGGATAA	+	G3BP2	Gain	1	530	0.00188679245283019
10	68691931	->A	TET1	UTR3	UCEC	AGGTAA	+	ZRANB2,RBM5,ZRANB2	Loss	1	530	0.00188679245283019
10	68691931	->A	TET1	UTR3	UCEC	ATAAAA	+	KHDRBS3,PPIE,KHDRBS1	Gain	1	530	0.00188679245283019
10	68691931	->A	TET1	UTR3	UCEC	ATAAAAA	+	KHDRBS1	Gain	1	530	0.00188679245283019
10	68691931	->A	TET1	UTR3	UCEC	GATAAAA	+	KHDRBS2	Gain	1	530	0.00188679245283019
10	68691931	->T	TET1	UTR3	UCEC	TTTTAC	-	KHDRBS1	Loss	1	530	0.00188679245283019
10	68691931	->T	TET1	UTR3	UCEC	TTTTAT	-	PPIE	Gain	1	530	0.00188679245283019
10	68691990	T>C	TET1	UTR3	UCEC	TCAAAA	-	RBMX	Loss	1	530	0.00188679245283019
10	68691990	T>C	TET1	UTR3	UCEC	TTGCCA	-	MBNL1	Gain	1	530	0.00188679245283019
10	68692029	C>A	TET1	UTR3	UCEC	AAAAAT	-	PPIE	Gain	1	530	0.00188679245283019
10	68692029	G>T	TET1	UTR3	UCEC	AAAATT	+	PPIE	Gain	1	530	0.00188679245283019
10	68692029	C>A	TET1	UTR3	UCEC	AAAATT	-	PPIE	Gain	1	530	0.00188679245283019
10	68692029	G>T	TET1	UTR3	UCEC	AAATTT	+	PPIE	Gain	1	530	0.00188679245283019
10	68692029	C>A	TET1	UTR3	UCEC	AAATTT	-	PPIE	Gain	1	530	0.00188679245283019
10	68692029	G>T	TET1	UTR3	UCEC	AATTTT	+	PPIE	Gain	1	530	0.00188679245283019
10	68692029	C>A	TET1	UTR3	UCEC	AATTTT	-	PPIE	Gain	1	530	0.00188679245283019
10	68692029	C>A	TET1	UTR3	UCEC	ACTTTT	-	ZFP36	Loss	1	530	0.00188679245283019
10	68692029	C>A	TET1	UTR3	UCEC	ATAAAAA	-	KHDRBS1	Gain	1	530	0.00188679245283019
10	68692029	C>A	TET1	UTR3	UCEC	ATAAAAC	-	KHDRBS3,KHDRBS1	Loss	1	530	0.00188679245283019
10	68692029	G>T	TET1	UTR3	UCEC	ATAAAAG	+	KHDRBS1	Loss	1	530	0.00188679245283019
10	68692029	C>A	TET1	UTR3	UCEC	ATTTTA	-	PPIE,TIAL1,KHSRP	Gain	1	530	0.00188679245283019
10	68692029	G>T	TET1	UTR3	UCEC	ATTTTT	+	PPIE	Gain	1	530	0.00188679245283019
10	68692029	G>T	TET1	UTR3	UCEC	ATTTTTA	+	ELAVL2,TIAL1,TRNAU1AP	Gain	1	530	0.00188679245283019
10	68692029	C>A	TET1	UTR3	UCEC	CTTTTA	-	ELAVL2,TIAL1,TIA1	Loss	1	530	0.00188679245283019
10	68692029	G>T	TET1	UTR3	UCEC	GTTTTA	+	TIA1	Loss	1	530	0.00188679245283019
10	68692029	C>A	TET1	UTR3	UCEC	TAAAAA	-	PPIE	Gain	1	530	0.00188679245283019
10	68692029	G>T	TET1	UTR3	UCEC	TAAAAT	+	PPIE	Gain	1	530	0.00188679245283019
10	68692029	G>T	TET1	UTR3	UCEC	TTTTTA	+	PPIE,HNRNPC	Gain	1	530	0.00188679245283019
10	68692032	A>C	TET1	UTR3	UCEC	ATAAAA	-	KHDRBS3,PPIE,KHDRBS1	Loss	1	530	0.00188679245283019
10	68692032	A>C	TET1	UTR3	UCEC	ATAAAAC	-	KHDRBS3,KHDRBS1	Loss	1	530	0.00188679245283019
10	68692032	T>G	TET1	UTR3	UCEC	GTTTTA	+	TIA1	Loss	1	530	0.00188679245283019
10	68692032	A>C	TET1	UTR3	UCEC	TATAAA	-	PPIE	Loss	1	530	0.00188679245283019
10	68692032	T>G	TET1	UTR3	UCEC	TTTATA	+	PPIE,HNRNPA2B1,HNRNPA1	Loss	1	530	0.00188679245283019
10	68692032	T>G	TET1	UTR3	UCEC	TTTTAT	+	PPIE	Loss	1	530	0.00188679245283019
10	68692077	G>T	TET1	UTR3	UCEC	AGGTTA	-	ZRANB2	Loss	1	530	0.00188679245283019
10	68692077	C>A	TET1	UTR3	UCEC	ATTAACA	+	SF1	Gain	1	530	0.00188679245283019
10	68692077	G>T	TET1	UTR3	UCEC	GGTTAATG	-	SRSF2	Loss	1	530	0.00188679245283019
10	68692135	C>A	TET1	UTR3	UCEC	AATCTTG	-	MATR3	Gain	1	530	0.00188679245283019
10	68692135	C>A	TET1	UTR3	UCEC	AATGAAT	-	RBM46	Gain	1	530	0.00188679245283019
10	68692135	C>A	TET1	UTR3	UCEC	CTCTTG	-	PTBP1	Loss	1	530	0.00188679245283019
10	68692135	G>T	TET1	UTR3	UCEC	GAGTCAT	+	NOVA2	Loss	1	530	0.00188679245283019
10	68692137	G>A	TET1	UTR3	UCEC	AAAAATA	-	NUPL2,PABPN1L	Gain	1	530	0.00188679245283019
10	68692137	G>A	TET1	UTR3	UCEC	AAAATA	-	PPIE	Gain	1	530	0.00188679245283019
10	68692137	G>A	TET1	UTR3	UCEC	AAATAA	-	PPIE	Gain	1	530	0.00188679245283019
10	68692137	C>T	TET1	UTR3	UCEC	CATTTTT	+	CPEB2,HNRNPC,RALYL	Loss	1	530	0.00188679245283019
10	68692137	C>T	TET1	UTR3	UCEC	GAGTCAT	+	NOVA2	Loss	1	530	0.00188679245283019
10	68692137	C>T	TET1	UTR3	UCEC	TATTTT	+	PPIE	Gain	1	530	0.00188679245283019
10	68692137	C>T	TET1	UTR3	UCEC	TATTTTT	+	TRNAU1AP	Gain	1	530	0.00188679245283019
10	68692137	C>T	TET1	UTR3	UCEC	TTATTT	+	PPIE	Gain	1	530	0.00188679245283019
10	68692137	C>T	TET1	UTR3	UCEC	TTATTTT	+	ELAVL1,BOLL,ELAVL1	Gain	1	530	0.00188679245283019
10	68692360	G>T	TET1	UTR3	UCEC	AGGAGA	-	SRSF1	Loss	1	530	0.00188679245283019
10	68692360	G>T	TET1	UTR3	UCEC	AGGAGAA	-	LIN28A,SRSF9,SRSF2	Loss	1	530	0.00188679245283019
10	68692360	G>T	TET1	UTR3	UCEC	AGGATAA	-	G3BP2	Gain	1	530	0.00188679245283019
10	68692360	G>T	TET1	UTR3	UCEC	ATAAAT	-	PPIE	Gain	1	530	0.00188679245283019
10	68692360	C>A	TET1	UTR3	UCEC	ATATTTA	+	shep,sup26CONSTRUCT	Gain	1	530	0.00188679245283019
10	68692360	C>A	TET1	UTR3	UCEC	ATTTAT	+	PPIE	Gain	1	530	0.00188679245283019
10	68692360	G>T	TET1	UTR3	UCEC	GGAGAA	-	SRSF2	Loss	1	530	0.00188679245283019
10	68692360	G>T	TET1	UTR3	UCEC	TAAATA	-	PPIE	Gain	1	530	0.00188679245283019
10	68692360	C>A	TET1	UTR3	UCEC	TATTTA	+	PPIE,KHSRP	Gain	1	530	0.00188679245283019
10	68692360	C>A	TET1	UTR3	UCEC	TATTTAT	+	ZFP36	Gain	1	530	0.00188679245283019
10	68692468	T>C	TET1	UTR3	UCEC	AATAAT	+	PPIE,KHDRBS3	Loss	1	530	0.00188679245283019
10	68692468	T>C	TET1	UTR3	UCEC	AATATA	+	RBMS3,PPIE	Loss	1	530	0.00188679245283019
10	68692468	T>C	TET1	UTR3	UCEC	ATAATA	+	PPIE	Loss	1	530	0.00188679245283019
10	68692468	A>G	TET1	UTR3	UCEC	ATATTA	-	PPIE	Loss	1	530	0.00188679245283019
10	68692468	A>G	TET1	UTR3	UCEC	ATTATT	-	PPIE	Loss	1	530	0.00188679245283019
10	68692468	T>C	TET1	UTR3	UCEC	TAATAT	+	PPIE	Loss	1	530	0.00188679245283019
10	68692468	A>G	TET1	UTR3	UCEC	TATATT	-	PPIE	Loss	1	530	0.00188679245283019
10	68692468	A>G	TET1	UTR3	UCEC	TATATTA	-	RC3H1,shep	Loss	1	530	0.00188679245283019
10	68692468	A>G	TET1	UTR3	UCEC	TATGTT	-	CELF2	Gain	1	530	0.00188679245283019
10	68692468	A>G	TET1	UTR3	UCEC	TATTAT	-	PPIE,KHSRP	Loss	1	530	0.00188679245283019
10	68692468	A>G	TET1	UTR3	UCEC	TATTATT	-	ELAVL4	Loss	1	530	0.00188679245283019
10	68692468	A>G	TET1	UTR3	UCEC	TGTTATT	-	KHSRP	Gain	1	530	0.00188679245283019
10	68692489	A>C	TET1	UTR3	UCEC	AGACAA	-	SRSF10	Loss	1	530	0.00188679245283019
10	68692489	A>C	TET1	UTR3	UCEC	TAGACA	-	HNRNPA2B1,HNRNPA1	Loss	1	530	0.00188679245283019
10	68692524	C>A	TET1	UTR3	UCEC	AAATAA	+	PPIE	Gain	2	530	0.00377358490566038
10	68692524	G>T	TET1	UTR3	UCEC	AAATTA	-	PPIE	Gain	2	530	0.00377358490566038
10	68692524	G>T	TET1	UTR3	UCEC	AAATTAT	-	RBM47	Gain	2	530	0.00377358490566038
10	68692524	C>A	TET1	UTR3	UCEC	AATAAT	+	PPIE,KHDRBS3	Gain	2	530	0.00377358490566038
10	68692524	C>A	TET1	UTR3	UCEC	AATCATT	+	RBM46	Loss	2	530	0.00377358490566038
10	68692524	G>T	TET1	UTR3	UCEC	AATGATT	-	RBM46	Loss	2	530	0.00377358490566038
10	68692524	G>T	TET1	UTR3	UCEC	AATTAT	-	PPIE	Gain	2	530	0.00377358490566038
10	68692524	C>A	TET1	UTR3	UCEC	AATTTA	+	HNRNPDL,DAZAP1,HNRNPA2B1,HNRNPD,HNRNPA1,HNRNPA0,PPIE	Gain	2	530	0.00377358490566038
10	68692524	C>A	TET1	UTR3	UCEC	ATAATT	+	PPIE	Gain	2	530	0.00377358490566038
10	68692524	G>T	TET1	UTR3	UCEC	ATTATT	-	PPIE	Gain	2	530	0.00377358490566038
10	68692524	C>A	TET1	UTR3	UCEC	GAAATCA	+	IGF2BP2	Loss	2	530	0.00377358490566038
10	68692524	G>T	TET1	UTR3	UCEC	TAAATT	-	PPIE	Gain	2	530	0.00377358490566038
10	68692524	C>A	TET1	UTR3	UCEC	TAATTT	+	PPIE	Gain	2	530	0.00377358490566038
10	68692524	G>T	TET1	UTR3	UCEC	TTATTT	-	PPIE	Gain	2	530	0.00377358490566038
10	68692549	C>A	TET1	UTR3	UCEC	AATCTTG	+	MATR3	Gain	1	530	0.00188679245283019
10	68692549	C>A	TET1	UTR3	UCEC	CATCTTG	+	MATR3	Loss	1	530	0.00188679245283019
10	68693252	G>A	TET1	UTR3	UCEC	CAAAACA	-	IGF2BP2	Gain	1	530	0.00188679245283019
10	68693252	C>T	TET1	UTR3	UCEC	GTTTTG	+	TIA1	Gain	1	530	0.00188679245283019
10	68693252	G>A	TET1	UTR3	UCEC	TCAAAA	-	RBMX	Gain	1	530	0.00188679245283019
10	68693262	C>A	TET1	UTR3	UCEC	AAATTA	-	PPIE	Gain	1	530	0.00188679245283019
10	68693262	C>A	TET1	UTR3	UCEC	AAATTAT	-	RBM47	Gain	1	530	0.00188679245283019
10	68693262	C>A	TET1	UTR3	UCEC	AATTAT	-	PPIE	Gain	1	530	0.00188679245283019
10	68693262	G>T	TET1	UTR3	UCEC	AGGAGA	+	SRSF1	Loss	1	530	0.00188679245283019
10	68693262	G>T	TET1	UTR3	UCEC	AGGAGAA	+	LIN28A,SRSF9,SRSF2	Loss	1	530	0.00188679245283019
10	68693262	G>T	TET1	UTR3	UCEC	AGGATAA	+	G3BP2	Gain	1	530	0.00188679245283019
10	68693262	G>T	TET1	UTR3	UCEC	ATAATT	+	PPIE	Gain	1	530	0.00188679245283019
10	68693262	G>T	TET1	UTR3	UCEC	CAAGGAG	+	RBM5	Loss	1	530	0.00188679245283019
10	68693262	G>T	TET1	UTR3	UCEC	GGAGAA	+	SRSF2	Loss	1	530	0.00188679245283019
10	68693262	G>T	TET1	UTR3	UCEC	TAATTT	+	PPIE	Gain	1	530	0.00188679245283019
10	68693286	G>T	TET1	UTR3	UCEC	TAATCAA	-	RBM47	Gain	1	530	0.00188679245283019
10	68693286	C>A	TET1	UTR3	UCEC	TATGTT	+	CELF2	Gain	1	530	0.00188679245283019
10	68693430	G>T	TET1	UTR3	UCEC	CCTGCTGT	-	MBNL1	Gain	1	530	0.00188679245283019
10	68693430	G>T	TET1	UTR3	UCEC	GCTGGAA	-	SAMD4A	Loss	1	530	0.00188679245283019
10	68693430	C>A	TET1	UTR3	UCEC	GTTCCAG	+	SRSF2	Loss	1	530	0.00188679245283019
10	68693430	C>A	TET1	UTR3	UCEC	TACAGC	+	SRSF5	Gain	1	530	0.00188679245283019
10	68693454	T>G	TET1	UTR3	UCEC	AAACTCA	+	IGF2BP2,IGF2BP3	Loss	1	530	0.00188679245283019
10	68693497	A>C	TET1	UTR3	UCEC	CAAAACA	-	IGF2BP2	Loss	1	530	0.00188679245283019
10	68693497	A>C	TET1	UTR3	UCEC	CAACACA	-	IGF2BP2	Gain	1	530	0.00188679245283019
10	68693497	A>C	TET1	UTR3	UCEC	CACAGA	-	SRSF5	Gain	1	530	0.00188679245283019
10	68693497	T>G	TET1	UTR3	UCEC	GTTTTG	+	TIA1	Loss	1	530	0.00188679245283019
10	68693497	A>C	TET1	UTR3	UCEC	TCAAAA	-	RBMX	Loss	1	530	0.00188679245283019
10	68693497	A>C	TET1	UTR3	UCEC	TCAACA	-	SRSF7	Gain	1	530	0.00188679245283019
10	68693497	T>G	TET1	UTR3	UCEC	TGTGTTG	+	CELF4,CELF5,CELF6	Gain	1	530	0.00188679245283019
10	87864551	GCAGAAATGGAT>-	PTEN	intronic	UCEC	CACAGGT	-	SRSF1	Gain	1	530	0.00188679245283019
10	87864551	GCAGAAATGGAT>-	PTEN	intronic	UCEC	CCACAGG	-	SRSF6	Gain	1	530	0.00188679245283019
10	87864551	GCAGAAATGGAT>-	PTEN	intronic	UCEC	CGCAGA	-	SRSF5	Loss	1	530	0.00188679245283019
10	87864551	GCAGAAATGGAT>-	PTEN	intronic	UCEC	GGATAC	-	HNRNPC,SRSF1,YTHDC1	Loss	1	530	0.00188679245283019
10	87864551	ATCCATTTCTGC>-	PTEN	intronic	UCEC	TGCGGC	+	SRSF5,SRSF6	Loss	1	530	0.00188679245283019
10	87894023	AG>-	PTEN	splicing	UCEC	AGATAT	+	HNRNPA1,HNRNPD,HNRNPA2B1,DAZAP1,HNRNPA0,HNRNPDL	Loss	2	530	0.00377358490566038
10	87894023	A>C	PTEN	splicing	UCEC	AGATAT	+	HNRNPA1,HNRNPD,HNRNPA2B1,DAZAP1,HNRNPA0,HNRNPDL	Loss	1	530	0.00188679245283019
10	87894023	T>G	PTEN	splicing	UCEC	CGGAGTA	-	LIN28A	Gain	1	530	0.00188679245283019
10	87894023	T>G	PTEN	splicing	UCEC	GGAGTA	-	SRSF2	Gain	1	530	0.00188679245283019
10	87894110	G>A	PTEN	splicing	UCEC	AGGTAA	+	ZRANB2,RBM5,ZRANB2	Loss	3	530	0.00566037735849057
10	87925558	TTAC>-	PTEN	splicing	UCEC	ACATACA	-	IGF2BP3,HNRNPLL,HNRNPL,IGF2BP2,HNRNPL	Gain	1	530	0.00188679245283019
10	87925558	GTAA>-	PTEN	splicing	UCEC	AGTATGT	+	TARDBP	Loss	1	530	0.00188679245283019
10	87925558	TTAC>-	PTEN	splicing	UCEC	CATACAG	-	ENOX1	Gain	1	530	0.00188679245283019
10	87925558	GTAA>-	PTEN	splicing	UCEC	CTGTATGT	+	KHSRP	Gain	1	530	0.00188679245283019
10	87925558	GTAA>-	PTEN	splicing	UCEC	TGTAAGT	+	SFPQ	Loss	1	530	0.00188679245283019
10	87931041	GCACAACTAAA>-	PTEN	intronic	UCEC	AAAAGA	-	PABPN1	Loss	1	530	0.00188679245283019
10	87931041	GCACAACTAAA>-	PTEN	intronic	UCEC	AAAAGAA	-	SRSF10	Loss	1	530	0.00188679245283019
10	87931041	GCACAACTAAA>-	PTEN	intronic	UCEC	AAAGAAA	-	SRSF10	Loss	1	530	0.00188679245283019
10	87931041	GCACAACTAAA>-	PTEN	intronic	UCEC	CTAAAA	-	KHDRBS1	Loss	1	530	0.00188679245283019
10	87931041	TTTAGTTGTGC>-	PTEN	intronic	UCEC	CTTTTA	+	ELAVL2,TIAL1,TIA1	Loss	1	530	0.00188679245283019
10	87931041	TTTAGTTGTGC>-	PTEN	intronic	UCEC	GTGCTG	+	MBNL1	Loss	1	530	0.00188679245283019
10	87931041	TTTAGTTGTGC>-	PTEN	intronic	UCEC	GTTGTGC	+	TARDBP	Loss	1	530	0.00188679245283019
10	87931041	TTTAGTTGTGC>-	PTEN	intronic	UCEC	TCTTTT	+	ZFP36	Loss	1	530	0.00188679245283019
10	87931041	TTTAGTTGTGC>-	PTEN	intronic	UCEC	TTAGTTG	+	SFPQ	Loss	1	530	0.00188679245283019
10	87931041	TTTAGTTGTGC>-	PTEN	intronic	UCEC	TTCTTG	+	PTBP1	Gain	1	530	0.00188679245283019
10	87931041	TTTAGTTGTGC>-	PTEN	intronic	UCEC	TTCTTT	+	PTBP1	Loss	1	530	0.00188679245283019
10	87931041	TTTAGTTGTGC>-	PTEN	intronic	UCEC	TTCTTTT	+	PTBP1	Loss	1	530	0.00188679245283019
10	87931041	TTTAGTTGTGC>-	PTEN	intronic	UCEC	TTGTGC	+	ZFP36	Loss	1	530	0.00188679245283019
10	87931041	TTTAGTTGTGC>-	PTEN	intronic	UCEC	TTTAGTT	+	ELAVL1,fne	Loss	1	530	0.00188679245283019
10	87931041	TTTAGTTGTGC>-	PTEN	intronic	UCEC	TTTCTTT	+	PTBP1,RALYL	Loss	1	530	0.00188679245283019
10	87931044	T>C	PTEN	splicing	UCEC	ACCAAA	-	RBMX	Gain	1	530	0.00188679245283019
10	87931044	T>C	PTEN	splicing	UCEC	CTAAAA	-	KHDRBS1	Loss	1	530	0.00188679245283019
10	87931044	A>G	PTEN	splicing	UCEC	CTTTTA	+	ELAVL2,TIAL1,TIA1	Loss	1	530	0.00188679245283019
10	87931044	A>G	PTEN	splicing	UCEC	CTTTTG	+	TIAL1,TIA1	Gain	1	530	0.00188679245283019
10	87931044	A>G	PTEN	splicing	UCEC	TTAGTTG	+	SFPQ	Loss	1	530	0.00188679245283019
10	87931044	A>G	PTEN	splicing	UCEC	TTGGTTG	+	SFPQ	Gain	1	530	0.00188679245283019
10	87931044	A>G	PTEN	splicing	UCEC	TTTAGTT	+	ELAVL1,fne	Loss	1	530	0.00188679245283019
10	87931044	A>G	PTEN	splicing	UCEC	TTTGGTT	+	ELAVL1,Rbp9	Gain	1	530	0.00188679245283019
10	87931045	C>T	PTEN	splicing	UCEC	AATTAA	-	PPIE	Gain	1	530	0.00188679245283019
10	87931045	C>T	PTEN	splicing	UCEC	ATTAAA	-	PPIE	Gain	1	530	0.00188679245283019
10	87931045	C>T	PTEN	splicing	UCEC	CAATTAAA	-	PCBP1,PCBP2	Gain	1	530	0.00188679245283019
10	87931045	C>T	PTEN	splicing	UCEC	CTAAAA	-	KHDRBS1	Loss	1	530	0.00188679245283019
10	87931045	G>A	PTEN	splicing	UCEC	GTTGTGC	+	TARDBP	Loss	1	530	0.00188679245283019
10	87931045	C>T	PTEN	splicing	UCEC	TTAAAA	-	KHDRBS1,PPIE	Gain	1	530	0.00188679245283019
10	87931045	G>A	PTEN	splicing	UCEC	TTAATT	+	PPIE	Gain	1	530	0.00188679245283019
10	87931045	G>A	PTEN	splicing	UCEC	TTAATTG	+	SFPQ,A1CF	Gain	1	530	0.00188679245283019
10	87931045	G>A	PTEN	splicing	UCEC	TTAGTTG	+	SFPQ	Loss	1	530	0.00188679245283019
10	87931045	G>A	PTEN	splicing	UCEC	TTTAAT	+	PPIE	Gain	1	530	0.00188679245283019
10	87931045	G>A	PTEN	splicing	UCEC	TTTAATT	+	RBM15B	Gain	1	530	0.00188679245283019
10	87931045	G>A	PTEN	splicing	UCEC	TTTAGTT	+	ELAVL1,fne	Loss	1	530	0.00188679245283019
10	87931045	G>A	PTEN	splicing	UCEC	TTTTAA	+	PPIE	Gain	1	530	0.00188679245283019
10	87933011	A>T	PTEN	splicing	UCEC	ACAGTTG	+	DAZ3	Loss	1	530	0.00188679245283019
10	87933011	T>A	PTEN	splicing	UCEC	CAGTGG	-	ACO1	Gain	1	530	0.00188679245283019
10	87933012	G>A	PTEN	splicing	UCEC	ACAGTTG	+	DAZ3	Loss	1	530	0.00188679245283019
10	87933012	G>A	PTEN	splicing	UCEC	ATTGCAC	+	SNRPA,SNRPA,SNRPA,SNRPA,SNRPA,SNRPA	Gain	1	530	0.00188679245283019
10	87933012	C>T	PTEN	splicing	UCEC	TTGTGG	-	ZFP36	Gain	1	530	0.00188679245283019
10	87933252	G>A	PTEN	splicing	UCEC	AAAAGA	+	PABPN1	Gain	1	530	0.00188679245283019
10	87933252	C>T	PTEN	splicing	UCEC	ACCTTT	-	ZFP36	Loss	1	530	0.00188679245283019
10	87933252	C>T	PTEN	splicing	UCEC	ACTTAT	-	SF1,QKI	Gain	1	530	0.00188679245283019
10	87933252	G>A	PTEN	splicing	UCEC	AGGTAA	+	ZRANB2,RBM5,ZRANB2	Loss	1	530	0.00188679245283019
10	87933252	C>T	PTEN	splicing	UCEC	CCTTTT	-	ZFP36	Loss	1	530	0.00188679245283019
10	87933252	C>T	PTEN	splicing	UCEC	CCTTTTT	-	CPEB2,PTBP1	Loss	1	530	0.00188679245283019
10	87933252	C>T	PTEN	splicing	UCEC	TCTTTT	-	ZFP36	Gain	1	530	0.00188679245283019
10	87933252	C>T	PTEN	splicing	UCEC	TCTTTTT	-	PTBP1	Gain	1	530	0.00188679245283019
10	87952260	AAGCACTTAC>-	PTEN	splicing	UCEC	ACTGCA	-	HNRNPDL	Loss	1	530	0.00188679245283019
10	87952260	GTAAGTGCTT>-	PTEN	splicing	UCEC	AGAAATT	+	PABPC5	Gain	1	530	0.00188679245283019
10	87952260	GTAAGTGCTT>-	PTEN	splicing	UCEC	GTGCTT	+	MBNL1	Loss	1	530	0.00188679245283019
10	87952260	AAGCACTTAC>-	PTEN	splicing	UCEC	TACTGC	-	YTHDC1	Loss	1	530	0.00188679245283019
10	87952260	GTAAGTGCTT>-	PTEN	splicing	UCEC	TGCAGA	+	SRSF5	Gain	1	530	0.00188679245283019
10	87957852	G>T	PTEN	splicing	UCEC	AGATCC	+	SRSF2	Loss	2	530	0.00377358490566038
10	87957852	C>A	PTEN	splicing	UCEC	GATCTG	-	YBX1	Loss	2	530	0.00377358490566038
10	87957852	C>A	PTEN	splicing	UCEC	GGATAT	-	SRSF1*,HNRNPC*	Gain	2	530	0.00377358490566038
10	87957852	G>T	PTEN	splicing	UCEC	TGCAGA	+	SRSF5	Loss	2	530	0.00377358490566038
10	87957852	G>T	PTEN	splicing	UCEC	TGCATA	+	SRSF5	Gain	2	530	0.00377358490566038
10	87958021	A>G	PTEN	splicing	UCEC	ACAAACC	-	PABPC1	Loss	1	530	0.00188679245283019
10	87958021	A>G	PTEN	splicing	UCEC	ACCTTT	-	ZFP36	Loss	1	530	0.00188679245283019
10	87958021	T>C	PTEN	splicing	UCEC	AGGTTT	+	ZRANB2	Loss	1	530	0.00188679245283019
10	87960893	G>A	PTEN	splicing	UCEC	AGACAA	+	SRSF10	Gain	1	530	0.00188679245283019
10	87960893	G>A	PTEN	splicing	UCEC	AGACAAA	+	FXR2	Gain	1	530	0.00188679245283019
10	87960893	G>A	PTEN	splicing	UCEC	AGGACA	+	SRSF1	Loss	1	530	0.00188679245283019
10	87960893	G>A	PTEN	splicing	UCEC	AGGACAA	+	SRSF9	Loss	1	530	0.00188679245283019
10	87960893	C>T	PTEN	splicing	UCEC	CTAAAA	-	KHDRBS1	Loss	1	530	0.00188679245283019
10	87960893	G>A	PTEN	splicing	UCEC	GGACAA	+	SRSF1	Loss	1	530	0.00188679245283019
10	87960893	G>A	PTEN	splicing	UCEC	GGACAAA	+	FXR2	Loss	1	530	0.00188679245283019
10	87960893	C>T	PTEN	splicing	UCEC	GTCTTA	-	PTBP1	Gain	1	530	0.00188679245283019
10	87960893	G>A	PTEN	splicing	UCEC	TAAGAC	+	RBMX	Gain	1	530	0.00188679245283019
10	87960893	C>T	PTEN	splicing	UCEC	TTAAAA	-	KHDRBS1,PPIE	Gain	1	530	0.00188679245283019
10	87960893	G>A	PTEN	splicing	UCEC	TTAGGA	+	HNRNPD,PCBP2,PCBP1	Loss	1	530	0.00188679245283019
10	87960893	G>A	PTEN	splicing	UCEC	TTTTAA	+	PPIE	Gain	1	530	0.00188679245283019
10	87961119	C>T	PTEN	splicing	UCEC	ACCTTAAA	-	PCBP1,PCBP2	Loss	4	530	0.00754716981132075
10	87961119	C>T	PTEN	splicing	UCEC	CCTTAAA	-	KHDRBS3	Loss	4	530	0.00754716981132075
10	87965271	AGCTTCACCTAGAGAAAGAAAATT>-	PTEN	intronic	UCEC	AAAATT	-	PPIE	Loss	1	530	0.00188679245283019
10	87965271	AGCTTCACCTAGAGAAAGAAAATT>-	PTEN	intronic	UCEC	AAAGAAA	-	SRSF10	Loss	1	530	0.00188679245283019
10	87965271	AATTTTCTTTCTCTAGGTGAAGCT>-	PTEN	intronic	UCEC	AAATTT	+	PPIE	Loss	1	530	0.00188679245283019
10	87965271	AGCTTCACCTAGAGAAAGAAAATT>-	PTEN	intronic	UCEC	AAATTT	-	PPIE	Loss	1	530	0.00188679245283019
10	87965271	AGCTTCACCTAGAGAAAGAAAATT>-	PTEN	intronic	UCEC	AATTTA	-	HNRNPDL,DAZAP1,HNRNPA2B1,HNRNPD,HNRNPA1,HNRNPA0,PPIE	Loss	1	530	0.00188679245283019
10	87965271	AATTTTCTTTCTCTAGGTGAAGCT>-	PTEN	intronic	UCEC	AATTTT	+	PPIE	Loss	1	530	0.00188679245283019
10	87965271	AGCTTCACCTAGAGAAAGAAAATT>-	PTEN	intronic	UCEC	AGAAAAT	-	PABPC5	Loss	1	530	0.00188679245283019
10	87965271	AGCTTCACCTAGAGAAAGAAAATT>-	PTEN	intronic	UCEC	AGAGAAA	-	SRSF10,Fusip1,Fusip1,Fusip1	Loss	1	530	0.00188679245283019
10	87965271	AGCTTCACCTAGAGAAAGAAAATT>-	PTEN	intronic	UCEC	AGTACAG	-	ENOX1	Loss	1	530	0.00188679245283019
10	87965271	AGCTTCACCTAGAGAAAGAAAATT>-	PTEN	intronic	UCEC	ATTTAA	-	KHDRBS1,HNRNPA1,HNRNPA2B1,PPIE	Loss	1	530	0.00188679245283019
10	87965271	AATTTTCTTTCTCTAGGTGAAGCT>-	PTEN	intronic	UCEC	ATTTTC	+	ELAVL2,TIA1,TIAL1	Loss	1	530	0.00188679245283019
10	87965271	AATTTTCTTTCTCTAGGTGAAGCT>-	PTEN	intronic	UCEC	ATTTTCT	+	PTBP1	Loss	1	530	0.00188679245283019
10	87965271	AGCTTCACCTAGAGAAAGAAAATT>-	PTEN	intronic	UCEC	CTAAAA	-	KHDRBS1	Gain	1	530	0.00188679245283019
10	87965271	AGCTTCACCTAGAGAAAGAAAATT>-	PTEN	intronic	UCEC	CTTCAC	-	SRSF3	Loss	1	530	0.00188679245283019
10	87965271	AGCTTCACCTAGAGAAAGAAAATT>-	PTEN	intronic	UCEC	GAAAGAA	-	SRSF10	Loss	1	530	0.00188679245283019
10	87965271	AATTTTCTTTCTCTAGGTGAAGCT>-	PTEN	intronic	UCEC	TAAATT	+	PPIE	Loss	1	530	0.00188679245283019
10	87965271	AGCTTCACCTAGAGAAAGAAAATT>-	PTEN	intronic	UCEC	TACAGC	-	SRSF5	Loss	1	530	0.00188679245283019
10	87965271	AGCTTCACCTAGAGAAAGAAAATT>-	PTEN	intronic	UCEC	TAGAGA	-	HNRNPA1	Loss	1	530	0.00188679245283019
10	87965271	AATTTTCTTTCTCTAGGTGAAGCT>-	PTEN	intronic	UCEC	TAGTAC	+	YTHDC1	Gain	1	530	0.00188679245283019
10	87965271	AATTTTCTTTCTCTAGGTGAAGCT>-	PTEN	intronic	UCEC	TCTTTC	+	ZFP36	Loss	1	530	0.00188679245283019
10	87965271	AATTTTCTTTCTCTAGGTGAAGCT>-	PTEN	intronic	UCEC	TCTTTCT	+	PTBP1,PTBP3	Loss	1	530	0.00188679245283019
10	87965271	AATTTTCTTTCTCTAGGTGAAGCT>-	PTEN	intronic	UCEC	TGAAGCT	+	SRSF1	Loss	1	530	0.00188679245283019
10	87965271	AGCTTCACCTAGAGAAAGAAAATT>-	PTEN	intronic	UCEC	TTAAAA	-	KHDRBS1,PPIE	Loss	1	530	0.00188679245283019
10	87965271	AATTTTCTTTCTCTAGGTGAAGCT>-	PTEN	intronic	UCEC	TTAAAT	+	KHDRBS1,PPIE	Loss	1	530	0.00188679245283019
10	87965271	AATTTTCTTTCTCTAGGTGAAGCT>-	PTEN	intronic	UCEC	TTAAATT	+	TRNAU1AP	Loss	1	530	0.00188679245283019
10	87965271	AATTTTCTTTCTCTAGGTGAAGCT>-	PTEN	intronic	UCEC	TTCTTT	+	PTBP1	Loss	1	530	0.00188679245283019
10	87965271	AATTTTCTTTCTCTAGGTGAAGCT>-	PTEN	intronic	UCEC	TTTAAA	+	PPIE	Loss	1	530	0.00188679245283019
10	87965271	AGCTTCACCTAGAGAAAGAAAATT>-	PTEN	intronic	UCEC	TTTAAA	-	PPIE	Loss	1	530	0.00188679245283019
10	87965271	AATTTTCTTTCTCTAGGTGAAGCT>-	PTEN	intronic	UCEC	TTTCTCT	+	PUF60	Loss	1	530	0.00188679245283019
10	87965271	AATTTTCTTTCTCTAGGTGAAGCT>-	PTEN	intronic	UCEC	TTTCTTT	+	PTBP1,RALYL	Loss	1	530	0.00188679245283019
10	87965271	AATTTTCTTTCTCTAGGTGAAGCT>-	PTEN	intronic	UCEC	TTTTAA	+	PPIE	Loss	1	530	0.00188679245283019
10	87965271	AATTTTCTTTCTCTAGGTGAAGCT>-	PTEN	intronic	UCEC	TTTTAAATTTT	+	TIAL1	Loss	1	530	0.00188679245283019
10	87965285	A>T	PTEN	splicing	UCEC	CTCTTG	+	PTBP1	Gain	1	530	0.00188679245283019
10	87965285	T>A	PTEN	splicing	UCEC	TAGAGA	-	HNRNPA1	Loss	1	530	0.00188679245283019
10	87965285	A>T	PTEN	splicing	UCEC	TGGTGA	+	FUS	Gain	1	530	0.00188679245283019
10	87965285	A>T	PTEN	splicing	UCEC	TGGTGAA	+	SRSF1	Gain	1	530	0.00188679245283019
10	87965286	C>T	PTEN	splicing	UCEC	TTAGAG	-	HNRNPD,PCBP1,PCBP2	Gain	3	530	0.00566037735849057
10	87965474	A>-	PTEN	UTR3	UCEC	AAAAAA	-	PPIE	Loss	1	530	0.00188679245283019
10	87965474	A>-	PTEN	UTR3	UCEC	AAAAAAA	-	ELAVL4,PCBP1,SYNCRIP,HNRNPU,FMR1,RBM5,IGHMBP2,PABPC4,FUS,HNRNPD,SART3,HNRNPK,PABPC1,DAZAP1,HNRNPA1,LmjF354130,PABPC4,PABPC4	Loss	1	530	0.00188679245283019
10	87965474	A>-	PTEN	UTR3	UCEC	AAAAAAAA	-	IGHMBP2,PABPC1	Loss	1	530	0.00188679245283019
10	87965474	A>-	PTEN	UTR3	UCEC	AAAAAAAAA	-	AGO2	Loss	1	530	0.00188679245283019
10	87965474	T>-	PTEN	UTR3	UCEC	TTTTTT	+	KHDRBS1,HNRNPC,DDX19B,EIF4A3,PPIE,CPEB4	Loss	1	530	0.00188679245283019
10	87965474	T>-	PTEN	UTR3	UCEC	TTTTTTT	+	DAZAP1,TIA1,ELAVL1,ELAVL4,PCBP1,U2AF2,HNRNPCL1,HNRNPA1,HNRNPC,FUS,NOVA1,SFPQ,NOVA2,KHDRBS2,PCBP2,RALY,KHDRBS1,FMR1,ELAVL3,KHDRBS3,HNRNPU,DDX19B,HNRNPK,SYNCRIP,PTBP1,egw103003671,ELAVL1,gw184451,HNRNPC,HNRNPCL1,PUF60,Sxl,TVAG514790	Loss	1	530	0.00188679245283019
10	87965474	T>-	PTEN	UTR3	UCEC	TTTTTTTTT	+	TIA1	Loss	1	530	0.00188679245283019
10	87965525	->ATCAG	PTEN	UTR3	UCEC	AACATC	+	YBX1,ybx2-a,ybx2-a	Gain	1	530	0.00188679245283019
10	87965525	->ATCAG	PTEN	UTR3	UCEC	AACATCA	+	YBX1,YBX2,YB1,YB1,YBX1	Gain	1	530	0.00188679245283019
10	87965525	->ATCAG	PTEN	UTR3	UCEC	CAGTGA	+	ACO1	Gain	1	530	0.00188679245283019
10	87965537	AA>-	PTEN	UTR3	UCEC	AAAAAA	-	PPIE	Loss	5	530	0.00943396226415094
10	87965537	AA>-	PTEN	UTR3	UCEC	AAAAAAA	-	ELAVL4,PCBP1,SYNCRIP,HNRNPU,FMR1,RBM5,IGHMBP2,PABPC4,FUS,HNRNPD,SART3,HNRNPK,PABPC1,DAZAP1,HNRNPA1,LmjF354130,PABPC4,PABPC4	Loss	5	530	0.00943396226415094
10	87965537	AA>-	PTEN	UTR3	UCEC	AAAAAAAA	-	IGHMBP2,PABPC1	Loss	5	530	0.00943396226415094
10	87965537	AA>-	PTEN	UTR3	UCEC	AAAAAAAAA	-	AGO2	Loss	5	530	0.00943396226415094
10	87965537	TT>-	PTEN	UTR3	UCEC	TTTTTT	+	KHDRBS1,HNRNPC,DDX19B,EIF4A3,PPIE,CPEB4	Loss	5	530	0.00943396226415094
10	87965537	TT>-	PTEN	UTR3	UCEC	TTTTTTT	+	DAZAP1,TIA1,ELAVL1,ELAVL4,PCBP1,U2AF2,HNRNPCL1,HNRNPA1,HNRNPC,FUS,NOVA1,SFPQ,NOVA2,KHDRBS2,PCBP2,RALY,KHDRBS1,FMR1,ELAVL3,KHDRBS3,HNRNPU,DDX19B,HNRNPK,SYNCRIP,PTBP1,egw103003671,ELAVL1,gw184451,HNRNPC,HNRNPCL1,PUF60,Sxl,TVAG514790	Loss	5	530	0.00943396226415094
10	87965537	TT>-	PTEN	UTR3	UCEC	TTTTTTTTT	+	TIA1	Loss	5	530	0.00943396226415094
10	87965622	G>A	PTEN	UTR3	UCEC	AGGTAA	-	ZRANB2,RBM5,ZRANB2	Gain	1	530	0.00188679245283019
10	87965622	G>A	PTEN	UTR3	UCEC	ATAGGGT	-	HNRNPA1L2,HNRNPA1,HNRNPA2B1	Loss	1	530	0.00188679245283019
10	87965622	G>A	PTEN	UTR3	UCEC	GGGTAA	-	ZRANB2	Loss	1	530	0.00188679245283019
10	87965622	G>A	PTEN	UTR3	UCEC	GTATAGG	-	EWSR1	Loss	1	530	0.00188679245283019
10	87965622	G>A	PTEN	UTR3	UCEC	TAGGGT	-	HNRNPA1*,HNRNPA1	Loss	1	530	0.00188679245283019
10	87965753	G>A	PTEN	UTR3	UCEC	AGGAAAG	-	SRSF9	Gain	1	530	0.00188679245283019
10	87965753	C>T	PTEN	UTR3	UCEC	CCCGTTT	+	SRSF1	Loss	1	530	0.00188679245283019
10	87965753	C>T	PTEN	UTR3	UCEC	CTTTCCC	+	pcbp2	Loss	1	530	0.00188679245283019
10	87965753	C>T	PTEN	UTR3	UCEC	TCCTGT	+	ZFP36	Gain	1	530	0.00188679245283019
10	87965890	T>G	PTEN	UTR3	UCEC	ACTTGT	+	ZFP36	Loss	1	530	0.00188679245283019
10	87965890	A>C	PTEN	UTR3	UCEC	CACACGT	-	SRSF1	Gain	1	530	0.00188679245283019
10	87965890	A>C	PTEN	UTR3	UCEC	CCACACG	-	SRSF6	Gain	1	530	0.00188679245283019
10	87965890	T>G	PTEN	UTR3	UCEC	TTGCACG	+	SNRPA	Gain	1	530	0.00188679245283019
10	87965890	T>G	PTEN	UTR3	UCEC	TTGTGG	+	ZFP36	Loss	1	530	0.00188679245283019
10	87965951	C>A	PTEN	UTR3	UCEC	ATTATA	+	PPIE	Gain	1	530	0.00188679245283019
10	87965951	G>T	PTEN	UTR3	UCEC	ATTATA	-	PPIE	Gain	1	530	0.00188679245283019
10	87965951	G>T	PTEN	UTR3	UCEC	GAATGT	-	TARDBP	Loss	1	530	0.00188679245283019
10	87965951	C>A	PTEN	UTR3	UCEC	TATAAT	+	PPIE	Gain	1	530	0.00188679245283019
10	87965951	G>T	PTEN	UTR3	UCEC	TATAAT	-	PPIE	Gain	1	530	0.00188679245283019
10	87965951	C>A	PTEN	UTR3	UCEC	TTATAA	+	PPIE	Gain	1	530	0.00188679245283019
10	87965951	G>T	PTEN	UTR3	UCEC	TTATAA	-	PPIE	Gain	1	530	0.00188679245283019
10	87965951	C>A	PTEN	UTR3	UCEC	TTATAAT	+	RBMS3	Gain	1	530	0.00188679245283019
10	87965951	G>T	PTEN	UTR3	UCEC	TTATAAT	-	RBMS3	Gain	1	530	0.00188679245283019
10	87965961	A>T	PTEN	UTR3	UCEC	ATACATG	-	RBM41,MAL8P140	Loss	1	530	0.00188679245283019
10	87965961	A>T	PTEN	UTR3	UCEC	GAATAC	-	YTHDC1,1_YTHDC1	Loss	1	530	0.00188679245283019
10	87965961	A>T	PTEN	UTR3	UCEC	GAATACA	-	IGF2BP2	Loss	1	530	0.00188679245283019
10	87965961	A>T	PTEN	UTR3	UCEC	GAATTCA	-	IGF2BP2	Gain	1	530	0.00188679245283019
10	87965961	A>T	PTEN	UTR3	UCEC	TCATGC	-	YTHDC1	Gain	1	530	0.00188679245283019
10	87965961	T>A	PTEN	UTR3	UCEC	TGCATGA	+	RBFOX1,asd1,fox1	Gain	1	530	0.00188679245283019
10	87965961	T>A	PTEN	UTR3	UCEC	TGCATGT	+	RBFOX1	Loss	1	530	0.00188679245283019
10	87966007	A>C	PTEN	UTR3	UCEC	AAAATT	-	PPIE	Loss	1	530	0.00188679245283019
10	87966007	A>C	PTEN	UTR3	UCEC	AAATTA	-	PPIE	Loss	1	530	0.00188679245283019
10	87966007	A>C	PTEN	UTR3	UCEC	AAATTAT	-	RBM47	Loss	1	530	0.00188679245283019
10	87966007	T>G	PTEN	UTR3	UCEC	AATTTT	+	PPIE	Loss	1	530	0.00188679245283019
10	87966007	A>C	PTEN	UTR3	UCEC	ATAAAA	-	KHDRBS3,PPIE,KHDRBS1	Loss	1	530	0.00188679245283019
10	87966007	T>G	PTEN	UTR3	UCEC	ATAATTG	+	A1CF	Gain	1	530	0.00188679245283019
10	87966007	T>G	PTEN	UTR3	UCEC	ATTTTA	+	PPIE,TIAL1,KHSRP	Loss	1	530	0.00188679245283019
10	87966007	A>C	PTEN	UTR3	UCEC	GCATAA	-	OAS1	Loss	1	530	0.00188679245283019
10	87966007	A>C	PTEN	UTR3	UCEC	GCATAC	-	YTHDC1,SRSF1*,HNRNPC*	Gain	1	530	0.00188679245283019
10	87966007	A>C	PTEN	UTR3	UCEC	GCATACA	-	IGF2BP2,HNRNPLL	Gain	1	530	0.00188679245283019
10	87966007	A>C	PTEN	UTR3	UCEC	TAAAAT	-	PPIE	Loss	1	530	0.00188679245283019
10	87966007	T>G	PTEN	UTR3	UCEC	TAATTT	+	PPIE	Loss	1	530	0.00188679245283019
10	87966007	T>G	PTEN	UTR3	UCEC	TTTTAT	+	PPIE	Loss	1	530	0.00188679245283019
10	87966092	G>A	PTEN	UTR3	UCEC	GAATGT	-	TARDBP	Loss	1	530	0.00188679245283019
10	87966127	G>A	PTEN	UTR3	UCEC	ACATTTT	+	LmjF180180	Gain	1	530	0.00188679245283019
10	87966127	C>T	PTEN	UTR3	UCEC	ATGCGCA	-	HNRNPDL	Loss	1	530	0.00188679245283019
10	87966127	G>A	PTEN	UTR3	UCEC	TTGCACA	+	SNRPA,Cscaffold4000008,SNRPA	Gain	1	530	0.00188679245283019
10	87966130	A>-	PTEN	UTR3	UCEC	AAAAAA	-	PPIE	Loss	9	530	0.0169811320754717
10	87966130	A>-	PTEN	UTR3	UCEC	AAAAAAA	-	ELAVL4,PCBP1,SYNCRIP,HNRNPU,FMR1,RBM5,IGHMBP2,PABPC4,FUS,HNRNPD,SART3,HNRNPK,PABPC1,DAZAP1,HNRNPA1,LmjF354130,PABPC4,PABPC4	Loss	9	530	0.0169811320754717
10	87966130	A>-	PTEN	UTR3	UCEC	AAAAAAAA	-	IGHMBP2,PABPC1	Loss	9	530	0.0169811320754717
10	87966130	A>-	PTEN	UTR3	UCEC	AAAAAAAAA	-	AGO2	Loss	9	530	0.0169811320754717
10	87966130	T>-	PTEN	UTR3	UCEC	TTTTTT	+	KHDRBS1,HNRNPC,DDX19B,EIF4A3,PPIE,CPEB4	Loss	9	530	0.0169811320754717
10	87966130	T>-	PTEN	UTR3	UCEC	TTTTTTT	+	DAZAP1,TIA1,ELAVL1,ELAVL4,PCBP1,U2AF2,HNRNPCL1,HNRNPA1,HNRNPC,FUS,NOVA1,SFPQ,NOVA2,KHDRBS2,PCBP2,RALY,KHDRBS1,FMR1,ELAVL3,KHDRBS3,HNRNPU,DDX19B,HNRNPK,SYNCRIP,PTBP1,egw103003671,ELAVL1,gw184451,HNRNPC,HNRNPCL1,PUF60,Sxl,TVAG514790	Loss	9	530	0.0169811320754717
10	87966130	T>-	PTEN	UTR3	UCEC	TTTTTTTTT	+	TIA1	Loss	9	530	0.0169811320754717
10	87966147	T>C	PTEN	UTR3	UCEC	GCATAC	+	YTHDC1,SRSF1*,HNRNPC*	Gain	1	530	0.00188679245283019
10	87966243	A>-	PTEN	UTR3	UCEC	AAAAAT	+	PPIE	Loss	1	530	0.00188679245283019
10	87966243	A>-	PTEN	UTR3	UCEC	AAAAATA	+	NUPL2,PABPN1L	Loss	1	530	0.00188679245283019
10	87966243	A>-	PTEN	UTR3	UCEC	ATAAAAA	+	KHDRBS1	Loss	1	530	0.00188679245283019
10	87966243	T>-	PTEN	UTR3	UCEC	ATTTTA	-	PPIE,TIAL1,KHSRP	Gain	1	530	0.00188679245283019
10	87966243	T>-	PTEN	UTR3	UCEC	ATTTTT	-	PPIE	Loss	1	530	0.00188679245283019
10	87966243	T>-	PTEN	UTR3	UCEC	ATTTTTA	-	ELAVL2,TIAL1,TRNAU1AP	Loss	1	530	0.00188679245283019
10	87966243	A>-	PTEN	UTR3	UCEC	TAAAAA	+	PPIE	Loss	1	530	0.00188679245283019
10	87966243	A>-	PTEN	UTR3	UCEC	TAAAAT	+	PPIE	Gain	1	530	0.00188679245283019
10	87966243	T>-	PTEN	UTR3	UCEC	TATTTTT	-	TRNAU1AP	Loss	1	530	0.00188679245283019
10	87966243	T>-	PTEN	UTR3	UCEC	TTTTTA	-	PPIE,HNRNPC	Loss	1	530	0.00188679245283019
10	87966576	A>C	PTEN	UTR3	UCEC	CACATTG	-	RC3H1	Gain	1	530	0.00188679245283019
10	87966621	C>T	PTEN	UTR3	UCEC	CATCAT	-	SRSF3	Loss	1	530	0.00188679245283019
10	87966621	G>A	PTEN	UTR3	UCEC	TGATAC	+	YTHDC1	Gain	1	530	0.00188679245283019
10	87966621	G>A	PTEN	UTR3	UCEC	TGATGC	+	YTHDC1	Loss	1	530	0.00188679245283019
10	87966621	G>A	PTEN	UTR3	UCEC	TGATGCA	+	SRSF1,SRSF9	Loss	1	530	0.00188679245283019
10	87966621	C>T	PTEN	UTR3	UCEC	TGCATC	-	SRSF5	Loss	1	530	0.00188679245283019
10	87966644	C>T	PTEN	UTR3	UCEC	AGCTGTT	+	SRSF2*	Gain	1	530	0.00188679245283019
10	87966644	C>T	PTEN	UTR3	UCEC	CAGCCGT	+	SRSF1	Loss	1	530	0.00188679245283019
10	87966644	G>A	PTEN	UTR3	UCEC	GGAACAGC	-	SRSF1	Gain	1	530	0.00188679245283019
10	87966701	A>-	PTEN	UTR3	UCEC	AAAAAA	-	PPIE	Loss	1	530	0.00188679245283019
10	87966701	T>-	PTEN	UTR3	UCEC	ATTTTTA	+	ELAVL2,TIAL1,TRNAU1AP	Gain	1	530	0.00188679245283019
10	87966701	T>-	PTEN	UTR3	UCEC	ATTTTTT	+	HNRNPCL1,HNRNPC,TIA1,PTBP1,BOLL,HNRNPC,HNRNPCL1,Smp067420,HNRNPC,HNRNPCL1	Loss	1	530	0.00188679245283019
10	87966701	T>-	PTEN	UTR3	UCEC	TTTTTT	+	KHDRBS1,HNRNPC,DDX19B,EIF4A3,PPIE,CPEB4	Loss	1	530	0.00188679245283019
10	87966701	T>-	PTEN	UTR3	UCEC	TTTTTTA	+	CPEB1	Loss	1	530	0.00188679245283019
10	87966731	A>C	PTEN	UTR3	UCEC	AAAATT	-	PPIE	Loss	1	530	0.00188679245283019
10	87966731	A>C	PTEN	UTR3	UCEC	AAATTCCC	-	PCBP2,PCBP1	Loss	1	530	0.00188679245283019
10	87966731	T>G	PTEN	UTR3	UCEC	AATTTT	+	PPIE	Loss	1	530	0.00188679245283019
10	87966731	T>G	PTEN	UTR3	UCEC	ATTTTA	+	PPIE,TIAL1,KHSRP	Loss	1	530	0.00188679245283019
10	87966731	T>G	PTEN	UTR3	UCEC	GAATGT	+	TARDBP	Gain	1	530	0.00188679245283019
10	87966731	A>C	PTEN	UTR3	UCEC	TAAAAT	-	PPIE	Loss	1	530	0.00188679245283019
10	87966731	T>G	PTEN	UTR3	UCEC	TTTTAC	+	KHDRBS1	Loss	1	530	0.00188679245283019
10	87966806	G>A	PTEN	UTR3	UCEC	AATAAA	+	PPIE	Gain	1	530	0.00188679245283019
10	87966806	G>A	PTEN	UTR3	UCEC	AATAAAC	+	KHDRBS2	Gain	1	530	0.00188679245283019
10	87966806	C>T	PTEN	UTR3	UCEC	ACTGCA	-	HNRNPDL	Loss	1	530	0.00188679245283019
10	87966806	G>A	PTEN	UTR3	UCEC	ATAAAC	+	KHDRBS3	Gain	1	530	0.00188679245283019
10	87966806	C>T	PTEN	UTR3	UCEC	TACTGC	-	YTHDC1	Loss	1	530	0.00188679245283019
10	87966806	C>T	PTEN	UTR3	UCEC	TTTATT	-	PPIE	Gain	1	530	0.00188679245283019
10	87966827	->A	PTEN	UTR3	UCEC	ACACAAA	+	HNRNPL	Loss	2	530	0.00377358490566038
10	87966827	->A	PTEN	UTR3	UCEC	GCACACA	+	IGF2BP2,HNRNPLL	Loss	2	530	0.00377358490566038
10	87966827	->T	PTEN	UTR3	UCEC	GTTGTGC	-	TARDBP	Gain	2	530	0.00377358490566038
10	87966827	->T	PTEN	UTR3	UCEC	TGTGTG	-	CELF1,TARDBP,CELF2	Loss	2	530	0.00377358490566038
10	87966827	->T	PTEN	UTR3	UCEC	TGTTGT	-	CELF2	Gain	2	530	0.00377358490566038
10	87966827	->T	PTEN	UTR3	UCEC	TGTTGTG	-	unc75	Gain	2	530	0.00377358490566038
10	87966827	->T	PTEN	UTR3	UCEC	TTGTGC	-	ZFP36	Gain	2	530	0.00377358490566038
10	87966827	->T	PTEN	UTR3	UCEC	TTGTGT	-	CELF2	Loss	2	530	0.00377358490566038
10	87966827	->T	PTEN	UTR3	UCEC	TTTGTGT	-	etr1	Loss	2	530	0.00377358490566038
10	87966828	A>-	PTEN	UTR3	UCEC	AAAAAA	+	PPIE	Loss	3	530	0.00566037735849057
10	87966828	A>-	PTEN	UTR3	UCEC	AAAAAAA	+	ELAVL4,PCBP1,SYNCRIP,HNRNPU,FMR1,RBM5,IGHMBP2,PABPC4,FUS,HNRNPD,SART3,HNRNPK,PABPC1,DAZAP1,HNRNPA1,LmjF354130,PABPC4,PABPC4	Loss	3	530	0.00566037735849057
10	87966828	A>-	PTEN	UTR3	UCEC	AAAAAAAA	+	IGHMBP2,PABPC1	Loss	3	530	0.00566037735849057
10	87966828	T>-	PTEN	UTR3	UCEC	TTTTTT	-	KHDRBS1,HNRNPC,DDX19B,EIF4A3,PPIE,CPEB4	Loss	3	530	0.00566037735849057
10	87966828	T>-	PTEN	UTR3	UCEC	TTTTTTT	-	DAZAP1,TIA1,ELAVL1,ELAVL4,PCBP1,U2AF2,HNRNPCL1,HNRNPA1,HNRNPC,FUS,NOVA1,SFPQ,NOVA2,KHDRBS2,PCBP2,RALY,KHDRBS1,FMR1,ELAVL3,KHDRBS3,HNRNPU,DDX19B,HNRNPK,SYNCRIP,PTBP1,egw103003671,ELAVL1,gw184451,HNRNPC,HNRNPCL1,PUF60,Sxl,TVAG514790	Loss	3	530	0.00566037735849057
10	87966895	G>T	PTEN	UTR3	UCEC	AAATAA	+	PPIE	Gain	1	530	0.00188679245283019
10	87966895	G>T	PTEN	UTR3	UCEC	AATAAT	+	PPIE,KHDRBS3	Gain	1	530	0.00188679245283019
10	87966895	G>T	PTEN	UTR3	UCEC	ATAATA	+	PPIE	Gain	1	530	0.00188679245283019
10	87966895	C>A	PTEN	UTR3	UCEC	ATTATT	-	PPIE	Gain	1	530	0.00188679245283019
10	87966895	C>A	PTEN	UTR3	UCEC	CTATTCT	-	PTBP3	Loss	1	530	0.00188679245283019
10	87966895	G>T	PTEN	UTR3	UCEC	GAAAGAA	+	SRSF10	Loss	1	530	0.00188679245283019
10	87966895	G>T	PTEN	UTR3	UCEC	GAAAGAAT	+	TRA2B	Loss	1	530	0.00188679245283019
10	87966895	C>A	PTEN	UTR3	UCEC	TATTAT	-	PPIE,KHSRP	Gain	1	530	0.00188679245283019
10	87966895	C>A	PTEN	UTR3	UCEC	TATTATT	-	ELAVL4	Gain	1	530	0.00188679245283019
10	87966895	C>A	PTEN	UTR3	UCEC	TCTTTC	-	ZFP36	Loss	1	530	0.00188679245283019
10	87966895	C>A	PTEN	UTR3	UCEC	TTATTT	-	PPIE	Gain	1	530	0.00188679245283019
10	87966895	C>A	PTEN	UTR3	UCEC	TTCTTT	-	PTBP1	Loss	1	530	0.00188679245283019
10	87967043	T>C	PTEN	UTR3	UCEC	ATCGTA	-	SRSF6	Loss	1	530	0.00188679245283019
10	87967043	A>G	PTEN	UTR3	UCEC	GCATAC	+	YTHDC1,SRSF1*,HNRNPC*	Loss	1	530	0.00188679245283019
10	87967043	A>G	PTEN	UTR3	UCEC	GCATGC	+	YTHDC1	Gain	1	530	0.00188679245283019
10	87967043	T>C	PTEN	UTR3	UCEC	GCATGC	-	YTHDC1	Gain	1	530	0.00188679245283019
10	87967043	T>C	PTEN	UTR3	UCEC	GCATGCA	-	SRSF10	Gain	1	530	0.00188679245283019
10	87967043	A>G	PTEN	UTR3	UCEC	GCATGCG	+	RBM4,SFPQ	Gain	1	530	0.00188679245283019
10	87967043	A>G	PTEN	UTR3	UCEC	TGCATA	+	SRSF5	Loss	1	530	0.00188679245283019
10	87967043	A>G	PTEN	UTR3	UCEC	TGCATG	+	RBFOX2,KHSRP,RBFOX1,A2BP1	Gain	1	530	0.00188679245283019
10	87967043	A>G	PTEN	UTR3	UCEC	TGCATGC	+	RBFOX1,A2BP1,RBFOX2,RBFOX3	Gain	1	530	0.00188679245283019
10	87967103	->A	PTEN	UTR3	UCEC	AAAAACA	-	PABPC3,IGF2BP3,IGF2BP2	Gain	1	530	0.00188679245283019
10	87967103	->A	PTEN	UTR3	UCEC	AAAAACC	-	PABPC3	Loss	1	530	0.00188679245283019
10	87967103	->T	PTEN	UTR3	UCEC	AAGTGTT	+	RBMX	Gain	1	530	0.00188679245283019
10	87967103	->A	PTEN	UTR3	UCEC	ACCTTT	-	ZFP36	Loss	1	530	0.00188679245283019
10	87967103	->A	PTEN	UTR3	UCEC	ACTTTT	-	ZFP36	Gain	1	530	0.00188679245283019
10	87967103	->A	PTEN	UTR3	UCEC	ACTTTTT	-	PTBP1,RBM15B	Gain	1	530	0.00188679245283019
10	87967103	->T	PTEN	UTR3	UCEC	AGGTTT	+	ZRANB2	Loss	1	530	0.00188679245283019
10	87967103	->A	PTEN	UTR3	UCEC	CCTTTT	-	ZFP36	Loss	1	530	0.00188679245283019
10	87967103	->A	PTEN	UTR3	UCEC	CCTTTTT	-	CPEB2,PTBP1	Loss	1	530	0.00188679245283019
10	87967103	->T	PTEN	UTR3	UCEC	TGTTTTT	+	gw121961CONSTRUC	Gain	1	530	0.00188679245283019
10	87967104	A>-	PTEN	UTR3	UCEC	AAAAAA	-	PPIE	Loss	2	530	0.00377358490566038
10	87967104	A>-	PTEN	UTR3	UCEC	AAAAAAA	-	ELAVL4,PCBP1,SYNCRIP,HNRNPU,FMR1,RBM5,IGHMBP2,PABPC4,FUS,HNRNPD,SART3,HNRNPK,PABPC1,DAZAP1,HNRNPA1,LmjF354130,PABPC4,PABPC4	Loss	2	530	0.00377358490566038
10	87967104	A>-	PTEN	UTR3	UCEC	AAAAAAAA	-	IGHMBP2,PABPC1	Loss	2	530	0.00377358490566038
10	87967104	A>-	PTEN	UTR3	UCEC	AAAAAAAAA	-	AGO2	Loss	2	530	0.00377358490566038
10	87967104	T>-	PTEN	UTR3	UCEC	GTTTTTTTTC	+	TIA1	Gain	2	530	0.00377358490566038
10	87967104	T>-	PTEN	UTR3	UCEC	TTTTTT	+	KHDRBS1,HNRNPC,DDX19B,EIF4A3,PPIE,CPEB4	Loss	2	530	0.00377358490566038
10	87967104	T>-	PTEN	UTR3	UCEC	TTTTTTT	+	DAZAP1,TIA1,ELAVL1,ELAVL4,PCBP1,U2AF2,HNRNPCL1,HNRNPA1,HNRNPC,FUS,NOVA1,SFPQ,NOVA2,KHDRBS2,PCBP2,RALY,KHDRBS1,FMR1,ELAVL3,KHDRBS3,HNRNPU,DDX19B,HNRNPK,SYNCRIP,PTBP1,egw103003671,ELAVL1,gw184451,HNRNPC,HNRNPCL1,PUF60,Sxl,TVAG514790	Loss	2	530	0.00377358490566038
10	87967104	T>-	PTEN	UTR3	UCEC	TTTTTTTTT	+	TIA1	Loss	2	530	0.00377358490566038
10	87967141	C>A	PTEN	UTR3	UCEC	ACATTCA	+	IGF2BP3,IGF2BP2	Gain	1	530	0.00188679245283019
10	87967141	C>A	PTEN	UTR3	UCEC	ACCTTC	+	ZFP36	Loss	1	530	0.00188679245283019
10	87967141	G>T	PTEN	UTR3	UCEC	AGGTAT	-	ZRANB2	Loss	1	530	0.00188679245283019
10	87967141	C>A	PTEN	UTR3	UCEC	ATACATT	+	RBM41	Gain	1	530	0.00188679245283019
10	87967141	G>T	PTEN	UTR3	UCEC	ATGTATA	-	KHSRP	Gain	1	530	0.00188679245283019
10	87967141	C>A	PTEN	UTR3	UCEC	CTTCAC	+	SRSF3	Loss	1	530	0.00188679245283019
10	87967141	G>T	PTEN	UTR3	UCEC	GAAGGTA	-	RBM5	Loss	1	530	0.00188679245283019
10	87967141	G>T	PTEN	UTR3	UCEC	GAATGT	-	TARDBP	Gain	1	530	0.00188679245283019
10	87967141	G>T	PTEN	UTR3	UCEC	TGAAGGT	-	SRSF1	Loss	1	530	0.00188679245283019
10	87967271	C>A	PTEN	UTR3	UCEC	ATTAAA	-	PPIE	Gain	1	530	0.00188679245283019
10	87967271	G>T	PTEN	UTR3	UCEC	ATTTAA	+	KHDRBS1,HNRNPA1,HNRNPA2B1,PPIE	Gain	1	530	0.00188679245283019
10	87967271	G>T	PTEN	UTR3	UCEC	GATTTAA	+	ZCRB1	Gain	1	530	0.00188679245283019
10	87967271	C>A	PTEN	UTR3	UCEC	TATTAA	-	PPIE	Gain	1	530	0.00188679245283019
10	87967271	C>A	PTEN	UTR3	UCEC	TTAAAT	-	KHDRBS1,PPIE	Gain	1	530	0.00188679245283019
10	87967271	G>T	PTEN	UTR3	UCEC	TTAATA	+	PPIE	Gain	1	530	0.00188679245283019
10	87967271	G>T	PTEN	UTR3	UCEC	TTTAAT	+	PPIE	Gain	1	530	0.00188679245283019
10	87967436	A>G	PTEN	UTR3	UCEC	AATATAA	-	A1CF	Loss	1	530	0.00188679245283019
10	87967436	A>G	PTEN	UTR3	UCEC	ATAAAT	-	PPIE	Loss	1	530	0.00188679245283019
10	87967436	A>G	PTEN	UTR3	UCEC	ATATAA	-	PPIE	Loss	1	530	0.00188679245283019
10	87967436	A>G	PTEN	UTR3	UCEC	ATATAGA	-	RBMS3	Gain	1	530	0.00188679245283019
10	87967436	T>C	PTEN	UTR3	UCEC	ATTTAT	+	PPIE	Loss	1	530	0.00188679245283019
10	87967436	T>C	PTEN	UTR3	UCEC	CACATC	+	SRSF5	Gain	1	530	0.00188679245283019
10	87967436	A>G	PTEN	UTR3	UCEC	TAAATGT	-	CELF1	Loss	1	530	0.00188679245283019
10	87967436	A>G	PTEN	UTR3	UCEC	TATAAA	-	PPIE	Loss	1	530	0.00188679245283019
10	87967436	T>C	PTEN	UTR3	UCEC	TTATAT	+	PPIE	Loss	1	530	0.00188679245283019
10	87967436	T>C	PTEN	UTR3	UCEC	TTTATA	+	PPIE,HNRNPA2B1,HNRNPA1	Loss	1	530	0.00188679245283019
10	87967559	A>C	PTEN	UTR3	UCEC	ACGCTG	+	MBNL1	Gain	1	530	0.00188679245283019
10	87967559	A>C	PTEN	UTR3	UCEC	ATAAAA	+	KHDRBS3,PPIE,KHDRBS1	Loss	1	530	0.00188679245283019
10	87967559	A>C	PTEN	UTR3	UCEC	ATAAAAG	+	KHDRBS1	Loss	1	530	0.00188679245283019
10	87967559	A>C	PTEN	UTR3	UCEC	ATAAAC	+	KHDRBS3	Gain	1	530	0.00188679245283019
10	87967559	A>C	PTEN	UTR3	UCEC	CATAAAC	+	NOVA1	Gain	1	530	0.00188679245283019
10	87967559	T>G	PTEN	UTR3	UCEC	CTTTTA	-	ELAVL2,TIAL1,TIA1	Loss	1	530	0.00188679245283019
10	87967559	T>G	PTEN	UTR3	UCEC	TTTTAT	-	PPIE	Loss	1	530	0.00188679245283019
10	87967562	T>G	PTEN	UTR3	UCEC	AGCGGA	+	SRSF6	Gain	1	530	0.00188679245283019
10	87967562	A>C	PTEN	UTR3	UCEC	CCGCTT	-	MBNL1	Gain	1	530	0.00188679245283019
10	87967562	A>C	PTEN	UTR3	UCEC	CGCTTT	-	MBNL1	Gain	1	530	0.00188679245283019
10	87967562	A>C	PTEN	UTR3	UCEC	TCCGCTTT	-	MBNL1	Gain	1	530	0.00188679245283019
10	87967638	G>A	PTEN	UTR3	UCEC	AAAATT	-	PPIE	Gain	3	530	0.00566037735849057
10	87967638	C>T	PTEN	UTR3	UCEC	AATTTT	+	PPIE	Gain	3	530	0.00566037735849057
10	87967638	C>T	PTEN	UTR3	UCEC	AATTTTG	+	estExtfgeneshHS	Gain	3	530	0.00566037735849057
10	87967638	C>T	PTEN	UTR3	UCEC	ATTTTG	+	TIA1,TIAL1	Gain	3	530	0.00566037735849057
10	87967638	G>A	PTEN	UTR3	UCEC	CAAAAT	-	KHDRBS1	Gain	3	530	0.00566037735849057
10	87967638	C>T	PTEN	UTR3	UCEC	CGGGCA	+	RBM25	Loss	3	530	0.00566037735849057
10	87967638	G>A	PTEN	UTR3	UCEC	GCCCAA	-	HNRNPK	Gain	3	530	0.00566037735849057
10	87967638	C>T	PTEN	UTR3	UCEC	TCGGGC	+	HNRNPA1*	Loss	3	530	0.00566037735849057
10	87967638	C>T	PTEN	UTR3	UCEC	TCGGGCA	+	SRSF1	Loss	3	530	0.00566037735849057
10	87967646	G>A	PTEN	UTR3	UCEC	CACATA	+	SRSF5	Gain	1	530	0.00188679245283019
10	87967646	G>A	PTEN	UTR3	UCEC	CACCGCA	+	HNRNPLL	Loss	1	530	0.00188679245283019
10	87967646	G>A	PTEN	UTR3	UCEC	CGCATA	+	SRSF5	Loss	1	530	0.00188679245283019
10	87967646	C>T	PTEN	UTR3	UCEC	TATGTG	-	CELF2	Gain	1	530	0.00188679245283019
10	87967646	C>T	PTEN	UTR3	UCEC	TGGTGC	-	YTHDC1	Gain	1	530	0.00188679245283019
10	87967646	C>T	PTEN	UTR3	UCEC	TGGTGCC	-	SRSF9,SRSF1	Gain	1	530	0.00188679245283019
10	87967646	C>T	PTEN	UTR3	UCEC	TGTGGTG	-	CELF6,BRUNOL6	Gain	1	530	0.00188679245283019
10	87967709	A>G	PTEN	UTR3	UCEC	ATGACA	+	FXR1	Loss	1	530	0.00188679245283019
10	87967709	T>C	PTEN	UTR3	UCEC	ATGCCA	-	MBNL1	Gain	1	530	0.00188679245283019
10	87967709	T>C	PTEN	UTR3	UCEC	TAATGC	-	YTHDC1	Gain	1	530	0.00188679245283019
10	87967745	G>A	PTEN	UTR3	UCEC	AAAAGA	-	PABPN1	Gain	1	530	0.00188679245283019
10	87967745	G>A	PTEN	UTR3	UCEC	AAAAGAA	-	SRSF10	Gain	1	530	0.00188679245283019
10	87967745	G>A	PTEN	UTR3	UCEC	AAAGAAA	-	SRSF10	Gain	1	530	0.00188679245283019
10	87967745	G>A	PTEN	UTR3	UCEC	AAAGGAA	-	SRSF10,NUPL2	Loss	1	530	0.00188679245283019
10	87967745	G>A	PTEN	UTR3	UCEC	AGAAAAA	-	PABPC1,SART3,PABPC1,SART3,Tbg97295210,TVAG002940	Gain	1	530	0.00188679245283019
10	87967745	G>A	PTEN	UTR3	UCEC	AGGAAAA	-	SRSF9	Loss	1	530	0.00188679245283019
10	87967745	C>T	PTEN	UTR3	UCEC	CTTTTG	+	TIAL1,TIA1	Gain	1	530	0.00188679245283019
10	87967745	C>T	PTEN	UTR3	UCEC	TCCTTT	+	ZFP36	Loss	1	530	0.00188679245283019
10	87967745	C>T	PTEN	UTR3	UCEC	TCTTTT	+	ZFP36	Gain	1	530	0.00188679245283019
10	87967745	C>T	PTEN	UTR3	UCEC	TTCTTT	+	PTBP1	Gain	1	530	0.00188679245283019
10	87967745	C>T	PTEN	UTR3	UCEC	TTCTTTT	+	PTBP1	Gain	1	530	0.00188679245283019
10	87967745	C>T	PTEN	UTR3	UCEC	TTTCTTT	+	PTBP1,RALYL	Gain	1	530	0.00188679245283019
10	87967745	C>T	PTEN	UTR3	UCEC	TTTTTCC	+	U2AF2	Loss	1	530	0.00188679245283019
10	87967745	C>T	PTEN	UTR3	UCEC	TTTTTCT	+	TIA1,PTBP1	Gain	1	530	0.00188679245283019
10	87967796	A>G	PTEN	UTR3	UCEC	AAAAACA	-	PABPC3,IGF2BP3,IGF2BP2	Loss	1	530	0.00188679245283019
10	87967796	T>C	PTEN	UTR3	UCEC	ATGCTT	+	MBNL1	Gain	1	530	0.00188679245283019
10	87967796	T>C	PTEN	UTR3	UCEC	CTTTTG	+	TIAL1,TIA1	Gain	1	530	0.00188679245283019
10	87967796	T>C	PTEN	UTR3	UCEC	GTTTTTG	+	TIAL1,TIA1	Loss	1	530	0.00188679245283019
10	87967796	A>G	PTEN	UTR3	UCEC	TCAAAAG	-	sf3b4	Gain	1	530	0.00188679245283019
10	87967796	T>C	PTEN	UTR3	UCEC	TGTTTTT	+	gw121961CONSTRUC	Loss	1	530	0.00188679245283019
10	87967796	T>C	PTEN	UTR3	UCEC	TTTTTG	+	HNRNPC	Loss	1	530	0.00188679245283019
10	87967847	A>C	PTEN	UTR3	UCEC	AAAAAT	+	PPIE	Loss	1	530	0.00188679245283019
10	87967847	T>G	PTEN	UTR3	UCEC	ATTTTT	-	PPIE	Loss	1	530	0.00188679245283019
10	87967847	T>G	PTEN	UTR3	UCEC	ATTTTTC	-	TIA1,ELAVL2	Loss	1	530	0.00188679245283019
10	87967847	T>G	PTEN	UTR3	UCEC	CATTTTT	-	CPEB2,HNRNPC,RALYL	Loss	1	530	0.00188679245283019
10	87967847	T>G	PTEN	UTR3	UCEC	CCATTTT	-	Rox8	Loss	1	530	0.00188679245283019
10	87967847	T>G	PTEN	UTR3	UCEC	TTTTTC	-	HNRNPC	Loss	1	530	0.00188679245283019
10	87967847	T>G	PTEN	UTR3	UCEC	TTTTTCC	-	U2AF2	Loss	1	530	0.00188679245283019
10	87967863	->TA	PTEN	UTR3	UCEC	ATATATA	+	RBMS3,CNOT4,HNRNPD,RBMS3	Gain	1	530	0.00188679245283019
10	87967863	->TA	PTEN	UTR3	UCEC	TATATA	+	RBMS3,PPIE	Gain	1	530	0.00188679245283019
10	87967863	->TA	PTEN	UTR3	UCEC	TATATA	-	RBMS3,PPIE	Gain	1	530	0.00188679245283019
10	87967863	->TA	PTEN	UTR3	UCEC	TATATAT	-	FUBP3	Gain	1	530	0.00188679245283019
10	87968005	C>T	PTEN	UTR3	UCEC	CCTGAAA	+	TRA2A	Loss	1	530	0.00188679245283019
10	87968005	G>A	PTEN	UTR3	UCEC	TTTCAGG	-	SRSF6	Loss	1	530	0.00188679245283019
10	87968329	A>C	PTEN	UTR3	UCEC	AAAATT	-	PPIE	Loss	1	530	0.00188679245283019
10	87968329	T>G	PTEN	UTR3	UCEC	AAATTT	+	PPIE	Loss	1	530	0.00188679245283019
10	87968329	A>C	PTEN	UTR3	UCEC	AAATTT	-	PPIE	Loss	1	530	0.00188679245283019
10	87968329	T>G	PTEN	UTR3	UCEC	AATTTT	+	PPIE	Loss	1	530	0.00188679245283019
10	87968329	T>G	PTEN	UTR3	UCEC	AATTTTG	+	estExtfgeneshHS	Loss	1	530	0.00188679245283019
10	87968329	T>G	PTEN	UTR3	UCEC	ATTTTG	+	TIA1,TIAL1	Loss	1	530	0.00188679245283019
10	87968329	A>C	PTEN	UTR3	UCEC	CAAAAT	-	KHDRBS1	Loss	1	530	0.00188679245283019
10	87968329	T>G	PTEN	UTR3	UCEC	GAAATTT	+	CG17838	Loss	1	530	0.00188679245283019
10	87968329	A>C	PTEN	UTR3	UCEC	GCACACA	-	IGF2BP2,HNRNPLL	Gain	1	530	0.00188679245283019
10	87968329	T>G	PTEN	UTR3	UCEC	TGTGTG	+	CELF1,TARDBP,CELF2	Gain	1	530	0.00188679245283019
10	87968329	T>G	PTEN	UTR3	UCEC	TTGTGC	+	ZFP36	Loss	1	530	0.00188679245283019
10	87968329	T>G	PTEN	UTR3	UCEC	TTGTGT	+	CELF2	Gain	1	530	0.00188679245283019
10	87968348	C>T	PTEN	UTR3	UCEC	AATGATG	+	RBM46	Gain	1	530	0.00188679245283019
10	87968348	G>A	PTEN	UTR3	UCEC	CATCAT	-	SRSF3	Gain	1	530	0.00188679245283019
10	87968348	C>T	PTEN	UTR3	UCEC	TGATGGC	+	SRSF1,SRSF9	Gain	1	530	0.00188679245283019
10	87968435	C>T	PTEN	UTR3	UCEC	CACTAAA	+	KHDRBS2	Loss	1	530	0.00188679245283019
10	87968435	G>A	PTEN	UTR3	UCEC	TAGTAC	-	YTHDC1	Gain	1	530	0.00188679245283019
10	87968435	G>A	PTEN	UTR3	UCEC	TAGTGC	-	YTHDC1	Loss	1	530	0.00188679245283019
10	87968505	C>A	PTEN	UTR3	UCEC	AACCTG	+	NXF1	Loss	1	530	0.00188679245283019
10	87968505	C>A	PTEN	UTR3	UCEC	ACCTGT	+	ZFP36	Loss	1	530	0.00188679245283019
10	87968505	C>A	PTEN	UTR3	UCEC	TCAACA	+	SRSF7	Gain	1	530	0.00188679245283019
10	87968529	C>A	PTEN	UTR3	UCEC	AATAAA	+	PPIE	Gain	1	530	0.00188679245283019
10	87968529	C>A	PTEN	UTR3	UCEC	AATAAAA	+	KHDRBS2	Gain	1	530	0.00188679245283019
10	87968529	C>A	PTEN	UTR3	UCEC	ATAAAA	+	KHDRBS3,PPIE,KHDRBS1	Gain	1	530	0.00188679245283019
10	87968529	C>A	PTEN	UTR3	UCEC	ATAAAAA	+	KHDRBS1	Gain	1	530	0.00188679245283019
10	87968529	C>A	PTEN	UTR3	UCEC	ATAATA	+	PPIE	Gain	1	530	0.00188679245283019
10	87968529	C>A	PTEN	UTR3	UCEC	ATAATAA	+	qkr58E1	Gain	1	530	0.00188679245283019
10	87968529	C>A	PTEN	UTR3	UCEC	ATATAA	+	PPIE	Gain	1	530	0.00188679245283019
10	87968529	G>T	PTEN	UTR3	UCEC	ATTATA	-	PPIE	Gain	1	530	0.00188679245283019
10	87968529	C>A	PTEN	UTR3	UCEC	CTAAAA	+	KHDRBS1	Loss	1	530	0.00188679245283019
10	87968529	C>A	PTEN	UTR3	UCEC	TAATAA	+	PPIE	Gain	1	530	0.00188679245283019
10	87968529	G>T	PTEN	UTR3	UCEC	TAGTAT	-	KHSRP	Loss	1	530	0.00188679245283019
10	87968529	G>T	PTEN	UTR3	UCEC	TAGTATA	-	DAZAP1,DAZAP1,MSI1	Loss	1	530	0.00188679245283019
10	87968529	C>A	PTEN	UTR3	UCEC	TATAAT	+	PPIE	Gain	1	530	0.00188679245283019
10	87968529	C>A	PTEN	UTR3	UCEC	TATATAC	+	RBMS1	Loss	1	530	0.00188679245283019
10	87968529	G>T	PTEN	UTR3	UCEC	TATTAT	-	PPIE,KHSRP	Gain	1	530	0.00188679245283019
10	87968529	G>T	PTEN	UTR3	UCEC	TTATAT	-	PPIE	Gain	1	530	0.00188679245283019
10	87968529	G>T	PTEN	UTR3	UCEC	TTATTA	-	PPIE	Gain	1	530	0.00188679245283019
10	87968529	G>T	PTEN	UTR3	UCEC	TTATTAT	-	FUBP1,FUBP3	Gain	1	530	0.00188679245283019
10	87968529	G>T	PTEN	UTR3	UCEC	TTTATT	-	PPIE	Gain	1	530	0.00188679245283019
10	87968529	G>T	PTEN	UTR3	UCEC	TTTTAT	-	PPIE	Gain	1	530	0.00188679245283019
10	87968529	G>T	PTEN	UTR3	UCEC	TTTTATT	-	TIA1	Gain	1	530	0.00188679245283019
10	87968663	G>T	PTEN	UTR3	UCEC	AGGATAA	+	G3BP2	Loss	1	530	0.00188679245283019
10	87968663	C>A	PTEN	UTR3	UCEC	TCCTGT	-	ZFP36	Loss	1	530	0.00188679245283019
10	87968663	G>T	PTEN	UTR3	UCEC	TGTACAG	+	ENOX1,pum,pum,pum	Loss	1	530	0.00188679245283019
10	87968663	G>T	PTEN	UTR3	UCEC	TGTACAT	+	PUM1	Gain	1	530	0.00188679245283019
10	87968691	G>A	PTEN	UTR3	UCEC	ACAAATA	-	PABPC1	Gain	1	530	0.00188679245283019
10	87968691	G>A	PTEN	UTR3	UCEC	TAGACA	-	HNRNPA2B1,HNRNPA1	Gain	1	530	0.00188679245283019
10	91959175	A>G	BTAF1	intronic	UCEC	AATTAT	+	PPIE	Loss	1	530	0.00188679245283019
10	91959175	T>C	BTAF1	intronic	UCEC	ATAATT	-	PPIE	Loss	1	530	0.00188679245283019
10	91959175	T>C	BTAF1	intronic	UCEC	ATAATTG	-	A1CF	Loss	1	530	0.00188679245283019
10	91959215	T>C	BTAF1	intronic	UCEC	CAGGGA	+	HNRNPA1	Gain	1	530	0.00188679245283019
10	91959215	A>G	BTAF1	intronic	UCEC	CCCTGC	-	ZFP36	Gain	1	530	0.00188679245283019
10	91959215	A>G	BTAF1	intronic	UCEC	CCCTGCA	-	SRSF1	Gain	1	530	0.00188679245283019
10	91959215	T>C	BTAF1	intronic	UCEC	GTAGGGA	+	HNRNPA1L2,HNRNPA2B1,HNRNPA1	Loss	1	530	0.00188679245283019
10	91959215	T>C	BTAF1	intronic	UCEC	TAGGGA	+	HNRNPA1	Loss	1	530	0.00188679245283019
10	91959215	A>G	BTAF1	intronic	UCEC	TCCCTA	-	HNRNPK	Loss	1	530	0.00188679245283019
10	91959226	C>T	BTAF1	intronic	UCEC	AGTAATG	+	SFPQ	Gain	1	530	0.00188679245283019
10	91959226	C>T	BTAF1	intronic	UCEC	GTAACG	+	DAZAP1	Loss	1	530	0.00188679245283019
10	91959238	C>T	BTAF1	intronic	UCEC	CACGGC	-	SRSF5	Loss	1	530	0.00188679245283019
10	91959238	C>T	BTAF1	intronic	UCEC	CGGCACA	-	SRSF1	Loss	1	530	0.00188679245283019
10	91959238	C>T	BTAF1	intronic	UCEC	CTTCAC	-	SRSF3	Loss	1	530	0.00188679245283019
10	91959238	C>T	BTAF1	intronic	UCEC	CTTCACG	-	SRSF6	Loss	1	530	0.00188679245283019
10	91959261	->GTCAGATGTTAAATGTTTAAGAAACA	BTAF1	intronic	UCEC	AAATAA	+	PPIE	Loss	1	530	0.00188679245283019
10	91959261	->TGTTTCTTAAACATTTAACATCTGAC	BTAF1	intronic	UCEC	AACATC	-	YBX1,ybx2-a,ybx2-a	Gain	1	530	0.00188679245283019
10	91959261	->TGTTTCTTAAACATTTAACATCTGAC	BTAF1	intronic	UCEC	AACATCT	-	YBX1,YBX2	Gain	1	530	0.00188679245283019
10	91959261	->TGTTTCTTAAACATTTAACATCTGAC	BTAF1	intronic	UCEC	ATCTGAC	-	HNRNPDL	Gain	1	530	0.00188679245283019
10	91959261	->TGTTTCTTAAACATTTAACATCTGAC	BTAF1	intronic	UCEC	ATTTAA	-	KHDRBS1,HNRNPA1,HNRNPA2B1,PPIE	Gain	1	530	0.00188679245283019
10	91959261	->TGTTTCTTAAACATTTAACATCTGAC	BTAF1	intronic	UCEC	ATTTAC	-	KHDRBS1	Loss	1	530	0.00188679245283019
10	91959261	->TGTTTCTTAAACATTTAACATCTGAC	BTAF1	intronic	UCEC	CATCTG	-	YBX1	Gain	1	530	0.00188679245283019
10	91959261	->GTCAGATGTTAAATGTTTAAGAAACA	BTAF1	intronic	UCEC	TAAATA	+	PPIE	Loss	1	530	0.00188679245283019
10	91959261	->GTCAGATGTTAAATGTTTAAGAAACA	BTAF1	intronic	UCEC	TAAATAA	+	KHDRBS3	Loss	1	530	0.00188679245283019
10	91959261	->GTCAGATGTTAAATGTTTAAGAAACA	BTAF1	intronic	UCEC	TAAATGT	+	CELF1	Gain	1	530	0.00188679245283019
10	91959261	->TGTTTCTTAAACATTTAACATCTGAC	BTAF1	intronic	UCEC	TATGTT	-	CELF2	Gain	1	530	0.00188679245283019
10	91959261	->TGTTTCTTAAACATTTAACATCTGAC	BTAF1	intronic	UCEC	TATTTA	-	PPIE,KHSRP	Loss	1	530	0.00188679245283019
10	91959261	->GTCAGATGTTAAATGTTTAAGAAACA	BTAF1	intronic	UCEC	TTAAAT	+	KHDRBS1,PPIE	Gain	1	530	0.00188679245283019
10	91959261	->TGTTTCTTAAACATTTAACATCTGAC	BTAF1	intronic	UCEC	TTATTT	-	PPIE	Loss	1	530	0.00188679245283019
10	91959272	G>A	BTAF1	intronic	UCEC	AAATAT	+	PPIE	Gain	1	530	0.00188679245283019
10	91959272	G>A	BTAF1	intronic	UCEC	AGATAT	+	HNRNPA1,HNRNPD,HNRNPA2B1,DAZAP1,HNRNPA0,HNRNPDL	Loss	1	530	0.00188679245283019
10	91959272	C>T	BTAF1	intronic	UCEC	ATATTT	-	PPIE	Gain	1	530	0.00188679245283019
10	91959272	C>T	BTAF1	intronic	UCEC	CTCTTC	-	PTBP1	Loss	1	530	0.00188679245283019
10	91959272	G>A	BTAF1	intronic	UCEC	GAAGAA	+	SRSF1,TRA2B	Gain	1	530	0.00188679245283019
10	91959272	G>A	BTAF1	intronic	UCEC	GAAGAG	+	HNRNPH1	Loss	1	530	0.00188679245283019
10	91959272	G>A	BTAF1	intronic	UCEC	GAGGAAGAA	+	SRSF6,SRSF5,SRSF1,SRSF4	Gain	1	530	0.00188679245283019
10	91959272	C>T	BTAF1	intronic	UCEC	TTCTTC	-	PTBP1	Gain	1	530	0.00188679245283019
10	91996571	G>A	BTAF1	splicing	UCEC	CTATATC	+	RBMS3	Gain	1	530	0.00188679245283019
10	91996571	C>T	BTAF1	splicing	UCEC	GATATAG	-	RBMS1	Gain	1	530	0.00188679245283019
10	91996571	C>T	BTAF1	splicing	UCEC	GGATAC	-	HNRNPC,SRSF1,YTHDC1	Loss	1	530	0.00188679245283019
10	91996571	C>T	BTAF1	splicing	UCEC	GGATAT	-	SRSF1*,HNRNPC*	Gain	1	530	0.00188679245283019
10	91996571	C>T	BTAF1	splicing	UCEC	TAGGCA	-	HNRNPA1	Gain	1	530	0.00188679245283019
10	92018782	C>A	BTAF1	splicing	UCEC	ATTCAAG	-	SNRNP70	Gain	1	530	0.00188679245283019
10	92018782	G>T	BTAF1	splicing	UCEC	GAATGC	+	YTHDC1,2_YTHDC1	Gain	1	530	0.00188679245283019
10	92018782	C>A	BTAF1	splicing	UCEC	GCATTCA	-	IGF2BP2	Gain	1	530	0.00188679245283019
10	92018782	G>T	BTAF1	splicing	UCEC	TGAAGGC	+	SRSF1,SRSF9	Loss	1	530	0.00188679245283019
10	92026591	C>A	BTAF1	splicing	UCEC	AACCTAA	-	ANIA04546	Loss	1	530	0.00188679245283019
10	92026591	C>A	BTAF1	splicing	UCEC	ACATAAA	-	HNRNPL	Gain	1	530	0.00188679245283019
10	92026591	G>T	BTAF1	splicing	UCEC	AGGTTT	+	ZRANB2	Loss	1	530	0.00188679245283019
10	92026591	C>A	BTAF1	splicing	UCEC	ATAAAA	-	KHDRBS3,PPIE,KHDRBS1	Gain	1	530	0.00188679245283019
10	92026591	C>A	BTAF1	splicing	UCEC	ATAAAAG	-	KHDRBS1	Gain	1	530	0.00188679245283019
10	92026591	C>A	BTAF1	splicing	UCEC	CTAAAA	-	KHDRBS1	Loss	1	530	0.00188679245283019
10	92026591	G>T	BTAF1	splicing	UCEC	GGTTTAA	+	ZCRB1	Loss	1	530	0.00188679245283019
10	92026591	G>T	BTAF1	splicing	UCEC	TAGGTT	+	KHSRP	Loss	1	530	0.00188679245283019
10	92026591	G>T	BTAF1	splicing	UCEC	TATGTT	+	CELF2	Gain	1	530	0.00188679245283019
10	92026591	G>T	BTAF1	splicing	UCEC	TTTTAT	+	PPIE	Gain	1	530	0.00188679245283019
10	92026591	G>T	BTAF1	splicing	UCEC	TTTTATGTT	+	ELAVL2	Gain	1	530	0.00188679245283019
10	92029310	G>T	BTAF1	UTR3	UCEC	AAATAT	+	PPIE	Gain	1	530	0.00188679245283019
10	92029310	G>T	BTAF1	UTR3	UCEC	AATATA	+	RBMS3,PPIE	Gain	1	530	0.00188679245283019
10	92029310	G>T	BTAF1	UTR3	UCEC	AATATAA	+	A1CF	Gain	1	530	0.00188679245283019
10	92029310	G>T	BTAF1	UTR3	UCEC	ATAGAA	+	HNRNPA1	Loss	1	530	0.00188679245283019
10	92029310	G>T	BTAF1	UTR3	UCEC	ATATAA	+	PPIE	Gain	1	530	0.00188679245283019
10	92029310	C>A	BTAF1	UTR3	UCEC	ATATTT	-	PPIE	Gain	1	530	0.00188679245283019
10	92029310	C>A	BTAF1	UTR3	UCEC	ATATTTA	-	shep,sup26CONSTRUCT	Gain	1	530	0.00188679245283019
10	92029310	C>A	BTAF1	UTR3	UCEC	CAAGTTA	-	DAZ3	Gain	1	530	0.00188679245283019
10	92029310	C>A	BTAF1	UTR3	UCEC	CTATTTA	-	RBMS2	Loss	1	530	0.00188679245283019
10	92029310	C>A	BTAF1	UTR3	UCEC	TATATT	-	PPIE	Gain	1	530	0.00188679245283019
10	92029310	C>A	BTAF1	UTR3	UCEC	TATATTTA	-	KHSRP	Gain	1	530	0.00188679245283019
10	92029310	C>A	BTAF1	UTR3	UCEC	TTATAT	-	PPIE	Gain	1	530	0.00188679245283019
10	92029398	C>A	BTAF1	UTR3	UCEC	AATGAAT	+	RBM46	Gain	1	530	0.00188679245283019
10	92029819	G>A	BTAF1	UTR3	UCEC	AAAATT	+	PPIE	Gain	1	530	0.00188679245283019
10	92029819	G>A	BTAF1	UTR3	UCEC	AAATTT	+	PPIE	Gain	1	530	0.00188679245283019
10	92029819	C>T	BTAF1	UTR3	UCEC	AAATTT	-	PPIE	Gain	1	530	0.00188679245283019
10	92029819	C>T	BTAF1	UTR3	UCEC	AATTTT	-	PPIE	Gain	1	530	0.00188679245283019
10	92029819	G>A	BTAF1	UTR3	UCEC	AGAAAAT	+	PABPC5	Gain	1	530	0.00188679245283019
10	92029819	G>A	BTAF1	UTR3	UCEC	AGAGAAA	+	SRSF10,Fusip1,Fusip1,Fusip1	Gain	1	530	0.00188679245283019
10	92029819	G>A	BTAF1	UTR3	UCEC	AGAGAGA	+	SRSF10,SRSF11	Loss	1	530	0.00188679245283019
10	92029819	C>T	BTAF1	UTR3	UCEC	ATTTTC	-	ELAVL2,TIA1,TIAL1	Gain	1	530	0.00188679245283019
10	92029819	C>T	BTAF1	UTR3	UCEC	ATTTTCT	-	PTBP1	Gain	1	530	0.00188679245283019
10	92029819	C>T	BTAF1	UTR3	UCEC	CTCTCT	-	PTBP1,PTBP2	Loss	1	530	0.00188679245283019
10	92029819	C>T	BTAF1	UTR3	UCEC	GAAATTT	-	CG17838	Gain	1	530	0.00188679245283019
10	92029819	C>T	BTAF1	UTR3	UCEC	TCTCTC	-	PTBP1	Loss	1	530	0.00188679245283019
10	92029819	C>T	BTAF1	UTR3	UCEC	TTTCTCT	-	PUF60	Gain	1	530	0.00188679245283019
10	92029891	A>G	BTAF1	UTR3	UCEC	ACCCAA	+	HNRNPK	Loss	1	530	0.00188679245283019
10	92029891	A>G	BTAF1	UTR3	UCEC	CAAAAAG	+	ENSXETG00000018075	Loss	1	530	0.00188679245283019
10	92029891	T>C	BTAF1	UTR3	UCEC	CCTTTC	-	ZFP36	Gain	1	530	0.00188679245283019
10	92029891	T>C	BTAF1	UTR3	UCEC	CCTTTCT	-	PTBP1	Gain	1	530	0.00188679245283019
10	92029891	T>C	BTAF1	UTR3	UCEC	CCTTTT	-	ZFP36	Loss	1	530	0.00188679245283019
10	92029891	T>C	BTAF1	UTR3	UCEC	CCTTTTT	-	CPEB2,PTBP1	Loss	1	530	0.00188679245283019
10	92029891	T>C	BTAF1	UTR3	UCEC	CTTTTT	-	ELAVL2	Loss	1	530	0.00188679245283019
10	92029891	T>C	BTAF1	UTR3	UCEC	CTTTTTG	-	TIAL1,HNRNPC,ELAVL2,HNRNPCL1	Loss	1	530	0.00188679245283019
10	92029891	T>C	BTAF1	UTR3	UCEC	TTTCTGG	-	SRSF6	Gain	1	530	0.00188679245283019
10	92029891	T>C	BTAF1	UTR3	UCEC	TTTTTG	-	HNRNPC	Loss	1	530	0.00188679245283019
10	92029891	T>C	BTAF1	UTR3	UCEC	TTTTTGG	-	TIA1	Loss	1	530	0.00188679245283019
10	92029975	T>C	BTAF1	UTR3	UCEC	GCGAGGG	+	EIF4G2	Gain	1	530	0.00188679245283019
10	92029975	A>G	BTAF1	UTR3	UCEC	TCACCAT	-	NOVA1	Loss	1	530	0.00188679245283019
10	92029975	T>C	BTAF1	UTR3	UCEC	TGGTGA	+	FUS	Loss	1	530	0.00188679245283019
10	92030038	C>T	BTAF1	UTR3	UCEC	GTTTTA	+	TIA1	Gain	1	530	0.00188679245283019
10	92030038	G>A	BTAF1	UTR3	UCEC	TGCGTA	-	SRSF5,SRSF6	Gain	1	530	0.00188679245283019
10	92030038	G>A	BTAF1	UTR3	UCEC	TGCGTG	-	SRSF6	Loss	1	530	0.00188679245283019
10	92030038	C>T	BTAF1	UTR3	UCEC	TTTCACG	+	SRSF6	Loss	1	530	0.00188679245283019
10	92030038	C>T	BTAF1	UTR3	UCEC	TTTTAC	+	KHDRBS1	Gain	1	530	0.00188679245283019
10	92030298	G>T	BTAF1	UTR3	UCEC	ATAATA	+	PPIE	Gain	1	530	0.00188679245283019
10	92030298	G>T	BTAF1	UTR3	UCEC	ATAATAA	+	qkr58E1	Gain	1	530	0.00188679245283019
10	92030298	C>A	BTAF1	UTR3	UCEC	CTCTTG	-	PTBP1	Loss	1	530	0.00188679245283019
10	92030298	G>T	BTAF1	UTR3	UCEC	TAATAA	+	PPIE	Gain	1	530	0.00188679245283019
10	92030298	C>A	BTAF1	UTR3	UCEC	TATTAT	-	PPIE,KHSRP	Gain	1	530	0.00188679245283019
10	92030298	C>A	BTAF1	UTR3	UCEC	TTATTA	-	PPIE	Gain	1	530	0.00188679245283019
10	92030298	C>A	BTAF1	UTR3	UCEC	TTATTAT	-	FUBP1,FUBP3	Gain	1	530	0.00188679245283019
10	92030319	TG>-	BTAF1	UTR3	UCEC	CTAAAA	+	KHDRBS1	Gain	1	530	0.00188679245283019
10	92030319	TG>-	BTAF1	UTR3	UCEC	GAAACTA	+	RBM3	Gain	1	530	0.00188679245283019
10	92030319	CA>-	BTAF1	UTR3	UCEC	TTAGTTT	-	ELAVL1,SFPQ,BOLL	Gain	1	530	0.00188679245283019
10	92030319	CA>-	BTAF1	UTR3	UCEC	TTTAGTT	-	ELAVL1,fne	Gain	1	530	0.00188679245283019
10	92030319	CA>-	BTAF1	UTR3	UCEC	TTTTAC	-	KHDRBS1	Loss	1	530	0.00188679245283019
11	103120446	C>A	DYNC2H1	splicing	UCEC	ACATAAA	-	HNRNPL	Gain	1	530	0.00188679245283019
11	103120446	G>T	DYNC2H1	splicing	UCEC	AGGTCT	+	ZRANB2	Loss	1	530	0.00188679245283019
11	103120446	C>A	DYNC2H1	splicing	UCEC	ATAAAA	-	KHDRBS3,PPIE,KHDRBS1	Gain	1	530	0.00188679245283019
11	103120446	C>A	DYNC2H1	splicing	UCEC	CTAAAA	-	KHDRBS1	Loss	1	530	0.00188679245283019
11	103120446	G>T	DYNC2H1	splicing	UCEC	TTTTAT	+	PPIE	Gain	1	530	0.00188679245283019
11	103133554	C>A	DYNC2H1	splicing	UCEC	AATTAT	-	PPIE	Gain	1	530	0.00188679245283019
11	103133554	G>T	DYNC2H1	splicing	UCEC	ATAATT	+	PPIE	Gain	1	530	0.00188679245283019
11	103133554	G>T	DYNC2H1	splicing	UCEC	ATAGAA	+	HNRNPA1	Loss	1	530	0.00188679245283019
11	103133554	G>T	DYNC2H1	splicing	UCEC	ATATAA	+	PPIE	Gain	1	530	0.00188679245283019
11	103133554	C>A	DYNC2H1	splicing	UCEC	ATTATA	-	PPIE	Gain	1	530	0.00188679245283019
11	103133554	G>T	DYNC2H1	splicing	UCEC	CATATA	+	RBMS3	Gain	1	530	0.00188679245283019
11	103133554	C>A	DYNC2H1	splicing	UCEC	GAATTA	-	TRA2B*	Gain	1	530	0.00188679245283019
11	103133554	G>T	DYNC2H1	splicing	UCEC	GAATTCA	+	IGF2BP2	Loss	1	530	0.00188679245283019
11	103133554	G>T	DYNC2H1	splicing	UCEC	TATAAT	+	PPIE	Gain	1	530	0.00188679245283019
11	103133554	C>A	DYNC2H1	splicing	UCEC	TTATAT	-	PPIE	Gain	1	530	0.00188679245283019
11	103154810	G>T	DYNC2H1	splicing	UCEC	AAATTA	+	PPIE	Gain	1	530	0.00188679245283019
11	103154810	G>T	DYNC2H1	splicing	UCEC	AAATTAA	+	KHDRBS2	Gain	1	530	0.00188679245283019
11	103154810	G>T	DYNC2H1	splicing	UCEC	AATTAA	+	PPIE	Gain	1	530	0.00188679245283019
11	103154810	C>A	DYNC2H1	splicing	UCEC	AATTTA	-	HNRNPDL,DAZAP1,HNRNPA2B1,HNRNPD,HNRNPA1,HNRNPA0,PPIE	Gain	1	530	0.00188679245283019
11	103154810	G>T	DYNC2H1	splicing	UCEC	ATAAAG	+	KHDRBS3	Loss	1	530	0.00188679245283019
11	103154810	G>T	DYNC2H1	splicing	UCEC	ATAAAT	+	PPIE	Gain	1	530	0.00188679245283019
11	103154810	C>A	DYNC2H1	splicing	UCEC	ATTTAT	-	PPIE	Gain	1	530	0.00188679245283019
11	103154810	G>T	DYNC2H1	splicing	UCEC	TAAATT	+	PPIE	Gain	1	530	0.00188679245283019
11	103154810	C>A	DYNC2H1	splicing	UCEC	TAATTT	-	PPIE	Gain	1	530	0.00188679245283019
11	103154810	C>A	DYNC2H1	splicing	UCEC	TTAATT	-	PPIE	Gain	1	530	0.00188679245283019
11	103154810	C>A	DYNC2H1	splicing	UCEC	TTAATTT	-	SFPQ	Gain	1	530	0.00188679245283019
11	103154810	C>A	DYNC2H1	splicing	UCEC	TTACTTT	-	PTBP1,RBM41,RBM41	Loss	1	530	0.00188679245283019
11	103155330	C>A	DYNC2H1	splicing	UCEC	GATCTG	-	YBX1	Loss	1	530	0.00188679245283019
11	103155330	C>A	DYNC2H1	splicing	UCEC	TATGTT	-	CELF2	Gain	1	530	0.00188679245283019
11	103173081	G>T	DYNC2H1	splicing	UCEC	AGGTAG	+	ZRANB2	Loss	1	530	0.00188679245283019
11	103173081	C>A	DYNC2H1	splicing	UCEC	CCTGAAA	-	TRA2A	Loss	1	530	0.00188679245283019
11	103173081	G>T	DYNC2H1	splicing	UCEC	TTTCAGG	+	SRSF6	Loss	1	530	0.00188679245283019
11	103179235	T>C	DYNC2H1	splicing	UCEC	AGGTAA	+	ZRANB2,RBM5,ZRANB2	Loss	1	530	0.00188679245283019
11	103179235	A>G	DYNC2H1	splicing	UCEC	GCTTGC	-	MBNL1	Gain	1	530	0.00188679245283019
11	103179235	T>C	DYNC2H1	splicing	UCEC	TAGGCA	+	HNRNPA1	Gain	1	530	0.00188679245283019
11	103179235	T>C	DYNC2H1	splicing	UCEC	TAGGTA	+	KHSRP,HNRNPA1	Loss	1	530	0.00188679245283019
11	103179235	T>C	DYNC2H1	splicing	UCEC	TAGGTAA	+	DAZAP1	Loss	1	530	0.00188679245283019
11	103179235	A>G	DYNC2H1	splicing	UCEC	TTGCCT	-	MBNL1	Gain	1	530	0.00188679245283019
11	103184895	G>T	DYNC2H1	splicing	UCEC	GAATGA	+	TARDBP	Loss	1	530	0.00188679245283019
11	103184895	C>A	DYNC2H1	splicing	UCEC	TATGTT	-	CELF2	Gain	1	530	0.00188679245283019
11	103185053	A>G	DYNC2H1	splicing	UCEC	ACCTCT	-	ZFP36	Loss	1	530	0.00188679245283019
11	103185053	T>C	DYNC2H1	splicing	UCEC	AGAGGTA	+	SFPQ	Loss	1	530	0.00188679245283019
11	103185053	T>C	DYNC2H1	splicing	UCEC	AGGTAA	+	ZRANB2,RBM5,ZRANB2	Loss	1	530	0.00188679245283019
11	103185053	T>C	DYNC2H1	splicing	UCEC	TAATGC	+	YTHDC1	Loss	1	530	0.00188679245283019
11	103185053	A>G	DYNC2H1	splicing	UCEC	TTGCCT	-	MBNL1	Gain	1	530	0.00188679245283019
11	103219914	C>T	DYNC2H1	splicing	UCEC	CATCTTA	-	MATR3	Gain	1	530	0.00188679245283019
11	103219914	G>A	DYNC2H1	splicing	UCEC	GGATGC	+	YTHDC1	Loss	1	530	0.00188679245283019
11	103219914	G>A	DYNC2H1	splicing	UCEC	TAGGAT	+	HNRNPA1	Loss	1	530	0.00188679245283019
11	103219914	G>A	DYNC2H1	splicing	UCEC	TAGGATG	+	DAZAP1	Loss	1	530	0.00188679245283019
11	103219914	G>A	DYNC2H1	splicing	UCEC	TTATAA	+	PPIE	Gain	1	530	0.00188679245283019
11	103219914	C>T	DYNC2H1	splicing	UCEC	TTATAA	-	PPIE	Gain	1	530	0.00188679245283019
11	103223087	G>A	DYNC2H1	splicing	UCEC	AATCATA	+	RBM46	Gain	2	530	0.00377358490566038
11	103223087	C>T	DYNC2H1	splicing	UCEC	ACTTAT	-	SF1,QKI	Gain	2	530	0.00377358490566038
11	103223087	G>A	DYNC2H1	splicing	UCEC	ATCGTA	+	SRSF6	Loss	2	530	0.00377358490566038
11	103234033	C>A	DYNC2H1	splicing	UCEC	AAATAT	-	PPIE	Gain	1	530	0.00188679245283019
11	103234033	C>A	DYNC2H1	splicing	UCEC	AATATA	-	RBMS3,PPIE	Gain	1	530	0.00188679245283019
11	103234033	C>A	DYNC2H1	splicing	UCEC	AATATAT	-	RBMS3	Gain	1	530	0.00188679245283019
11	103234033	G>T	DYNC2H1	splicing	UCEC	ATATAT	+	PPIE	Gain	1	530	0.00188679245283019
11	103234033	C>A	DYNC2H1	splicing	UCEC	ATATAT	-	PPIE	Gain	1	530	0.00188679245283019
11	103234033	G>T	DYNC2H1	splicing	UCEC	ATATTT	+	PPIE	Gain	1	530	0.00188679245283019
11	103234033	G>T	DYNC2H1	splicing	UCEC	CATATA	+	RBMS3	Gain	1	530	0.00188679245283019
11	103234033	G>T	DYNC2H1	splicing	UCEC	TAGATTT	+	MSI1	Loss	1	530	0.00188679245283019
11	103234033	G>T	DYNC2H1	splicing	UCEC	TATATT	+	PPIE	Gain	1	530	0.00188679245283019
11	103307832	G>A	DYNC2H1	splicing	UCEC	AGGTAA	+	ZRANB2,RBM5,ZRANB2	Loss	1	530	0.00188679245283019
11	103307832	G>A	DYNC2H1	splicing	UCEC	TATGAGG	+	pUf68	Loss	1	530	0.00188679245283019
11	103323885	C>A	DYNC2H1	splicing	UCEC	ATAAAT	-	PPIE	Gain	1	530	0.00188679245283019
11	103323885	G>T	DYNC2H1	splicing	UCEC	ATTTAT	+	PPIE	Gain	1	530	0.00188679245283019
11	103323885	C>A	DYNC2H1	splicing	UCEC	CTAAAT	-	KHDRBS1	Loss	1	530	0.00188679245283019
11	103323885	G>T	DYNC2H1	splicing	UCEC	TATTTAT	+	ZFP36	Gain	1	530	0.00188679245283019
11	103323885	G>T	DYNC2H1	splicing	UCEC	TTAGGA	+	HNRNPD,PCBP2,PCBP1	Loss	1	530	0.00188679245283019
11	103479257	C>A	DYNC2H1	UTR3	UCEC	AATATA	+	RBMS3,PPIE	Gain	1	530	0.00188679245283019
11	103479257	C>A	DYNC2H1	UTR3	UCEC	AATATAA	+	A1CF	Gain	1	530	0.00188679245283019
11	103479257	C>A	DYNC2H1	UTR3	UCEC	ATATAA	+	PPIE	Gain	1	530	0.00188679245283019
11	103479257	G>T	DYNC2H1	UTR3	UCEC	ATTATA	-	PPIE	Gain	1	530	0.00188679245283019
11	103479257	C>A	DYNC2H1	UTR3	UCEC	TATAAT	+	PPIE	Gain	1	530	0.00188679245283019
11	103479257	G>T	DYNC2H1	UTR3	UCEC	TATATT	-	PPIE	Gain	1	530	0.00188679245283019
11	103479257	G>T	DYNC2H1	UTR3	UCEC	TTATAT	-	PPIE	Gain	1	530	0.00188679245283019
11	103479286	->AAGCT	DYNC2H1	UTR3	UCEC	AAAGGGA	+	SRSF10	Loss	1	530	0.00188679245283019
11	103479286	->AAGCT	DYNC2H1	UTR3	UCEC	CAAAAAG	+	ENSXETG00000018075	Gain	1	530	0.00188679245283019
11	103479286	->AGCTT	DYNC2H1	UTR3	UCEC	CCCTTT	-	ZFP36	Loss	1	530	0.00188679245283019
11	103479286	->AGCTT	DYNC2H1	UTR3	UCEC	CCTTTT	-	ZFP36	Loss	1	530	0.00188679245283019
11	103479286	->AGCTT	DYNC2H1	UTR3	UCEC	CTTTTG	-	TIAL1,TIA1	Loss	1	530	0.00188679245283019
11	103479286	->AGCTT	DYNC2H1	UTR3	UCEC	CTTTTT	-	ELAVL2	Gain	1	530	0.00188679245283019
11	103479286	->AGCTT	DYNC2H1	UTR3	UCEC	CTTTTTG	-	TIAL1,HNRNPC,ELAVL2,HNRNPCL1	Gain	1	530	0.00188679245283019
11	103479286	->AAGCT	DYNC2H1	UTR3	UCEC	TAGGGA	+	HNRNPA1	Gain	1	530	0.00188679245283019
11	103479286	->AGCTT	DYNC2H1	UTR3	UCEC	TCCCTA	-	HNRNPK	Gain	1	530	0.00188679245283019
11	103479286	->AGCTT	DYNC2H1	UTR3	UCEC	TCCCTT	-	HNRNPK	Loss	1	530	0.00188679245283019
11	103479286	->AGCTT	DYNC2H1	UTR3	UCEC	TTTTTG	-	HNRNPC	Gain	1	530	0.00188679245283019
11	103479286	->AGCTT	DYNC2H1	UTR3	UCEC	TTTTTGT	-	TIA1	Gain	1	530	0.00188679245283019
11	108227775	G>T	ATM	splicing	UCEC	ATAAAG	+	KHDRBS3	Gain	1	530	0.00188679245283019
11	108227775	C>A	ATM	splicing	UCEC	ATGAAAA	-	SRSF9	Gain	1	530	0.00188679245283019
11	108227775	G>T	ATM	splicing	UCEC	GAAAGAA	+	SRSF10	Loss	1	530	0.00188679245283019
11	108227775	G>T	ATM	splicing	UCEC	GAAAGAAG	+	TRA2B	Loss	1	530	0.00188679245283019
11	108227775	C>A	ATM	splicing	UCEC	TCTTTC	-	ZFP36	Loss	1	530	0.00188679245283019
11	108227775	C>A	ATM	splicing	UCEC	TCTTTCT	-	PTBP1,PTBP3	Loss	1	530	0.00188679245283019
11	108227775	G>T	ATM	splicing	UCEC	TTTCAGA	+	ERI1	Loss	1	530	0.00188679245283019
11	108287482	G>A	ATM	intronic	UCEC	AAATAA	-	PPIE	Gain	1	530	0.00188679245283019
11	108287482	G>A	ATM	intronic	UCEC	AAATAAA	-	KHDRBS3,HNRNPL,KHDRBS3	Gain	1	530	0.00188679245283019
11	108287482	G>A	ATM	intronic	UCEC	AATAAA	-	PPIE	Gain	1	530	0.00188679245283019
11	108287482	G>A	ATM	intronic	UCEC	ATAAAT	-	PPIE	Gain	1	530	0.00188679245283019
11	108287482	C>T	ATM	intronic	UCEC	ATTTAT	+	PPIE	Gain	1	530	0.00188679245283019
11	108287482	C>T	ATM	intronic	UCEC	ATTTATTT	+	HNRNPA1	Gain	1	530	0.00188679245283019
11	108287482	C>T	ATM	intronic	UCEC	ATTTATTTT	+	ELAVL2	Gain	1	530	0.00188679245283019
11	108287482	C>T	ATM	intronic	UCEC	TTATTT	+	PPIE	Gain	1	530	0.00188679245283019
11	108287482	C>T	ATM	intronic	UCEC	TTATTTT	+	ELAVL1,BOLL,ELAVL1	Gain	1	530	0.00188679245283019
11	108287482	C>T	ATM	intronic	UCEC	TTTATT	+	PPIE	Gain	1	530	0.00188679245283019
11	108287482	C>T	ATM	intronic	UCEC	TTTATTT	+	ELAVL1,ELAVL4,FUBP1,RBM15B,TIA1	Gain	1	530	0.00188679245283019
11	108287482	C>T	ATM	intronic	UCEC	TTTATTTT	+	KHSRP	Gain	1	530	0.00188679245283019
11	108287534	T>G	ATM	intronic	UCEC	ATGCCG	+	MBNL1	Gain	1	530	0.00188679245283019
11	108287534	T>G	ATM	intronic	UCEC	CCTTTT	+	ZFP36	Loss	1	530	0.00188679245283019
11	108287534	T>G	ATM	intronic	UCEC	CTTTTG	+	TIAL1,TIA1	Loss	1	530	0.00188679245283019
11	108287534	A>C	ATM	intronic	UCEC	TCAAAA	-	RBMX	Loss	1	530	0.00188679245283019
11	108287534	A>C	ATM	intronic	UCEC	TCAAAAG	-	sf3b4	Loss	1	530	0.00188679245283019
11	108287534	T>G	ATM	intronic	UCEC	TGCCGTT	+	SRSF2	Gain	1	530	0.00188679245283019
11	108287552	T>C	ATM	intronic	UCEC	ACGCTC	+	MBNL1	Gain	1	530	0.00188679245283019
11	108287552	T>C	ATM	intronic	UCEC	ACGCTCA	+	SRSF1	Gain	1	530	0.00188679245283019
11	108287599	G>T	ATM	splicing	UCEC	TGCAGA	+	SRSF5	Loss	1	530	0.00188679245283019
11	108287599	G>T	ATM	splicing	UCEC	TGCATA	+	SRSF5	Gain	1	530	0.00188679245283019
11	108295129	G>A	ATM	intronic	UCEC	AAGAAC	-	TRA2B	Gain	1	530	0.00188679245283019
11	108295129	G>A	ATM	intronic	UCEC	ACAAGAC	-	RBMY1A1	Gain	1	530	0.00188679245283019
11	108295129	G>A	ATM	intronic	UCEC	AGAACAA	-	egw109003261	Gain	1	530	0.00188679245283019
11	108295129	C>T	ATM	intronic	UCEC	CTCTTG	+	PTBP1	Loss	1	530	0.00188679245283019
11	108295129	C>T	ATM	intronic	UCEC	GTCTTGT	+	CELF1	Gain	1	530	0.00188679245283019
11	108295129	C>T	ATM	intronic	UCEC	TCTTGC	+	ZFP36	Loss	1	530	0.00188679245283019
11	108295129	C>T	ATM	intronic	UCEC	TCTTGT	+	ZFP36	Gain	1	530	0.00188679245283019
11	108295129	C>T	ATM	intronic	UCEC	TGTTCTT	+	ZNF638	Gain	1	530	0.00188679245283019
11	108295129	C>T	ATM	intronic	UCEC	TTCTTG	+	PTBP1	Gain	1	530	0.00188679245283019
11	108295129	C>T	ATM	intronic	UCEC	TTGCTC	+	MBNL1	Loss	1	530	0.00188679245283019
11	108295193	->A	ATM	intronic	UCEC	ATGAGAA	-	SRSF9	Loss	1	530	0.00188679245283019
11	108295193	->A	ATM	intronic	UCEC	GAAGAA	-	SRSF1,TRA2B	Gain	1	530	0.00188679245283019
11	108295193	->A	ATM	intronic	UCEC	GATGAAG	-	RBM46	Gain	1	530	0.00188679245283019
11	108295193	->T	ATM	intronic	UCEC	TCTTCA	+	SRSF7	Gain	1	530	0.00188679245283019
11	108295193	->A	ATM	intronic	UCEC	TGAAGAA	-	SRSF1	Gain	1	530	0.00188679245283019
11	108295193	->T	ATM	intronic	UCEC	TTCTTC	+	PTBP1	Gain	1	530	0.00188679245283019
11	108295193	->T	ATM	intronic	UCEC	TTCTTCAT	+	SRSF3	Gain	1	530	0.00188679245283019
11	108295196	G>-	ATM	intronic	UCEC	AGTTAG	-	HNRNPA1	Loss	1	530	0.00188679245283019
11	108295196	C>-	ATM	intronic	UCEC	ATTAAC	+	QKI,SF1	Gain	1	530	0.00188679245283019
11	108295313	A>-	ATM	intronic	UCEC	AAAAAA	-	PPIE	Loss	1	530	0.00188679245283019
11	108295313	A>-	ATM	intronic	UCEC	AAAAAAA	-	ELAVL4,PCBP1,SYNCRIP,HNRNPU,FMR1,RBM5,IGHMBP2,PABPC4,FUS,HNRNPD,SART3,HNRNPK,PABPC1,DAZAP1,HNRNPA1,LmjF354130,PABPC4,PABPC4	Loss	1	530	0.00188679245283019
11	108295313	A>-	ATM	intronic	UCEC	AAAAAAAA	-	IGHMBP2,PABPC1	Loss	1	530	0.00188679245283019
11	108295313	A>-	ATM	intronic	UCEC	AAAAAAAAA	-	AGO2	Loss	1	530	0.00188679245283019
11	108295313	T>-	ATM	intronic	UCEC	TTTTTT	+	KHDRBS1,HNRNPC,DDX19B,EIF4A3,PPIE,CPEB4	Loss	1	530	0.00188679245283019
11	108295313	T>-	ATM	intronic	UCEC	TTTTTTT	+	DAZAP1,TIA1,ELAVL1,ELAVL4,PCBP1,U2AF2,HNRNPCL1,HNRNPA1,HNRNPC,FUS,NOVA1,SFPQ,NOVA2,KHDRBS2,PCBP2,RALY,KHDRBS1,FMR1,ELAVL3,KHDRBS3,HNRNPU,DDX19B,HNRNPK,SYNCRIP,PTBP1,egw103003671,ELAVL1,gw184451,HNRNPC,HNRNPCL1,PUF60,Sxl,TVAG514790	Loss	1	530	0.00188679245283019
11	108295313	T>-	ATM	intronic	UCEC	TTTTTTTTT	+	TIA1	Loss	1	530	0.00188679245283019
11	108297114	T>C	ATM	intronic	UCEC	CTGTTGT	+	Tbg97262300	Loss	1	530	0.00188679245283019
11	108297114	T>C	ATM	intronic	UCEC	GTATTAA	+	ZCRB1	Loss	1	530	0.00188679245283019
11	108297114	A>G	ATM	intronic	UCEC	TAATAC	-	YTHDC1	Loss	1	530	0.00188679245283019
11	108297114	A>G	ATM	intronic	UCEC	TAATGC	-	YTHDC1	Gain	1	530	0.00188679245283019
11	108297114	T>C	ATM	intronic	UCEC	TATTAA	+	PPIE	Loss	1	530	0.00188679245283019
11	108297114	T>C	ATM	intronic	UCEC	TGTTGT	+	CELF2	Loss	1	530	0.00188679245283019
11	108297114	A>G	ATM	intronic	UCEC	TTAATA	-	PPIE	Loss	1	530	0.00188679245283019
11	108297195	T>G	ATM	intronic	UCEC	AAGTGTT	+	RBMX	Gain	1	530	0.00188679245283019
11	108297195	A>C	ATM	intronic	UCEC	AGAAAAC	-	SART3,PABPC1	Loss	1	530	0.00188679245283019
11	108297195	A>C	ATM	intronic	UCEC	GAAAAC	-	KHDRBS1	Loss	1	530	0.00188679245283019
11	108297195	T>G	ATM	intronic	UCEC	GTTCTAG	+	DAZ3	Gain	1	530	0.00188679245283019
11	108297195	T>G	ATM	intronic	UCEC	GTTTTC	+	TIAL1,TIA1,ELAVL2	Loss	1	530	0.00188679245283019
11	108297195	A>C	ATM	intronic	UCEC	TAGAACA	-	SRSF9	Gain	1	530	0.00188679245283019
11	108297206	T>C	ATM	intronic	UCEC	AAATTACC	-	PCBP1,PCBP2	Gain	1	530	0.00188679245283019
11	108297206	T>C	ATM	intronic	UCEC	AAATTAT	-	RBM47	Loss	1	530	0.00188679245283019
11	108297206	T>C	ATM	intronic	UCEC	AATTAT	-	PPIE	Loss	1	530	0.00188679245283019
11	108297206	A>G	ATM	intronic	UCEC	AGGTAA	+	ZRANB2,RBM5,ZRANB2	Gain	1	530	0.00188679245283019
11	108297206	A>G	ATM	intronic	UCEC	ATAATT	+	PPIE	Loss	1	530	0.00188679245283019
11	108297206	T>C	ATM	intronic	UCEC	ATCTGAC	-	HNRNPDL	Loss	1	530	0.00188679245283019
11	108297206	A>G	ATM	intronic	UCEC	GTAATTT	+	SFPQ	Gain	1	530	0.00188679245283019
11	108297217	T>G	ATM	intronic	UCEC	AATATA	+	RBMS3,PPIE	Loss	1	530	0.00188679245283019
11	108297217	T>G	ATM	intronic	UCEC	AATATAT	+	RBMS3	Loss	1	530	0.00188679245283019
11	108297217	T>G	ATM	intronic	UCEC	AGATAT	+	HNRNPA1,HNRNPD,HNRNPA2B1,DAZAP1,HNRNPA0,HNRNPDL	Gain	1	530	0.00188679245283019
11	108297217	T>G	ATM	intronic	UCEC	ATAGATA	+	DAZAP1	Gain	1	530	0.00188679245283019
11	108297217	T>G	ATM	intronic	UCEC	ATATAT	+	PPIE	Loss	1	530	0.00188679245283019
11	108297217	A>C	ATM	intronic	UCEC	ATATAT	-	PPIE	Loss	1	530	0.00188679245283019
11	108297217	T>G	ATM	intronic	UCEC	ATATATA	+	RBMS3,CNOT4,HNRNPD,RBMS3	Loss	1	530	0.00188679245283019
11	108297217	A>C	ATM	intronic	UCEC	ATATATA	-	RBMS3,CNOT4,HNRNPD,RBMS3	Loss	1	530	0.00188679245283019
11	108297217	T>G	ATM	intronic	UCEC	ATATATAT	+	AKAP1	Loss	1	530	0.00188679245283019
11	108297217	A>C	ATM	intronic	UCEC	ATATATAT	-	AKAP1	Loss	1	530	0.00188679245283019
11	108297217	A>C	ATM	intronic	UCEC	ATATTA	-	PPIE	Loss	1	530	0.00188679245283019
11	108297217	A>C	ATM	intronic	UCEC	ATATTAA	-	shep	Loss	1	530	0.00188679245283019
11	108297217	A>C	ATM	intronic	UCEC	CATATA	-	RBMS3	Loss	1	530	0.00188679245283019
11	108297217	T>G	ATM	intronic	UCEC	TAATAT	+	PPIE	Loss	1	530	0.00188679245283019
11	108297217	T>G	ATM	intronic	UCEC	TATATA	+	RBMS3,PPIE	Loss	1	530	0.00188679245283019
11	108297217	A>C	ATM	intronic	UCEC	TATATA	-	RBMS3,PPIE	Loss	1	530	0.00188679245283019
11	108297217	T>G	ATM	intronic	UCEC	TATATAT	+	FUBP3	Loss	1	530	0.00188679245283019
11	108297217	A>C	ATM	intronic	UCEC	TATATAT	-	FUBP3	Loss	1	530	0.00188679245283019
11	108297217	A>C	ATM	intronic	UCEC	TATATT	-	PPIE	Loss	1	530	0.00188679245283019
11	108297217	A>C	ATM	intronic	UCEC	TATATTA	-	RC3H1,shep	Loss	1	530	0.00188679245283019
11	108297279	T>A	ATM	intronic	UCEC	AAAAAA	-	PPIE	Gain	1	530	0.00188679245283019
11	108297279	T>A	ATM	intronic	UCEC	AAAAAT	-	PPIE	Gain	1	530	0.00188679245283019
11	108297279	T>A	ATM	intronic	UCEC	AAAATT	-	PPIE	Gain	1	530	0.00188679245283019
11	108297279	T>A	ATM	intronic	UCEC	AAATAA	-	PPIE	Loss	1	530	0.00188679245283019
11	108297279	A>T	ATM	intronic	UCEC	AAATTA	+	PPIE	Loss	1	530	0.00188679245283019
11	108297279	A>T	ATM	intronic	UCEC	AAATTAT	+	RBM47	Loss	1	530	0.00188679245283019
11	108297279	A>T	ATM	intronic	UCEC	AAATTT	+	PPIE	Gain	1	530	0.00188679245283019
11	108297279	T>A	ATM	intronic	UCEC	AAATTT	-	PPIE	Gain	1	530	0.00188679245283019
11	108297279	T>A	ATM	intronic	UCEC	AATAAT	-	PPIE,KHDRBS3	Loss	1	530	0.00188679245283019
11	108297279	A>T	ATM	intronic	UCEC	AATTAT	+	PPIE	Loss	1	530	0.00188679245283019
11	108297279	A>T	ATM	intronic	UCEC	AATTTT	+	PPIE	Gain	1	530	0.00188679245283019
11	108297279	T>A	ATM	intronic	UCEC	AGAAAAA	-	PABPC1,SART3,PABPC1,SART3,Tbg97295210,TVAG002940	Gain	1	530	0.00188679245283019
11	108297279	T>A	ATM	intronic	UCEC	ATAATT	-	PPIE	Loss	1	530	0.00188679245283019
11	108297279	A>T	ATM	intronic	UCEC	ATTATT	+	PPIE	Loss	1	530	0.00188679245283019
11	108297279	A>T	ATM	intronic	UCEC	ATTTTT	+	PPIE	Gain	1	530	0.00188679245283019
11	108297279	A>T	ATM	intronic	UCEC	ATTTTTT	+	HNRNPCL1,HNRNPC,TIA1,PTBP1,BOLL,HNRNPC,HNRNPCL1,Smp067420,HNRNPC,HNRNPCL1	Gain	1	530	0.00188679245283019
11	108297279	T>A	ATM	intronic	UCEC	TAATTT	-	PPIE	Loss	1	530	0.00188679245283019
11	108297279	A>T	ATM	intronic	UCEC	TTATTT	+	PPIE	Loss	1	530	0.00188679245283019
11	108297279	A>T	ATM	intronic	UCEC	TTTTTC	+	HNRNPC	Gain	1	530	0.00188679245283019
11	108297279	A>T	ATM	intronic	UCEC	TTTTTCT	+	TIA1,PTBP1	Gain	1	530	0.00188679245283019
11	108297279	A>T	ATM	intronic	UCEC	TTTTTT	+	KHDRBS1,HNRNPC,DDX19B,EIF4A3,PPIE,CPEB4	Gain	1	530	0.00188679245283019
11	108297279	A>T	ATM	intronic	UCEC	TTTTTTC	+	RALY,U2AF2,TIA1,TIA1,U2AF2,U2af50,U2AF2	Gain	1	530	0.00188679245283019
11	108315821	T>C	ATM	splicing	UCEC	CCTGAAA	-	TRA2A	Loss	1	530	0.00188679245283019
11	108315821	T>C	ATM	splicing	UCEC	TCCCGA	-	HNRNPK	Gain	1	530	0.00188679245283019
11	108315821	A>G	ATM	splicing	UCEC	TTTCAGG	+	SRSF6	Loss	1	530	0.00188679245283019
11	108327760	T>A	ATM	splicing	UCEC	AAAGGAA	+	SRSF10,NUPL2	Gain	1	530	0.00188679245283019
11	108327760	A>T	ATM	splicing	UCEC	AATCTTA	-	MATR3	Loss	1	530	0.00188679245283019
11	108327760	A>T	ATM	splicing	UCEC	ACCTTT	-	ZFP36	Loss	1	530	0.00188679245283019
11	108327760	T>A	ATM	splicing	UCEC	AGGAAAG	+	SRSF9	Gain	1	530	0.00188679245283019
11	108327760	T>A	ATM	splicing	UCEC	AGGTAA	+	ZRANB2,RBM5,ZRANB2	Loss	1	530	0.00188679245283019
11	108327760	A>T	ATM	splicing	UCEC	TCCTTT	-	ZFP36	Gain	1	530	0.00188679245283019
11	108327760	A>T	ATM	splicing	UCEC	TCTTTC	-	ZFP36	Gain	1	530	0.00188679245283019
11	108365618	T>G	ATM	UTR3	UCEC	AGTGTGG	+	RBM24,CG7804	Gain	1	530	0.00188679245283019
11	108365618	T>G	ATM	UTR3	UCEC	TTGTGG	+	ZFP36	Loss	1	530	0.00188679245283019
11	108365687	T>C	ATM	UTR3	UCEC	GTCTTA	+	PTBP1	Loss	1	530	0.00188679245283019
11	108365687	A>G	ATM	UTR3	UCEC	TAAGAC	-	RBMX	Loss	1	530	0.00188679245283019
11	108367639	T>G	ATM	UTR3	UCEC	AAAATT	-	PPIE	Loss	2	530	0.00377358490566038
11	108367639	A>C	ATM	UTR3	UCEC	AAATTT	+	PPIE	Loss	2	530	0.00377358490566038
11	108367639	T>G	ATM	UTR3	UCEC	AAATTT	-	PPIE	Loss	2	530	0.00377358490566038
11	108367639	T>G	ATM	UTR3	UCEC	AATTTA	-	HNRNPDL,DAZAP1,HNRNPA2B1,HNRNPD,HNRNPA1,HNRNPA0,PPIE	Loss	2	530	0.00377358490566038
11	108367639	A>C	ATM	UTR3	UCEC	AATTTT	+	PPIE	Loss	2	530	0.00377358490566038
11	108367639	A>C	ATM	UTR3	UCEC	ACATTTT	+	LmjF180180	Gain	2	530	0.00377358490566038
11	108367639	A>C	ATM	UTR3	UCEC	ATAAAT	+	PPIE	Loss	2	530	0.00377358490566038
11	108367639	A>C	ATM	UTR3	UCEC	ATACATT	+	RBM41	Gain	2	530	0.00377358490566038
11	108367639	A>C	ATM	UTR3	UCEC	ATATAA	+	PPIE	Loss	2	530	0.00377358490566038
11	108367639	T>G	ATM	UTR3	UCEC	ATGTATA	-	KHSRP	Gain	2	530	0.00377358490566038
11	108367639	T>G	ATM	UTR3	UCEC	ATGTATAT	-	KHSRP	Gain	2	530	0.00377358490566038
11	108367639	T>G	ATM	UTR3	UCEC	ATTTAT	-	PPIE	Loss	2	530	0.00377358490566038
11	108367639	T>G	ATM	UTR3	UCEC	ATTTATATA	-	ELAVL2	Loss	2	530	0.00377358490566038
11	108367639	A>C	ATM	UTR3	UCEC	CATTTTT	+	CPEB2,HNRNPC,RALYL	Gain	2	530	0.00377358490566038
11	108367639	A>C	ATM	UTR3	UCEC	TAAATT	+	PPIE	Loss	2	530	0.00377358490566038
11	108367639	A>C	ATM	UTR3	UCEC	TATAAA	+	PPIE	Loss	2	530	0.00377358490566038
11	108367639	A>C	ATM	UTR3	UCEC	TATATAC	+	RBMS1	Gain	2	530	0.00377358490566038
11	108367639	T>G	ATM	UTR3	UCEC	TGTATAT	-	PUM1	Gain	2	530	0.00377358490566038
11	108367639	T>G	ATM	UTR3	UCEC	TGTATATA	-	PUM2,PUM1,PUM2	Gain	2	530	0.00377358490566038
11	108367639	T>G	ATM	UTR3	UCEC	TTATAT	-	PPIE	Loss	2	530	0.00377358490566038
11	108367639	T>G	ATM	UTR3	UCEC	TTTATA	-	PPIE,HNRNPA2B1,HNRNPA1	Loss	2	530	0.00377358490566038
11	108367641	A>-	ATM	UTR3	UCEC	AAAAAA	-	PPIE	Loss	1	530	0.00188679245283019
11	108367641	A>-	ATM	UTR3	UCEC	AAAAAAA	-	ELAVL4,PCBP1,SYNCRIP,HNRNPU,FMR1,RBM5,IGHMBP2,PABPC4,FUS,HNRNPD,SART3,HNRNPK,PABPC1,DAZAP1,HNRNPA1,LmjF354130,PABPC4,PABPC4	Loss	1	530	0.00188679245283019
11	108367641	T>-	ATM	UTR3	UCEC	ATTTTTTTC	+	TIAL1	Loss	1	530	0.00188679245283019
11	108367641	T>-	ATM	UTR3	UCEC	TTTTTT	+	KHDRBS1,HNRNPC,DDX19B,EIF4A3,PPIE,CPEB4	Loss	1	530	0.00188679245283019
11	108367641	T>-	ATM	UTR3	UCEC	TTTTTTT	+	DAZAP1,TIA1,ELAVL1,ELAVL4,PCBP1,U2AF2,HNRNPCL1,HNRNPA1,HNRNPC,FUS,NOVA1,SFPQ,NOVA2,KHDRBS2,PCBP2,RALY,KHDRBS1,FMR1,ELAVL3,KHDRBS3,HNRNPU,DDX19B,HNRNPK,SYNCRIP,PTBP1,egw103003671,ELAVL1,gw184451,HNRNPC,HNRNPCL1,PUF60,Sxl,TVAG514790	Loss	1	530	0.00188679245283019
11	108367668	G>T	ATM	UTR3	UCEC	AAAAAT	-	PPIE	Gain	2	530	0.00377358490566038
11	108367668	G>T	ATM	UTR3	UCEC	AAAAATA	-	NUPL2,PABPN1L	Gain	2	530	0.00377358490566038
11	108367668	G>T	ATM	UTR3	UCEC	AAAAGA	-	PABPN1	Loss	2	530	0.00377358490566038
11	108367668	G>T	ATM	UTR3	UCEC	AAAAGAA	-	SRSF10	Loss	2	530	0.00377358490566038
11	108367668	G>T	ATM	UTR3	UCEC	AAAATA	-	PPIE	Gain	2	530	0.00377358490566038
11	108367668	G>T	ATM	UTR3	UCEC	AAAGAAA	-	SRSF10	Loss	2	530	0.00377358490566038
11	108367668	G>T	ATM	UTR3	UCEC	AAATAA	-	PPIE	Gain	2	530	0.00377358490566038
11	108367668	G>T	ATM	UTR3	UCEC	AAATAAA	-	KHDRBS3,HNRNPL,KHDRBS3	Gain	2	530	0.00377358490566038
11	108367668	G>T	ATM	UTR3	UCEC	AATAAA	-	PPIE	Gain	2	530	0.00377358490566038
11	108367668	G>T	ATM	UTR3	UCEC	ATAAAT	-	PPIE	Gain	2	530	0.00377358490566038
11	108367668	C>A	ATM	UTR3	UCEC	ATTTAT	+	PPIE	Gain	2	530	0.00377358490566038
11	108367668	C>A	ATM	UTR3	UCEC	ATTTATTT	+	HNRNPA1	Gain	2	530	0.00377358490566038
11	108367668	C>A	ATM	UTR3	UCEC	ATTTATTTT	+	ELAVL2	Gain	2	530	0.00377358490566038
11	108367668	C>A	ATM	UTR3	UCEC	ATTTTT	+	PPIE	Gain	2	530	0.00377358490566038
11	108367668	C>A	ATM	UTR3	UCEC	ATTTTTA	+	ELAVL2,TIAL1,TRNAU1AP	Gain	2	530	0.00377358490566038
11	108367668	C>A	ATM	UTR3	UCEC	CTTTTT	+	ELAVL2	Loss	2	530	0.00377358490566038
11	108367668	C>A	ATM	UTR3	UCEC	CTTTTTA	+	TIAL1,TIA1,ELAVL2,HNRNPCL1	Loss	2	530	0.00377358490566038
11	108367668	C>A	ATM	UTR3	UCEC	TATTTT	+	PPIE	Gain	2	530	0.00377358490566038
11	108367668	C>A	ATM	UTR3	UCEC	TATTTTT	+	TRNAU1AP	Gain	2	530	0.00377358490566038
11	108367668	C>A	ATM	UTR3	UCEC	TCTTTT	+	ZFP36	Loss	2	530	0.00377358490566038
11	108367668	C>A	ATM	UTR3	UCEC	TCTTTTT	+	PTBP1	Loss	2	530	0.00377358490566038
11	108367668	C>A	ATM	UTR3	UCEC	TTATTT	+	PPIE	Gain	2	530	0.00377358490566038
11	108367668	C>A	ATM	UTR3	UCEC	TTATTTT	+	ELAVL1,BOLL,ELAVL1	Gain	2	530	0.00377358490566038
11	108367668	C>A	ATM	UTR3	UCEC	TTCTTT	+	PTBP1	Loss	2	530	0.00377358490566038
11	108367668	C>A	ATM	UTR3	UCEC	TTCTTTT	+	PTBP1	Loss	2	530	0.00377358490566038
11	108367668	C>A	ATM	UTR3	UCEC	TTTATT	+	PPIE	Gain	2	530	0.00377358490566038
11	108367668	C>A	ATM	UTR3	UCEC	TTTATTT	+	ELAVL1,ELAVL4,FUBP1,RBM15B,TIA1	Gain	2	530	0.00377358490566038
11	108367668	C>A	ATM	UTR3	UCEC	TTTATTTT	+	KHSRP	Gain	2	530	0.00377358490566038
11	108367668	C>A	ATM	UTR3	UCEC	TTTCTTT	+	PTBP1,RALYL	Loss	2	530	0.00377358490566038
11	108367679	C>A	ATM	UTR3	UCEC	CCAATGG	+	SRSF1	Loss	1	530	0.00188679245283019
11	108367679	C>A	ATM	UTR3	UCEC	TTGCCA	+	MBNL1	Loss	1	530	0.00188679245283019
11	108367764	G>T	ATM	UTR3	UCEC	AATAAA	-	PPIE	Gain	1	530	0.00188679245283019
11	108367764	C>A	ATM	UTR3	UCEC	AATTTA	+	HNRNPDL,DAZAP1,HNRNPA2B1,HNRNPD,HNRNPA1,HNRNPA0,PPIE	Gain	1	530	0.00188679245283019
11	108367764	G>T	ATM	UTR3	UCEC	AGAAATT	-	PABPC5	Loss	1	530	0.00188679245283019
11	108367764	G>T	ATM	UTR3	UCEC	ATAAAT	-	PPIE	Gain	1	530	0.00188679245283019
11	108367764	C>A	ATM	UTR3	UCEC	ATTTAT	+	PPIE	Gain	1	530	0.00188679245283019
11	108367764	G>T	ATM	UTR3	UCEC	GAAATTT	-	CG17838	Loss	1	530	0.00188679245283019
11	108367764	G>T	ATM	UTR3	UCEC	TAAATT	-	PPIE	Gain	1	530	0.00188679245283019
11	108367764	C>A	ATM	UTR3	UCEC	TTCTTG	+	PTBP1	Loss	1	530	0.00188679245283019
11	108367764	C>A	ATM	UTR3	UCEC	TTTATT	+	PPIE	Gain	1	530	0.00188679245283019
11	108367823	T>C	ATM	UTR3	UCEC	AAACTCA	+	IGF2BP2,IGF2BP3	Gain	1	530	0.00188679245283019
11	108367823	A>G	ATM	UTR3	UCEC	AAGGTG	-	HNRNPH2,HNRNPH1,HNRNPH3,HNRNPF,SRSF1,HNRNPA1	Gain	1	530	0.00188679245283019
11	108367823	A>G	ATM	UTR3	UCEC	AGGTAA	-	ZRANB2,RBM5,ZRANB2	Loss	1	530	0.00188679245283019
11	118439107	G>A	KMT2A	intronic	UCEC	GGAGTT	+	SRSF2	Loss	1	530	0.00188679245283019
11	118439107	C>T	KMT2A	intronic	UCEC	TCATGC	-	YTHDC1	Gain	1	530	0.00188679245283019
11	118439107	G>A	KMT2A	intronic	UCEC	TGCATGA	+	RBFOX1,asd1,fox1	Gain	1	530	0.00188679245283019
11	118439107	G>A	KMT2A	intronic	UCEC	TGGAGT	+	SRSF2	Loss	1	530	0.00188679245283019
11	118439111	A>G	KMT2A	intronic	UCEC	CACCGAC	-	SF1*	Gain	1	530	0.00188679245283019
11	118439111	T>C	KMT2A	intronic	UCEC	GGAGTT	+	SRSF2	Loss	1	530	0.00188679245283019
11	118439111	T>C	KMT2A	intronic	UCEC	TGGTGC	+	YTHDC1	Loss	1	530	0.00188679245283019
11	118439111	T>C	KMT2A	intronic	UCEC	TGGTGCT	+	SRSF1	Loss	1	530	0.00188679245283019
11	118468774	G>T	KMT2A	splicing	UCEC	AGGATGA	+	G3BP2	Loss	1	530	0.00188679245283019
11	118468774	C>A	KMT2A	splicing	UCEC	CATCAT	-	SRSF3	Gain	1	530	0.00188679245283019
11	118468774	C>A	KMT2A	splicing	UCEC	CTACAAC	-	SRSF3	Loss	1	530	0.00188679245283019
11	118468774	G>T	KMT2A	splicing	UCEC	TAGGAT	+	HNRNPA1	Loss	1	530	0.00188679245283019
11	118468774	G>T	KMT2A	splicing	UCEC	TAGGATG	+	DAZAP1	Loss	1	530	0.00188679245283019
11	118468774	C>A	KMT2A	splicing	UCEC	TCATAC	-	YTHDC1	Gain	1	530	0.00188679245283019
11	118468774	C>A	KMT2A	splicing	UCEC	TCCTAC	-	YTHDC1	Loss	1	530	0.00188679245283019
11	1235084	G>A	MUC5B	splicing	UCEC	AACACC	+	NOVA2,NOVA1	Gain	1	530	0.00188679245283019
11	1235084	G>A	MUC5B	splicing	UCEC	AGCACC	+	NOVA1,NOVA2	Loss	1	530	0.00188679245283019
11	1235084	C>T	MUC5B	splicing	UCEC	GGTGTTG	-	CELF4	Gain	1	530	0.00188679245283019
11	1235084	C>T	MUC5B	splicing	UCEC	GTGCTG	-	MBNL1	Loss	1	530	0.00188679245283019
11	1235084	G>A	MUC5B	splicing	UCEC	TGCAGC	+	SRSF5	Loss	1	530	0.00188679245283019
11	1235084	C>T	MUC5B	splicing	UCEC	TGCTGC	-	YTHDC1	Loss	1	530	0.00188679245283019
11	1235302	G>T	MUC5B	splicing	UCEC	CAGGAC	+	HNRNPH1,HNRNPH2	Loss	1	530	0.00188679245283019
11	1235302	G>T	MUC5B	splicing	UCEC	CCCAGGA	+	SRSF1	Loss	1	530	0.00188679245283019
11	1235302	G>T	MUC5B	splicing	UCEC	CCCATGA	+	SRSF1	Gain	1	530	0.00188679245283019
11	1235302	G>T	MUC5B	splicing	UCEC	GCCCAG	+	HNRNPK	Loss	1	530	0.00188679245283019
11	1239184	G>T	MUC5B	intronic	UCEC	AGAGGAA	+	SRSF10,SFPQ	Loss	1	530	0.00188679245283019
11	1239184	G>T	MUC5B	intronic	UCEC	CACAGA	+	SRSF5	Loss	1	530	0.00188679245283019
11	1239184	G>T	MUC5B	intronic	UCEC	CACATA	+	SRSF5	Gain	1	530	0.00188679245283019
11	1239184	G>T	MUC5B	intronic	UCEC	CAGAGGA	+	SRSF1	Loss	1	530	0.00188679245283019
11	1239184	G>T	MUC5B	intronic	UCEC	GAGGAAG	+	HNRNPA1	Loss	1	530	0.00188679245283019
11	1239184	G>T	MUC5B	intronic	UCEC	TAGGAA	+	HNRNPA1	Gain	1	530	0.00188679245283019
11	1239184	G>T	MUC5B	intronic	UCEC	TAGGAAG	+	MSI1,DAZAP1	Gain	1	530	0.00188679245283019
11	1239184	C>A	MUC5B	intronic	UCEC	TATGTG	-	CELF2	Gain	1	530	0.00188679245283019
11	1239184	C>A	MUC5B	intronic	UCEC	TCCTCT	-	ZFP36	Loss	1	530	0.00188679245283019
11	1239256	A>G	MUC5B	intronic	UCEC	AGTTCCAGGG	+	SRSF2	Gain	1	530	0.00188679245283019
11	1239256	T>C	MUC5B	intronic	UCEC	CCCTGGA	-	SRSF1	Gain	1	530	0.00188679245283019
11	1239256	T>C	MUC5B	intronic	UCEC	CTTGGAA	-	EIF4B	Loss	1	530	0.00188679245283019
11	1239256	A>G	MUC5B	intronic	UCEC	GTTCCAG	+	SRSF2	Gain	1	530	0.00188679245283019
11	1258329	G>T	MUC5B	splicing	UCEC	AGGACC	+	SRSF1	Loss	1	530	0.00188679245283019
11	1258329	G>T	MUC5B	splicing	UCEC	CAGGAC	+	HNRNPH1,HNRNPH2	Loss	1	530	0.00188679245283019
11	1261726	G>A	MUC5B	UTR3	UCEC	CCCCGCA	+	SRSF1	Gain	1	530	0.00188679245283019
11	1261726	G>A	MUC5B	UTR3	UCEC	CCCCGCG	+	SRSF1	Loss	1	530	0.00188679245283019
11	1261726	C>T	MUC5B	UTR3	UCEC	CGCGGGG	-	SRSF1	Loss	1	530	0.00188679245283019
11	1261726	G>A	MUC5B	UTR3	UCEC	CGCTCCG	+	SRSF1	Loss	1	530	0.00188679245283019
11	1261726	C>T	MUC5B	UTR3	UCEC	CGGAGCG	-	SRSF1	Loss	1	530	0.00188679245283019
11	1261726	C>T	MUC5B	UTR3	UCEC	GAGTGC	-	YTHDC1	Gain	1	530	0.00188679245283019
11	1261726	C>T	MUC5B	UTR3	UCEC	GCGCGGG	-	RBM14,RBM4,RBM4,RBM4,RBM4	Loss	1	530	0.00188679245283019
11	1261726	G>A	MUC5B	UTR3	UCEC	GCGCTC	+	MBNL1	Loss	1	530	0.00188679245283019
11	1261726	C>T	MUC5B	UTR3	UCEC	GGAGCGC	-	ZC3H10	Loss	1	530	0.00188679245283019
11	1261726	C>T	MUC5B	UTR3	UCEC	GGAGTG	-	SRSF2	Gain	1	530	0.00188679245283019
11	1262018	C>T	MUC5B	UTR3	UCEC	CAGCTTCC	-	KHSRP	Loss	1	530	0.00188679245283019
11	1262018	C>T	MUC5B	UTR3	UCEC	TTTCTGG	-	SRSF6	Gain	1	530	0.00188679245283019
11	1262083	G>A	MUC5B	UTR3	UCEC	TCACAAC	+	SRSF3	Gain	1	530	0.00188679245283019
11	62433664	A>C	AHNAK	UTR3	UCEC	AAAGAAA	+	SRSF10	Loss	1	530	0.00188679245283019
11	62433664	T>G	AHNAK	UTR3	UCEC	GTCTTT	-	PTBP1	Gain	1	530	0.00188679245283019
11	62433664	T>G	AHNAK	UTR3	UCEC	TGCATG	-	RBFOX2,KHSRP,RBFOX1,A2BP1	Gain	1	530	0.00188679245283019
11	62433664	T>G	AHNAK	UTR3	UCEC	TGCATGT	-	RBFOX1	Gain	1	530	0.00188679245283019
11	62433664	T>G	AHNAK	UTR3	UCEC	TTCTTT	-	PTBP1	Loss	1	530	0.00188679245283019
11	62433664	T>G	AHNAK	UTR3	UCEC	TTTCTTT	-	PTBP1,RALYL	Loss	1	530	0.00188679245283019
11	62433766	G>A	AHNAK	UTR3	UCEC	AATTAA	-	PPIE	Gain	1	530	0.00188679245283019
11	62433766	C>T	AHNAK	UTR3	UCEC	ACTGCA	+	HNRNPDL	Loss	1	530	0.00188679245283019
11	62433766	G>A	AHNAK	UTR3	UCEC	ATTAAA	-	PPIE	Gain	1	530	0.00188679245283019
11	62433766	G>A	AHNAK	UTR3	UCEC	CAATTAAA	-	PCBP1,PCBP2	Gain	1	530	0.00188679245283019
11	62433766	C>T	AHNAK	UTR3	UCEC	TTAATT	+	PPIE	Gain	1	530	0.00188679245283019
11	62433766	C>T	AHNAK	UTR3	UCEC	TTAATTG	+	SFPQ,A1CF	Gain	1	530	0.00188679245283019
11	62433766	C>T	AHNAK	UTR3	UCEC	TTTAAT	+	PPIE	Gain	1	530	0.00188679245283019
11	62433766	C>T	AHNAK	UTR3	UCEC	TTTAATT	+	RBM15B	Gain	1	530	0.00188679245283019
11	62433836	G>C	AHNAK	UTR3	UCEC	ACCGTC	+	SRSF6	Gain	1	530	0.00188679245283019
11	62433836	C>G	AHNAK	UTR3	UCEC	CGTTCTT	-	ZNF638	Loss	1	530	0.00188679245283019
11	62433836	C>G	AHNAK	UTR3	UCEC	GGTTCTT	-	ZNF638	Gain	1	530	0.00188679245283019
11	62515956	G>T	AHNAK	UTR3	UCEC	GAATGT	-	TARDBP	Loss	1	530	0.00188679245283019
11	62516131	C>A	AHNAK	UTR3	UCEC	TATGTT	-	CELF2	Gain	1	530	0.00188679245283019
11	62516420	A>C	AHNAK	UTR3	UCEC	AAAAAT	+	PPIE	Loss	1	530	0.00188679245283019
11	62516420	T>G	AHNAK	UTR3	UCEC	ATTTTT	-	PPIE	Loss	1	530	0.00188679245283019
11	62516420	T>G	AHNAK	UTR3	UCEC	ATTTTTA	-	ELAVL2,TIAL1,TRNAU1AP	Loss	1	530	0.00188679245283019
11	62516420	T>G	AHNAK	UTR3	UCEC	CATTTTT	-	CPEB2,HNRNPC,RALYL	Loss	1	530	0.00188679245283019
11	62516420	T>G	AHNAK	UTR3	UCEC	GTTTTA	-	TIA1	Gain	1	530	0.00188679245283019
11	62516420	A>C	AHNAK	UTR3	UCEC	TAAAAA	+	PPIE	Loss	1	530	0.00188679245283019
11	62516420	T>G	AHNAK	UTR3	UCEC	TTTTTA	-	PPIE,HNRNPC	Loss	1	530	0.00188679245283019
11	62516481	A>C	AHNAK	UTR3	UCEC	AAAAAA	+	PPIE	Loss	1	530	0.00188679245283019
11	62516481	A>C	AHNAK	UTR3	UCEC	AAAAAAA	+	ELAVL4,PCBP1,SYNCRIP,HNRNPU,FMR1,RBM5,IGHMBP2,PABPC4,FUS,HNRNPD,SART3,HNRNPK,PABPC1,DAZAP1,HNRNPA1,LmjF354130,PABPC4,PABPC4	Loss	1	530	0.00188679245283019
11	62516481	A>C	AHNAK	UTR3	UCEC	AAAAAT	+	PPIE	Loss	1	530	0.00188679245283019
11	62516481	A>C	AHNAK	UTR3	UCEC	AAAAATA	+	NUPL2,PABPN1L	Loss	1	530	0.00188679245283019
11	62516481	A>C	AHNAK	UTR3	UCEC	AAAATA	+	PPIE	Loss	1	530	0.00188679245283019
11	62516481	A>C	AHNAK	UTR3	UCEC	AAAATAT	+	PABPN1L	Loss	1	530	0.00188679245283019
11	62516481	A>C	AHNAK	UTR3	UCEC	AAACAAA	+	HNRNPL	Gain	1	530	0.00188679245283019
11	62516481	A>C	AHNAK	UTR3	UCEC	ACAAATA	+	PABPC1	Gain	1	530	0.00188679245283019
11	62516481	T>G	AHNAK	UTR3	UCEC	ATTTTT	-	PPIE	Loss	1	530	0.00188679245283019
11	62516481	T>G	AHNAK	UTR3	UCEC	ATTTTTT	-	HNRNPCL1,HNRNPC,TIA1,PTBP1,BOLL,HNRNPC,HNRNPCL1,Smp067420,HNRNPC,HNRNPCL1	Loss	1	530	0.00188679245283019
11	62516481	A>C	AHNAK	UTR3	UCEC	GCAAACA	+	IGF2BP2,HNRNPLL	Gain	1	530	0.00188679245283019
11	62516481	T>G	AHNAK	UTR3	UCEC	TATATTTT	-	KHSRP	Loss	1	530	0.00188679245283019
11	62516481	T>G	AHNAK	UTR3	UCEC	TATTTT	-	PPIE	Loss	1	530	0.00188679245283019
11	62516481	T>G	AHNAK	UTR3	UCEC	TATTTTT	-	TRNAU1AP	Loss	1	530	0.00188679245283019
11	62516481	T>G	AHNAK	UTR3	UCEC	TTTGTTT	-	ELAVL1,elav,ELAVL1,ELAVL1,ZC3H14CONSTRUCT,ZC3H14	Gain	1	530	0.00188679245283019
11	62516481	T>G	AHNAK	UTR3	UCEC	TTTTTG	-	HNRNPC	Loss	1	530	0.00188679245283019
11	62516481	T>G	AHNAK	UTR3	UCEC	TTTTTT	-	KHDRBS1,HNRNPC,DDX19B,EIF4A3,PPIE,CPEB4	Loss	1	530	0.00188679245283019
11	62516481	T>G	AHNAK	UTR3	UCEC	TTTTTTG	-	HNRNPCL1,HNRNPC,ELAVL1,TIA1,RALY,PFI1435w,RALY,TIA1,RALY,TIA1	Loss	1	530	0.00188679245283019
11	62516481	T>G	AHNAK	UTR3	UCEC	TTTTTTT	-	DAZAP1,TIA1,ELAVL1,ELAVL4,PCBP1,U2AF2,HNRNPCL1,HNRNPA1,HNRNPC,FUS,NOVA1,SFPQ,NOVA2,KHDRBS2,PCBP2,RALY,KHDRBS1,FMR1,ELAVL3,KHDRBS3,HNRNPU,DDX19B,HNRNPK,SYNCRIP,PTBP1,egw103003671,ELAVL1,gw184451,HNRNPC,HNRNPCL1,PUF60,Sxl,TVAG514790	Loss	1	530	0.00188679245283019
11	62516483	->AT	AHNAK	UTR3	UCEC	AAAAAAA	+	ELAVL4,PCBP1,SYNCRIP,HNRNPU,FMR1,RBM5,IGHMBP2,PABPC4,FUS,HNRNPD,SART3,HNRNPK,PABPC1,DAZAP1,HNRNPA1,LmjF354130,PABPC4,PABPC4	Loss	1	530	0.00188679245283019
11	62516483	->AT	AHNAK	UTR3	UCEC	AAAATAT	+	PABPN1L	Loss	1	530	0.00188679245283019
11	62516483	->AT	AHNAK	UTR3	UCEC	AAATAA	+	PPIE	Gain	1	530	0.00188679245283019
11	62516483	->AT	AHNAK	UTR3	UCEC	AAATAT	+	PPIE	Loss	1	530	0.00188679245283019
11	62516483	->AT	AHNAK	UTR3	UCEC	AATAAT	+	PPIE,KHDRBS3	Gain	1	530	0.00188679245283019
11	62516483	->AT	AHNAK	UTR3	UCEC	ATAATA	+	PPIE	Gain	1	530	0.00188679245283019
11	62516483	->AT	AHNAK	UTR3	UCEC	ATATTA	-	PPIE	Gain	1	530	0.00188679245283019
11	62516483	->AT	AHNAK	UTR3	UCEC	ATATTT	-	PPIE	Loss	1	530	0.00188679245283019
11	62516483	->AT	AHNAK	UTR3	UCEC	ATTATT	-	PPIE	Gain	1	530	0.00188679245283019
11	62516483	->AT	AHNAK	UTR3	UCEC	TAATAT	+	PPIE	Gain	1	530	0.00188679245283019
11	62516483	->AT	AHNAK	UTR3	UCEC	TATATTA	-	RC3H1,shep	Gain	1	530	0.00188679245283019
11	62516483	->AT	AHNAK	UTR3	UCEC	TATATTTT	-	KHSRP	Loss	1	530	0.00188679245283019
11	62516483	->AT	AHNAK	UTR3	UCEC	TATTAT	-	PPIE,KHSRP	Gain	1	530	0.00188679245283019
11	62516483	->AT	AHNAK	UTR3	UCEC	TATTATT	-	ELAVL4	Gain	1	530	0.00188679245283019
11	62516483	->AT	AHNAK	UTR3	UCEC	TATTATTTT	-	ELAVL2	Gain	1	530	0.00188679245283019
11	62516483	->AT	AHNAK	UTR3	UCEC	TTATTT	-	PPIE	Gain	1	530	0.00188679245283019
11	62516483	->AT	AHNAK	UTR3	UCEC	TTATTTT	-	ELAVL1,BOLL,ELAVL1	Gain	1	530	0.00188679245283019
11	62516483	->AT	AHNAK	UTR3	UCEC	TTTTTTT	-	DAZAP1,TIA1,ELAVL1,ELAVL4,PCBP1,U2AF2,HNRNPCL1,HNRNPA1,HNRNPC,FUS,NOVA1,SFPQ,NOVA2,KHDRBS2,PCBP2,RALY,KHDRBS1,FMR1,ELAVL3,KHDRBS3,HNRNPU,DDX19B,HNRNPK,SYNCRIP,PTBP1,egw103003671,ELAVL1,gw184451,HNRNPC,HNRNPCL1,PUF60,Sxl,TVAG514790	Loss	1	530	0.00188679245283019
11	62516540	G>A	AHNAK	UTR3	UCEC	GACAAA	+	SRSF10	Gain	1	530	0.00188679245283019
11	62516540	G>A	AHNAK	UTR3	UCEC	GACGAAC	+	SRSF1	Loss	1	530	0.00188679245283019
11	62516540	G>A	AHNAK	UTR3	UCEC	GGACAA	+	SRSF1	Gain	1	530	0.00188679245283019
11	62516540	G>A	AHNAK	UTR3	UCEC	GGACAAA	+	FXR2	Gain	1	530	0.00188679245283019
11	62516540	G>A	AHNAK	UTR3	UCEC	GGACGAA	+	SRSF1,FXR2	Loss	1	530	0.00188679245283019
11	62516540	G>A	AHNAK	UTR3	UCEC	TGGACAA	+	SRSF7	Gain	1	530	0.00188679245283019
11	62516540	C>T	AHNAK	UTR3	UCEC	TGTCCAG	-	PUM1	Gain	1	530	0.00188679245283019
11	62516558	G>T	AHNAK	UTR3	UCEC	AGATAT	-	HNRNPA1,HNRNPD,HNRNPA2B1,DAZAP1,HNRNPA0,HNRNPDL	Gain	1	530	0.00188679245283019
11	62516558	G>T	AHNAK	UTR3	UCEC	AGGTAA	-	ZRANB2,RBM5,ZRANB2	Loss	1	530	0.00188679245283019
11	62516558	C>A	AHNAK	UTR3	UCEC	TACATA	+	SRSF5	Gain	1	530	0.00188679245283019
11	62516558	G>T	AHNAK	UTR3	UCEC	TAGGTA	-	KHSRP,HNRNPA1	Loss	1	530	0.00188679245283019
11	62516558	G>T	AHNAK	UTR3	UCEC	TAGGTAA	-	DAZAP1	Loss	1	530	0.00188679245283019
11	62516606	A>G	AHNAK	UTR3	UCEC	CGAGCGC	-	ZC3H10	Gain	1	530	0.00188679245283019
11	62516606	T>C	AHNAK	UTR3	UCEC	CGCCACC	+	SRSF5	Gain	1	530	0.00188679245283019
11	62516606	A>G	AHNAK	UTR3	UCEC	GCGAGCG	-	SRSF1	Gain	1	530	0.00188679245283019
11	62516606	T>C	AHNAK	UTR3	UCEC	GCGCTC	+	MBNL1	Gain	1	530	0.00188679245283019
11	62516606	T>C	AHNAK	UTR3	UCEC	GCGCTT	+	MBNL1	Loss	1	530	0.00188679245283019
11	62516606	T>C	AHNAK	UTR3	UCEC	GCTTGC	+	MBNL1	Loss	1	530	0.00188679245283019
11	62516606	A>G	AHNAK	UTR3	UCEC	GGTGGCG	-	FUS	Gain	1	530	0.00188679245283019
11	62516606	T>C	AHNAK	UTR3	UCEC	TTGCCA	+	MBNL1	Loss	1	530	0.00188679245283019
11	62516641	T>C	AHNAK	UTR3	UCEC	CGAGGCA	+	SRSF1	Gain	1	530	0.00188679245283019
11	62516641	T>C	AHNAK	UTR3	UCEC	TTGCCG	+	MBNL1	Gain	1	530	0.00188679245283019
11	62516641	T>C	AHNAK	UTR3	UCEC	TTGCTG	+	MBNL1	Loss	1	530	0.00188679245283019
11	62516696	G>A	AHNAK	UTR3	UCEC	ATCAAC	-	NOVA1,NOVA2	Gain	1	530	0.00188679245283019
11	62516696	G>A	AHNAK	UTR3	UCEC	CATCAAC	-	SRSF3	Gain	1	530	0.00188679245283019
11	62516696	C>T	AHNAK	UTR3	UCEC	GGCTGATG	+	SRSF2	Loss	1	530	0.00188679245283019
11	62516696	C>T	AHNAK	UTR3	UCEC	TTGATGT	+	SFPQ	Gain	1	530	0.00188679245283019
11	62516703	A>G	AHNAK	UTR3	UCEC	AACATC	-	YBX1,ybx2-a,ybx2-a	Loss	1	530	0.00188679245283019
11	62516703	A>G	AHNAK	UTR3	UCEC	AACATCA	-	YBX1,YBX2,YB1,YB1,YBX1	Loss	1	530	0.00188679245283019
11	62516703	A>G	AHNAK	UTR3	UCEC	ACAAGAC	-	RBMY1A1	Gain	1	530	0.00188679245283019
11	62516703	A>G	AHNAK	UTR3	UCEC	CAAAACA	-	IGF2BP2	Loss	1	530	0.00188679245283019
11	62516703	T>C	AHNAK	UTR3	UCEC	GTCTTGT	+	CELF1	Gain	1	530	0.00188679245283019
11	62516703	T>C	AHNAK	UTR3	UCEC	GTTTTG	+	TIA1	Loss	1	530	0.00188679245283019
11	62516703	T>C	AHNAK	UTR3	UCEC	TCTTGT	+	ZFP36	Gain	1	530	0.00188679245283019
11	62516710	A>G	AHNAK	UTR3	UCEC	ATATAA	-	PPIE	Loss	1	530	0.00188679245283019
11	62516710	T>C	AHNAK	UTR3	UCEC	ATATAT	+	PPIE	Loss	1	530	0.00188679245283019
11	62516710	A>G	AHNAK	UTR3	UCEC	ATATAT	-	PPIE	Loss	1	530	0.00188679245283019
11	62516710	T>C	AHNAK	UTR3	UCEC	ATATATA	+	RBMS3,CNOT4,HNRNPD,RBMS3	Loss	1	530	0.00188679245283019
11	62516710	A>G	AHNAK	UTR3	UCEC	ATATATA	-	RBMS3,CNOT4,HNRNPD,RBMS3	Loss	1	530	0.00188679245283019
11	62516710	T>C	AHNAK	UTR3	UCEC	ATATATAT	+	AKAP1	Loss	1	530	0.00188679245283019
11	62516710	A>G	AHNAK	UTR3	UCEC	ATATATAT	-	AKAP1	Loss	1	530	0.00188679245283019
11	62516710	T>C	AHNAK	UTR3	UCEC	CATATA	+	RBMS3	Gain	1	530	0.00188679245283019
11	62516710	T>C	AHNAK	UTR3	UCEC	TACATA	+	SRSF5	Gain	1	530	0.00188679245283019
11	62516710	T>C	AHNAK	UTR3	UCEC	TATATA	+	RBMS3,PPIE	Loss	1	530	0.00188679245283019
11	62516710	A>G	AHNAK	UTR3	UCEC	TATATA	-	RBMS3,PPIE	Loss	1	530	0.00188679245283019
11	62516710	T>C	AHNAK	UTR3	UCEC	TATATAT	+	FUBP3	Loss	1	530	0.00188679245283019
11	62516710	A>G	AHNAK	UTR3	UCEC	TATATAT	-	FUBP3	Loss	1	530	0.00188679245283019
11	62516710	T>C	AHNAK	UTR3	UCEC	TTATAT	+	PPIE	Loss	1	530	0.00188679245283019
11	62516722	TG>-	AHNAK	UTR3	UCEC	ATATATA	+	RBMS3,CNOT4,HNRNPD,RBMS3	Gain	1	530	0.00188679245283019
11	62516722	CA>-	AHNAK	UTR3	UCEC	CATATA	-	RBMS3	Loss	1	530	0.00188679245283019
11	62516722	CA>-	AHNAK	UTR3	UCEC	GTGTATAT	-	KHSRP	Gain	1	530	0.00188679245283019
11	62516722	CA>-	AHNAK	UTR3	UCEC	GTGTGTAT	-	KHSRP	Gain	1	530	0.00188679245283019
11	62516722	CA>-	AHNAK	UTR3	UCEC	TACATA	-	SRSF5	Loss	1	530	0.00188679245283019
11	62516722	TG>-	AHNAK	UTR3	UCEC	TATATA	+	RBMS3,PPIE	Gain	1	530	0.00188679245283019
11	62516722	CA>-	AHNAK	UTR3	UCEC	TATATA	-	RBMS3,PPIE	Gain	1	530	0.00188679245283019
11	62516722	TG>-	AHNAK	UTR3	UCEC	TATATAC	+	RBMS1	Gain	1	530	0.00188679245283019
11	62516722	CA>-	AHNAK	UTR3	UCEC	TATATAT	-	FUBP3	Gain	1	530	0.00188679245283019
11	62516722	CA>-	AHNAK	UTR3	UCEC	TGTACAT	-	PUM1	Loss	1	530	0.00188679245283019
11	62516722	CA>-	AHNAK	UTR3	UCEC	TGTACATA	-	PUM1,PUM2	Loss	1	530	0.00188679245283019
11	62516722	CA>-	AHNAK	UTR3	UCEC	TGTATAT	-	PUM1	Gain	1	530	0.00188679245283019
11	62516722	CA>-	AHNAK	UTR3	UCEC	TGTATATA	-	PUM2,PUM1,PUM2	Gain	1	530	0.00188679245283019
11	62516729	A>G	AHNAK	UTR3	UCEC	ACACACA	+	HNRNPLL,HNRNPL,IGF2BP3,IGF2BP2,CNOT4,HNRNPL,hnRNPLL,sm,HNRNPL,HNRPLL	Loss	1	530	0.00188679245283019
11	62516729	A>G	AHNAK	UTR3	UCEC	ACACATA	+	Cnot4	Loss	1	530	0.00188679245283019
11	62516729	A>G	AHNAK	UTR3	UCEC	ACATACA	+	IGF2BP3,HNRNPLL,HNRNPL,IGF2BP2,HNRNPL	Loss	1	530	0.00188679245283019
11	62516729	T>C	AHNAK	UTR3	UCEC	ATGTGT	-	CELF2	Loss	1	530	0.00188679245283019
11	62516729	T>C	AHNAK	UTR3	UCEC	ATGTGTGT	-	KHSRP	Loss	1	530	0.00188679245283019
11	62516729	A>G	AHNAK	UTR3	UCEC	CACATA	+	SRSF5	Loss	1	530	0.00188679245283019
11	62516729	A>G	AHNAK	UTR3	UCEC	CGCATA	+	SRSF5	Gain	1	530	0.00188679245283019
11	62516729	A>G	AHNAK	UTR3	UCEC	GCATAC	+	YTHDC1,SRSF1*,HNRNPC*	Gain	1	530	0.00188679245283019
11	62516729	A>G	AHNAK	UTR3	UCEC	GCATACA	+	IGF2BP2,HNRNPLL	Gain	1	530	0.00188679245283019
11	62516729	T>C	AHNAK	UTR3	UCEC	GTATGT	-	CELF2	Loss	1	530	0.00188679245283019
11	62516729	T>C	AHNAK	UTR3	UCEC	GTGTGT	-	CELF2	Loss	1	530	0.00188679245283019
11	62516729	T>C	AHNAK	UTR3	UCEC	TATGTG	-	CELF2	Loss	1	530	0.00188679245283019
11	62516729	T>C	AHNAK	UTR3	UCEC	TGCGTG	-	SRSF6	Gain	1	530	0.00188679245283019
11	62516729	T>C	AHNAK	UTR3	UCEC	TGTGTG	-	CELF1,TARDBP,CELF2	Loss	1	530	0.00188679245283019
11	62516729	T>C	AHNAK	UTR3	UCEC	TGTGTGT	-	RBM24,CELF5,CELF1,CELF4,aret,aretCONSTRUCT,BRUNOL4,BRUNOL5,papi,BRUNOL4,BRUNOL5	Loss	1	530	0.00188679245283019
11	62516729	T>C	AHNAK	UTR3	UCEC	TTGTATGT	-	KHSRP	Loss	1	530	0.00188679245283019
11	62516739	G>A	AHNAK	UTR3	UCEC	ACCTGC	+	ZFP36	Gain	1	530	0.00188679245283019
11	62516739	C>T	AHNAK	UTR3	UCEC	AGGTCT	-	ZRANB2	Gain	1	530	0.00188679245283019
11	62516739	G>A	AHNAK	UTR3	UCEC	GCCTGC	+	YTHDC1	Loss	1	530	0.00188679245283019
11	62516739	C>T	AHNAK	UTR3	UCEC	GTCTTT	-	PTBP1	Gain	1	530	0.00188679245283019
11	62535943	A>T	AHNAK	splicing	UCEC	CACCCTCC	+	KHSRP	Loss	1	530	0.00188679245283019
11	62535943	A>T	AHNAK	splicing	UCEC	CTCCCTCC	+	KHSRP	Gain	1	530	0.00188679245283019
11	62535943	T>A	AHNAK	splicing	UCEC	GAGGGAG	-	RBM5	Gain	1	530	0.00188679245283019
11	62535943	T>A	AHNAK	splicing	UCEC	GAGGGTG	-	RBM5	Loss	1	530	0.00188679245283019
11	62535943	T>A	AHNAK	splicing	UCEC	GGAGAG	-	SRSF2	Gain	1	530	0.00188679245283019
11	62535943	T>A	AHNAK	splicing	UCEC	GGAGGGA	-	SRSF1	Gain	1	530	0.00188679245283019
11	62535943	T>A	AHNAK	splicing	UCEC	GGGTGA	-	ZRANB2,FUS	Loss	1	530	0.00188679245283019
12	100942537	A>G	ANO4	splicing	UCEC	ACCTCT	-	ZFP36	Loss	1	530	0.00188679245283019
12	100942537	T>C	ANO4	splicing	UCEC	AGAGGTA	+	SFPQ	Loss	1	530	0.00188679245283019
12	100942537	T>C	ANO4	splicing	UCEC	AGGTAA	+	ZRANB2,RBM5,ZRANB2	Loss	1	530	0.00188679245283019
12	100942537	A>G	ANO4	splicing	UCEC	ATTTAC	-	KHDRBS1	Loss	1	530	0.00188679245283019
12	100942537	A>G	ANO4	splicing	UCEC	CTATTTA	-	RBMS2	Loss	1	530	0.00188679245283019
12	100942537	T>C	ANO4	splicing	UCEC	TAAATA	+	PPIE	Loss	1	530	0.00188679245283019
12	100942537	A>G	ANO4	splicing	UCEC	TATTTA	-	PPIE,KHSRP	Loss	1	530	0.00188679245283019
12	100942537	A>G	ANO4	splicing	UCEC	TTGCCT	-	MBNL1	Gain	1	530	0.00188679245283019
12	100974816	G>A	ANO4	intronic	UCEC	CTTCTCG	+	SRSF6	Loss	2	530	0.00377358490566038
12	101042333	C>T	ANO4	splicing	UCEC	CCGCTT	-	MBNL1	Gain	1	530	0.00188679245283019
12	101127884	G>T	ANO4	UTR3	UCEC	AAGGACC	+	SFPQ	Loss	1	530	0.00188679245283019
12	101127884	G>T	ANO4	UTR3	UCEC	AGGACC	+	SRSF1	Loss	1	530	0.00188679245283019
12	101127884	G>T	ANO4	UTR3	UCEC	CCAAGGA	+	SRSF1	Loss	1	530	0.00188679245283019
12	101127927	C>T	ANO4	UTR3	UCEC	ACACTCA	+	IGF2BP2,IGF2BP3	Loss	1	530	0.00188679245283019
12	101127927	C>T	ANO4	UTR3	UCEC	ACATTCA	+	IGF2BP3,IGF2BP2	Gain	1	530	0.00188679245283019
12	101127927	C>T	ANO4	UTR3	UCEC	ATTCAAG	+	SNRNP70	Gain	1	530	0.00188679245283019
12	101127927	G>A	ANO4	UTR3	UCEC	GAATGT	-	TARDBP	Gain	1	530	0.00188679245283019
12	101127927	G>A	ANO4	UTR3	UCEC	TGAGTGT	-	RBM24	Loss	1	530	0.00188679245283019
12	101128083	G>T	ANO4	UTR3	UCEC	AATAAT	-	PPIE,KHDRBS3	Gain	2	530	0.00377358490566038
12	101128083	C>A	ANO4	UTR3	UCEC	ATTATT	+	PPIE	Gain	2	530	0.00377358490566038
12	101128083	C>A	ANO4	UTR3	UCEC	CCATTC	+	PCBP2	Loss	2	530	0.00377358490566038
12	101128083	G>T	ANO4	UTR3	UCEC	GAATGG	-	TARDBP	Loss	2	530	0.00377358490566038
12	101128083	C>A	ANO4	UTR3	UCEC	TTCTTG	+	PTBP1	Loss	2	530	0.00377358490566038
12	101128110	G>A	ANO4	UTR3	UCEC	AGCAGTT	+	SRSF4	Gain	1	530	0.00188679245283019
12	101128110	G>A	ANO4	UTR3	UCEC	ATGAGCA	+	SRSF9	Gain	1	530	0.00188679245283019
12	101128110	C>T	ANO4	UTR3	UCEC	CTGCCC	-	MBNL1	Loss	1	530	0.00188679245283019
12	101128110	C>T	ANO4	UTR3	UCEC	CTGCTC	-	MBNL1	Gain	1	530	0.00188679245283019
12	101128128	T>-	ANO4	UTR3	UCEC	GTTTTA	+	TIA1	Gain	1	530	0.00188679245283019
12	101128128	T>-	ANO4	UTR3	UCEC	GTTTTTA	+	ELAVL2	Loss	1	530	0.00188679245283019
12	101128128	A>-	ANO4	UTR3	UCEC	TAAAAA	-	PPIE	Loss	1	530	0.00188679245283019
12	101128128	T>-	ANO4	UTR3	UCEC	TTTTTA	+	PPIE,HNRNPC	Loss	1	530	0.00188679245283019
12	101128196	G>T	ANO4	UTR3	UCEC	ATAGAA	-	HNRNPA1	Loss	1	530	0.00188679245283019
12	101128196	G>T	ANO4	UTR3	UCEC	ATATAA	-	PPIE	Gain	1	530	0.00188679245283019
12	101128196	C>A	ANO4	UTR3	UCEC	ATTATA	+	PPIE	Gain	1	530	0.00188679245283019
12	101128196	G>T	ANO4	UTR3	UCEC	GAATGC	-	YTHDC1,2_YTHDC1	Loss	1	530	0.00188679245283019
12	101128196	G>T	ANO4	UTR3	UCEC	GGATAT	-	SRSF1*,HNRNPC*	Gain	1	530	0.00188679245283019
12	101128196	G>T	ANO4	UTR3	UCEC	TAATGC	-	YTHDC1	Gain	1	530	0.00188679245283019
12	101128196	G>T	ANO4	UTR3	UCEC	TATAAT	-	PPIE	Gain	1	530	0.00188679245283019
12	101128196	C>A	ANO4	UTR3	UCEC	TTATAT	+	PPIE	Gain	1	530	0.00188679245283019
12	101128228	T>-	ANO4	UTR3	UCEC	CCTTTTT	-	CPEB2,PTBP1	Loss	1	530	0.00188679245283019
12	101128228	T>-	ANO4	UTR3	UCEC	CTTTTA	-	ELAVL2,TIAL1,TIA1	Gain	1	530	0.00188679245283019
12	101128228	T>-	ANO4	UTR3	UCEC	CTTTTT	-	ELAVL2	Loss	1	530	0.00188679245283019
12	101128228	T>-	ANO4	UTR3	UCEC	CTTTTTA	-	TIAL1,TIA1,ELAVL2,HNRNPCL1	Loss	1	530	0.00188679245283019
12	101128228	A>-	ANO4	UTR3	UCEC	TAAAAA	+	PPIE	Loss	1	530	0.00188679245283019
12	101128228	A>-	ANO4	UTR3	UCEC	TAAAAGG	+	Khdrbs1	Gain	1	530	0.00188679245283019
12	101128228	T>-	ANO4	UTR3	UCEC	TTTTTA	-	PPIE,HNRNPC	Loss	1	530	0.00188679245283019
12	101128233	G>A	ANO4	UTR3	UCEC	AAAAAA	+	PPIE	Gain	1	530	0.00188679245283019
12	101128233	G>A	ANO4	UTR3	UCEC	AAAAAAG	+	PABPC4,ENSXETG00000007102,NAB2CONSTRUCT	Gain	1	530	0.00188679245283019
12	101128233	C>T	ANO4	UTR3	UCEC	ACCCTT	-	HNRNPK	Loss	1	530	0.00188679245283019
12	101128233	C>T	ANO4	UTR3	UCEC	ACCTTT	-	ZFP36	Gain	1	530	0.00188679245283019
12	101128233	G>A	ANO4	UTR3	UCEC	AGGGTAT	+	SRSF2	Loss	1	530	0.00188679245283019
12	101128233	G>A	ANO4	UTR3	UCEC	AGGTAT	+	ZRANB2	Gain	1	530	0.00188679245283019
12	101128233	C>T	ANO4	UTR3	UCEC	CCCTTT	-	ZFP36	Loss	1	530	0.00188679245283019
12	101128233	C>T	ANO4	UTR3	UCEC	CTTTTTA	-	TIAL1,TIA1,ELAVL2,HNRNPCL1	Loss	1	530	0.00188679245283019
12	101128233	C>T	ANO4	UTR3	UCEC	CTTTTTT	-	HNRNPC,HNRNPCL1,CPEB2,PTBP1,CPEB2,CPEB4,tiar1,tiar3,CPEB2,CPEB4	Gain	1	530	0.00188679245283019
12	101128233	C>T	ANO4	UTR3	UCEC	TTTTTT	-	KHDRBS1,HNRNPC,DDX19B,EIF4A3,PPIE,CPEB4	Gain	1	530	0.00188679245283019
12	101128233	C>T	ANO4	UTR3	UCEC	TTTTTTA	-	CPEB1	Gain	1	530	0.00188679245283019
12	101128285	T>C	ANO4	UTR3	UCEC	ACTAGGA	-	HNRNPDL	Gain	1	530	0.00188679245283019
12	101128285	T>C	ANO4	UTR3	UCEC	GAATTA	-	TRA2B*	Loss	1	530	0.00188679245283019
12	101128285	T>C	ANO4	UTR3	UCEC	TTAGGA	-	HNRNPD,PCBP2,PCBP1	Loss	1	530	0.00188679245283019
12	101128288	G>A	ANO4	UTR3	UCEC	AAATTA	-	PPIE	Gain	1	530	0.00188679245283019
12	101128288	G>A	ANO4	UTR3	UCEC	GAATTA	-	TRA2B*	Loss	1	530	0.00188679245283019
12	101128288	C>T	ANO4	UTR3	UCEC	TAATTT	+	PPIE	Gain	1	530	0.00188679245283019
12	101128332	G>T	ANO4	UTR3	UCEC	AAAAAGGAAAG	-	ZFP36	Loss	1	530	0.00188679245283019
12	101128332	G>T	ANO4	UTR3	UCEC	AAAGAAA	-	SRSF10	Loss	1	530	0.00188679245283019
12	101128332	G>T	ANO4	UTR3	UCEC	AAATAA	-	PPIE	Gain	1	530	0.00188679245283019
12	101128332	G>T	ANO4	UTR3	UCEC	AAATAAA	-	KHDRBS3,HNRNPL,KHDRBS3	Gain	1	530	0.00188679245283019
12	101128332	G>T	ANO4	UTR3	UCEC	AATAAA	-	PPIE	Gain	1	530	0.00188679245283019
12	101128332	G>T	ANO4	UTR3	UCEC	AATAAAA	-	KHDRBS2	Gain	1	530	0.00188679245283019
12	101128332	G>T	ANO4	UTR3	UCEC	AGAAAAA	-	PABPC1,SART3,PABPC1,SART3,Tbg97295210,TVAG002940	Loss	1	530	0.00188679245283019
12	101128332	G>T	ANO4	UTR3	UCEC	AGGAAAG	-	SRSF9	Loss	1	530	0.00188679245283019
12	101128332	G>T	ANO4	UTR3	UCEC	ATAAAA	-	KHDRBS3,PPIE,KHDRBS1	Gain	1	530	0.00188679245283019
12	101128332	G>T	ANO4	UTR3	UCEC	ATAAAAA	-	KHDRBS1	Gain	1	530	0.00188679245283019
12	101128332	C>A	ANO4	UTR3	UCEC	CTTTTTA	+	TIAL1,TIA1,ELAVL2,HNRNPCL1	Gain	1	530	0.00188679245283019
12	101128332	C>A	ANO4	UTR3	UCEC	CTTTTTC	+	TIAL1,TIA1	Loss	1	530	0.00188679245283019
12	101128332	G>T	ANO4	UTR3	UCEC	GAAAGAA	-	SRSF10	Loss	1	530	0.00188679245283019
12	101128332	G>T	ANO4	UTR3	UCEC	TAAAAA	-	PPIE	Gain	1	530	0.00188679245283019
12	101128332	C>A	ANO4	UTR3	UCEC	TCTTTC	+	ZFP36	Loss	1	530	0.00188679245283019
12	101128332	C>A	ANO4	UTR3	UCEC	TTATTT	+	PPIE	Gain	1	530	0.00188679245283019
12	101128332	C>A	ANO4	UTR3	UCEC	TTCTTT	+	PTBP1	Loss	1	530	0.00188679245283019
12	101128332	C>A	ANO4	UTR3	UCEC	TTTATT	+	PPIE	Gain	1	530	0.00188679245283019
12	101128332	C>A	ANO4	UTR3	UCEC	TTTATTT	+	ELAVL1,ELAVL4,FUBP1,RBM15B,TIA1	Gain	1	530	0.00188679245283019
12	101128332	C>A	ANO4	UTR3	UCEC	TTTCTTT	+	PTBP1,RALYL	Loss	1	530	0.00188679245283019
12	101128332	C>A	ANO4	UTR3	UCEC	TTTTAT	+	PPIE	Gain	1	530	0.00188679245283019
12	101128332	C>A	ANO4	UTR3	UCEC	TTTTATT	+	TIA1	Gain	1	530	0.00188679245283019
12	101128332	C>A	ANO4	UTR3	UCEC	TTTTTA	+	PPIE,HNRNPC	Gain	1	530	0.00188679245283019
12	101128332	C>A	ANO4	UTR3	UCEC	TTTTTC	+	HNRNPC	Loss	1	530	0.00188679245283019
12	101128332	C>A	ANO4	UTR3	UCEC	TTTTTCT	+	TIA1,PTBP1	Loss	1	530	0.00188679245283019
12	101128337	->A	ANO4	UTR3	UCEC	AAAAAGGAAAG	-	ZFP36	Loss	1	530	0.00188679245283019
12	101128337	->A	ANO4	UTR3	UCEC	AAAAGA	-	PABPN1	Gain	1	530	0.00188679245283019
12	101128337	->A	ANO4	UTR3	UCEC	AAAGAGA	-	SRSF10	Gain	1	530	0.00188679245283019
12	101128337	->A	ANO4	UTR3	UCEC	AAAGGAA	-	SRSF10,NUPL2	Loss	1	530	0.00188679245283019
12	101128337	->A	ANO4	UTR3	UCEC	AGAGAAA	-	SRSF10,Fusip1,Fusip1,Fusip1	Gain	1	530	0.00188679245283019
12	101128337	->A	ANO4	UTR3	UCEC	AGGAAAG	-	SRSF9	Loss	1	530	0.00188679245283019
12	101128337	->T	ANO4	UTR3	UCEC	CCTTTT	+	ZFP36	Loss	1	530	0.00188679245283019
12	101128337	->T	ANO4	UTR3	UCEC	CCTTTTT	+	CPEB2,PTBP1	Loss	1	530	0.00188679245283019
12	101128337	->T	ANO4	UTR3	UCEC	CTCTTT	+	PTBP1	Gain	1	530	0.00188679245283019
12	101128337	->T	ANO4	UTR3	UCEC	TCCTTT	+	ZFP36	Loss	1	530	0.00188679245283019
12	101128337	->T	ANO4	UTR3	UCEC	TCTTTCT	+	PTBP1,PTBP3	Gain	1	530	0.00188679245283019
12	101128337	->T	ANO4	UTR3	UCEC	TCTTTT	+	ZFP36	Gain	1	530	0.00188679245283019
12	101128337	->T	ANO4	UTR3	UCEC	TCTTTTT	+	PTBP1	Gain	1	530	0.00188679245283019
12	101128337	->T	ANO4	UTR3	UCEC	TTTCTCT	+	PUF60	Gain	1	530	0.00188679245283019
12	101128338	A>-	ANO4	UTR3	UCEC	AAAAAA	-	PPIE	Loss	1	530	0.00188679245283019
12	101128338	A>-	ANO4	UTR3	UCEC	AAAAAAA	-	ELAVL4,PCBP1,SYNCRIP,HNRNPU,FMR1,RBM5,IGHMBP2,PABPC4,FUS,HNRNPD,SART3,HNRNPK,PABPC1,DAZAP1,HNRNPA1,LmjF354130,PABPC4,PABPC4	Loss	1	530	0.00188679245283019
12	101128338	A>-	ANO4	UTR3	UCEC	AAAAAAAA	-	IGHMBP2,PABPC1	Loss	1	530	0.00188679245283019
12	101128338	T>-	ANO4	UTR3	UCEC	TTTTTT	+	KHDRBS1,HNRNPC,DDX19B,EIF4A3,PPIE,CPEB4	Loss	1	530	0.00188679245283019
12	101128338	T>-	ANO4	UTR3	UCEC	TTTTTTT	+	DAZAP1,TIA1,ELAVL1,ELAVL4,PCBP1,U2AF2,HNRNPCL1,HNRNPA1,HNRNPC,FUS,NOVA1,SFPQ,NOVA2,KHDRBS2,PCBP2,RALY,KHDRBS1,FMR1,ELAVL3,KHDRBS3,HNRNPU,DDX19B,HNRNPK,SYNCRIP,PTBP1,egw103003671,ELAVL1,gw184451,HNRNPC,HNRNPCL1,PUF60,Sxl,TVAG514790	Loss	1	530	0.00188679245283019
12	101128348	A>C	ANO4	UTR3	UCEC	AAAATT	-	PPIE	Loss	1	530	0.00188679245283019
12	101128348	A>C	ANO4	UTR3	UCEC	AAATTA	-	PPIE	Loss	1	530	0.00188679245283019
12	101128348	A>C	ANO4	UTR3	UCEC	AAATTAA	-	KHDRBS2	Loss	1	530	0.00188679245283019
12	101128348	A>C	ANO4	UTR3	UCEC	AATTAA	-	PPIE	Loss	1	530	0.00188679245283019
12	101128348	T>G	ANO4	UTR3	UCEC	AATTTT	+	PPIE	Loss	1	530	0.00188679245283019
12	101128348	A>C	ANO4	UTR3	UCEC	ATTAAA	-	PPIE	Loss	1	530	0.00188679245283019
12	101128348	T>G	ANO4	UTR3	UCEC	ATTTTA	+	PPIE,TIAL1,KHSRP	Loss	1	530	0.00188679245283019
12	101128348	A>C	ANO4	UTR3	UCEC	CTAAAA	-	KHDRBS1	Loss	1	530	0.00188679245283019
12	101128348	T>G	ANO4	UTR3	UCEC	GTTTAGA	+	HNRNPA1	Gain	1	530	0.00188679245283019
12	101128348	A>C	ANO4	UTR3	UCEC	TAAAAT	-	PPIE	Loss	1	530	0.00188679245283019
12	101128348	T>G	ANO4	UTR3	UCEC	TAATTT	+	PPIE	Loss	1	530	0.00188679245283019
12	101128348	T>G	ANO4	UTR3	UCEC	TTAAGTT	+	ELAVL4,exc7	Gain	1	530	0.00188679245283019
12	101128348	T>G	ANO4	UTR3	UCEC	TTAATT	+	PPIE	Loss	1	530	0.00188679245283019
12	101128348	T>G	ANO4	UTR3	UCEC	TTAATTT	+	SFPQ	Loss	1	530	0.00188679245283019
12	101128348	T>G	ANO4	UTR3	UCEC	TTTAAT	+	PPIE	Loss	1	530	0.00188679245283019
12	101128348	T>G	ANO4	UTR3	UCEC	TTTAATT	+	RBM15B	Loss	1	530	0.00188679245283019
12	101128348	T>G	ANO4	UTR3	UCEC	TTTAATTTT	+	ELAVL2	Loss	1	530	0.00188679245283019
12	101128348	T>G	ANO4	UTR3	UCEC	TTTTAAGTT	+	ELAVL2	Gain	1	530	0.00188679245283019
12	101128348	T>G	ANO4	UTR3	UCEC	TTTTAATTT	+	ELAVL2	Loss	1	530	0.00188679245283019
12	101128410	C>A	ANO4	UTR3	UCEC	ATACATA	-	RBMS3	Gain	1	530	0.00188679245283019
12	101128410	G>T	ANO4	UTR3	UCEC	ATATAT	+	PPIE	Gain	1	530	0.00188679245283019
12	101128410	C>A	ANO4	UTR3	UCEC	ATATAT	-	PPIE	Gain	1	530	0.00188679245283019
12	101128410	G>T	ANO4	UTR3	UCEC	CATATA	+	RBMS3	Gain	1	530	0.00188679245283019
12	101128410	C>A	ANO4	UTR3	UCEC	CATATA	-	RBMS3	Gain	1	530	0.00188679245283019
12	101128410	C>A	ANO4	UTR3	UCEC	TACATA	-	SRSF5	Gain	1	530	0.00188679245283019
12	101128410	C>A	ANO4	UTR3	UCEC	TACATC	-	SRSF5	Loss	1	530	0.00188679245283019
12	101128410	G>T	ANO4	UTR3	UCEC	TATGTAT	+	FUBP1	Gain	1	530	0.00188679245283019
12	101128419	G>T	ANO4	UTR3	UCEC	ACACATA	-	Cnot4	Gain	1	530	0.00188679245283019
12	101128419	G>T	ANO4	UTR3	UCEC	ACATAAA	-	HNRNPL	Gain	1	530	0.00188679245283019
12	101128419	G>T	ANO4	UTR3	UCEC	ATAAAT	-	PPIE	Gain	1	530	0.00188679245283019
12	101128419	C>A	ANO4	UTR3	UCEC	ATGTGT	+	CELF2	Gain	1	530	0.00188679245283019
12	101128419	C>A	ANO4	UTR3	UCEC	ATGTGTGT	+	KHSRP	Gain	1	530	0.00188679245283019
12	101128419	C>A	ANO4	UTR3	UCEC	ATTTAT	+	PPIE	Gain	1	530	0.00188679245283019
12	101128419	G>T	ANO4	UTR3	UCEC	CACAGA	-	SRSF5	Loss	1	530	0.00188679245283019
12	101128419	G>T	ANO4	UTR3	UCEC	CACATA	-	SRSF5	Gain	1	530	0.00188679245283019
12	101128419	C>A	ANO4	UTR3	UCEC	CTGTGTGT	+	KHSRP	Loss	1	530	0.00188679245283019
12	101128419	G>T	ANO4	UTR3	UCEC	TAAATA	-	PPIE	Gain	1	530	0.00188679245283019
12	101128419	C>A	ANO4	UTR3	UCEC	TATGTG	+	CELF2	Gain	1	530	0.00188679245283019
12	101128419	C>A	ANO4	UTR3	UCEC	TATTTA	+	PPIE,KHSRP	Gain	1	530	0.00188679245283019
12	101128419	C>A	ANO4	UTR3	UCEC	TATTTAT	+	ZFP36	Gain	1	530	0.00188679245283019
12	101128531	T>C	ANO4	UTR3	UCEC	ACCCAT	-	HNRNPK	Gain	1	530	0.00188679245283019
12	101128531	A>G	ANO4	UTR3	UCEC	GGGTGA	+	ZRANB2,FUS	Gain	1	530	0.00188679245283019
12	101128531	A>G	ANO4	UTR3	UCEC	TGAGTGA	+	RBM24	Loss	1	530	0.00188679245283019
12	101128546	T>G	ANO4	UTR3	UCEC	ATTTAA	+	KHDRBS1,HNRNPA1,HNRNPA2B1,PPIE	Loss	1	530	0.00188679245283019
12	101128546	A>C	ANO4	UTR3	UCEC	ATTTAA	-	KHDRBS1,HNRNPA1,HNRNPA2B1,PPIE	Loss	1	530	0.00188679245283019
12	101128546	A>C	ANO4	UTR3	UCEC	ATTTAC	-	KHDRBS1	Gain	1	530	0.00188679245283019
12	101128546	A>C	ANO4	UTR3	UCEC	TAAATGT	-	CELF1	Loss	1	530	0.00188679245283019
12	101128546	A>C	ANO4	UTR3	UCEC	TATTTAA	-	KHDRBS3,RBMS3	Loss	1	530	0.00188679245283019
12	101128546	T>G	ANO4	UTR3	UCEC	TGTAAAT	+	pum,pum	Gain	1	530	0.00188679245283019
12	101128546	T>G	ANO4	UTR3	UCEC	TGTAAATA	+	PUM2,PUM1	Gain	1	530	0.00188679245283019
12	101128546	T>G	ANO4	UTR3	UCEC	TTAAAT	+	KHDRBS1,PPIE	Loss	1	530	0.00188679245283019
12	101128546	A>C	ANO4	UTR3	UCEC	TTAAAT	-	KHDRBS1,PPIE	Loss	1	530	0.00188679245283019
12	101128546	A>C	ANO4	UTR3	UCEC	TTACATG	-	RBM41,PF130315	Gain	1	530	0.00188679245283019
12	101128546	T>G	ANO4	UTR3	UCEC	TTTAAA	+	PPIE	Loss	1	530	0.00188679245283019
12	101128546	A>C	ANO4	UTR3	UCEC	TTTAAA	-	PPIE	Loss	1	530	0.00188679245283019
12	101128595	G>A	ANO4	UTR3	UCEC	TGATAC	+	YTHDC1	Gain	1	530	0.00188679245283019
12	101128595	G>A	ANO4	UTR3	UCEC	TGATGC	+	YTHDC1	Loss	1	530	0.00188679245283019
12	101128595	G>A	ANO4	UTR3	UCEC	TGATGCA	+	SRSF1,SRSF9	Loss	1	530	0.00188679245283019
12	101128595	C>T	ANO4	UTR3	UCEC	TGCATC	-	SRSF5	Loss	1	530	0.00188679245283019
12	101128595	G>A	ANO4	UTR3	UCEC	TGTGATG	+	CELF6	Loss	1	530	0.00188679245283019
12	101128595	C>T	ANO4	UTR3	UCEC	TTTTATTGT	-	ELAVL2	Gain	1	530	0.00188679245283019
12	101128618	C>A	ANO4	UTR3	UCEC	AATTTA	+	HNRNPDL,DAZAP1,HNRNPA2B1,HNRNPD,HNRNPA1,HNRNPA0,PPIE	Gain	1	530	0.00188679245283019
12	101128618	G>T	ANO4	UTR3	UCEC	AGAAATT	-	PABPC5	Loss	1	530	0.00188679245283019
12	101128618	G>T	ANO4	UTR3	UCEC	ATAAAT	-	PPIE	Gain	1	530	0.00188679245283019
12	101128618	C>A	ANO4	UTR3	UCEC	ATGCACA	+	SNRPA,cpo,mec8,SNRPA	Gain	1	530	0.00188679245283019
12	101128618	C>A	ANO4	UTR3	UCEC	ATTTAT	+	PPIE	Gain	1	530	0.00188679245283019
12	101128618	G>T	ANO4	UTR3	UCEC	GAAATTT	-	CG17838	Loss	1	530	0.00188679245283019
12	101128618	G>T	ANO4	UTR3	UCEC	GCATAA	-	OAS1	Gain	1	530	0.00188679245283019
12	101128618	G>T	ANO4	UTR3	UCEC	TAAATT	-	PPIE	Gain	1	530	0.00188679245283019
12	101128618	G>T	ANO4	UTR3	UCEC	TGCAGA	-	SRSF5	Loss	1	530	0.00188679245283019
12	101128618	G>T	ANO4	UTR3	UCEC	TGCATA	-	SRSF5	Gain	1	530	0.00188679245283019
12	115958721	G>A	MED13L	UTR3	UCEC	CCAGCGC	+	ZC3H10	Loss	1	530	0.00188679245283019
12	115958721	C>T	MED13L	UTR3	UCEC	GCGCTG	-	MBNL1	Loss	1	530	0.00188679245283019
12	115958721	C>T	MED13L	UTR3	UCEC	GTGCTG	-	MBNL1	Gain	1	530	0.00188679245283019
12	115958721	C>T	MED13L	UTR3	UCEC	TAGTGC	-	YTHDC1	Gain	1	530	0.00188679245283019
12	115958769	G>T	MED13L	UTR3	UCEC	AAATAA	-	PPIE	Gain	1	530	0.00188679245283019
12	115958769	G>T	MED13L	UTR3	UCEC	AATAAT	-	PPIE,KHDRBS3	Gain	1	530	0.00188679245283019
12	115958769	G>T	MED13L	UTR3	UCEC	ATAATA	-	PPIE	Gain	1	530	0.00188679245283019
12	115958769	C>A	MED13L	UTR3	UCEC	ATTATT	+	PPIE	Gain	1	530	0.00188679245283019
12	115958769	G>T	MED13L	UTR3	UCEC	GAAAGAA	-	SRSF10	Loss	1	530	0.00188679245283019
12	115958769	G>T	MED13L	UTR3	UCEC	GAAAGAAT	-	TRA2B	Loss	1	530	0.00188679245283019
12	115958769	G>T	MED13L	UTR3	UCEC	GAATAC	-	YTHDC1,1_YTHDC1	Loss	1	530	0.00188679245283019
12	115958769	G>T	MED13L	UTR3	UCEC	GAATACA	-	IGF2BP2	Loss	1	530	0.00188679245283019
12	115958769	G>T	MED13L	UTR3	UCEC	TAATAC	-	YTHDC1	Gain	1	530	0.00188679245283019
12	115958769	C>A	MED13L	UTR3	UCEC	TATTAT	+	PPIE,KHSRP	Gain	1	530	0.00188679245283019
12	115958769	C>A	MED13L	UTR3	UCEC	TATTATT	+	ELAVL4	Gain	1	530	0.00188679245283019
12	115958769	C>A	MED13L	UTR3	UCEC	TCTTTC	+	ZFP36	Loss	1	530	0.00188679245283019
12	115958769	C>A	MED13L	UTR3	UCEC	TTATTT	+	PPIE	Gain	1	530	0.00188679245283019
12	115958769	C>A	MED13L	UTR3	UCEC	TTCTTT	+	PTBP1	Loss	1	530	0.00188679245283019
12	115958792	A>G	MED13L	UTR3	UCEC	AAAAGA	+	PABPN1	Loss	1	530	0.00188679245283019
12	115958792	A>G	MED13L	UTR3	UCEC	AAAAGAA	+	SRSF10	Loss	1	530	0.00188679245283019
12	115958792	A>G	MED13L	UTR3	UCEC	ATAAAA	+	KHDRBS3,PPIE,KHDRBS1	Loss	1	530	0.00188679245283019
12	115958792	A>G	MED13L	UTR3	UCEC	ATAAAAG	+	KHDRBS1	Loss	1	530	0.00188679245283019
12	115958792	A>G	MED13L	UTR3	UCEC	ATATAA	+	PPIE	Loss	1	530	0.00188679245283019
12	115958792	A>G	MED13L	UTR3	UCEC	ATATATA	+	RBMS3,CNOT4,HNRNPD,RBMS3	Loss	1	530	0.00188679245283019
12	115958792	A>G	MED13L	UTR3	UCEC	ATGAAAG	+	SRSF9	Gain	1	530	0.00188679245283019
12	115958792	T>C	MED13L	UTR3	UCEC	CATATA	-	RBMS3	Gain	1	530	0.00188679245283019
12	115958792	T>C	MED13L	UTR3	UCEC	CTTTTA	-	ELAVL2,TIAL1,TIA1	Loss	1	530	0.00188679245283019
12	115958792	A>G	MED13L	UTR3	UCEC	GAAAGAA	+	SRSF10	Gain	1	530	0.00188679245283019
12	115958792	A>G	MED13L	UTR3	UCEC	GAAAGAAG	+	TRA2B	Gain	1	530	0.00188679245283019
12	115958792	A>G	MED13L	UTR3	UCEC	TATAAA	+	PPIE	Loss	1	530	0.00188679245283019
12	115958792	A>G	MED13L	UTR3	UCEC	TATATA	+	RBMS3,PPIE	Loss	1	530	0.00188679245283019
12	115958792	T>C	MED13L	UTR3	UCEC	TATATA	-	RBMS3,PPIE	Loss	1	530	0.00188679245283019
12	115958792	T>C	MED13L	UTR3	UCEC	TATATAT	-	FUBP3	Loss	1	530	0.00188679245283019
12	115958792	T>C	MED13L	UTR3	UCEC	TCTTTC	-	ZFP36	Gain	1	530	0.00188679245283019
12	115958792	T>C	MED13L	UTR3	UCEC	TCTTTT	-	ZFP36	Loss	1	530	0.00188679245283019
12	115958792	T>C	MED13L	UTR3	UCEC	TTATAT	-	PPIE	Loss	1	530	0.00188679245283019
12	115958792	T>C	MED13L	UTR3	UCEC	TTCTTTT	-	PTBP1	Loss	1	530	0.00188679245283019
12	115958792	T>C	MED13L	UTR3	UCEC	TTTATA	-	PPIE,HNRNPA2B1,HNRNPA1	Loss	1	530	0.00188679245283019
12	115958792	T>C	MED13L	UTR3	UCEC	TTTTAT	-	PPIE	Loss	1	530	0.00188679245283019
12	115958888	C>A	MED13L	UTR3	UCEC	AGGTTA	+	ZRANB2	Gain	1	530	0.00188679245283019
12	115958888	G>T	MED13L	UTR3	UCEC	TTTCAGA	-	ERI1	Loss	1	530	0.00188679245283019
12	115958905	G>A	MED13L	UTR3	UCEC	ACAAACA	+	HNRNPLL,IGF2BP2,IGF2BP3,PABPC1,IGF2BP2,IGF2BP2,IGF2BP3,IGF2BP2,IGF2BP3	Gain	1	530	0.00188679245283019
12	115958905	G>A	MED13L	UTR3	UCEC	AGCATG	+	RBFOX1	Loss	1	530	0.00188679245283019
12	115958905	G>A	MED13L	UTR3	UCEC	AGCATGC	+	RBFOX1,eIF2alpha	Loss	1	530	0.00188679245283019
12	115958905	C>T	MED13L	UTR3	UCEC	AGCATGC	-	RBFOX1,eIF2alpha	Loss	1	530	0.00188679245283019
12	115958905	C>T	MED13L	UTR3	UCEC	ATGCTT	-	MBNL1	Loss	1	530	0.00188679245283019
12	115958905	G>A	MED13L	UTR3	UCEC	GCATGC	+	YTHDC1	Loss	1	530	0.00188679245283019
12	115958905	C>T	MED13L	UTR3	UCEC	GCATGC	-	YTHDC1	Loss	1	530	0.00188679245283019
12	115958905	C>T	MED13L	UTR3	UCEC	TGTTTGT	-	CELF1,CELF1,TVAG129710	Gain	1	530	0.00188679245283019
12	115958946	->A	MED13L	UTR3	UCEC	AAAAGA	-	PABPN1	Gain	1	530	0.00188679245283019
12	115958946	->A	MED13L	UTR3	UCEC	AAAGAGG	-	SRSF10	Gain	1	530	0.00188679245283019
12	115958946	->A	MED13L	UTR3	UCEC	AAAGGGG	-	SRSF10	Loss	1	530	0.00188679245283019
12	115958946	->A	MED13L	UTR3	UCEC	AAGGGGAA	-	HNRNPH2*,HNRNPF*,HNRNPH1*	Loss	1	530	0.00188679245283019
12	115958946	->A	MED13L	UTR3	UCEC	AGAGGGA	-	SRSF10	Gain	1	530	0.00188679245283019
12	115958946	->A	MED13L	UTR3	UCEC	AGGGAA	-	ZRANB2	Gain	1	530	0.00188679245283019
12	115958946	->A	MED13L	UTR3	UCEC	AGGGAAA	-	SRSF9	Gain	1	530	0.00188679245283019
12	115958946	->A	MED13L	UTR3	UCEC	AGGGGAA	-	RO3G00049	Loss	1	530	0.00188679245283019
12	115958946	->T	MED13L	UTR3	UCEC	CCCTCT	+	ZFP36	Gain	1	530	0.00188679245283019
12	115958946	->T	MED13L	UTR3	UCEC	CCCTTT	+	ZFP36	Loss	1	530	0.00188679245283019
12	115958946	->T	MED13L	UTR3	UCEC	CCTCTTT	+	PTBP1,RBM4	Gain	1	530	0.00188679245283019
12	115958946	->T	MED13L	UTR3	UCEC	CCTTTT	+	ZFP36	Loss	1	530	0.00188679245283019
12	115958946	->T	MED13L	UTR3	UCEC	CCTTTTT	+	CPEB2,PTBP1	Loss	1	530	0.00188679245283019
12	115958946	->T	MED13L	UTR3	UCEC	CTCTTT	+	PTBP1	Gain	1	530	0.00188679245283019
12	115958946	->A	MED13L	UTR3	UCEC	GAGGGAA	-	RBM5	Gain	1	530	0.00188679245283019
12	115958946	->T	MED13L	UTR3	UCEC	TCCCCTT	+	HNRNPK	Loss	1	530	0.00188679245283019
12	115958946	->T	MED13L	UTR3	UCEC	TCTTTT	+	ZFP36	Gain	1	530	0.00188679245283019
12	115958946	->T	MED13L	UTR3	UCEC	TCTTTTT	+	PTBP1	Gain	1	530	0.00188679245283019
12	115958947	A>-	MED13L	UTR3	UCEC	AAAAAA	-	PPIE	Loss	2	530	0.00377358490566038
12	115958947	A>-	MED13L	UTR3	UCEC	AAAAAAA	-	ELAVL4,PCBP1,SYNCRIP,HNRNPU,FMR1,RBM5,IGHMBP2,PABPC4,FUS,HNRNPD,SART3,HNRNPK,PABPC1,DAZAP1,HNRNPA1,LmjF354130,PABPC4,PABPC4	Loss	2	530	0.00377358490566038
12	115958947	T>-	MED13L	UTR3	UCEC	TTTTTT	+	KHDRBS1,HNRNPC,DDX19B,EIF4A3,PPIE,CPEB4	Loss	2	530	0.00377358490566038
12	115958947	T>-	MED13L	UTR3	UCEC	TTTTTTT	+	DAZAP1,TIA1,ELAVL1,ELAVL4,PCBP1,U2AF2,HNRNPCL1,HNRNPA1,HNRNPC,FUS,NOVA1,SFPQ,NOVA2,KHDRBS2,PCBP2,RALY,KHDRBS1,FMR1,ELAVL3,KHDRBS3,HNRNPU,DDX19B,HNRNPK,SYNCRIP,PTBP1,egw103003671,ELAVL1,gw184451,HNRNPC,HNRNPCL1,PUF60,Sxl,TVAG514790	Loss	2	530	0.00377358490566038
12	115959007	A>-	MED13L	UTR3	UCEC	AAAAAA	+	PPIE	Loss	1	530	0.00188679245283019
12	115959007	A>-	MED13L	UTR3	UCEC	AAAAAAA	+	ELAVL4,PCBP1,SYNCRIP,HNRNPU,FMR1,RBM5,IGHMBP2,PABPC4,FUS,HNRNPD,SART3,HNRNPK,PABPC1,DAZAP1,HNRNPA1,LmjF354130,PABPC4,PABPC4	Loss	1	530	0.00188679245283019
12	115959007	A>-	MED13L	UTR3	UCEC	AAAAAAAA	+	IGHMBP2,PABPC1	Loss	1	530	0.00188679245283019
12	115959007	A>-	MED13L	UTR3	UCEC	AAAAAAAAA	+	AGO2	Loss	1	530	0.00188679245283019
12	115959007	T>-	MED13L	UTR3	UCEC	TTTTTT	-	KHDRBS1,HNRNPC,DDX19B,EIF4A3,PPIE,CPEB4	Loss	1	530	0.00188679245283019
12	115959007	T>-	MED13L	UTR3	UCEC	TTTTTTT	-	DAZAP1,TIA1,ELAVL1,ELAVL4,PCBP1,U2AF2,HNRNPCL1,HNRNPA1,HNRNPC,FUS,NOVA1,SFPQ,NOVA2,KHDRBS2,PCBP2,RALY,KHDRBS1,FMR1,ELAVL3,KHDRBS3,HNRNPU,DDX19B,HNRNPK,SYNCRIP,PTBP1,egw103003671,ELAVL1,gw184451,HNRNPC,HNRNPCL1,PUF60,Sxl,TVAG514790	Loss	1	530	0.00188679245283019
12	115959007	T>-	MED13L	UTR3	UCEC	TTTTTTTTT	-	TIA1	Loss	1	530	0.00188679245283019
12	115959027	C>A	MED13L	UTR3	UCEC	ACTTAT	+	SF1,QKI	Gain	1	530	0.00188679245283019
12	115959027	C>A	MED13L	UTR3	UCEC	ACTTCT	+	ZFP36	Loss	1	530	0.00188679245283019
12	115959027	G>T	MED13L	UTR3	UCEC	TAAGTTA	-	DAZAP1	Gain	1	530	0.00188679245283019
12	115959077	A>C	MED13L	UTR3	UCEC	AAAAAA	+	PPIE	Loss	1	530	0.00188679245283019
12	115959077	A>C	MED13L	UTR3	UCEC	AAAAAAC	+	PABPC1,SART3	Loss	1	530	0.00188679245283019
12	115959077	T>G	MED13L	UTR3	UCEC	GTTTTTT	-	DAZ3	Loss	1	530	0.00188679245283019
12	115959077	A>C	MED13L	UTR3	UCEC	TAAAAA	+	PPIE	Loss	1	530	0.00188679245283019
12	115959077	T>G	MED13L	UTR3	UCEC	TTTTAC	-	KHDRBS1	Loss	1	530	0.00188679245283019
12	115959077	T>G	MED13L	UTR3	UCEC	TTTTTA	-	PPIE,HNRNPC	Loss	1	530	0.00188679245283019
12	115959077	T>G	MED13L	UTR3	UCEC	TTTTTT	-	KHDRBS1,HNRNPC,DDX19B,EIF4A3,PPIE,CPEB4	Loss	1	530	0.00188679245283019
12	115959077	T>G	MED13L	UTR3	UCEC	TTTTTTA	-	CPEB1	Loss	1	530	0.00188679245283019
12	115959123	C>A	MED13L	UTR3	UCEC	AGTATGT	-	TARDBP	Gain	1	530	0.00188679245283019
12	115959123	G>T	MED13L	UTR3	UCEC	ATACATA	+	RBMS3	Gain	1	530	0.00188679245283019
12	115959123	G>T	MED13L	UTR3	UCEC	ATACTTT	+	RBM41	Gain	1	530	0.00188679245283019
12	115959123	C>A	MED13L	UTR3	UCEC	ATGTATA	-	KHSRP	Gain	1	530	0.00188679245283019
12	115959123	C>A	MED13L	UTR3	UCEC	GTATGT	-	CELF2	Gain	1	530	0.00188679245283019
12	115959123	C>A	MED13L	UTR3	UCEC	GTCTGT	-	CELF2	Loss	1	530	0.00188679245283019
12	115959123	G>T	MED13L	UTR3	UCEC	TACAGA	+	SRSF5	Loss	1	530	0.00188679245283019
12	115959123	G>T	MED13L	UTR3	UCEC	TACATA	+	SRSF5	Gain	1	530	0.00188679245283019
12	115959123	G>T	MED13L	UTR3	UCEC	TATACAG	+	ENOX1	Loss	1	530	0.00188679245283019
12	115959123	C>A	MED13L	UTR3	UCEC	TATGTAT	-	FUBP1	Gain	1	530	0.00188679245283019
12	115959150	A>C	MED13L	UTR3	UCEC	AATACGA	+	RBM3	Gain	1	530	0.00188679245283019
12	115959150	T>G	MED13L	UTR3	UCEC	AATCTTA	-	MATR3	Loss	1	530	0.00188679245283019
12	115959150	A>C	MED13L	UTR3	UCEC	ATAATAA	+	qkr58E1	Loss	1	530	0.00188679245283019
12	115959150	T>G	MED13L	UTR3	UCEC	ATCGTA	-	SRSF6	Gain	1	530	0.00188679245283019
12	115959150	A>C	MED13L	UTR3	UCEC	TAATAA	+	PPIE	Loss	1	530	0.00188679245283019
12	115959150	A>C	MED13L	UTR3	UCEC	TAATAC	+	YTHDC1	Gain	1	530	0.00188679245283019
12	115959150	T>G	MED13L	UTR3	UCEC	TTATTA	-	PPIE	Loss	1	530	0.00188679245283019
12	115959150	T>G	MED13L	UTR3	UCEC	TTATTAT	-	FUBP1,FUBP3	Loss	1	530	0.00188679245283019
12	115959205	T>C	MED13L	UTR3	UCEC	AAATAT	+	PPIE	Loss	1	530	0.00188679245283019
12	115959205	A>G	MED13L	UTR3	UCEC	ATATTT	-	PPIE	Loss	1	530	0.00188679245283019
12	115959205	A>G	MED13L	UTR3	UCEC	ATATTTA	-	shep,sup26CONSTRUCT	Loss	1	530	0.00188679245283019
12	115959205	T>C	MED13L	UTR3	UCEC	TACGTC	+	SRSF6,SRSF5	Gain	1	530	0.00188679245283019
12	115959274	->A	MED13L	UTR3	UCEC	AAAAATA	-	NUPL2,PABPN1L	Gain	1	530	0.00188679245283019
12	115959274	->A	MED13L	UTR3	UCEC	AAAATA	-	PPIE	Gain	1	530	0.00188679245283019
12	115959274	->T	MED13L	UTR3	UCEC	CATTTTT	+	CPEB2,HNRNPC,RALYL	Loss	1	530	0.00188679245283019
12	115959274	->T	MED13L	UTR3	UCEC	CCATTTT	+	Rox8	Loss	1	530	0.00188679245283019
12	115959274	->T	MED13L	UTR3	UCEC	CTGCCA	+	MBNL1	Loss	1	530	0.00188679245283019
12	115959274	->T	MED13L	UTR3	UCEC	CTGCCT	+	MBNL1	Gain	1	530	0.00188679245283019
12	115959274	->A	MED13L	UTR3	UCEC	TAGGCA	-	HNRNPA1	Gain	1	530	0.00188679245283019
12	115959274	->T	MED13L	UTR3	UCEC	TATTTT	+	PPIE	Gain	1	530	0.00188679245283019
12	115959274	->T	MED13L	UTR3	UCEC	TATTTTT	+	TRNAU1AP	Gain	1	530	0.00188679245283019
12	115959275	A>-	MED13L	UTR3	UCEC	AAAAAA	-	PPIE	Loss	1	530	0.00188679245283019
12	115959275	A>-	MED13L	UTR3	UCEC	AAAAAAA	-	ELAVL4,PCBP1,SYNCRIP,HNRNPU,FMR1,RBM5,IGHMBP2,PABPC4,FUS,HNRNPD,SART3,HNRNPK,PABPC1,DAZAP1,HNRNPA1,LmjF354130,PABPC4,PABPC4	Loss	1	530	0.00188679245283019
12	115959275	A>-	MED13L	UTR3	UCEC	AAAAAAAA	-	IGHMBP2,PABPC1	Loss	1	530	0.00188679245283019
12	115959275	T>-	MED13L	UTR3	UCEC	ATTTTTTTA	+	ELAVL2	Gain	1	530	0.00188679245283019
12	115959275	T>-	MED13L	UTR3	UCEC	TTTTTT	+	KHDRBS1,HNRNPC,DDX19B,EIF4A3,PPIE,CPEB4	Loss	1	530	0.00188679245283019
12	115959275	T>-	MED13L	UTR3	UCEC	TTTTTTT	+	DAZAP1,TIA1,ELAVL1,ELAVL4,PCBP1,U2AF2,HNRNPCL1,HNRNPA1,HNRNPC,FUS,NOVA1,SFPQ,NOVA2,KHDRBS2,PCBP2,RALY,KHDRBS1,FMR1,ELAVL3,KHDRBS3,HNRNPU,DDX19B,HNRNPK,SYNCRIP,PTBP1,egw103003671,ELAVL1,gw184451,HNRNPC,HNRNPCL1,PUF60,Sxl,TVAG514790	Loss	1	530	0.00188679245283019
12	115959283	T>-	MED13L	UTR3	UCEC	ACTTTAA	-	HNRNPDL	Loss	1	530	0.00188679245283019
12	115959283	A>-	MED13L	UTR3	UCEC	TTAAGTT	+	ELAVL4,exc7	Gain	1	530	0.00188679245283019
12	115959283	A>-	MED13L	UTR3	UCEC	TTTAAA	+	PPIE	Loss	1	530	0.00188679245283019
12	115959283	T>-	MED13L	UTR3	UCEC	TTTAAA	-	PPIE	Loss	1	530	0.00188679245283019
12	115959283	A>-	MED13L	UTR3	UCEC	TTTTAAGTT	+	ELAVL2	Gain	1	530	0.00188679245283019
12	115959287	A>-	MED13L	UTR3	UCEC	AAAAAA	-	PPIE	Loss	1	530	0.00188679245283019
12	115959287	A>-	MED13L	UTR3	UCEC	AAAAAAA	-	ELAVL4,PCBP1,SYNCRIP,HNRNPU,FMR1,RBM5,IGHMBP2,PABPC4,FUS,HNRNPD,SART3,HNRNPK,PABPC1,DAZAP1,HNRNPA1,LmjF354130,PABPC4,PABPC4	Loss	1	530	0.00188679245283019
12	115959287	T>-	MED13L	UTR3	UCEC	TTTTTT	+	KHDRBS1,HNRNPC,DDX19B,EIF4A3,PPIE,CPEB4	Loss	1	530	0.00188679245283019
12	115959287	T>-	MED13L	UTR3	UCEC	TTTTTTT	+	DAZAP1,TIA1,ELAVL1,ELAVL4,PCBP1,U2AF2,HNRNPCL1,HNRNPA1,HNRNPC,FUS,NOVA1,SFPQ,NOVA2,KHDRBS2,PCBP2,RALY,KHDRBS1,FMR1,ELAVL3,KHDRBS3,HNRNPU,DDX19B,HNRNPK,SYNCRIP,PTBP1,egw103003671,ELAVL1,gw184451,HNRNPC,HNRNPCL1,PUF60,Sxl,TVAG514790	Loss	1	530	0.00188679245283019
12	115959307	->A	MED13L	UTR3	UCEC	AAAAAA	-	PPIE	Gain	1	530	0.00188679245283019
12	115959307	->A	MED13L	UTR3	UCEC	AAAAAAA	-	ELAVL4,PCBP1,SYNCRIP,HNRNPU,FMR1,RBM5,IGHMBP2,PABPC4,FUS,HNRNPD,SART3,HNRNPK,PABPC1,DAZAP1,HNRNPA1,LmjF354130,PABPC4,PABPC4	Gain	1	530	0.00188679245283019
12	115959307	->T	MED13L	UTR3	UCEC	TTTTTT	+	KHDRBS1,HNRNPC,DDX19B,EIF4A3,PPIE,CPEB4	Gain	1	530	0.00188679245283019
12	115959307	->T	MED13L	UTR3	UCEC	TTTTTTT	+	DAZAP1,TIA1,ELAVL1,ELAVL4,PCBP1,U2AF2,HNRNPCL1,HNRNPA1,HNRNPC,FUS,NOVA1,SFPQ,NOVA2,KHDRBS2,PCBP2,RALY,KHDRBS1,FMR1,ELAVL3,KHDRBS3,HNRNPU,DDX19B,HNRNPK,SYNCRIP,PTBP1,egw103003671,ELAVL1,gw184451,HNRNPC,HNRNPCL1,PUF60,Sxl,TVAG514790	Gain	1	530	0.00188679245283019
12	115959316	->A	MED13L	UTR3	UCEC	AAACACA	-	IGF2BP2,IGF2BP3,HNRNPL	Loss	1	530	0.00188679245283019
12	115959316	->A	MED13L	UTR3	UCEC	AACAACA	-	YBX2	Gain	1	530	0.00188679245283019
12	115959316	->A	MED13L	UTR3	UCEC	ACACAAA	-	HNRNPL	Loss	1	530	0.00188679245283019
12	115959316	->T	MED13L	UTR3	UCEC	GTTGTT	+	CELF2	Gain	1	530	0.00188679245283019
12	115959316	->T	MED13L	UTR3	UCEC	TGTGTTT	+	CELF4,CELF5,FUBP1	Loss	1	530	0.00188679245283019
12	115959316	->T	MED13L	UTR3	UCEC	TGTTGT	+	CELF2	Gain	1	530	0.00188679245283019
12	115959316	->T	MED13L	UTR3	UCEC	TGTTGTT	+	ZNF638	Gain	1	530	0.00188679245283019
12	115959316	->T	MED13L	UTR3	UCEC	TTGTGT	+	CELF2	Loss	1	530	0.00188679245283019
12	115959316	->T	MED13L	UTR3	UCEC	TTGTTTT	+	ELAVL1	Gain	1	530	0.00188679245283019
12	115959316	->T	MED13L	UTR3	UCEC	TTTGTGT	+	etr1	Loss	1	530	0.00188679245283019
12	115959338	C>A	MED13L	UTR3	UCEC	AATTAT	-	PPIE	Gain	1	530	0.00188679245283019
12	115959338	G>T	MED13L	UTR3	UCEC	ATAATT	+	PPIE	Gain	1	530	0.00188679245283019
12	115959338	G>T	MED13L	UTR3	UCEC	ATAATTG	+	A1CF	Gain	1	530	0.00188679245283019
12	115959338	C>A	MED13L	UTR3	UCEC	ATTATA	-	PPIE	Gain	1	530	0.00188679245283019
12	115959338	G>T	MED13L	UTR3	UCEC	TATAAT	+	PPIE	Gain	1	530	0.00188679245283019
12	115959338	G>T	MED13L	UTR3	UCEC	TTATAA	+	PPIE	Gain	1	530	0.00188679245283019
12	115959338	C>A	MED13L	UTR3	UCEC	TTATAA	-	PPIE	Gain	1	530	0.00188679245283019
12	115959338	G>T	MED13L	UTR3	UCEC	TTATAAT	+	RBMS3	Gain	1	530	0.00188679245283019
12	115959388	A>-	MED13L	UTR3	UCEC	AAAAAA	+	PPIE	Loss	3	530	0.00566037735849057
12	115959388	A>-	MED13L	UTR3	UCEC	AAAAAAA	+	ELAVL4,PCBP1,SYNCRIP,HNRNPU,FMR1,RBM5,IGHMBP2,PABPC4,FUS,HNRNPD,SART3,HNRNPK,PABPC1,DAZAP1,HNRNPA1,LmjF354130,PABPC4,PABPC4	Loss	3	530	0.00566037735849057
12	115959388	A>-	MED13L	UTR3	UCEC	AAAAAAAA	+	IGHMBP2,PABPC1	Loss	3	530	0.00566037735849057
12	115959388	A>-	MED13L	UTR3	UCEC	AAAAAAAAA	+	AGO2	Loss	3	530	0.00566037735849057
12	115959388	T>-	MED13L	UTR3	UCEC	TTTTTT	-	KHDRBS1,HNRNPC,DDX19B,EIF4A3,PPIE,CPEB4	Loss	3	530	0.00566037735849057
12	115959388	T>-	MED13L	UTR3	UCEC	TTTTTTT	-	DAZAP1,TIA1,ELAVL1,ELAVL4,PCBP1,U2AF2,HNRNPCL1,HNRNPA1,HNRNPC,FUS,NOVA1,SFPQ,NOVA2,KHDRBS2,PCBP2,RALY,KHDRBS1,FMR1,ELAVL3,KHDRBS3,HNRNPU,DDX19B,HNRNPK,SYNCRIP,PTBP1,egw103003671,ELAVL1,gw184451,HNRNPC,HNRNPCL1,PUF60,Sxl,TVAG514790	Loss	3	530	0.00566037735849057
12	115959388	T>-	MED13L	UTR3	UCEC	TTTTTTTTT	-	TIA1	Loss	3	530	0.00566037735849057
12	115959457	T>A	MED13L	UTR3	UCEC	AAAAAT	+	PPIE	Gain	1	530	0.00188679245283019
12	115959457	T>A	MED13L	UTR3	UCEC	AAATAT	+	PPIE	Loss	1	530	0.00188679245283019
12	115959457	T>A	MED13L	UTR3	UCEC	ACAAATA	+	PABPC1	Loss	1	530	0.00188679245283019
12	115959457	A>T	MED13L	UTR3	UCEC	AGATAT	-	HNRNPA1,HNRNPD,HNRNPA2B1,DAZAP1,HNRNPA0,HNRNPDL	Loss	1	530	0.00188679245283019
12	115959457	A>T	MED13L	UTR3	UCEC	ATATTT	-	PPIE	Loss	1	530	0.00188679245283019
12	115959457	A>T	MED13L	UTR3	UCEC	ATTTTT	-	PPIE	Gain	1	530	0.00188679245283019
12	115959457	A>T	MED13L	UTR3	UCEC	ATTTTTG	-	TIA1,HNRNPC,HNRNPCL1	Gain	1	530	0.00188679245283019
12	115959457	A>T	MED13L	UTR3	UCEC	TAGATTT	-	MSI1	Gain	1	530	0.00188679245283019
12	115959457	A>T	MED13L	UTR3	UCEC	TTTTTG	-	HNRNPC	Gain	1	530	0.00188679245283019
12	115959457	A>T	MED13L	UTR3	UCEC	TTTTTGT	-	TIA1	Gain	1	530	0.00188679245283019
12	115959544	G>A	MED13L	UTR3	UCEC	AAAATT	+	PPIE	Gain	1	530	0.00188679245283019
12	115959544	G>A	MED13L	UTR3	UCEC	AAATTT	+	PPIE	Gain	1	530	0.00188679245283019
12	115959544	C>T	MED13L	UTR3	UCEC	AAATTT	-	PPIE	Gain	1	530	0.00188679245283019
12	115959544	C>T	MED13L	UTR3	UCEC	AATTTT	-	PPIE	Gain	1	530	0.00188679245283019
12	115959544	C>T	MED13L	UTR3	UCEC	ATTTTC	-	ELAVL2,TIA1,TIAL1	Gain	1	530	0.00188679245283019
12	115959564	->A	MED13L	UTR3	UCEC	AAAGAAA	+	SRSF10	Gain	1	530	0.00188679245283019
12	115959564	->A	MED13L	UTR3	UCEC	ATTAAA	+	PPIE	Gain	1	530	0.00188679245283019
12	115959564	->T	MED13L	UTR3	UCEC	TTCTTT	-	PTBP1	Gain	1	530	0.00188679245283019
12	115959564	->T	MED13L	UTR3	UCEC	TTTAAT	-	PPIE	Gain	1	530	0.00188679245283019
12	115959564	->T	MED13L	UTR3	UCEC	TTTCTTT	-	PTBP1,RALYL	Gain	1	530	0.00188679245283019
12	115959592	G>A	MED13L	UTR3	UCEC	AAAATCA	+	IGF2BP3,IGF2BP2	Gain	1	530	0.00188679245283019
12	115959592	G>A	MED13L	UTR3	UCEC	AAATCAA	+	A1CF	Gain	1	530	0.00188679245283019
12	115959592	G>A	MED13L	UTR3	UCEC	AATCAAT	+	RBM46	Gain	1	530	0.00188679245283019
12	115959592	C>T	MED13L	UTR3	UCEC	ACTTTAA	-	HNRNPDL	Loss	1	530	0.00188679245283019
12	115959592	C>T	MED13L	UTR3	UCEC	ATTTTA	-	PPIE,TIAL1,KHSRP	Gain	1	530	0.00188679245283019
12	115959592	G>A	MED13L	UTR3	UCEC	TAAAAT	+	PPIE	Gain	1	530	0.00188679245283019
12	115959592	G>A	MED13L	UTR3	UCEC	TTAAAA	+	KHDRBS1,PPIE	Gain	1	530	0.00188679245283019
12	115959592	C>T	MED13L	UTR3	UCEC	TTGATTT	-	SFPQ,ELAVL1	Gain	1	530	0.00188679245283019
12	115959592	C>T	MED13L	UTR3	UCEC	TTTTAA	-	PPIE	Gain	1	530	0.00188679245283019
12	115959642	A>C	MED13L	UTR3	UCEC	AAAAAA	-	PPIE	Loss	1	530	0.00188679245283019
12	115959642	A>C	MED13L	UTR3	UCEC	AAAAAT	-	PPIE	Loss	1	530	0.00188679245283019
12	115959642	A>C	MED13L	UTR3	UCEC	AACATC	-	YBX1,ybx2-a,ybx2-a	Gain	1	530	0.00188679245283019
12	115959642	A>C	MED13L	UTR3	UCEC	AACATCT	-	YBX1,YBX2	Gain	1	530	0.00188679245283019
12	115959642	A>C	MED13L	UTR3	UCEC	ATAAAAA	-	KHDRBS1	Loss	1	530	0.00188679245283019
12	115959642	A>C	MED13L	UTR3	UCEC	ATAAAAC	-	KHDRBS3,KHDRBS1	Gain	1	530	0.00188679245283019
12	115959642	T>G	MED13L	UTR3	UCEC	ATTTTT	+	PPIE	Loss	1	530	0.00188679245283019
12	115959642	T>G	MED13L	UTR3	UCEC	ATTTTTT	+	HNRNPCL1,HNRNPC,TIA1,PTBP1,BOLL,HNRNPC,HNRNPCL1,Smp067420,HNRNPC,HNRNPCL1	Loss	1	530	0.00188679245283019
12	115959642	A>C	MED13L	UTR3	UCEC	CATCTG	-	YBX1	Gain	1	530	0.00188679245283019
12	115959642	T>G	MED13L	UTR3	UCEC	GTTTTA	+	TIA1	Gain	1	530	0.00188679245283019
12	115959642	A>C	MED13L	UTR3	UCEC	TAAAAA	-	PPIE	Loss	1	530	0.00188679245283019
12	115959642	T>G	MED13L	UTR3	UCEC	TTTTTA	+	PPIE,HNRNPC	Loss	1	530	0.00188679245283019
12	115959642	T>G	MED13L	UTR3	UCEC	TTTTTT	+	KHDRBS1,HNRNPC,DDX19B,EIF4A3,PPIE,CPEB4	Loss	1	530	0.00188679245283019
12	115959642	T>G	MED13L	UTR3	UCEC	TTTTTTA	+	CPEB1	Loss	1	530	0.00188679245283019
12	115959752	A>-	MED13L	UTR3	UCEC	AAAAAA	-	PPIE	Loss	5	530	0.00943396226415094
12	115959752	A>-	MED13L	UTR3	UCEC	AAAAAAA	-	ELAVL4,PCBP1,SYNCRIP,HNRNPU,FMR1,RBM5,IGHMBP2,PABPC4,FUS,HNRNPD,SART3,HNRNPK,PABPC1,DAZAP1,HNRNPA1,LmjF354130,PABPC4,PABPC4	Loss	5	530	0.00943396226415094
12	115959752	A>-	MED13L	UTR3	UCEC	AAAAAAAA	-	IGHMBP2,PABPC1	Loss	5	530	0.00943396226415094
12	115959752	A>-	MED13L	UTR3	UCEC	AAAAAAAAA	-	AGO2	Loss	5	530	0.00943396226415094
12	115959752	T>-	MED13L	UTR3	UCEC	TTTTTT	+	KHDRBS1,HNRNPC,DDX19B,EIF4A3,PPIE,CPEB4	Loss	5	530	0.00943396226415094
12	115959752	T>-	MED13L	UTR3	UCEC	TTTTTTT	+	DAZAP1,TIA1,ELAVL1,ELAVL4,PCBP1,U2AF2,HNRNPCL1,HNRNPA1,HNRNPC,FUS,NOVA1,SFPQ,NOVA2,KHDRBS2,PCBP2,RALY,KHDRBS1,FMR1,ELAVL3,KHDRBS3,HNRNPU,DDX19B,HNRNPK,SYNCRIP,PTBP1,egw103003671,ELAVL1,gw184451,HNRNPC,HNRNPCL1,PUF60,Sxl,TVAG514790	Loss	5	530	0.00943396226415094
12	115959752	T>-	MED13L	UTR3	UCEC	TTTTTTTTT	+	TIA1	Loss	5	530	0.00943396226415094
12	115959961	C>A	MED13L	UTR3	UCEC	ACACACA	+	HNRNPLL,HNRNPL,IGF2BP3,IGF2BP2,CNOT4,HNRNPL,hnRNPLL,sm,HNRNPL,HNRPLL	Gain	1	530	0.00188679245283019
12	115959961	C>A	MED13L	UTR3	UCEC	ACACCCA	+	NUPL2	Loss	1	530	0.00188679245283019
12	115959961	G>T	MED13L	UTR3	UCEC	AGTGTGT	-	RBM24	Gain	1	530	0.00188679245283019
12	115959961	G>T	MED13L	UTR3	UCEC	CAGTGG	-	ACO1	Loss	1	530	0.00188679245283019
12	115959961	G>T	MED13L	UTR3	UCEC	CAGTGT	-	ACO1	Gain	1	530	0.00188679245283019
12	115959961	G>T	MED13L	UTR3	UCEC	GGGTGT	-	FUS	Loss	1	530	0.00188679245283019
12	115959961	G>T	MED13L	UTR3	UCEC	GGTGTGT	-	CELF4	Loss	1	530	0.00188679245283019
12	115959961	G>T	MED13L	UTR3	UCEC	GTGTGT	-	CELF2	Gain	1	530	0.00188679245283019
12	115959961	G>T	MED13L	UTR3	UCEC	GTGTGTG	-	ENSDARG00000058818,RBM24,Rbm38	Gain	1	530	0.00188679245283019
12	115959961	G>T	MED13L	UTR3	UCEC	GTGTGTGT	-	KHSRP	Gain	1	530	0.00188679245283019
12	115959961	G>T	MED13L	UTR3	UCEC	TGTGTG	-	CELF1,TARDBP,CELF2	Gain	1	530	0.00188679245283019
12	115959961	G>T	MED13L	UTR3	UCEC	TGTGTGT	-	RBM24,CELF5,CELF1,CELF4,aret,aretCONSTRUCT,BRUNOL4,BRUNOL5,papi,BRUNOL4,BRUNOL5	Gain	1	530	0.00188679245283019
12	115959961	G>T	MED13L	UTR3	UCEC	TGTGTGTG	-	CELF1,TARDBP	Gain	1	530	0.00188679245283019
12	115959961	G>T	MED13L	UTR3	UCEC	TGTGTGTGT	-	CELF1	Gain	1	530	0.00188679245283019
12	115960032	C>A	MED13L	UTR3	UCEC	CATTCAT	-	NOVA1	Gain	1	530	0.00188679245283019
12	115960032	G>T	MED13L	UTR3	UCEC	TGAATGAG	+	TARDBP	Gain	1	530	0.00188679245283019
12	115960084	->A	MED13L	UTR3	UCEC	AAAAATA	-	NUPL2,PABPN1L	Gain	1	530	0.00188679245283019
12	115960084	->A	MED13L	UTR3	UCEC	AAAATA	-	PPIE	Gain	1	530	0.00188679245283019
12	115960084	->T	MED13L	UTR3	UCEC	CATTTTT	+	CPEB2,HNRNPC,RALYL	Loss	1	530	0.00188679245283019
12	115960084	->T	MED13L	UTR3	UCEC	TATTTT	+	PPIE	Gain	1	530	0.00188679245283019
12	115960084	->T	MED13L	UTR3	UCEC	TATTTTT	+	TRNAU1AP	Gain	1	530	0.00188679245283019
12	115960170	C>A	MED13L	UTR3	UCEC	CCTATGG	+	RC3H1	Loss	1	530	0.00188679245283019
12	115960170	G>T	MED13L	UTR3	UCEC	TAGGAA	-	HNRNPA1	Loss	1	530	0.00188679245283019
12	115960175	G>A	MED13L	UTR3	UCEC	CCTATGG	+	RC3H1	Loss	1	530	0.00188679245283019
12	115960175	C>T	MED13L	UTR3	UCEC	GATCATA	-	RBM46	Gain	1	530	0.00188679245283019
12	115960270	G>T	MED13L	UTR3	UCEC	AGAGACC	+	SRSF10	Loss	1	530	0.00188679245283019
12	115960270	G>T	MED13L	UTR3	UCEC	AGAGGAG	+	SRSF10	Loss	1	530	0.00188679245283019
12	115960270	G>T	MED13L	UTR3	UCEC	AGGAGA	+	SRSF1	Loss	1	530	0.00188679245283019
12	115960270	G>T	MED13L	UTR3	UCEC	AGGAGAG	+	SRSF9,SRSF2,SRSF2	Loss	1	530	0.00188679245283019
12	115960270	G>T	MED13L	UTR3	UCEC	AGGATAG	+	G3BP2	Gain	1	530	0.00188679245283019
12	115960270	G>T	MED13L	UTR3	UCEC	AGGATAGA	+	HNRNPA2B1	Gain	1	530	0.00188679245283019
12	115960270	G>T	MED13L	UTR3	UCEC	GAGGAG	+	SRSF2,HNRNPA1	Loss	1	530	0.00188679245283019
12	115960270	G>T	MED13L	UTR3	UCEC	GGAGAG	+	SRSF2	Loss	1	530	0.00188679245283019
12	115960270	C>A	MED13L	UTR3	UCEC	TCTCTC	-	PTBP1	Loss	1	530	0.00188679245283019
12	115960428	C>A	MED13L	UTR3	UCEC	ATGCCA	-	MBNL1	Gain	1	530	0.00188679245283019
12	115960428	C>A	MED13L	UTR3	UCEC	CTGCCA	-	MBNL1	Loss	1	530	0.00188679245283019
12	115960428	G>T	MED13L	UTR3	UCEC	GCATAA	+	OAS1	Gain	1	530	0.00188679245283019
12	115960869	G>A	MED13L	UTR3	UCEC	AAGAAG	+	SRSF11,TRA2B	Gain	1	530	0.00188679245283019
12	115960869	G>A	MED13L	UTR3	UCEC	AAGAAGA	+	TRA2A	Gain	1	530	0.00188679245283019
12	115960869	G>A	MED13L	UTR3	UCEC	AAGAGGA	+	SRSF1	Loss	1	530	0.00188679245283019
12	115960869	G>A	MED13L	UTR3	UCEC	AGAAGA	+	PABPN1	Gain	1	530	0.00188679245283019
12	115960869	C>T	MED13L	UTR3	UCEC	ATCTTC	-	PTBP1	Gain	1	530	0.00188679245283019
12	115960869	C>T	MED13L	UTR3	UCEC	CTCTTA	-	PTBP1	Loss	1	530	0.00188679245283019
12	115960869	C>T	MED13L	UTR3	UCEC	TCCTCT	-	ZFP36	Loss	1	530	0.00188679245283019
12	115960869	C>T	MED13L	UTR3	UCEC	TCTTCT	-	ZFP36	Gain	1	530	0.00188679245283019
12	115960869	C>T	MED13L	UTR3	UCEC	TCTTCTT	-	PTBP1	Gain	1	530	0.00188679245283019
12	115961137	A>G	MED13L	UTR3	UCEC	GAAGGAA	+	RBM5,HNRNPM,RBM5	Loss	1	530	0.00188679245283019
12	115961137	A>G	MED13L	UTR3	UCEC	GAAGGAG	+	SRSF1,RBM5,RBM5	Gain	1	530	0.00188679245283019
12	116019413	C>A	MED13L	splicing	UCEC	ACCACC	+	NOVA2,NOVA1	Loss	1	530	0.00188679245283019
12	116019413	C>A	MED13L	splicing	UCEC	ATATAA	+	PPIE	Gain	1	530	0.00188679245283019
12	116019413	C>A	MED13L	splicing	UCEC	ATATAAG	+	PRR3	Gain	1	530	0.00188679245283019
[truncated: 24,162 more rows]
