# Supplementary material for: Comprehensive Analysis of Co-Mutations Identifies Cooperating Mechanisms of Tumorigenesis
Source: Cancers (Basel). 2022 Jan 14;14(2):415. doi: 10.3390/cancers14020415 (PMC8774165; doi:10.3390/cancers14020415)
Supplement: Supplementary file 1 [file cancers-14-00415-s001.zip › Supplementary Table S7.csv]

Chromosome	Location	Mutation	project	start_Location	end_Location	Strand	miRNA	genes_name	Region	Freq	number	Frequency
10	60028628	T>C	UCEC	60028627	60028632	-	hsa-miR-509-3p	ANK3	UTR3	1	530	0.001886792
10	60028831	G>-	UCEC	60028830	60028836	-	hsa-miR-4640-3p	ANK3	UTR3	1	530	0.001886792
10	60028856	A>G	UCEC	60028853	60028859	-	hsa-miR-154-5p	ANK3	UTR3	1	530	0.001886792
10	60028863	A>C	UCEC	60028863	60028868	-	hsa-miR-129-5p	ANK3	UTR3	1	530	0.001886792
10	60029382	T>G	UCEC	60029382	60029387	-	hsa-miR-186-5p	ANK3	UTR3	1	530	0.001886792
10	68691931	->A	UCEC	68691918	68691943	+	hsa-miR-126-5p	TET1	UTR3	1	530	0.001886792
10	68691931	->A	UCEC	68691929	68691935	+	hsa-miR-2681-5p	TET1	UTR3	1	530	0.001886792
10	68691990	A>G	UCEC	68691981	68692009	+	hsa-miR-500a-3p	TET1	UTR3	1	530	0.001886792
10	68692468	T>C	UCEC	68692441	68692469	+	hsa-miR-126-5p	TET1	UTR3	1	530	0.001886792
10	68692468	T>C	UCEC	68692468	68692473	+	hsa-miR-625-3p	TET1	UTR3	1	530	0.001886792
10	68692468	T>C	UCEC	68692464	68692470	+	hsa-miR-656-3p	TET1	UTR3	1	530	0.001886792
10	68693247	T>C	UCEC	68693225	68693253	+	hsa-miR-494-3p	TET1	UTR3	1	530	0.001886792
10	68693252	C>T	UCEC	68693225	68693253	+	hsa-miR-494-3p	TET1	UTR3	1	530	0.001886792
10	68693430	C>A	UCEC	68693417	68693438	+	hsa-miR-370-3p	TET1	UTR3	1	530	0.001886792
10	68693497	T>G	UCEC	68693497	68693502	+	hsa-miR-371a-5p	TET1	UTR3	1	530	0.001886792
10	68693497	T>G	UCEC	68693495	68693500	+	hsa-miR-548o-3p	TET1	UTR3	1	530	0.001886792
10	68693497	T>G	UCEC	68693495	68693500	+	hsa-miR-1323	TET1	UTR3	1	530	0.001886792
10	87965622	C>T	UCEC	87965615	87965643	+	hsa-miR-548o-3p	PTEN	UTR3	1	530	0.001886792
10	87965622	C>T	UCEC	87965603	87965631	+	hsa-miR-3171	PTEN	UTR3	1	530	0.001886792
10	87965622	C>T	UCEC	87965615	87965643	+	hsa-miR-1323	PTEN	UTR3	1	530	0.001886792
10	87965622	C>T	UCEC	87965617	87965639	+	hsa-miR-10a-5p	PTEN	UTR3	1	530	0.001886792
10	87965622	C>T	UCEC	87965617	87965639	+	hsa-miR-10b-5p	PTEN	UTR3	1	530	0.001886792
10	87965753	C>T	UCEC	87965744	87965772	+	hsa-miR-3163	PTEN	UTR3	1	530	0.001886792
10	87965890	T>G	UCEC	87965886	87965891	+	hsa-miR-302d-3p	PTEN	UTR3	1	530	0.001886792
10	87965890	T>G	UCEC	87965886	87965891	+	hsa-miR-302a-3p	PTEN	UTR3	1	530	0.001886792
10	87965890	T>G	UCEC	87965885	87965891	+	hsa-miR-519c-3p	PTEN	UTR3	1	530	0.001886792
10	87965890	T>G	UCEC	87965884	87965890	+	hsa-miR-3666	PTEN	UTR3	1	530	0.001886792
10	87965890	T>G	UCEC	87965886	87965891	+	hsa-miR-373-3p	PTEN	UTR3	1	530	0.001886792
10	87965890	T>G	UCEC	87965886	87965891	+	hsa-miR-520c-3p	PTEN	UTR3	1	530	0.001886792
10	87965890	T>G	UCEC	87965885	87965891	+	hsa-miR-519b-3p	PTEN	UTR3	1	530	0.001886792
10	87965890	T>G	UCEC	87965884	87965890	+	hsa-miR-4295	PTEN	UTR3	1	530	0.001886792
10	87965890	T>G	UCEC	87965886	87965891	+	hsa-miR-302c-3p	PTEN	UTR3	1	530	0.001886792
10	87965890	T>G	UCEC	87965884	87965890	+	hsa-miR-301b-3p	PTEN	UTR3	1	530	0.001886792
10	87965890	T>G	UCEC	87965886	87965891	+	hsa-miR-372-3p	PTEN	UTR3	1	530	0.001886792
10	87965890	T>G	UCEC	87965886	87965891	+	hsa-miR-520b	PTEN	UTR3	1	530	0.001886792
10	87965890	T>G	UCEC	87965886	87965891	+	hsa-miR-520a-3p	PTEN	UTR3	1	530	0.001886792
10	87965890	T>G	UCEC	87965886	87965891	+	hsa-miR-302e	PTEN	UTR3	1	530	0.001886792
10	87965890	T>G	UCEC	87965886	87965891	+	hsa-miR-302b-3p	PTEN	UTR3	1	530	0.001886792
10	87965890	T>G	UCEC	87965884	87965890	+	hsa-miR-454-3p	PTEN	UTR3	1	530	0.001886792
10	87965890	T>G	UCEC	87965885	87965891	+	hsa-miR-519a-3p	PTEN	UTR3	1	530	0.001886792
10	87965890	T>G	UCEC	87965886	87965891	+	hsa-miR-520e	PTEN	UTR3	1	530	0.001886792
10	87965890	T>G	UCEC	87965886	87965891	+	hsa-miR-520d-3p	PTEN	UTR3	1	530	0.001886792
10	87965890	T>G	UCEC	87965884	87965890	+	hsa-miR-130b-3p	PTEN	UTR3	1	530	0.001886792
10	87965890	T>G	UCEC	87965884	87965890	+	hsa-miR-301a-3p	PTEN	UTR3	1	530	0.001886792
10	87965890	T>G	UCEC	87965884	87965890	+	hsa-miR-130a-3p	PTEN	UTR3	1	530	0.001886792
10	87966007	T>G	UCEC	87965983	87966011	+	hsa-miR-3163	PTEN	UTR3	1	530	0.001886792
10	87966127	G>A	UCEC	87966123	87966151	+	hsa-miR-323b-3p	PTEN	UTR3	1	530	0.001886792
10	87966130	T>-	UCEC	87966123	87966151	+	hsa-miR-323b-3p	PTEN	UTR3	9	530	0.016981132
10	87966147	T>C	UCEC	87966123	87966151	+	hsa-miR-323b-3p	PTEN	UTR3	1	530	0.001886792
10	87966243	A>-	UCEC	87966224	87966252	+	hsa-miR-126-5p	PTEN	UTR3	1	530	0.001886792
10	87966576	T>G	UCEC	87966576	87966581	+	hsa-miR-513c-5p	PTEN	UTR3	1	530	0.001886792
10	87966576	T>G	UCEC	87966575	87966580	+	hsa-miR-371a-5p	PTEN	UTR3	1	530	0.001886792
10	87966576	T>G	UCEC	87966576	87966581	+	hsa-miR-514b-5p	PTEN	UTR3	1	530	0.001886792
10	87966621	G>A	UCEC	87966620	87966625	+	hsa-miR-130a-3p	PTEN	UTR3	1	530	0.001886792
10	87966621	G>A	UCEC	87966621	87966626	+	hsa-miR-302d-3p	PTEN	UTR3	1	530	0.001886792
10	87966621	G>A	UCEC	87966621	87966626	+	hsa-miR-302a-3p	PTEN	UTR3	1	530	0.001886792
10	87966621	G>A	UCEC	87966620	87966626	+	hsa-miR-519c-3p	PTEN	UTR3	1	530	0.001886792
10	87966621	G>A	UCEC	87966620	87966625	+	hsa-miR-3666	PTEN	UTR3	1	530	0.001886792
10	87966621	G>A	UCEC	87966621	87966626	+	hsa-miR-373-3p	PTEN	UTR3	1	530	0.001886792
10	87966621	G>A	UCEC	87966621	87966626	+	hsa-miR-520c-3p	PTEN	UTR3	1	530	0.001886792
10	87966621	G>A	UCEC	87966621	87966626	+	hsa-miR-302e	PTEN	UTR3	1	530	0.001886792
10	87966621	G>A	UCEC	87966620	87966625	+	hsa-miR-4295	PTEN	UTR3	1	530	0.001886792
10	87966621	G>A	UCEC	87966620	87966625	+	hsa-miR-301b-3p	PTEN	UTR3	1	530	0.001886792
10	87966621	G>A	UCEC	87966621	87966626	+	hsa-miR-302c-3p	PTEN	UTR3	1	530	0.001886792
10	87966621	G>A	UCEC	87966621	87966626	+	hsa-miR-372-3p	PTEN	UTR3	1	530	0.001886792
10	87966621	G>A	UCEC	87966621	87966626	+	hsa-miR-520b	PTEN	UTR3	1	530	0.001886792
10	87966621	G>A	UCEC	87966621	87966626	+	hsa-miR-520a-3p	PTEN	UTR3	1	530	0.001886792
10	87966621	G>A	UCEC	87966620	87966626	+	hsa-miR-519b-3p	PTEN	UTR3	1	530	0.001886792
10	87966621	G>A	UCEC	87966621	87966626	+	hsa-miR-302b-3p	PTEN	UTR3	1	530	0.001886792
10	87966621	G>A	UCEC	87966620	87966625	+	hsa-miR-454-3p	PTEN	UTR3	1	530	0.001886792
10	87966621	G>A	UCEC	87966620	87966626	+	hsa-miR-519a-3p	PTEN	UTR3	1	530	0.001886792
10	87966621	G>A	UCEC	87966621	87966626	+	hsa-miR-520e	PTEN	UTR3	1	530	0.001886792
10	87966621	G>A	UCEC	87966621	87966626	+	hsa-miR-520d-3p	PTEN	UTR3	1	530	0.001886792
10	87966621	G>A	UCEC	87966620	87966625	+	hsa-miR-130b-3p	PTEN	UTR3	1	530	0.001886792
10	87966621	G>A	UCEC	87966620	87966625	+	hsa-miR-301a-3p	PTEN	UTR3	1	530	0.001886792
10	87966731	T>G	UCEC	87966726	87966754	+	hsa-miR-3924	PTEN	UTR3	1	530	0.001886792
10	87966806	G>A	UCEC	87966802	87966807	+	hsa-miR-217	PTEN	UTR3	1	530	0.001886792
10	87966806	G>A	UCEC	87966802	87966808	+	hsa-miR-6807-3p	PTEN	UTR3	1	530	0.001886792
10	87966827	->A	UCEC	87966823	87966828	+	hsa-miR-147a	PTEN	UTR3	2	530	0.003773585
10	87966827	->A	UCEC	87966827	87966832	+	hsa-miR-129-5p	PTEN	UTR3	2	530	0.003773585
10	87966827	->A	UCEC	87966824	87966829	+	hsa-miR-599	PTEN	UTR3	2	530	0.003773585
10	87967043	A>G	UCEC	87967042	87967047	+	hsa-miR-487b-3p	PTEN	UTR3	1	530	0.001886792
10	87967141	C>A	UCEC	87967139	87967144	+	hsa-miR-493-3p	PTEN	UTR3	1	530	0.001886792
10	87967271	G>T	UCEC	87967251	87967279	+	hsa-miR-202-5p	PTEN	UTR3	1	530	0.001886792
10	87967436	T>C	UCEC	87967436	87967441	+	hsa-miR-410-3p	PTEN	UTR3	1	530	0.001886792
10	87967436	T>C	UCEC	87967435	87967440	+	hsa-miR-340-5p	PTEN	UTR3	1	530	0.001886792
10	87967709	A>G	UCEC	87967705	87967710	+	hsa-miR-616-3p	PTEN	UTR3	1	530	0.001886792
10	87967796	T>C	UCEC	87967796	87967824	+	hsa-miR-3163	PTEN	UTR3	1	530	0.001886792
10	87967796	T>C	UCEC	87967791	87967819	+	hsa-miR-379-3p	PTEN	UTR3	1	530	0.001886792
10	87967796	T>C	UCEC	87967792	87967797	+	hsa-miR-543	PTEN	UTR3	1	530	0.001886792
10	87967796	T>C	UCEC	87967791	87967819	+	hsa-miR-411-3p	PTEN	UTR3	1	530	0.001886792
10	87967863	->TA	UCEC	87967858	87967864	+	hsa-miR-1277-5p	PTEN	UTR3	1	530	0.001886792
10	87967863	->TA	UCEC	87967861	87967866	+	hsa-miR-369-3p	PTEN	UTR3	1	530	0.001886792
10	87967863	->TA	UCEC	87967863	87967868	+	hsa-miR-410-3p	PTEN	UTR3	1	530	0.001886792
10	87967863	->TA	UCEC	87967860	87967865	+	hsa-miR-889-3p	PTEN	UTR3	1	530	0.001886792
10	87967863	->TA	UCEC	87967863	87967891	+	hsa-miR-3924	PTEN	UTR3	1	530	0.001886792
10	87968435	C>T	UCEC	87968433	87968438	+	hsa-miR-301a-3p	PTEN	UTR3	1	530	0.001886792
10	87968435	C>T	UCEC	87968433	87968438	+	hsa-miR-3666	PTEN	UTR3	1	530	0.001886792
10	87968435	C>T	UCEC	87968433	87968438	+	hsa-miR-130a-3p	PTEN	UTR3	1	530	0.001886792
10	87968435	C>T	UCEC	87968433	87968438	+	hsa-miR-454-3p	PTEN	UTR3	1	530	0.001886792
10	87968435	C>T	UCEC	87968433	87968438	+	hsa-miR-301b-3p	PTEN	UTR3	1	530	0.001886792
10	87968435	C>T	UCEC	87968433	87968438	+	hsa-miR-4295	PTEN	UTR3	1	530	0.001886792
10	87968435	C>T	UCEC	87968433	87968438	+	hsa-miR-130b-3p	PTEN	UTR3	1	530	0.001886792
10	87968505	C>A	UCEC	87968503	87968508	+	hsa-miR-552-3p	PTEN	UTR3	1	530	0.001886792
10	87968529	C>A	UCEC	87968519	87968547	+	hsa-miR-499b-5p	PTEN	UTR3	1	530	0.001886792
10	87968663	G>T	UCEC	87968658	87968664	+	hsa-miR-486-5p	PTEN	UTR3	1	530	0.001886792
10	87968691	C>T	UCEC	87968690	87968695	+	hsa-miR-522-3p	PTEN	UTR3	1	530	0.001886792
10	87968691	C>T	UCEC	87968691	87968696	+	hsa-miR-105-5p	PTEN	UTR3	1	530	0.001886792
10	87968691	C>T	UCEC	87968668	87968696	+	hsa-miR-224-3p	PTEN	UTR3	1	530	0.001886792
10	92029310	G>T	UCEC	92029296	92029324	+	hsa-miR-3163	BTAF1	UTR3	1	530	0.001886792
10	92029398	C>A	UCEC	92029393	92029398	+	hsa-miR-616-3p	BTAF1	UTR3	1	530	0.001886792
10	92029398	C>A	UCEC	92029398	92029403	+	hsa-miR-376b-3p	BTAF1	UTR3	1	530	0.001886792
10	92029398	C>A	UCEC	92029398	92029403	+	hsa-miR-376a-3p	BTAF1	UTR3	1	530	0.001886792
10	92029975	T>C	UCEC	92029950	92029978	+	hsa-miR-197-3p	BTAF1	UTR3	1	530	0.001886792
10	92030319	TG>-	UCEC	92030316	92030322	+	hsa-miR-582-5p	BTAF1	UTR3	1	530	0.001886792
11	103479286	->AAGCT	UCEC	103479284	103479290	+	hsa-miR-204-5p	DYNC2H1	UTR3	1	530	0.001886792
11	103479286	->AAGCT	UCEC	103479284	103479290	+	hsa-miR-211-5p	DYNC2H1	UTR3	1	530	0.001886792
11	103479286	->AAGCT	UCEC	103479286	103479292	+	hsa-miR-642b-5p	DYNC2H1	UTR3	1	530	0.001886792
11	103479337	T>G	UCEC	103479334	103479339	+	hsa-miR-105-5p	DYNC2H1	UTR3	1	530	0.001886792
11	62433664	T>G	UCEC	62433659	62433664	-	hsa-miR-186-5p	AHNAK	UTR3	1	530	0.001886792
11	62515956	G>T	UCEC	62515951	62515956	-	hsa-miR-181c-5p	AHNAK	UTR3	1	530	0.001886792
11	62515956	G>T	UCEC	62515951	62515956	-	hsa-miR-181b-5p	AHNAK	UTR3	1	530	0.001886792
11	62515956	G>T	UCEC	62515951	62515956	-	hsa-miR-181a-5p	AHNAK	UTR3	1	530	0.001886792
11	62515956	G>T	UCEC	62515950	62515956	-	hsa-miR-4262	AHNAK	UTR3	1	530	0.001886792
11	62515956	G>T	UCEC	62515951	62515956	-	hsa-miR-181d-5p	AHNAK	UTR3	1	530	0.001886792
11	62516483	->AT	UCEC	62516482	62516510	-	hsa-miR-1277-5p	AHNAK	UTR3	1	530	0.001886792
11	62516641	A>G	UCEC	62516638	62516643	-	hsa-miR-628-5p	AHNAK	UTR3	1	530	0.001886792
11	62516722	CA>-	UCEC	62516722	62516727	-	hsa-miR-493-5p	AHNAK	UTR3	1	530	0.001886792
12	101128332	C>A	UCEC	101128315	101128336	+	hsa-miR-186-5p	ANO4	UTR3	1	530	0.001886792
12	101128595	G>A	UCEC	101128594	101128599	+	hsa-miR-32-5p	ANO4	UTR3	1	530	0.001886792
12	101128595	G>A	UCEC	101128594	101128599	+	hsa-miR-363-3p	ANO4	UTR3	1	530	0.001886792
12	101128595	G>A	UCEC	101128595	101128600	+	hsa-miR-137	ANO4	UTR3	1	530	0.001886792
12	101128595	G>A	UCEC	101128594	101128599	+	hsa-miR-92b-3p	ANO4	UTR3	1	530	0.001886792
12	101128595	G>A	UCEC	101128594	101128599	+	hsa-miR-25-3p	ANO4	UTR3	1	530	0.001886792
12	101128595	G>A	UCEC	101128594	101128599	+	hsa-miR-367-3p	ANO4	UTR3	1	530	0.001886792
12	101128595	G>A	UCEC	101128594	101128599	+	hsa-miR-92a-3p	ANO4	UTR3	1	530	0.001886792
12	115958792	T>C	UCEC	115958788	115958793	-	hsa-miR-410-3p	MED13L	UTR3	1	530	0.001886792
12	115958792	T>C	UCEC	115958790	115958795	-	hsa-miR-3163	MED13L	UTR3	1	530	0.001886792
12	115958792	T>C	UCEC	115958789	115958794	-	hsa-miR-340-5p	MED13L	UTR3	1	530	0.001886792
12	115958888	G>T	UCEC	115958887	115958915	-	hsa-miR-4766-5p	MED13L	UTR3	1	530	0.001886792
12	115958888	G>T	UCEC	115958865	115958893	-	hsa-miR-3140-3p	MED13L	UTR3	1	530	0.001886792
12	115958905	C>T	UCEC	115958899	115958905	-	hsa-miR-381-3p	MED13L	UTR3	1	530	0.001886792
12	115958905	C>T	UCEC	115958891	115958919	-	hsa-miR-1277-5p	MED13L	UTR3	1	530	0.001886792
12	115958905	C>T	UCEC	115958887	115958915	-	hsa-miR-4766-5p	MED13L	UTR3	1	530	0.001886792
12	115958905	C>T	UCEC	115958899	115958905	-	hsa-miR-300	MED13L	UTR3	1	530	0.001886792
12	115959027	G>T	UCEC	115959024	115959029	-	hsa-miR-942-5p	MED13L	UTR3	1	530	0.001886792
12	115959077	T>G	UCEC	115959070	115959098	-	hsa-miR-545-5p	MED13L	UTR3	1	530	0.001886792
12	115959123	C>A	UCEC	115959121	115959127	-	hsa-miR-499b-5p	MED13L	UTR3	1	530	0.001886792
12	115959316	->A	UCEC	115959308	115959328	-	hsa-miR-129-5p	MED13L	UTR3	1	530	0.001886792
12	115959316	->A	UCEC	115959312	115959317	-	hsa-miR-599	MED13L	UTR3	1	530	0.001886792
12	115959338	C>A	UCEC	115959338	115959343	-	hsa-miR-219a-2-3p	MED13L	UTR3	1	530	0.001886792
12	115959457	A>T	UCEC	115959435	115959463	-	hsa-miR-526b-3p	MED13L	UTR3	1	530	0.001886792
12	115959544	C>T	UCEC	115959541	115959547	-	hsa-miR-580-3p	MED13L	UTR3	1	530	0.001886792
12	115959592	C>T	UCEC	115959590	115959595	-	hsa-miR-224-5p	MED13L	UTR3	1	530	0.001886792
12	115959642	A>C	UCEC	115959620	115959648	-	hsa-miR-224-3p	MED13L	UTR3	1	530	0.001886792
12	115959961	G>T	UCEC	115959955	115959961	-	hsa-miR-329-3p	MED13L	UTR3	1	530	0.001886792
12	115959961	G>T	UCEC	115959955	115959961	-	hsa-miR-362-3p	MED13L	UTR3	1	530	0.001886792
12	115960032	C>A	UCEC	115960032	115960037	-	hsa-miR-613	MED13L	UTR3	1	530	0.001886792
12	115960032	C>A	UCEC	115960026	115960032	-	hsa-miR-4640-5p	MED13L	UTR3	1	530	0.001886792
12	115960032	C>A	UCEC	115960032	115960037	-	hsa-miR-1-3p	MED13L	UTR3	1	530	0.001886792
12	115960032	C>A	UCEC	115960026	115960032	-	hsa-miR-4726-5p	MED13L	UTR3	1	530	0.001886792
12	115960032	C>A	UCEC	115960032	115960037	-	hsa-miR-206	MED13L	UTR3	1	530	0.001886792
12	115960032	C>A	UCEC	115960029	115960034	-	hsa-miR-665	MED13L	UTR3	1	530	0.001886792
12	115960032	C>A	UCEC	115960030	115960035	-	hsa-miR-873-5p	MED13L	UTR3	1	530	0.001886792
12	115960084	->A	UCEC	115960079	115960084	-	hsa-miR-124-3p	MED13L	UTR3	1	530	0.001886792
12	115960084	->A	UCEC	115960079	115960084	-	hsa-miR-506-3p	MED13L	UTR3	1	530	0.001886792
12	115960170	G>T	UCEC	115960168	115960173	-	hsa-miR-337-3p	MED13L	UTR3	1	530	0.001886792
12	115960170	G>T	UCEC	115960168	115960173	-	hsa-miR-202-5p	MED13L	UTR3	1	530	0.001886792
12	115960170	G>T	UCEC	115960167	115960172	-	hsa-miR-384	MED13L	UTR3	1	530	0.001886792
12	115960175	C>T	UCEC	115960171	115960176	-	hsa-miR-584-5p	MED13L	UTR3	1	530	0.001886792
12	115960270	C>A	UCEC	115960267	115960273	-	hsa-miR-4306	MED13L	UTR3	1	530	0.001886792
12	115960270	C>A	UCEC	115960267	115960272	-	hsa-miR-185-5p	MED13L	UTR3	1	530	0.001886792
12	115960270	C>A	UCEC	115960267	115960273	-	hsa-miR-4644	MED13L	UTR3	1	530	0.001886792
12	115960270	C>A	UCEC	115960265	115960271	-	hsa-miR-4784	MED13L	UTR3	1	530	0.001886792
12	115960270	C>A	UCEC	115960270	115960276	-	hsa-miR-769-5p	MED13L	UTR3	1	530	0.001886792
12	115960270	C>A	UCEC	115960265	115960271	-	hsa-miR-3150b-3p	MED13L	UTR3	1	530	0.001886792
12	115960869	C>T	UCEC	115960869	115960875	-	hsa-miR-876-5p	MED13L	UTR3	1	530	0.001886792
12	115960869	C>T	UCEC	115960867	115960872	-	hsa-miR-1185-5p	MED13L	UTR3	1	530	0.001886792
12	115960869	C>T	UCEC	115960856	115960884	-	hsa-miR-545-5p	MED13L	UTR3	1	530	0.001886792
12	115961137	T>C	UCEC	115961131	115961137	-	hsa-miR-1252-5p	MED13L	UTR3	1	530	0.001886792
12	25204979	C>A	UCEC	25204977	25204982	+	hsa-miR-186-5p	ETFRF1	UTR3	1	530	0.001886792
12	25204979	C>A	UCEC	25204974	25204979	+	hsa-miR-493-3p	ETFRF1	UTR3	1	530	0.001886792
12	25205569	T>C	UCEC	25205561	25205589	-	hsa-miR-3121-3p	KRAS	UTR3	1	530	0.001886792
12	25205569	T>C	UCEC	25205566	25205571	-	hsa-miR-1278	KRAS	UTR3	1	530	0.001886792
12	25205576	T>G	UCEC	25205561	25205589	-	hsa-miR-3121-3p	KRAS	UTR3	1	530	0.001886792
12	25205576	T>G	UCEC	25205570	25205577	-	hsa-miR-325	KRAS	UTR3	1	530	0.001886792
12	25205584	C>T	UCEC	25205561	25205589	-	hsa-miR-3121-3p	KRAS	UTR3	1	530	0.001886792
12	25205584	C>T	UCEC	25205581	25205587	-	hsa-miR-1271-5p	KRAS	UTR3	1	530	0.001886792
12	25205584	C>T	UCEC	25205581	25205586	-	hsa-miR-182-5p	KRAS	UTR3	1	530	0.001886792
12	25205584	C>T	UCEC	25205581	25205587	-	hsa-miR-96-5p	KRAS	UTR3	1	530	0.001886792
12	25205653	C>G	UCEC	25205653	25205681	-	hsa-miR-3163	KRAS	UTR3	1	530	0.001886792
12	25206242	T>G	UCEC	25206236	25206264	-	hsa-miR-340-5p	KRAS	UTR3	1	530	0.001886792
12	25206242	T>G	UCEC	25206237	25206265	-	hsa-miR-3163	KRAS	UTR3	1	530	0.001886792
12	25206243	T>G	UCEC	25206236	25206264	-	hsa-miR-340-5p	KRAS	UTR3	1	530	0.001886792
12	25206243	T>G	UCEC	25206237	25206265	-	hsa-miR-3163	KRAS	UTR3	1	530	0.001886792
12	25206440	C>T	UCEC	25206437	25206443	-	hsa-miR-6509-5p	KRAS	UTR3	1	530	0.001886792
12	25206440	C>T	UCEC	25206412	25206440	-	hsa-miR-129-5p	KRAS	UTR3	1	530	0.001886792
12	25206504	G>A	UCEC	25206479	25206507	-	hsa-miR-520d-5p	KRAS	UTR3	1	530	0.001886792
12	25206504	G>A	UCEC	25206479	25206507	-	hsa-miR-524-5p	KRAS	UTR3	1	530	0.001886792
12	25208141	A>G	UCEC	25208137	25208142	-	hsa-miR-3924	KRAS	UTR3	1	530	0.001886792
12	25208215	T>G	UCEC	25208214	25208219	-	hsa-miR-522-3p	KRAS	UTR3	1	530	0.001886792
12	25208371	T>C	UCEC	25208366	25208394	-	hsa-miR-541-5p	KRAS	UTR3	1	530	0.001886792
12	25208459	C>A	UCEC	25208457	25208463	-	hsa-miR-146b-5p	KRAS	UTR3	1	530	0.001886792
12	25208459	C>A	UCEC	25208457	25208463	-	hsa-miR-146a-5p	KRAS	UTR3	1	530	0.001886792
12	25208459	C>A	UCEC	25208457	25208462	-	hsa-miR-589-5p	KRAS	UTR3	1	530	0.001886792
12	25208588	C>A	UCEC	25208584	25208612	-	hsa-miR-1276	KRAS	UTR3	2	530	0.003773585
12	25209663	C>T	UCEC	25209640	25209668	-	hsa-miR-664b-3p	KRAS	UTR3	1	530	0.001886792
12	25209682	G>A	UCEC	25209666	25209694	-	hsa-miR-4429	KRAS	UTR3	1	530	0.001886792
12	25209682	G>A	UCEC	25209677	25209682	-	hsa-miR-346	KRAS	UTR3	1	530	0.001886792
12	25209742	T>C	UCEC	25209739	25209744	-	hsa-miR-493-5p	KRAS	UTR3	1	530	0.001886792
12	25209742	T>C	UCEC	25209741	25209746	-	hsa-miR-524-5p	KRAS	UTR3	1	530	0.001886792
12	25209742	T>C	UCEC	25209741	25209746	-	hsa-miR-520d-5p	KRAS	UTR3	1	530	0.001886792
12	25209743	->T	UCEC	25209739	25209744	-	hsa-miR-493-5p	KRAS	UTR3	1	530	0.001886792
12	25209743	->T	UCEC	25209741	25209746	-	hsa-miR-524-5p	KRAS	UTR3	1	530	0.001886792
12	25209743	->T	UCEC	25209741	25209746	-	hsa-miR-520d-5p	KRAS	UTR3	1	530	0.001886792
12	26338457	C>T	UCEC	26338455	26338462	-	hsa-miR-545-3p	ITPR2	UTR3	1	530	0.001886792
12	284498	C>T	UCEC	284495	284501	-	hsa-miR-320b	KDM5A	UTR3	1	530	0.001886792
12	284498	C>T	UCEC	284495	284501	-	hsa-miR-320c	KDM5A	UTR3	1	530	0.001886792
12	284498	C>T	UCEC	284495	284500	-	hsa-miR-320a	KDM5A	UTR3	1	530	0.001886792
12	284498	C>T	UCEC	284495	284501	-	hsa-miR-320d	KDM5A	UTR3	1	530	0.001886792
12	284498	C>T	UCEC	284495	284500	-	hsa-miR-4429	KDM5A	UTR3	1	530	0.001886792
12	285252	C>A	UCEC	285252	285280	-	hsa-miR-641	KDM5A	UTR3	1	530	0.001886792
12	285252	C>A	UCEC	285248	285276	-	hsa-miR-186-5p	KDM5A	UTR3	1	530	0.001886792
12	285252	C>A	UCEC	285252	285280	-	hsa-miR-3617-5p	KDM5A	UTR3	1	530	0.001886792
12	285296	G>A	UCEC	285285	285313	-	hsa-miR-411-3p	KDM5A	UTR3	1	530	0.001886792
12	285296	G>A	UCEC	285285	285313	-	hsa-miR-379-3p	KDM5A	UTR3	1	530	0.001886792
12	49019477	T>G	UCEC	49019472	49019477	-	hsa-miR-340-5p	KMT2D	UTR3	1	530	0.001886792
12	49019477	T>G	UCEC	49019472	49019500	-	hsa-miR-3163	KMT2D	UTR3	1	530	0.001886792
12	49019478	T>G	UCEC	49019472	49019500	-	hsa-miR-3163	KMT2D	UTR3	1	530	0.001886792
12	49019487	G>T	UCEC	49019472	49019500	-	hsa-miR-3163	KMT2D	UTR3	1	530	0.001886792
12	49019554	G>A	UCEC	49019551	49019556	-	hsa-miR-324-3p	KMT2D	UTR3	2	530	0.003773585
12	49019554	G>A	UCEC	49019551	49019556	-	hsa-miR-1913	KMT2D	UTR3	2	530	0.003773585
12	49019554	G>A	UCEC	49019549	49019555	-	hsa-miR-346	KMT2D	UTR3	2	530	0.003773585
12	49019912	G>A	UCEC	49019910	49019916	-	hsa-miR-1247-5p	KMT2D	UTR3	1	530	0.001886792
12	49020611	G>-	UCEC	49020610	49020615	-	hsa-miR-4640-3p	KMT2D	UTR3	1	530	0.001886792
12	49020611	G>-	UCEC	49020611	49020616	-	hsa-miR-361-3p	KMT2D	UTR3	1	530	0.001886792
12	49021413	C>T	UCEC	49021409	49021414	-	hsa-miR-3918	KMT2D	UTR3	1	530	0.001886792
12	49021413	C>T	UCEC	49021388	49021416	-	hsa-miR-4306	KMT2D	UTR3	1	530	0.001886792
12	78211097	A>G	UCEC	78211093	78211098	+	hsa-miR-942-5p	NAV3	UTR3	1	530	0.001886792
12	78211097	A>G	UCEC	78211069	78211097	+	hsa-miR-519e-5p	NAV3	UTR3	1	530	0.001886792
12	78211192	A>G	UCEC	78211181	78211209	+	hsa-miR-299-5p	NAV3	UTR3	1	530	0.001886792
12	78211756	T>A	UCEC	78211753	78211781	+	hsa-miR-4703-5p	NAV3	UTR3	2	530	0.003773585
12	78211756	T>G	UCEC	78211753	78211781	+	hsa-miR-4703-5p	NAV3	UTR3	2	530	0.003773585
12	78211779	C>A	UCEC	78211753	78211781	+	hsa-miR-4703-5p	NAV3	UTR3	1	530	0.001886792
12	78211779	C>A	UCEC	78211775	78211781	+	hsa-miR-4766-3p	NAV3	UTR3	1	530	0.001886792
12	78212746	C>T	UCEC	78212729	78212757	+	hsa-miR-1277-5p	NAV3	UTR3	1	530	0.001886792
12	78212746	C>T	UCEC	78212726	78212754	+	hsa-miR-3163	NAV3	UTR3	1	530	0.001886792
12	78212936	->T	UCEC	78212911	78212939	+	hsa-miR-1277-5p	NAV3	UTR3	2	530	0.003773585
12	88049065	A>G	UCEC	88049064	88049087	-	hsa-miR-340-5p	CEP290	UTR3	1	530	0.001886792
12	88049065	T>C	UCEC	88049060	88049065	+	hsa-miR-374c-3p	C12orf29	UTR3	1	530	0.001886792
12	88049421	G>C	UCEC	88049416	88049421	+	hsa-miR-885-5p	C12orf29	UTR3	1	530	0.001886792
13	23328926	C>A	UCEC	23328909	23328937	-	hsa-miR-4703-5p	SACS	UTR3	1	530	0.001886792
13	23328926	C>A	UCEC	23328913	23328941	-	hsa-miR-3163	SACS	UTR3	1	530	0.001886792
13	23328926	C>A	UCEC	23328909	23328937	-	hsa-miR-3942-5p	SACS	UTR3	1	530	0.001886792
13	23328960	T>G	UCEC	23328948	23328976	-	hsa-miR-3163	SACS	UTR3	1	530	0.001886792
13	23329195	A>C	UCEC	23329194	23329199	-	hsa-miR-129-5p	SACS	UTR3	1	530	0.001886792
13	23329196	A>G	UCEC	23329194	23329199	-	hsa-miR-129-5p	SACS	UTR3	1	530	0.001886792
13	23329244	C>A	UCEC	23329241	23329246	-	hsa-miR-186-5p	SACS	UTR3	1	530	0.001886792
13	23329244	C>A	UCEC	23329239	23329244	-	hsa-miR-488-3p	SACS	UTR3	1	530	0.001886792
13	23329296	T>C	UCEC	23329282	23329310	-	hsa-miR-5688	SACS	UTR3	1	530	0.001886792
13	23329296	T>C	UCEC	23329291	23329296	-	hsa-miR-367-3p	SACS	UTR3	1	530	0.001886792
13	23329296	T>C	UCEC	23329294	23329299	-	hsa-miR-324-5p	SACS	UTR3	1	530	0.001886792
13	23329296	T>C	UCEC	23329291	23329296	-	hsa-miR-92b-3p	SACS	UTR3	1	530	0.001886792
13	23329296	T>C	UCEC	23329291	23329296	-	hsa-miR-363-3p	SACS	UTR3	1	530	0.001886792
13	23329296	T>C	UCEC	23329291	23329296	-	hsa-miR-25-3p	SACS	UTR3	1	530	0.001886792
13	23329296	T>C	UCEC	23329291	23329296	-	hsa-miR-32-5p	SACS	UTR3	1	530	0.001886792
13	23329296	T>C	UCEC	23329291	23329296	-	hsa-miR-92a-3p	SACS	UTR3	1	530	0.001886792
13	23329642	T>C	UCEC	23329626	23329654	-	hsa-miR-3163	SACS	UTR3	1	530	0.001886792
13	23329642	T>C	UCEC	23329636	23329664	-	hsa-miR-5688	SACS	UTR3	1	530	0.001886792
13	23329642	T>C	UCEC	23329637	23329642	-	hsa-miR-495-3p	SACS	UTR3	1	530	0.001886792
13	23329656	G>A	UCEC	23329636	23329664	-	hsa-miR-5688	SACS	UTR3	1	530	0.001886792
13	23329695	->T	UCEC	23329683	23329711	-	hsa-miR-3605-5p	SACS	UTR3	1	530	0.001886792
13	23329696	T>-	UCEC	23329683	23329711	-	hsa-miR-3605-5p	SACS	UTR3	2	530	0.003773585
13	23329775	T>-	UCEC	23329751	23329779	-	hsa-miR-5195-3p	SACS	UTR3	1	530	0.001886792
13	23329921	A>C	UCEC	23329920	23329925	-	hsa-miR-450b-5p	SACS	UTR3	1	530	0.001886792
13	23330079	C>T	UCEC	23330077	23330105	-	hsa-miR-4703-5p	SACS	UTR3	2	530	0.003773585
13	23330079	C>T	UCEC	23330077	23330082	-	hsa-miR-545-3p	SACS	UTR3	2	530	0.003773585
13	23330079	C>T	UCEC	23330077	23330105	-	hsa-miR-3942-5p	SACS	UTR3	2	530	0.003773585
13	23330079	C>A	UCEC	23330077	23330105	-	hsa-miR-4703-5p	SACS	UTR3	2	530	0.003773585
13	23330079	C>A	UCEC	23330077	23330082	-	hsa-miR-545-3p	SACS	UTR3	2	530	0.003773585
13	23330079	C>A	UCEC	23330077	23330105	-	hsa-miR-3942-5p	SACS	UTR3	2	530	0.003773585
13	23330084	A>C	UCEC	23330077	23330105	-	hsa-miR-4703-5p	SACS	UTR3	1	530	0.001886792
13	23330084	A>C	UCEC	23330077	23330105	-	hsa-miR-3942-5p	SACS	UTR3	1	530	0.001886792
13	23330089	G>A	UCEC	23330088	23330093	-	hsa-miR-517c-3p	SACS	UTR3	2	530	0.003773585
13	23330089	G>A	UCEC	23330077	23330105	-	hsa-miR-4703-5p	SACS	UTR3	2	530	0.003773585
13	23330089	G>A	UCEC	23330077	23330105	-	hsa-miR-3942-5p	SACS	UTR3	2	530	0.003773585
13	23330089	G>A	UCEC	23330088	23330093	-	hsa-miR-517a-3p	SACS	UTR3	2	530	0.003773585
13	32517774	T>C	UCEC	32517773	32517778	-	hsa-miR-495-3p	N4BP2L2	UTR3	1	530	0.001886792
13	35671306	C>T	UCEC	35671279	35671307	+	hsa-miR-219a-2-3p	NBEA	UTR3	1	530	0.001886792
13	35671306	C>T	UCEC	35671291	35671319	+	hsa-miR-4761-5p	NBEA	UTR3	1	530	0.001886792
13	35671306	C>T	UCEC	35671292	35671320	+	hsa-miR-624-3p	NBEA	UTR3	1	530	0.001886792
13	35671310	G>T	UCEC	35671291	35671319	+	hsa-miR-4761-5p	NBEA	UTR3	1	530	0.001886792
13	35671310	G>T	UCEC	35671292	35671320	+	hsa-miR-624-3p	NBEA	UTR3	1	530	0.001886792
13	35671730	C>T	UCEC	35671727	35671733	+	hsa-miR-135b-5p	NBEA	UTR3	1	530	0.001886792
13	35671730	C>T	UCEC	35671727	35671733	+	hsa-miR-135a-5p	NBEA	UTR3	1	530	0.001886792
13	35671777	A>G	UCEC	35671762	35671790	+	hsa-miR-944	NBEA	UTR3	1	530	0.001886792
13	35672198	C>A	UCEC	35672192	35672198	+	hsa-miR-494-3p	NBEA	UTR3	1	530	0.001886792
13	35672198	C>A	UCEC	35672184	35672212	+	hsa-miR-1277-5p	NBEA	UTR3	1	530	0.001886792
13	35672211	T>G	UCEC	35672184	35672212	+	hsa-miR-1277-5p	NBEA	UTR3	1	530	0.001886792
13	35672252	G>T	UCEC	35672251	35672257	+	hsa-miR-129-1-3p	NBEA	UTR3	1	530	0.001886792
13	35672252	G>T	UCEC	35672238	35672266	+	hsa-miR-532-5p	NBEA	UTR3	1	530	0.001886792
13	35672252	G>T	UCEC	35672243	35672271	+	hsa-miR-194-5p	NBEA	UTR3	1	530	0.001886792
13	35672252	G>T	UCEC	35672251	35672256	+	hsa-miR-129-2-3p	NBEA	UTR3	1	530	0.001886792
13	35672345	C>A	UCEC	35672345	35672351	+	hsa-miR-520d-5p	NBEA	UTR3	1	530	0.001886792
13	35672345	C>A	UCEC	35672345	35672351	+	hsa-miR-524-5p	NBEA	UTR3	1	530	0.001886792
13	35672345	C>A	UCEC	35672343	35672348	+	hsa-miR-186-5p	NBEA	UTR3	1	530	0.001886792
13	35672345	C>A	UCEC	35672328	35672356	+	hsa-miR-323b-3p	NBEA	UTR3	1	530	0.001886792
13	35672627	A>G	UCEC	35672616	35672644	+	hsa-miR-5579-3p	NBEA	UTR3	1	530	0.001886792
13	35672648	A>G	UCEC	35672646	35672651	+	hsa-miR-409-5p	NBEA	UTR3	1	530	0.001886792
13	35672648	A>G	UCEC	35672633	35672661	+	hsa-miR-3163	NBEA	UTR3	1	530	0.001886792
13	66303510	C>T	UCEC	66303508	66303513	-	hsa-miR-599	PCDH9	UTR3	1	530	0.001886792
13	66303511	A>G	UCEC	66303508	66303513	-	hsa-miR-599	PCDH9	UTR3	1	530	0.001886792
13	66303989	C>A	UCEC	66303984	66303989	-	hsa-miR-488-3p	PCDH9	UTR3	1	530	0.001886792
13	66303989	C>A	UCEC	66303986	66303991	-	hsa-miR-186-5p	PCDH9	UTR3	1	530	0.001886792
13	66303989	C>A	UCEC	66303982	66304010	-	hsa-miR-4766-5p	PCDH9	UTR3	1	530	0.001886792
13	66303989	C>A	UCEC	66303989	66303994	-	hsa-miR-494-3p	PCDH9	UTR3	1	530	0.001886792
13	66304132	T>C	UCEC	66304128	66304150	-	hsa-miR-200c-3p	PCDH9	UTR3	1	530	0.001886792
13	66304132	T>C	UCEC	66304128	66304149	-	hsa-miR-429	PCDH9	UTR3	1	530	0.001886792
13	66304133	G>T	UCEC	66304128	66304150	-	hsa-miR-200c-3p	PCDH9	UTR3	1	530	0.001886792
13	66304133	G>T	UCEC	66304128	66304149	-	hsa-miR-429	PCDH9	UTR3	1	530	0.001886792
13	66304344	G>T	UCEC	66304316	66304344	-	hsa-miR-668-3p	PCDH9	UTR3	1	530	0.001886792
13	66304383	T>C	UCEC	66304377	66304383	-	hsa-miR-455-3p	PCDH9	UTR3	1	530	0.001886792
13	66304516	G>A	UCEC	66304504	66304532	-	hsa-miR-543	PCDH9	UTR3	1	530	0.001886792
13	66304537	A>C	UCEC	66304532	66304537	-	hsa-miR-520g-3p	PCDH9	UTR3	1	530	0.001886792
13	66304537	A>C	UCEC	66304532	66304537	-	hsa-miR-520h	PCDH9	UTR3	1	530	0.001886792
13	66304548	G>A	UCEC	66304545	66304550	-	hsa-miR-188-5p	PCDH9	UTR3	1	530	0.001886792
13	67225340	G>A	UCEC	67225332	67225341	-	hsa-miR-193a-3p	PCDH9	UTR3	1	530	0.001886792
13	67225340	G>A	UCEC	67225332	67225341	-	hsa-miR-193b-3p	PCDH9	UTR3	1	530	0.001886792
13	77044678	T>G	UCEC	77044662	77044690	-	hsa-miR-374a-3p	MYCBP2	UTR3	1	530	0.001886792
13	77044678	T>G	UCEC	77044672	77044700	-	hsa-miR-3163	MYCBP2	UTR3	1	530	0.001886792
13	77044703	A>G	UCEC	77044701	77044707	-	hsa-miR-493-5p	MYCBP2	UTR3	1	530	0.001886792
13	77044703	A>G	UCEC	77044703	77044709	-	hsa-miR-4262	MYCBP2	UTR3	1	530	0.001886792
13	77044730	C>A	UCEC	77044729	77044734	-	hsa-miR-577	MYCBP2	UTR3	1	530	0.001886792
13	77044837	G>C	UCEC	77044833	77044838	-	hsa-miR-1197	MYCBP2	UTR3	1	530	0.001886792
13	77044837	G>C	UCEC	77044832	77044838	-	hsa-miR-5000-3p	MYCBP2	UTR3	1	530	0.001886792
13	77044837	G>C	UCEC	77044832	77044838	-	hsa-miR-4436a	MYCBP2	UTR3	1	530	0.001886792
13	77045170	->T	UCEC	77045165	77045170	-	hsa-miR-375	MYCBP2	UTR3	1	530	0.001886792
13	77045170	->T	UCEC	77045160	77045188	-	hsa-miR-664b-3p	MYCBP2	UTR3	1	530	0.001886792
13	77045236	A>G	UCEC	77045236	77045264	-	hsa-miR-500b-5p	MYCBP2	UTR3	1	530	0.001886792
13	77045236	A>G	UCEC	77045219	77045247	-	hsa-miR-493-5p	MYCBP2	UTR3	1	530	0.001886792
14	104937970	A>G	UCEC	104937964	104937970	-	hsa-miR-380-3p	AHNAK2	UTR3	1	530	0.001886792
14	104937970	A>G	UCEC	104937969	104937974	-	hsa-miR-455-5p	AHNAK2	UTR3	1	530	0.001886792
14	104937970	A>G	UCEC	104937970	104937975	-	hsa-miR-218-5p	AHNAK2	UTR3	1	530	0.001886792
15	28111400	C>T	UCEC	28111395	28111400	-	hsa-miR-488-3p	HERC2	UTR3	1	530	0.001886792
15	28111539	A>G	UCEC	28111539	28111544	-	hsa-miR-580-3p	HERC2	UTR3	1	530	0.001886792
15	41767304	C>T	UCEC	41767302	41767307	+	hsa-miR-149-5p	MGA	UTR3	1	530	0.001886792
15	41768300	T>G	UCEC	41768298	41768303	+	hsa-miR-3163	MGA	UTR3	2	530	0.003773585
15	41768300	T>G	UCEC	41768298	41768305	+	hsa-miR-577	MGA	UTR3	2	530	0.003773585
15	41768453	G>T	UCEC	41768451	41768456	+	hsa-miR-216b-5p	MGA	UTR3	1	530	0.001886792
15	41768453	G>T	UCEC	41768450	41768456	+	hsa-miR-216a-5p	MGA	UTR3	1	530	0.001886792
15	41769746	C>A	UCEC	41769719	41769747	+	hsa-miR-3171	MGA	UTR3	1	530	0.001886792
15	41769800	C>A	UCEC	41769798	41769803	+	hsa-miR-186-5p	MGA	UTR3	1	530	0.001886792
15	54627209	T>-	UCEC	54627202	54627221	+	hsa-miR-1278	UNC13C	UTR3	1	530	0.001886792
15	54627221	C>A	UCEC	54627202	54627221	+	hsa-miR-1278	UNC13C	UTR3	1	530	0.001886792
15	54627552	G>T	UCEC	54627540	54627562	+	hsa-miR-217	UNC13C	UTR3	1	530	0.001886792
15	54627552	G>T	UCEC	54627544	54627565	+	hsa-miR-134-5p	UNC13C	UTR3	1	530	0.001886792
15	54627552	G>T	UCEC	54627532	54627560	+	hsa-miR-33b-5p	UNC13C	UTR3	1	530	0.001886792
15	54627552	G>T	UCEC	54627532	54627560	+	hsa-miR-33a-5p	UNC13C	UTR3	1	530	0.001886792
15	54627554	A>C	UCEC	54627540	54627562	+	hsa-miR-217	UNC13C	UTR3	1	530	0.001886792
15	54627554	A>C	UCEC	54627544	54627565	+	hsa-miR-134-5p	UNC13C	UTR3	1	530	0.001886792
15	54627554	A>C	UCEC	54627532	54627560	+	hsa-miR-33b-5p	UNC13C	UTR3	1	530	0.001886792
15	54627554	A>C	UCEC	54627532	54627560	+	hsa-miR-33a-5p	UNC13C	UTR3	1	530	0.001886792
15	54628548	G>T	UCEC	54628548	54628553	+	hsa-miR-377-3p	UNC13C	UTR3	1	530	0.001886792
15	55619525	A>G	UCEC	55619521	55619526	-	hsa-miR-3924	PRTG	UTR3	1	530	0.001886792
15	55619762	T>C	UCEC	55619734	55619762	-	hsa-miR-5688	PRTG	UTR3	1	530	0.001886792
15	55619952	C>T	UCEC	55619950	55619956	-	hsa-miR-761	PRTG	UTR3	1	530	0.001886792
15	55619952	C>T	UCEC	55619950	55619956	-	hsa-miR-3619-5p	PRTG	UTR3	1	530	0.001886792
15	55619952	C>T	UCEC	55619950	55619956	-	hsa-miR-214-3p	PRTG	UTR3	1	530	0.001886792
15	61854396	A>G	UCEC	61854395	61854400	-	hsa-miR-134-5p	VPS13C	UTR3	1	530	0.001886792
15	61854396	A>G	UCEC	61854395	61854401	-	hsa-miR-3164	VPS13C	UTR3	1	530	0.001886792
15	61854397	C>T	UCEC	61854395	61854400	-	hsa-miR-134-5p	VPS13C	UTR3	1	530	0.001886792
15	61854397	C>T	UCEC	61854395	61854401	-	hsa-miR-3164	VPS13C	UTR3	1	530	0.001886792
15	61854442	G>T	UCEC	61854441	61854456	-	hsa-miR-125b-5p	VPS13C	UTR3	1	530	0.001886792
15	61854442	G>T	UCEC	61854441	61854456	-	hsa-miR-125a-5p	VPS13C	UTR3	1	530	0.001886792
15	61867829	G>T	UCEC	61867817	61867838	-	hsa-miR-186-5p	VPS13C	UTR3	1	530	0.001886792
16	72783093	A>G	UCEC	72783088	72783093	-	hsa-miR-1179	ZFHX3	UTR3	1	530	0.001886792
16	72783172	A>-	UCEC	72783164	72783192	-	hsa-miR-5691	ZFHX3	UTR3	1	530	0.001886792
16	72783190	->A	UCEC	72783185	72783190	-	hsa-miR-129-5p	ZFHX3	UTR3	1	530	0.001886792
16	72783190	->A	UCEC	72783164	72783192	-	hsa-miR-5691	ZFHX3	UTR3	1	530	0.001886792
16	72784308	T>G	UCEC	72784303	72784309	-	hsa-miR-545-3p	ZFHX3	UTR3	1	530	0.001886792
16	72784488	->A	UCEC	72784460	72784488	-	hsa-miR-130a-5p	ZFHX3	UTR3	1	530	0.001886792
16	72784488	->A	UCEC	72784460	72784488	-	hsa-miR-23c	ZFHX3	UTR3	1	530	0.001886792
16	72784559	T>C	UCEC	72784532	72784560	-	hsa-miR-224-3p	ZFHX3	UTR3	1	530	0.001886792
16	72784907	G>A	UCEC	72784895	72784923	-	hsa-miR-3163	ZFHX3	UTR3	1	530	0.001886792
16	72784950	A>C	UCEC	72784949	72784954	-	hsa-miR-432-5p	ZFHX3	UTR3	1	530	0.001886792
16	72785577	->A	UCEC	72785574	72785579	-	hsa-miR-204-5p	ZFHX3	UTR3	1	530	0.001886792
16	72785577	->A	UCEC	72785574	72785579	-	hsa-miR-211-5p	ZFHX3	UTR3	1	530	0.001886792
16	72786910	C>T	UCEC	72786909	72786915	-	hsa-miR-1197	ZFHX3	UTR3	1	530	0.001886792
16	72786910	C>T	UCEC	72786896	72786924	-	hsa-miR-624-5p	ZFHX3	UTR3	1	530	0.001886792
17	30894932	C>T	UCEC	30894932	30894938	+	hsa-miR-524-5p	ATAD5	UTR3	1	530	0.001886792
17	30894932	C>T	UCEC	30894932	30894938	+	hsa-miR-520d-5p	ATAD5	UTR3	1	530	0.001886792
17	30894932	C>T	UCEC	30894930	30894936	+	hsa-miR-330-3p	ATAD5	UTR3	1	530	0.001886792
17	30895026	A>G	UCEC	30895019	30895047	+	hsa-miR-3163	ATAD5	UTR3	1	530	0.001886792
18	45847788	A>G	UCEC	45847788	45847793	-	hsa-miR-377-3p	EPG5	UTR3	1	530	0.001886792
18	45847788	A>G	UCEC	45847765	45847793	-	hsa-miR-5590-3p	EPG5	UTR3	1	530	0.001886792
18	45847973	C>A	UCEC	45847973	45847978	-	hsa-miR-1185-5p	EPG5	UTR3	1	530	0.001886792
18	45847973	C>A	UCEC	45847973	45847978	-	hsa-miR-3605-5p	EPG5	UTR3	1	530	0.001886792
18	45847973	C>A	UCEC	45847970	45847975	-	hsa-miR-1276	EPG5	UTR3	1	530	0.001886792
18	45847973	C>A	UCEC	45847973	45847978	-	hsa-miR-3679-5p	EPG5	UTR3	1	530	0.001886792
18	45850644	C>A	UCEC	45850640	45850645	-	hsa-miR-132-3p	EPG5	UTR3	1	530	0.001886792
18	45850644	C>A	UCEC	45850640	45850645	-	hsa-miR-212-3p	EPG5	UTR3	1	530	0.001886792
18	45850644	C>A	UCEC	45850623	45850651	-	hsa-miR-374b-5p	EPG5	UTR3	1	530	0.001886792
18	45850777	A>C	UCEC	45850775	45850780	-	hsa-miR-944	EPG5	UTR3	1	530	0.001886792
18	45852311	T>G	UCEC	45852310	45852315	-	hsa-miR-944	EPG5	UTR3	1	530	0.001886792
18	45852406	G>A	UCEC	45852403	45852408	-	hsa-miR-19b-3p	EPG5	UTR3	1	530	0.001886792
18	45852406	G>A	UCEC	45852403	45852408	-	hsa-miR-19a-3p	EPG5	UTR3	1	530	0.001886792
18	45852442	C>T	UCEC	45852441	45852446	-	hsa-miR-629-5p	EPG5	UTR3	1	530	0.001886792
1	113761849	A>-	UCEC	113761834	113761862	-	hsa-miR-1197	RSBN1	UTR3	1	530	0.001886792
1	113761851	A>C	UCEC	113761834	113761862	-	hsa-miR-1197	RSBN1	UTR3	1	530	0.001886792
1	113761953	->T	UCEC	113761949	113761954	-	hsa-miR-221-3p	RSBN1	UTR3	1	530	0.001886792
1	113761953	->T	UCEC	113761951	113761956	-	hsa-miR-524-5p	RSBN1	UTR3	1	530	0.001886792
1	113761953	->T	UCEC	113761949	113761954	-	hsa-miR-222-3p	RSBN1	UTR3	1	530	0.001886792
1	113761953	->T	UCEC	113761951	113761956	-	hsa-miR-520d-5p	RSBN1	UTR3	1	530	0.001886792
1	113762139	T>-	UCEC	113762124	113762152	-	hsa-miR-3163	RSBN1	UTR3	2	530	0.003773585
1	113762311	A>C	UCEC	113762301	113762329	-	hsa-miR-5009-3p	RSBN1	UTR3	1	530	0.001886792
1	113762339	A>C	UCEC	113762320	113762348	-	hsa-miR-224-3p	RSBN1	UTR3	1	530	0.001886792
1	113762339	A>C	UCEC	113762334	113762339	-	hsa-miR-889-3p	RSBN1	UTR3	1	530	0.001886792
1	113762399	G>A	UCEC	113762377	113762405	-	hsa-miR-3617-5p	RSBN1	UTR3	1	530	0.001886792
1	113762399	G>A	UCEC	113762382	113762410	-	hsa-miR-541-5p	RSBN1	UTR3	1	530	0.001886792
1	113762693	G>T	UCEC	113762691	113762696	-	hsa-miR-431-5p	RSBN1	UTR3	1	530	0.001886792
1	113762697	A>C	UCEC	113762694	113762699	-	hsa-miR-375	RSBN1	UTR3	1	530	0.001886792
1	113762697	A>C	UCEC	113762697	113762702	-	hsa-miR-384	RSBN1	UTR3	1	530	0.001886792
1	113762723	T>C	UCEC	113762705	113762733	-	hsa-miR-5579-3p	RSBN1	UTR3	1	530	0.001886792
1	113762837	G>T	UCEC	113762817	113762845	-	hsa-miR-5009-3p	RSBN1	UTR3	1	530	0.001886792
1	113763176	G>A	UCEC	113763175	113763180	-	hsa-miR-3140-3p	RSBN1	UTR3	1	530	0.001886792
1	113765624	C>T	UCEC	113765605	113765633	-	hsa-miR-3163	RSBN1	UTR3	1	530	0.001886792
1	113765624	C>T	UCEC	113765621	113765626	-	hsa-miR-183-5p	RSBN1	UTR3	1	530	0.001886792
1	113765624	C>T	UCEC	113765623	113765628	-	hsa-miR-31-5p	RSBN1	UTR3	1	530	0.001886792
1	113765648	A>G	UCEC	113765640	113765668	-	hsa-miR-3163	RSBN1	UTR3	1	530	0.001886792
1	113765973	C>T	UCEC	113765972	113765978	-	hsa-miR-493-5p	RSBN1	UTR3	1	530	0.001886792
1	149032232	C>T	UCEC	149032230	149032236	-	hsa-miR-512-3p	PDE4DIP	UTR3	1	530	0.001886792
1	149032232	C>T	UCEC	149032228	149032233	-	hsa-miR-4731-5p	PDE4DIP	UTR3	1	530	0.001886792
1	149032232	C>T	UCEC	149032231	149032236	-	hsa-miR-520f-3p	PDE4DIP	UTR3	1	530	0.001886792
1	155335355	A>G	UCEC	155335355	155335361	-	hsa-miR-655-3p	ASH1L	UTR3	1	530	0.001886792
1	155335355	A>G	UCEC	155335355	155335361	-	hsa-miR-374c-5p	ASH1L	UTR3	1	530	0.001886792
1	155335702	C>A	UCEC	155335699	155335704	-	hsa-miR-186-5p	ASH1L	UTR3	1	530	0.001886792
1	155335752	A>G	UCEC	155335752	155335758	-	hsa-miR-520d-5p	ASH1L	UTR3	1	530	0.001886792
1	155335752	A>G	UCEC	155335752	155335758	-	hsa-miR-524-5p	ASH1L	UTR3	1	530	0.001886792
1	155335849	C>T	UCEC	155335849	155335855	-	hsa-miR-3140-3p	ASH1L	UTR3	1	530	0.001886792
1	155335928	C>A	UCEC	155335925	155335930	-	hsa-miR-186-5p	ASH1L	UTR3	1	530	0.001886792
1	155336114	C>T	UCEC	155336112	155336117	-	hsa-miR-182-5p	ASH1L	UTR3	1	530	0.001886792
1	155336114	C>T	UCEC	155336112	155336117	-	hsa-miR-96-5p	ASH1L	UTR3	1	530	0.001886792
1	155336114	C>T	UCEC	155336099	155336127	-	hsa-miR-561-5p	ASH1L	UTR3	1	530	0.001886792
1	155336114	C>T	UCEC	155336112	155336117	-	hsa-miR-1271-5p	ASH1L	UTR3	1	530	0.001886792
1	155336115	C>A	UCEC	155336112	155336117	-	hsa-miR-182-5p	ASH1L	UTR3	1	530	0.001886792
1	155336115	C>A	UCEC	155336112	155336117	-	hsa-miR-96-5p	ASH1L	UTR3	1	530	0.001886792
1	155336115	C>A	UCEC	155336099	155336127	-	hsa-miR-561-5p	ASH1L	UTR3	1	530	0.001886792
1	155336115	C>A	UCEC	155336115	155336121	-	hsa-miR-324-5p	ASH1L	UTR3	1	530	0.001886792
1	155336115	C>A	UCEC	155336112	155336117	-	hsa-miR-1271-5p	ASH1L	UTR3	1	530	0.001886792
1	155336494	C>A	UCEC	155336492	155336497	-	hsa-miR-641	ASH1L	UTR3	1	530	0.001886792
1	155336511	T>G	UCEC	155336499	155336520	-	hsa-miR-320b	ASH1L	UTR3	1	530	0.001886792
1	155336511	T>G	UCEC	155336499	155336518	-	hsa-miR-320c	ASH1L	UTR3	1	530	0.001886792
1	155336511	T>G	UCEC	155336499	155336520	-	hsa-miR-320a	ASH1L	UTR3	1	530	0.001886792
1	155336511	T>G	UCEC	155336499	155336517	-	hsa-miR-320d	ASH1L	UTR3	1	530	0.001886792
1	155336511	T>G	UCEC	155336502	155336530	-	hsa-miR-3140-3p	ASH1L	UTR3	1	530	0.001886792
1	155337540	A>G	UCEC	155337540	155337545	-	hsa-miR-328-3p	ASH1L	UTR3	1	530	0.001886792
1	180111216	C>T	UCEC	180111213	180111218	+	hsa-miR-34b-5p	CEP350	UTR3	1	530	0.001886792
1	180111216	C>T	UCEC	180111213	180111218	+	hsa-miR-449c-5p	CEP350	UTR3	1	530	0.001886792
1	180111216	C>T	UCEC	180111213	180111218	+	hsa-miR-2682-5p	CEP350	UTR3	1	530	0.001886792
1	180111216	C>T	UCEC	180111214	180111220	+	hsa-miR-3612	CEP350	UTR3	1	530	0.001886792
1	180111216	C>T	UCEC	180111214	180111220	+	hsa-miR-650	CEP350	UTR3	1	530	0.001886792
1	180111257	C>T	UCEC	180111256	180111261	+	hsa-miR-520a-5p	CEP350	UTR3	1	530	0.001886792
1	180111257	C>T	UCEC	180111256	180111261	+	hsa-miR-525-5p	CEP350	UTR3	1	530	0.001886792
1	180111486	C>A	UCEC	180111484	180111489	+	hsa-miR-186-5p	CEP350	UTR3	1	530	0.001886792
1	180111680	C>A	UCEC	180111678	180111683	+	hsa-miR-186-5p	CEP350	UTR3	1	530	0.001886792
1	180111680	C>A	UCEC	180111669	180111697	+	hsa-miR-224-3p	CEP350	UTR3	1	530	0.001886792
1	180111680	C>A	UCEC	180111675	180111703	+	hsa-miR-7-5p	CEP350	UTR3	1	530	0.001886792
1	180111698	C>A	UCEC	180111675	180111703	+	hsa-miR-7-5p	CEP350	UTR3	1	530	0.001886792
1	180112422	C>A	UCEC	180112422	180112427	+	hsa-miR-34b-5p	CEP350	UTR3	1	530	0.001886792
1	180112422	C>A	UCEC	180112422	180112427	+	hsa-miR-449c-5p	CEP350	UTR3	1	530	0.001886792
1	180112422	C>A	UCEC	180112422	180112427	+	hsa-miR-2682-5p	CEP350	UTR3	1	530	0.001886792
1	180112422	C>A	UCEC	180112420	180112425	+	hsa-miR-2467-3p	CEP350	UTR3	1	530	0.001886792
1	180113755	C>T	UCEC	180113734	180113762	+	hsa-miR-5688	CEP350	UTR3	1	530	0.001886792
1	180114195	A>-	UCEC	180114189	180114217	+	hsa-miR-4429	CEP350	UTR3	1	530	0.001886792
1	180114419	A>G	UCEC	180114415	180114420	+	hsa-miR-30a-5p	CEP350	UTR3	1	530	0.001886792
1	180114419	A>G	UCEC	180114414	180114420	+	hsa-miR-30e-5p	CEP350	UTR3	1	530	0.001886792
1	180114419	A>G	UCEC	180114415	180114420	+	hsa-miR-30c-5p	CEP350	UTR3	1	530	0.001886792
1	180114419	A>G	UCEC	180114415	180114420	+	hsa-miR-30b-5p	CEP350	UTR3	1	530	0.001886792
1	180114419	A>G	UCEC	180114415	180114420	+	hsa-miR-30d-5p	CEP350	UTR3	1	530	0.001886792
1	180114558	C>T	UCEC	180114557	180114562	+	hsa-miR-520g-3p	CEP350	UTR3	1	530	0.001886792
1	180114558	C>T	UCEC	180114557	180114562	+	hsa-miR-520h	CEP350	UTR3	1	530	0.001886792
1	180114725	T>C	UCEC	180114719	180114725	+	hsa-miR-32-5p	CEP350	UTR3	1	530	0.001886792
1	180114725	T>C	UCEC	180114718	180114725	+	hsa-miR-25-3p	CEP350	UTR3	1	530	0.001886792
1	180114725	T>C	UCEC	180114718	180114725	+	hsa-miR-92a-3p	CEP350	UTR3	1	530	0.001886792
1	180114725	T>C	UCEC	180114718	180114725	+	hsa-miR-92b-3p	CEP350	UTR3	1	530	0.001886792
1	180114725	T>C	UCEC	180114718	180114725	+	hsa-miR-367-3p	CEP350	UTR3	1	530	0.001886792
1	180114725	T>C	UCEC	180114719	180114725	+	hsa-miR-363-3p	CEP350	UTR3	1	530	0.001886792
1	180114762	C>T	UCEC	180114759	180114765	+	hsa-miR-487b-3p	CEP350	UTR3	1	530	0.001886792
1	180114849	C>A	UCEC	180114837	180114865	+	hsa-miR-5094	CEP350	UTR3	1	530	0.001886792
1	186189913	C>T	UCEC	186189908	186189913	+	hsa-miR-299-5p	HMCN1	UTR3	2	530	0.003773585
1	186189914	G>A	UCEC	186189914	186189919	+	hsa-miR-155-5p	HMCN1	UTR3	2	530	0.003773585
1	186189964	G>A	UCEC	186189960	186189965	+	hsa-miR-452-5p	HMCN1	UTR3	1	530	0.001886792
1	197084237	C>T	UCEC	197084232	197084238	-	hsa-miR-382-5p	ASPM	UTR3	1	530	0.001886792
1	197084237	C>T	UCEC	197084217	197084237	-	hsa-miR-224-5p	ASPM	UTR3	1	530	0.001886792
1	197084237	C>T	UCEC	197084234	197084240	-	hsa-miR-3613-5p	ASPM	UTR3	1	530	0.001886792
1	224967818	A>T	UCEC	224967818	224967823	+	hsa-miR-520g-3p	DNAH14	UTR3	1	530	0.001886792
1	224967818	A>T	UCEC	224967818	224967823	+	hsa-miR-520h	DNAH14	UTR3	1	530	0.001886792
1	237833058	G>T	UCEC	237833048	237833072	+	hsa-miR-373-3p	RYR2	UTR3	1	530	0.001886792
1	237833058	G>T	UCEC	237833049	237833072	+	hsa-miR-302d-3p	RYR2	UTR3	1	530	0.001886792
1	237833058	G>T	UCEC	237833047	237833072	+	hsa-miR-520a-3p	RYR2	UTR3	1	530	0.001886792
1	237833058	G>T	UCEC	237833047	237833067	+	hsa-miR-139-5p	RYR2	UTR3	1	530	0.001886792
1	237833058	G>T	UCEC	237833049	237833072	+	hsa-miR-520d-3p	RYR2	UTR3	1	530	0.001886792
1	237833058	G>T	UCEC	237833049	237833072	+	hsa-miR-372-3p	RYR2	UTR3	1	530	0.001886792
1	237833058	G>T	UCEC	237833048	237833072	+	hsa-miR-520e	RYR2	UTR3	1	530	0.001886792
1	246839682	C>T	UCEC	246839656	246839684	-	hsa-miR-130a-5p	AHCTF1	UTR3	1	530	0.001886792
1	246839750	T>C	UCEC	246839749	246839754	-	hsa-miR-340-5p	AHCTF1	UTR3	1	530	0.001886792
1	246839753	T>G	UCEC	246839753	246839759	-	hsa-miR-944	AHCTF1	UTR3	1	530	0.001886792
1	246839753	T>G	UCEC	246839749	246839754	-	hsa-miR-340-5p	AHCTF1	UTR3	1	530	0.001886792
1	246839753	T>G	UCEC	246839753	246839781	-	hsa-miR-126-5p	AHCTF1	UTR3	1	530	0.001886792
1	246839845	C>T	UCEC	246839843	246839848	-	hsa-miR-585-3p	AHCTF1	UTR3	1	530	0.001886792
1	246840174	C>A	UCEC	246840171	246840178	-	hsa-miR-1276	AHCTF1	UTR3	1	530	0.001886792
1	246840174	C>A	UCEC	246840174	246840179	-	hsa-miR-2114-3p	AHCTF1	UTR3	1	530	0.001886792
1	246840286	C>A	UCEC	246840285	246840290	-	hsa-miR-489-3p	AHCTF1	UTR3	1	530	0.001886792
1	246840286	C>A	UCEC	246840284	246840289	-	hsa-miR-425-5p	AHCTF1	UTR3	1	530	0.001886792
1	246840439	C>A	UCEC	246840436	246840442	-	hsa-miR-499a-5p	AHCTF1	UTR3	1	530	0.001886792
1	246840439	C>A	UCEC	246840436	246840441	-	hsa-miR-208a-3p	AHCTF1	UTR3	1	530	0.001886792
1	246840439	C>A	UCEC	246840436	246840441	-	hsa-miR-208b-3p	AHCTF1	UTR3	1	530	0.001886792
1	246840481	T>A	UCEC	246840478	246840483	-	hsa-miR-556-5p	AHCTF1	UTR3	1	530	0.001886792
1	26780951	T>G	UCEC	26780947	26780952	+	hsa-miR-524-3p	ARID1A	UTR3	1	530	0.001886792
1	26780951	T>G	UCEC	26780947	26780952	+	hsa-miR-525-3p	ARID1A	UTR3	1	530	0.001886792
1	26781025	A>G	UCEC	26780997	26781025	+	hsa-miR-2682-5p	ARID1A	UTR3	1	530	0.001886792
1	26781025	A>G	UCEC	26780997	26781025	+	hsa-miR-34b-5p	ARID1A	UTR3	1	530	0.001886792
1	26781025	A>G	UCEC	26780997	26781025	+	hsa-miR-449c-5p	ARID1A	UTR3	1	530	0.001886792
1	26781082	->A	UCEC	26781078	26781084	+	hsa-miR-2355-5p	ARID1A	UTR3	1	530	0.001886792
1	26781227	T>G	UCEC	26781225	26781230	+	hsa-miR-140-3p	ARID1A	UTR3	1	530	0.001886792
1	26781227	T>G	UCEC	26781222	26781227	+	hsa-miR-362-3p	ARID1A	UTR3	1	530	0.001886792
1	26781227	T>G	UCEC	26781222	26781227	+	hsa-miR-329-3p	ARID1A	UTR3	1	530	0.001886792
1	26781437	G>A	UCEC	26781434	26781439	+	hsa-miR-543	ARID1A	UTR3	1	530	0.001886792
1	26781566	G>C	UCEC	26781563	26781568	+	hsa-miR-576-5p	ARID1A	UTR3	1	530	0.001886792
1	26781611	G>A	UCEC	26781607	26781612	+	hsa-miR-362-3p	ARID1A	UTR3	1	530	0.001886792
1	26781611	G>A	UCEC	26781607	26781612	+	hsa-miR-329-3p	ARID1A	UTR3	1	530	0.001886792
1	26781745	C>T	UCEC	26781743	26781748	+	hsa-miR-335-5p	ARID1A	UTR3	1	530	0.001886792
1	26781745	C>T	UCEC	26781745	26781750	+	hsa-miR-31-5p	ARID1A	UTR3	1	530	0.001886792
1	26781818	A>G	UCEC	26781816	26781821	+	hsa-miR-509-3p	ARID1A	UTR3	1	530	0.001886792
1	26781825	T>G	UCEC	26781821	26781826	+	hsa-miR-382-5p	ARID1A	UTR3	1	530	0.001886792
1	26782027	A>T	UCEC	26782027	26782033	+	hsa-miR-3145-3p	ARID1A	UTR3	1	530	0.001886792
1	39486053	A>G	UCEC	39486048	39486053	+	hsa-miR-192-5p	MACF1	UTR3	1	530	0.001886792
1	39486053	A>G	UCEC	39486051	39486056	+	hsa-miR-526b-5p	MACF1	UTR3	1	530	0.001886792
1	39486053	A>G	UCEC	39486048	39486053	+	hsa-miR-215-5p	MACF1	UTR3	1	530	0.001886792
1	39486173	A>G	UCEC	39486168	39486173	+	hsa-miR-26b-5p	MACF1	UTR3	1	530	0.001886792
1	39486173	A>G	UCEC	39486168	39486173	+	hsa-miR-1297	MACF1	UTR3	1	530	0.001886792
1	39486173	A>G	UCEC	39486171	39486176	+	hsa-miR-224-5p	MACF1	UTR3	1	530	0.001886792
1	39486173	A>G	UCEC	39486168	39486173	+	hsa-miR-26a-5p	MACF1	UTR3	1	530	0.001886792
1	39486243	T>G	UCEC	39486242	39486247	+	hsa-miR-520d-5p	MACF1	UTR3	1	530	0.001886792
1	39486243	T>G	UCEC	39486242	39486247	+	hsa-miR-524-5p	MACF1	UTR3	1	530	0.001886792
1	43450788	C>T	UCEC	43450782	43450789	+	hsa-miR-147a	SZT2	UTR3	1	530	0.001886792
1	43450788	C>T	UCEC	43450787	43450793	+	hsa-miR-10a-5p	SZT2	UTR3	1	530	0.001886792
1	43450788	C>T	UCEC	43450787	43450792	+	hsa-miR-339-5p	SZT2	UTR3	1	530	0.001886792
1	43450788	C>T	UCEC	43450787	43450793	+	hsa-miR-10b-5p	SZT2	UTR3	1	530	0.001886792
1	43450856	C>T	UCEC	43450848	43450876	+	hsa-miR-24-3p	SZT2	UTR3	1	530	0.001886792
1	43451123	G>A	UCEC	43451119	43451125	+	hsa-miR-642b-3p	SZT2	UTR3	1	530	0.001886792
1	43451123	G>A	UCEC	43451119	43451125	+	hsa-miR-642a-3p	SZT2	UTR3	1	530	0.001886792
1	43451216	G>A	UCEC	43451211	43451217	-	hsa-miR-3612	HYI	UTR3	1	530	0.001886792
1	43451216	G>A	UCEC	43451213	43451219	-	hsa-miR-3622a-5p	HYI	UTR3	1	530	0.001886792
1	43451216	G>A	UCEC	43451211	43451217	-	hsa-miR-650	HYI	UTR3	1	530	0.001886792
1	43451892	G>T	UCEC	43451885	43451906	+	hsa-miR-211-5p	SZT2	UTR3	1	530	0.001886792
1	43451892	G>T	UCEC	43451885	43451906	+	hsa-miR-204-5p	SZT2	UTR3	1	530	0.001886792
1	6105179	G>T	UCEC	6105177	6105182	-	hsa-miR-576-5p	CHD5	UTR3	1	530	0.001886792
1	62455295	G>A	UCEC	62455285	62455313	-	hsa-miR-3187-3p	DOCK7	UTR3	1	530	0.001886792
1	62455295	G>A	UCEC	62455293	62455298	-	hsa-miR-33a-5p	DOCK7	UTR3	1	530	0.001886792
1	62455295	G>A	UCEC	62455285	62455313	-	hsa-miR-4701-5p	DOCK7	UTR3	1	530	0.001886792
1	62455295	G>A	UCEC	62455285	62455313	-	hsa-miR-588	DOCK7	UTR3	1	530	0.001886792
1	62455295	G>A	UCEC	62455293	62455298	-	hsa-miR-33b-5p	DOCK7	UTR3	1	530	0.001886792
1	62455295	G>A	UCEC	62455275	62455303	-	hsa-miR-3145-3p	DOCK7	UTR3	1	530	0.001886792
1	62455295	G>A	UCEC	62455291	62455297	-	hsa-miR-217	DOCK7	UTR3	1	530	0.001886792
1	62455299	G>T	UCEC	62455285	62455313	-	hsa-miR-3187-3p	DOCK7	UTR3	1	530	0.001886792
1	62455299	G>T	UCEC	62455285	62455313	-	hsa-miR-588	DOCK7	UTR3	1	530	0.001886792
1	62455299	G>T	UCEC	62455275	62455303	-	hsa-miR-3145-3p	DOCK7	UTR3	1	530	0.001886792
1	62455299	G>T	UCEC	62455285	62455313	-	hsa-miR-4701-5p	DOCK7	UTR3	1	530	0.001886792
21	36293691	G>A	UCEC	36293674	36293702	+	hsa-miR-4766-5p	DOPEY2	UTR3	1	530	0.001886792
22	40323454	A>C	UCEC	40323452	40323457	+	hsa-miR-129-5p	TNRC6B	UTR3	1	530	0.001886792
22	40323630	->A	UCEC	40323629	40323657	+	hsa-miR-5688	TNRC6B	UTR3	1	530	0.001886792
22	40323724	T>G	UCEC	40323724	40323729	+	hsa-miR-361-3p	TNRC6B	UTR3	1	530	0.001886792
22	40324702	C>T	UCEC	40324688	40324716	+	hsa-miR-5688	TNRC6B	UTR3	1	530	0.001886792
22	40324785	G>A	UCEC	40324784	40324789	+	hsa-miR-200c-3p	TNRC6B	UTR3	1	530	0.001886792
22	40324785	G>A	UCEC	40324784	40324789	+	hsa-miR-200b-3p	TNRC6B	UTR3	1	530	0.001886792
22	40324785	G>A	UCEC	40324784	40324789	+	hsa-miR-429	TNRC6B	UTR3	1	530	0.001886792
22	40325207	G>A	UCEC	40325204	40325209	+	hsa-miR-211-5p	TNRC6B	UTR3	1	530	0.001886792
22	40325207	G>A	UCEC	40325204	40325209	+	hsa-miR-204-5p	TNRC6B	UTR3	1	530	0.001886792
22	40325812	C>A	UCEC	40325787	40325815	+	hsa-miR-761	TNRC6B	UTR3	1	530	0.001886792
22	40325812	C>A	UCEC	40325809	40325814	+	hsa-miR-214-3p	TNRC6B	UTR3	1	530	0.001886792
22	40326119	T>G	UCEC	40326110	40326138	+	hsa-miR-409-3p	TNRC6B	UTR3	1	530	0.001886792
22	40326168	C>A	UCEC	40326164	40326171	+	hsa-miR-580-3p	TNRC6B	UTR3	1	530	0.001886792
22	40326168	C>A	UCEC	40326167	40326195	+	hsa-miR-3064-5p	TNRC6B	UTR3	1	530	0.001886792
22	40326248	C>A	UCEC	40326246	40326251	+	hsa-miR-186-5p	TNRC6B	UTR3	1	530	0.001886792
22	40326248	C>A	UCEC	40326243	40326248	+	hsa-miR-494-3p	TNRC6B	UTR3	1	530	0.001886792
22	40326365	C>T	UCEC	40326361	40326366	+	hsa-miR-147a	TNRC6B	UTR3	2	530	0.003773585
22	40326483	C>A	UCEC	40326480	40326486	+	hsa-miR-186-5p	TNRC6B	UTR3	1	530	0.001886792
22	40326844	G>A	UCEC	40326823	40326851	+	hsa-miR-5688	TNRC6B	UTR3	1	530	0.001886792
22	40326844	G>A	UCEC	40326826	40326854	+	hsa-miR-1323	TNRC6B	UTR3	1	530	0.001886792
22	40326844	G>A	UCEC	40326830	40326858	+	hsa-miR-150-5p	TNRC6B	UTR3	1	530	0.001886792
22	40326844	G>A	UCEC	40326830	40326858	+	hsa-miR-532-3p	TNRC6B	UTR3	1	530	0.001886792
22	40326844	G>A	UCEC	40326823	40326851	+	hsa-miR-495-3p	TNRC6B	UTR3	1	530	0.001886792
22	40326844	G>A	UCEC	40326826	40326854	+	hsa-miR-548o-3p	TNRC6B	UTR3	1	530	0.001886792
22	40326844	G>A	UCEC	40326830	40326858	+	hsa-miR-2116-3p	TNRC6B	UTR3	1	530	0.001886792
22	40326917	G>A	UCEC	40326913	40326918	+	hsa-miR-4731-5p	TNRC6B	UTR3	1	530	0.001886792
22	40326947	T>G	UCEC	40326933	40326961	+	hsa-miR-761	TNRC6B	UTR3	1	530	0.001886792
22	40326947	T>G	UCEC	40326944	40326949	+	hsa-miR-1323	TNRC6B	UTR3	1	530	0.001886792
22	40326947	T>G	UCEC	40326944	40326949	+	hsa-miR-548o-3p	TNRC6B	UTR3	1	530	0.001886792
22	40327099	G>T	UCEC	40327099	40327104	+	hsa-miR-671-5p	TNRC6B	UTR3	1	530	0.001886792
22	40327099	G>T	UCEC	40327096	40327101	+	hsa-miR-590-5p	TNRC6B	UTR3	1	530	0.001886792
22	40327099	G>T	UCEC	40327096	40327101	+	hsa-miR-21-5p	TNRC6B	UTR3	1	530	0.001886792
22	40327400	C>T	UCEC	40327376	40327404	+	hsa-miR-1252-5p	TNRC6B	UTR3	1	530	0.001886792
22	40328828	A>C	UCEC	40328820	40328848	+	hsa-miR-4429	TNRC6B	UTR3	1	530	0.001886792
22	40328828	A>C	UCEC	40328821	40328849	+	hsa-miR-9-3p	TNRC6B	UTR3	1	530	0.001886792
22	40330892	A>C	UCEC	40330892	40330898	+	hsa-miR-216b-5p	TNRC6B	UTR3	1	530	0.001886792
22	40331010	T>A	UCEC	40331001	40331029	+	hsa-miR-330-3p	TNRC6B	UTR3	1	530	0.001886792
22	40331010	T>A	UCEC	40331010	40331038	+	hsa-miR-1323	TNRC6B	UTR3	1	530	0.001886792
22	40331010	T>A	UCEC	40331010	40331038	+	hsa-miR-548o-3p	TNRC6B	UTR3	1	530	0.001886792
22	40331037	->T	UCEC	40331019	40331040	+	hsa-miR-5688	TNRC6B	UTR3	1	530	0.001886792
22	40331037	->T	UCEC	40331019	40331040	+	hsa-miR-495-3p	TNRC6B	UTR3	1	530	0.001886792
22	40331037	->T	UCEC	40331010	40331038	+	hsa-miR-1323	TNRC6B	UTR3	1	530	0.001886792
22	40331037	->T	UCEC	40331010	40331038	+	hsa-miR-548o-3p	TNRC6B	UTR3	1	530	0.001886792
22	40331215	G>A	UCEC	40331198	40331226	+	hsa-miR-421	TNRC6B	UTR3	1	530	0.001886792
22	40331702	C>T	UCEC	40331683	40331711	+	hsa-miR-186-5p	TNRC6B	UTR3	1	530	0.001886792
22	40331705	T>G	UCEC	40331683	40331711	+	hsa-miR-186-5p	TNRC6B	UTR3	1	530	0.001886792
22	40331787	C>T	UCEC	40331771	40331799	+	hsa-miR-541-5p	TNRC6B	UTR3	1	530	0.001886792
22	40332417	C>A	UCEC	40332396	40332424	+	hsa-miR-5688	TNRC6B	UTR3	1	530	0.001886792
22	40332432	C>T	UCEC	40332431	40332437	+	hsa-miR-513a-5p	TNRC6B	UTR3	1	530	0.001886792
22	40332432	C>T	UCEC	40332432	40332437	+	hsa-miR-27b-3p	TNRC6B	UTR3	1	530	0.001886792
22	40332432	C>T	UCEC	40332426	40332432	+	hsa-miR-31-5p	TNRC6B	UTR3	1	530	0.001886792
22	40332432	C>T	UCEC	40332432	40332437	+	hsa-miR-27a-3p	TNRC6B	UTR3	1	530	0.001886792
22	40332591	C>T	UCEC	40332588	40332593	+	hsa-miR-4677-3p	TNRC6B	UTR3	1	530	0.001886792
22	40332591	C>T	UCEC	40332591	40332597	+	hsa-miR-873-3p	TNRC6B	UTR3	1	530	0.001886792
22	40332793	A>G	UCEC	40332771	40332799	+	hsa-miR-541-5p	TNRC6B	UTR3	1	530	0.001886792
22	40332847	C>A	UCEC	40332845	40332850	+	hsa-miR-186-5p	TNRC6B	UTR3	1	530	0.001886792
22	40333374	A>C	UCEC	40333372	40333377	+	hsa-miR-129-5p	TNRC6B	UTR3	1	530	0.001886792
22	40333403	T>G	UCEC	40333401	40333406	+	hsa-miR-7-5p	TNRC6B	UTR3	1	530	0.001886792
22	40333450	C>T	UCEC	40333446	40333451	+	hsa-miR-7-5p	TNRC6B	UTR3	1	530	0.001886792
22	40333450	C>T	UCEC	40333449	40333454	+	hsa-miR-1287-5p	TNRC6B	UTR3	1	530	0.001886792
22	40334059	G>A	UCEC	40334050	40334078	+	hsa-miR-5688	TNRC6B	UTR3	1	530	0.001886792
22	40334747	G>T	UCEC	40334744	40334750	+	hsa-miR-942-5p	TNRC6B	UTR3	1	530	0.001886792
22	40335057	G>A	UCEC	40335054	40335059	+	hsa-miR-487b-3p	TNRC6B	UTR3	1	530	0.001886792
22	40335057	G>A	UCEC	40335056	40335063	+	hsa-miR-889-3p	TNRC6B	UTR3	1	530	0.001886792
22	40335155	G>A	UCEC	40335154	40335159	+	hsa-miR-365a-3p	TNRC6B	UTR3	1	530	0.001886792
22	40335155	G>A	UCEC	40335154	40335159	+	hsa-miR-365b-3p	TNRC6B	UTR3	1	530	0.001886792
22	40335504	->A	UCEC	40335504	40335509	+	hsa-miR-129-5p	TNRC6B	UTR3	1	530	0.001886792
2	106405071	G>A	UCEC	106405065	106405086	-	hsa-miR-329-3p	RGPD3	UTR3	1	530	0.001886792
2	106405071	G>A	UCEC	106405065	106405086	-	hsa-miR-362-3p	RGPD3	UTR3	1	530	0.001886792
2	106405071	G>A	UCEC	106405071	106405091	-	hsa-miR-129-5p	RGPD3	UTR3	1	530	0.001886792
2	106405072	A>-	UCEC	106405065	106405086	-	hsa-miR-329-3p	RGPD3	UTR3	1	530	0.001886792
2	106405072	A>-	UCEC	106405065	106405086	-	hsa-miR-362-3p	RGPD3	UTR3	1	530	0.001886792
2	106405072	A>-	UCEC	106405071	106405091	-	hsa-miR-129-5p	RGPD3	UTR3	1	530	0.001886792
2	106405086	T>G	UCEC	106405065	106405086	-	hsa-miR-329-3p	RGPD3	UTR3	1	530	0.001886792
2	106405086	T>G	UCEC	106405065	106405086	-	hsa-miR-362-3p	RGPD3	UTR3	1	530	0.001886792
2	106405086	T>G	UCEC	106405071	106405091	-	hsa-miR-129-5p	RGPD3	UTR3	1	530	0.001886792
2	106405121	C>A	UCEC	106405115	106405143	-	hsa-miR-3121-3p	RGPD3	UTR3	1	530	0.001886792
2	108783984	G>A	UCEC	108783982	108783988	+	hsa-miR-320c	RANBP2	UTR3	1	530	0.001886792
2	108783984	G>A	UCEC	108783982	108783988	+	hsa-miR-320b	RANBP2	UTR3	1	530	0.001886792
2	108783984	G>A	UCEC	108783982	108783988	+	hsa-miR-320a	RANBP2	UTR3	1	530	0.001886792
2	108783984	G>A	UCEC	108783982	108783988	+	hsa-miR-4429	RANBP2	UTR3	1	530	0.001886792
2	108783984	G>A	UCEC	108783982	108783988	+	hsa-miR-320d	RANBP2	UTR3	1	530	0.001886792
2	108784139	G>A	UCEC	108784139	108784144	+	hsa-miR-655-3p	RANBP2	UTR3	1	530	0.001886792
2	108784139	G>A	UCEC	108784139	108784145	+	hsa-miR-374c-5p	RANBP2	UTR3	1	530	0.001886792
2	108784200	T>C	UCEC	108784200	108784206	+	hsa-miR-154-3p	RANBP2	UTR3	1	530	0.001886792
2	108784200	T>C	UCEC	108784200	108784205	+	hsa-miR-487a-3p	RANBP2	UTR3	1	530	0.001886792
2	108784411	G>T	UCEC	108784405	108784411	+	hsa-miR-9-5p	RANBP2	UTR3	1	530	0.001886792
2	108784497	C>A	UCEC	108784496	108784501	+	hsa-miR-671-5p	RANBP2	UTR3	1	530	0.001886792
2	140231656	A>G	UCEC	140231646	140231674	-	hsa-miR-3142	LRP1B	UTR3	1	530	0.001886792
2	140231656	A>G	UCEC	140231656	140231678	-	hsa-miR-183-5p	LRP1B	UTR3	1	530	0.001886792
2	165390369	->T	UCEC	165390363	165390391	+	hsa-miR-107	SCN2A	UTR3	1	530	0.001886792
2	165390369	->T	UCEC	165390344	165390372	+	hsa-miR-1277-5p	SCN2A	UTR3	1	530	0.001886792
2	165390369	->T	UCEC	165390360	165390382	+	hsa-miR-136-5p	SCN2A	UTR3	1	530	0.001886792
2	165390369	->T	UCEC	165390363	165390391	+	hsa-miR-103a-3p	SCN2A	UTR3	1	530	0.001886792
2	165390552	A>G	UCEC	165390550	165390555	+	hsa-miR-758-3p	SCN2A	UTR3	1	530	0.001886792
2	165390552	A>G	UCEC	165390548	165390576	+	hsa-miR-3163	SCN2A	UTR3	1	530	0.001886792
2	165391021	T>C	UCEC	165391018	165391046	+	hsa-miR-656-3p	SCN2A	UTR3	1	530	0.001886792
2	165391021	T>C	UCEC	165391017	165391045	+	hsa-miR-556-3p	SCN2A	UTR3	1	530	0.001886792
2	165391021	T>C	UCEC	165391007	165391035	+	hsa-miR-488-3p	SCN2A	UTR3	1	530	0.001886792
2	165391021	T>C	UCEC	165391013	165391038	+	hsa-miR-653-5p	SCN2A	UTR3	1	530	0.001886792
2	165391028	G>A	UCEC	165391018	165391046	+	hsa-miR-656-3p	SCN2A	UTR3	1	530	0.001886792
2	165391028	G>A	UCEC	165391017	165391045	+	hsa-miR-556-3p	SCN2A	UTR3	1	530	0.001886792
2	165391028	G>A	UCEC	165391007	165391035	+	hsa-miR-488-3p	SCN2A	UTR3	1	530	0.001886792
2	165391028	G>A	UCEC	165391013	165391038	+	hsa-miR-653-5p	SCN2A	UTR3	1	530	0.001886792
2	165391043	T>C	UCEC	165391018	165391046	+	hsa-miR-656-3p	SCN2A	UTR3	1	530	0.001886792
2	165391043	T>C	UCEC	165391017	165391045	+	hsa-miR-556-3p	SCN2A	UTR3	1	530	0.001886792
2	165391389	T>C	UCEC	165391371	165391394	+	hsa-miR-3163	SCN2A	UTR3	1	530	0.001886792
2	165391549	T>-	UCEC	165391529	165391557	+	hsa-miR-3163	SCN2A	UTR3	1	530	0.001886792
2	215360874	T>G	UCEC	215360869	215360874	-	hsa-miR-380-3p	FN1	UTR3	1	530	0.001886792
2	215361042	T>C	UCEC	215361042	215361049	-	hsa-miR-552-3p	FN1	UTR3	1	530	0.001886792
2	215361063	G>T	UCEC	215361055	215361083	-	hsa-miR-3145-3p	FN1	UTR3	1	530	0.001886792
2	215361146	T>C	UCEC	215361144	215361150	-	hsa-miR-139-5p	FN1	UTR3	1	530	0.001886792
2	215361146	T>C	UCEC	215361141	215361146	-	hsa-miR-384	FN1	UTR3	1	530	0.001886792
2	215361146	T>C	UCEC	215361146	215361151	-	hsa-miR-101-3p	FN1	UTR3	1	530	0.001886792
2	215361146	T>C	UCEC	215361145	215361150	-	hsa-miR-582-5p	FN1	UTR3	1	530	0.001886792
2	215361146	T>C	UCEC	215361146	215361152	-	hsa-miR-144-3p	FN1	UTR3	1	530	0.001886792
2	215361380	T>C	UCEC	215361354	215361382	-	hsa-miR-664b-3p	FN1	UTR3	1	530	0.001886792
2	32618059	T>A	UCEC	32618056	32618061	+	hsa-miR-3163	BIRC6	UTR3	1	530	0.001886792
2	32618199	G>T	UCEC	32618199	32618204	+	hsa-miR-181c-5p	BIRC6	UTR3	1	530	0.001886792
2	32618199	G>T	UCEC	32618199	32618204	+	hsa-miR-181d-5p	BIRC6	UTR3	1	530	0.001886792
2	32618199	G>T	UCEC	32618199	32618204	+	hsa-miR-181b-5p	BIRC6	UTR3	1	530	0.001886792
2	32618199	G>T	UCEC	32618199	32618204	+	hsa-miR-181a-5p	BIRC6	UTR3	1	530	0.001886792
2	32618199	G>T	UCEC	32618199	32618205	+	hsa-miR-543	BIRC6	UTR3	1	530	0.001886792
2	32618199	G>T	UCEC	32618199	32618204	+	hsa-miR-4262	BIRC6	UTR3	1	530	0.001886792
2	32618517	T>C	UCEC	32618517	32618523	+	hsa-miR-653-5p	BIRC6	UTR3	1	530	0.001886792
2	32618517	T>C	UCEC	32618511	32618517	+	hsa-miR-380-3p	BIRC6	UTR3	1	530	0.001886792
2	32618533	T>G	UCEC	32618530	32618536	+	hsa-miR-3163	BIRC6	UTR3	1	530	0.001886792
2	60457828	T>-	UCEC	60457806	60457834	-	hsa-miR-448	BCL11A	UTR3	1	530	0.001886792
2	60458250	T>G	UCEC	60458245	60458266	-	hsa-miR-374a-5p	BCL11A	UTR3	1	530	0.001886792
2	60458250	T>G	UCEC	60458245	60458266	-	hsa-miR-374b-5p	BCL11A	UTR3	1	530	0.001886792
2	60458250	T>G	UCEC	60458244	60458264	-	hsa-miR-410-3p	BCL11A	UTR3	1	530	0.001886792
2	60458259	G>T	UCEC	60458245	60458266	-	hsa-miR-374a-5p	BCL11A	UTR3	1	530	0.001886792
2	60458259	G>T	UCEC	60458245	60458266	-	hsa-miR-374b-5p	BCL11A	UTR3	1	530	0.001886792
2	60458259	G>T	UCEC	60458244	60458264	-	hsa-miR-410-3p	BCL11A	UTR3	1	530	0.001886792
2	60458744	C>A	UCEC	60458744	60458749	-	hsa-miR-299-5p	BCL11A	UTR3	1	530	0.001886792
2	60458760	T>C	UCEC	60458756	60458761	-	hsa-miR-888-5p	BCL11A	UTR3	1	530	0.001886792
2	60459192	C>T	UCEC	60459189	60459194	-	hsa-miR-584-5p	BCL11A	UTR3	1	530	0.001886792
2	60459248	G>A	UCEC	60459247	60459252	-	hsa-miR-516b-5p	BCL11A	UTR3	1	530	0.001886792
2	60459288	T>C	UCEC	60459286	60459291	-	hsa-miR-323a-3p	BCL11A	UTR3	1	530	0.001886792
2	60459288	T>C	UCEC	60459283	60459289	-	hsa-miR-641	BCL11A	UTR3	1	530	0.001886792
2	60459576	A>G	UCEC	60459571	60459576	-	hsa-miR-944	BCL11A	UTR3	1	530	0.001886792
2	60459654	C>A	UCEC	60459642	60459670	-	hsa-miR-186-5p	BCL11A	UTR3	1	530	0.001886792
2	60459812	A>-	UCEC	60459802	60459823	-	hsa-miR-376b-3p	BCL11A	UTR3	2	530	0.003773585
2	60459812	A>-	UCEC	60459802	60459822	-	hsa-miR-376a-3p	BCL11A	UTR3	2	530	0.003773585
3	121664345	C>T	UCEC	121664331	121664359	-	hsa-miR-1306-5p	GOLGB1	UTR3	1	530	0.001886792
3	121664345	C>T	UCEC	121664342	121664347	-	hsa-miR-450b-5p	GOLGB1	UTR3	1	530	0.001886792
3	121664345	C>T	UCEC	121664340	121664346	-	hsa-miR-129-5p	GOLGB1	UTR3	1	530	0.001886792
3	121664458	C>T	UCEC	121664454	121664459	-	hsa-miR-140-5p	GOLGB1	UTR3	1	530	0.001886792
3	151433043	G>A	UCEC	151433023	151433051	+	hsa-miR-1245b-5p	MED12L	UTR3	1	530	0.001886792
3	151433248	C>A	UCEC	151433220	151433248	+	hsa-miR-3200-5p	MED12L	UTR3	2	530	0.003773585
3	151433473	C>A	UCEC	151433471	151433476	+	hsa-miR-186-5p	MED12L	UTR3	1	530	0.001886792
4	113381702	A>G	UCEC	113381698	113381703	+	hsa-miR-4766-5p	ANK2	UTR3	1	530	0.001886792
4	113382078	G>A	UCEC	113382067	113382091	+	hsa-miR-199a-5p	ANK2	UTR3	1	530	0.001886792
4	113382078	G>A	UCEC	113382067	113382091	+	hsa-miR-199b-5p	ANK2	UTR3	1	530	0.001886792
4	113382143	T>G	UCEC	113382141	113382147	+	hsa-miR-4703-5p	ANK2	UTR3	1	530	0.001886792
4	113382143	T>G	UCEC	113382121	113382149	+	hsa-miR-4766-3p	ANK2	UTR3	1	530	0.001886792
4	113382143	T>G	UCEC	113382141	113382147	+	hsa-miR-3942-5p	ANK2	UTR3	1	530	0.001886792
4	113383229	T>G	UCEC	113383224	113383229	+	hsa-miR-302a-3p	ANK2	UTR3	1	530	0.001886792
4	113383229	T>G	UCEC	113383224	113383229	+	hsa-miR-302c-3p	ANK2	UTR3	1	530	0.001886792
4	113383229	T>G	UCEC	113383224	113383229	+	hsa-miR-520b	ANK2	UTR3	1	530	0.001886792
4	113383229	T>G	UCEC	113383224	113383229	+	hsa-miR-519a-3p	ANK2	UTR3	1	530	0.001886792
4	113383229	T>G	UCEC	113383224	113383229	+	hsa-miR-520a-3p	ANK2	UTR3	1	530	0.001886792
4	113383229	T>G	UCEC	113383224	113383229	+	hsa-miR-519c-3p	ANK2	UTR3	1	530	0.001886792
4	113383229	T>G	UCEC	113383224	113383229	+	hsa-miR-302b-3p	ANK2	UTR3	1	530	0.001886792
4	113383229	T>G	UCEC	113383224	113383229	+	hsa-miR-302d-3p	ANK2	UTR3	1	530	0.001886792
4	113383229	T>G	UCEC	113383224	113383229	+	hsa-miR-519b-3p	ANK2	UTR3	1	530	0.001886792
4	113383229	T>G	UCEC	113383224	113383229	+	hsa-miR-520c-3p	ANK2	UTR3	1	530	0.001886792
4	113383229	T>G	UCEC	113383224	113383229	+	hsa-miR-520e	ANK2	UTR3	1	530	0.001886792
4	113383229	T>G	UCEC	113383224	113383229	+	hsa-miR-373-3p	ANK2	UTR3	1	530	0.001886792
4	113383229	T>G	UCEC	113383224	113383229	+	hsa-miR-302e	ANK2	UTR3	1	530	0.001886792
4	113383229	T>G	UCEC	113383224	113383229	+	hsa-miR-372-3p	ANK2	UTR3	1	530	0.001886792
4	113383229	T>G	UCEC	113383224	113383229	+	hsa-miR-520d-3p	ANK2	UTR3	1	530	0.001886792
4	113383250	C>G	UCEC	113383231	113383254	+	hsa-miR-182-5p	ANK2	UTR3	1	530	0.001886792
4	113383661	A>G	UCEC	113383660	113383666	+	hsa-miR-3613-5p	ANK2	UTR3	1	530	0.001886792
4	113383661	A>G	UCEC	113383652	113383680	+	hsa-miR-3924	ANK2	UTR3	1	530	0.001886792
4	150264674	C>A	UCEC	150264659	150264687	-	hsa-miR-513b-5p	LRBA	UTR3	2	530	0.003773585
4	150264674	C>A	UCEC	150264670	150264690	-	hsa-miR-186-5p	LRBA	UTR3	2	530	0.003773585
4	150264674	C>A	UCEC	150264667	150264695	-	hsa-miR-524-5p	LRBA	UTR3	2	530	0.003773585
4	150264674	C>A	UCEC	150264667	150264695	-	hsa-miR-520d-5p	LRBA	UTR3	2	530	0.003773585
4	150264695	C>T	UCEC	150264693	150264699	-	hsa-miR-3142	LRBA	UTR3	1	530	0.001886792
4	150264695	C>T	UCEC	150264693	150264699	-	hsa-miR-1245b-5p	LRBA	UTR3	1	530	0.001886792
4	150264695	C>T	UCEC	150264667	150264695	-	hsa-miR-524-5p	LRBA	UTR3	1	530	0.001886792
4	150264695	C>T	UCEC	150264667	150264695	-	hsa-miR-520d-5p	LRBA	UTR3	1	530	0.001886792
4	150264697	G>A	UCEC	150264693	150264699	-	hsa-miR-3142	LRBA	UTR3	1	530	0.001886792
4	150264697	G>A	UCEC	150264693	150264699	-	hsa-miR-1245b-5p	LRBA	UTR3	1	530	0.001886792
4	150264719	C>A	UCEC	150264713	150264733	-	hsa-miR-27b-3p	LRBA	UTR3	1	530	0.001886792
4	150264719	C>A	UCEC	150264714	150264719	-	hsa-miR-513a-5p	LRBA	UTR3	1	530	0.001886792
4	150264719	C>A	UCEC	150264713	150264733	-	hsa-miR-27a-3p	LRBA	UTR3	1	530	0.001886792
4	150264933	C>T	UCEC	150264912	150264940	-	hsa-miR-5688	LRBA	UTR3	1	530	0.001886792
4	150265039	C>T	UCEC	150265031	150265059	-	hsa-miR-664b-3p	LRBA	UTR3	1	530	0.001886792
4	150265199	C>A	UCEC	150265197	150265203	-	hsa-miR-499b-5p	LRBA	UTR3	2	530	0.003773585
4	150265199	C>T	UCEC	150265197	150265203	-	hsa-miR-499b-5p	LRBA	UTR3	2	530	0.003773585
4	150265529	C>A	UCEC	150265525	150265530	-	hsa-miR-503-5p	LRBA	UTR3	1	530	0.001886792
4	150265529	C>A	UCEC	150265525	150265530	-	hsa-miR-195-5p	LRBA	UTR3	1	530	0.001886792
4	150265529	C>A	UCEC	150265525	150265530	-	hsa-miR-16-5p	LRBA	UTR3	1	530	0.001886792
4	150265529	C>A	UCEC	150265525	150265530	-	hsa-miR-15b-5p	LRBA	UTR3	1	530	0.001886792
4	150265529	C>A	UCEC	150265525	150265530	-	hsa-miR-15a-5p	LRBA	UTR3	1	530	0.001886792
4	150265529	C>A	UCEC	150265525	150265530	-	hsa-miR-497-5p	LRBA	UTR3	1	530	0.001886792
4	150265529	C>A	UCEC	150265524	150265529	-	hsa-miR-214-3p	LRBA	UTR3	1	530	0.001886792
4	150265529	C>A	UCEC	150265525	150265530	-	hsa-miR-424-5p	LRBA	UTR3	1	530	0.001886792
4	150265581	T>A	UCEC	150265577	150265582	-	hsa-miR-524-5p	LRBA	UTR3	1	530	0.001886792
4	150265581	T>A	UCEC	150265577	150265582	-	hsa-miR-520d-5p	LRBA	UTR3	1	530	0.001886792
4	150265609	T>G	UCEC	150265585	150265613	-	hsa-miR-4703-5p	LRBA	UTR3	1	530	0.001886792
4	186587937	C>A	UCEC	186587937	186587943	-	hsa-miR-493-3p	FAT1	UTR3	1	530	0.001886792
4	186588001	A>G	UCEC	186587998	186588003	-	hsa-miR-380-3p	FAT1	UTR3	1	530	0.001886792
4	186588001	A>G	UCEC	186588001	186588029	-	hsa-miR-3617-5p	FAT1	UTR3	1	530	0.001886792
4	186588001	A>G	UCEC	186588001	186588006	-	hsa-miR-208a-3p	FAT1	UTR3	1	530	0.001886792
4	186588001	A>G	UCEC	186588001	186588006	-	hsa-miR-499a-5p	FAT1	UTR3	1	530	0.001886792
4	186588001	A>G	UCEC	186588001	186588006	-	hsa-miR-208b-3p	FAT1	UTR3	1	530	0.001886792
4	186588254	A>G	UCEC	186588246	186588274	-	hsa-miR-3163	FAT1	UTR3	1	530	0.001886792
4	186588258	T>-	UCEC	186588246	186588274	-	hsa-miR-3163	FAT1	UTR3	16	530	0.030188679
4	186588524	C>T	UCEC	186588499	186588527	-	hsa-miR-4429	FAT1	UTR3	1	530	0.001886792
4	186588524	C>T	UCEC	186588521	186588526	-	hsa-miR-186-5p	FAT1	UTR3	1	530	0.001886792
4	186588533	C>T	UCEC	186588529	186588534	-	hsa-miR-2277-5p	FAT1	UTR3	1	530	0.001886792
4	186588554	C>T	UCEC	186588549	186588554	-	hsa-miR-1251-5p	FAT1	UTR3	1	530	0.001886792
5	112844221	T>G	UCEC	112844221	112844226	+	hsa-miR-520d-5p	APC	UTR3	2	530	0.003773585
5	112844221	T>G	UCEC	112844221	112844226	+	hsa-miR-524-5p	APC	UTR3	2	530	0.003773585
5	112844318	C>A	READ	112844316	112844321	+	hsa-miR-335-5p	APC	UTR3	1	137	0.00729927
5	112844318	C>T	UCEC	112844316	112844321	+	hsa-miR-335-5p	APC	UTR3	1	530	0.001886792
5	112844418	C>A	UCEC	112844413	112844419	+	hsa-miR-4703-5p	APC	UTR3	1	530	0.001886792
5	112844418	C>A	UCEC	112844413	112844419	+	hsa-miR-3942-5p	APC	UTR3	1	530	0.001886792
5	112844504	->A	UCEC	112844503	112844508	+	hsa-miR-380-3p	APC	UTR3	1	530	0.001886792
5	112844621	A>G	UCEC	112844617	112844624	+	hsa-miR-375	APC	UTR3	1	530	0.001886792
5	112844826	T>A	UCEC	112844824	112844831	+	hsa-miR-577	APC	UTR3	1	530	0.001886792
5	177295747	T>C	UCEC	177295745	177295750	+	hsa-miR-1269a	NSD1	UTR3	1	530	0.001886792
5	177295779	C>T	UCEC	177295774	177295802	+	hsa-miR-3144-3p	NSD1	UTR3	1	530	0.001886792
5	177295779	C>T	UCEC	177295751	177295779	+	hsa-miR-219a-2-3p	NSD1	UTR3	1	530	0.001886792
5	177295929	T>C	UCEC	177295923	177295929	+	hsa-miR-941	NSD1	UTR3	1	530	0.001886792
5	177295929	T>C	UCEC	177295927	177295932	+	hsa-miR-29c-3p	NSD1	UTR3	1	530	0.001886792
5	177295929	T>C	UCEC	177295927	177295932	+	hsa-miR-29a-3p	NSD1	UTR3	1	530	0.001886792
5	177295929	T>C	UCEC	177295927	177295932	+	hsa-miR-29b-3p	NSD1	UTR3	1	530	0.001886792
5	68297669	C>A	UCEC	68297663	68297670	+	hsa-miR-28-5p	PIK3R1	UTR3	1	530	0.001886792
5	68297669	C>A	UCEC	68297669	68297675	+	hsa-miR-4306	PIK3R1	UTR3	1	530	0.001886792
5	68297669	C>A	UCEC	68297669	68297675	+	hsa-miR-4644	PIK3R1	UTR3	1	530	0.001886792
5	68297669	C>A	UCEC	68297669	68297674	+	hsa-miR-185-5p	PIK3R1	UTR3	1	530	0.001886792
5	68297669	C>A	UCEC	68297665	68297670	+	hsa-miR-708-5p	PIK3R1	UTR3	1	530	0.001886792
5	68297683	C>T	UCEC	68297683	68297688	+	hsa-miR-27b-3p	PIK3R1	UTR3	2	530	0.003773585
5	68297683	C>T	UCEC	68297683	68297688	+	hsa-miR-27a-3p	PIK3R1	UTR3	2	530	0.003773585
5	68297683	C>T	UCEC	68297677	68297683	+	hsa-miR-383-5p	PIK3R1	UTR3	2	530	0.003773585
5	68297683	C>T	UCEC	68297683	68297688	+	hsa-miR-513a-5p	PIK3R1	UTR3	2	530	0.003773585
5	68297683	C>A	UCEC	68297683	68297688	+	hsa-miR-27b-3p	PIK3R1	UTR3	2	530	0.003773585
5	68297683	C>A	UCEC	68297683	68297688	+	hsa-miR-27a-3p	PIK3R1	UTR3	2	530	0.003773585
5	68297683	C>A	UCEC	68297677	68297683	+	hsa-miR-383-5p	PIK3R1	UTR3	2	530	0.003773585
5	68297683	C>A	UCEC	68297683	68297688	+	hsa-miR-513a-5p	PIK3R1	UTR3	2	530	0.003773585
5	68297709	C>T	UCEC	68297706	68297712	+	hsa-miR-135b-5p	PIK3R1	UTR3	1	530	0.001886792
5	68297709	C>T	UCEC	68297706	68297712	+	hsa-miR-135a-5p	PIK3R1	UTR3	1	530	0.001886792
5	68297899	C>A	UCEC	68297899	68297904	+	hsa-miR-2467-3p	PIK3R1	UTR3	1	530	0.001886792
5	68298465	A>G	UCEC	68298462	68298468	+	hsa-miR-590-5p	PIK3R1	UTR3	1	530	0.001886792
5	68298465	A>G	UCEC	68298462	68298468	+	hsa-miR-21-5p	PIK3R1	UTR3	1	530	0.001886792
5	68298675	T>-	UCEC	68298668	68298696	+	hsa-miR-5688	PIK3R1	UTR3	3	530	0.005660377
5	68298692	TGTTGGGCA>-	UCEC	68298690	68298695	+	hsa-miR-495-3p	PIK3R1	UTR3	1	530	0.001886792
5	68298692	TGTTGGGCA>-	UCEC	68298688	68298693	+	hsa-miR-1323	PIK3R1	UTR3	1	530	0.001886792
5	68298692	TGTTGGGCA>-	UCEC	68298688	68298693	+	hsa-miR-548o-3p	PIK3R1	UTR3	1	530	0.001886792
5	68298692	TGTTGGGCA>-	UCEC	68298668	68298696	+	hsa-miR-5688	PIK3R1	UTR3	1	530	0.001886792
5	68298761	G>A	UCEC	68298753	68298781	+	hsa-miR-3942-5p	PIK3R1	UTR3	1	530	0.001886792
5	68301496	A>G	UCEC	68301494	68301499	+	hsa-miR-455-5p	PIK3R1	UTR3	1	530	0.001886792
5	68301496	A>G	UCEC	68301491	68301496	+	hsa-miR-153-3p	PIK3R1	UTR3	1	530	0.001886792
5	68301496	A>G	UCEC	68301490	68301496	+	hsa-miR-448	PIK3R1	UTR3	1	530	0.001886792
5	71565267	G>A	UCEC	71565266	71565294	+	hsa-miR-3163	BDP1	UTR3	1	530	0.001886792
5	71565267	G>A	UCEC	71565255	71565283	+	hsa-miR-513b-5p	BDP1	UTR3	1	530	0.001886792
5	71565274	C>A	UCEC	71565266	71565294	+	hsa-miR-3163	BDP1	UTR3	1	530	0.001886792
5	71565274	C>A	UCEC	71565255	71565283	+	hsa-miR-513b-5p	BDP1	UTR3	1	530	0.001886792
5	71565940	G>T	UCEC	71565938	71565943	+	hsa-miR-500b-5p	BDP1	UTR3	1	530	0.001886792
5	71565940	G>T	UCEC	71565934	71565962	+	hsa-miR-3121-3p	BDP1	UTR3	1	530	0.001886792
5	71565940	G>T	UCEC	71565938	71565943	+	hsa-miR-362-5p	BDP1	UTR3	1	530	0.001886792
5	71566011	->T	UCEC	71566007	71566013	+	hsa-miR-4428	BDP1	UTR3	1	530	0.001886792
5	71567575	C>T	UCEC	71567573	71567578	+	hsa-miR-208a-3p	BDP1	UTR3	1	530	0.001886792
5	71567575	C>T	UCEC	71567550	71567578	+	hsa-miR-641	BDP1	UTR3	1	530	0.001886792
5	71567575	C>T	UCEC	71567550	71567578	+	hsa-miR-3617-5p	BDP1	UTR3	1	530	0.001886792
5	71567575	C>T	UCEC	71567573	71567578	+	hsa-miR-499a-5p	BDP1	UTR3	1	530	0.001886792
5	71567575	C>T	UCEC	71567558	71567586	+	hsa-miR-3614-5p	BDP1	UTR3	1	530	0.001886792
5	71567737	T>C	UCEC	71567711	71567739	+	hsa-miR-3145-3p	BDP1	UTR3	1	530	0.001886792
5	71567757	C>A	UCEC	71567738	71567766	+	hsa-miR-5687	BDP1	UTR3	1	530	0.001886792
5	71567768	G>T	UCEC	71567762	71567782	+	hsa-miR-410-3p	BDP1	UTR3	1	530	0.001886792
5	72205282	A>G	UCEC	72205279	72205284	+	hsa-miR-516b-5p	MAP1B	UTR3	1	530	0.001886792
5	72205329	T>G	UCEC	72205326	72205332	+	hsa-miR-28-3p	MAP1B	UTR3	1	530	0.001886792
5	72206055	G>A	UCEC	72206055	72206061	+	hsa-miR-105-5p	MAP1B	UTR3	1	530	0.001886792
5	72206055	G>A	UCEC	72206051	72206056	+	hsa-miR-4731-5p	MAP1B	UTR3	1	530	0.001886792
5	72206307	G>A	UCEC	72206303	72206308	+	hsa-miR-361-3p	MAP1B	UTR3	1	530	0.001886792
5	72206362	G>T	UCEC	72206358	72206363	+	hsa-miR-421	MAP1B	UTR3	1	530	0.001886792
5	72206473	A>-	UCEC	72206453	72206481	+	hsa-miR-4676-3p	MAP1B	UTR3	1	530	0.001886792
5	79799705	->GAGTTCATTATAAATTTAAATC	UCEC	79799701	79799706	+	hsa-miR-129-5p	CMYA5	UTR3	1	530	0.001886792
5	79799707	->AGTTCATTATAAAT	UCEC	79799706	79799711	+	hsa-miR-873-3p	CMYA5	UTR3	1	530	0.001886792
6	144851121	C>T	UCEC	144851120	144851125	+	hsa-miR-128-3p	UTRN	UTR3	1	530	0.001886792
6	144851121	C>T	UCEC	144851119	144851147	+	hsa-miR-2681-5p	UTRN	UTR3	1	530	0.001886792
6	144851454	C>A	UCEC	144851452	144851457	+	hsa-miR-1276	UTRN	UTR3	1	530	0.001886792
6	144852482	C>A	UCEC	144852457	144852485	+	hsa-miR-4766-3p	UTRN	UTR3	1	530	0.001886792
6	144852662	C>A	UCEC	144852661	144852666	+	hsa-miR-518d-5p	UTRN	UTR3	1	530	0.001886792
6	144852662	C>A	UCEC	144852661	144852666	+	hsa-miR-526a	UTRN	UTR3	1	530	0.001886792
6	144852662	C>A	UCEC	144852661	144852666	+	hsa-miR-519b-5p	UTRN	UTR3	1	530	0.001886792
6	144852662	C>A	UCEC	144852661	144852666	+	hsa-miR-519c-5p	UTRN	UTR3	1	530	0.001886792
6	144852662	C>A	UCEC	144852661	144852666	+	hsa-miR-520c-5p	UTRN	UTR3	1	530	0.001886792
6	144852662	C>A	UCEC	144852662	144852667	+	hsa-miR-1251-5p	UTRN	UTR3	1	530	0.001886792
6	144852787	G>A	UCEC	144852780	144852808	+	hsa-miR-2682-5p	UTRN	UTR3	1	530	0.001886792
6	144852793	->T	UCEC	144852780	144852808	+	hsa-miR-2682-5p	UTRN	UTR3	4	530	0.00754717
6	144852794	T>A	UCEC	144852780	144852808	+	hsa-miR-2682-5p	UTRN	UTR3	1	530	0.001886792
6	152121757	A>G	UCEC	152121751	152121757	-	hsa-miR-493-5p	SYNE1	UTR3	1	530	0.001886792
6	152121941	C>A	UCEC	152121941	152121946	-	hsa-miR-671-5p	SYNE1	UTR3	1	530	0.001886792
6	152121956	T>G	UCEC	152121951	152121956	-	hsa-miR-410-3p	SYNE1	UTR3	1	530	0.001886792
6	56458095	C>A	UCEC	56458084	56458112	-	hsa-miR-1277-5p	DST	UTR3	1	530	0.001886792
6	56458132	A>C	UCEC	56458113	56458141	-	hsa-miR-126-5p	DST	UTR3	1	530	0.001886792
6	56458215	T>-	UCEC	56458209	56458237	-	hsa-miR-3150a-3p	DST	UTR3	2	530	0.003773585
6	56458364	C>T	UCEC	56458359	56458364	-	hsa-miR-887-3p	DST	UTR3	1	530	0.001886792
6	56458763	C>A	UCEC	56458762	56458767	-	hsa-miR-301a-3p	DST	UTR3	1	530	0.001886792
6	56458763	C>A	UCEC	56458762	56458767	-	hsa-miR-130a-3p	DST	UTR3	1	530	0.001886792
6	56458763	C>A	UCEC	56458762	56458767	-	hsa-miR-301b-3p	DST	UTR3	1	530	0.001886792
6	56458763	C>A	UCEC	56458759	56458764	-	hsa-miR-582-5p	DST	UTR3	1	530	0.001886792
6	56458763	C>A	UCEC	56458761	56458767	-	hsa-miR-152-3p	DST	UTR3	1	530	0.001886792
6	56458763	C>A	UCEC	56458761	56458789	-	hsa-miR-4295	DST	UTR3	1	530	0.001886792
6	56458763	C>A	UCEC	56458761	56458767	-	hsa-miR-148b-3p	DST	UTR3	1	530	0.001886792
6	56458763	C>A	UCEC	56458762	56458767	-	hsa-miR-130b-3p	DST	UTR3	1	530	0.001886792
6	56458763	C>A	UCEC	56458762	56458767	-	hsa-miR-454-3p	DST	UTR3	1	530	0.001886792
6	56458763	C>A	UCEC	56458761	56458767	-	hsa-miR-148a-3p	DST	UTR3	1	530	0.001886792
6	56458763	C>A	UCEC	56458761	56458789	-	hsa-miR-3666	DST	UTR3	1	530	0.001886792
6	56458784	A>G	UCEC	56458761	56458789	-	hsa-miR-4295	DST	UTR3	1	530	0.001886792
6	56458784	A>G	UCEC	56458761	56458789	-	hsa-miR-3666	DST	UTR3	1	530	0.001886792
6	56458835	->T	UCEC	56458828	56458856	-	hsa-miR-3200-5p	DST	UTR3	1	530	0.001886792
6	56458836	T>-	UCEC	56458828	56458856	-	hsa-miR-3200-5p	DST	UTR3	3	530	0.005660377
6	56458966	T>C	UCEC	56458963	56458968	-	hsa-miR-369-3p	DST	UTR3	1	530	0.001886792
6	63713807	A>C	UCEC	63713802	63713830	+	hsa-miR-105-5p	PHF3	UTR3	1	530	0.001886792
6	63713810	T>G	UCEC	63713802	63713830	+	hsa-miR-105-5p	PHF3	UTR3	1	530	0.001886792
6	63713960	G>A	UCEC	63713944	63713972	+	hsa-miR-3163	PHF3	UTR3	1	530	0.001886792
6	63713960	G>A	UCEC	63713940	63713968	+	hsa-miR-5688	PHF3	UTR3	1	530	0.001886792
6	63714042	T>C	UCEC	63714018	63714046	+	hsa-miR-1277-5p	PHF3	UTR3	1	530	0.001886792
7	142106104	->GCAAA	UCEC	142106101	142106106	+	hsa-miR-155-5p	MGAM	UTR3	1	530	0.001886792
7	152134934	A>G	UCEC	152134931	152134936	-	hsa-miR-380-3p	KMT2C	UTR3	1	530	0.001886792
7	152135084	T>G	UCEC	152135084	152135090	-	hsa-miR-200c-3p	KMT2C	UTR3	1	530	0.001886792
7	152135084	T>G	UCEC	152135084	152135090	-	hsa-miR-429	KMT2C	UTR3	1	530	0.001886792
7	152135084	T>G	UCEC	152135084	152135090	-	hsa-miR-200b-3p	KMT2C	UTR3	1	530	0.001886792
7	152135164	C>A	UCEC	152135159	152135164	-	hsa-miR-335-5p	KMT2C	UTR3	1	530	0.001886792
7	152135535	A>-	UCEC	152135535	152135540	-	hsa-miR-129-5p	KMT2C	UTR3	1	530	0.001886792
7	152135566	C>T	UCEC	152135544	152135572	-	hsa-miR-3121-3p	KMT2C	UTR3	1	530	0.001886792
7	152135826	C>T	UCEC	152135825	152135853	-	hsa-miR-3194-3p	KMT2C	UTR3	1	530	0.001886792
7	152135850	T>G	UCEC	152135846	152135874	-	hsa-miR-3163	KMT2C	UTR3	1	530	0.001886792
7	152135850	T>G	UCEC	152135846	152135853	-	hsa-miR-340-5p	KMT2C	UTR3	1	530	0.001886792
7	152135850	T>G	UCEC	152135839	152135867	-	hsa-miR-4735-3p	KMT2C	UTR3	1	530	0.001886792
7	152135850	T>G	UCEC	152135825	152135853	-	hsa-miR-3194-3p	KMT2C	UTR3	1	530	0.001886792
7	152135946	T>C	UCEC	152135927	152135948	-	hsa-miR-374b-5p	KMT2C	UTR3	1	530	0.001886792
7	152135946	T>C	UCEC	152135927	152135950	-	hsa-miR-374a-5p	KMT2C	UTR3	1	530	0.001886792
7	152135954	T>A	UCEC	152135953	152135958	-	hsa-miR-944	KMT2C	UTR3	1	530	0.001886792
7	152136110	C>A	UCEC	152136109	152136115	-	hsa-miR-6838-5p	KMT2C	UTR3	1	530	0.001886792
7	152136110	C>A	UCEC	152136110	152136115	-	hsa-miR-107	KMT2C	UTR3	1	530	0.001886792
7	152136110	C>A	UCEC	152136104	152136110	-	hsa-miR-194-5p	KMT2C	UTR3	1	530	0.001886792
7	152136110	C>A	UCEC	152136110	152136115	-	hsa-miR-103a-3p	KMT2C	UTR3	1	530	0.001886792
7	152136317	C>A	UCEC	152136314	152136319	-	hsa-miR-140-5p	KMT2C	UTR3	1	530	0.001886792
7	152136444	G>A	UCEC	152136439	152136444	-	hsa-miR-1913	KMT2C	UTR3	1	530	0.001886792
7	152136444	G>A	UCEC	152136439	152136444	-	hsa-miR-324-3p	KMT2C	UTR3	1	530	0.001886792
7	152136462	C>T	UCEC	152136462	152136467	-	hsa-miR-760	KMT2C	UTR3	1	530	0.001886792
7	152136640	G>A	UCEC	152136634	152136640	-	hsa-miR-873-5p	KMT2C	UTR3	1	530	0.001886792
7	21901271	G>T	UCEC	21901271	21901277	-	hsa-miR-1251-5p	CDCA7L	UTR3	1	530	0.001886792
7	21901301	A>C	UCEC	21901297	21901302	-	hsa-miR-876-5p	CDCA7L	UTR3	1	530	0.001886792
7	21901830	G>T	UCEC	21901830	21901836	-	hsa-miR-139-5p	CDCA7L	UTR3	1	530	0.001886792
8	120371322	T>C	UCEC	120371322	120371327	+	hsa-miR-361-3p	COL14A1	UTR3	1	530	0.001886792
8	76864705	A>G	UCEC	76864700	76864728	+	hsa-miR-202-5p	ZFHX4	UTR3	1	530	0.001886792
8	76864705	A>G	UCEC	76864700	76864728	+	hsa-miR-337-3p	ZFHX4	UTR3	1	530	0.001886792
8	76864718	C>T	UCEC	76864700	76864728	+	hsa-miR-202-5p	ZFHX4	UTR3	1	530	0.001886792
8	76864718	C>T	UCEC	76864700	76864728	+	hsa-miR-337-3p	ZFHX4	UTR3	1	530	0.001886792
8	76864799	A>-	UCEC	76864795	76864816	+	hsa-miR-758-3p	ZFHX4	UTR3	2	530	0.003773585
8	76864808	T>A	UCEC	76864795	76864816	+	hsa-miR-758-3p	ZFHX4	UTR3	1	530	0.001886792
8	76864842	A>G	UCEC	76864840	76864845	+	hsa-miR-129-5p	ZFHX4	UTR3	1	530	0.001886792
8	76864923	A>G	UCEC	76864918	76864923	+	hsa-miR-516b-5p	ZFHX4	UTR3	1	530	0.001886792
8	76864923	A>G	UCEC	76864923	76864929	+	hsa-miR-494-3p	ZFHX4	UTR3	1	530	0.001886792
8	76864926	T>C	UCEC	76864923	76864929	+	hsa-miR-494-3p	ZFHX4	UTR3	1	530	0.001886792
8	76865007	T>G	UCEC	76865006	76865012	+	hsa-miR-5688	ZFHX4	UTR3	1	530	0.001886792
8	76865007	T>G	UCEC	76865006	76865012	+	hsa-miR-495-3p	ZFHX4	UTR3	1	530	0.001886792
8	76865007	T>G	UCEC	76864990	76865018	+	hsa-miR-3140-3p	ZFHX4	UTR3	1	530	0.001886792
8	76865007	T>G	UCEC	76864982	76865010	+	hsa-miR-105-5p	ZFHX4	UTR3	1	530	0.001886792
8	76865085	G>A	UCEC	76865073	76865101	+	hsa-miR-493-5p	ZFHX4	UTR3	1	530	0.001886792
8	76865085	G>A	UCEC	76865070	76865091	+	hsa-miR-329-3p	ZFHX4	UTR3	1	530	0.001886792
8	76865085	G>A	UCEC	76865070	76865091	+	hsa-miR-362-3p	ZFHX4	UTR3	1	530	0.001886792
8	76865111	A>G	UCEC	76865096	76865124	+	hsa-miR-545-5p	ZFHX4	UTR3	1	530	0.001886792
8	76865111	A>G	UCEC	76865106	76865112	+	hsa-miR-142-5p	ZFHX4	UTR3	1	530	0.001886792
8	76865111	A>G	UCEC	76865106	76865113	+	hsa-miR-5590-3p	ZFHX4	UTR3	1	530	0.001886792
8	76865111	A>G	UCEC	76865107	76865113	+	hsa-miR-340-5p	ZFHX4	UTR3	1	530	0.001886792
8	76865114	A>G	UCEC	76865096	76865124	+	hsa-miR-545-5p	ZFHX4	UTR3	1	530	0.001886792
8	76865114	A>G	UCEC	76865113	76865118	+	hsa-miR-296-3p	ZFHX4	UTR3	1	530	0.001886792
8	76865233	G>A	UCEC	76865220	76865248	+	hsa-miR-1277-5p	ZFHX4	UTR3	1	530	0.001886792
8	76865300	C>A	UCEC	76865300	76865305	+	hsa-miR-196a-5p	ZFHX4	UTR3	1	530	0.001886792
8	76865300	C>A	UCEC	76865300	76865305	+	hsa-miR-196b-5p	ZFHX4	UTR3	1	530	0.001886792
8	76865300	C>A	UCEC	76865299	76865304	+	hsa-miR-379-5p	ZFHX4	UTR3	1	530	0.001886792
8	76865431	G>A	UCEC	76865427	76865433	+	hsa-miR-3200-3p	ZFHX4	UTR3	1	530	0.001886792
8	76865498	->G	UCEC	76865489	76865517	+	hsa-miR-186-5p	ZFHX4	UTR3	1	530	0.001886792
8	76865498	->G	UCEC	76865495	76865523	+	hsa-miR-329-3p	ZFHX4	UTR3	1	530	0.001886792
8	76865498	->G	UCEC	76865495	76865523	+	hsa-miR-362-3p	ZFHX4	UTR3	1	530	0.001886792
8	76865500	T>C	UCEC	76865489	76865517	+	hsa-miR-186-5p	ZFHX4	UTR3	1	530	0.001886792
8	76865500	T>C	UCEC	76865495	76865523	+	hsa-miR-329-3p	ZFHX4	UTR3	1	530	0.001886792
8	76865500	T>C	UCEC	76865495	76865523	+	hsa-miR-362-3p	ZFHX4	UTR3	1	530	0.001886792
8	76865501	T>A	UCEC	76865489	76865517	+	hsa-miR-186-5p	ZFHX4	UTR3	1	530	0.001886792
8	76865501	T>A	UCEC	76865495	76865523	+	hsa-miR-329-3p	ZFHX4	UTR3	1	530	0.001886792
8	76865501	T>A	UCEC	76865495	76865523	+	hsa-miR-362-3p	ZFHX4	UTR3	1	530	0.001886792
8	76865513	C>A	UCEC	76865489	76865517	+	hsa-miR-186-5p	ZFHX4	UTR3	1	530	0.001886792
8	76865513	C>A	UCEC	76865495	76865523	+	hsa-miR-329-3p	ZFHX4	UTR3	1	530	0.001886792
8	76865513	C>A	UCEC	76865495	76865523	+	hsa-miR-362-3p	ZFHX4	UTR3	1	530	0.001886792
8	76865627	A>G	UCEC	76865621	76865627	+	hsa-miR-1297	ZFHX4	UTR3	1	530	0.001886792
8	76865627	A>G	UCEC	76865621	76865627	+	hsa-miR-26b-5p	ZFHX4	UTR3	1	530	0.001886792
8	76865627	A>G	UCEC	76865621	76865627	+	hsa-miR-26a-5p	ZFHX4	UTR3	1	530	0.001886792
8	76865627	A>G	UCEC	76865623	76865628	+	hsa-miR-498	ZFHX4	UTR3	1	530	0.001886792
8	76865627	A>G	UCEC	76865621	76865627	+	hsa-miR-4465	ZFHX4	UTR3	1	530	0.001886792
8	76865763	G>T	UCEC	76865755	76865783	+	hsa-miR-144-5p	ZFHX4	UTR3	1	530	0.001886792
8	76865763	G>T	UCEC	76865763	76865768	+	hsa-miR-455-3p	ZFHX4	UTR3	1	530	0.001886792
8	76865879	T>C	UCEC	76865862	76865890	+	hsa-miR-3163	ZFHX4	UTR3	1	530	0.001886792
8	76865879	T>C	UCEC	76865874	76865879	+	hsa-miR-552-3p	ZFHX4	UTR3	1	530	0.001886792
8	76865879	T>C	UCEC	76865878	76865883	+	hsa-miR-548o-3p	ZFHX4	UTR3	1	530	0.001886792
8	76865879	T>C	UCEC	76865878	76865883	+	hsa-miR-1323	ZFHX4	UTR3	1	530	0.001886792
8	76865881	TTG>-	UCEC	76865862	76865890	+	hsa-miR-3163	ZFHX4	UTR3	1	530	0.001886792
8	76865881	TTG>-	UCEC	76865880	76865885	+	hsa-miR-495-3p	ZFHX4	UTR3	1	530	0.001886792
8	76865881	TTG>-	UCEC	76865880	76865885	+	hsa-miR-5688	ZFHX4	UTR3	1	530	0.001886792
8	76865881	TTG>-	UCEC	76865878	76865883	+	hsa-miR-548o-3p	ZFHX4	UTR3	1	530	0.001886792
8	76865881	TTG>-	UCEC	76865878	76865883	+	hsa-miR-1323	ZFHX4	UTR3	1	530	0.001886792
8	76865939	T>C	UCEC	76865925	76865953	+	hsa-miR-5688	ZFHX4	UTR3	1	530	0.001886792
8	76865996	T>G	UCEC	76865980	76866008	+	hsa-miR-3942-5p	ZFHX4	UTR3	2	530	0.003773585
8	76865996	T>G	UCEC	76865995	76866000	+	hsa-miR-340-5p	ZFHX4	UTR3	2	530	0.003773585
8	76865996	T>G	UCEC	76865980	76866008	+	hsa-miR-4703-5p	ZFHX4	UTR3	2	530	0.003773585
8	76865996	T>A	UCEC	76865980	76866008	+	hsa-miR-3942-5p	ZFHX4	UTR3	2	530	0.003773585
8	76865996	T>A	UCEC	76865995	76866000	+	hsa-miR-340-5p	ZFHX4	UTR3	2	530	0.003773585
8	76865996	T>A	UCEC	76865980	76866008	+	hsa-miR-4703-5p	ZFHX4	UTR3	2	530	0.003773585
8	76866012	T>G	UCEC	76866009	76866015	+	hsa-miR-330-3p	ZFHX4	UTR3	1	530	0.001886792
8	76866012	T>G	UCEC	76866012	76866018	+	hsa-miR-545-3p	ZFHX4	UTR3	1	530	0.001886792
8	76866030	C>A	UCEC	76866027	76866032	+	hsa-miR-545-3p	ZFHX4	UTR3	1	530	0.001886792
8	76866108	T>C	UCEC	76866104	76866110	+	hsa-miR-130a-5p	ZFHX4	UTR3	1	530	0.001886792
8	76866108	T>C	UCEC	76866104	76866110	+	hsa-miR-23c	ZFHX4	UTR3	1	530	0.001886792
8	76866108	T>C	UCEC	76866104	76866110	+	hsa-miR-23a-3p	ZFHX4	UTR3	1	530	0.001886792
8	76866108	T>C	UCEC	76866104	76866110	+	hsa-miR-23b-3p	ZFHX4	UTR3	1	530	0.001886792
8	76866407	G>A	UCEC	76866390	76866418	+	hsa-miR-5590-3p	ZFHX4	UTR3	1	530	0.001886792
8	76866407	G>A	UCEC	76866404	76866432	+	hsa-miR-3163	ZFHX4	UTR3	1	530	0.001886792
8	76866525	C>T	UCEC	76866518	76866525	+	hsa-miR-494-3p	ZFHX4	UTR3	1	530	0.001886792
8	76866557	T>C	UCEC	76866557	76866562	+	hsa-miR-1286	ZFHX4	UTR3	1	530	0.001886792
8	76866557	T>C	UCEC	76866551	76866557	+	hsa-miR-367-3p	ZFHX4	UTR3	1	530	0.001886792
8	76866557	T>C	UCEC	76866551	76866557	+	hsa-miR-92a-3p	ZFHX4	UTR3	1	530	0.001886792
8	76866557	T>C	UCEC	76866551	76866557	+	hsa-miR-32-5p	ZFHX4	UTR3	1	530	0.001886792
8	76866557	T>C	UCEC	76866551	76866557	+	hsa-miR-25-3p	ZFHX4	UTR3	1	530	0.001886792
8	76866557	T>C	UCEC	76866551	76866557	+	hsa-miR-363-3p	ZFHX4	UTR3	1	530	0.001886792
8	76866557	T>C	UCEC	76866551	76866557	+	hsa-miR-92b-3p	ZFHX4	UTR3	1	530	0.001886792
8	76866585	G>A	UCEC	76866583	76866611	+	hsa-miR-4703-5p	ZFHX4	UTR3	1	530	0.001886792
8	76866585	G>A	UCEC	76866583	76866611	+	hsa-miR-3942-5p	ZFHX4	UTR3	1	530	0.001886792
8	76866585	G>A	UCEC	76866579	76866585	+	hsa-miR-4436a	ZFHX4	UTR3	1	530	0.001886792
8	76866585	G>A	UCEC	76866579	76866585	+	hsa-miR-5000-3p	ZFHX4	UTR3	1	530	0.001886792
8	76866585	G>A	UCEC	76866583	76866589	+	hsa-miR-506-5p	ZFHX4	UTR3	1	530	0.001886792
8	76866665	C>T	UCEC	76866660	76866688	+	hsa-miR-4676-3p	ZFHX4	UTR3	1	530	0.001886792
8	76866767	A>C	UCEC	76866751	76866779	+	hsa-miR-3613-5p	ZFHX4	UTR3	1	530	0.001886792
8	76866790	->A	UCEC	76866781	76866809	+	hsa-miR-129-5p	ZFHX4	UTR3	1	530	0.001886792
8	76866798	G>A	UCEC	76866781	76866809	+	hsa-miR-129-5p	ZFHX4	UTR3	1	530	0.001886792
8	76866799	A>-	UCEC	76866781	76866809	+	hsa-miR-129-5p	ZFHX4	UTR3	4	530	0.00754717
8	76866799	A>G	UCEC	76866781	76866809	+	hsa-miR-129-5p	ZFHX4	UTR3	4	530	0.00754717
8	76866807	->G	UCEC	76866781	76866809	+	hsa-miR-129-5p	ZFHX4	UTR3	1	530	0.001886792
8	76866808	A>G	UCEC	76866781	76866809	+	hsa-miR-129-5p	ZFHX4	UTR3	1	530	0.001886792
8	76866828	A>G	UCEC	76866822	76866828	+	hsa-miR-145-5p	ZFHX4	UTR3	1	530	0.001886792
8	76866828	A>G	UCEC	76866824	76866829	+	hsa-miR-5586-5p	ZFHX4	UTR3	1	530	0.001886792
8	76866828	A>G	UCEC	76866822	76866828	+	hsa-miR-5195-3p	ZFHX4	UTR3	1	530	0.001886792
8	76866976	A>G	UCEC	76866971	76866976	+	hsa-miR-33a-5p	ZFHX4	UTR3	1	530	0.001886792
8	76866976	A>G	UCEC	76866971	76866976	+	hsa-miR-33b-5p	ZFHX4	UTR3	1	530	0.001886792
8	76866976	A>G	UCEC	76866970	76866998	+	hsa-miR-3140-3p	ZFHX4	UTR3	1	530	0.001886792
8	76866983	G>T	UCEC	76866970	76866998	+	hsa-miR-3140-3p	ZFHX4	UTR3	1	530	0.001886792
8	76867028	C>T	UCEC	76867024	76867029	+	hsa-miR-299-5p	ZFHX4	UTR3	1	530	0.001886792
8	76867028	C>T	UCEC	76867024	76867052	+	hsa-miR-3163	ZFHX4	UTR3	1	530	0.001886792
8	76867059	G>T	UCEC	76867058	76867086	+	hsa-miR-545-5p	ZFHX4	UTR3	1	530	0.001886792
8	76867126	A>G	UCEC	76867124	76867152	+	hsa-miR-3163	ZFHX4	UTR3	1	530	0.001886792
8	76867141	C>T	UCEC	76867139	76867160	+	hsa-miR-542-3p	ZFHX4	UTR3	1	530	0.001886792
8	76867141	C>T	UCEC	76867124	76867152	+	hsa-miR-3163	ZFHX4	UTR3	1	530	0.001886792
8	76867141	C>T	UCEC	76867139	76867160	+	hsa-miR-542-3p	ZFHX4	UTR3	1	530	0.001886792
8	76867141	C>T	UCEC	76867124	76867152	+	hsa-miR-3163	ZFHX4	UTR3	1	530	0.001886792
8	76867141	->T	UCEC	76867139	76867160	+	hsa-miR-542-3p	ZFHX4	UTR3	1	530	0.001886792
8	76867141	->T	UCEC	76867124	76867152	+	hsa-miR-3163	ZFHX4	UTR3	1	530	0.001886792
8	76867141	->T	UCEC	76867139	76867160	+	hsa-miR-542-3p	ZFHX4	UTR3	1	530	0.001886792
8	76867141	->T	UCEC	76867124	76867152	+	hsa-miR-3163	ZFHX4	UTR3	1	530	0.001886792
8	76867242	T>G	UCEC	76867240	76867246	+	hsa-miR-495-3p	ZFHX4	UTR3	1	530	0.001886792
8	76867242	T>G	UCEC	76867240	76867246	+	hsa-miR-5688	ZFHX4	UTR3	1	530	0.001886792
8	99877235	C>T	UCEC	99877226	99877254	+	hsa-miR-376b-3p	VPS13B	UTR3	1	530	0.001886792
8	99877235	C>T	UCEC	99877217	99877245	+	hsa-miR-219a-2-3p	VPS13B	UTR3	1	530	0.001886792
8	99877235	C>T	UCEC	99877226	99877254	+	hsa-miR-376a-3p	VPS13B	UTR3	1	530	0.001886792
8	99877235	C>T	UCEC	99877220	99877242	+	hsa-miR-375	VPS13B	UTR3	1	530	0.001886792
8	99877351	T>G	UCEC	99877349	99877354	+	hsa-miR-624-3p	VPS13B	UTR3	1	530	0.001886792
8	99877351	T>G	UCEC	99877346	99877352	+	hsa-miR-541-5p	VPS13B	UTR3	1	530	0.001886792
8	99877351	T>G	UCEC	99877349	99877356	+	hsa-miR-381-3p	VPS13B	UTR3	1	530	0.001886792
8	99877351	T>G	UCEC	99877349	99877356	+	hsa-miR-300	VPS13B	UTR3	1	530	0.001886792
9	19373512	T>C	UCEC	19373511	19373516	+	hsa-miR-300	DENND4C	UTR3	1	530	0.001886792
9	19373512	T>C	UCEC	19373510	19373515	+	hsa-miR-524-5p	DENND4C	UTR3	1	530	0.001886792
9	19373512	T>C	UCEC	19373510	19373515	+	hsa-miR-520d-5p	DENND4C	UTR3	1	530	0.001886792
9	19373512	T>C	UCEC	19373511	19373516	+	hsa-miR-381-3p	DENND4C	UTR3	1	530	0.001886792
X	100291667	T>G	UCEC	100291665	100291693	-	hsa-miR-200c-3p	PCDH19	UTR3	1	530	0.001886792
X	100291667	T>G	UCEC	100291664	100291682	-	hsa-miR-655-3p	PCDH19	UTR3	1	530	0.001886792
X	100291667	T>G	UCEC	100291665	100291693	-	hsa-miR-200b-3p	PCDH19	UTR3	1	530	0.001886792
X	100291667	T>G	UCEC	100291664	100291682	-	hsa-miR-374c-5p	PCDH19	UTR3	1	530	0.001886792
X	100291667	T>G	UCEC	100291665	100291693	-	hsa-miR-429	PCDH19	UTR3	1	530	0.001886792
X	100292084	G>A	UCEC	100292078	100292084	-	hsa-miR-1179	PCDH19	UTR3	1	530	0.001886792
X	100294459	G>T	UCEC	100294440	100294461	-	hsa-miR-4640-3p	PCDH19	UTR3	1	530	0.001886792
X	100295284	G>T	UCEC	100295268	100295287	-	hsa-miR-185-5p	PCDH19	UTR3	1	530	0.001886792
X	100296188	C>A	UCEC	100296172	100296200	-	hsa-miR-1277-5p	PCDH19	UTR3	1	530	0.001886792
X	100296188	C>A	UCEC	100296165	100296193	-	hsa-miR-3194-3p	PCDH19	UTR3	1	530	0.001886792
X	100296188	C>A	UCEC	100296162	100296190	-	hsa-miR-4429	PCDH19	UTR3	1	530	0.001886792
X	100296188	C>A	UCEC	100296162	100296190	-	hsa-miR-320d	PCDH19	UTR3	1	530	0.001886792
X	100296188	C>A	UCEC	100296162	100296190	-	hsa-miR-320c	PCDH19	UTR3	1	530	0.001886792
X	100296188	C>A	UCEC	100296162	100296190	-	hsa-miR-320b	PCDH19	UTR3	1	530	0.001886792
X	100296188	C>A	UCEC	100296162	100296190	-	hsa-miR-320a	PCDH19	UTR3	1	530	0.001886792
X	100296188	C>A	UCEC	100296168	100296196	-	hsa-miR-4766-5p	PCDH19	UTR3	1	530	0.001886792
X	105955661	G>T	UCEC	105955650	105955674	+	hsa-miR-216b-5p	NRK	UTR3	1	530	0.001886792
X	105955661	G>T	UCEC	105955658	105955663	+	hsa-miR-3200-5p	NRK	UTR3	1	530	0.001886792
X	105955661	G>T	UCEC	105955652	105955680	+	hsa-miR-664b-3p	NRK	UTR3	1	530	0.001886792
X	105955661	G>T	UCEC	105955652	105955680	+	hsa-miR-579-3p	NRK	UTR3	1	530	0.001886792
X	105955661	G>T	UCEC	105955641	105955669	+	hsa-miR-4766-5p	NRK	UTR3	1	530	0.001886792
X	105955678	G>T	UCEC	105955652	105955680	+	hsa-miR-664b-3p	NRK	UTR3	1	530	0.001886792
X	105955678	G>T	UCEC	105955652	105955680	+	hsa-miR-579-3p	NRK	UTR3	1	530	0.001886792
X	105955680	G>A	UCEC	105955652	105955680	+	hsa-miR-664b-3p	NRK	UTR3	1	530	0.001886792
X	105955680	G>A	UCEC	105955652	105955680	+	hsa-miR-579-3p	NRK	UTR3	1	530	0.001886792
X	105955819	C>A	UCEC	105955794	105955822	+	hsa-miR-3617-5p	NRK	UTR3	1	530	0.001886792
X	105955819	C>A	UCEC	105955800	105955828	+	hsa-miR-19a-3p	NRK	UTR3	1	530	0.001886792
X	105955819	C>A	UCEC	105955794	105955822	+	hsa-miR-641	NRK	UTR3	1	530	0.001886792
X	105955819	C>A	UCEC	105955800	105955828	+	hsa-miR-19b-3p	NRK	UTR3	1	530	0.001886792
X	109641465	G>A	UCEC	109641463	109641468	-	hsa-miR-524-5p	ACSL4	UTR3	1	530	0.001886792
X	109641465	G>A	UCEC	109641463	109641468	-	hsa-miR-520d-5p	ACSL4	UTR3	1	530	0.001886792
X	109641468	T>G	UCEC	109641463	109641468	-	hsa-miR-524-5p	ACSL4	UTR3	1	530	0.001886792
X	109641468	T>G	UCEC	109641463	109641468	-	hsa-miR-520d-5p	ACSL4	UTR3	1	530	0.001886792
X	109641787	T>C	UCEC	109641783	109641789	-	hsa-miR-513b-5p	ACSL4	UTR3	1	530	0.001886792
X	109642213	->T	UCEC	109642206	109642234	-	hsa-miR-224-3p	ACSL4	UTR3	1	530	0.001886792
X	109642214	T>-	UCEC	109642206	109642234	-	hsa-miR-224-3p	ACSL4	UTR3	2	530	0.003773585
X	109642222	A>G	UCEC	109642206	109642234	-	hsa-miR-224-3p	ACSL4	UTR3	1	530	0.001886792
X	109642222	A>G	UCEC	109642222	109642227	-	hsa-miR-23b-3p	ACSL4	UTR3	1	530	0.001886792
X	109642222	A>G	UCEC	109642222	109642227	-	hsa-miR-23a-3p	ACSL4	UTR3	1	530	0.001886792
X	109642527	C>A	UCEC	109642524	109642529	-	hsa-miR-186-5p	ACSL4	UTR3	3	530	0.005660377
X	109642634	C>T	UCEC	109642630	109642635	-	hsa-miR-520a-3p	ACSL4	UTR3	1	530	0.001886792
X	109642634	C>T	UCEC	109642629	109642635	-	hsa-miR-20b-5p	ACSL4	UTR3	1	530	0.001886792
X	109642634	C>T	UCEC	109642630	109642635	-	hsa-miR-520b	ACSL4	UTR3	1	530	0.001886792
X	109642634	C>T	UCEC	109642631	109642637	-	hsa-miR-130a-3p	ACSL4	UTR3	1	530	0.001886792
X	109642634	C>T	UCEC	109642632	109642638	-	hsa-miR-19b-3p	ACSL4	UTR3	1	530	0.001886792
X	109642634	C>T	UCEC	109642631	109642637	-	hsa-miR-301a-3p	ACSL4	UTR3	1	530	0.001886792
X	109642634	C>T	UCEC	109642630	109642636	-	hsa-miR-519a-3p	ACSL4	UTR3	1	530	0.001886792
X	109642634	C>T	UCEC	109642629	109642634	-	hsa-miR-17-5p	ACSL4	UTR3	1	530	0.001886792
X	109642634	C>T	UCEC	109642631	109642637	-	hsa-miR-4295	ACSL4	UTR3	1	530	0.001886792
X	109642634	C>T	UCEC	109642631	109642637	-	hsa-miR-3666	ACSL4	UTR3	1	530	0.001886792
X	109642634	C>T	UCEC	109642629	109642635	-	hsa-miR-106b-5p	ACSL4	UTR3	1	530	0.001886792
X	109642634	C>T	UCEC	109642629	109642634	-	hsa-miR-20a-5p	ACSL4	UTR3	1	530	0.001886792
X	109642634	C>T	UCEC	109642630	109642635	-	hsa-miR-520c-3p	ACSL4	UTR3	1	530	0.001886792
X	109642634	C>T	UCEC	109642631	109642637	-	hsa-miR-301b-3p	ACSL4	UTR3	1	530	0.001886792
X	109642634	C>T	UCEC	109642630	109642635	-	hsa-miR-520e	ACSL4	UTR3	1	530	0.001886792
X	109642634	C>T	UCEC	109642631	109642637	-	hsa-miR-130b-3p	ACSL4	UTR3	1	530	0.001886792
X	109642634	C>T	UCEC	109642630	109642635	-	hsa-miR-302e	ACSL4	UTR3	1	530	0.001886792
X	109642634	C>T	UCEC	109642630	109642636	-	hsa-miR-519b-3p	ACSL4	UTR3	1	530	0.001886792
X	109642634	C>T	UCEC	109642630	109642635	-	hsa-miR-302d-3p	ACSL4	UTR3	1	530	0.001886792
X	109642634	C>T	UCEC	109642629	109642635	-	hsa-miR-526b-3p	ACSL4	UTR3	1	530	0.001886792
X	109642634	C>T	UCEC	109642630	109642635	-	hsa-miR-302c-3p	ACSL4	UTR3	1	530	0.001886792
X	109642634	C>T	UCEC	109642630	109642635	-	hsa-miR-302b-3p	ACSL4	UTR3	1	530	0.001886792
X	109642634	C>T	UCEC	109642630	109642635	-	hsa-miR-302a-3p	ACSL4	UTR3	1	530	0.001886792
X	109642634	C>T	UCEC	109642630	109642635	-	hsa-miR-520d-3p	ACSL4	UTR3	1	530	0.001886792
X	109642634	C>T	UCEC	109642629	109642635	-	hsa-miR-519d-3p	ACSL4	UTR3	1	530	0.001886792
X	109642634	C>T	UCEC	109642631	109642637	-	hsa-miR-454-3p	ACSL4	UTR3	1	530	0.001886792
X	109642634	C>T	UCEC	109642629	109642635	-	hsa-miR-93-5p	ACSL4	UTR3	1	530	0.001886792
X	109642634	C>T	UCEC	109642629	109642634	-	hsa-miR-106a-5p	ACSL4	UTR3	1	530	0.001886792
X	109642634	C>T	UCEC	109642630	109642635	-	hsa-miR-373-3p	ACSL4	UTR3	1	530	0.001886792
X	109642634	C>T	UCEC	109642632	109642638	-	hsa-miR-19a-3p	ACSL4	UTR3	1	530	0.001886792
X	109642634	C>T	UCEC	109642630	109642635	-	hsa-miR-372-3p	ACSL4	UTR3	1	530	0.001886792
X	109642634	C>T	UCEC	109642630	109642636	-	hsa-miR-519c-3p	ACSL4	UTR3	1	530	0.001886792
X	109642824	A>C	UCEC	109642819	109642825	-	hsa-miR-5195-3p	ACSL4	UTR3	1	530	0.001886792
X	109642824	A>C	UCEC	109642819	109642825	-	hsa-miR-145-5p	ACSL4	UTR3	1	530	0.001886792
X	109642861	C>T	UCEC	109642857	109642862	-	hsa-miR-212-3p	ACSL4	UTR3	1	530	0.001886792
X	109642861	C>T	UCEC	109642857	109642862	-	hsa-miR-132-3p	ACSL4	UTR3	1	530	0.001886792
X	109642890	A>C	UCEC	109642884	109642890	-	hsa-miR-1323	ACSL4	UTR3	1	530	0.001886792
X	109642890	A>C	UCEC	109642884	109642890	-	hsa-miR-548o-3p	ACSL4	UTR3	1	530	0.001886792
X	109643181	G>T	UCEC	109643179	109643184	-	hsa-miR-576-5p	ACSL4	UTR3	1	530	0.001886792
X	109643537	A>C	UCEC	109643521	109643549	-	hsa-miR-656-3p	ACSL4	UTR3	1	530	0.001886792
X	109643537	A>C	UCEC	109643522	109643550	-	hsa-miR-556-3p	ACSL4	UTR3	1	530	0.001886792
X	109643545	G>T	UCEC	109643522	109643550	-	hsa-miR-556-3p	ACSL4	UTR3	1	530	0.001886792
X	109643545	G>T	UCEC	109643541	109643546	-	hsa-miR-205-5p	ACSL4	UTR3	1	530	0.001886792
X	109643545	G>T	UCEC	109643521	109643549	-	hsa-miR-656-3p	ACSL4	UTR3	1	530	0.001886792
X	109643545	G>T	UCEC	109643543	109643548	-	hsa-miR-498	ACSL4	UTR3	1	530	0.001886792
X	109643565	C>A	UCEC	109643550	109643578	-	hsa-miR-224-3p	ACSL4	UTR3	1	530	0.001886792
X	109643569	A>C	UCEC	109643550	109643578	-	hsa-miR-224-3p	ACSL4	UTR3	1	530	0.001886792
X	109643577	G>A	UCEC	109643574	109643579	-	hsa-miR-129-2-3p	ACSL4	UTR3	1	530	0.001886792
X	109643577	G>A	UCEC	109643575	109643581	-	hsa-miR-3173-5p	ACSL4	UTR3	1	530	0.001886792
X	109643577	G>A	UCEC	109643550	109643578	-	hsa-miR-224-3p	ACSL4	UTR3	1	530	0.001886792
X	109643581	G>A	UCEC	109643579	109643584	-	hsa-miR-1301-3p	ACSL4	UTR3	1	530	0.001886792
X	109643581	G>A	UCEC	109643580	109643585	-	hsa-miR-107	ACSL4	UTR3	1	530	0.001886792
X	109643581	G>A	UCEC	109643578	109643606	-	hsa-miR-5047	ACSL4	UTR3	1	530	0.001886792
X	109643581	G>A	UCEC	109643580	109643585	-	hsa-miR-103a-3p	ACSL4	UTR3	1	530	0.001886792
X	109643581	G>A	UCEC	109643575	109643581	-	hsa-miR-3173-5p	ACSL4	UTR3	1	530	0.001886792
X	109643584	G>C	UCEC	109643579	109643584	-	hsa-miR-1301-3p	ACSL4	UTR3	1	530	0.001886792
X	109643584	G>C	UCEC	109643580	109643585	-	hsa-miR-107	ACSL4	UTR3	1	530	0.001886792
X	109643584	G>C	UCEC	109643578	109643606	-	hsa-miR-5047	ACSL4	UTR3	1	530	0.001886792
X	109643584	G>C	UCEC	109643580	109643585	-	hsa-miR-103a-3p	ACSL4	UTR3	1	530	0.001886792
X	109643696	G>T	UCEC	109643691	109643696	-	hsa-miR-181b-5p	ACSL4	UTR3	1	530	0.001886792
X	109643696	G>T	UCEC	109643691	109643696	-	hsa-miR-181c-5p	ACSL4	UTR3	1	530	0.001886792
X	109643696	G>T	UCEC	109643691	109643696	-	hsa-miR-181a-5p	ACSL4	UTR3	1	530	0.001886792
X	109643696	G>T	UCEC	109643691	109643696	-	hsa-miR-181d-5p	ACSL4	UTR3	1	530	0.001886792
X	109643729	T>G	UCEC	109643724	109643729	-	hsa-miR-323a-3p	ACSL4	UTR3	1	530	0.001886792
X	109643941	A>G	UCEC	109643938	109643943	-	hsa-miR-181d-5p	ACSL4	UTR3	1	530	0.001886792
X	109643941	A>G	UCEC	109643938	109643943	-	hsa-miR-181b-5p	ACSL4	UTR3	1	530	0.001886792
X	109643941	A>G	UCEC	109643941	109643946	-	hsa-miR-576-5p	ACSL4	UTR3	1	530	0.001886792
X	109643941	A>G	UCEC	109643938	109643943	-	hsa-miR-181c-5p	ACSL4	UTR3	1	530	0.001886792
X	109643941	A>G	UCEC	109643938	109643943	-	hsa-miR-181a-5p	ACSL4	UTR3	1	530	0.001886792
X	109643970	G>T	UCEC	109643952	109643980	-	hsa-miR-5688	ACSL4	UTR3	1	530	0.001886792
X	109643970	G>T	UCEC	109643969	109643975	-	hsa-miR-518d-5p	ACSL4	UTR3	1	530	0.001886792
X	109643970	G>T	UCEC	109643969	109643975	-	hsa-miR-522-5p	ACSL4	UTR3	1	530	0.001886792
X	109643970	G>T	UCEC	109643969	109643975	-	hsa-miR-518f-5p	ACSL4	UTR3	1	530	0.001886792
X	109643970	G>T	UCEC	109643969	109643975	-	hsa-miR-519b-5p	ACSL4	UTR3	1	530	0.001886792
X	109643970	G>T	UCEC	109643969	109643975	-	hsa-miR-519a-5p	ACSL4	UTR3	1	530	0.001886792
X	109643970	G>T	UCEC	109643969	109643975	-	hsa-miR-526a	ACSL4	UTR3	1	530	0.001886792
X	109643970	G>T	UCEC	109643969	109643975	-	hsa-miR-519c-5p	ACSL4	UTR3	1	530	0.001886792
X	109643970	G>T	UCEC	109643969	109643975	-	hsa-miR-523-5p	ACSL4	UTR3	1	530	0.001886792
X	109643970	G>T	UCEC	109643969	109643975	-	hsa-miR-520c-5p	ACSL4	UTR3	1	530	0.001886792
X	109643970	G>T	UCEC	109643969	109643975	-	hsa-miR-518e-5p	ACSL4	UTR3	1	530	0.001886792
X	124378091	G>A	UCEC	124378086	124378092	-	hsa-miR-519c-3p	TENM1	UTR3	1	530	0.001886792
X	124378091	G>A	UCEC	124378086	124378091	-	hsa-miR-520a-3p	TENM1	UTR3	1	530	0.001886792
X	124378091	G>A	UCEC	124378085	124378091	-	hsa-miR-93-5p	TENM1	UTR3	1	530	0.001886792
X	124378091	G>A	UCEC	124378086	124378091	-	hsa-miR-520b	TENM1	UTR3	1	530	0.001886792
X	124378091	G>A	UCEC	124378087	124378092	-	hsa-miR-130a-3p	TENM1	UTR3	1	530	0.001886792
X	124378091	G>A	UCEC	124378085	124378091	-	hsa-miR-20b-5p	TENM1	UTR3	1	530	0.001886792
X	124378091	G>A	UCEC	124378086	124378092	-	hsa-miR-519a-3p	TENM1	UTR3	1	530	0.001886792
X	124378091	G>A	UCEC	124378087	124378092	-	hsa-miR-301a-3p	TENM1	UTR3	1	530	0.001886792
X	124378091	G>A	UCEC	124378086	124378091	-	hsa-miR-520d-3p	TENM1	UTR3	1	530	0.001886792
X	124378091	G>A	UCEC	124378086	124378092	-	hsa-miR-4295	TENM1	UTR3	1	530	0.001886792
X	124378091	G>A	UCEC	124378086	124378092	-	hsa-miR-3666	TENM1	UTR3	1	530	0.001886792
X	124378091	G>A	UCEC	124378085	124378091	-	hsa-miR-106b-5p	TENM1	UTR3	1	530	0.001886792
X	124378091	G>A	UCEC	124378086	124378091	-	hsa-miR-520e	TENM1	UTR3	1	530	0.001886792
X	124378091	G>A	UCEC	124378087	124378092	-	hsa-miR-301b-3p	TENM1	UTR3	1	530	0.001886792
X	124378091	G>A	UCEC	124378085	124378091	-	hsa-miR-526b-3p	TENM1	UTR3	1	530	0.001886792
X	124378091	G>A	UCEC	124378087	124378092	-	hsa-miR-130b-3p	TENM1	UTR3	1	530	0.001886792
X	124378091	G>A	UCEC	124378086	124378091	-	hsa-miR-302d-3p	TENM1	UTR3	1	530	0.001886792
X	124378091	G>A	UCEC	124378086	124378091	-	hsa-miR-302c-3p	TENM1	UTR3	1	530	0.001886792
X	124378091	G>A	UCEC	124378086	124378091	-	hsa-miR-302b-3p	TENM1	UTR3	1	530	0.001886792
X	124378091	G>A	UCEC	124378086	124378091	-	hsa-miR-520c-3p	TENM1	UTR3	1	530	0.001886792
X	124378091	G>A	UCEC	124378086	124378091	-	hsa-miR-302a-3p	TENM1	UTR3	1	530	0.001886792
X	124378091	G>A	UCEC	124378085	124378091	-	hsa-miR-519d-3p	TENM1	UTR3	1	530	0.001886792
X	124378091	G>A	UCEC	124378087	124378092	-	hsa-miR-454-3p	TENM1	UTR3	1	530	0.001886792
X	124378091	G>A	UCEC	124378086	124378091	-	hsa-miR-302e	TENM1	UTR3	1	530	0.001886792
X	124378091	G>A	UCEC	124378086	124378092	-	hsa-miR-519b-3p	TENM1	UTR3	1	530	0.001886792
X	124378091	G>A	UCEC	124378089	124378094	-	hsa-miR-33a-5p	TENM1	UTR3	1	530	0.001886792
X	124378091	G>A	UCEC	124378086	124378091	-	hsa-miR-373-3p	TENM1	UTR3	1	530	0.001886792
X	124378091	G>A	UCEC	124378086	124378091	-	hsa-miR-372-3p	TENM1	UTR3	1	530	0.001886792
X	124378091	G>A	UCEC	124378089	124378094	-	hsa-miR-33b-5p	TENM1	UTR3	1	530	0.001886792
X	124378879	C>A	UCEC	124378876	124378881	-	hsa-miR-186-5p	TENM1	UTR3	1	530	0.001886792
X	124378960	C>T	UCEC	124378959	124378965	-	hsa-miR-24-3p	TENM1	UTR3	1	530	0.001886792
X	124378960	C>T	UCEC	124378957	124378963	-	hsa-miR-149-5p	TENM1	UTR3	1	530	0.001886792
X	124378965	C>A	UCEC	124378959	124378965	-	hsa-miR-24-3p	TENM1	UTR3	1	530	0.001886792
X	124379985	C>A	UCEC	124379981	124380009	-	hsa-miR-766-5p	TENM1	UTR3	1	530	0.001886792
X	124380301	G>T	UCEC	124380278	124380306	-	hsa-miR-452-5p	TENM1	UTR3	2	530	0.003773585
X	124380301	G>T	UCEC	124380278	124380306	-	hsa-miR-4676-3p	TENM1	UTR3	2	530	0.003773585
X	124380344	G>T	UCEC	124380341	124380348	-	hsa-miR-216b-5p	TENM1	UTR3	1	530	0.001886792
X	124380344	G>T	UCEC	124380341	124380346	-	hsa-miR-216a-5p	TENM1	UTR3	1	530	0.001886792
X	124380351	T>G	UCEC	124380349	124380354	-	hsa-miR-579-3p	TENM1	UTR3	1	530	0.001886792
X	124380351	T>G	UCEC	124380348	124380353	-	hsa-miR-616-3p	TENM1	UTR3	1	530	0.001886792
X	124380351	T>G	UCEC	124380348	124380376	-	hsa-miR-664b-3p	TENM1	UTR3	1	530	0.001886792
X	124380360	T>G	UCEC	124380358	124380363	-	hsa-miR-1276	TENM1	UTR3	1	530	0.001886792
X	124380360	T>G	UCEC	124380348	124380376	-	hsa-miR-664b-3p	TENM1	UTR3	1	530	0.001886792
X	124380361	C>A	UCEC	124380358	124380363	-	hsa-miR-1276	TENM1	UTR3	1	530	0.001886792
X	124380361	C>A	UCEC	124380348	124380376	-	hsa-miR-664b-3p	TENM1	UTR3	1	530	0.001886792
X	31119256	T>C	UCEC	31119256	31119284	-	hsa-miR-3681-3p	DMD	UTR3	1	530	0.001886792
X	31119566	T>G	UCEC	31119561	31119566	-	hsa-miR-513c-5p	DMD	UTR3	1	530	0.001886792
X	31119566	T>G	UCEC	31119547	31119569	-	hsa-miR-107	DMD	UTR3	1	530	0.001886792
X	31119566	T>G	UCEC	31119547	31119569	-	hsa-miR-103a-3p	DMD	UTR3	1	530	0.001886792
X	31119915	C>T	UCEC	31119888	31119916	-	hsa-miR-5590-3p	DMD	UTR3	1	530	0.001886792
X	31119915	C>T	UCEC	31119888	31119916	-	hsa-miR-142-5p	DMD	UTR3	1	530	0.001886792
X	31119915	C>T	UCEC	31119897	31119925	-	hsa-miR-186-5p	DMD	UTR3	1	530	0.001886792
X	31119997	C>A	UCEC	31119994	31119999	-	hsa-miR-580-3p	DMD	UTR3	1	530	0.001886792
X	31119997	C>A	UCEC	31119973	31120001	-	hsa-miR-526b-3p	DMD	UTR3	1	530	0.001886792
X	31120134	->GT	UCEC	31120131	31120136	-	hsa-miR-944	DMD	UTR3	1	530	0.001886792
X	31120136	->TC	UCEC	31120131	31120136	-	hsa-miR-944	DMD	UTR3	1	530	0.001886792
X	31120951	T>-	UCEC	31120935	31120963	-	hsa-miR-130a-5p	DMD	UTR3	1	530	0.001886792
X	31121358	->T	UCEC	31121355	31121360	-	hsa-miR-186-5p	DMD	UTR3	1	530	0.001886792
X	31121396	C>A	UCEC	31121390	31121418	-	hsa-miR-548o-3p	DMD	UTR3	1	530	0.001886792
X	31121524	G>T	UCEC	31121500	31121528	-	hsa-miR-9-3p	DMD	UTR3	1	530	0.001886792
X	31121524	G>T	UCEC	31121499	31121527	-	hsa-miR-5590-3p	DMD	UTR3	1	530	0.001886792
X	31121688	C>A	UCEC	31121686	31121692	-	hsa-miR-499b-5p	DMD	UTR3	1	530	0.001886792
X	31121744	C>A	UCEC	31121737	31121765	-	hsa-miR-1277-5p	DMD	UTR3	1	530	0.001886792
X	31121751	A>C	UCEC	31121737	31121765	-	hsa-miR-1277-5p	DMD	UTR3	1	530	0.001886792
X	31121764	A>C	UCEC	31121755	31121783	-	hsa-miR-30a-5p	DMD	UTR3	1	530	0.001886792
X	31121764	A>C	UCEC	31121755	31121783	-	hsa-miR-30d-5p	DMD	UTR3	1	530	0.001886792
X	31121764	A>C	UCEC	31121737	31121765	-	hsa-miR-1277-5p	DMD	UTR3	1	530	0.001886792
X	31121764	A>C	UCEC	31121755	31121783	-	hsa-miR-30c-5p	DMD	UTR3	1	530	0.001886792
X	31121764	A>C	UCEC	31121755	31121783	-	hsa-miR-30e-5p	DMD	UTR3	1	530	0.001886792
X	31121764	A>C	UCEC	31121755	31121783	-	hsa-miR-30b-5p	DMD	UTR3	1	530	0.001886792
X	31121809	G>A	UCEC	31121796	31121824	-	hsa-miR-3163	DMD	UTR3	1	530	0.001886792
X	41232559	G>A	UCEC	41232532	41232560	+	hsa-miR-3681-3p	USP9X	UTR3	1	530	0.001886792
X	41232559	G>A	UCEC	41232543	41232571	+	hsa-miR-3142	USP9X	UTR3	1	530	0.001886792
X	41232559	G>A	UCEC	41232554	41232559	+	hsa-miR-128-3p	USP9X	UTR3	1	530	0.001886792
X	41232567	G>A	UCEC	41232567	41232595	+	hsa-miR-642b-3p	USP9X	UTR3	1	530	0.001886792
X	41232567	G>A	UCEC	41232567	41232595	+	hsa-miR-642a-3p	USP9X	UTR3	1	530	0.001886792
X	41232567	G>A	UCEC	41232543	41232571	+	hsa-miR-3142	USP9X	UTR3	1	530	0.001886792
X	41232572	->CATTGCTCATAGCAAAATTGACTC	UCEC	41232567	41232595	+	hsa-miR-642b-3p	USP9X	UTR3	1	530	0.001886792
X	41232572	->CATTGCTCATAGCAAAATTGACTC	UCEC	41232567	41232595	+	hsa-miR-642a-3p	USP9X	UTR3	1	530	0.001886792
X	41232574	->TT	UCEC	41232567	41232595	+	hsa-miR-642b-3p	USP9X	UTR3	1	530	0.001886792
X	41232574	->TT	UCEC	41232573	41232579	+	hsa-miR-1269a	USP9X	UTR3	1	530	0.001886792
X	41232574	->TT	UCEC	41232573	41232601	+	hsa-miR-4662a-5p	USP9X	UTR3	1	530	0.001886792
X	41232574	->TT	UCEC	41232567	41232595	+	hsa-miR-642a-3p	USP9X	UTR3	1	530	0.001886792
X	41232574	->TT	UCEC	41232573	41232579	+	hsa-miR-1269b	USP9X	UTR3	1	530	0.001886792
X	41232575	->CTCATAGCAAAATTGAC	UCEC	41232567	41232595	+	hsa-miR-642b-3p	USP9X	UTR3	1	530	0.001886792
X	41232575	->CTCATAGCAAAATTGAC	UCEC	41232573	41232579	+	hsa-miR-1269a	USP9X	UTR3	1	530	0.001886792
X	41232575	->CTCATAGCAAAATTGAC	UCEC	41232573	41232601	+	hsa-miR-4662a-5p	USP9X	UTR3	1	530	0.001886792
X	41232575	->CTCATAGCAAAATTGAC	UCEC	41232567	41232595	+	hsa-miR-642a-3p	USP9X	UTR3	1	530	0.001886792
X	41232575	->CTCATAGCAAAATTGAC	UCEC	41232573	41232579	+	hsa-miR-1269b	USP9X	UTR3	1	530	0.001886792
X	41232632	->TGGTCTG	UCEC	41232630	41232635	+	hsa-miR-653-5p	USP9X	UTR3	1	530	0.001886792
X	41232639	->TGGGCTCTGTTTTGTTGCT	UCEC	41232637	41232642	+	hsa-miR-483-3p	USP9X	UTR3	1	530	0.001886792
X	41232639	->TGGGCTCTGTTTTGTTGCT	UCEC	41232639	41232644	+	hsa-miR-6509-3p	USP9X	UTR3	1	530	0.001886792
X	41232639	->TGGGCTCTGTTTTGTTGCT	UCEC	41232635	41232640	+	hsa-miR-136-5p	USP9X	UTR3	1	530	0.001886792
X	41232674	T>G	UCEC	41232674	41232680	+	hsa-miR-545-3p	USP9X	UTR3	1	530	0.001886792
X	41232674	T>G	UCEC	41232674	41232680	+	hsa-miR-545-3p	USP9X	UTR3	1	530	0.001886792
X	41232674	->GTATACTCTTATTC	UCEC	41232674	41232680	+	hsa-miR-545-3p	USP9X	UTR3	1	530	0.001886792
X	41232674	->GTATACTCTTATTC	UCEC	41232674	41232680	+	hsa-miR-545-3p	USP9X	UTR3	1	530	0.001886792
X	41232781	T>C	UCEC	41232780	41232785	+	hsa-miR-505-3p	USP9X	UTR3	1	530	0.001886792
X	41232781	T>C	UCEC	41232776	41232781	+	hsa-miR-323a-3p	USP9X	UTR3	1	530	0.001886792
X	41232781	T>C	UCEC	41232777	41232782	+	hsa-miR-543	USP9X	UTR3	1	530	0.001886792
X	41232781	T>C	UCEC	41232779	41232784	+	hsa-miR-421	USP9X	UTR3	1	530	0.001886792
X	41234131	A>G	UCEC	41234130	41234136	+	hsa-miR-134-5p	USP9X	UTR3	1	530	0.001886792
X	41234977	T>G	UCEC	41234972	41234977	+	hsa-miR-216b-5p	USP9X	UTR3	1	530	0.001886792
X	41234977	T>G	UCEC	41234972	41234977	+	hsa-miR-216a-5p	USP9X	UTR3	1	530	0.001886792
X	41234977	T>G	UCEC	41234976	41234981	+	hsa-miR-340-5p	USP9X	UTR3	1	530	0.001886792
X	41234977	T>G	UCEC	41234977	41234982	+	hsa-miR-410-3p	USP9X	UTR3	1	530	0.001886792
X	41234985	T>G	UCEC	41234985	41234990	+	hsa-miR-873-5p	USP9X	UTR3	1	530	0.001886792
X	41235846	C>T	UCEC	41235841	41235846	+	hsa-miR-1185-5p	USP9X	UTR3	1	530	0.001886792
X	41235846	C>T	UCEC	41235842	41235847	+	hsa-miR-151a-5p	USP9X	UTR3	1	530	0.001886792
X	41235847	G>A	UCEC	41235842	41235847	+	hsa-miR-151a-5p	USP9X	UTR3	1	530	0.001886792
X	53532920	->AT	UCEC	53532920	53532926	-	hsa-miR-1277-5p	HUWE1	UTR3	2	530	0.003773585
X	53532922	A>T	UCEC	53532920	53532926	-	hsa-miR-1277-5p	HUWE1	UTR3	1	530	0.001886792
X	53532971	C>T	UCEC	53532970	53532975	-	hsa-miR-5047	HUWE1	UTR3	1	530	0.001886792
X	53532971	C>T	UCEC	53532971	53532976	-	hsa-miR-107	HUWE1	UTR3	1	530	0.001886792
X	53532971	C>T	UCEC	53532971	53532976	-	hsa-miR-103a-3p	HUWE1	UTR3	1	530	0.001886792
X	53532971	C>T	UCEC	53532970	53532975	-	hsa-miR-1301-3p	HUWE1	UTR3	1	530	0.001886792
X	53533076	C>A	UCEC	53533071	53533076	-	hsa-miR-654-5p	HUWE1	UTR3	1	530	0.001886792
X	53533076	C>A	UCEC	53533071	53533076	-	hsa-miR-541-3p	HUWE1	UTR3	1	530	0.001886792
X	53533076	C>A	UCEC	53533072	53533078	-	hsa-miR-491-5p	HUWE1	UTR3	1	530	0.001886792
X	53533156	C>T	UCEC	53533156	53533162	-	hsa-miR-4731-5p	HUWE1	UTR3	1	530	0.001886792
X	71142398	T>G	UCEC	71142397	71142402	+	hsa-miR-340-5p	MED12	UTR3	1	530	0.001886792
X	71142398	T>G	UCEC	71142398	71142403	+	hsa-miR-410-3p	MED12	UTR3	1	530	0.001886792
X	71142424	A>G	UCEC	71142420	71142425	+	hsa-miR-19b-3p	MED12	UTR3	1	530	0.001886792
X	71142424	A>G	UCEC	71142420	71142425	+	hsa-miR-19a-3p	MED12	UTR3	1	530	0.001886792
X	71464215	->TCCCCAGGG	UCEC	71464212	71464217	+	hsa-miR-651-5p	TAF1	UTR3	1	530	0.001886792
X	74734190	G>A	UCEC	74734190	74734218	-	hsa-miR-3140-3p	NEXMIF	UTR3	1	530	0.001886792
X	74734243	T>G	UCEC	74734243	74734248	-	hsa-miR-522-3p	NEXMIF	UTR3	1	530	0.001886792
X	74734243	T>G	UCEC	74734243	74734248	-	hsa-miR-224-3p	NEXMIF	UTR3	1	530	0.001886792
X	74734275	T>G	UCEC	74734263	74734291	-	hsa-miR-374b-3p	NEXMIF	UTR3	1	530	0.001886792
X	74734275	T>G	UCEC	74734254	74734282	-	hsa-miR-664b-3p	NEXMIF	UTR3	1	530	0.001886792
X	74734284	G>T	UCEC	74734263	74734291	-	hsa-miR-374b-3p	NEXMIF	UTR3	1	530	0.001886792
X	74735090	T>G	UCEC	74735090	74735096	-	hsa-miR-495-3p	NEXMIF	UTR3	1	530	0.001886792
X	74735090	T>G	UCEC	74735089	74735117	-	hsa-miR-5688	NEXMIF	UTR3	1	530	0.001886792
X	74735091	T>C	UCEC	74735090	74735096	-	hsa-miR-495-3p	NEXMIF	UTR3	1	530	0.001886792
X	74735091	T>C	UCEC	74735089	74735117	-	hsa-miR-5688	NEXMIF	UTR3	1	530	0.001886792
X	74735684	C>T	UCEC	74735671	74735699	-	hsa-miR-143-3p	NEXMIF	UTR3	1	530	0.001886792
X	74735684	C>T	UCEC	74735671	74735699	-	hsa-miR-4770	NEXMIF	UTR3	1	530	0.001886792
X	74736675	T>G	UCEC	74736670	74736675	-	hsa-miR-656-3p	NEXMIF	UTR3	1	530	0.001886792
X	74736905	C>T	UCEC	74736901	74736906	-	hsa-miR-28-5p	NEXMIF	UTR3	1	530	0.001886792
X	74736905	C>T	UCEC	74736901	74736906	-	hsa-miR-708-5p	NEXMIF	UTR3	1	530	0.001886792
X	74736915	C>A	UCEC	74736912	74736918	-	hsa-miR-186-5p	NEXMIF	UTR3	1	530	0.001886792
X	74736915	C>A	UCEC	74736909	74736915	-	hsa-miR-4766-5p	NEXMIF	UTR3	1	530	0.001886792
X	74736915	C>A	UCEC	74736910	74736915	-	hsa-miR-488-3p	NEXMIF	UTR3	1	530	0.001886792
X	74736958	C>A	UCEC	74736953	74736958	-	hsa-miR-624-3p	NEXMIF	UTR3	1	530	0.001886792
X	74736958	C>A	UCEC	74736940	74736968	-	hsa-miR-4766-3p	NEXMIF	UTR3	1	530	0.001886792
X	74738474	G>T	UCEC	74738472	74738500	-	hsa-miR-664b-3p	NEXMIF	UTR3	1	530	0.001886792
X	74738474	G>T	UCEC	74738472	74738500	-	hsa-miR-579-3p	NEXMIF	UTR3	1	530	0.001886792
X	74738600	C>T	UCEC	74738595	74738600	-	hsa-miR-139-5p	NEXMIF	UTR3	2	530	0.003773585
X	74738600	C>A	UCEC	74738595	74738600	-	hsa-miR-139-5p	NEXMIF	UTR3	2	530	0.003773585
X	77505671	C>A	UCEC	77505667	77505672	-	hsa-miR-455-5p	ATRX	UTR3	1	530	0.001886792
X	77505863	T>G	UCEC	77505859	77505864	-	hsa-miR-1323	ATRX	UTR3	1	530	0.001886792
X	77505863	T>G	UCEC	77505859	77505864	-	hsa-miR-548o-3p	ATRX	UTR3	1	530	0.001886792
X	77505878	C>A	UCEC	77505874	77505879	-	hsa-miR-7-5p	ATRX	UTR3	1	530	0.001886792
X	77506073	C>A	UCEC	77506070	77506075	-	hsa-miR-186-5p	ATRX	UTR3	1	530	0.001886792
X	77506276	A>G	UCEC	77506273	77506279	-	hsa-miR-656-3p	ATRX	UTR3	1	530	0.001886792
X	77506303	C>A	UCEC	77506303	77506308	-	hsa-miR-574-5p	ATRX	UTR3	1	530	0.001886792
X	77506377	T>G	UCEC	77506357	77506385	-	hsa-miR-576-5p	ATRX	UTR3	1	530	0.001886792
X	77506423	T>G	UCEC	77506418	77506423	-	hsa-miR-5009-3p	ATRX	UTR3	1	530	0.001886792
X	77506591	A>C	UCEC	77506591	77506596	-	hsa-miR-576-5p	ATRX	UTR3	1	530	0.001886792
X	77506591	A>C	UCEC	77506583	77506611	-	hsa-miR-664b-3p	ATRX	UTR3	1	530	0.001886792
X	77506636	T>A	UCEC	77506631	77506636	-	hsa-miR-3200-5p	ATRX	UTR3	1	530	0.001886792
X	77506735	T>A	UCEC	77506730	77506735	-	hsa-miR-513b-5p	ATRX	UTR3	1	530	0.001886792
X	77506758	G>T	UCEC	77506754	77506759	-	hsa-miR-512-3p	ATRX	UTR3	1	530	0.001886792
X	77506758	G>T	UCEC	77506754	77506759	-	hsa-miR-520f-3p	ATRX	UTR3	1	530	0.001886792
X	77507058	A>C	UCEC	77507042	77507070	-	hsa-miR-493-5p	ATRX	UTR3	1	530	0.001886792
X	77507101	C>A	UCEC	77507099	77507104	-	hsa-miR-411-3p	ATRX	UTR3	1	530	0.001886792
X	77507101	C>A	UCEC	77507093	77507121	-	hsa-miR-3163	ATRX	UTR3	1	530	0.001886792
X	77507101	C>A	UCEC	77507099	77507104	-	hsa-miR-379-3p	ATRX	UTR3	1	530	0.001886792
X	77507101	C>A	UCEC	77507099	77507106	-	hsa-miR-380-3p	ATRX	UTR3	1	530	0.001886792
X	77507307	A>C	UCEC	77507307	77507312	-	hsa-miR-513b-5p	ATRX	UTR3	1	530	0.001886792
X	77507321	C>A	UCEC	77507320	77507326	-	hsa-miR-1278	ATRX	UTR3	1	530	0.001886792
X	77507342	T>C	UCEC	77507342	77507347	-	hsa-miR-181d-5p	ATRX	UTR3	1	530	0.001886792
X	77507342	T>C	UCEC	77507342	77507347	-	hsa-miR-181c-5p	ATRX	UTR3	1	530	0.001886792
X	77507342	T>C	UCEC	77507342	77507347	-	hsa-miR-181a-5p	ATRX	UTR3	1	530	0.001886792
X	77507342	T>C	UCEC	77507342	77507347	-	hsa-miR-181b-5p	ATRX	UTR3	1	530	0.001886792
X	77507547	C>T	UCEC	77507545	77507550	-	hsa-miR-517c-3p	ATRX	UTR3	1	530	0.001886792
X	77507547	C>T	UCEC	77507545	77507550	-	hsa-miR-517a-3p	ATRX	UTR3	1	530	0.001886792
X	77507550	G>A	UCEC	77507550	77507556	-	hsa-miR-665	ATRX	UTR3	1	530	0.001886792
X	77507550	G>A	UCEC	77507545	77507550	-	hsa-miR-517c-3p	ATRX	UTR3	1	530	0.001886792
X	77507550	G>A	UCEC	77507545	77507550	-	hsa-miR-517a-3p	ATRX	UTR3	1	530	0.001886792
X	77507652	T>C	UCEC	77507627	77507655	-	hsa-miR-4766-5p	ATRX	UTR3	1	530	0.001886792
X	77507652	T>C	UCEC	77507633	77507661	-	hsa-miR-3163	ATRX	UTR3	1	530	0.001886792
X	77507661	->T	UCEC	77507633	77507661	-	hsa-miR-3163	ATRX	UTR3	1	530	0.001886792
X	77507727	G>C	UCEC	77507727	77507732	-	hsa-miR-942-5p	ATRX	UTR3	1	530	0.001886792
X	77507955	C>T	UCEC	77507949	77507977	-	hsa-miR-147a	ATRX	UTR3	1	530	0.001886792
X	77507970	C>A	UCEC	77507949	77507977	-	hsa-miR-147a	ATRX	UTR3	1	530	0.001886792
X	77507970	C>A	UCEC	77507962	77507990	-	hsa-miR-380-3p	ATRX	UTR3	1	530	0.001886792
X	77507970	C>A	UCEC	77507962	77507990	-	hsa-miR-411-3p	ATRX	UTR3	1	530	0.001886792
X	77507970	C>A	UCEC	77507967	77507973	-	hsa-miR-186-5p	ATRX	UTR3	1	530	0.001886792
X	77507970	C>A	UCEC	77507962	77507990	-	hsa-miR-379-3p	ATRX	UTR3	1	530	0.001886792
X	77507986	G>T	UCEC	77507962	77507990	-	hsa-miR-380-3p	ATRX	UTR3	1	530	0.001886792
X	77507986	G>T	UCEC	77507962	77507990	-	hsa-miR-411-3p	ATRX	UTR3	1	530	0.001886792
X	77507986	G>T	UCEC	77507974	77508002	-	hsa-miR-1277-5p	ATRX	UTR3	1	530	0.001886792
X	77507986	G>T	UCEC	77507962	77507990	-	hsa-miR-379-3p	ATRX	UTR3	1	530	0.001886792
X	77507993	G>T	UCEC	77507974	77508002	-	hsa-miR-1277-5p	ATRX	UTR3	1	530	0.001886792
X	77508283	G>T	UCEC	77508280	77508308	-	hsa-miR-616-3p	ATRX	UTR3	1	530	0.001886792
X	77508296	T>G	UCEC	77508290	77508318	-	hsa-miR-5009-3p	ATRX	UTR3	1	530	0.001886792
X	77508296	T>G	UCEC	77508280	77508308	-	hsa-miR-616-3p	ATRX	UTR3	1	530	0.001886792
X	77508306	C>A	UCEC	77508290	77508318	-	hsa-miR-5009-3p	ATRX	UTR3	2	530	0.003773585
X	77508306	C>A	UCEC	77508299	77508327	-	hsa-miR-3163	ATRX	UTR3	2	530	0.003773585
X	77508306	C>A	UCEC	77508280	77508308	-	hsa-miR-616-3p	ATRX	UTR3	2	530	0.003773585
X	77508319	A>C	UCEC	77508299	77508327	-	hsa-miR-3163	ATRX	UTR3	1	530	0.001886792
X	77508329	G>A	UCEC	77508329	77508334	-	hsa-miR-885-5p	ATRX	UTR3	1	530	0.001886792
X	77508334	T>C	LGG	77508329	77508334	-	hsa-miR-885-5p	ATRX	UTR3	1	508	0.001968504
X	77508349	T>G	LGG	77508343	77508349	-	hsa-miR-19b-3p	ATRX	UTR3	1	508	0.001968504
X	77508349	T>G	LGG	77508343	77508349	-	hsa-miR-19a-3p	ATRX	UTR3	1	508	0.001968504
X	85271908	G>A	UCEC	85271906	85271911	+	hsa-miR-941	ZNF711	UTR3	1	530	0.001886792
X	85271935	G>T	UCEC	85271934	85271939	+	hsa-miR-224-5p	ZNF711	UTR3	1	530	0.001886792
X	85271937	C>A	UCEC	85271934	85271939	+	hsa-miR-224-5p	ZNF711	UTR3	1	530	0.001886792
X	85272029	C>A	UCEC	85272025	85272030	+	hsa-miR-512-3p	ZNF711	UTR3	1	530	0.001886792
X	85272029	C>A	UCEC	85272024	85272030	+	hsa-miR-520f-3p	ZNF711	UTR3	1	530	0.001886792
X	85272118	A>C	UCEC	85272099	85272127	+	hsa-miR-5590-3p	ZNF711	UTR3	1	530	0.001886792
X	85272160	G>A	UCEC	85272146	85272174	+	hsa-miR-3924	ZNF711	UTR3	1	530	0.001886792
X	85272160	G>A	UCEC	85272158	85272163	+	hsa-miR-942-5p	ZNF711	UTR3	1	530	0.001886792
X	85272320	G>T	UCEC	85272316	85272322	+	hsa-miR-616-3p	ZNF711	UTR3	1	530	0.001886792
X	85272330	T>C	UCEC	85272326	85272332	+	hsa-miR-548o-3p	ZNF711	UTR3	1	530	0.001886792
X	85272330	T>C	UCEC	85272326	85272332	+	hsa-miR-1323	ZNF711	UTR3	1	530	0.001886792
X	85272612	C>A	UCEC	85272607	85272613	+	hsa-miR-512-3p	ZNF711	UTR3	1	530	0.001886792
X	85272612	C>A	UCEC	85272591	85272619	+	hsa-miR-1277-5p	ZNF711	UTR3	1	530	0.001886792
X	85272612	C>A	UCEC	85272608	85272613	+	hsa-miR-520f-3p	ZNF711	UTR3	1	530	0.001886792
X	85272672	A>T	UCEC	85272664	85272692	+	hsa-miR-5009-3p	ZNF711	UTR3	1	530	0.001886792
X	85272672	A>T	UCEC	85272670	85272675	+	hsa-miR-323a-3p	ZNF711	UTR3	1	530	0.001886792
X	85272682	T>-	UCEC	85272664	85272692	+	hsa-miR-5009-3p	ZNF711	UTR3	2	530	0.003773585
X	85272686	T>C	UCEC	85272664	85272692	+	hsa-miR-5009-3p	ZNF711	UTR3	1	530	0.001886792
X	85272721	C>A	UCEC	85272719	85272724	+	hsa-miR-208b-3p	ZNF711	UTR3	1	530	0.001886792
X	85272721	C>A	UCEC	85272719	85272724	+	hsa-miR-208a-3p	ZNF711	UTR3	1	530	0.001886792
X	85272721	C>A	UCEC	85272718	85272724	+	hsa-miR-499a-5p	ZNF711	UTR3	1	530	0.001886792
X	85272758	C>A	UCEC	85272740	85272761	+	hsa-miR-183-5p	ZNF711	UTR3	1	530	0.001886792
X	85272817	T>C	UCEC	85272812	85272840	+	hsa-miR-200c-3p	ZNF711	UTR3	1	530	0.001886792
X	85272852	C>T	UCEC	85272852	85272857	+	hsa-miR-214-3p	ZNF711	UTR3	1	530	0.001886792
X	85272946	C>T	UCEC	85272944	85272949	+	hsa-miR-450b-5p	ZNF711	UTR3	1	530	0.001886792
X	85272946	C>T	UCEC	85272941	85272946	+	hsa-miR-103a-3p	ZNF711	UTR3	1	530	0.001886792
X	85272946	C>T	UCEC	85272942	85272947	+	hsa-miR-1301-3p	ZNF711	UTR3	1	530	0.001886792
X	85272946	C>T	UCEC	85272941	85272946	+	hsa-miR-107	ZNF711	UTR3	1	530	0.001886792
X	85272946	C>T	UCEC	85272942	85272948	+	hsa-miR-5047	ZNF711	UTR3	1	530	0.001886792
X	85272983	G>T	UCEC	85272967	85272995	+	hsa-miR-3163	ZNF711	UTR3	1	530	0.001886792
X	85272990	T>G	UCEC	85272967	85272995	+	hsa-miR-3163	ZNF711	UTR3	1	530	0.001886792
X	85273088	G>A	UCEC	85273083	85273111	+	hsa-miR-1277-5p	ZNF711	UTR3	1	530	0.001886792
X	85273093	T>A	UCEC	85273083	85273111	+	hsa-miR-1277-5p	ZNF711	UTR3	1	530	0.001886792
X	85273183	A>T	UCEC	85273164	85273192	+	hsa-miR-3163	ZNF711	UTR3	1	530	0.001886792
X	85273210	A>G	UCEC	85273208	85273213	+	hsa-miR-889-3p	ZNF711	UTR3	1	530	0.001886792
X	85273242	T>G	UCEC	85273237	85273242	+	hsa-miR-362-3p	ZNF711	UTR3	1	530	0.001886792
X	85273242	T>G	UCEC	85273237	85273242	+	hsa-miR-329-3p	ZNF711	UTR3	1	530	0.001886792
X	85273345	A>C	UCEC	85273340	85273360	+	hsa-miR-520c-3p	ZNF711	UTR3	1	530	0.001886792
X	85273345	A>C	UCEC	85273342	85273347	+	hsa-miR-3140-3p	ZNF711	UTR3	1	530	0.001886792
X	85273345	A>C	UCEC	85273339	85273360	+	hsa-miR-373-3p	ZNF711	UTR3	1	530	0.001886792
X	85273345	A>C	UCEC	85273339	85273360	+	hsa-miR-372-3p	ZNF711	UTR3	1	530	0.001886792
X	85273345	A>C	UCEC	85273345	85273360	+	hsa-miR-302e	ZNF711	UTR3	1	530	0.001886792
X	85273345	A>C	UCEC	85273341	85273360	+	hsa-miR-520e	ZNF711	UTR3	1	530	0.001886792
X	85273345	A>C	UCEC	85273340	85273360	+	hsa-miR-520d-3p	ZNF711	UTR3	1	530	0.001886792
X	85273345	A>C	UCEC	85273340	85273360	+	hsa-miR-520a-3p	ZNF711	UTR3	1	530	0.001886792
X	85273345	A>C	UCEC	85273341	85273360	+	hsa-miR-520b	ZNF711	UTR3	1	530	0.001886792
X	85273351	T>G	UCEC	85273340	85273360	+	hsa-miR-520c-3p	ZNF711	UTR3	1	530	0.001886792
X	85273351	T>G	UCEC	85273339	85273360	+	hsa-miR-373-3p	ZNF711	UTR3	1	530	0.001886792
X	85273351	T>G	UCEC	85273339	85273360	+	hsa-miR-372-3p	ZNF711	UTR3	1	530	0.001886792
X	85273351	T>G	UCEC	85273345	85273360	+	hsa-miR-302e	ZNF711	UTR3	1	530	0.001886792
X	85273351	T>G	UCEC	85273341	85273360	+	hsa-miR-520e	ZNF711	UTR3	1	530	0.001886792
X	85273351	T>G	UCEC	85273340	85273360	+	hsa-miR-520d-3p	ZNF711	UTR3	1	530	0.001886792
X	85273351	T>G	UCEC	85273340	85273360	+	hsa-miR-520a-3p	ZNF711	UTR3	1	530	0.001886792
X	85273351	T>G	UCEC	85273341	85273360	+	hsa-miR-520b	ZNF711	UTR3	1	530	0.001886792
