# Supplementary material for: Comprehensive Analysis of Co-Mutations Identifies Cooperating Mechanisms of Tumorigenesis
Source: Cancers (Basel). 2022 Jan 14;14(2):415. doi: 10.3390/cancers14020415 (PMC8774165; doi:10.3390/cancers14020415)
Supplement: Supplementary file 1 [file cancers-14-00415-s001.zip › Supplementary Table S8.csv]

project	pair	pn	adjpn	adjbfpn	gene1	gene2	Type1	Type2
Brain Cancer.csv	TP53_TTN	4446	4434	2664	TP53	TTN	protein_coding	protein_coding
Brain Cancer.csv	PTEN_TP53	3811	3760	1598	PTEN	TP53	protein_coding	protein_coding
Brain Cancer.csv	MUC16_TP53	3509	3415	1394	MUC16	TP53	protein_coding	protein_coding
Brain Cancer.csv	PTEN_TTN	3370	3239	1296	PTEN	TTN	protein_coding	protein_coding
Brain Cancer.csv	MUC16_TTN	3509	3415	1394	MUC16	TTN	protein_coding	protein_coding
Brain Cancer.csv	HMCN1_TTN	3509	3415	1394	HMCN1	TTN	protein_coding	protein_coding
Brain Cancer.csv	TTN_PKHD1	3509	3415	1394	TTN	PKHD1	protein_coding	protein_coding
Breast Cancer.csv	TP53_TTN	4356	4343	1457	TP53	TTN	protein_coding	protein_coding
Breast Cancer.csv	TP53_MUC16	4208	4173	1209	TP53	MUC16	protein_coding	protein_coding
Breast Cancer.csv	MUC16_TTN	3767	3682	883	MUC16	TTN	protein_coding	protein_coding
Colon Colorectal Cancer.csv	TP53_APC	4624	4624	3251	TP53	APC	protein_coding	protein_coding
Colon Colorectal Cancer.csv	TP53_TTN	4624	4624	3251	TP53	TTN	protein_coding	protein_coding
Colon Colorectal Cancer.csv	MUC16_TTN	4624	4624	3251	MUC16	TTN	protein_coding	protein_coding
Colon Colorectal Cancer.csv	TTN_SYNE1	4624	4624	3251	TTN	SYNE1	protein_coding	protein_coding
Colon Colorectal Cancer.csv	APC_MUC16	4556	4554	2679	APC	MUC16	protein_coding	protein_coding
Colon Colorectal Cancer.csv	OBSCN_TTN	4660	4660	3999	OBSCN	TTN	protein_coding	protein_coding
Colon Colorectal Cancer.csv	KRAS_TTN	4624	4624	3251	KRAS	TTN	protein_coding	protein_coding
Colon Colorectal Cancer.csv	MUC16_SYNE1	4446	4438	2203	MUC16	SYNE1	protein_coding	protein_coding
Colon Colorectal Cancer.csv	APC_SYNE1	4513	4506	2411	APC	SYNE1	protein_coding	protein_coding
Colon Colorectal Cancer.csv	APC_KRAS	4513	4506	2411	APC	KRAS	protein_coding	protein_coding
Colon Colorectal Cancer.csv	TTN_ABCA13	4596	4596	2941	TTN	ABCA13	protein_coding	protein_coding
Colon Colorectal Cancer.csv	APC_OBSCN	4556	4554	2679	APC	OBSCN	protein_coding	protein_coding
Colon Colorectal Cancer.csv	TTN_PCLO	4596	4596	2941	TTN	PCLO	protein_coding	protein_coding
Colon Colorectal Cancer.csv	KMT2C_TTN	4556	4554	2679	KMT2C	TTN	protein_coding	protein_coding
Colon Colorectal Cancer.csv	TTN_GPR98	4624	4624	3251	TTN	GPR98	protein_coding	protein_coding
Colon Colorectal Cancer.csv	TTN_DNAH5	4446	4438	2203	TTN	DNAH5	protein_coding	protein_coding
Colon Colorectal Cancer.csv	TP53_MUC16	4204	4173	1771	TP53	MUC16	protein_coding	protein_coding
Colon Colorectal Cancer.csv	APOB_TTN	4446	4438	2203	APOB	TTN	protein_coding	protein_coding
Colon Colorectal Cancer.csv	TTN_CSMD3	3882	3816	1416	TTN	CSMD3	protein_coding	protein_coding
Colon Colorectal Cancer.csv	APC_DNAH5	4344	4326	1972	APC	DNAH5	protein_coding	protein_coding
Colon Colorectal Cancer.csv	APC_KMT2C	4446	4438	2203	APC	KMT2C	protein_coding	protein_coding
Colon Colorectal Cancer.csv	TTN_LRP1B	4556	4554	2679	TTN	LRP1B	protein_coding	protein_coding
Colon Colorectal Cancer.csv	KMT2C_MUC16	4513	4506	2411	KMT2C	MUC16	protein_coding	protein_coding
Colon Colorectal Cancer.csv	TTN_MUC4	4446	4438	2203	TTN	MUC4	protein_coding	protein_coding
Colon Colorectal Cancer.csv	OBSCN_SYNE1	4513	4506	2411	OBSCN	SYNE1	protein_coding	protein_coding
Colon Colorectal Cancer.csv	HMCN1_TTN	4513	4506	2411	HMCN1	TTN	protein_coding	protein_coding
Colon Colorectal Cancer.csv	TTN_CSMD1	4446	4438	2203	TTN	CSMD1	protein_coding	protein_coding
Colon Colorectal Cancer.csv	TTN_DST	4513	4506	2411	TTN	DST	protein_coding	protein_coding
Colon Colorectal Cancer.csv	TTN_FAT3	4344	4326	1972	TTN	FAT3	protein_coding	protein_coding
Colon Colorectal Cancer.csv	TTN_FLG	4446	4438	2203	TTN	FLG	protein_coding	protein_coding
Colon Colorectal Cancer.csv	TTN_FSIP2	4446	4438	2203	TTN	FSIP2	protein_coding	protein_coding
Colon Colorectal Cancer.csv	RYR2_MUC16	4204	4173	1771	RYR2	MUC16	protein_coding	protein_coding
Colon Colorectal Cancer.csv	APC_PCLO	4446	4438	2203	APC	PCLO	protein_coding	protein_coding
Colon Colorectal Cancer.csv	TTN_PKD1	4446	4438	2203	TTN	PKD1	protein_coding	protein_coding
Colon Colorectal Cancer.csv	NEB_TTN	4624	4624	3251	NEB	TTN	protein_coding	protein_coding
Colon Colorectal Cancer.csv	HERC2_TTN	4446	4438	2203	HERC2	TTN	protein_coding	protein_coding
Colon Colorectal Cancer.csv	RYR2_TTN	4204	4173	1771	RYR2	TTN	protein_coding	protein_coding
Colon Colorectal Cancer.csv	TTN_ZFHX4	4513	4506	2411	TTN	ZFHX4	protein_coding	protein_coding
Colon Colorectal Cancer.csv	APC_CSMD3	3692	3615	1271	APC	CSMD3	protein_coding	protein_coding
Colon Colorectal Cancer.csv	TTN_DNAH7	4513	4506	2411	TTN	DNAH7	protein_coding	protein_coding
Colon Colorectal Cancer.csv	APC_FLG	4446	4438	2203	APC	FLG	protein_coding	protein_coding
Colon Colorectal Cancer.csv	TP53_KRAS	4204	4173	1771	TP53	KRAS	protein_coding	protein_coding
Colon Colorectal Cancer.csv	OBSCN_MUC16	4513	4506	2411	OBSCN	MUC16	protein_coding	protein_coding
Colon Colorectal Cancer.csv	TTN_RYR3	4513	4506	2411	TTN	RYR3	protein_coding	protein_coding
Colon Colorectal Cancer.csv	TP53_SYNE1	3692	3615	1271	TP53	SYNE1	protein_coding	protein_coding
Colon Colorectal Cancer.csv	RYR2_SYNE1	4037	3978	1583	RYR2	SYNE1	protein_coding	protein_coding
Colon Colorectal Cancer.csv	TTN_SYNE2	4446	4438	2203	TTN	SYNE2	protein_coding	protein_coding
Colon Colorectal Cancer.csv	MUC16_ABCA13	4204	4173	1771	MUC16	ABCA13	protein_coding	protein_coding
Colon Colorectal Cancer.csv	APC_ABCA13	4344	4326	1972	APC	ABCA13	protein_coding	protein_coding
Colon Colorectal Cancer.csv	TTN_DNAH17	4204	4173	1771	TTN	DNAH17	protein_coding	protein_coding
Colon Colorectal Cancer.csv	TTN_DOPEY2	4446	4438	2203	TTN	DOPEY2	protein_coding	protein_coding
Colon Colorectal Cancer.csv	TTN_EYS	4446	4438	2203	TTN	EYS	protein_coding	protein_coding
Colon Colorectal Cancer.csv	TTN_KMT2D	4446	4438	2203	TTN	KMT2D	protein_coding	protein_coding
Colon Colorectal Cancer.csv	MUC16_LRP1B	4446	4438	2203	MUC16	LRP1B	protein_coding	protein_coding
Colon Colorectal Cancer.csv	APC_LRP1B	4446	4438	2203	APC	LRP1B	protein_coding	protein_coding
Colon Colorectal Cancer.csv	APC_NEB	4596	4596	2941	APC	NEB	protein_coding	protein_coding
Colon Colorectal Cancer.csv	TP53_OBSCN	4204	4173	1771	TP53	OBSCN	protein_coding	protein_coding
Colon Colorectal Cancer.csv	TTN_PCDH15	4556	4554	2679	TTN	PCDH15	protein_coding	protein_coding
Colon Colorectal Cancer.csv	MUC16_PCLO	4344	4326	1972	MUC16	PCLO	protein_coding	protein_coding
Colon Colorectal Cancer.csv	TTN_SACS	4204	4173	1771	TTN	SACS	protein_coding	protein_coding
Colon Colorectal Cancer.csv	TTN_SDK1	4596	4596	2941	TTN	SDK1	protein_coding	protein_coding
Colon Colorectal Cancer.csv	ABCA13_SYNE1	4446	4438	2203	ABCA13	SYNE1	protein_coding	protein_coding
Colon Colorectal Cancer.csv	ZFHX3_TTN	4204	4173	1771	ZFHX3	TTN	protein_coding	protein_coding
Colon Colorectal Cancer.csv	USH2A_TTN	4204	4173	1771	USH2A	TTN	protein_coding	protein_coding
Colon Colorectal Cancer.csv	TTN_AKAP9	4344	4326	1972	TTN	AKAP9	protein_coding	protein_coding
Colon Colorectal Cancer.csv	MUC16_APOB	4037	3978	1583	MUC16	APOB	protein_coding	protein_coding
Colon Colorectal Cancer.csv	MUC16_DST	4344	4326	1972	MUC16	DST	protein_coding	protein_coding
Colon Colorectal Cancer.csv	KMT2C_DST	4344	4326	1972	KMT2C	DST	protein_coding	protein_coding
Colon Colorectal Cancer.csv	OBSCN_DST	4446	4438	2203	OBSCN	DST	protein_coding	protein_coding
Colon Colorectal Cancer.csv	KMT2C_FAT3	4344	4326	1972	KMT2C	FAT3	protein_coding	protein_coding
Colon Colorectal Cancer.csv	MUC16_FAT3	4204	4173	1771	MUC16	FAT3	protein_coding	protein_coding
Colon Colorectal Cancer.csv	TTN_FAT4	4037	3978	1583	TTN	FAT4	protein_coding	protein_coding
Colon Colorectal Cancer.csv	MUC16_FSIP2	4204	4173	1771	MUC16	FSIP2	protein_coding	protein_coding
Colon Colorectal Cancer.csv	TTN_KIAA1549	4344	4326	1972	TTN	KIAA1549	protein_coding	protein_coding
Colon Colorectal Cancer.csv	HERC2_KMT2C	4344	4326	1972	HERC2	KMT2C	protein_coding	protein_coding
Colon Colorectal Cancer.csv	GPR98_LRP1B	4556	4554	2679	GPR98	LRP1B	protein_coding	protein_coding
Colon Colorectal Cancer.csv	HMCN1_MUC16	4344	4326	1972	HMCN1	MUC16	protein_coding	protein_coding
Colon Colorectal Cancer.csv	MUC16_MUC4	4204	4173	1771	MUC16	MUC4	protein_coding	protein_coding
Colon Colorectal Cancer.csv	APC_MUC4	4037	3978	1583	APC	MUC4	protein_coding	protein_coding
Colon Colorectal Cancer.csv	APC_PKD1	4344	4326	1972	APC	PKD1	protein_coding	protein_coding
Colon Colorectal Cancer.csv	OBSCN_RYR3	4513	4506	2411	OBSCN	RYR3	protein_coding	protein_coding
Colon Colorectal Cancer.csv	TTN_STAB1	4037	3978	1583	TTN	STAB1	protein_coding	protein_coding
Colon Colorectal Cancer.csv	KMT2C_SYNE1	4344	4326	1972	KMT2C	SYNE1	protein_coding	protein_coding
Colon Colorectal Cancer.csv	MUC16_SYNE2	4204	4173	1771	MUC16	SYNE2	protein_coding	protein_coding
Colon Colorectal Cancer.csv	APC_USH2A	4037	3978	1583	APC	USH2A	protein_coding	protein_coding
Colon Colorectal Cancer.csv	APC_ZFHX4	4204	4173	1771	APC	ZFHX4	protein_coding	protein_coding
Colon Colorectal Cancer.csv	OBSCN_ABCA13	4446	4438	2203	OBSCN	ABCA13	protein_coding	protein_coding
Colon Colorectal Cancer.csv	MUC16_CSMD1	4037	3978	1583	MUC16	CSMD1	protein_coding	protein_coding
Colon Colorectal Cancer.csv	TTN_DNAH8	4204	4173	1771	TTN	DNAH8	protein_coding	protein_coding
Colon Colorectal Cancer.csv	APC_DST	4344	4326	1972	APC	DST	protein_coding	protein_coding
Colon Colorectal Cancer.csv	TTN_FAT2	4344	4326	1972	TTN	FAT2	protein_coding	protein_coding
Colon Colorectal Cancer.csv	OBSCN_FSIP2	4344	4326	1972	OBSCN	FSIP2	protein_coding	protein_coding
Colon Colorectal Cancer.csv	APC_FSIP2	4204	4173	1771	APC	FSIP2	protein_coding	protein_coding
Colon Colorectal Cancer.csv	OBSCN_GPR98	4596	4596	2941	OBSCN	GPR98	protein_coding	protein_coding
Colon Colorectal Cancer.csv	MUC16_GPR98	4344	4326	1972	MUC16	GPR98	protein_coding	protein_coding
Colon Colorectal Cancer.csv	APC_GPR98	4446	4438	2203	APC	GPR98	protein_coding	protein_coding
Colon Colorectal Cancer.csv	MUC16_KMT2D	4446	4438	2203	MUC16	KMT2D	protein_coding	protein_coding
Colon Colorectal Cancer.csv	OBSCN_KRAS	4513	4506	2411	OBSCN	KRAS	protein_coding	protein_coding
Colon Colorectal Cancer.csv	ZFHX3_MUC16	4037	3978	1583	ZFHX3	MUC16	protein_coding	protein_coding
Colon Colorectal Cancer.csv	KMT2C_OBSCN	4344	4326	1972	KMT2C	OBSCN	protein_coding	protein_coding
Colon Colorectal Cancer.csv	APC_PCDH15	4446	4438	2203	APC	PCDH15	protein_coding	protein_coding
Colon Colorectal Cancer.csv	TP53_PCLO	4204	4173	1771	TP53	PCLO	protein_coding	protein_coding
Colon Colorectal Cancer.csv	APC_RYR2	3882	3816	1416	APC	RYR2	protein_coding	protein_coding
Colon Colorectal Cancer.csv	APC_RYR3	4204	4173	1771	APC	RYR3	protein_coding	protein_coding
Colon Colorectal Cancer.csv	APC_SACS	4037	3978	1583	APC	SACS	protein_coding	protein_coding
Colon Colorectal Cancer.csv	HMCN1_SYNE1	4204	4173	1771	HMCN1	SYNE1	protein_coding	protein_coding
Colon Colorectal Cancer.csv	MUC4_SYNE1	4037	3978	1583	MUC4	SYNE1	protein_coding	protein_coding
Colon Colorectal Cancer.csv	DST_SYNE1	4344	4326	1972	DST	SYNE1	protein_coding	protein_coding
Colon Colorectal Cancer.csv	SYNE2_SYNE1	4204	4173	1771	SYNE2	SYNE1	protein_coding	protein_coding
Colon Colorectal Cancer.csv	FAT3_SYNE1	4204	4173	1771	FAT3	SYNE1	protein_coding	protein_coding
Colon Colorectal Cancer.csv	KRAS_SYNE1	3882	3816	1416	KRAS	SYNE1	protein_coding	protein_coding
Colon Colorectal Cancer.csv	OBSCN_SYNE2	4446	4438	2203	OBSCN	SYNE2	protein_coding	protein_coding
Colon Colorectal Cancer.csv	FAT3_SYNE2	4204	4173	1771	FAT3	SYNE2	protein_coding	protein_coding
Colon Colorectal Cancer.csv	PLEC_TTN	4344	4326	1972	PLEC	TTN	protein_coding	protein_coding
Colon Colorectal Cancer.csv	ACVR2A_TTN	4446	4438	2203	ACVR2A	TTN	protein_coding	protein_coding
Colon Colorectal Cancer.csv	MUC16_ZFHX4	4344	4326	1972	MUC16	ZFHX4	protein_coding	protein_coding
Colon Colorectal Cancer.csv	KMT2C_ZFHX4	4344	4326	1972	KMT2C	ZFHX4	protein_coding	protein_coding
Colon Colorectal Cancer.csv	OBSCN_ZFHX4	4344	4326	1972	OBSCN	ZFHX4	protein_coding	protein_coding
Colon Colorectal Cancer.csv	ZFHX3_APC	3882	3816	1416	ZFHX3	APC	protein_coding	protein_coding
Colon Colorectal Cancer.csv	HERC2_APC	3882	3816	1416	HERC2	APC	protein_coding	protein_coding
Colon Colorectal Cancer.csv	APC_APOB	3882	3816	1416	APC	APOB	protein_coding	protein_coding
Colon Colorectal Cancer.csv	OBSCN_CSMD1	4446	4438	2203	OBSCN	CSMD1	protein_coding	protein_coding
Colon Colorectal Cancer.csv	GPR98_CSMD1	4344	4326	1972	GPR98	CSMD1	protein_coding	protein_coding
Colon Colorectal Cancer.csv	TTN_CSMD2	4204	4173	1771	TTN	CSMD2	protein_coding	protein_coding
Colon Colorectal Cancer.csv	OBSCN_CSMD3	3882	3816	1416	OBSCN	CSMD3	protein_coding	protein_coding
Colon Colorectal Cancer.csv	APC_DNAH17	3692	3615	1271	APC	DNAH17	protein_coding	protein_coding
Colon Colorectal Cancer.csv	MUC16_DNAH17	4037	3978	1583	MUC16	DNAH17	protein_coding	protein_coding
Colon Colorectal Cancer.csv	MUC16_DNAH7	4446	4438	2203	MUC16	DNAH7	protein_coding	protein_coding
Colon Colorectal Cancer.csv	TTN_DYNC2H1	3510	3377	1147	TTN	DYNC2H1	protein_coding	protein_coding
Colon Colorectal Cancer.csv	OBSCN_FAT2	4037	3978	1583	OBSCN	FAT2	protein_coding	protein_coding
Colon Colorectal Cancer.csv	OBSCN_FAT3	4204	4173	1771	OBSCN	FAT3	protein_coding	protein_coding
Colon Colorectal Cancer.csv	DST_FAT3	4204	4173	1771	DST	FAT3	protein_coding	protein_coding
Colon Colorectal Cancer.csv	APC_FAT3	4037	3978	1583	APC	FAT3	protein_coding	protein_coding
Colon Colorectal Cancer.csv	APC_FAT4	3692	3615	1271	APC	FAT4	protein_coding	protein_coding
Colon Colorectal Cancer.csv	TTN_FREM2	4204	4173	1771	TTN	FREM2	protein_coding	protein_coding
Colon Colorectal Cancer.csv	DST_FSIP2	4344	4326	1972	DST	FSIP2	protein_coding	protein_coding
Colon Colorectal Cancer.csv	SYNE1_FSIP2	4037	3978	1583	SYNE1	FSIP2	protein_coding	protein_coding
Colon Colorectal Cancer.csv	TTN_GNAS	3882	3816	1416	TTN	GNAS	protein_coding	protein_coding
Colon Colorectal Cancer.csv	APC_HMCN1	4204	4173	1771	APC	HMCN1	protein_coding	protein_coding
Colon Colorectal Cancer.csv	TP53_KMT2C	4204	4173	1771	TP53	KMT2C	protein_coding	protein_coding
Colon Colorectal Cancer.csv	OBSCN_KMT2D	4344	4326	1972	OBSCN	KMT2D	protein_coding	protein_coding
Colon Colorectal Cancer.csv	TTN_LAMA5	4344	4326	1972	TTN	LAMA5	protein_coding	protein_coding
Colon Colorectal Cancer.csv	TTN_LRP1	4446	4438	2203	TTN	LRP1	protein_coding	protein_coding
Colon Colorectal Cancer.csv	KMT2C_LRP1B	4344	4326	1972	KMT2C	LRP1B	protein_coding	protein_coding
Colon Colorectal Cancer.csv	TTN_LRP2	4204	4173	1771	TTN	LRP2	protein_coding	protein_coding
Colon Colorectal Cancer.csv	OBSCN_LRP2	4037	3978	1583	OBSCN	LRP2	protein_coding	protein_coding
Colon Colorectal Cancer.csv	TTN_LRRK2	4037	3978	1583	TTN	LRRK2	protein_coding	protein_coding
Colon Colorectal Cancer.csv	HERC2_MUC16	4204	4173	1771	HERC2	MUC16	protein_coding	protein_coding
Colon Colorectal Cancer.csv	TTN_MYO15A	4204	4173	1771	TTN	MYO15A	protein_coding	protein_coding
Colon Colorectal Cancer.csv	TTN_NCOR2	4037	3978	1583	TTN	NCOR2	protein_coding	protein_coding
Colon Colorectal Cancer.csv	MUC16_NEB	4513	4506	2411	MUC16	NEB	protein_coding	protein_coding
Colon Colorectal Cancer.csv	HERC2_OBSCN	4344	4326	1972	HERC2	OBSCN	protein_coding	protein_coding
Colon Colorectal Cancer.csv	TTN_PCDH10	4344	4326	1972	TTN	PCDH10	protein_coding	protein_coding
Colon Colorectal Cancer.csv	SYNE1_PCLO	4204	4173	1771	SYNE1	PCLO	protein_coding	protein_coding
Colon Colorectal Cancer.csv	TTN_RYR1	4204	4173	1771	TTN	RYR1	protein_coding	protein_coding
Colon Colorectal Cancer.csv	APC_SDK1	4513	4506	2411	APC	SDK1	protein_coding	protein_coding
Colon Colorectal Cancer.csv	MUC16_STAB1	4344	4326	1972	MUC16	STAB1	protein_coding	protein_coding
Colon Colorectal Cancer.csv	APOB_SYNE1	3882	3816	1416	APOB	SYNE1	protein_coding	protein_coding
Colon Colorectal Cancer.csv	PLEC_SYNE1	4204	4173	1771	PLEC	SYNE1	protein_coding	protein_coding
Colon Colorectal Cancer.csv	GPR98_SYNE1	4446	4438	2203	GPR98	SYNE1	protein_coding	protein_coding
Colon Colorectal Cancer.csv	CSMD1_SYNE1	4037	3978	1583	CSMD1	SYNE1	protein_coding	protein_coding
Colon Colorectal Cancer.csv	PCDH15_SYNE1	4446	4438	2203	PCDH15	SYNE1	protein_coding	protein_coding
Colon Colorectal Cancer.csv	DST_SYNE2	4344	4326	1972	DST	SYNE2	protein_coding	protein_coding
Colon Colorectal Cancer.csv	APC_SYNE2	4204	4173	1771	APC	SYNE2	protein_coding	protein_coding
Colon Colorectal Cancer.csv	CSMD1_SYNE2	4204	4173	1771	CSMD1	SYNE2	protein_coding	protein_coding
Colon Colorectal Cancer.csv	COL6A3_TTN	3882	3816	1416	COL6A3	TTN	protein_coding	protein_coding
Colon Colorectal Cancer.csv	CDH23_TTN	4344	4326	1972	CDH23	TTN	protein_coding	protein_coding
Colon Colorectal Cancer.csv	TTN_UBR4	3882	3816	1416	TTN	UBR4	protein_coding	protein_coding
Colon Colorectal Cancer.csv	APOB_ABCA13	4037	3978	1583	APOB	ABCA13	protein_coding	protein_coding
Colon Colorectal Cancer.csv	GPR98_ABCA13	4446	4438	2203	GPR98	ABCA13	protein_coding	protein_coding
Colon Colorectal Cancer.csv	KMT2C_ABCA13	4037	3978	1583	KMT2C	ABCA13	protein_coding	protein_coding
Colon Colorectal Cancer.csv	TTN_ACACB	3692	3615	1271	TTN	ACACB	protein_coding	protein_coding
Colon Colorectal Cancer.csv	APC_AKAP9	4204	4173	1771	APC	AKAP9	protein_coding	protein_coding
Colon Colorectal Cancer.csv	RYR2_APOB	3882	3816	1416	RYR2	APOB	protein_coding	protein_coding
Colon Colorectal Cancer.csv	TTN_BIRC6	3078	2877	962	TTN	BIRC6	protein_coding	protein_coding
Colon Colorectal Cancer.csv	TTN_COL7A1	4037	3978	1583	TTN	COL7A1	protein_coding	protein_coding
Colon Colorectal Cancer.csv	APC_CSMD1	4037	3978	1583	APC	CSMD1	protein_coding	protein_coding
Colon Colorectal Cancer.csv	MUC16_CSMD3	3882	3816	1416	MUC16	CSMD3	protein_coding	protein_coding
Colon Colorectal Cancer.csv	OBSCN_DNAH5	4037	3978	1583	OBSCN	DNAH5	protein_coding	protein_coding
Colon Colorectal Cancer.csv	APC_DNAH7	4204	4173	1771	APC	DNAH7	protein_coding	protein_coding
Colon Colorectal Cancer.csv	APC_DOPEY2	4344	4326	1972	APC	DOPEY2	protein_coding	protein_coding
Colon Colorectal Cancer.csv	HERC2_DST	4037	3978	1583	HERC2	DST	protein_coding	protein_coding
Colon Colorectal Cancer.csv	LRP1B_DST	4344	4326	1972	LRP1B	DST	protein_coding	protein_coding
Colon Colorectal Cancer.csv	ABCA13_DST	4204	4173	1771	ABCA13	DST	protein_coding	protein_coding
Colon Colorectal Cancer.csv	DNAH7_DST	4344	4326	1972	DNAH7	DST	protein_coding	protein_coding
Colon Colorectal Cancer.csv	OBSCN_EYS	4344	4326	1972	OBSCN	EYS	protein_coding	protein_coding
Colon Colorectal Cancer.csv	APC_EYS	4204	4173	1771	APC	EYS	protein_coding	protein_coding
Colon Colorectal Cancer.csv	SYNE1_FAT2	3882	3816	1416	SYNE1	FAT2	protein_coding	protein_coding
Colon Colorectal Cancer.csv	APC_FAT2	3882	3816	1416	APC	FAT2	protein_coding	protein_coding
Colon Colorectal Cancer.csv	APOB_FAT3	3882	3816	1416	APOB	FAT3	protein_coding	protein_coding
Colon Colorectal Cancer.csv	ABCA13_FAT3	4037	3978	1583	ABCA13	FAT3	protein_coding	protein_coding
Colon Colorectal Cancer.csv	ZFHX4_FAT3	3882	3816	1416	ZFHX4	FAT3	protein_coding	protein_coding
Colon Colorectal Cancer.csv	HMCN1_FAT3	3882	3816	1416	HMCN1	FAT3	protein_coding	protein_coding
Colon Colorectal Cancer.csv	MUC4_FAT3	4204	4173	1771	MUC4	FAT3	protein_coding	protein_coding
Colon Colorectal Cancer.csv	FAT3_FAT4	3882	3816	1416	FAT3	FAT4	protein_coding	protein_coding
Colon Colorectal Cancer.csv	MUC16_FAT4	4037	3978	1583	MUC16	FAT4	protein_coding	protein_coding
Colon Colorectal Cancer.csv	TP53_FLG	3882	3816	1416	TP53	FLG	protein_coding	protein_coding
Colon Colorectal Cancer.csv	MUC16_FLG	3882	3816	1416	MUC16	FLG	protein_coding	protein_coding
Colon Colorectal Cancer.csv	CSMD3_FSIP2	3692	3615	1271	CSMD3	FSIP2	protein_coding	protein_coding
Colon Colorectal Cancer.csv	APC_KIAA1549	4204	4173	1771	APC	KIAA1549	protein_coding	protein_coding
Colon Colorectal Cancer.csv	MUC16_KIAA1549	4037	3978	1583	MUC16	KIAA1549	protein_coding	protein_coding
Colon Colorectal Cancer.csv	SYNE1_KMT2D	4204	4173	1771	SYNE1	KMT2D	protein_coding	protein_coding
Colon Colorectal Cancer.csv	TTN_LAMA1	4037	3978	1583	TTN	LAMA1	protein_coding	protein_coding
Colon Colorectal Cancer.csv	MUC16_LRP1	4446	4438	2203	MUC16	LRP1	protein_coding	protein_coding
Colon Colorectal Cancer.csv	OBSCN_LRP1B	4513	4506	2411	OBSCN	LRP1B	protein_coding	protein_coding
Colon Colorectal Cancer.csv	TTN_MDN1	4344	4326	1972	TTN	MDN1	protein_coding	protein_coding
Colon Colorectal Cancer.csv	USH2A_MUC16	3692	3615	1271	USH2A	MUC16	protein_coding	protein_coding
Colon Colorectal Cancer.csv	OBSCN_MUC4	4344	4326	1972	OBSCN	MUC4	protein_coding	protein_coding
Colon Colorectal Cancer.csv	OBSCN_MUC5B	4204	4173	1771	OBSCN	MUC5B	protein_coding	protein_coding
Colon Colorectal Cancer.csv	TTN_MYCBP2	4037	3978	1583	TTN	MYCBP2	protein_coding	protein_coding
Colon Colorectal Cancer.csv	TTN_NAV3	3882	3816	1416	TTN	NAV3	protein_coding	protein_coding
Colon Colorectal Cancer.csv	MUC16_NCOR2	4037	3978	1583	MUC16	NCOR2	protein_coding	protein_coding
Colon Colorectal Cancer.csv	TTN_NRXN1	3692	3615	1271	TTN	NRXN1	protein_coding	protein_coding
Colon Colorectal Cancer.csv	MUC16_PCDH15	1728	1716	889	MUC16	PCDH15	protein_coding	protein_coding
Colon Colorectal Cancer.csv	PCNX_FSIP2	3078	2877	962	PCNX	FSIP2	protein_coding	protein_coding
Colon Colorectal Cancer.csv	CPAMD8_FSIP2	3510	3377	1147	CPAMD8	FSIP2	protein_coding	protein_coding
Colon Colorectal Cancer.csv	TG_FSIP2	3078	2877	962	TG	FSIP2	protein_coding	protein_coding
Colon Colorectal Cancer.csv	CIT_FSIP2	3283	3129	1047	CIT	FSIP2	protein_coding	protein_coding
Colon Colorectal Cancer.csv	NOTCH1_FSIP2	3078	2877	962	NOTCH1	FSIP2	protein_coding	protein_coding
Colon Colorectal Cancer.csv	WDFY3_FSIP2	3078	2877	962	WDFY3	FSIP2	protein_coding	protein_coding
Colon Colorectal Cancer.csv	ZNF536_GNAS	3078	2877	962	ZNF536	GNAS	protein_coding	protein_coding
Colon Colorectal Cancer.csv	ZFHX4_GNAS	3078	2877	962	ZFHX4	GNAS	protein_coding	protein_coding
Colon Colorectal Cancer.csv	LRP1_GNAS	3283	3129	1047	LRP1	GNAS	protein_coding	protein_coding
Colon Colorectal Cancer.csv	BRCA2_GNAS	3078	2877	962	BRCA2	GNAS	protein_coding	protein_coding
Colon Colorectal Cancer.csv	PCDH15_GNAS	3283	3129	1047	PCDH15	GNAS	protein_coding	protein_coding
Colon Colorectal Cancer.csv	DNAH7_GNAS	3283	3129	1047	DNAH7	GNAS	protein_coding	protein_coding
Colon Colorectal Cancer.csv	CIT_GNAS	3078	2877	962	CIT	GNAS	protein_coding	protein_coding
Colon Colorectal Cancer.csv	FREM2_GNAS	3283	3129	1047	FREM2	GNAS	protein_coding	protein_coding
Colon Colorectal Cancer.csv	MACF1_GNAS	3283	3129	1047	MACF1	GNAS	protein_coding	protein_coding
Colon Colorectal Cancer.csv	LRP1B_GNAS	3283	3129	1047	LRP1B	GNAS	protein_coding	protein_coding
Colon Colorectal Cancer.csv	APC_GOLGB1	3283	3129	1047	APC	GOLGB1	protein_coding	protein_coding
Colon Colorectal Cancer.csv	KMT2C_GOLGB1	3283	3129	1047	KMT2C	GOLGB1	protein_coding	protein_coding
Colon Colorectal Cancer.csv	PCDH15_GPR112	3283	3129	1047	PCDH15	GPR112	protein_coding	protein_coding
Colon Colorectal Cancer.csv	PLEC_GPR112	3283	3129	1047	PLEC	GPR112	protein_coding	protein_coding
Colon Colorectal Cancer.csv	DST_GPR112	3283	3129	1047	DST	GPR112	protein_coding	protein_coding
Colon Colorectal Cancer.csv	LRP1B_GPR112	3510	3377	1147	LRP1B	GPR112	protein_coding	protein_coding
Colon Colorectal Cancer.csv	HMCN1_GPR112	3283	3129	1047	HMCN1	GPR112	protein_coding	protein_coding
Colon Colorectal Cancer.csv	NEB_GPR112	3692	3615	1271	NEB	GPR112	protein_coding	protein_coding
Colon Colorectal Cancer.csv	DNAH7_GPR112	3283	3129	1047	DNAH7	GPR112	protein_coding	protein_coding
Colon Colorectal Cancer.csv	TRRAP_GPR112	3283	3129	1047	TRRAP	GPR112	protein_coding	protein_coding
Colon Colorectal Cancer.csv	ZFHX4_GPR112	3078	2877	962	ZFHX4	GPR112	protein_coding	protein_coding
Colon Colorectal Cancer.csv	FAT2_GPR112	3283	3129	1047	FAT2	GPR112	protein_coding	protein_coding
Colon Colorectal Cancer.csv	TTN_GPR179	3283	3129	1047	TTN	GPR179	protein_coding	protein_coding
Colon Colorectal Cancer.csv	ZNF536_GPR98	3692	3615	1271	ZNF536	GPR98	protein_coding	protein_coding
Colon Colorectal Cancer.csv	PRRC2C_GPR98	3510	3377	1147	PRRC2C	GPR98	protein_coding	protein_coding
Colon Colorectal Cancer.csv	PAPPA2_GPR98	3078	2877	962	PAPPA2	GPR98	protein_coding	protein_coding
Colon Colorectal Cancer.csv	MED12L_GPR98	3078	2877	962	MED12L	GPR98	protein_coding	protein_coding
Colon Colorectal Cancer.csv	SRCAP_GPR98	3078	2877	962	SRCAP	GPR98	protein_coding	protein_coding
Colon Colorectal Cancer.csv	SALL3_GPR98	3283	3129	1047	SALL3	GPR98	protein_coding	protein_coding
Colon Colorectal Cancer.csv	BSN_GPR98	3692	3615	1271	BSN	GPR98	protein_coding	protein_coding
Colon Colorectal Cancer.csv	ROBO1_GPR98	3510	3377	1147	ROBO1	GPR98	protein_coding	protein_coding
Colon Colorectal Cancer.csv	TPR_GPR98	3283	3129	1047	TPR	GPR98	protein_coding	protein_coding
Colon Colorectal Cancer.csv	MUC16_GRIK2	3283	3129	1047	MUC16	GRIK2	protein_coding	protein_coding
Colon Colorectal Cancer.csv	SYNE1_GRIK2	3283	3129	1047	SYNE1	GRIK2	protein_coding	protein_coding
Colon Colorectal Cancer.csv	ABCA13_GRIK2	3078	2877	962	ABCA13	GRIK2	protein_coding	protein_coding
Colon Colorectal Cancer.csv	FAT3_GRIK2	3283	3129	1047	FAT3	GRIK2	protein_coding	protein_coding
Colon Colorectal Cancer.csv	SYNE2_GRIK2	3283	3129	1047	SYNE2	GRIK2	protein_coding	protein_coding
Colon Colorectal Cancer.csv	FAT3_GRIN2B	3283	3129	1047	FAT3	GRIN2B	protein_coding	protein_coding
Colon Colorectal Cancer.csv	HMCN1_GRIN2B	3283	3129	1047	HMCN1	GRIN2B	protein_coding	protein_coding
Colon Colorectal Cancer.csv	MUC16_GRIN2B	3283	3129	1047	MUC16	GRIN2B	protein_coding	protein_coding
Colon Colorectal Cancer.csv	KMT2C_GRIN2B	3078	2877	962	KMT2C	GRIN2B	protein_coding	protein_coding
Colon Colorectal Cancer.csv	SYNE2_GRIN2B	3283	3129	1047	SYNE2	GRIN2B	protein_coding	protein_coding
Colon Colorectal Cancer.csv	SYNE1_GRIN2B	3283	3129	1047	SYNE1	GRIN2B	protein_coding	protein_coding
Colon Colorectal Cancer.csv	DNAH17_GRM1	3078	2877	962	DNAH17	GRM1	protein_coding	protein_coding
Colon Colorectal Cancer.csv	STAB1_GRM1	3283	3129	1047	STAB1	GRM1	protein_coding	protein_coding
Colon Colorectal Cancer.csv	SVIL_GRM1	3283	3129	1047	SVIL	GRM1	protein_coding	protein_coding
Colon Colorectal Cancer.csv	LRP2_GRM1	3078	2877	962	LRP2	GRM1	protein_coding	protein_coding
Colon Colorectal Cancer.csv	APC_GRM1	3078	2877	962	APC	GRM1	protein_coding	protein_coding
Colon Colorectal Cancer.csv	LRP1B_GRM1	3510	3377	1147	LRP1B	GRM1	protein_coding	protein_coding
Colon Colorectal Cancer.csv	PKD1_GRM1	3283	3129	1047	PKD1	GRM1	protein_coding	protein_coding
Colon Colorectal Cancer.csv	NEB_GRM1	3510	3377	1147	NEB	GRM1	protein_coding	protein_coding
Colon Colorectal Cancer.csv	ABCA13_GRM1	3283	3129	1047	ABCA13	GRM1	protein_coding	protein_coding
Colon Colorectal Cancer.csv	APC_GRM8	3283	3129	1047	APC	GRM8	protein_coding	protein_coding
Colon Colorectal Cancer.csv	TTN_GRM8	3283	3129	1047	TTN	GRM8	protein_coding	protein_coding
Colon Colorectal Cancer.csv	TTN_GSE1	3078	2877	962	TTN	GSE1	protein_coding	protein_coding
Colon Colorectal Cancer.csv	OBSCN_HDAC4	3510	3377	1147	OBSCN	HDAC4	protein_coding	protein_coding
Colon Colorectal Cancer.csv	MUC16_HDAC4	3510	3377	1147	MUC16	HDAC4	protein_coding	protein_coding
Colon Colorectal Cancer.csv	KMT2C_HECTD4	3510	3377	1147	KMT2C	HECTD4	protein_coding	protein_coding
Colon Colorectal Cancer.csv	APC_HECTD4	3510	3377	1147	APC	HECTD4	protein_coding	protein_coding
Colon Colorectal Cancer.csv	MUC16_HECTD4	3510	3377	1147	MUC16	HECTD4	protein_coding	protein_coding
Colon Colorectal Cancer.csv	HMCN1_HECW1	3078	2877	962	HMCN1	HECW1	protein_coding	protein_coding
Colon Colorectal Cancer.csv	RNF213_HELZ2	3692	3615	1271	RNF213	HELZ2	protein_coding	protein_coding
Colon Colorectal Cancer.csv	APC_HELZ2	3510	3377	1147	APC	HELZ2	protein_coding	protein_coding
Colon Colorectal Cancer.csv	TTN_HERC1	3078	2877	962	TTN	HERC1	protein_coding	protein_coding
Colon Colorectal Cancer.csv	OBSCN_HIVEP2	3283	3129	1047	OBSCN	HIVEP2	protein_coding	protein_coding
Colon Colorectal Cancer.csv	RYR3_HIVEP2	3283	3129	1047	RYR3	HIVEP2	protein_coding	protein_coding
Colon Colorectal Cancer.csv	FSIP2_HIVEP2	3078	2877	962	FSIP2	HIVEP2	protein_coding	protein_coding
Colon Colorectal Cancer.csv	CSMD3_HIVEP2	3078	2877	962	CSMD3	HIVEP2	protein_coding	protein_coding
Colon Colorectal Cancer.csv	GNAS_HIVEP2	3283	3129	1047	GNAS	HIVEP2	protein_coding	protein_coding
Colon Colorectal Cancer.csv	FAT4_HIVEP2	3078	2877	962	FAT4	HIVEP2	protein_coding	protein_coding
Colon Colorectal Cancer.csv	PRRC2C_HMCN1	3078	2877	962	PRRC2C	HMCN1	protein_coding	protein_coding
Colon Colorectal Cancer.csv	CIT_HMCN1	3283	3129	1047	CIT	HMCN1	protein_coding	protein_coding
Colon Colorectal Cancer.csv	APC_HUWE1	3078	2877	962	APC	HUWE1	protein_coding	protein_coding
Colon Colorectal Cancer.csv	PCLO_HUWE1	3078	2877	962	PCLO	HUWE1	protein_coding	protein_coding
Colon Colorectal Cancer.csv	KMT2C_HUWE1	3078	2877	962	KMT2C	HUWE1	protein_coding	protein_coding
Colon Colorectal Cancer.csv	WDFY4_HUWE1	3078	2877	962	WDFY4	HUWE1	protein_coding	protein_coding
Colon Colorectal Cancer.csv	FLG_HUWE1	3078	2877	962	FLG	HUWE1	protein_coding	protein_coding
Colon Colorectal Cancer.csv	ABCA13_IGF2R	3078	2877	962	ABCA13	IGF2R	protein_coding	protein_coding
Colon Colorectal Cancer.csv	APOB_IGF2R	3078	2877	962	APOB	IGF2R	protein_coding	protein_coding
Colon Colorectal Cancer.csv	FAT3_IGF2R	3078	2877	962	FAT3	IGF2R	protein_coding	protein_coding
Colon Colorectal Cancer.csv	MUC16_IGF2R	3078	2877	962	MUC16	IGF2R	protein_coding	protein_coding
Colon Colorectal Cancer.csv	FAT3_IGSF10	3510	3377	1147	FAT3	IGSF10	protein_coding	protein_coding
Colon Colorectal Cancer.csv	WDFY4_IGSF10	3510	3377	1147	WDFY4	IGSF10	protein_coding	protein_coding
Colon Colorectal Cancer.csv	HMCN1_IGSF10	3510	3377	1147	HMCN1	IGSF10	protein_coding	protein_coding
Colon Colorectal Cancer.csv	OBSCN_IGSF10	3692	3615	1271	OBSCN	IGSF10	protein_coding	protein_coding
Colon Colorectal Cancer.csv	DNAH17_IGSF10	3510	3377	1147	DNAH17	IGSF10	protein_coding	protein_coding
Colon Colorectal Cancer.csv	KMT2C_IGSF10	3510	3377	1147	KMT2C	IGSF10	protein_coding	protein_coding
Colon Colorectal Cancer.csv	LAMA1_IGSF10	3692	3615	1271	LAMA1	IGSF10	protein_coding	protein_coding
Colon Colorectal Cancer.csv	APC_IGSF10	3692	3615	1271	APC	IGSF10	protein_coding	protein_coding
Colon Colorectal Cancer.csv	DNAH7_IGSF10	3692	3615	1271	DNAH7	IGSF10	protein_coding	protein_coding
Colon Colorectal Cancer.csv	ABCA13_IGSF10	3510	3377	1147	ABCA13	IGSF10	protein_coding	protein_coding
Colon Colorectal Cancer.csv	APOB_IGSF10	3692	3615	1271	APOB	IGSF10	protein_coding	protein_coding
Colon Colorectal Cancer.csv	GPR98_IGSF10	3692	3615	1271	GPR98	IGSF10	protein_coding	protein_coding
Colon Colorectal Cancer.csv	DST_IGSF10	3510	3377	1147	DST	IGSF10	protein_coding	protein_coding
Colon Colorectal Cancer.csv	MUC5B_IGSF10	3510	3377	1147	MUC5B	IGSF10	protein_coding	protein_coding
Colon Colorectal Cancer.csv	TTN_INSRR	3078	2877	962	TTN	INSRR	protein_coding	protein_coding
Colon Colorectal Cancer.csv	FAT3_IRS1	3078	2877	962	FAT3	IRS1	protein_coding	protein_coding
Colon Colorectal Cancer.csv	RYR2_IRS1	3078	2877	962	RYR2	IRS1	protein_coding	protein_coding
Colon Colorectal Cancer.csv	KMT2C_IRS1	3078	2877	962	KMT2C	IRS1	protein_coding	protein_coding
Colon Colorectal Cancer.csv	ZFHX4_IRS1	3283	3129	1047	ZFHX4	IRS1	protein_coding	protein_coding
Colon Colorectal Cancer.csv	ACVR2A_ITGB4	3692	3615	1271	ACVR2A	ITGB4	protein_coding	protein_coding
Colon Colorectal Cancer.csv	DNAH7_ITGB4	3510	3377	1147	DNAH7	ITGB4	protein_coding	protein_coding
Colon Colorectal Cancer.csv	RNF213_ITGB4	3510	3377	1147	RNF213	ITGB4	protein_coding	protein_coding
Colon Colorectal Cancer.csv	RYR1_ITGB4	3283	3129	1047	RYR1	ITGB4	protein_coding	protein_coding
Colon Colorectal Cancer.csv	TRRAP_ITGB4	3283	3129	1047	TRRAP	ITGB4	protein_coding	protein_coding
Colon Colorectal Cancer.csv	SPEG_ITGB4	3283	3129	1047	SPEG	ITGB4	protein_coding	protein_coding
Colon Colorectal Cancer.csv	FAT2_ITGB4	3283	3129	1047	FAT2	ITGB4	protein_coding	protein_coding
Colon Colorectal Cancer.csv	LRP1_ITGB4	3692	3615	1271	LRP1	ITGB4	protein_coding	protein_coding
Colon Colorectal Cancer.csv	PLEC_ITGB4	3510	3377	1147	PLEC	ITGB4	protein_coding	protein_coding
Colon Colorectal Cancer.csv	FAT4_ITGB4	3510	3377	1147	FAT4	ITGB4	protein_coding	protein_coding
Colon Colorectal Cancer.csv	PCDH10_ITGB4	3510	3377	1147	PCDH10	ITGB4	protein_coding	protein_coding
Colon Colorectal Cancer.csv	APOB_ITGB4	3283	3129	1047	APOB	ITGB4	protein_coding	protein_coding
Colon Colorectal Cancer.csv	FREM2_ITPR3	3078	2877	962	FREM2	ITPR3	protein_coding	protein_coding
Colon Colorectal Cancer.csv	MKI67_ITPR3	3078	2877	962	MKI67	ITPR3	protein_coding	protein_coding
Colon Colorectal Cancer.csv	KMT2C_ITPR3	3078	2877	962	KMT2C	ITPR3	protein_coding	protein_coding
Colon Colorectal Cancer.csv	KMT2D_ITPR3	3078	2877	962	KMT2D	ITPR3	protein_coding	protein_coding
Colon Colorectal Cancer.csv	KIAA1549_JARID2	3283	3129	1047	KIAA1549	JARID2	protein_coding	protein_coding
Colon Colorectal Cancer.csv	MUC4_JARID2	3510	3377	1147	MUC4	JARID2	protein_coding	protein_coding
Colon Colorectal Cancer.csv	LRP1B_JARID2	3692	3615	1271	LRP1B	JARID2	protein_coding	protein_coding
Colon Colorectal Cancer.csv	RYR3_JARID2	3283	3129	1047	RYR3	JARID2	protein_coding	protein_coding
Colon Colorectal Cancer.csv	ABCA13_JARID2	3283	3129	1047	ABCA13	JARID2	protein_coding	protein_coding
Colon Colorectal Cancer.csv	RYR1_JARID2	3510	3377	1147	RYR1	JARID2	protein_coding	protein_coding
Colon Colorectal Cancer.csv	APC_JMJD1C	3078	2877	962	APC	JMJD1C	protein_coding	protein_coding
Colon Colorectal Cancer.csv	MUC16_KIAA0947	3078	2877	962	MUC16	KIAA0947	protein_coding	protein_coding
Colon Colorectal Cancer.csv	LAMA1_KIAA1109	3283	3129	1047	LAMA1	KIAA1109	protein_coding	protein_coding
Colon Colorectal Cancer.csv	PKD1_KIAA1109	3078	2877	962	PKD1	KIAA1109	protein_coding	protein_coding
Colon Colorectal Cancer.csv	MACF1_KIAA1109	3078	2877	962	MACF1	KIAA1109	protein_coding	protein_coding
Colon Colorectal Cancer.csv	NRXN1_KIAA1109	3078	2877	962	NRXN1	KIAA1109	protein_coding	protein_coding
Colon Colorectal Cancer.csv	AKAP9_KIAA1109	3078	2877	962	AKAP9	KIAA1109	protein_coding	protein_coding
Colon Colorectal Cancer.csv	LRP2_KIAA1109	3078	2877	962	LRP2	KIAA1109	protein_coding	protein_coding
Colon Colorectal Cancer.csv	CDH23_KIAA1109	3078	2877	962	CDH23	KIAA1109	protein_coding	protein_coding
Colon Colorectal Cancer.csv	MUC4_KIAA1109	3078	2877	962	MUC4	KIAA1109	protein_coding	protein_coding
Colon Colorectal Cancer.csv	ASCC3_KIAA1109	3078	2877	962	ASCC3	KIAA1109	protein_coding	protein_coding
Colon Colorectal Cancer.csv	FREM2_KIAA1109	3078	2877	962	FREM2	KIAA1109	protein_coding	protein_coding
Colon Colorectal Cancer.csv	LRP1_KIAA1109	3283	3129	1047	LRP1	KIAA1109	protein_coding	protein_coding
Colon Colorectal Cancer.csv	LRP1B_KIAA1109	3510	3377	1147	LRP1B	KIAA1109	protein_coding	protein_coding
Colon Colorectal Cancer.csv	RYR3_KIAA1109	3078	2877	962	RYR3	KIAA1109	protein_coding	protein_coding
Colon Colorectal Cancer.csv	BMPR2_KIAA1109	3283	3129	1047	BMPR2	KIAA1109	protein_coding	protein_coding
Colon Colorectal Cancer.csv	MKI67_KIAA1109	3283	3129	1047	MKI67	KIAA1109	protein_coding	protein_coding
Colon Colorectal Cancer.csv	CACNA1A_KIAA1109	3078	2877	962	CACNA1A	KIAA1109	protein_coding	protein_coding
Colon Colorectal Cancer.csv	SVIL_KIAA1109	3283	3129	1047	SVIL	KIAA1109	protein_coding	protein_coding
Colon Colorectal Cancer.csv	PCDH10_KIAA1109	3078	2877	962	PCDH10	KIAA1109	protein_coding	protein_coding
Colon Colorectal Cancer.csv	SPEG_KIAA1109	3078	2877	962	SPEG	KIAA1109	protein_coding	protein_coding
Colon Colorectal Cancer.csv	PRRC2C_KIAA1109	3078	2877	962	PRRC2C	KIAA1109	protein_coding	protein_coding
Colon Colorectal Cancer.csv	PKD1_KIAA1549	3283	3129	1047	PKD1	KIAA1549	protein_coding	protein_coding
Colon Colorectal Cancer.csv	PCDH10_KIAA1549	3283	3129	1047	PCDH10	KIAA1549	protein_coding	protein_coding
Colon Colorectal Cancer.csv	USP34_KIAA1549	3283	3129	1047	USP34	KIAA1549	protein_coding	protein_coding
Colon Colorectal Cancer.csv	GPR98_KIAA1549	3692	3615	1271	GPR98	KIAA1549	protein_coding	protein_coding
Colon Colorectal Cancer.csv	HMCN1_KIAA1549	3078	2877	962	HMCN1	KIAA1549	protein_coding	protein_coding
Colon Colorectal Cancer.csv	KRAS_KIAA1549	3283	3129	1047	KRAS	KIAA1549	protein_coding	protein_coding
Colon Colorectal Cancer.csv	SPEG_KIAA1549	3510	3377	1147	SPEG	KIAA1549	protein_coding	protein_coding
Colon Colorectal Cancer.csv	DNAH7_KIAA1549	3692	3615	1271	DNAH7	KIAA1549	protein_coding	protein_coding
Colon Colorectal Cancer.csv	LYST_KIAA1549	3078	2877	962	LYST	KIAA1549	protein_coding	protein_coding
Colon Colorectal Cancer.csv	VPS13C_KIAA1549	3078	2877	962	VPS13C	KIAA1549	protein_coding	protein_coding
Colon Colorectal Cancer.csv	LRP1B_KIAA1549	3692	3615	1271	LRP1B	KIAA1549	protein_coding	protein_coding
Colon Colorectal Cancer.csv	KMT2C_KIAA1549L	3283	3129	1047	KMT2C	KIAA1549L	protein_coding	protein_coding
Colon Colorectal Cancer.csv	DNAH17_KIAA1549L	3078	2877	962	DNAH17	KIAA1549L	protein_coding	protein_coding
Colon Colorectal Cancer.csv	HMCN1_KIAA1549L	3078	2877	962	HMCN1	KIAA1549L	protein_coding	protein_coding
Colon Colorectal Cancer.csv	CSMD3_KIAA1549L	3078	2877	962	CSMD3	KIAA1549L	protein_coding	protein_coding
Colon Colorectal Cancer.csv	UNC13C_KIAA1549L	3283	3129	1047	UNC13C	KIAA1549L	protein_coding	protein_coding
Colon Colorectal Cancer.csv	CSMD1_KIAA1549L	3078	2877	962	CSMD1	KIAA1549L	protein_coding	protein_coding
Colon Colorectal Cancer.csv	RYR1_KIAA1549L	3078	2877	962	RYR1	KIAA1549L	protein_coding	protein_coding
Colon Colorectal Cancer.csv	SACS_KIAA1549L	3078	2877	962	SACS	KIAA1549L	protein_coding	protein_coding
Colon Colorectal Cancer.csv	VPS13D_KIAA1549L	3078	2877	962	VPS13D	KIAA1549L	protein_coding	protein_coding
Colon Colorectal Cancer.csv	PCDH15_KIAA1549L	3283	3129	1047	PCDH15	KIAA1549L	protein_coding	protein_coding
Colon Colorectal Cancer.csv	FAT2_KIAA1549L	3078	2877	962	FAT2	KIAA1549L	protein_coding	protein_coding
Colon Colorectal Cancer.csv	GPR98_KIAA1549L	3283	3129	1047	GPR98	KIAA1549L	protein_coding	protein_coding
Colon Colorectal Cancer.csv	ABCA13_KIAA1549L	3078	2877	962	ABCA13	KIAA1549L	protein_coding	protein_coding
Colon Colorectal Cancer.csv	AKAP9_KIAA1549L	3078	2877	962	AKAP9	KIAA1549L	protein_coding	protein_coding
Colon Colorectal Cancer.csv	DST_KIF13B	3283	3129	1047	DST	KIF13B	protein_coding	protein_coding
Colon Colorectal Cancer.csv	PLEC_KIF13B	3078	2877	962	PLEC	KIF13B	protein_coding	protein_coding
Colon Colorectal Cancer.csv	HMCN1_KIF26A	3510	3377	1147	HMCN1	KIF26A	protein_coding	protein_coding
Colon Colorectal Cancer.csv	ZFHX4_KIF26A	3510	3377	1147	ZFHX4	KIF26A	protein_coding	protein_coding
Colon Colorectal Cancer.csv	PCDH10_KIF26A	3692	3615	1271	PCDH10	KIF26A	protein_coding	protein_coding
Colon Colorectal Cancer.csv	RYR3_KIF26A	3692	3615	1271	RYR3	KIF26A	protein_coding	protein_coding
Colon Colorectal Cancer.csv	APC_KIF26A	3510	3377	1147	APC	KIF26A	protein_coding	protein_coding
Colon Colorectal Cancer.csv	SYNE2_KIF26A	3510	3377	1147	SYNE2	KIF26A	protein_coding	protein_coding
Colon Colorectal Cancer.csv	HERC2_KIF26B	3078	2877	962	HERC2	KIF26B	protein_coding	protein_coding
Colon Colorectal Cancer.csv	TENM3_KMT2B	3283	3129	1047	TENM3	KMT2B	protein_coding	protein_coding
Colon Colorectal Cancer.csv	ITGB4_KMT2B	3510	3377	1147	ITGB4	KMT2B	protein_coding	protein_coding
Colon Colorectal Cancer.csv	NOTCH1_KMT2B	3078	2877	962	NOTCH1	KMT2B	protein_coding	protein_coding
Colon Colorectal Cancer.csv	FREM2_KMT2B	3078	2877	962	FREM2	KMT2B	protein_coding	protein_coding
Colon Colorectal Cancer.csv	MYCBP2_KMT2B	3078	2877	962	MYCBP2	KMT2B	protein_coding	protein_coding
Colon Colorectal Cancer.csv	STAB1_KMT2B	3510	3377	1147	STAB1	KMT2B	protein_coding	protein_coding
Colon Colorectal Cancer.csv	MYO15A_KMT2B	3283	3129	1047	MYO15A	KMT2B	protein_coding	protein_coding
Colon Colorectal Cancer.csv	SDK1_KMT2B	3510	3377	1147	SDK1	KMT2B	protein_coding	protein_coding
Colon Colorectal Cancer.csv	APOB_KMT2B	3078	2877	962	APOB	KMT2B	protein_coding	protein_coding
Colon Colorectal Cancer.csv	MLLT4_KMT2B	3078	2877	962	MLLT4	KMT2B	protein_coding	protein_coding
Colon Colorectal Cancer.csv	SVIL_KMT2B	3078	2877	962	SVIL	KMT2B	protein_coding	protein_coding
Colon Colorectal Cancer.csv	TRRAP_KMT2B	3078	2877	962	TRRAP	KMT2B	protein_coding	protein_coding
Colon Colorectal Cancer.csv	DOPEY2_KMT2B	3283	3129	1047	DOPEY2	KMT2B	protein_coding	protein_coding
Colon Colorectal Cancer.csv	LAMA2_KMT2B	3078	2877	962	LAMA2	KMT2B	protein_coding	protein_coding
Colon Colorectal Cancer.csv	MKI67_KMT2B	3283	3129	1047	MKI67	KMT2B	protein_coding	protein_coding
Colon Colorectal Cancer.csv	MUC5B_KMT2B	3283	3129	1047	MUC5B	KMT2B	protein_coding	protein_coding
Colon Colorectal Cancer.csv	EP300_KMT2B	3078	2877	962	EP300	KMT2B	protein_coding	protein_coding
Colon Colorectal Cancer.csv	PCDH15_KMT2B	3283	3129	1047	PCDH15	KMT2B	protein_coding	protein_coding
Colon Colorectal Cancer.csv	EYS_KMT2B	3078	2877	962	EYS	KMT2B	protein_coding	protein_coding
Colon Colorectal Cancer.csv	CDH23_KMT2B	3078	2877	962	CDH23	KMT2B	protein_coding	protein_coding
Colon Colorectal Cancer.csv	DCHS1_KMT2D	3692	3615	1271	DCHS1	KMT2D	protein_coding	protein_coding
Colon Colorectal Cancer.csv	SPTBN5_KMT2D	3078	2877	962	SPTBN5	KMT2D	protein_coding	protein_coding
Colon Colorectal Cancer.csv	PLXNA2_KMT2D	3078	2877	962	PLXNA2	KMT2D	protein_coding	protein_coding
Colon Colorectal Cancer.csv	DNAH1_KMT2D	3078	2877	962	DNAH1	KMT2D	protein_coding	protein_coding
Colon Colorectal Cancer.csv	NAV3_KMT2D	3078	2877	962	NAV3	KMT2D	protein_coding	protein_coding
Colon Colorectal Cancer.csv	DNAH8_KMT2D	3510	3377	1147	DNAH8	KMT2D	protein_coding	protein_coding
Colon Colorectal Cancer.csv	ACACB_KMT2D	3078	2877	962	ACACB	KMT2D	protein_coding	protein_coding
Colon Colorectal Cancer.csv	TPR_KMT2D	3078	2877	962	TPR	KMT2D	protein_coding	protein_coding
Colon Colorectal Cancer.csv	UBR4_KMT2D	3283	3129	1047	UBR4	KMT2D	protein_coding	protein_coding
Colon Colorectal Cancer.csv	LAMA2_KMT2D	1300	1246	509	LAMA2	KMT2D	protein_coding	protein_coding
Colon Colorectal Cancer.csv	GPR98_NBEAL1	3078	2877	962	GPR98	NBEAL1	protein_coding	protein_coding
Colon Colorectal Cancer.csv	CACNA1A_NBEAL1	3283	3129	1047	CACNA1A	NBEAL1	protein_coding	protein_coding
Colon Colorectal Cancer.csv	OBSCN_NBEAL1	3078	2877	962	OBSCN	NBEAL1	protein_coding	protein_coding
Colon Colorectal Cancer.csv	KMT2C_NBEAL1	3078	2877	962	KMT2C	NBEAL1	protein_coding	protein_coding
Colon Colorectal Cancer.csv	DNAH5_NCKAP5	3078	2877	962	DNAH5	NCKAP5	protein_coding	protein_coding
Colon Colorectal Cancer.csv	RYR2_NCKAP5	3283	3129	1047	RYR2	NCKAP5	protein_coding	protein_coding
Colon Colorectal Cancer.csv	USP34_NCKAP5	3078	2877	962	USP34	NCKAP5	protein_coding	protein_coding
Colon Colorectal Cancer.csv	HERC2_NCKAP5	3283	3129	1047	HERC2	NCKAP5	protein_coding	protein_coding
Colon Colorectal Cancer.csv	DNAH7_NCKAP5	3510	3377	1147	DNAH7	NCKAP5	protein_coding	protein_coding
Colon Colorectal Cancer.csv	SYNE2_NCKAP5	3283	3129	1047	SYNE2	NCKAP5	protein_coding	protein_coding
Colon Colorectal Cancer.csv	APOB_NCOR1	3510	3377	1147	APOB	NCOR1	protein_coding	protein_coding
Colon Colorectal Cancer.csv	ABCA13_NCOR1	3510	3377	1147	ABCA13	NCOR1	protein_coding	protein_coding
Colon Colorectal Cancer.csv	MACF1_NCOR1	3283	3129	1047	MACF1	NCOR1	protein_coding	protein_coding
Colon Colorectal Cancer.csv	CSMD1_NCOR1	3283	3129	1047	CSMD1	NCOR1	protein_coding	protein_coding
Colon Colorectal Cancer.csv	OBSCN_NCOR1	3510	3377	1147	OBSCN	NCOR1	protein_coding	protein_coding
Colon Colorectal Cancer.csv	NEB_NCOR1	3692	3615	1271	NEB	NCOR1	protein_coding	protein_coding
Colon Colorectal Cancer.csv	DYNC2H1_NCOR1	3283	3129	1047	DYNC2H1	NCOR1	protein_coding	protein_coding
Colon Colorectal Cancer.csv	WDFY4_NCOR1	3283	3129	1047	WDFY4	NCOR1	protein_coding	protein_coding
Colon Colorectal Cancer.csv	HMCN1_NCOR1	3283	3129	1047	HMCN1	NCOR1	protein_coding	protein_coding
Colon Colorectal Cancer.csv	MUC4_NCOR1	3692	3615	1271	MUC4	NCOR1	protein_coding	protein_coding
Colon Colorectal Cancer.csv	DNAH7_NCOR1	3510	3377	1147	DNAH7	NCOR1	protein_coding	protein_coding
Colon Colorectal Cancer.csv	KIAA1549_NCOR2	3283	3129	1047	KIAA1549	NCOR2	protein_coding	protein_coding
Colon Colorectal Cancer.csv	PLEC_NCOR2	3510	3377	1147	PLEC	NCOR2	protein_coding	protein_coding
Colon Colorectal Cancer.csv	FAT2_NCOR2	3510	3377	1147	FAT2	NCOR2	protein_coding	protein_coding
Colon Colorectal Cancer.csv	BRCA2_NCOR2	3510	3377	1147	BRCA2	NCOR2	protein_coding	protein_coding
Colon Colorectal Cancer.csv	RNF213_NCOR2	3882	3816	1416	RNF213	NCOR2	protein_coding	protein_coding
Colon Colorectal Cancer.csv	FSIP2_NCOR2	3283	3129	1047	FSIP2	NCOR2	protein_coding	protein_coding
Colon Colorectal Cancer.csv	NIPBL_NCOR2	3283	3129	1047	NIPBL	NCOR2	protein_coding	protein_coding
Colon Colorectal Cancer.csv	FAT4_NCOR2	3283	3129	1047	FAT4	NCOR2	protein_coding	protein_coding
Colon Colorectal Cancer.csv	RYR1_NCOR2	3510	3377	1147	RYR1	NCOR2	protein_coding	protein_coding
Colon Colorectal Cancer.csv	RIF1_NCOR2	3510	3377	1147	RIF1	NCOR2	protein_coding	protein_coding
Colon Colorectal Cancer.csv	SDK1_NCOR2	3510	3377	1147	SDK1	NCOR2	protein_coding	protein_coding
Colon Colorectal Cancer.csv	RYR3_NCOR2	3510	3377	1147	RYR3	NCOR2	protein_coding	protein_coding
Colon Colorectal Cancer.csv	EYS_NCOR2	3283	3129	1047	EYS	NCOR2	protein_coding	protein_coding
Colon Colorectal Cancer.csv	DSCAML1_NCOR2	3510	3377	1147	DSCAML1	NCOR2	protein_coding	protein_coding
Colon Colorectal Cancer.csv	AKAP9_NCOR2	3283	3129	1047	AKAP9	NCOR2	protein_coding	protein_coding
Colon Colorectal Cancer.csv	FLG_NCOR2	3078	2877	962	FLG	NCOR2	protein_coding	protein_coding
Colon Colorectal Cancer.csv	VPS13B_NCOR2	3510	3377	1147	VPS13B	NCOR2	protein_coding	protein_coding
Colon Colorectal Cancer.csv	ZFHX3_NEB	3692	3615	1271	ZFHX3	NEB	protein_coding	protein_coding
Colon Colorectal Cancer.csv	NOTCH3_NEB	3510	3377	1147	NOTCH3	NEB	protein_coding	protein_coding
Colon Colorectal Cancer.csv	MUC16_NEFM	3078	2877	962	MUC16	NEFM	protein_coding	protein_coding
Colon Colorectal Cancer.csv	TTN_NF1	3283	3129	1047	TTN	NF1	protein_coding	protein_coding
Colon Colorectal Cancer.csv	PKHD1_NIPBL	3078	2877	962	PKHD1	NIPBL	protein_coding	protein_coding
Colon Colorectal Cancer.csv	DNAH1_NIPBL	3078	2877	962	DNAH1	NIPBL	protein_coding	protein_coding
Colon Colorectal Cancer.csv	SDK1_NIPBL	3283	3129	1047	SDK1	NIPBL	protein_coding	protein_coding
Colon Colorectal Cancer.csv	CACNA1A_NIPBL	3283	3129	1047	CACNA1A	NIPBL	protein_coding	protein_coding
Colon Colorectal Cancer.csv	SVIL_NIPBL	3510	3377	1147	SVIL	NIPBL	protein_coding	protein_coding
Colon Colorectal Cancer.csv	PCDHA13_NIPBL	3283	3129	1047	PCDHA13	NIPBL	protein_coding	protein_coding
Colon Colorectal Cancer.csv	DCHS2_NIPBL	3283	3129	1047	DCHS2	NIPBL	protein_coding	protein_coding
Colon Colorectal Cancer.csv	DYNC2H1_NIPBL	3283	3129	1047	DYNC2H1	NIPBL	protein_coding	protein_coding
Colon Colorectal Cancer.csv	MAP3K4_NIPBL	3078	2877	962	MAP3K4	NIPBL	protein_coding	protein_coding
Colon Colorectal Cancer.csv	KIAA1549_NIPBL	3283	3129	1047	KIAA1549	NIPBL	protein_coding	protein_coding
Colon Colorectal Cancer.csv	PKD1_NIPBL	3283	3129	1047	PKD1	NIPBL	protein_coding	protein_coding
Colon Colorectal Cancer.csv	MUC5B_NIPBL	3283	3129	1047	MUC5B	NIPBL	protein_coding	protein_coding
Colon Colorectal Cancer.csv	PKHD1L1_NIPBL	3283	3129	1047	PKHD1L1	NIPBL	protein_coding	protein_coding
Colon Colorectal Cancer.csv	ANK3_NIPBL	3283	3129	1047	ANK3	NIPBL	protein_coding	protein_coding
Colon Colorectal Cancer.csv	RYR2_NIPBL	3078	2877	962	RYR2	NIPBL	protein_coding	protein_coding
Colon Colorectal Cancer.csv	GNAS_NIPBL	3283	3129	1047	GNAS	NIPBL	protein_coding	protein_coding
Colon Colorectal Cancer.csv	RIF1_NIPBL	3078	2877	962	RIF1	NIPBL	protein_coding	protein_coding
Colon Colorectal Cancer.csv	NEB_NIPBL	3510	3377	1147	NEB	NIPBL	protein_coding	protein_coding
Colon Colorectal Cancer.csv	MACF1_NIPBL	3283	3129	1047	MACF1	NIPBL	protein_coding	protein_coding
Colon Colorectal Cancer.csv	ZFHX4_NIPBL	3283	3129	1047	ZFHX4	NIPBL	protein_coding	protein_coding
Colon Colorectal Cancer.csv	ZFHX3_NIPBL	3283	3129	1047	ZFHX3	NIPBL	protein_coding	protein_coding
Colon Colorectal Cancer.csv	EYS_NIPBL	3283	3129	1047	EYS	NIPBL	protein_coding	protein_coding
Colon Colorectal Cancer.csv	SPEG_NIPBL	3078	2877	962	SPEG	NIPBL	protein_coding	protein_coding
Colon Colorectal Cancer.csv	MED12L_NIPBL	3078	2877	962	MED12L	NIPBL	protein_coding	protein_coding
Colon Colorectal Cancer.csv	BMPR2_NOTCH1	3078	2877	962	BMPR2	NOTCH1	protein_coding	protein_coding
Colon Colorectal Cancer.csv	SYNE2_NOTCH1	3078	2877	962	SYNE2	NOTCH1	protein_coding	protein_coding
Colon Colorectal Cancer.csv	IRS1_NOTCH1	3078	2877	962	IRS1	NOTCH1	protein_coding	protein_coding
Colon Colorectal Cancer.csv	RYR2_NOTCH1	3078	2877	962	RYR2	NOTCH1	protein_coding	protein_coding
Colon Colorectal Cancer.csv	FAT3_NOTCH1	3078	2877	962	FAT3	NOTCH1	protein_coding	protein_coding
Colon Colorectal Cancer.csv	ABCA13_NOTCH1	3078	2877	962	ABCA13	NOTCH1	protein_coding	protein_coding
Colon Colorectal Cancer.csv	HMCN1_NOTCH1	3078	2877	962	HMCN1	NOTCH1	protein_coding	protein_coding
Colon Colorectal Cancer.csv	CDH23_NOTCH3	3283	3129	1047	CDH23	NOTCH3	protein_coding	protein_coding
Colon Colorectal Cancer.csv	ZFHX3_NOTCH3	3078	2877	962	ZFHX3	NOTCH3	protein_coding	protein_coding
Colon Colorectal Cancer.csv	HERC2_NOTCH3	3078	2877	962	HERC2	NOTCH3	protein_coding	protein_coding
Colon Colorectal Cancer.csv	SALL3_NOTCH3	3283	3129	1047	SALL3	NOTCH3	protein_coding	protein_coding
Colon Colorectal Cancer.csv	RYR2_NOTCH3	3078	2877	962	RYR2	NOTCH3	protein_coding	protein_coding
Colon Colorectal Cancer.csv	MUC16_NOTCH4	3078	2877	962	MUC16	NOTCH4	protein_coding	protein_coding
Colon Colorectal Cancer.csv	TTN_NOTCH4	3078	2877	962	TTN	NOTCH4	protein_coding	protein_coding
Colon Colorectal Cancer.csv	FSIP2_NRG1	3283	3129	1047	FSIP2	NRG1	protein_coding	protein_coding
Colon Colorectal Cancer.csv	LRP1B_NRG1	3510	3377	1147	LRP1B	NRG1	protein_coding	protein_coding
Colon Colorectal Cancer.csv	APC_NRG1	3283	3129	1047	APC	NRG1	protein_coding	protein_coding
Colon Colorectal Cancer.csv	APOB_NRXN1	3078	2877	962	APOB	NRXN1	protein_coding	protein_coding
Colon Colorectal Cancer.csv	HERC2_NRXN1	3078	2877	962	HERC2	NRXN1	protein_coding	protein_coding
Colon Colorectal Cancer.csv	NOTCH3_NRXN1	3078	2877	962	NOTCH3	NRXN1	protein_coding	protein_coding
Colon Colorectal Cancer.csv	EIF4G1_NRXN1	3283	3129	1047	EIF4G1	NRXN1	protein_coding	protein_coding
Colon Colorectal Cancer.csv	NEB_NRXN1	3510	3377	1147	NEB	NRXN1	protein_coding	protein_coding
Colon Colorectal Cancer.csv	DNAH5_NRXN1	3078	2877	962	DNAH5	NRXN1	protein_coding	protein_coding
Colon Colorectal Cancer.csv	MUC16_NUP205	3283	3129	1047	MUC16	NUP205	protein_coding	protein_coding
Colon Colorectal Cancer.csv	TTN_NUP205	3283	3129	1047	TTN	NUP205	protein_coding	protein_coding
Colon Colorectal Cancer.csv	PAPPA2_OBSCN	3283	3129	1047	PAPPA2	OBSCN	protein_coding	protein_coding
Colon Colorectal Cancer.csv	PLXNB2_OBSCN	3078	2877	962	PLXNB2	OBSCN	protein_coding	protein_coding
Colon Colorectal Cancer.csv	KMT2C_OTOG	3283	3129	1047	KMT2C	OTOG	protein_coding	protein_coding
Colon Colorectal Cancer.csv	RYR2_OTOG	3078	2877	962	RYR2	OTOG	protein_coding	protein_coding
Colon Colorectal Cancer.csv	OBSCN_OTOG	3078	2877	962	OBSCN	OTOG	protein_coding	protein_coding
Colon Colorectal Cancer.csv	DST_OTOG	3078	2877	962	DST	OTOG	protein_coding	protein_coding
Colon Colorectal Cancer.csv	RYR2_PARD3	3283	3129	1047	RYR2	PARD3	protein_coding	protein_coding
Colon Colorectal Cancer.csv	FAT3_PARD3	3283	3129	1047	FAT3	PARD3	protein_coding	protein_coding
Colon Colorectal Cancer.csv	KMT2D_PARD3	3283	3129	1047	KMT2D	PARD3	protein_coding	protein_coding
Colon Colorectal Cancer.csv	DST_PARD3	3283	3129	1047	DST	PARD3	protein_coding	protein_coding
Colon Colorectal Cancer.csv	FAT4_PARD3	3283	3129	1047	FAT4	PARD3	protein_coding	protein_coding
Colon Colorectal Cancer.csv	OBSCN_PARD3	3283	3129	1047	OBSCN	PARD3	protein_coding	protein_coding
Colon Colorectal Cancer.csv	KMT2C_PARD3	3510	3377	1147	KMT2C	PARD3	protein_coding	protein_coding
Colon Colorectal Cancer.csv	PLEC_PCDH10	3283	3129	1047	PLEC	PCDH10	protein_coding	protein_coding
Colon Colorectal Cancer.csv	C3_PCDH10	3078	2877	962	C3	PCDH10	protein_coding	protein_coding
Colon Colorectal Cancer.csv	CIT_PCDH10	3283	3129	1047	CIT	PCDH10	protein_coding	protein_coding
Colon Colorectal Cancer.csv	CACNA1E_PCDH10	3283	3129	1047	CACNA1E	PCDH10	protein_coding	protein_coding
Colon Colorectal Cancer.csv	PCDH17_PCDH10	3078	2877	962	PCDH17	PCDH10	protein_coding	protein_coding
Colon Colorectal Cancer.csv	KRAS_PCDH10	3078	2877	962	KRAS	PCDH10	protein_coding	protein_coding
Colon Colorectal Cancer.csv	BMPR2_PCDH15	3283	3129	1047	BMPR2	PCDH15	protein_coding	protein_coding
Colon Colorectal Cancer.csv	CSMD2_PCDH15	3692	3615	1271	CSMD2	PCDH15	protein_coding	protein_coding
Colon Colorectal Cancer.csv	WDFY4_PCDH15	3283	3129	1047	WDFY4	PCDH15	protein_coding	protein_coding
Colon Colorectal Cancer.csv	PCDH10_PCDH15	3283	3129	1047	PCDH10	PCDH15	protein_coding	protein_coding
Colon Colorectal Cancer.csv	CIT_PCDH15	3078	2877	962	CIT	PCDH15	protein_coding	protein_coding
Colon Colorectal Cancer.csv	COL6A3_PCDH15	3078	2877	962	COL6A3	PCDH15	protein_coding	protein_coding
Colon Colorectal Cancer.csv	USH2A_PCDH15	3283	3129	1047	USH2A	PCDH15	protein_coding	protein_coding
Colon Colorectal Cancer.csv	APC_PCDH19	3283	3129	1047	APC	PCDH19	protein_coding	protein_coding
Colon Colorectal Cancer.csv	NEB_PCDH19	3283	3129	1047	NEB	PCDH19	protein_coding	protein_coding
Colon Colorectal Cancer.csv	MUC16_PCDH8	3510	3377	1147	MUC16	PCDH8	protein_coding	protein_coding
Colon Colorectal Cancer.csv	HMCN1_PCDHA13	3283	3129	1047	HMCN1	PCDHA13	protein_coding	protein_coding
Colon Colorectal Cancer.csv	MUC4_PCDHA13	3510	3377	1147	MUC4	PCDHA13	protein_coding	protein_coding
Colon Colorectal Cancer.csv	PCDH15_PCDHA13	3283	3129	1047	PCDH15	PCDHA13	protein_coding	protein_coding
Colon Colorectal Cancer.csv	DST_PCDHA13	3283	3129	1047	DST	PCDHA13	protein_coding	protein_coding
Colon Colorectal Cancer.csv	APC_PCDHA13	3078	2877	962	APC	PCDHA13	protein_coding	protein_coding
Colon Colorectal Cancer.csv	SYNE2_PCDHA13	3283	3129	1047	SYNE2	PCDHA13	protein_coding	protein_coding
Colon Colorectal Cancer.csv	FAT4_PCLO	3283	3129	1047	FAT4	PCLO	protein_coding	protein_coding
Colon Colorectal Cancer.csv	TIE1_PCLO	3283	3129	1047	TIE1	PCLO	protein_coding	protein_coding
Colon Colorectal Cancer.csv	ANK2_PCLO	3510	3377	1147	ANK2	PCLO	protein_coding	protein_coding
Colon Colorectal Cancer.csv	RIF1_PCLO	3283	3129	1047	RIF1	PCLO	protein_coding	protein_coding
Colon Colorectal Cancer.csv	DMD_PCLO	3510	3377	1147	DMD	PCLO	protein_coding	protein_coding
Colon Colorectal Cancer.csv	WDFY3_PCLO	3078	2877	962	WDFY3	PCLO	protein_coding	protein_coding
Colon Colorectal Cancer.csv	DIDO1_PCLO	3283	3129	1047	DIDO1	PCLO	protein_coding	protein_coding
Colon Colorectal Cancer.csv	PRKDC_PCLO	3510	3377	1147	PRKDC	PCLO	protein_coding	protein_coding
Colon Colorectal Cancer.csv	NRXN1_PCLO	3283	3129	1047	NRXN1	PCLO	protein_coding	protein_coding
Colon Colorectal Cancer.csv	TCF20_PCLO	3510	3377	1147	TCF20	PCLO	protein_coding	protein_coding
Colon Colorectal Cancer.csv	DOPEY2_PCLO	3283	3129	1047	DOPEY2	PCLO	protein_coding	protein_coding
Colon Colorectal Cancer.csv	ANK3_PCLO	3283	3129	1047	ANK3	PCLO	protein_coding	protein_coding
Colon Colorectal Cancer.csv	ZNF536_PCLO	3283	3129	1047	ZNF536	PCLO	protein_coding	protein_coding
Colon Colorectal Cancer.csv	PLXNA2_PCLO	3078	2877	962	PLXNA2	PCLO	protein_coding	protein_coding
Colon Colorectal Cancer.csv	LPHN3_PCLO	3283	3129	1047	LPHN3	PCLO	protein_coding	protein_coding
Colon Colorectal Cancer.csv	COL6A3_PCLO	3078	2877	962	COL6A3	PCLO	protein_coding	protein_coding
Colon Colorectal Cancer.csv	EP400_PCLO	3078	2877	962	EP400	PCLO	protein_coding	protein_coding
Colon Colorectal Cancer.csv	SPEG_PCLO	3510	3377	1147	SPEG	PCLO	protein_coding	protein_coding
Colon Colorectal Cancer.csv	DNAH7_PCNT	3078	2877	962	DNAH7	PCNT	protein_coding	protein_coding
Colon Colorectal Cancer.csv	MYCBP2_PCNT	3078	2877	962	MYCBP2	PCNT	protein_coding	protein_coding
Colon Colorectal Cancer.csv	PCLO_PCNT	3283	3129	1047	PCLO	PCNT	protein_coding	protein_coding
Colon Colorectal Cancer.csv	MUC4_PCNT	3078	2877	962	MUC4	PCNT	protein_coding	protein_coding
Colon Colorectal Cancer.csv	PCDH15_PCNT	3078	2877	962	PCDH15	PCNT	protein_coding	protein_coding
Colon Colorectal Cancer.csv	HMCN1_PCNX	3078	2877	962	HMCN1	PCNX	protein_coding	protein_coding
Colon Colorectal Cancer.csv	ABCA13_PCNX	3078	2877	962	ABCA13	PCNX	protein_coding	protein_coding
Colon Colorectal Cancer.csv	DST_PCNX	3078	2877	962	DST	PCNX	protein_coding	protein_coding
Colon Colorectal Cancer.csv	KMT2C_PCNX	3283	3129	1047	KMT2C	PCNX	protein_coding	protein_coding
Colon Colorectal Cancer.csv	MUC4_PCSK5	3078	2877	962	MUC4	PCSK5	protein_coding	protein_coding
Colon Colorectal Cancer.csv	OBSCN_PCSK5	3078	2877	962	OBSCN	PCSK5	protein_coding	protein_coding
Colon Colorectal Cancer.csv	MUC16_PDCD11	3078	2877	962	MUC16	PDCD11	protein_coding	protein_coding
Colon Colorectal Cancer.csv	TTN_PDCD11	3078	2877	962	TTN	PDCD11	protein_coding	protein_coding
Colon Colorectal Cancer.csv	AKAP9_PDE4DIP	3510	3377	1147	AKAP9	PDE4DIP	protein_coding	protein_coding
Colon Colorectal Cancer.csv	APOB_PDE4DIP	3692	3615	1271	APOB	PDE4DIP	protein_coding	protein_coding
Colon Colorectal Cancer.csv	DMD_PDE4DIP	3692	3615	1271	DMD	PDE4DIP	protein_coding	protein_coding
Colon Colorectal Cancer.csv	APC_PDE4DIP	3692	3615	1271	APC	PDE4DIP	protein_coding	protein_coding
Colon Colorectal Cancer.csv	LAMA1_PDE4DIP	3692	3615	1271	LAMA1	PDE4DIP	protein_coding	protein_coding
Colon Colorectal Cancer.csv	MUC4_PDE4DIP	3882	3816	1416	MUC4	PDE4DIP	protein_coding	protein_coding
Colon Colorectal Cancer.csv	FAT3_PDE4DIP	3882	3816	1416	FAT3	PDE4DIP	protein_coding	protein_coding
Colon Colorectal Cancer.csv	CSMD1_PDE4DIP	3692	3615	1271	CSMD1	PDE4DIP	protein_coding	protein_coding
Colon Colorectal Cancer.csv	C5orf42_PDE4DIP	3882	3816	1416	C5orf42	PDE4DIP	protein_coding	protein_coding
Colon Colorectal Cancer.csv	NEB_PDE4DIP	3882	3816	1416	NEB	PDE4DIP	protein_coding	protein_coding
Colon Colorectal Cancer.csv	RYR2_PDE4DIP	3882	3816	1416	RYR2	PDE4DIP	protein_coding	protein_coding
Colon Colorectal Cancer.csv	FSIP2_PDE4DIP	3692	3615	1271	FSIP2	PDE4DIP	protein_coding	protein_coding
Colon Colorectal Cancer.csv	ABCA13_PDE4DIP	3692	3615	1271	ABCA13	PDE4DIP	protein_coding	protein_coding
Colon Colorectal Cancer.csv	LRP2_PDE4DIP	3510	3377	1147	LRP2	PDE4DIP	protein_coding	protein_coding
Colon Colorectal Cancer.csv	RNF213_PDE4DIP	4037	3978	1583	RNF213	PDE4DIP	protein_coding	protein_coding
Colon Colorectal Cancer.csv	SYNE2_PDE4DIP	3882	3816	1416	SYNE2	PDE4DIP	protein_coding	protein_coding
Colon Colorectal Cancer.csv	TTN_PDS5B	3078	2877	962	TTN	PDS5B	protein_coding	protein_coding
Colon Colorectal Cancer.csv	SYNE1_PDS5B	3078	2877	962	SYNE1	PDS5B	protein_coding	protein_coding
Colon Colorectal Cancer.csv	MUC16_PDS5B	3078	2877	962	MUC16	PDS5B	protein_coding	protein_coding
Colon Colorectal Cancer.csv	MUC16_PDZD2	3283	3129	1047	MUC16	PDZD2	protein_coding	protein_coding
Colon Colorectal Cancer.csv	APOB_PDZD2	3283	3129	1047	APOB	PDZD2	protein_coding	protein_coding
Colon Colorectal Cancer.csv	KRAS_PDZD2	3510	3377	1147	KRAS	PDZD2	protein_coding	protein_coding
Colon Colorectal Cancer.csv	KMT2C_PEG3	3283	3129	1047	KMT2C	PEG3	protein_coding	protein_coding
Colon Colorectal Cancer.csv	ABCA13_PHF14	3078	2877	962	ABCA13	PHF14	protein_coding	protein_coding
Colon Colorectal Cancer.csv	KMT2C_PHF14	3078	2877	962	KMT2C	PHF14	protein_coding	protein_coding
Colon Colorectal Cancer.csv	TTN_PHF3	3078	2877	962	TTN	PHF3	protein_coding	protein_coding
Colon Colorectal Cancer.csv	DST_PI4KA	3078	2877	962	DST	PI4KA	protein_coding	protein_coding
Colon Colorectal Cancer.csv	OBSCN_PI4KA	3078	2877	962	OBSCN	PI4KA	protein_coding	protein_coding
Colon Colorectal Cancer.csv	TTN_PI4KA	3078	2877	962	TTN	PI4KA	protein_coding	protein_coding
Colon Colorectal Cancer.csv	DNAH17_PIK3CA	3692	3615	1271	DNAH17	PIK3CA	protein_coding	protein_coding
Colon Colorectal Cancer.csv	NEB_PIK3CA	3692	3615	1271	NEB	PIK3CA	protein_coding	protein_coding
Colon Colorectal Cancer.csv	ZFHX3_PIK3CA	3510	3377	1147	ZFHX3	PIK3CA	protein_coding	protein_coding
Colon Colorectal Cancer.csv	FREM2_PIK3CA	3510	3377	1147	FREM2	PIK3CA	protein_coding	protein_coding
Colon Colorectal Cancer.csv	HERC2_PIK3CA	3510	3377	1147	HERC2	PIK3CA	protein_coding	protein_coding
Colon Colorectal Cancer.csv	ACVR2A_PIK3CA	3692	3615	1271	ACVR2A	PIK3CA	protein_coding	protein_coding
Colon Colorectal Cancer.csv	FLG_PIK3CA	3078	2877	962	FLG	PIK3CA	protein_coding	protein_coding
Colon Colorectal Cancer.csv	SPEG_PIK3CA	3283	3129	1047	SPEG	PIK3CA	protein_coding	protein_coding
Colon Colorectal Cancer.csv	RYR1_PIK3CA	3510	3377	1147	RYR1	PIK3CA	protein_coding	protein_coding
Colon Colorectal Cancer.csv	FAT2_PIK3CA	3510	3377	1147	FAT2	PIK3CA	protein_coding	protein_coding
Colon Colorectal Cancer.csv	BRCA2_PKD1	3078	2877	962	BRCA2	PKD1	protein_coding	protein_coding
Colon Colorectal Cancer.csv	KRAS_PKD1	3283	3129	1047	KRAS	PKD1	protein_coding	protein_coding
Colon Colorectal Cancer.csv	PLEC_PKD1	3510	3377	1147	PLEC	PKD1	protein_coding	protein_coding
Colon Colorectal Cancer.csv	MED12L_PKD1	3078	2877	962	MED12L	PKD1	protein_coding	protein_coding
Colon Colorectal Cancer.csv	CACNA1E_PKD1	3283	3129	1047	CACNA1E	PKD1	protein_coding	protein_coding
Colon Colorectal Cancer.csv	NOTCH3_PKD1	3078	2877	962	NOTCH3	PKD1	protein_coding	protein_coding
Colon Colorectal Cancer.csv	CSMD2_PKD1	3510	3377	1147	CSMD2	PKD1	protein_coding	protein_coding
Colon Colorectal Cancer.csv	WDFY4_PKD1	3078	2877	962	WDFY4	PKD1	protein_coding	protein_coding
Colon Colorectal Cancer.csv	CDH23_PKD1	3283	3129	1047	CDH23	PKD1	protein_coding	protein_coding
Colon Colorectal Cancer.csv	PCDH15_PKD1	3692	3615	1271	PCDH15	PKD1	protein_coding	protein_coding
Colon Colorectal Cancer.csv	LYST_PKD1	3078	2877	962	LYST	PKD1	protein_coding	protein_coding
Colon Colorectal Cancer.csv	ZFHX3_PKD1	3510	3377	1147	ZFHX3	PKD1	protein_coding	protein_coding
Colon Colorectal Cancer.csv	USP34_PKD1	3078	2877	962	USP34	PKD1	protein_coding	protein_coding
Colon Colorectal Cancer.csv	WDFY3_PKD1	3078	2877	962	WDFY3	PKD1	protein_coding	protein_coding
Colon Colorectal Cancer.csv	HERC2_PKD1L1	3283	3129	1047	HERC2	PKD1L1	protein_coding	protein_coding
Colon Colorectal Cancer.csv	FAT4_PKD1L1	3283	3129	1047	FAT4	PKD1L1	protein_coding	protein_coding
Colon Colorectal Cancer.csv	FAT3_PKD1L1	3078	2877	962	FAT3	PKD1L1	protein_coding	protein_coding
Colon Colorectal Cancer.csv	HMCN1_PKD1L1	1300	1246	509	HMCN1	PKD1L1	protein_coding	protein_coding
Colon Colorectal Cancer.csv	PAPPA2_SYNE1	3078	2877	962	PAPPA2	SYNE1	protein_coding	protein_coding
Colon Colorectal Cancer.csv	ABCA1_SYNE1	3078	2877	962	ABCA1	SYNE1	protein_coding	protein_coding
Colon Colorectal Cancer.csv	MUC17_SYNE1	3078	2877	962	MUC17	SYNE1	protein_coding	protein_coding
Colon Colorectal Cancer.csv	ROBO1_SYNE1	3078	2877	962	ROBO1	SYNE1	protein_coding	protein_coding
Colon Colorectal Cancer.csv	TENC1_SYNE1	3692	3615	1271	TENC1	SYNE1	protein_coding	protein_coding
Colon Colorectal Cancer.csv	N4BP2_SYNE1	3510	3377	1147	N4BP2	SYNE1	protein_coding	protein_coding
Colon Colorectal Cancer.csv	FBN2_SYNE1	3078	2877	962	FBN2	SYNE1	protein_coding	protein_coding
Colon Colorectal Cancer.csv	NAV1_SYNE1	3283	3129	1047	NAV1	SYNE1	protein_coding	protein_coding
Colon Colorectal Cancer.csv	BSN_SYNE2	3078	2877	962	BSN	SYNE2	protein_coding	protein_coding
Colon Colorectal Cancer.csv	PXDNL_SYNE2	3283	3129	1047	PXDNL	SYNE2	protein_coding	protein_coding
Colon Colorectal Cancer.csv	KRAS_SYNE2	3283	3129	1047	KRAS	SYNE2	protein_coding	protein_coding
Colon Colorectal Cancer.csv	ABCA12_SYNE2	3078	2877	962	ABCA12	SYNE2	protein_coding	protein_coding
Colon Colorectal Cancer.csv	ROBO1_SYNE2	3283	3129	1047	ROBO1	SYNE2	protein_coding	protein_coding
Colon Colorectal Cancer.csv	PAPPA2_SYNE2	3078	2877	962	PAPPA2	SYNE2	protein_coding	protein_coding
Colon Colorectal Cancer.csv	DISP1_SYNE2	3283	3129	1047	DISP1	SYNE2	protein_coding	protein_coding
Colon Colorectal Cancer.csv	DNAH10_SYNE2	3078	2877	962	DNAH10	SYNE2	protein_coding	protein_coding
Colon Colorectal Cancer.csv	MUC2_SYNE2	3078	2877	962	MUC2	SYNE2	protein_coding	protein_coding
Colon Colorectal Cancer.csv	SALL3_SYNE2	3078	2877	962	SALL3	SYNE2	protein_coding	protein_coding
Colon Colorectal Cancer.csv	CIT_SYNE2	3283	3129	1047	CIT	SYNE2	protein_coding	protein_coding
Colon Colorectal Cancer.csv	PCLO_SZT2	3510	3377	1147	PCLO	SZT2	protein_coding	protein_coding
Colon Colorectal Cancer.csv	WDFY4_SZT2	3283	3129	1047	WDFY4	SZT2	protein_coding	protein_coding
Colon Colorectal Cancer.csv	FSIP2_SZT2	3078	2877	962	FSIP2	SZT2	protein_coding	protein_coding
Colon Colorectal Cancer.csv	KMT2D_SZT2	3283	3129	1047	KMT2D	SZT2	protein_coding	protein_coding
Colon Colorectal Cancer.csv	KMT2C_SZT2	3283	3129	1047	KMT2C	SZT2	protein_coding	protein_coding
Colon Colorectal Cancer.csv	DNAH17_SZT2	3283	3129	1047	DNAH17	SZT2	protein_coding	protein_coding
Colon Colorectal Cancer.csv	APC_TAF1L	3078	2877	962	APC	TAF1L	protein_coding	protein_coding
Colon Colorectal Cancer.csv	RYR2_TAF1L	3283	3129	1047	RYR2	TAF1L	protein_coding	protein_coding
Colon Colorectal Cancer.csv	FAT3_TAF1L	3078	2877	962	FAT3	TAF1L	protein_coding	protein_coding
Colon Colorectal Cancer.csv	SYNE1_TBC1D9	3078	2877	962	SYNE1	TBC1D9	protein_coding	protein_coding
Colon Colorectal Cancer.csv	CACNA1A_TCERG1	3078	2877	962	CACNA1A	TCERG1	protein_coding	protein_coding
Colon Colorectal Cancer.csv	DNAH7_TCERG1	3078	2877	962	DNAH7	TCERG1	protein_coding	protein_coding
Colon Colorectal Cancer.csv	APOB_TCERG1	3078	2877	962	APOB	TCERG1	protein_coding	protein_coding
Colon Colorectal Cancer.csv	PCLO_TCERG1	3078	2877	962	PCLO	TCERG1	protein_coding	protein_coding
Colon Colorectal Cancer.csv	EYS_TCERG1	3078	2877	962	EYS	TCERG1	protein_coding	protein_coding
Colon Colorectal Cancer.csv	HMCN1_TCERG1	3078	2877	962	HMCN1	TCERG1	protein_coding	protein_coding
Colon Colorectal Cancer.csv	NEB_TCERG1	3510	3377	1147	NEB	TCERG1	protein_coding	protein_coding
Colon Colorectal Cancer.csv	ABCA13_TCERG1	3078	2877	962	ABCA13	TCERG1	protein_coding	protein_coding
Colon Colorectal Cancer.csv	ZFHX4_TCERG1	3078	2877	962	ZFHX4	TCERG1	protein_coding	protein_coding
Colon Colorectal Cancer.csv	CSMD1_TCERG1	3078	2877	962	CSMD1	TCERG1	protein_coding	protein_coding
Colon Colorectal Cancer.csv	PKD1_TCF20	3283	3129	1047	PKD1	TCF20	protein_coding	protein_coding
Colon Colorectal Cancer.csv	MUC4_TCF20	3510	3377	1147	MUC4	TCF20	protein_coding	protein_coding
Colon Colorectal Cancer.csv	HMCN1_TCF20	3510	3377	1147	HMCN1	TCF20	protein_coding	protein_coding
Colon Colorectal Cancer.csv	VWF_TCF20	3283	3129	1047	VWF	TCF20	protein_coding	protein_coding
Colon Colorectal Cancer.csv	MACF1_TCF20	3283	3129	1047	MACF1	TCF20	protein_coding	protein_coding
Colon Colorectal Cancer.csv	DNAH7_TCF20	3692	3615	1271	DNAH7	TCF20	protein_coding	protein_coding
Colon Colorectal Cancer.csv	RNF213_TCF20	3510	3377	1147	RNF213	TCF20	protein_coding	protein_coding
Colon Colorectal Cancer.csv	SYNE2_TCF20	3510	3377	1147	SYNE2	TCF20	protein_coding	protein_coding
Colon Colorectal Cancer.csv	DNAH17_TCF20	3283	3129	1047	DNAH17	TCF20	protein_coding	protein_coding
Colon Colorectal Cancer.csv	FAT4_TCF20	3283	3129	1047	FAT4	TCF20	protein_coding	protein_coding
Colon Colorectal Cancer.csv	MKI67_TCF20	3283	3129	1047	MKI67	TCF20	protein_coding	protein_coding
Colon Colorectal Cancer.csv	ZFHX4_TCF20	3510	3377	1147	ZFHX4	TCF20	protein_coding	protein_coding
Colon Colorectal Cancer.csv	TP53_TCHH	3078	2877	962	TP53	TCHH	protein_coding	protein_coding
Colon Colorectal Cancer.csv	SYNE1_TCHH	3510	3377	1147	SYNE1	TCHH	protein_coding	protein_coding
Colon Colorectal Cancer.csv	ZFHX4_TECTA	3078	2877	962	ZFHX4	TECTA	protein_coding	protein_coding
Colon Colorectal Cancer.csv	TTN_TENC1	3692	3615	1271	TTN	TENC1	protein_coding	protein_coding
Colon Colorectal Cancer.csv	MUC16_TENC1	3692	3615	1271	MUC16	TENC1	protein_coding	protein_coding
Colon Colorectal Cancer.csv	DST_TENM1	3283	3129	1047	DST	TENM1	protein_coding	protein_coding
Colon Colorectal Cancer.csv	MUC16_TENM1	3283	3129	1047	MUC16	TENM1	protein_coding	protein_coding
Colon Colorectal Cancer.csv	FAT3_TENM1	3283	3129	1047	FAT3	TENM1	protein_coding	protein_coding
Colon Colorectal Cancer.csv	SYNE2_TENM1	3283	3129	1047	SYNE2	TENM1	protein_coding	protein_coding
Colon Colorectal Cancer.csv	KMT2C_TENM2	3692	3615	1271	KMT2C	TENM2	protein_coding	protein_coding
Colon Colorectal Cancer.csv	MUC4_TENM2	3692	3615	1271	MUC4	TENM2	protein_coding	protein_coding
Colon Colorectal Cancer.csv	FAT4_TENM2	3692	3615	1271	FAT4	TENM2	protein_coding	protein_coding
Colon Colorectal Cancer.csv	USH2A_TENM2	3692	3615	1271	USH2A	TENM2	protein_coding	protein_coding
Colon Colorectal Cancer.csv	FAT3_TENM2	3692	3615	1271	FAT3	TENM2	protein_coding	protein_coding
Colon Colorectal Cancer.csv	PKD1_TENM2	3692	3615	1271	PKD1	TENM2	protein_coding	protein_coding
Colon Colorectal Cancer.csv	SYNE2_TENM2	3692	3615	1271	SYNE2	TENM2	protein_coding	protein_coding
Colon Colorectal Cancer.csv	EYS_TENM3	3510	3377	1147	EYS	TENM3	protein_coding	protein_coding
Colon Colorectal Cancer.csv	CSMD1_TENM3	3283	3129	1047	CSMD1	TENM3	protein_coding	protein_coding
Colon Colorectal Cancer.csv	APOB_TENM3	3510	3377	1147	APOB	TENM3	protein_coding	protein_coding
Colon Colorectal Cancer.csv	MUC5B_TENM3	3510	3377	1147	MUC5B	TENM3	protein_coding	protein_coding
Colon Colorectal Cancer.csv	USP34_TENM3	3283	3129	1047	USP34	TENM3	protein_coding	protein_coding
Colon Colorectal Cancer.csv	DNAH1_TENM3	3283	3129	1047	DNAH1	TENM3	protein_coding	protein_coding
Colon Colorectal Cancer.csv	RNF213_TENM3	3882	3816	1416	RNF213	TENM3	protein_coding	protein_coding
Colon Colorectal Cancer.csv	DCHS1_TENM3	3692	3615	1271	DCHS1	TENM3	protein_coding	protein_coding
Colon Colorectal Cancer.csv	CSMD2_TENM3	3692	3615	1271	CSMD2	TENM3	protein_coding	protein_coding
Colon Colorectal Cancer.csv	HELZ2_TENM3	3692	3615	1271	HELZ2	TENM3	protein_coding	protein_coding
Colon Colorectal Cancer.csv	ACVR2A_TENM3	3692	3615	1271	ACVR2A	TENM3	protein_coding	protein_coding
Colon Colorectal Cancer.csv	STAB1_TENM3	3692	3615	1271	STAB1	TENM3	protein_coding	protein_coding
Colon Colorectal Cancer.csv	DMD_TENM3	3510	3377	1147	DMD	TENM3	protein_coding	protein_coding
Colon Colorectal Cancer.csv	GPR98_TENM4	3692	3615	1271	GPR98	TENM4	protein_coding	protein_coding
Colon Colorectal Cancer.csv	MUC16_TENM4	3510	3377	1147	MUC16	TENM4	protein_coding	protein_coding
Colon Colorectal Cancer.csv	NEB_TENM4	3692	3615	1271	NEB	TENM4	protein_coding	protein_coding
Colon Colorectal Cancer.csv	SYNE1_TENM4	3510	3377	1147	SYNE1	TENM4	protein_coding	protein_coding
Colon Colorectal Cancer.csv	APC_TET1	3283	3129	1047	APC	TET1	protein_coding	protein_coding
Colon Colorectal Cancer.csv	TTN_TEX14	3078	2877	962	TTN	TEX14	protein_coding	protein_coding
Colon Colorectal Cancer.csv	FAT3_TG	3078	2877	962	FAT3	TG	protein_coding	protein_coding
Colon Colorectal Cancer.csv	SYNE1_TG	3283	3129	1047	SYNE1	TG	protein_coding	protein_coding
Colon Colorectal Cancer.csv	DNAH7_TG	3078	2877	962	DNAH7	TG	protein_coding	protein_coding
Colon Colorectal Cancer.csv	AKAP9_TG	3078	2877	962	AKAP9	TG	protein_coding	protein_coding
Colon Colorectal Cancer.csv	DST_TIE1	3078	2877	962	DST	TIE1	protein_coding	protein_coding
Colon Colorectal Cancer.csv	MUC16_TIE1	3283	3129	1047	MUC16	TIE1	protein_coding	protein_coding
Colon Colorectal Cancer.csv	KMT2C_TIE1	3078	2877	962	KMT2C	TIE1	protein_coding	protein_coding
Colon Colorectal Cancer.csv	HMCN1_TNR	3283	3129	1047	HMCN1	TNR	protein_coding	protein_coding
Colon Colorectal Cancer.csv	SYNE2_TNR	3283	3129	1047	SYNE2	TNR	protein_coding	protein_coding
Colon Colorectal Cancer.csv	LRP1B_TNR	3510	3377	1147	LRP1B	TNR	protein_coding	protein_coding
Colon Colorectal Cancer.csv	FAT4_TNRC6A	3078	2877	962	FAT4	TNRC6A	protein_coding	protein_coding
Colon Colorectal Cancer.csv	DST_TNRC6A	3283	3129	1047	DST	TNRC6A	protein_coding	protein_coding
Colon Colorectal Cancer.csv	FAT3_TNRC6A	3283	3129	1047	FAT3	TNRC6A	protein_coding	protein_coding
Colon Colorectal Cancer.csv	RYR3_TNRC6A	3078	2877	962	RYR3	TNRC6A	protein_coding	protein_coding
Colon Colorectal Cancer.csv	SYNE1_TNRC6A	3078	2877	962	SYNE1	TNRC6A	protein_coding	protein_coding
Colon Colorectal Cancer.csv	MUC16_TNRC6B	3078	2877	962	MUC16	TNRC6B	protein_coding	protein_coding
Colon Colorectal Cancer.csv	TTN_TNRC6B	3078	2877	962	TTN	TNRC6B	protein_coding	protein_coding
Colon Colorectal Cancer.csv	GPR98_TNXB	3510	3377	1147	GPR98	TNXB	protein_coding	protein_coding
Colon Colorectal Cancer.csv	LRP1B_TNXB	3510	3377	1147	LRP1B	TNXB	protein_coding	protein_coding
Colon Colorectal Cancer.csv	GPR98_TRIO	3510	3377	1147	GPR98	TRIO	protein_coding	protein_coding
Colon Colorectal Cancer.csv	AKAP9_TRIO	3692	3615	1271	AKAP9	TRIO	protein_coding	protein_coding
Colon Colorectal Cancer.csv	VPS13B_TRIO	3078	2877	962	VPS13B	TRIO	protein_coding	protein_coding
Colon Colorectal Cancer.csv	FAT4_TRIO	3078	2877	962	FAT4	TRIO	protein_coding	protein_coding
Colon Colorectal Cancer.csv	DNAH7_TRIO	3510	3377	1147	DNAH7	TRIO	protein_coding	protein_coding
Colon Colorectal Cancer.csv	SCN2A_TRIO	3078	2877	962	SCN2A	TRIO	protein_coding	protein_coding
Colon Colorectal Cancer.csv	PKD1_TRIO	3283	3129	1047	PKD1	TRIO	protein_coding	protein_coding
Colon Colorectal Cancer.csv	PCDH15_TRIO	3283	3129	1047	PCDH15	TRIO	protein_coding	protein_coding
Colon Colorectal Cancer.csv	MUC4_TRIO	3510	3377	1147	MUC4	TRIO	protein_coding	protein_coding
Colon Colorectal Cancer.csv	PCLO_TRIO	3510	3377	1147	PCLO	TRIO	protein_coding	protein_coding
Colon Colorectal Cancer.csv	GNAS_TRIO	3078	2877	962	GNAS	TRIO	protein_coding	protein_coding
Colon Colorectal Cancer.csv	ZFHX3_TRIO	3283	3129	1047	ZFHX3	TRIO	protein_coding	protein_coding
Colon Colorectal Cancer.csv	LRRK2_TRIO	3078	2877	962	LRRK2	TRIO	protein_coding	protein_coding
Colon Colorectal Cancer.csv	TPR_TRIO	3078	2877	962	TPR	TRIO	protein_coding	protein_coding
Colon Colorectal Cancer.csv	ABCA13_TRIO	3283	3129	1047	ABCA13	TRIO	protein_coding	protein_coding
Colon Colorectal Cancer.csv	BRCA2_TRIO	3078	2877	962	BRCA2	TRIO	protein_coding	protein_coding
Colon Colorectal Cancer.csv	CHD9_TRIO	3078	2877	962	CHD9	TRIO	protein_coding	protein_coding
Colon Colorectal Cancer.csv	LAMA2_TRIO	3283	3129	1047	LAMA2	TRIO	protein_coding	protein_coding
Colon Colorectal Cancer.csv	EYS_TRIO	3283	3129	1047	EYS	TRIO	protein_coding	protein_coding
Colon Colorectal Cancer.csv	LRP1B_TRIO	3510	3377	1147	LRP1B	TRIO	protein_coding	protein_coding
Colon Colorectal Cancer.csv	HMCN1_TRIOBP	3078	2877	962	HMCN1	TRIOBP	protein_coding	protein_coding
Colon Colorectal Cancer.csv	KMT2C_TRIOBP	3283	3129	1047	KMT2C	TRIOBP	protein_coding	protein_coding
Colon Colorectal Cancer.csv	LRP1_TRIOBP	3283	3129	1047	LRP1	TRIOBP	protein_coding	protein_coding
Colon Colorectal Cancer.csv	OBSCN_TRIOBP	3283	3129	1047	OBSCN	TRIOBP	protein_coding	protein_coding
Colon Colorectal Cancer.csv	ZFHX4_TRIOBP	3283	3129	1047	ZFHX4	TRIOBP	protein_coding	protein_coding
Colon Colorectal Cancer.csv	FREM2_TRIOBP	3078	2877	962	FREM2	TRIOBP	protein_coding	protein_coding
Colon Colorectal Cancer.csv	FSIP2_TRIOBP	3078	2877	962	FSIP2	TRIOBP	protein_coding	protein_coding
Colon Colorectal Cancer.csv	RYR1_TRIOBP	3078	2877	962	RYR1	TRIOBP	protein_coding	protein_coding
Colon Colorectal Cancer.csv	TTN_TRPS1	3510	3377	1147	TTN	TRPS1	protein_coding	protein_coding
Colon Colorectal Cancer.csv	RYR3_TRRAP	3283	3129	1047	RYR3	TRRAP	protein_coding	protein_coding
Colon Colorectal Cancer.csv	VWF_TRRAP	3283	3129	1047	VWF	TRRAP	protein_coding	protein_coding
Colon Colorectal Cancer.csv	MUC5B_TRRAP	3283	3129	1047	MUC5B	TRRAP	protein_coding	protein_coding
Colon Colorectal Cancer.csv	NCOR1_TRRAP	3510	3377	1147	NCOR1	TRRAP	protein_coding	protein_coding
Colon Colorectal Cancer.csv	PLXNA2_TRRAP	3283	3129	1047	PLXNA2	TRRAP	protein_coding	protein_coding
Colon Colorectal Cancer.csv	TCF20_TRRAP	3283	3129	1047	TCF20	TRRAP	protein_coding	protein_coding
Colon Colorectal Cancer.csv	NIPBL_TRRAP	3283	3129	1047	NIPBL	TRRAP	protein_coding	protein_coding
Colon Colorectal Cancer.csv	DYNC2H1_TRRAP	3283	3129	1047	DYNC2H1	TRRAP	protein_coding	protein_coding
Colon Colorectal Cancer.csv	BRCA2_TRRAP	3283	3129	1047	BRCA2	TRRAP	protein_coding	protein_coding
Colon Colorectal Cancer.csv	ASCC3_TRRAP	3283	3129	1047	ASCC3	TRRAP	protein_coding	protein_coding
Colon Colorectal Cancer.csv	PKHD1L1_TRRAP	3510	3377	1147	PKHD1L1	TRRAP	protein_coding	protein_coding
Colon Colorectal Cancer.csv	NAV3_TRRAP	3078	2877	962	NAV3	TRRAP	protein_coding	protein_coding
Colon Colorectal Cancer.csv	PCDH15_TRRAP	3510	3377	1147	PCDH15	TRRAP	protein_coding	protein_coding
Colon Colorectal Cancer.csv	LAMA1_TRRAP	3283	3129	1047	LAMA1	TRRAP	protein_coding	protein_coding
Colon Colorectal Cancer.csv	CDH23_TRRAP	3283	3129	1047	CDH23	TRRAP	protein_coding	protein_coding
Colon Colorectal Cancer.csv	MKI67_TRRAP	3283	3129	1047	MKI67	TRRAP	protein_coding	protein_coding
Colon Colorectal Cancer.csv	LRRK2_TRRAP	3078	2877	962	LRRK2	TRRAP	protein_coding	protein_coding
Colon Colorectal Cancer.csv	SPEG_TRRAP	3078	2877	962	SPEG	TRRAP	protein_coding	protein_coding
Colon Colorectal Cancer.csv	ZFHX3_TRRAP	3078	2877	962	ZFHX3	TRRAP	protein_coding	protein_coding
Colon Colorectal Cancer.csv	KIAA1549_TRRAP	3078	2877	962	KIAA1549	TRRAP	protein_coding	protein_coding
Colon Colorectal Cancer.csv	SDK1_TRRAP	3283	3129	1047	SDK1	TRRAP	protein_coding	protein_coding
Colon Colorectal Cancer.csv	SPTBN5_TRRAP	3078	2877	962	SPTBN5	TRRAP	protein_coding	protein_coding
Colon Colorectal Cancer.csv	SACS_TRRAP	3283	3129	1047	SACS	TRRAP	protein_coding	protein_coding
Colon Colorectal Cancer.csv	MAP3K4_TRRAP	3078	2877	962	MAP3K4	TRRAP	protein_coding	protein_coding
Colon Colorectal Cancer.csv	DCHS2_TRRAP	3510	3377	1147	DCHS2	TRRAP	protein_coding	protein_coding
Colon Colorectal Cancer.csv	PKD1_TRRAP	3078	2877	962	PKD1	TRRAP	protein_coding	protein_coding
Colon Colorectal Cancer.csv	OBSCN_TSHZ3	3283	3129	1047	OBSCN	TSHZ3	protein_coding	protein_coding
Colon Colorectal Cancer.csv	RERE_TTN	3283	3129	1047	RERE	TTN	protein_coding	protein_coding
Colon Colorectal Cancer.csv	DOCK1_TTN	3283	3129	1047	DOCK1	TTN	protein_coding	protein_coding
Colon Colorectal Cancer.csv	GON4L_TTN	3283	3129	1047	GON4L	TTN	protein_coding	protein_coding
Colon Colorectal Cancer.csv	GRIK3_TTN	3283	3129	1047	GRIK3	TTN	protein_coding	protein_coding
Colon Colorectal Cancer.csv	DNAH7_UBR4	3283	3129	1047	DNAH7	UBR4	protein_coding	protein_coding
Colon Colorectal Cancer.csv	STAB1_UBR5	3692	3615	1271	STAB1	UBR5	protein_coding	protein_coding
Colon Colorectal Cancer.csv	RYR3_UBR5	3283	3129	1047	RYR3	UBR5	protein_coding	protein_coding
Colon Colorectal Cancer.csv	NEB_UBR5	3510	3377	1147	NEB	UBR5	protein_coding	protein_coding
Colon Colorectal Cancer.csv	MUC5B_UBR5	3283	3129	1047	MUC5B	UBR5	protein_coding	protein_coding
Colon Colorectal Cancer.csv	NAV3_UBR5	3078	2877	962	NAV3	UBR5	protein_coding	protein_coding
Colon Colorectal Cancer.csv	DLC1_UBR5	3283	3129	1047	DLC1	UBR5	protein_coding	protein_coding
Colon Colorectal Cancer.csv	TRRAP_UBR5	3283	3129	1047	TRRAP	UBR5	protein_coding	protein_coding
Colon Colorectal Cancer.csv	MDN1_UBR5	3510	3377	1147	MDN1	UBR5	protein_coding	protein_coding
Colon Colorectal Cancer.csv	EYS_UBR5	3283	3129	1047	EYS	UBR5	protein_coding	protein_coding
Colon Colorectal Cancer.csv	SACS_UBR5	3283	3129	1047	SACS	UBR5	protein_coding	protein_coding
Colon Colorectal Cancer.csv	RNF213_UBR5	3692	3615	1271	RNF213	UBR5	protein_coding	protein_coding
Colon Colorectal Cancer.csv	RYR2_UBR5	3283	3129	1047	RYR2	UBR5	protein_coding	protein_coding
Colon Colorectal Cancer.csv	RP1_UBR5	3283	3129	1047	RP1	UBR5	protein_coding	protein_coding
Colon Colorectal Cancer.csv	LAMA1_UBR5	3283	3129	1047	LAMA1	UBR5	protein_coding	protein_coding
Colon Colorectal Cancer.csv	MKI67_UBR5	3510	3377	1147	MKI67	UBR5	protein_coding	protein_coding
Colon Colorectal Cancer.csv	KMT2B_UBR5	3283	3129	1047	KMT2B	UBR5	protein_coding	protein_coding
Colon Colorectal Cancer.csv	USP34_UBR5	3078	2877	962	USP34	UBR5	protein_coding	protein_coding
Colon Colorectal Cancer.csv	PCDH15_UBR5	3283	3129	1047	PCDH15	UBR5	protein_coding	protein_coding
Colon Colorectal Cancer.csv	ZFHX4_UBR5	3283	3129	1047	ZFHX4	UBR5	protein_coding	protein_coding
Colon Colorectal Cancer.csv	ASCC3_UBR5	3283	3129	1047	ASCC3	UBR5	protein_coding	protein_coding
Colon Colorectal Cancer.csv	UTRN_UBR5	3078	2877	962	UTRN	UBR5	protein_coding	protein_coding
Colon Colorectal Cancer.csv	CDH23_UBR5	3283	3129	1047	CDH23	UBR5	protein_coding	protein_coding
Colon Colorectal Cancer.csv	PLEC_UBR5	3283	3129	1047	PLEC	UBR5	protein_coding	protein_coding
Colon Colorectal Cancer.csv	MYO15A_UBR5	3510	3377	1147	MYO15A	UBR5	protein_coding	protein_coding
Colon Colorectal Cancer.csv	RNF213_UNC13C	3692	3615	1271	RNF213	UNC13C	protein_coding	protein_coding
Colon Colorectal Cancer.csv	VWF_UNC13C	3283	3129	1047	VWF	UNC13C	protein_coding	protein_coding
Colon Colorectal Cancer.csv	MACF1_UNC13C	3283	3129	1047	MACF1	UNC13C	protein_coding	protein_coding
Colon Colorectal Cancer.csv	LRP1_UNC13C	3283	3129	1047	LRP1	UNC13C	protein_coding	protein_coding
Colon Colorectal Cancer.csv	MUC4_UNC13C	3283	3129	1047	MUC4	UNC13C	protein_coding	protein_coding
Colon Colorectal Cancer.csv	FREM2_UNC13C	3283	3129	1047	FREM2	UNC13C	protein_coding	protein_coding
Colon Colorectal Cancer.csv	SDK1_UNC13C	3283	3129	1047	SDK1	UNC13C	protein_coding	protein_coding
Colon Colorectal Cancer.csv	BRCA2_UNC13C	3078	2877	962	BRCA2	UNC13C	protein_coding	protein_coding
Colon Colorectal Cancer.csv	TP53_UNC13C	3078	2877	962	TP53	UNC13C	protein_coding	protein_coding
Colon Colorectal Cancer.csv	ACVR2A_UNC13C	3283	3129	1047	ACVR2A	UNC13C	protein_coding	protein_coding
Colon Colorectal Cancer.csv	MKI67_UNC13C	3078	2877	962	MKI67	UNC13C	protein_coding	protein_coding
Colon Colorectal Cancer.csv	LPHN3_UNC13C	3283	3129	1047	LPHN3	UNC13C	protein_coding	protein_coding
Colon Colorectal Cancer.csv	MUC4_UNC80	3510	3377	1147	MUC4	UNC80	protein_coding	protein_coding
Colon Colorectal Cancer.csv	WDFY4_UNC80	3283	3129	1047	WDFY4	UNC80	protein_coding	protein_coding
Colon Colorectal Cancer.csv	NEB_UNC80	3510	3377	1147	NEB	UNC80	protein_coding	protein_coding
Colon Colorectal Cancer.csv	PLEC_UNC80	3510	3377	1147	PLEC	UNC80	protein_coding	protein_coding
Colon Colorectal Cancer.csv	FAT2_UNC80	3283	3129	1047	FAT2	UNC80	protein_coding	protein_coding
Colon Colorectal Cancer.csv	MACF1_UNC80	3283	3129	1047	MACF1	UNC80	protein_coding	protein_coding
Colon Colorectal Cancer.csv	LYST_UNC80	3510	3377	1147	LYST	UNC80	protein_coding	protein_coding
Colon Colorectal Cancer.csv	FAT4_UNC80	3283	3129	1047	FAT4	UNC80	protein_coding	protein_coding
Colon Colorectal Cancer.csv	PCDH15_UNC80	3510	3377	1147	PCDH15	UNC80	protein_coding	protein_coding
Colon Colorectal Cancer.csv	MKI67_UNC80	3283	3129	1047	MKI67	UNC80	protein_coding	protein_coding
Colon Colorectal Cancer.csv	HMCN1_UNC80	3078	2877	962	HMCN1	UNC80	protein_coding	protein_coding
Colon Colorectal Cancer.csv	KMT2D_UNC80	1380	1329	557	KMT2D	UNC80	protein_coding	protein_coding
Colon Colorectal Cancer.csv	EYS_BDP1	3078	2877	962	EYS	BDP1	protein_coding	protein_coding
Colon Colorectal Cancer.csv	RYR3_BDP1	3078	2877	962	RYR3	BDP1	protein_coding	protein_coding
Colon Colorectal Cancer.csv	EYS_BIRC6	3078	2877	962	EYS	BIRC6	protein_coding	protein_coding
Colon Colorectal Cancer.csv	N4BP2_BMPR2	3283	3129	1047	N4BP2	BMPR2	protein_coding	protein_coding
Colon Colorectal Cancer.csv	ZNF536_BMPR2	3283	3129	1047	ZNF536	BMPR2	protein_coding	protein_coding
Colon Colorectal Cancer.csv	CACNA1E_BMPR2	3283	3129	1047	CACNA1E	BMPR2	protein_coding	protein_coding
Colon Colorectal Cancer.csv	EIF4G1_BMPR2	3078	2877	962	EIF4G1	BMPR2	protein_coding	protein_coding
Colon Colorectal Cancer.csv	TTN_BMS1	3283	3129	1047	TTN	BMS1	protein_coding	protein_coding
Colon Colorectal Cancer.csv	RYR3_BMS1	3283	3129	1047	RYR3	BMS1	protein_coding	protein_coding
Colon Colorectal Cancer.csv	APC_BPTF	3283	3129	1047	APC	BPTF	protein_coding	protein_coding
Colon Colorectal Cancer.csv	HMCN1_BRAF	3283	3129	1047	HMCN1	BRAF	protein_coding	protein_coding
Colon Colorectal Cancer.csv	ABCA13_BRAF	3078	2877	962	ABCA13	BRAF	protein_coding	protein_coding
Colon Colorectal Cancer.csv	TP53_BRAF	3078	2877	962	TP53	BRAF	protein_coding	protein_coding
Colon Colorectal Cancer.csv	SCN9A_BRCA2	3283	3129	1047	SCN9A	BRCA2	protein_coding	protein_coding
Colon Colorectal Cancer.csv	DNAH10_BRCA2	3078	2877	962	DNAH10	BRCA2	protein_coding	protein_coding
Colon Colorectal Cancer.csv	ZNF536_BRCA2	3283	3129	1047	ZNF536	BRCA2	protein_coding	protein_coding
Colon Colorectal Cancer.csv	SDK1_BRCA2	3283	3129	1047	SDK1	BRCA2	protein_coding	protein_coding
Colon Colorectal Cancer.csv	ZFHX3_BRCA2	3078	2877	962	ZFHX3	BRCA2	protein_coding	protein_coding
Colon Colorectal Cancer.csv	CSMD2_BRCA2	3283	3129	1047	CSMD2	BRCA2	protein_coding	protein_coding
Colon Colorectal Cancer.csv	DLC1_BRCA2	3078	2877	962	DLC1	BRCA2	protein_coding	protein_coding
Colon Colorectal Cancer.csv	SACS_BRD3	3078	2877	962	SACS	BRD3	protein_coding	protein_coding
Colon Colorectal Cancer.csv	TENM2_BRD3	3510	3377	1147	TENM2	BRD3	protein_coding	protein_coding
Colon Colorectal Cancer.csv	LAMA5_BRD3	3078	2877	962	LAMA5	BRD3	protein_coding	protein_coding
Colon Colorectal Cancer.csv	TCERG1_BRD3	3283	3129	1047	TCERG1	BRD3	protein_coding	protein_coding
Colon Colorectal Cancer.csv	APOB_BRD3	3078	2877	962	APOB	BRD3	protein_coding	protein_coding
Colon Colorectal Cancer.csv	SPEG_BRD3	3078	2877	962	SPEG	BRD3	protein_coding	protein_coding
Colon Colorectal Cancer.csv	DYNC2H1_BRD3	3078	2877	962	DYNC2H1	BRD3	protein_coding	protein_coding
Colon Colorectal Cancer.csv	MUC5B_BRD3	3078	2877	962	MUC5B	BRD3	protein_coding	protein_coding
Colon Colorectal Cancer.csv	ZFHX4_BRD3	3078	2877	962	ZFHX4	BRD3	protein_coding	protein_coding
Colon Colorectal Cancer.csv	FREM2_BRD3	3078	2877	962	FREM2	BRD3	protein_coding	protein_coding
Colon Colorectal Cancer.csv	MLLT4_BRD3	3078	2877	962	MLLT4	BRD3	protein_coding	protein_coding
Colon Colorectal Cancer.csv	POLQ_BRD3	3078	2877	962	POLQ	BRD3	protein_coding	protein_coding
Colon Colorectal Cancer.csv	VPS13B_BRD3	3078	2877	962	VPS13B	BRD3	protein_coding	protein_coding
Colon Colorectal Cancer.csv	AKAP9_BRD3	3078	2877	962	AKAP9	BRD3	protein_coding	protein_coding
Colon Colorectal Cancer.csv	LAMA2_BRD3	3078	2877	962	LAMA2	BRD3	protein_coding	protein_coding
Colon Colorectal Cancer.csv	RIF1_BRD3	3078	2877	962	RIF1	BRD3	protein_coding	protein_coding
Colon Colorectal Cancer.csv	MAP3K4_BRD3	3078	2877	962	MAP3K4	BRD3	protein_coding	protein_coding
Colon Colorectal Cancer.csv	RYR3_BRD3	3078	2877	962	RYR3	BRD3	protein_coding	protein_coding
Colon Colorectal Cancer.csv	UNC80_BRD3	3283	3129	1047	UNC80	BRD3	protein_coding	protein_coding
Colon Colorectal Cancer.csv	LRRK2_BRD3	3283	3129	1047	LRRK2	BRD3	protein_coding	protein_coding
Colon Colorectal Cancer.csv	KIAA1109_BRD3	3078	2877	962	KIAA1109	BRD3	protein_coding	protein_coding
Colon Colorectal Cancer.csv	C5orf42_BRD3	3283	3129	1047	C5orf42	BRD3	protein_coding	protein_coding
Colon Colorectal Cancer.csv	STAB1_BRD3	3283	3129	1047	STAB1	BRD3	protein_coding	protein_coding
Colon Colorectal Cancer.csv	GPR98_BRD3	3283	3129	1047	GPR98	BRD3	protein_coding	protein_coding
Colon Colorectal Cancer.csv	CDH23_BRD3	3283	3129	1047	CDH23	BRD3	protein_coding	protein_coding
Colon Colorectal Cancer.csv	PARD3_BRD3	3283	3129	1047	PARD3	BRD3	protein_coding	protein_coding
Colon Colorectal Cancer.csv	DNAH5_BRD3	3078	2877	962	DNAH5	BRD3	protein_coding	protein_coding
Colon Colorectal Cancer.csv	PKHD1L1_BRD3	3283	3129	1047	PKHD1L1	BRD3	protein_coding	protein_coding
Colon Colorectal Cancer.csv	CACNA1A_BRD3	3078	2877	962	CACNA1A	BRD3	protein_coding	protein_coding
Colon Colorectal Cancer.csv	VPS13D_BRD3	3078	2877	962	VPS13D	BRD3	protein_coding	protein_coding
Colon Colorectal Cancer.csv	DST_BRWD1	3078	2877	962	DST	BRWD1	protein_coding	protein_coding
Colon Colorectal Cancer.csv	SDK1_BRWD1	3078	2877	962	SDK1	BRWD1	protein_coding	protein_coding
Colon Colorectal Cancer.csv	ABCA13_BRWD1	3078	2877	962	ABCA13	BRWD1	protein_coding	protein_coding
Colon Colorectal Cancer.csv	MUC16_BRWD1	3078	2877	962	MUC16	BRWD1	protein_coding	protein_coding
Colon Colorectal Cancer.csv	BMPR2_BSN	3283	3129	1047	BMPR2	BSN	protein_coding	protein_coding
Colon Colorectal Cancer.csv	CDH23_BSN	3510	3377	1147	CDH23	BSN	protein_coding	protein_coding
Colon Colorectal Cancer.csv	SDK1_BTBD7	3078	2877	962	SDK1	BTBD7	protein_coding	protein_coding
Colon Colorectal Cancer.csv	OBSCN_C10orf71	3283	3129	1047	OBSCN	C10orf71	protein_coding	protein_coding
Colon Colorectal Cancer.csv	MKI67_C12orf55	3078	2877	962	MKI67	C12orf55	protein_coding	protein_coding
Colon Colorectal Cancer.csv	DST_C12orf55	3283	3129	1047	DST	C12orf55	protein_coding	protein_coding
Colon Colorectal Cancer.csv	LRP1B_C12orf55	3510	3377	1147	LRP1B	C12orf55	protein_coding	protein_coding
Colon Colorectal Cancer.csv	WDFY4_C12orf55	3078	2877	962	WDFY4	C12orf55	protein_coding	protein_coding
Colon Colorectal Cancer.csv	VWF_C12orf55	3078	2877	962	VWF	C12orf55	protein_coding	protein_coding
Colon Colorectal Cancer.csv	HMCN1_C12orf55	3283	3129	1047	HMCN1	C12orf55	protein_coding	protein_coding
Colon Colorectal Cancer.csv	PLEC_C12orf55	3510	3377	1147	PLEC	C12orf55	protein_coding	protein_coding
Colon Colorectal Cancer.csv	GPR98_C12orf55	3510	3377	1147	GPR98	C12orf55	protein_coding	protein_coding
Colon Colorectal Cancer.csv	TTN_C2CD3	3078	2877	962	TTN	C2CD3	protein_coding	protein_coding
Colon Colorectal Cancer.csv	PCDH10_C5orf42	3283	3129	1047	PCDH10	C5orf42	protein_coding	protein_coding
Colon Colorectal Cancer.csv	ABCA13_C5orf42	3283	3129	1047	ABCA13	C5orf42	protein_coding	protein_coding
Colon Colorectal Cancer.csv	SPEG_C5orf42	3283	3129	1047	SPEG	C5orf42	protein_coding	protein_coding
Colon Colorectal Cancer.csv	LRRK2_C5orf42	3283	3129	1047	LRRK2	C5orf42	protein_coding	protein_coding
Colon Colorectal Cancer.csv	VPS13B_C5orf42	3283	3129	1047	VPS13B	C5orf42	protein_coding	protein_coding
Colon Colorectal Cancer.csv	PIK3CA_C5orf42	3510	3377	1147	PIK3CA	C5orf42	protein_coding	protein_coding
Colon Colorectal Cancer.csv	SCN8A_C5orf42	3078	2877	962	SCN8A	C5orf42	protein_coding	protein_coding
Colon Colorectal Cancer.csv	FLG_C5orf42	3283	3129	1047	FLG	C5orf42	protein_coding	protein_coding
Colon Colorectal Cancer.csv	DLC1_C5orf42	3078	2877	962	DLC1	C5orf42	protein_coding	protein_coding
Colon Colorectal Cancer.csv	DYSF_C5orf42	3078	2877	962	DYSF	C5orf42	protein_coding	protein_coding
Colon Colorectal Cancer.csv	BMPR2_C5orf42	3510	3377	1147	BMPR2	C5orf42	protein_coding	protein_coding
Colon Colorectal Cancer.csv	TRRAP_C5orf42	3283	3129	1047	TRRAP	C5orf42	protein_coding	protein_coding
Colon Colorectal Cancer.csv	FAT4_C5orf42	3283	3129	1047	FAT4	C5orf42	protein_coding	protein_coding
Colon Colorectal Cancer.csv	KIAA1109_C5orf42	3078	2877	962	KIAA1109	C5orf42	protein_coding	protein_coding
Colon Colorectal Cancer.csv	EIF4G1_C5orf42	3283	3129	1047	EIF4G1	C5orf42	protein_coding	protein_coding
Colon Colorectal Cancer.csv	PLEC_C5orf42	3283	3129	1047	PLEC	C5orf42	protein_coding	protein_coding
Colon Colorectal Cancer.csv	CACNA1B_C5orf42	3283	3129	1047	CACNA1B	C5orf42	protein_coding	protein_coding
Colon Colorectal Cancer.csv	DNAH17_C5orf42	3283	3129	1047	DNAH17	C5orf42	protein_coding	protein_coding
Colon Colorectal Cancer.csv	PKHD1L1_C5orf42	3510	3377	1147	PKHD1L1	C5orf42	protein_coding	protein_coding
Colon Colorectal Cancer.csv	CSMD3_C5orf42	3078	2877	962	CSMD3	C5orf42	protein_coding	protein_coding
Colon Colorectal Cancer.csv	NCOR2_C5orf42	3510	3377	1147	NCOR2	C5orf42	protein_coding	protein_coding
Colon Colorectal Cancer.csv	LRP1B_C5orf42	3692	3615	1271	LRP1B	C5orf42	protein_coding	protein_coding
Colon Colorectal Cancer.csv	PKD1_C5orf42	3283	3129	1047	PKD1	C5orf42	protein_coding	protein_coding
Colon Colorectal Cancer.csv	APC2_C5orf42	3510	3377	1147	APC2	C5orf42	protein_coding	protein_coding
Colon Colorectal Cancer.csv	RYR3_C5orf42	3510	3377	1147	RYR3	C5orf42	protein_coding	protein_coding
Colon Colorectal Cancer.csv	DCHS2_C5orf42	3283	3129	1047	DCHS2	C5orf42	protein_coding	protein_coding
Colon Colorectal Cancer.csv	SVIL_C5orf42	3510	3377	1147	SVIL	C5orf42	protein_coding	protein_coding
Colon Colorectal Cancer.csv	ACVR2A_CACNA1A	3283	3129	1047	ACVR2A	CACNA1A	protein_coding	protein_coding
Colon Colorectal Cancer.csv	TP53_CACNA1A	3078	2877	962	TP53	CACNA1A	protein_coding	protein_coding
Colon Colorectal Cancer.csv	SPTB_CACNA1A	3078	2877	962	SPTB	CACNA1A	protein_coding	protein_coding
Colon Colorectal Cancer.csv	DOPEY2_CACNA1A	3078	2877	962	DOPEY2	CACNA1A	protein_coding	protein_coding
Colon Colorectal Cancer.csv	DNAH9_CACNA1A	3078	2877	962	DNAH9	CACNA1A	protein_coding	protein_coding
Colon Colorectal Cancer.csv	HERC2_CACNA1A	3078	2877	962	HERC2	CACNA1A	protein_coding	protein_coding
Colon Colorectal Cancer.csv	ZFHX4_CACNA1B	3078	2877	962	ZFHX4	CACNA1B	protein_coding	protein_coding
Colon Colorectal Cancer.csv	PCDH15_CACNA1B	3078	2877	962	PCDH15	CACNA1B	protein_coding	protein_coding
Colon Colorectal Cancer.csv	LRP1_CACNA1B	3283	3129	1047	LRP1	CACNA1B	protein_coding	protein_coding
Colon Colorectal Cancer.csv	PKHD1L1_CACNA1B	3078	2877	962	PKHD1L1	CACNA1B	protein_coding	protein_coding
Colon Colorectal Cancer.csv	DCHS2_CACNA1B	3078	2877	962	DCHS2	CACNA1B	protein_coding	protein_coding
Colon Colorectal Cancer.csv	DST_CACNA1C	3510	3377	1147	DST	CACNA1C	protein_coding	protein_coding
Colon Colorectal Cancer.csv	DNAH7_CACNA1C	3510	3377	1147	DNAH7	CACNA1C	protein_coding	protein_coding
Colon Colorectal Cancer.csv	KMT2C_CACNA1E	3283	3129	1047	KMT2C	CACNA1E	protein_coding	protein_coding
Colon Colorectal Cancer.csv	UNC13C_CACNA1H	3078	2877	962	UNC13C	CACNA1H	protein_coding	protein_coding
Colon Colorectal Cancer.csv	NEB_CACNA1H	3510	3377	1147	NEB	CACNA1H	protein_coding	protein_coding
Colon Colorectal Cancer.csv	LRP2_CACNA1H	3078	2877	962	LRP2	CACNA1H	protein_coding	protein_coding
Colon Colorectal Cancer.csv	DMD_CACNA1H	3283	3129	1047	DMD	CACNA1H	protein_coding	protein_coding
Colon Colorectal Cancer.csv	CACNA1A_CACNA1H	3078	2877	962	CACNA1A	CACNA1H	protein_coding	protein_coding
Colon Colorectal Cancer.csv	SETD1B_CACNA1H	3283	3129	1047	SETD1B	CACNA1H	protein_coding	protein_coding
Colon Colorectal Cancer.csv	SDK1_CACNA1H	3283	3129	1047	SDK1	CACNA1H	protein_coding	protein_coding
Colon Colorectal Cancer.csv	AHNAK2_CACNA1H	3283	3129	1047	AHNAK2	CACNA1H	protein_coding	protein_coding
Colon Colorectal Cancer.csv	ZNF536_CACNA1H	3078	2877	962	ZNF536	CACNA1H	protein_coding	protein_coding
Colon Colorectal Cancer.csv	POLD1_CACNA1H	3283	3129	1047	POLD1	CACNA1H	protein_coding	protein_coding
Colon Colorectal Cancer.csv	LRP1B_CACNA1H	3283	3129	1047	LRP1B	CACNA1H	protein_coding	protein_coding
Colon Colorectal Cancer.csv	FBN3_CACNA1H	3283	3129	1047	FBN3	CACNA1H	protein_coding	protein_coding
Colon Colorectal Cancer.csv	RIF1_CACNA1H	3283	3129	1047	RIF1	CACNA1H	protein_coding	protein_coding
Colon Colorectal Cancer.csv	CIT_CACNA1H	3078	2877	962	CIT	CACNA1H	protein_coding	protein_coding
Colon Colorectal Cancer.csv	SRCAP_CACNA1H	3078	2877	962	SRCAP	CACNA1H	protein_coding	protein_coding
Colon Colorectal Cancer.csv	PCLO_CACNA1H	3078	2877	962	PCLO	CACNA1H	protein_coding	protein_coding
Colon Colorectal Cancer.csv	NCOR2_CACNA1H	3283	3129	1047	NCOR2	CACNA1H	protein_coding	protein_coding
Colon Colorectal Cancer.csv	MEGF8_CACNA1H	3283	3129	1047	MEGF8	CACNA1H	protein_coding	protein_coding
Colon Colorectal Cancer.csv	CREBBP_CACNA1H	3283	3129	1047	CREBBP	CACNA1H	protein_coding	protein_coding
Colon Colorectal Cancer.csv	MKI67_CACNA1H	3078	2877	962	MKI67	CACNA1H	protein_coding	protein_coding
Colon Colorectal Cancer.csv	SACS_CACNA1H	3078	2877	962	SACS	CACNA1H	protein_coding	protein_coding
Colon Colorectal Cancer.csv	MUC2_CACNA1H	3078	2877	962	MUC2	CACNA1H	protein_coding	protein_coding
Colon Colorectal Cancer.csv	KIF26A_CACNA1H	3283	3129	1047	KIF26A	CACNA1H	protein_coding	protein_coding
Colon Colorectal Cancer.csv	AKAP9_CACNA1H	3283	3129	1047	AKAP9	CACNA1H	protein_coding	protein_coding
Colon Colorectal Cancer.csv	NIPBL_CACNA1H	3078	2877	962	NIPBL	CACNA1H	protein_coding	protein_coding
Colon Colorectal Cancer.csv	PLEKHA6_CACNA1H	3283	3129	1047	PLEKHA6	CACNA1H	protein_coding	protein_coding
Colon Colorectal Cancer.csv	KMT2C_CACNA2D3	3078	2877	962	KMT2C	CACNA2D3	protein_coding	protein_coding
Colon Colorectal Cancer.csv	TTN_CACNA2D3	3078	2877	962	TTN	CACNA2D3	protein_coding	protein_coding
Colon Colorectal Cancer.csv	TTN_CAD	3078	2877	962	TTN	CAD	protein_coding	protein_coding
Colon Colorectal Cancer.csv	KMT2C_CAMSAP2	3510	3377	1147	KMT2C	CAMSAP2	protein_coding	protein_coding
Colon Colorectal Cancer.csv	GPR98_CAMSAP2	3283	3129	1047	GPR98	CAMSAP2	protein_coding	protein_coding
Colon Colorectal Cancer.csv	LRP1B_CAMSAP2	3510	3377	1147	LRP1B	CAMSAP2	protein_coding	protein_coding
Colon Colorectal Cancer.csv	CSMD3_CAMSAP2	3078	2877	962	CSMD3	CAMSAP2	protein_coding	protein_coding
Colon Colorectal Cancer.csv	OBSCN_CAMSAP2	3283	3129	1047	OBSCN	CAMSAP2	protein_coding	protein_coding
Colon Colorectal Cancer.csv	APC_CAMSAP2	3283	3129	1047	APC	CAMSAP2	protein_coding	protein_coding
Colon Colorectal Cancer.csv	ACVR2A_CAMSAP2	3283	3129	1047	ACVR2A	CAMSAP2	protein_coding	protein_coding
Colon Colorectal Cancer.csv	HMCN1_CAMSAP2	3283	3129	1047	HMCN1	CAMSAP2	protein_coding	protein_coding
Colon Colorectal Cancer.csv	SDK1_CAMTA1	3692	3615	1271	SDK1	CAMTA1	protein_coding	protein_coding
Colon Colorectal Cancer.csv	TTN_CCDC73	3078	2877	962	TTN	CCDC73	protein_coding	protein_coding
Colon Colorectal Cancer.csv	MUC16_CCDC73	3078	2877	962	MUC16	CCDC73	protein_coding	protein_coding
Colon Colorectal Cancer.csv	ABCA13_CDH10	3078	2877	962	ABCA13	CDH10	protein_coding	protein_coding
Colon Colorectal Cancer.csv	APC_CDH10	3078	2877	962	APC	CDH10	protein_coding	protein_coding
Colon Colorectal Cancer.csv	GPR98_CDH10	3283	3129	1047	GPR98	CDH10	protein_coding	protein_coding
Colon Colorectal Cancer.csv	PCLO_CDH10	3078	2877	962	PCLO	CDH10	protein_coding	protein_coding
Colon Colorectal Cancer.csv	STAB1_CDH10	3078	2877	962	STAB1	CDH10	protein_coding	protein_coding
Colon Colorectal Cancer.csv	KIF26B_CDH23	3078	2877	962	KIF26B	CDH23	protein_coding	protein_coding
Colon Colorectal Cancer.csv	CIT_CDH23	3283	3129	1047	CIT	CDH23	protein_coding	protein_coding
Colon Colorectal Cancer.csv	GRIK3_CDH23	3078	2877	962	GRIK3	CDH23	protein_coding	protein_coding
Colon Colorectal Cancer.csv	OBSCN_CELSR1	3283	3129	1047	OBSCN	CELSR1	protein_coding	protein_coding
Colon Colorectal Cancer.csv	DST_CELSR1	3283	3129	1047	DST	CELSR1	protein_coding	protein_coding
Colon Colorectal Cancer.csv	WDFY4_CELSR2	3078	2877	962	WDFY4	CELSR2	protein_coding	protein_coding
Colon Colorectal Cancer.csv	HMCN1_CELSR2	3078	2877	962	HMCN1	CELSR2	protein_coding	protein_coding
Colon Colorectal Cancer.csv	POLQ_CELSR2	3078	2877	962	POLQ	CELSR2	protein_coding	protein_coding
Colon Colorectal Cancer.csv	FAT2_CELSR2	3078	2877	962	FAT2	CELSR2	protein_coding	protein_coding
Colon Colorectal Cancer.csv	NIPBL_CELSR2	3078	2877	962	NIPBL	CELSR2	protein_coding	protein_coding
Colon Colorectal Cancer.csv	FSIP2_CELSR2	3078	2877	962	FSIP2	CELSR2	protein_coding	protein_coding
Colon Colorectal Cancer.csv	CACNA1A_CELSR2	3078	2877	962	CACNA1A	CELSR2	protein_coding	protein_coding
Colon Colorectal Cancer.csv	CSMD3_CELSR2	3078	2877	962	CSMD3	CELSR2	protein_coding	protein_coding
Colon Colorectal Cancer.csv	ASCC3_CELSR2	3078	2877	962	ASCC3	CELSR2	protein_coding	protein_coding
Colon Colorectal Cancer.csv	KMT2D_CELSR2	3078	2877	962	KMT2D	CELSR2	protein_coding	protein_coding
Colon Colorectal Cancer.csv	USP34_CELSR2	3078	2877	962	USP34	CELSR2	protein_coding	protein_coding
Colon Colorectal Cancer.csv	LRP2_CELSR2	3078	2877	962	LRP2	CELSR2	protein_coding	protein_coding
Colon Colorectal Cancer.csv	LAMA1_CELSR2	3283	3129	1047	LAMA1	CELSR2	protein_coding	protein_coding
Colon Colorectal Cancer.csv	VPS13D_CELSR2	3078	2877	962	VPS13D	CELSR2	protein_coding	protein_coding
Colon Colorectal Cancer.csv	DNAH7_CELSR2	3283	3129	1047	DNAH7	CELSR2	protein_coding	protein_coding
Colon Colorectal Cancer.csv	LRP1B_CELSR2	3283	3129	1047	LRP1B	CELSR2	protein_coding	protein_coding
Colon Colorectal Cancer.csv	DSCAML1_CELSR2	3078	2877	962	DSCAML1	CELSR2	protein_coding	protein_coding
Colon Colorectal Cancer.csv	DNAH17_CELSR2	3078	2877	962	DNAH17	CELSR2	protein_coding	protein_coding
Colon Colorectal Cancer.csv	APOB_CELSR3	3283	3129	1047	APOB	CELSR3	protein_coding	protein_coding
Colon Colorectal Cancer.csv	MUC4_CELSR3	3510	3377	1147	MUC4	CELSR3	protein_coding	protein_coding
Colon Colorectal Cancer.csv	KMT2C_CELSR3	3510	3377	1147	KMT2C	CELSR3	protein_coding	protein_coding
Colon Colorectal Cancer.csv	LRP1B_CELSR3	3510	3377	1147	LRP1B	CELSR3	protein_coding	protein_coding
Colon Colorectal Cancer.csv	FAT2_CELSR3	3283	3129	1047	FAT2	CELSR3	protein_coding	protein_coding
Colon Colorectal Cancer.csv	DLC1_CELSR3	3283	3129	1047	DLC1	CELSR3	protein_coding	protein_coding
Colon Colorectal Cancer.csv	PCDH10_CELSR3	3510	3377	1147	PCDH10	CELSR3	protein_coding	protein_coding
Colon Colorectal Cancer.csv	CSMD1_CELSR3	3283	3129	1047	CSMD1	CELSR3	protein_coding	protein_coding
Colon Colorectal Cancer.csv	PKD1_CELSR3	3692	3615	1271	PKD1	CELSR3	protein_coding	protein_coding
Colon Colorectal Cancer.csv	SDK1_CELSR3	3510	3377	1147	SDK1	CELSR3	protein_coding	protein_coding
Colon Colorectal Cancer.csv	FAT4_CELSR3	3510	3377	1147	FAT4	CELSR3	protein_coding	protein_coding
Colon Colorectal Cancer.csv	RYR1_CELSR3	3283	3129	1047	RYR1	CELSR3	protein_coding	protein_coding
Colon Colorectal Cancer.csv	ABCA13_CELSR3	3283	3129	1047	ABCA13	CELSR3	protein_coding	protein_coding
Colon Colorectal Cancer.csv	LAMA1_CELSR3	3283	3129	1047	LAMA1	CELSR3	protein_coding	protein_coding
Colon Colorectal Cancer.csv	FSIP2_CELSR3	3283	3129	1047	FSIP2	CELSR3	protein_coding	protein_coding
Colon Colorectal Cancer.csv	LRP1_CELSR3	3510	3377	1147	LRP1	CELSR3	protein_coding	protein_coding
Colon Colorectal Cancer.csv	RYR2_CELSR3	3283	3129	1047	RYR2	CELSR3	protein_coding	protein_coding
Colon Colorectal Cancer.csv	TRRAP_CELSR3	3078	2877	962	TRRAP	CELSR3	protein_coding	protein_coding
Colon Colorectal Cancer.csv	MACF1_CELSR3	3510	3377	1147	MACF1	CELSR3	protein_coding	protein_coding
Colon Colorectal Cancer.csv	RYR2_CEP290	3078	2877	962	RYR2	CEP290	protein_coding	protein_coding
Colon Colorectal Cancer.csv	CDH23_CEP290	3078	2877	962	CDH23	CEP290	protein_coding	protein_coding
Colon Colorectal Cancer.csv	FAT4_CEP290	3078	2877	962	FAT4	CEP290	protein_coding	protein_coding
Colon Colorectal Cancer.csv	DST_CEP350	3283	3129	1047	DST	CEP350	protein_coding	protein_coding
Colon Colorectal Cancer.csv	NEB_CEP350	3510	3377	1147	NEB	CEP350	protein_coding	protein_coding
Colon Colorectal Cancer.csv	APC_CEP350	3283	3129	1047	APC	CEP350	protein_coding	protein_coding
Colon Colorectal Cancer.csv	FAT3_CEP350	3078	2877	962	FAT3	CEP350	protein_coding	protein_coding
Colon Colorectal Cancer.csv	CSMD1_CEP350	3078	2877	962	CSMD1	CEP350	protein_coding	protein_coding
Colon Colorectal Cancer.csv	VPS13C_CEP350	3078	2877	962	VPS13C	CEP350	protein_coding	protein_coding
Colon Colorectal Cancer.csv	APOB_CEP350	3078	2877	962	APOB	CEP350	protein_coding	protein_coding
Colon Colorectal Cancer.csv	LRP2_CEP350	3078	2877	962	LRP2	CEP350	protein_coding	protein_coding
Colon Colorectal Cancer.csv	DNAH7_CEP350	3283	3129	1047	DNAH7	CEP350	protein_coding	protein_coding
Colon Colorectal Cancer.csv	DNAH17_CEP350	3078	2877	962	DNAH17	CEP350	protein_coding	protein_coding
Colon Colorectal Cancer.csv	SYNE1_CEP350	3078	2877	962	SYNE1	CEP350	protein_coding	protein_coding
Colon Colorectal Cancer.csv	LRP1B_CFH	3078	2877	962	LRP1B	CFH	protein_coding	protein_coding
Colon Colorectal Cancer.csv	FAT3_CFH	3078	2877	962	FAT3	CFH	protein_coding	protein_coding
Colon Colorectal Cancer.csv	FAT2_CFH	3078	2877	962	FAT2	CFH	protein_coding	protein_coding
Colon Colorectal Cancer.csv	KMT2C_CFH	3078	2877	962	KMT2C	CFH	protein_coding	protein_coding
Colon Colorectal Cancer.csv	DST_CHD3	1227	1150	465	DST	CHD3	protein_coding	protein_coding
Colon Colorectal Cancer.csv	SDK1_DSCAML1	3510	3377	1147	SDK1	DSCAML1	protein_coding	protein_coding
Colon Colorectal Cancer.csv	KIAA1549_DSCAML1	3510	3377	1147	KIAA1549	DSCAML1	protein_coding	protein_coding
Colon Colorectal Cancer.csv	RYR1_DSCAML1	3283	3129	1047	RYR1	DSCAML1	protein_coding	protein_coding
Colon Colorectal Cancer.csv	DST_DSCAML1	3283	3129	1047	DST	DSCAML1	protein_coding	protein_coding
Colon Colorectal Cancer.csv	LRP2_DSCAML1	3283	3129	1047	LRP2	DSCAML1	protein_coding	protein_coding
Colon Colorectal Cancer.csv	PLEC_DSCAML1	3283	3129	1047	PLEC	DSCAML1	protein_coding	protein_coding
Colon Colorectal Cancer.csv	ASCC3_DSCAML1	3283	3129	1047	ASCC3	DSCAML1	protein_coding	protein_coding
Colon Colorectal Cancer.csv	KMT2C_DSP	3283	3129	1047	KMT2C	DSP	protein_coding	protein_coding
Colon Colorectal Cancer.csv	MUC16_DSP	3078	2877	962	MUC16	DSP	protein_coding	protein_coding
Colon Colorectal Cancer.csv	COL5A1_DST	3283	3129	1047	COL5A1	DST	protein_coding	protein_coding
Colon Colorectal Cancer.csv	LRRK1_DST	3078	2877	962	LRRK1	DST	protein_coding	protein_coding
Colon Colorectal Cancer.csv	PAPPA2_DST	3078	2877	962	PAPPA2	DST	protein_coding	protein_coding
Colon Colorectal Cancer.csv	ZDBF2_DST	3078	2877	962	ZDBF2	DST	protein_coding	protein_coding
Colon Colorectal Cancer.csv	SMG1_DST	3283	3129	1047	SMG1	DST	protein_coding	protein_coding
Colon Colorectal Cancer.csv	BSN_DST	3283	3129	1047	BSN	DST	protein_coding	protein_coding
Colon Colorectal Cancer.csv	GRIK3_DST	3078	2877	962	GRIK3	DST	protein_coding	protein_coding
Colon Colorectal Cancer.csv	GON4L_DST	3283	3129	1047	GON4L	DST	protein_coding	protein_coding
Colon Colorectal Cancer.csv	SMARCA4_DST	3283	3129	1047	SMARCA4	DST	protein_coding	protein_coding
Colon Colorectal Cancer.csv	GPR98_DYNC1H1	3283	3129	1047	GPR98	DYNC1H1	protein_coding	protein_coding
Colon Colorectal Cancer.csv	HMCN1_DYNC1H1	3078	2877	962	HMCN1	DYNC1H1	protein_coding	protein_coding
Colon Colorectal Cancer.csv	ACVR2A_DYNC1H1	3283	3129	1047	ACVR2A	DYNC1H1	protein_coding	protein_coding
Colon Colorectal Cancer.csv	CDH23_DYNC1H1	3078	2877	962	CDH23	DYNC1H1	protein_coding	protein_coding
Colon Colorectal Cancer.csv	PCDH15_DYNC1H1	3283	3129	1047	PCDH15	DYNC1H1	protein_coding	protein_coding
Colon Colorectal Cancer.csv	PRRC2C_DYNC1H1	3283	3129	1047	PRRC2C	DYNC1H1	protein_coding	protein_coding
Colon Colorectal Cancer.csv	FAT4_DYNC1H1	3078	2877	962	FAT4	DYNC1H1	protein_coding	protein_coding
Colon Colorectal Cancer.csv	ZFHX4_DYNC2H1	3078	2877	962	ZFHX4	DYNC2H1	protein_coding	protein_coding
Colon Colorectal Cancer.csv	EYS_DYNC2H1	3078	2877	962	EYS	DYNC2H1	protein_coding	protein_coding
Colon Colorectal Cancer.csv	NEB_DYNC2H1	3510	3377	1147	NEB	DYNC2H1	protein_coding	protein_coding
Colon Colorectal Cancer.csv	SVIL_DYNC2H1	3283	3129	1047	SVIL	DYNC2H1	protein_coding	protein_coding
Colon Colorectal Cancer.csv	BRCA2_DYNC2H1	3078	2877	962	BRCA2	DYNC2H1	protein_coding	protein_coding
Colon Colorectal Cancer.csv	PLEC_DYNC2H1	3283	3129	1047	PLEC	DYNC2H1	protein_coding	protein_coding
Colon Colorectal Cancer.csv	CDH23_DYNC2H1	3283	3129	1047	CDH23	DYNC2H1	protein_coding	protein_coding
Colon Colorectal Cancer.csv	GNAS_DYNC2H1	3078	2877	962	GNAS	DYNC2H1	protein_coding	protein_coding
Colon Colorectal Cancer.csv	APC2_DYSF	3078	2877	962	APC2	DYSF	protein_coding	protein_coding
Colon Colorectal Cancer.csv	NEB_DYSF	3078	2877	962	NEB	DYSF	protein_coding	protein_coding
Colon Colorectal Cancer.csv	MUC5B_DYSF	3078	2877	962	MUC5B	DYSF	protein_coding	protein_coding
Colon Colorectal Cancer.csv	MUC4_DYSF	3078	2877	962	MUC4	DYSF	protein_coding	protein_coding
Colon Colorectal Cancer.csv	LRP1B_DYSF	3078	2877	962	LRP1B	DYSF	protein_coding	protein_coding
Colon Colorectal Cancer.csv	TTN_EFR3A	3283	3129	1047	TTN	EFR3A	protein_coding	protein_coding
Colon Colorectal Cancer.csv	SRCAP_EIF4G1	3078	2877	962	SRCAP	EIF4G1	protein_coding	protein_coding
Colon Colorectal Cancer.csv	ACVR2A_EIF5B	3283	3129	1047	ACVR2A	EIF5B	protein_coding	protein_coding
Colon Colorectal Cancer.csv	FAT3_EIF5B	3078	2877	962	FAT3	EIF5B	protein_coding	protein_coding
Colon Colorectal Cancer.csv	DST_EIF5B	3078	2877	962	DST	EIF5B	protein_coding	protein_coding
Colon Colorectal Cancer.csv	MUC16_EIF5B	3078	2877	962	MUC16	EIF5B	protein_coding	protein_coding
Colon Colorectal Cancer.csv	MUC5B_EIF5B	3078	2877	962	MUC5B	EIF5B	protein_coding	protein_coding
Colon Colorectal Cancer.csv	SYNE2_EIF5B	3078	2877	962	SYNE2	EIF5B	protein_coding	protein_coding
Colon Colorectal Cancer.csv	SYNE1_EIF5B	3078	2877	962	SYNE1	EIF5B	protein_coding	protein_coding
Colon Colorectal Cancer.csv	TRRAP_EP300	3078	2877	962	TRRAP	EP300	protein_coding	protein_coding
Colon Colorectal Cancer.csv	EYS_EP300	3078	2877	962	EYS	EP300	protein_coding	protein_coding
Colon Colorectal Cancer.csv	WDFY4_EP300	3078	2877	962	WDFY4	EP300	protein_coding	protein_coding
Colon Colorectal Cancer.csv	DYNC2H1_EP300	3078	2877	962	DYNC2H1	EP300	protein_coding	protein_coding
Colon Colorectal Cancer.csv	PIK3CA_EP300	3510	3377	1147	PIK3CA	EP300	protein_coding	protein_coding
Colon Colorectal Cancer.csv	DLC1_EP300	3078	2877	962	DLC1	EP300	protein_coding	protein_coding
Colon Colorectal Cancer.csv	NCOR1_EP300	3283	3129	1047	NCOR1	EP300	protein_coding	protein_coding
Colon Colorectal Cancer.csv	ZFHX3_EP300	3078	2877	962	ZFHX3	EP300	protein_coding	protein_coding
Colon Colorectal Cancer.csv	VPS13D_EP300	3078	2877	962	VPS13D	EP300	protein_coding	protein_coding
Colon Colorectal Cancer.csv	UNC13C_EP300	3078	2877	962	UNC13C	EP300	protein_coding	protein_coding
Colon Colorectal Cancer.csv	SACS_EP300	3078	2877	962	SACS	EP300	protein_coding	protein_coding
Colon Colorectal Cancer.csv	MUC5B_EP300	3283	3129	1047	MUC5B	EP300	protein_coding	protein_coding
Colon Colorectal Cancer.csv	ZNF536_EP300	3078	2877	962	ZNF536	EP300	protein_coding	protein_coding
Colon Colorectal Cancer.csv	MUC4_EP300	3283	3129	1047	MUC4	EP300	protein_coding	protein_coding
Colon Colorectal Cancer.csv	MUC4_EP400	3078	2877	962	MUC4	EP400	protein_coding	protein_coding
Colon Colorectal Cancer.csv	ZFHX3_EP400	3078	2877	962	ZFHX3	EP400	protein_coding	protein_coding
Colon Colorectal Cancer.csv	PKD1_EP400	3283	3129	1047	PKD1	EP400	protein_coding	protein_coding
Colon Colorectal Cancer.csv	FAT3_EP400	3078	2877	962	FAT3	EP400	protein_coding	protein_coding
Colon Colorectal Cancer.csv	CSMD2_EP400	3510	3377	1147	CSMD2	EP400	protein_coding	protein_coding
Colon Colorectal Cancer.csv	USP34_EP400	3078	2877	962	USP34	EP400	protein_coding	protein_coding
Colon Colorectal Cancer.csv	LRP1B_EPHA5	3283	3129	1047	LRP1B	EPHA5	protein_coding	protein_coding
Colon Colorectal Cancer.csv	MACF1_EPHA5	3283	3129	1047	MACF1	EPHA5	protein_coding	protein_coding
Colon Colorectal Cancer.csv	RYR1_EPHA5	3283	3129	1047	RYR1	EPHA5	protein_coding	protein_coding
Colon Colorectal Cancer.csv	HMCN1_EPHA5	3283	3129	1047	HMCN1	EPHA5	protein_coding	protein_coding
Colon Colorectal Cancer.csv	RYR2_EPHA5	3283	3129	1047	RYR2	EPHA5	protein_coding	protein_coding
Colon Colorectal Cancer.csv	MUC16_EPHA5	3283	3129	1047	MUC16	EPHA5	protein_coding	protein_coding
Colon Colorectal Cancer.csv	OBSCN_EPHA5	3283	3129	1047	OBSCN	EPHA5	protein_coding	protein_coding
Colon Colorectal Cancer.csv	LRP1_EPHA5	3078	2877	962	LRP1	EPHA5	protein_coding	protein_coding
Colon Colorectal Cancer.csv	CDH23_EPPK1	3283	3129	1047	CDH23	EPPK1	protein_coding	protein_coding
Colon Colorectal Cancer.csv	DST_EPPK1	3283	3129	1047	DST	EPPK1	protein_coding	protein_coding
Colon Colorectal Cancer.csv	SYNE2_EPPK1	3078	2877	962	SYNE2	EPPK1	protein_coding	protein_coding
Colon Colorectal Cancer.csv	KMT2D_ESRP1	3078	2877	962	KMT2D	ESRP1	protein_coding	protein_coding
Colon Colorectal Cancer.csv	CSMD1_ESRP1	3078	2877	962	CSMD1	ESRP1	protein_coding	protein_coding
Colon Colorectal Cancer.csv	SYNE1_ESRP1	3078	2877	962	SYNE1	ESRP1	protein_coding	protein_coding
Colon Colorectal Cancer.csv	SYNE2_ESRP1	3078	2877	962	SYNE2	ESRP1	protein_coding	protein_coding
Colon Colorectal Cancer.csv	HMCN1_ESRP1	3078	2877	962	HMCN1	ESRP1	protein_coding	protein_coding
Colon Colorectal Cancer.csv	FSIP2_ESRP1	3078	2877	962	FSIP2	ESRP1	protein_coding	protein_coding
Colon Colorectal Cancer.csv	UBR5_ESRP1	3078	2877	962	UBR5	ESRP1	protein_coding	protein_coding
Colon Colorectal Cancer.csv	FAT3_ESRP1	3078	2877	962	FAT3	ESRP1	protein_coding	protein_coding
Colon Colorectal Cancer.csv	HTT_EYS	3078	2877	962	HTT	EYS	protein_coding	protein_coding
Colon Colorectal Cancer.csv	SALL3_EYS	3078	2877	962	SALL3	EYS	protein_coding	protein_coding
Colon Colorectal Cancer.csv	NOTCH3_EYS	3078	2877	962	NOTCH3	EYS	protein_coding	protein_coding
Colon Colorectal Cancer.csv	ZNF536_EYS	3283	3129	1047	ZNF536	EYS	protein_coding	protein_coding
Colon Colorectal Cancer.csv	PCDH15_F8	3283	3129	1047	PCDH15	F8	protein_coding	protein_coding
Colon Colorectal Cancer.csv	KMT2C_F8	3283	3129	1047	KMT2C	F8	protein_coding	protein_coding
Colon Colorectal Cancer.csv	NEB_F8	3283	3129	1047	NEB	F8	protein_coding	protein_coding
Colon Colorectal Cancer.csv	SYNE1_F8	3078	2877	962	SYNE1	F8	protein_coding	protein_coding
Colon Colorectal Cancer.csv	DNAH7_F8	3078	2877	962	DNAH7	F8	protein_coding	protein_coding
Colon Colorectal Cancer.csv	RYR3_F8	3283	3129	1047	RYR3	F8	protein_coding	protein_coding
Colon Colorectal Cancer.csv	BMPR2_FANCA	3078	2877	962	BMPR2	FANCA	protein_coding	protein_coding
Colon Colorectal Cancer.csv	OBSCN_FANCA	3078	2877	962	OBSCN	FANCA	protein_coding	protein_coding
Colon Colorectal Cancer.csv	HMCN1_FASN	3078	2877	962	HMCN1	FASN	protein_coding	protein_coding
Colon Colorectal Cancer.csv	DNAH7_FASN	3078	2877	962	DNAH7	FASN	protein_coding	protein_coding
Colon Colorectal Cancer.csv	PCDH15_FASN	3078	2877	962	PCDH15	FASN	protein_coding	protein_coding
Colon Colorectal Cancer.csv	DLC1_FASN	3078	2877	962	DLC1	FASN	protein_coding	protein_coding
Colon Colorectal Cancer.csv	RYR3_FASN	3078	2877	962	RYR3	FASN	protein_coding	protein_coding
Colon Colorectal Cancer.csv	VWF_FASN	3078	2877	962	VWF	FASN	protein_coding	protein_coding
Colon Colorectal Cancer.csv	HERC2_FASN	3078	2877	962	HERC2	FASN	protein_coding	protein_coding
Colon Colorectal Cancer.csv	EP300_FAT1	3078	2877	962	EP300	FAT1	protein_coding	protein_coding
Colon Colorectal Cancer.csv	TENM3_FAT1	3283	3129	1047	TENM3	FAT1	protein_coding	protein_coding
Colon Colorectal Cancer.csv	KMT2D_FAT1	3078	2877	962	KMT2D	FAT1	protein_coding	protein_coding
Colon Colorectal Cancer.csv	ROBO1_FAT1	3078	2877	962	ROBO1	FAT1	protein_coding	protein_coding
Colon Colorectal Cancer.csv	LRP1_FAT1	3283	3129	1047	LRP1	FAT1	protein_coding	protein_coding
Colon Colorectal Cancer.csv	LRP1B_FAT1	3283	3129	1047	LRP1B	FAT1	protein_coding	protein_coding
Colon Colorectal Cancer.csv	GNAS_FAT1	3078	2877	962	GNAS	FAT1	protein_coding	protein_coding
Colon Colorectal Cancer.csv	FREM2_FAT1	3078	2877	962	FREM2	FAT1	protein_coding	protein_coding
Colon Colorectal Cancer.csv	DISP1_FAT2	3078	2877	962	DISP1	FAT2	protein_coding	protein_coding
Colon Colorectal Cancer.csv	C12orf55_FAT2	3283	3129	1047	C12orf55	FAT2	protein_coding	protein_coding
Colon Colorectal Cancer.csv	DMD_FAT2	3283	3129	1047	DMD	FAT2	protein_coding	protein_coding
Colon Colorectal Cancer.csv	MYO9B_FAT2	3078	2877	962	MYO9B	FAT2	protein_coding	protein_coding
Colon Colorectal Cancer.csv	ROBO1_FAT2	3078	2877	962	ROBO1	FAT2	protein_coding	protein_coding
Colon Colorectal Cancer.csv	TG_FAT2	3078	2877	962	TG	FAT2	protein_coding	protein_coding
Colon Colorectal Cancer.csv	PCDHA13_FAT2	3078	2877	962	PCDHA13	FAT2	protein_coding	protein_coding
Colon Colorectal Cancer.csv	SMARCA4_FAT2	3283	3129	1047	SMARCA4	FAT2	protein_coding	protein_coding
Colon Colorectal Cancer.csv	PRKDC_FAT2	3078	2877	962	PRKDC	FAT2	protein_coding	protein_coding
Colon Colorectal Cancer.csv	FBXW7_FAT2	3283	3129	1047	FBXW7	FAT2	protein_coding	protein_coding
Colon Colorectal Cancer.csv	PLXNA2_FAT2	3078	2877	962	PLXNA2	FAT2	protein_coding	protein_coding
Colon Colorectal Cancer.csv	SCRIB_FAT2	3283	3129	1047	SCRIB	FAT2	protein_coding	protein_coding
Colon Colorectal Cancer.csv	PKHD1L1_FAT2	3283	3129	1047	PKHD1L1	FAT2	protein_coding	protein_coding
Colon Colorectal Cancer.csv	ZNF536_FAT2	3078	2877	962	ZNF536	FAT2	protein_coding	protein_coding
Colon Colorectal Cancer.csv	PKD1L1_FAT2	3078	2877	962	PKD1L1	FAT2	protein_coding	protein_coding
Colon Colorectal Cancer.csv	CHD3_FAT2	3078	2877	962	CHD3	FAT2	protein_coding	protein_coding
Colon Colorectal Cancer.csv	AFF2_FAT2	3078	2877	962	AFF2	FAT2	protein_coding	protein_coding
Colon Colorectal Cancer.csv	GRIK3_FAT3	3078	2877	962	GRIK3	FAT3	protein_coding	protein_coding
Colon Colorectal Cancer.csv	PXDNL_FAT3	3078	2877	962	PXDNL	FAT3	protein_coding	protein_coding
Colon Colorectal Cancer.csv	CACNA1E_FAT3	3283	3129	1047	CACNA1E	FAT3	protein_coding	protein_coding
Colon Colorectal Cancer.csv	KRAS_FAT3	3078	2877	962	KRAS	FAT3	protein_coding	protein_coding
Colon Colorectal Cancer.csv	BRAF_FAT3	3078	2877	962	BRAF	FAT3	protein_coding	protein_coding
Colon Colorectal Cancer.csv	CSMD2_FAT3	3510	3377	1147	CSMD2	FAT3	protein_coding	protein_coding
Colon Colorectal Cancer.csv	CACNA1E_FAT4	3283	3129	1047	CACNA1E	FAT4	protein_coding	protein_coding
Colon Colorectal Cancer.csv	ZDBF2_FAT4	3078	2877	962	ZDBF2	FAT4	protein_coding	protein_coding
Colon Colorectal Cancer.csv	LMO7_FAT4	3510	3377	1147	LMO7	FAT4	protein_coding	protein_coding
Colon Colorectal Cancer.csv	NEB_FBN2	3283	3129	1047	NEB	FBN2	protein_coding	protein_coding
Colon Colorectal Cancer.csv	GPR98_FBN2	3283	3129	1047	GPR98	FBN2	protein_coding	protein_coding
Colon Colorectal Cancer.csv	OBSCN_FBN2	3078	2877	962	OBSCN	FBN2	protein_coding	protein_coding
Colon Colorectal Cancer.csv	SVIL_FBN3	3078	2877	962	SVIL	FBN3	protein_coding	protein_coding
Colon Colorectal Cancer.csv	APOB_FBN3	3078	2877	962	APOB	FBN3	protein_coding	protein_coding
Colon Colorectal Cancer.csv	TRRAP_FBN3	3078	2877	962	TRRAP	FBN3	protein_coding	protein_coding
Colon Colorectal Cancer.csv	TENM3_FBN3	3510	3377	1147	TENM3	FBN3	protein_coding	protein_coding
Colon Colorectal Cancer.csv	ZNF536_FBN3	3510	3377	1147	ZNF536	FBN3	protein_coding	protein_coding
Colon Colorectal Cancer.csv	IRS1_FBN3	3283	3129	1047	IRS1	FBN3	protein_coding	protein_coding
Colon Colorectal Cancer.csv	ZFHX3_FBN3	3283	3129	1047	ZFHX3	FBN3	protein_coding	protein_coding
Colon Colorectal Cancer.csv	STAB1_FBN3	3510	3377	1147	STAB1	FBN3	protein_coding	protein_coding
Colon Colorectal Cancer.csv	RYR3_FBN3	3510	3377	1147	RYR3	FBN3	protein_coding	protein_coding
Colon Colorectal Cancer.csv	MUC4_FBN3	3510	3377	1147	MUC4	FBN3	protein_coding	protein_coding
Colon Colorectal Cancer.csv	BMPR2_FBN3	3283	3129	1047	BMPR2	FBN3	protein_coding	protein_coding
Colon Colorectal Cancer.csv	DLC1_FBN3	3283	3129	1047	DLC1	FBN3	protein_coding	protein_coding
Colon Colorectal Cancer.csv	RYR1_FBN3	3283	3129	1047	RYR1	FBN3	protein_coding	protein_coding
Colon Colorectal Cancer.csv	RYR2_FBN3	3283	3129	1047	RYR2	FBN3	protein_coding	protein_coding
Colon Colorectal Cancer.csv	USP34_FBN3	3283	3129	1047	USP34	FBN3	protein_coding	protein_coding
Colon Colorectal Cancer.csv	ACVR2A_FBN3	3692	3615	1271	ACVR2A	FBN3	protein_coding	protein_coding
Colon Colorectal Cancer.csv	PLEC_FBN3	3283	3129	1047	PLEC	FBN3	protein_coding	protein_coding
Colon Colorectal Cancer.csv	FAT3_FBXW7	3078	2877	962	FAT3	FBXW7	protein_coding	protein_coding
Colon Colorectal Cancer.csv	SYNE2_FBXW7	3283	3129	1047	SYNE2	FBXW7	protein_coding	protein_coding
Colon Colorectal Cancer.csv	KRAS_FBXW7	3078	2877	962	KRAS	FBXW7	protein_coding	protein_coding
Colon Colorectal Cancer.csv	DNAH7_FBXW7	3283	3129	1047	DNAH7	FBXW7	protein_coding	protein_coding
Colon Colorectal Cancer.csv	KMT2C_FBXW7	3283	3129	1047	KMT2C	FBXW7	protein_coding	protein_coding
Colon Colorectal Cancer.csv	GPR98_FCGBP	3078	2877	962	GPR98	FCGBP	protein_coding	protein_coding
Colon Colorectal Cancer.csv	PKD1_FCGBP	3078	2877	962	PKD1	FCGBP	protein_coding	protein_coding
Colon Colorectal Cancer.csv	TTN_FGD5	3283	3129	1047	TTN	FGD5	protein_coding	protein_coding
Colon Colorectal Cancer.csv	OBSCN_FGD5	3283	3129	1047	OBSCN	FGD5	protein_coding	protein_coding
Colon Colorectal Cancer.csv	MUC16_FGD5	3283	3129	1047	MUC16	FGD5	protein_coding	protein_coding
Colon Colorectal Cancer.csv	ADAMTSL1_FLG	3078	2877	962	ADAMTSL1	FLG	protein_coding	protein_coding
Colon Colorectal Cancer.csv	EIF4G1_FLG	3078	2877	962	EIF4G1	FLG	protein_coding	protein_coding
Colon Colorectal Cancer.csv	RIF1_FLG	3078	2877	962	RIF1	FLG	protein_coding	protein_coding
Colon Colorectal Cancer.csv	KMT2C_FLNC	3283	3129	1047	KMT2C	FLNC	protein_coding	protein_coding
Colon Colorectal Cancer.csv	ACVR2A_FLNC	3510	3377	1147	ACVR2A	FLNC	protein_coding	protein_coding
Colon Colorectal Cancer.csv	DST_FLNC	3510	3377	1147	DST	FLNC	protein_coding	protein_coding
Colon Colorectal Cancer.csv	FSIP2_FLNC	3510	3377	1147	FSIP2	FLNC	protein_coding	protein_coding
Colon Colorectal Cancer.csv	KMT2C_FMN2	3078	2877	962	KMT2C	FMN2	protein_coding	protein_coding
Colon Colorectal Cancer.csv	GPR98_FOLH1	3510	3377	1147	GPR98	FOLH1	protein_coding	protein_coding
Colon Colorectal Cancer.csv	LRP1B_FREM1	3510	3377	1147	LRP1B	FREM1	protein_coding	protein_coding
Colon Colorectal Cancer.csv	NEB_FREM1	3510	3377	1147	NEB	FREM1	protein_coding	protein_coding
Colon Colorectal Cancer.csv	APC_FREM1	3510	3377	1147	APC	FREM1	protein_coding	protein_coding
Colon Colorectal Cancer.csv	DST_FREM1	3510	3377	1147	DST	FREM1	protein_coding	protein_coding
Colon Colorectal Cancer.csv	KMT2C_FREM1	3692	3615	1271	KMT2C	FREM1	protein_coding	protein_coding
Colon Colorectal Cancer.csv	SDK1_FREM1	3510	3377	1147	SDK1	FREM1	protein_coding	protein_coding
Colon Colorectal Cancer.csv	FAT2_FREM1	3510	3377	1147	FAT2	FREM1	protein_coding	protein_coding
Colon Colorectal Cancer.csv	FAT3_FREM1	3510	3377	1147	FAT3	FREM1	protein_coding	protein_coding
Colon Colorectal Cancer.csv	MAP3K4_FREM2	3078	2877	962	MAP3K4	FREM2	protein_coding	protein_coding
Colon Colorectal Cancer.csv	NEB_FREM2	3510	3377	1147	NEB	FREM2	protein_coding	protein_coding
Colon Colorectal Cancer.csv	CACNA1E_FREM2	3078	2877	962	CACNA1E	FREM2	protein_coding	protein_coding
Colon Colorectal Cancer.csv	PLEC_FREM2	3078	2877	962	PLEC	FREM2	protein_coding	protein_coding
Colon Colorectal Cancer.csv	CDH23_FREM2	3078	2877	962	CDH23	FREM2	protein_coding	protein_coding
Colon Colorectal Cancer.csv	RIF1_FREM2	3283	3129	1047	RIF1	FREM2	protein_coding	protein_coding
Colon Colorectal Cancer.csv	TPR_FREM2	3078	2877	962	TPR	FREM2	protein_coding	protein_coding
Colon Colorectal Cancer.csv	DOPEY2_FREM2	3078	2877	962	DOPEY2	FREM2	protein_coding	protein_coding
Colon Colorectal Cancer.csv	VPS13C_FREM2	3078	2877	962	VPS13C	FREM2	protein_coding	protein_coding
Colon Colorectal Cancer.csv	C12orf55_FREM2	3078	2877	962	C12orf55	FREM2	protein_coding	protein_coding
Colon Colorectal Cancer.csv	DNAH10_FREM2	3078	2877	962	DNAH10	FREM2	protein_coding	protein_coding
Colon Colorectal Cancer.csv	ZFHX3_FREM2	3078	2877	962	ZFHX3	FREM2	protein_coding	protein_coding
Colon Colorectal Cancer.csv	TTN_FRMPD1	3283	3129	1047	TTN	FRMPD1	protein_coding	protein_coding
Colon Colorectal Cancer.csv	NCOR2_FRY	3078	2877	962	NCOR2	FRY	protein_coding	protein_coding
Colon Colorectal Cancer.csv	SETD1B_FSIP2	3283	3129	1047	SETD1B	FSIP2	protein_coding	protein_coding
Colon Colorectal Cancer.csv	PCDHA13_FSIP2	3078	2877	962	PCDHA13	FSIP2	protein_coding	protein_coding
Colon Colorectal Cancer.csv	AHNAK2_FSIP2	3283	3129	1047	AHNAK2	FSIP2	protein_coding	protein_coding
Colon Colorectal Cancer.csv	TENM4_FSIP2	3510	3377	1147	TENM4	FSIP2	protein_coding	protein_coding
Colon Colorectal Cancer.csv	BSN_FSIP2	3078	2877	962	BSN	FSIP2	protein_coding	protein_coding
Colon Colorectal Cancer.csv	TNXB_FSIP2	3078	2877	962	TNXB	FSIP2	protein_coding	protein_coding
Colon Colorectal Cancer.csv	SLITRK5_FSIP2	3078	2877	962	SLITRK5	FSIP2	protein_coding	protein_coding
Colon Colorectal Cancer.csv	ARHGEF17_FSIP2	3078	2877	962	ARHGEF17	FSIP2	protein_coding	protein_coding
Colon Colorectal Cancer.csv	GSE1_FSIP2	3078	2877	962	GSE1	FSIP2	protein_coding	protein_coding
Colon Colorectal Cancer.csv	PRKDC_FSIP2	3078	2877	962	PRKDC	FSIP2	protein_coding	protein_coding
Colon Colorectal Cancer.csv	CAMSAP2_FSIP2	3283	3129	1047	CAMSAP2	FSIP2	protein_coding	protein_coding
Colon Colorectal Cancer.csv	COL22A1_FSIP2	3283	3129	1047	COL22A1	FSIP2	protein_coding	protein_coding
Colon Colorectal Cancer.csv	LMO7_FSIP2	3692	3615	1271	LMO7	FSIP2	protein_coding	protein_coding
Colon Colorectal Cancer.csv	ASPM_FSIP2	1227	1150	465	ASPM	FSIP2	protein_coding	protein_coding
Colon Colorectal Cancer.csv	FBN2_LRP1B	3078	2877	962	FBN2	LRP1B	protein_coding	protein_coding
Colon Colorectal Cancer.csv	PLXNA2_LRP1B	3078	2877	962	PLXNA2	LRP1B	protein_coding	protein_coding
Colon Colorectal Cancer.csv	DNAH10_LRP1B	3078	2877	962	DNAH10	LRP1B	protein_coding	protein_coding
Colon Colorectal Cancer.csv	CACNA1E_LRP1B	3283	3129	1047	CACNA1E	LRP1B	protein_coding	protein_coding
Colon Colorectal Cancer.csv	TECTA_LRP1B	3283	3129	1047	TECTA	LRP1B	protein_coding	protein_coding
Colon Colorectal Cancer.csv	COL6A3_LRP1B	3510	3377	1147	COL6A3	LRP1B	protein_coding	protein_coding
Colon Colorectal Cancer.csv	N4BP2_LRP1B	3283	3129	1047	N4BP2	LRP1B	protein_coding	protein_coding
Colon Colorectal Cancer.csv	CDH23_LRP2	3283	3129	1047	CDH23	LRP2	protein_coding	protein_coding
Colon Colorectal Cancer.csv	RIF1_LRP2	3078	2877	962	RIF1	LRP2	protein_coding	protein_coding
Colon Colorectal Cancer.csv	TECTA_LRP2	3078	2877	962	TECTA	LRP2	protein_coding	protein_coding
Colon Colorectal Cancer.csv	SACS_LRP2	3078	2877	962	SACS	LRP2	protein_coding	protein_coding
Colon Colorectal Cancer.csv	DOPEY2_LRP2	3078	2877	962	DOPEY2	LRP2	protein_coding	protein_coding
Colon Colorectal Cancer.csv	WDR33_LRP2	3283	3129	1047	WDR33	LRP2	protein_coding	protein_coding
Colon Colorectal Cancer.csv	LRP1_LRRK2	3283	3129	1047	LRP1	LRRK2	protein_coding	protein_coding
Colon Colorectal Cancer.csv	PCDH15_LRRK2	3283	3129	1047	PCDH15	LRRK2	protein_coding	protein_coding
Colon Colorectal Cancer.csv	SVIL_LRRK2	3078	2877	962	SVIL	LRRK2	protein_coding	protein_coding
Colon Colorectal Cancer.csv	ACVR2A_LRRK2	3283	3129	1047	ACVR2A	LRRK2	protein_coding	protein_coding
Colon Colorectal Cancer.csv	AFF2_LRRK2	3078	2877	962	AFF2	LRRK2	protein_coding	protein_coding
Colon Colorectal Cancer.csv	RIF1_LRRK2	3510	3377	1147	RIF1	LRRK2	protein_coding	protein_coding
Colon Colorectal Cancer.csv	LRP2_LRRK2	3283	3129	1047	LRP2	LRRK2	protein_coding	protein_coding
Colon Colorectal Cancer.csv	PKHD1L1_LRRK2	3283	3129	1047	PKHD1L1	LRRK2	protein_coding	protein_coding
Colon Colorectal Cancer.csv	EP400_LRRK2	3283	3129	1047	EP400	LRRK2	protein_coding	protein_coding
Colon Colorectal Cancer.csv	PCDH10_LRRK2	3283	3129	1047	PCDH10	LRRK2	protein_coding	protein_coding
Colon Colorectal Cancer.csv	PLEC_LRRK2	3078	2877	962	PLEC	LRRK2	protein_coding	protein_coding
Colon Colorectal Cancer.csv	NAV3_LRRK2	3078	2877	962	NAV3	LRRK2	protein_coding	protein_coding
Colon Colorectal Cancer.csv	CACNA1A_LRRK2	3283	3129	1047	CACNA1A	LRRK2	protein_coding	protein_coding
Colon Colorectal Cancer.csv	VWF_LRRK2	3283	3129	1047	VWF	LRRK2	protein_coding	protein_coding
Colon Colorectal Cancer.csv	LRP1B_LRRK2	3510	3377	1147	LRP1B	LRRK2	protein_coding	protein_coding
Colon Colorectal Cancer.csv	DLC1_LRRK2	3078	2877	962	DLC1	LRRK2	protein_coding	protein_coding
Colon Colorectal Cancer.csv	COL6A3_LRRK2	3078	2877	962	COL6A3	LRRK2	protein_coding	protein_coding
Colon Colorectal Cancer.csv	DNAH9_LRRK2	3078	2877	962	DNAH9	LRRK2	protein_coding	protein_coding
Colon Colorectal Cancer.csv	FREM2_LRRK2	3078	2877	962	FREM2	LRRK2	protein_coding	protein_coding
Colon Colorectal Cancer.csv	SDK1_LYST	3078	2877	962	SDK1	LYST	protein_coding	protein_coding
Colon Colorectal Cancer.csv	NEB_LYST	3283	3129	1047	NEB	LYST	protein_coding	protein_coding
Colon Colorectal Cancer.csv	ZFHX3_LYST	3078	2877	962	ZFHX3	LYST	protein_coding	protein_coding
Colon Colorectal Cancer.csv	CDH23_LYST	3078	2877	962	CDH23	LYST	protein_coding	protein_coding
Colon Colorectal Cancer.csv	ACVR2A_LYST	3078	2877	962	ACVR2A	LYST	protein_coding	protein_coding
Colon Colorectal Cancer.csv	EIF4G1_LYST	3078	2877	962	EIF4G1	LYST	protein_coding	protein_coding
Colon Colorectal Cancer.csv	RIF1_LYST	3078	2877	962	RIF1	LYST	protein_coding	protein_coding
Colon Colorectal Cancer.csv	HERC2_LYST	3078	2877	962	HERC2	LYST	protein_coding	protein_coding
Colon Colorectal Cancer.csv	EIF4G1_MACF1	3078	2877	962	EIF4G1	MACF1	protein_coding	protein_coding
Colon Colorectal Cancer.csv	SPEG_MACF1	3078	2877	962	SPEG	MACF1	protein_coding	protein_coding
Colon Colorectal Cancer.csv	CACNA1E_MACF1	3283	3129	1047	CACNA1E	MACF1	protein_coding	protein_coding
Colon Colorectal Cancer.csv	TPR_MACF1	3078	2877	962	TPR	MACF1	protein_coding	protein_coding
Colon Colorectal Cancer.csv	DCHS1_MACF1	3510	3377	1147	DCHS1	MACF1	protein_coding	protein_coding
Colon Colorectal Cancer.csv	TNXB_MACF1	3078	2877	962	TNXB	MACF1	protein_coding	protein_coding
Colon Colorectal Cancer.csv	ZFHX3_MACF1	3078	2877	962	ZFHX3	MACF1	protein_coding	protein_coding
Colon Colorectal Cancer.csv	DCHS2_MACF1	3283	3129	1047	DCHS2	MACF1	protein_coding	protein_coding
Colon Colorectal Cancer.csv	NCKAP5_MACF1	3283	3129	1047	NCKAP5	MACF1	protein_coding	protein_coding
Colon Colorectal Cancer.csv	KMT2C_MAGI2	3078	2877	962	KMT2C	MAGI2	protein_coding	protein_coding
Colon Colorectal Cancer.csv	OBSCN_MAGI2	3078	2877	962	OBSCN	MAGI2	protein_coding	protein_coding
Colon Colorectal Cancer.csv	MUC4_MAGI2	3078	2877	962	MUC4	MAGI2	protein_coding	protein_coding
Colon Colorectal Cancer.csv	APC_MAGI2	3283	3129	1047	APC	MAGI2	protein_coding	protein_coding
Colon Colorectal Cancer.csv	SYNE1_MAGI2	3078	2877	962	SYNE1	MAGI2	protein_coding	protein_coding
Colon Colorectal Cancer.csv	OBSCN_MAN2A1	3510	3377	1147	OBSCN	MAN2A1	protein_coding	protein_coding
Colon Colorectal Cancer.csv	MUC16_MAN2A1	3510	3377	1147	MUC16	MAN2A1	protein_coding	protein_coding
Colon Colorectal Cancer.csv	DST_MAN2A1	3510	3377	1147	DST	MAN2A1	protein_coding	protein_coding
Colon Colorectal Cancer.csv	KMT2C_MAN2A1	3510	3377	1147	KMT2C	MAN2A1	protein_coding	protein_coding
Colon Colorectal Cancer.csv	MUC4_MAP1B	3283	3129	1047	MUC4	MAP1B	protein_coding	protein_coding
Colon Colorectal Cancer.csv	SYNE2_MAP1B	3078	2877	962	SYNE2	MAP1B	protein_coding	protein_coding
Colon Colorectal Cancer.csv	OBSCN_MAP1B	3078	2877	962	OBSCN	MAP1B	protein_coding	protein_coding
Colon Colorectal Cancer.csv	KMT2C_MAP2	3283	3129	1047	KMT2C	MAP2	protein_coding	protein_coding
Colon Colorectal Cancer.csv	DNAH7_MAP2	3078	2877	962	DNAH7	MAP2	protein_coding	protein_coding
Colon Colorectal Cancer.csv	CDH23_MAP3K4	3078	2877	962	CDH23	MAP3K4	protein_coding	protein_coding
Colon Colorectal Cancer.csv	HERC2_MAP3K4	3078	2877	962	HERC2	MAP3K4	protein_coding	protein_coding
Colon Colorectal Cancer.csv	ROBO1_MAP3K4	3078	2877	962	ROBO1	MAP3K4	protein_coding	protein_coding
Colon Colorectal Cancer.csv	EYS_MAP3K4	3078	2877	962	EYS	MAP3K4	protein_coding	protein_coding
Colon Colorectal Cancer.csv	RIF1_MAP3K4	3078	2877	962	RIF1	MAP3K4	protein_coding	protein_coding
Colon Colorectal Cancer.csv	APC_MCM2	3078	2877	962	APC	MCM2	protein_coding	protein_coding
Colon Colorectal Cancer.csv	PLXNA4_MDN1	3283	3129	1047	PLXNA4	MDN1	protein_coding	protein_coding
Colon Colorectal Cancer.csv	BRCA2_MDN1	3283	3129	1047	BRCA2	MDN1	protein_coding	protein_coding
Colon Colorectal Cancer.csv	RIF1_MDN1	3510	3377	1147	RIF1	MDN1	protein_coding	protein_coding
Colon Colorectal Cancer.csv	ARHGEF17_MDN1	3283	3129	1047	ARHGEF17	MDN1	protein_coding	protein_coding
Colon Colorectal Cancer.csv	CSMD2_MDN1	3692	3615	1271	CSMD2	MDN1	protein_coding	protein_coding
Colon Colorectal Cancer.csv	NCOR1_MDN1	3283	3129	1047	NCOR1	MDN1	protein_coding	protein_coding
Colon Colorectal Cancer.csv	CAMSAP2_MDN1	3510	3377	1147	CAMSAP2	MDN1	protein_coding	protein_coding
Colon Colorectal Cancer.csv	USH2A_MDN1	3078	2877	962	USH2A	MDN1	protein_coding	protein_coding
Colon Colorectal Cancer.csv	DYNC2H1_MDN1	3078	2877	962	DYNC2H1	MDN1	protein_coding	protein_coding
Colon Colorectal Cancer.csv	SRCAP_MDN1	3283	3129	1047	SRCAP	MDN1	protein_coding	protein_coding
Colon Colorectal Cancer.csv	LRRK2_MDN1	3283	3129	1047	LRRK2	MDN1	protein_coding	protein_coding
Colon Colorectal Cancer.csv	EIF4G1_MDN1	3283	3129	1047	EIF4G1	MDN1	protein_coding	protein_coding
Colon Colorectal Cancer.csv	GRM1_MDN1	3283	3129	1047	GRM1	MDN1	protein_coding	protein_coding
Colon Colorectal Cancer.csv	TENM3_MDN1	3510	3377	1147	TENM3	MDN1	protein_coding	protein_coding
Colon Colorectal Cancer.csv	UNC80_MDN1	3283	3129	1047	UNC80	MDN1	protein_coding	protein_coding
Colon Colorectal Cancer.csv	TCERG1_MDN1	3283	3129	1047	TCERG1	MDN1	protein_coding	protein_coding
Colon Colorectal Cancer.csv	ANK3_MDN1	3078	2877	962	ANK3	MDN1	protein_coding	protein_coding
Colon Colorectal Cancer.csv	APC2_MDN1	3510	3377	1147	APC2	MDN1	protein_coding	protein_coding
Colon Colorectal Cancer.csv	NIPBL_MDN1	3283	3129	1047	NIPBL	MDN1	protein_coding	protein_coding
Colon Colorectal Cancer.csv	LYST_MDN1	3078	2877	962	LYST	MDN1	protein_coding	protein_coding
Colon Colorectal Cancer.csv	DCHS1_MDN1	3692	3615	1271	DCHS1	MDN1	protein_coding	protein_coding
Colon Colorectal Cancer.csv	BSN_MDN1	3510	3377	1147	BSN	MDN1	protein_coding	protein_coding
Colon Colorectal Cancer.csv	DOCK3_MDN1	3283	3129	1047	DOCK3	MDN1	protein_coding	protein_coding
Colon Colorectal Cancer.csv	ZFHX3_MDN1	3283	3129	1047	ZFHX3	MDN1	protein_coding	protein_coding
Colon Colorectal Cancer.csv	TRIOBP_MDN1	3078	2877	962	TRIOBP	MDN1	protein_coding	protein_coding
Colon Colorectal Cancer.csv	FBN3_MDN1	3692	3615	1271	FBN3	MDN1	protein_coding	protein_coding
Colon Colorectal Cancer.csv	MUC16_MEGF8	3283	3129	1047	MUC16	MEGF8	protein_coding	protein_coding
Colon Colorectal Cancer.csv	TTN_MEGF8	3283	3129	1047	TTN	MEGF8	protein_coding	protein_coding
Colon Colorectal Cancer.csv	KMT2C_MEGF8	3283	3129	1047	KMT2C	MEGF8	protein_coding	protein_coding
Colon Colorectal Cancer.csv	DST_MEGF8	3283	3129	1047	DST	MEGF8	protein_coding	protein_coding
Colon Colorectal Cancer.csv	FAT4_MEGF8	3078	2877	962	FAT4	MEGF8	protein_coding	protein_coding
Colon Colorectal Cancer.csv	FAT3_MEGF8	3078	2877	962	FAT3	MEGF8	protein_coding	protein_coding
Colon Colorectal Cancer.csv	SYNE1_MGAM	3078	2877	962	SYNE1	MGAM	protein_coding	protein_coding
Colon Colorectal Cancer.csv	DST_MGAM	3283	3129	1047	DST	MGAM	protein_coding	protein_coding
Colon Colorectal Cancer.csv	APC_MGAM	3078	2877	962	APC	MGAM	protein_coding	protein_coding
Colon Colorectal Cancer.csv	DLC1_MGAM	3078	2877	962	DLC1	MGAM	protein_coding	protein_coding
Colon Colorectal Cancer.csv	CSMD1_MGAM	3078	2877	962	CSMD1	MGAM	protein_coding	protein_coding
Colon Colorectal Cancer.csv	OBSCN_MGAM	3283	3129	1047	OBSCN	MGAM	protein_coding	protein_coding
Colon Colorectal Cancer.csv	CIT_MKI67	3283	3129	1047	CIT	MKI67	protein_coding	protein_coding
Colon Colorectal Cancer.csv	PLEC_MKI67	3283	3129	1047	PLEC	MKI67	protein_coding	protein_coding
Colon Colorectal Cancer.csv	PCDH15_MKI67	3510	3377	1147	PCDH15	MKI67	protein_coding	protein_coding
Colon Colorectal Cancer.csv	SACS_MKI67	3078	2877	962	SACS	MKI67	protein_coding	protein_coding
Colon Colorectal Cancer.csv	WDFY3_MKI67	3283	3129	1047	WDFY3	MKI67	protein_coding	protein_coding
Colon Colorectal Cancer.csv	KIAA1549_MKI67	3283	3129	1047	KIAA1549	MKI67	protein_coding	protein_coding
Colon Colorectal Cancer.csv	BMPR2_MKI67	3283	3129	1047	BMPR2	MKI67	protein_coding	protein_coding
Colon Colorectal Cancer.csv	FLG_MKI67	3078	2877	962	FLG	MKI67	protein_coding	protein_coding
Colon Colorectal Cancer.csv	DCHS1_MKI67	3510	3377	1147	DCHS1	MKI67	protein_coding	protein_coding
Colon Colorectal Cancer.csv	CDH23_MKI67	3283	3129	1047	CDH23	MKI67	protein_coding	protein_coding
Colon Colorectal Cancer.csv	SPEG_MKI67	3283	3129	1047	SPEG	MKI67	protein_coding	protein_coding
Colon Colorectal Cancer.csv	TP53_MKI67	3078	2877	962	TP53	MKI67	protein_coding	protein_coding
Colon Colorectal Cancer.csv	PCDH10_MLLT4	3283	3129	1047	PCDH10	MLLT4	protein_coding	protein_coding
Colon Colorectal Cancer.csv	MKI67_MLLT4	3283	3129	1047	MKI67	MLLT4	protein_coding	protein_coding
Colon Colorectal Cancer.csv	PKD1_MLLT4	3283	3129	1047	PKD1	MLLT4	protein_coding	protein_coding
Colon Colorectal Cancer.csv	LYST_MLLT4	3078	2877	962	LYST	MLLT4	protein_coding	protein_coding
Colon Colorectal Cancer.csv	RYR3_MLLT4	3078	2877	962	RYR3	MLLT4	protein_coding	protein_coding
Colon Colorectal Cancer.csv	VWF_MLLT4	3078	2877	962	VWF	MLLT4	protein_coding	protein_coding
Colon Colorectal Cancer.csv	TRRAP_MLLT4	3078	2877	962	TRRAP	MLLT4	protein_coding	protein_coding
Colon Colorectal Cancer.csv	PLEC_MLLT4	3078	2877	962	PLEC	MLLT4	protein_coding	protein_coding
Colon Colorectal Cancer.csv	CDH23_MLLT4	3078	2877	962	CDH23	MLLT4	protein_coding	protein_coding
Colon Colorectal Cancer.csv	ACVR2A_MLLT4	3283	3129	1047	ACVR2A	MLLT4	protein_coding	protein_coding
Colon Colorectal Cancer.csv	STAB1_MLLT4	3510	3377	1147	STAB1	MLLT4	protein_coding	protein_coding
Colon Colorectal Cancer.csv	VPS13B_MLLT4	3078	2877	962	VPS13B	MLLT4	protein_coding	protein_coding
Colon Colorectal Cancer.csv	DLC1_MLLT4	3078	2877	962	DLC1	MLLT4	protein_coding	protein_coding
Colon Colorectal Cancer.csv	PCLO_MLLT4	3078	2877	962	PCLO	MLLT4	protein_coding	protein_coding
Colon Colorectal Cancer.csv	DNAH8_MLLT4	3078	2877	962	DNAH8	MLLT4	protein_coding	protein_coding
Colon Colorectal Cancer.csv	NIPBL_MLLT4	3078	2877	962	NIPBL	MLLT4	protein_coding	protein_coding
Colon Colorectal Cancer.csv	CHD9_MLLT4	3078	2877	962	CHD9	MLLT4	protein_coding	protein_coding
Colon Colorectal Cancer.csv	PCDH15_MLLT4	3078	2877	962	PCDH15	MLLT4	protein_coding	protein_coding
Colon Colorectal Cancer.csv	GPR98_MLLT4	3283	3129	1047	GPR98	MLLT4	protein_coding	protein_coding
Colon Colorectal Cancer.csv	SACS_MLLT4	3078	2877	962	SACS	MLLT4	protein_coding	protein_coding
Colon Colorectal Cancer.csv	PIK3CA_MLLT4	3283	3129	1047	PIK3CA	MLLT4	protein_coding	protein_coding
Colon Colorectal Cancer.csv	MUC16_MN1	3078	2877	962	MUC16	MN1	protein_coding	protein_coding
Colon Colorectal Cancer.csv	DNAH7_MSH6	3078	2877	962	DNAH7	MSH6	protein_coding	protein_coding
Colon Colorectal Cancer.csv	MUC4_MSH6	3078	2877	962	MUC4	MSH6	protein_coding	protein_coding
Colon Colorectal Cancer.csv	GRIK3_MUC16	3078	2877	962	GRIK3	MUC16	protein_coding	protein_coding
Colon Colorectal Cancer.csv	MUC16_MUC19	3692	3615	1271	MUC16	MUC19	protein_coding	protein_coding
Colon Colorectal Cancer.csv	NEB_MUC19	3882	3816	1416	NEB	MUC19	protein_coding	protein_coding
Colon Colorectal Cancer.csv	SYNE1_MUC19	3692	3615	1271	SYNE1	MUC19	protein_coding	protein_coding
Colon Colorectal Cancer.csv	KMT2C_MUC2	3283	3129	1047	KMT2C	MUC2	protein_coding	protein_coding
Colon Colorectal Cancer.csv	ZFHX4_MUC2	3078	2877	962	ZFHX4	MUC2	protein_coding	protein_coding
Colon Colorectal Cancer.csv	ZNF536_MUC4	3510	3377	1147	ZNF536	MUC4	protein_coding	protein_coding
Colon Colorectal Cancer.csv	NOTCH3_MUC4	3078	2877	962	NOTCH3	MUC4	protein_coding	protein_coding
Colon Colorectal Cancer.csv	PRRC2C_MUC4	3283	3129	1047	PRRC2C	MUC4	protein_coding	protein_coding
Colon Colorectal Cancer.csv	PLXNB2_MUC4	3078	2877	962	PLXNB2	MUC4	protein_coding	protein_coding
Colon Colorectal Cancer.csv	TPR_MUC4	3078	2877	962	TPR	MUC4	protein_coding	protein_coding
Colon Colorectal Cancer.csv	MED12L_MUC4	3078	2877	962	MED12L	MUC4	protein_coding	protein_coding
Colon Colorectal Cancer.csv	C3_MUC4	3078	2877	962	C3	MUC4	protein_coding	protein_coding
Colon Colorectal Cancer.csv	CDH23_MUC5B	3283	3129	1047	CDH23	MUC5B	protein_coding	protein_coding
Colon Colorectal Cancer.csv	PRKDC_MUC5B	3078	2877	962	PRKDC	MUC5B	protein_coding	protein_coding
Colon Colorectal Cancer.csv	CACNA1E_MUC5B	3283	3129	1047	CACNA1E	MUC5B	protein_coding	protein_coding
Colon Colorectal Cancer.csv	DISP1_MUC5B	3078	2877	962	DISP1	MUC5B	protein_coding	protein_coding
Colon Colorectal Cancer.csv	BRCA2_MUC5B	3078	2877	962	BRCA2	MUC5B	protein_coding	protein_coding
Colon Colorectal Cancer.csv	VWF_MUC5B	3283	3129	1047	VWF	MUC5B	protein_coding	protein_coding
Colon Colorectal Cancer.csv	EIF4G1_MUC5B	3078	2877	962	EIF4G1	MUC5B	protein_coding	protein_coding
Colon Colorectal Cancer.csv	SACS_MUC5B	3283	3129	1047	SACS	MUC5B	protein_coding	protein_coding
Colon Colorectal Cancer.csv	PCDHA13_MUC5B	3078	2877	962	PCDHA13	MUC5B	protein_coding	protein_coding
Colon Colorectal Cancer.csv	DNAH10_MUC5B	3078	2877	962	DNAH10	MUC5B	protein_coding	protein_coding
Colon Colorectal Cancer.csv	PKHD1L1_MUC5B	3510	3377	1147	PKHD1L1	MUC5B	protein_coding	protein_coding
Colon Colorectal Cancer.csv	DMD_MUC5B	3283	3129	1047	DMD	MUC5B	protein_coding	protein_coding
Colon Colorectal Cancer.csv	DCHS2_MUC5B	3283	3129	1047	DCHS2	MUC5B	protein_coding	protein_coding
Colon Colorectal Cancer.csv	FAT3_MXRA5	3283	3129	1047	FAT3	MXRA5	protein_coding	protein_coding
Colon Colorectal Cancer.csv	LRP1B_MXRA5	3283	3129	1047	LRP1B	MXRA5	protein_coding	protein_coding
Colon Colorectal Cancer.csv	TENM3_MXRA5	3510	3377	1147	TENM3	MXRA5	protein_coding	protein_coding
Colon Colorectal Cancer.csv	SYNE2_MXRA5	3283	3129	1047	SYNE2	MXRA5	protein_coding	protein_coding
Colon Colorectal Cancer.csv	SYNE1_MXRA5	3510	3377	1147	SYNE1	MXRA5	protein_coding	protein_coding
Colon Colorectal Cancer.csv	PCLO_MXRA5	3283	3129	1047	PCLO	MXRA5	protein_coding	protein_coding
Colon Colorectal Cancer.csv	DNAH7_MXRA5	3692	3615	1271	DNAH7	MXRA5	protein_coding	protein_coding
Colon Colorectal Cancer.csv	DNAH17_MXRA5	3283	3129	1047	DNAH17	MXRA5	protein_coding	protein_coding
Colon Colorectal Cancer.csv	BRCA2_MXRA5	3510	3377	1147	BRCA2	MXRA5	protein_coding	protein_coding
Colon Colorectal Cancer.csv	RYR3_MXRA5	3510	3377	1147	RYR3	MXRA5	protein_coding	protein_coding
Colon Colorectal Cancer.csv	TTN_MYBBP1A	3078	2877	962	TTN	MYBBP1A	protein_coding	protein_coding
Colon Colorectal Cancer.csv	EP300_MYCBP2	3078	2877	962	EP300	MYCBP2	protein_coding	protein_coding
Colon Colorectal Cancer.csv	TP53_MYCBP2	3078	2877	962	TP53	MYCBP2	protein_coding	protein_coding
Colon Colorectal Cancer.csv	UNC80_MYCBP2	3078	2877	962	UNC80	MYCBP2	protein_coding	protein_coding
Colon Colorectal Cancer.csv	CSMD2_MYCBP2	3078	2877	962	CSMD2	MYCBP2	protein_coding	protein_coding
Colon Colorectal Cancer.csv	DYNC1H1_MYCBP2	3283	3129	1047	DYNC1H1	MYCBP2	protein_coding	protein_coding
Colon Colorectal Cancer.csv	LRP2_MYCBP2	3078	2877	962	LRP2	MYCBP2	protein_coding	protein_coding
Colon Colorectal Cancer.csv	MLLT4_MYCBP2	3078	2877	962	MLLT4	MYCBP2	protein_coding	protein_coding
Colon Colorectal Cancer.csv	LAMA2_MYCBP2	3078	2877	962	LAMA2	MYCBP2	protein_coding	protein_coding
Colon Colorectal Cancer.csv	NCOR2_MYCBP2	3510	3377	1147	NCOR2	MYCBP2	protein_coding	protein_coding
Colon Colorectal Cancer.csv	TIE1_MYCBP2	3078	2877	962	TIE1	MYCBP2	protein_coding	protein_coding
Colon Colorectal Cancer.csv	PKHD1L1_MYCBP2	3283	3129	1047	PKHD1L1	MYCBP2	protein_coding	protein_coding
Colon Colorectal Cancer.csv	NEB_MYCBP2	3283	3129	1047	NEB	MYCBP2	protein_coding	protein_coding
Colon Colorectal Cancer.csv	ATP10A_MYCBP2	3078	2877	962	ATP10A	MYCBP2	protein_coding	protein_coding
Colon Colorectal Cancer.csv	APC2_MYCBP2	3283	3129	1047	APC2	MYCBP2	protein_coding	protein_coding
Colon Colorectal Cancer.csv	DCHS2_MYCBP2	3283	3129	1047	DCHS2	MYCBP2	protein_coding	protein_coding
Colon Colorectal Cancer.csv	NCOR1_MYCBP2	3078	2877	962	NCOR1	MYCBP2	protein_coding	protein_coding
Colon Colorectal Cancer.csv	SPTBN2_MYCBP2	3078	2877	962	SPTBN2	MYCBP2	protein_coding	protein_coding
Colon Colorectal Cancer.csv	GRM1_MYCBP2	3078	2877	962	GRM1	MYCBP2	protein_coding	protein_coding
Colon Colorectal Cancer.csv	ITGB4_MYCBP2	3283	3129	1047	ITGB4	MYCBP2	protein_coding	protein_coding
Colon Colorectal Cancer.csv	EIF4G1_MYCBP2	3078	2877	962	EIF4G1	MYCBP2	protein_coding	protein_coding
Colon Colorectal Cancer.csv	PLEC_MYCBP2	3078	2877	962	PLEC	MYCBP2	protein_coding	protein_coding
Colon Colorectal Cancer.csv	MAP3K4_MYCBP2	3078	2877	962	MAP3K4	MYCBP2	protein_coding	protein_coding
Colon Colorectal Cancer.csv	LAMA1_MYCBP2	3078	2877	962	LAMA1	MYCBP2	protein_coding	protein_coding
Colon Colorectal Cancer.csv	CHD9_MYCBP2	3078	2877	962	CHD9	MYCBP2	protein_coding	protein_coding
Colon Colorectal Cancer.csv	DNAH8_MYCBP2	3283	3129	1047	DNAH8	MYCBP2	protein_coding	protein_coding
Colon Colorectal Cancer.csv	ABCB4_MYCBP2	3078	2877	962	ABCB4	MYCBP2	protein_coding	protein_coding
Colon Colorectal Cancer.csv	APC_MYH13	3078	2877	962	APC	MYH13	protein_coding	protein_coding
Colon Colorectal Cancer.csv	EYS_MYH13	3078	2877	962	EYS	MYH13	protein_coding	protein_coding
Colon Colorectal Cancer.csv	CDH23_MYH13	3078	2877	962	CDH23	MYH13	protein_coding	protein_coding
Colon Colorectal Cancer.csv	OBSCN_MYH13	3283	3129	1047	OBSCN	MYH13	protein_coding	protein_coding
Colon Colorectal Cancer.csv	HERC2_MYH13	3283	3129	1047	HERC2	MYH13	protein_coding	protein_coding
Colon Colorectal Cancer.csv	RYR3_MYH13	3078	2877	962	RYR3	MYH13	protein_coding	protein_coding
Colon Colorectal Cancer.csv	FLG_MYH13	3283	3129	1047	FLG	MYH13	protein_coding	protein_coding
Colon Colorectal Cancer.csv	SYNE1_MYH13	1227	1150	465	SYNE1	MYH13	protein_coding	protein_coding
Colon Colorectal Cancer.csv	CACNA1E_PDE4DIP	3510	3377	1147	CACNA1E	PDE4DIP	protein_coding	protein_coding
Colon Colorectal Cancer.csv	TENC1_PDE4DIP	3692	3615	1271	TENC1	PDE4DIP	protein_coding	protein_coding
Colon Colorectal Cancer.csv	MACF1_PDE4DIP	3692	3615	1271	MACF1	PDE4DIP	protein_coding	protein_coding
Colon Colorectal Cancer.csv	PKD1_PDE4DIP	3692	3615	1271	PKD1	PDE4DIP	protein_coding	protein_coding
Colon Colorectal Cancer.csv	VPS13B_PDE4DIP	3510	3377	1147	VPS13B	PDE4DIP	protein_coding	protein_coding
Colon Colorectal Cancer.csv	PCDH15_PDE4DIP	3692	3615	1271	PCDH15	PDE4DIP	protein_coding	protein_coding
Colon Colorectal Cancer.csv	CDH23_PDE4DIP	3692	3615	1271	CDH23	PDE4DIP	protein_coding	protein_coding
Colon Colorectal Cancer.csv	DNAH17_PDS5B	3078	2877	962	DNAH17	PDS5B	protein_coding	protein_coding
Colon Colorectal Cancer.csv	KMT2C_PDS5B	3078	2877	962	KMT2C	PDS5B	protein_coding	protein_coding
Colon Colorectal Cancer.csv	BRCA2_PDS5B	3078	2877	962	BRCA2	PDS5B	protein_coding	protein_coding
Colon Colorectal Cancer.csv	LRP1_PDS5B	3078	2877	962	LRP1	PDS5B	protein_coding	protein_coding
Colon Colorectal Cancer.csv	NEB_PDZD2	3510	3377	1147	NEB	PDZD2	protein_coding	protein_coding
Colon Colorectal Cancer.csv	OBSCN_PDZD2	3510	3377	1147	OBSCN	PDZD2	protein_coding	protein_coding
Colon Colorectal Cancer.csv	KMT2C_PDZD2	3510	3377	1147	KMT2C	PDZD2	protein_coding	protein_coding
Colon Colorectal Cancer.csv	GPR98_PEG3	3283	3129	1047	GPR98	PEG3	protein_coding	protein_coding
Colon Colorectal Cancer.csv	FAT3_PEG3	3078	2877	962	FAT3	PEG3	protein_coding	protein_coding
Colon Colorectal Cancer.csv	NEB_PEG3	3510	3377	1147	NEB	PEG3	protein_coding	protein_coding
Colon Colorectal Cancer.csv	CSMD1_PEG3	3283	3129	1047	CSMD1	PEG3	protein_coding	protein_coding
Colon Colorectal Cancer.csv	VWF_PEG3	3078	2877	962	VWF	PEG3	protein_coding	protein_coding
Colon Colorectal Cancer.csv	RNF213_PEG3	3078	2877	962	RNF213	PEG3	protein_coding	protein_coding
Colon Colorectal Cancer.csv	ZFHX4_PEG3	3283	3129	1047	ZFHX4	PEG3	protein_coding	protein_coding
Colon Colorectal Cancer.csv	SYNE2_PEG3	3283	3129	1047	SYNE2	PEG3	protein_coding	protein_coding
Colon Colorectal Cancer.csv	DNAH17_PEG3	3078	2877	962	DNAH17	PEG3	protein_coding	protein_coding
Colon Colorectal Cancer.csv	MUC16_PEX1	3078	2877	962	MUC16	PEX1	protein_coding	protein_coding
Colon Colorectal Cancer.csv	CSMD1_PHF14	3078	2877	962	CSMD1	PHF14	protein_coding	protein_coding
Colon Colorectal Cancer.csv	GPR98_PHF14	3283	3129	1047	GPR98	PHF14	protein_coding	protein_coding
Colon Colorectal Cancer.csv	OBSCN_PHF3	3078	2877	962	OBSCN	PHF3	protein_coding	protein_coding
Colon Colorectal Cancer.csv	SYNE2_PHF3	3078	2877	962	SYNE2	PHF3	protein_coding	protein_coding
Colon Colorectal Cancer.csv	FAT2_PHF3	3078	2877	962	FAT2	PHF3	protein_coding	protein_coding
Colon Colorectal Cancer.csv	MUC16_PHF3	3078	2877	962	MUC16	PHF3	protein_coding	protein_coding
Colon Colorectal Cancer.csv	KMT2C_PHF3	3078	2877	962	KMT2C	PHF3	protein_coding	protein_coding
Colon Colorectal Cancer.csv	FSIP2_PI4KA	3078	2877	962	FSIP2	PI4KA	protein_coding	protein_coding
Colon Colorectal Cancer.csv	MUC16_PI4KA	3078	2877	962	MUC16	PI4KA	protein_coding	protein_coding
Colon Colorectal Cancer.csv	SYNE1_PI4KA	3078	2877	962	SYNE1	PI4KA	protein_coding	protein_coding
Colon Colorectal Cancer.csv	KMT2C_PI4KA	3078	2877	962	KMT2C	PI4KA	protein_coding	protein_coding
Colon Colorectal Cancer.csv	HMCN1_PI4KA	3078	2877	962	HMCN1	PI4KA	protein_coding	protein_coding
Colon Colorectal Cancer.csv	RYR1_PI4KA	3078	2877	962	RYR1	PI4KA	protein_coding	protein_coding
Colon Colorectal Cancer.csv	TTN_PIEZO2	3283	3129	1047	TTN	PIEZO2	protein_coding	protein_coding
Colon Colorectal Cancer.csv	GPR98_PIEZO2	3283	3129	1047	GPR98	PIEZO2	protein_coding	protein_coding
Colon Colorectal Cancer.csv	DST_PIEZO2	3283	3129	1047	DST	PIEZO2	protein_coding	protein_coding
Colon Colorectal Cancer.csv	SYNE1_PIEZO2	3283	3129	1047	SYNE1	PIEZO2	protein_coding	protein_coding
Colon Colorectal Cancer.csv	OBSCN_PIEZO2	3283	3129	1047	OBSCN	PIEZO2	protein_coding	protein_coding
Colon Colorectal Cancer.csv	FSIP2_PIEZO2	3078	2877	962	FSIP2	PIEZO2	protein_coding	protein_coding
Colon Colorectal Cancer.csv	MUC16_PIEZO2	3283	3129	1047	MUC16	PIEZO2	protein_coding	protein_coding
Colon Colorectal Cancer.csv	KIAA1549_PIK3CA	3510	3377	1147	KIAA1549	PIK3CA	protein_coding	protein_coding
Colon Colorectal Cancer.csv	RIF1_PIK3CA	3510	3377	1147	RIF1	PIK3CA	protein_coding	protein_coding
Colon Colorectal Cancer.csv	WDFY4_PIK3CA	3283	3129	1047	WDFY4	PIK3CA	protein_coding	protein_coding
Colon Colorectal Cancer.csv	APOB_PIK3CA	3510	3377	1147	APOB	PIK3CA	protein_coding	protein_coding
Colon Colorectal Cancer.csv	SDK1_PIK3CA	3692	3615	1271	SDK1	PIK3CA	protein_coding	protein_coding
Colon Colorectal Cancer.csv	TP53_PIK3CA	3078	2877	962	TP53	PIK3CA	protein_coding	protein_coding
Colon Colorectal Cancer.csv	HMCN1_PIK3CA	3510	3377	1147	HMCN1	PIK3CA	protein_coding	protein_coding
Colon Colorectal Cancer.csv	DYNC2H1_PIK3CA	3078	2877	962	DYNC2H1	PIK3CA	protein_coding	protein_coding
Colon Colorectal Cancer.csv	USH2A_PIK3CA	3283	3129	1047	USH2A	PIK3CA	protein_coding	protein_coding
Colon Colorectal Cancer.csv	MKI67_PIK3CA	3510	3377	1147	MKI67	PIK3CA	protein_coding	protein_coding
Colon Colorectal Cancer.csv	NIPBL_PIK3CA	3283	3129	1047	NIPBL	PIK3CA	protein_coding	protein_coding
Colon Colorectal Cancer.csv	ROBO1_PIK3CA	3283	3129	1047	ROBO1	PIK3CA	protein_coding	protein_coding
Colon Colorectal Cancer.csv	ABCA13_PIK3CA	3510	3377	1147	ABCA13	PIK3CA	protein_coding	protein_coding
Colon Colorectal Cancer.csv	LAMA1_PIK3CA	3283	3129	1047	LAMA1	PIK3CA	protein_coding	protein_coding
Colon Colorectal Cancer.csv	MAP3K4_PIK3CA	3283	3129	1047	MAP3K4	PIK3CA	protein_coding	protein_coding
Colon Colorectal Cancer.csv	SMARCA4_PIK3CA	3283	3129	1047	SMARCA4	PIK3CA	protein_coding	protein_coding
Colon Colorectal Cancer.csv	CDH23_PIK3CA	3692	3615	1271	CDH23	PIK3CA	protein_coding	protein_coding
Colon Colorectal Cancer.csv	TRRAP_PIK3CA	3510	3377	1147	TRRAP	PIK3CA	protein_coding	protein_coding
Colon Colorectal Cancer.csv	FAT4_PIK3CA	3510	3377	1147	FAT4	PIK3CA	protein_coding	protein_coding
Colon Colorectal Cancer.csv	CACNA1A_PIK3CA	3283	3129	1047	CACNA1A	PIK3CA	protein_coding	protein_coding
Colon Colorectal Cancer.csv	PKD1_PIK3CA	3283	3129	1047	PKD1	PIK3CA	protein_coding	protein_coding
Colon Colorectal Cancer.csv	MACF1_PIK3CA	3510	3377	1147	MACF1	PIK3CA	protein_coding	protein_coding
Colon Colorectal Cancer.csv	DNAH8_PIK3CA	3283	3129	1047	DNAH8	PIK3CA	protein_coding	protein_coding
Colon Colorectal Cancer.csv	NCOR1_PIK3CA	3510	3377	1147	NCOR1	PIK3CA	protein_coding	protein_coding
Colon Colorectal Cancer.csv	FBXW7_PKD1	3078	2877	962	FBXW7	PKD1	protein_coding	protein_coding
Colon Colorectal Cancer.csv	SRCAP_PKD1	3078	2877	962	SRCAP	PKD1	protein_coding	protein_coding
Colon Colorectal Cancer.csv	DNAH14_PKD1	3078	2877	962	DNAH14	PKD1	protein_coding	protein_coding
Colon Colorectal Cancer.csv	SACS_PKD1	3078	2877	962	SACS	PKD1	protein_coding	protein_coding
Colon Colorectal Cancer.csv	SPEG_PKD1	3078	2877	962	SPEG	PKD1	protein_coding	protein_coding
Colon Colorectal Cancer.csv	BMPR2_PKD1	3078	2877	962	BMPR2	PKD1	protein_coding	protein_coding
Colon Colorectal Cancer.csv	MUC2_PKD1	3283	3129	1047	MUC2	PKD1	protein_coding	protein_coding
Colon Colorectal Cancer.csv	DCHS1_PKD1	3283	3129	1047	DCHS1	PKD1	protein_coding	protein_coding
Colon Colorectal Cancer.csv	MUC17_PKD1	3283	3129	1047	MUC17	PKD1	protein_coding	protein_coding
Colon Colorectal Cancer.csv	IRS1_PKD1L1	3078	2877	962	IRS1	PKD1L1	protein_coding	protein_coding
Colon Colorectal Cancer.csv	ABCA13_PKD1L1	3078	2877	962	ABCA13	PKD1L1	protein_coding	protein_coding
Colon Colorectal Cancer.csv	TP53_PKD1L1	3078	2877	962	TP53	PKD1L1	protein_coding	protein_coding
Colon Colorectal Cancer.csv	DNAH7_PKD1L1	3283	3129	1047	DNAH7	PKD1L1	protein_coding	protein_coding
Colon Colorectal Cancer.csv	SYNE2_PKD1L1	3078	2877	962	SYNE2	PKD1L1	protein_coding	protein_coding
Colon Colorectal Cancer.csv	PCDH15_PKD1L1	3283	3129	1047	PCDH15	PKD1L1	protein_coding	protein_coding
Colon Colorectal Cancer.csv	NEB_PKHD1	3283	3129	1047	NEB	PKHD1	protein_coding	protein_coding
Colon Colorectal Cancer.csv	GPR98_PKHD1	3283	3129	1047	GPR98	PKHD1	protein_coding	protein_coding
Colon Colorectal Cancer.csv	C3_PKHD1L1	3078	2877	962	C3	PKHD1L1	protein_coding	protein_coding
Colon Colorectal Cancer.csv	NAV3_PKHD1L1	3078	2877	962	NAV3	PKHD1L1	protein_coding	protein_coding
Colon Colorectal Cancer.csv	DMD_PKHD1L1	3510	3377	1147	DMD	PKHD1L1	protein_coding	protein_coding
Colon Colorectal Cancer.csv	SPEG_PKHD1L1	3510	3377	1147	SPEG	PKHD1L1	protein_coding	protein_coding
Colon Colorectal Cancer.csv	PLEC_PKHD1L1	3283	3129	1047	PLEC	PKHD1L1	protein_coding	protein_coding
Colon Colorectal Cancer.csv	ACVR2A_PKHD1L1	3510	3377	1147	ACVR2A	PKHD1L1	protein_coding	protein_coding
Colon Colorectal Cancer.csv	USP34_PKHD1L1	3078	2877	962	USP34	PKHD1L1	protein_coding	protein_coding
Colon Colorectal Cancer.csv	USH2A_PKHD1L1	3078	2877	962	USH2A	PKHD1L1	protein_coding	protein_coding
Colon Colorectal Cancer.csv	KMT2D_PLA2R1	3283	3129	1047	KMT2D	PLA2R1	protein_coding	protein_coding
Colon Colorectal Cancer.csv	HMCN1_PLA2R1	3510	3377	1147	HMCN1	PLA2R1	protein_coding	protein_coding
Colon Colorectal Cancer.csv	RYR1_PLA2R1	3510	3377	1147	RYR1	PLA2R1	protein_coding	protein_coding
Colon Colorectal Cancer.csv	DST_PLA2R1	3510	3377	1147	DST	PLA2R1	protein_coding	protein_coding
Colon Colorectal Cancer.csv	RYR3_PLA2R1	3283	3129	1047	RYR3	PLA2R1	protein_coding	protein_coding
Colon Colorectal Cancer.csv	SYNE2_PLA2R1	3283	3129	1047	SYNE2	PLA2R1	protein_coding	protein_coding
Colon Colorectal Cancer.csv	ABCA13_PLEKHA6	3283	3129	1047	ABCA13	PLEKHA6	protein_coding	protein_coding
Colon Colorectal Cancer.csv	LAMA1_PLEKHA6	3283	3129	1047	LAMA1	PLEKHA6	protein_coding	protein_coding
Colon Colorectal Cancer.csv	VWF_PLEKHA6	3078	2877	962	VWF	PLEKHA6	protein_coding	protein_coding
Colon Colorectal Cancer.csv	PCDH10_PLEKHA6	3283	3129	1047	PCDH10	PLEKHA6	protein_coding	protein_coding
Colon Colorectal Cancer.csv	UNC13C_PLEKHA6	3283	3129	1047	UNC13C	PLEKHA6	protein_coding	protein_coding
Colon Colorectal Cancer.csv	CSMD1_PLEKHA6	3078	2877	962	CSMD1	PLEKHA6	protein_coding	protein_coding
Colon Colorectal Cancer.csv	PCLO_PLEKHA6	3078	2877	962	PCLO	PLEKHA6	protein_coding	protein_coding
Colon Colorectal Cancer.csv	LRP2_PLEKHA6	3283	3129	1047	LRP2	PLEKHA6	protein_coding	protein_coding
Colon Colorectal Cancer.csv	RNF213_PLEKHA6	3510	3377	1147	RNF213	PLEKHA6	protein_coding	protein_coding
Colon Colorectal Cancer.csv	ZFHX4_PLEKHA6	3283	3129	1047	ZFHX4	PLEKHA6	protein_coding	protein_coding
Colon Colorectal Cancer.csv	APOB_PLEKHA6	3283	3129	1047	APOB	PLEKHA6	protein_coding	protein_coding
Colon Colorectal Cancer.csv	MKI67_PLEKHA6	3078	2877	962	MKI67	PLEKHA6	protein_coding	protein_coding
Colon Colorectal Cancer.csv	DNAH17_PLEKHA6	3078	2877	962	DNAH17	PLEKHA6	protein_coding	protein_coding
Colon Colorectal Cancer.csv	HERC2_PLEKHA6	3283	3129	1047	HERC2	PLEKHA6	protein_coding	protein_coding
Colon Colorectal Cancer.csv	RYR2_PLEKHA6	3283	3129	1047	RYR2	PLEKHA6	protein_coding	protein_coding
Colon Colorectal Cancer.csv	HMCN1_PLXNA2	3078	2877	962	HMCN1	PLXNA2	protein_coding	protein_coding
Colon Colorectal Cancer.csv	MED12L_PLXNA2	3078	2877	962	MED12L	PLXNA2	protein_coding	protein_coding
Colon Colorectal Cancer.csv	ABCA13_PLXNA2	3078	2877	962	ABCA13	PLXNA2	protein_coding	protein_coding
Colon Colorectal Cancer.csv	HERC2_PLXNA2	3078	2877	962	HERC2	PLXNA2	protein_coding	protein_coding
Colon Colorectal Cancer.csv	DNAH7_PLXNA4	3510	3377	1147	DNAH7	PLXNA4	protein_coding	protein_coding
Colon Colorectal Cancer.csv	FAT3_PLXNA4	3283	3129	1047	FAT3	PLXNA4	protein_coding	protein_coding
Colon Colorectal Cancer.csv	RYR1_PLXNA4	3283	3129	1047	RYR1	PLXNA4	protein_coding	protein_coding
Colon Colorectal Cancer.csv	DNAH10_PLXNA4	3283	3129	1047	DNAH10	PLXNA4	protein_coding	protein_coding
Colon Colorectal Cancer.csv	SYNE2_PLXNA4	3283	3129	1047	SYNE2	PLXNA4	protein_coding	protein_coding
Colon Colorectal Cancer.csv	PCDH10_PLXNA4	3283	3129	1047	PCDH10	PLXNA4	protein_coding	protein_coding
Colon Colorectal Cancer.csv	MKI67_PLXNA4	3283	3129	1047	MKI67	PLXNA4	protein_coding	protein_coding
Colon Colorectal Cancer.csv	OBSCN_PLXNA4	3510	3377	1147	OBSCN	PLXNA4	protein_coding	protein_coding
Colon Colorectal Cancer.csv	SYNE1_PLXNA4	3283	3129	1047	SYNE1	PLXNA4	protein_coding	protein_coding
Colon Colorectal Cancer.csv	ZFHX4_PLXNA4	3510	3377	1147	ZFHX4	PLXNA4	protein_coding	protein_coding
Colon Colorectal Cancer.csv	OBSCN_PLXNB1	3283	3129	1047	OBSCN	PLXNB1	protein_coding	protein_coding
Colon Colorectal Cancer.csv	MUC16_PLXNB1	3283	3129	1047	MUC16	PLXNB1	protein_coding	protein_coding
Colon Colorectal Cancer.csv	TTN_PLXNB1	3283	3129	1047	TTN	PLXNB1	protein_coding	protein_coding
Colon Colorectal Cancer.csv	KMT2C_POLD1	3510	3377	1147	KMT2C	POLD1	protein_coding	protein_coding
Colon Colorectal Cancer.csv	HMCN1_POLD1	3283	3129	1047	HMCN1	POLD1	protein_coding	protein_coding
Colon Colorectal Cancer.csv	RYR2_POLD1	3283	3129	1047	RYR2	POLD1	protein_coding	protein_coding
Colon Colorectal Cancer.csv	CDH23_POLD1	3283	3129	1047	CDH23	POLD1	protein_coding	protein_coding
Colon Colorectal Cancer.csv	PKD1_POLD1	3692	3615	1271	PKD1	POLD1	protein_coding	protein_coding
Colon Colorectal Cancer.csv	ZFHX4_POLD1	3283	3129	1047	ZFHX4	POLD1	protein_coding	protein_coding
Colon Colorectal Cancer.csv	SDK1_POLD1	3510	3377	1147	SDK1	POLD1	protein_coding	protein_coding
Colon Colorectal Cancer.csv	GPR98_POLD1	3510	3377	1147	GPR98	POLD1	protein_coding	protein_coding
Colon Colorectal Cancer.csv	FAT3_POLD1	3283	3129	1047	FAT3	POLD1	protein_coding	protein_coding
Colon Colorectal Cancer.csv	DNAH5_POLD1	3283	3129	1047	DNAH5	POLD1	protein_coding	protein_coding
Colon Colorectal Cancer.csv	MUC4_POLD1	3510	3377	1147	MUC4	POLD1	protein_coding	protein_coding
Colon Colorectal Cancer.csv	DNAH7_POLD1	3510	3377	1147	DNAH7	POLD1	protein_coding	protein_coding
Colon Colorectal Cancer.csv	PCDH15_POLD1	3283	3129	1047	PCDH15	POLD1	protein_coding	protein_coding
Colon Colorectal Cancer.csv	ACVR2A_POLQ	3283	3129	1047	ACVR2A	POLQ	protein_coding	protein_coding
Colon Colorectal Cancer.csv	WDFY4_POLQ	3078	2877	962	WDFY4	POLQ	protein_coding	protein_coding
Colon Colorectal Cancer.csv	DYNC2H1_POLQ	3078	2877	962	DYNC2H1	POLQ	protein_coding	protein_coding
Colon Colorectal Cancer.csv	CACNA1A_POLQ	3078	2877	962	CACNA1A	POLQ	protein_coding	protein_coding
Colon Colorectal Cancer.csv	SVIL_POLQ	3283	3129	1047	SVIL	POLQ	protein_coding	protein_coding
Colon Colorectal Cancer.csv	DNAH1_POLQ	3078	2877	962	DNAH1	POLQ	protein_coding	protein_coding
Colon Colorectal Cancer.csv	MUC4_POLQ	3078	2877	962	MUC4	POLQ	protein_coding	protein_coding
Colon Colorectal Cancer.csv	KRAS_POLQ	3510	3377	1147	KRAS	POLQ	protein_coding	protein_coding
Colon Colorectal Cancer.csv	EP400_POLQ	3283	3129	1047	EP400	POLQ	protein_coding	protein_coding
Colon Colorectal Cancer.csv	VWF_POLQ	3078	2877	962	VWF	POLQ	protein_coding	protein_coding
Colon Colorectal Cancer.csv	PCDH15_POLQ	3078	2877	962	PCDH15	POLQ	protein_coding	protein_coding
Colon Colorectal Cancer.csv	KMT2C_PPFIA2	3078	2877	962	KMT2C	PPFIA2	protein_coding	protein_coding
Colon Colorectal Cancer.csv	MUC16_PREX2	3283	3129	1047	MUC16	PREX2	protein_coding	protein_coding
Colon Colorectal Cancer.csv	APC_PREX2	3078	2877	962	APC	PREX2	protein_coding	protein_coding
Colon Colorectal Cancer.csv	HERC2_PREX2	3283	3129	1047	HERC2	PREX2	protein_coding	protein_coding
Colon Colorectal Cancer.csv	NEB_PREX2	3510	3377	1147	NEB	PREX2	protein_coding	protein_coding
Colon Colorectal Cancer.csv	HMCN1_PRKDC	3078	2877	962	HMCN1	PRKDC	protein_coding	protein_coding
Colon Colorectal Cancer.csv	GPR98_PRKDC	3510	3377	1147	GPR98	PRKDC	protein_coding	protein_coding
Colon Colorectal Cancer.csv	LRP1B_PRKDC	3510	3377	1147	LRP1B	PRKDC	protein_coding	protein_coding
Colon Colorectal Cancer.csv	CSMD1_PRKDC	3078	2877	962	CSMD1	PRKDC	protein_coding	protein_coding
Colon Colorectal Cancer.csv	HERC2_PRKDC	3283	3129	1047	HERC2	PRKDC	protein_coding	protein_coding
Colon Colorectal Cancer.csv	APC_PRKDC	3283	3129	1047	APC	PRKDC	protein_coding	protein_coding
Colon Colorectal Cancer.csv	ZFHX4_PRKDC	3283	3129	1047	ZFHX4	PRKDC	protein_coding	protein_coding
Colon Colorectal Cancer.csv	SYNE2_PRR14L	3283	3129	1047	SYNE2	PRR14L	protein_coding	protein_coding
Colon Colorectal Cancer.csv	MKI67_PRR14L	3283	3129	1047	MKI67	PRR14L	protein_coding	protein_coding
Colon Colorectal Cancer.csv	RYR1_PRR14L	3283	3129	1047	RYR1	PRR14L	protein_coding	protein_coding
Colon Colorectal Cancer.csv	HMCN1_PRR14L	3283	3129	1047	HMCN1	PRR14L	protein_coding	protein_coding
Colon Colorectal Cancer.csv	GPR98_PRR14L	3283	3129	1047	GPR98	PRR14L	protein_coding	protein_coding
Colon Colorectal Cancer.csv	TRRAP_PRR14L	3283	3129	1047	TRRAP	PRR14L	protein_coding	protein_coding
Colon Colorectal Cancer.csv	ABCB4_PRR14L	3078	2877	962	ABCB4	PRR14L	protein_coding	protein_coding
Colon Colorectal Cancer.csv	DNAH7_PRR14L	3283	3129	1047	DNAH7	PRR14L	protein_coding	protein_coding
Colon Colorectal Cancer.csv	PCLO_PRR14L	3078	2877	962	PCLO	PRR14L	protein_coding	protein_coding
Colon Colorectal Cancer.csv	KMT2D_PRR14L	3283	3129	1047	KMT2D	PRR14L	protein_coding	protein_coding
Colon Colorectal Cancer.csv	MUC16_PRTG	3692	3615	1271	MUC16	PRTG	protein_coding	protein_coding
Colon Colorectal Cancer.csv	LRP1_PRUNE2	3078	2877	962	LRP1	PRUNE2	protein_coding	protein_coding
Colon Colorectal Cancer.csv	TTN_PTPRB	3283	3129	1047	TTN	PTPRB	protein_coding	protein_coding
Colon Colorectal Cancer.csv	APC_PTPRN2	3283	3129	1047	APC	PTPRN2	protein_coding	protein_coding
Colon Colorectal Cancer.csv	TTN_PTPRN2	3283	3129	1047	TTN	PTPRN2	protein_coding	protein_coding
Colon Colorectal Cancer.csv	GPR98_PTPRS	3283	3129	1047	GPR98	PTPRS	protein_coding	protein_coding
Colon Colorectal Cancer.csv	DST_PTPRS	3078	2877	962	DST	PTPRS	protein_coding	protein_coding
Colon Colorectal Cancer.csv	CSMD1_PTPRS	3078	2877	962	CSMD1	PTPRS	protein_coding	protein_coding
Colon Colorectal Cancer.csv	HMCN1_PTPRS	3078	2877	962	HMCN1	PTPRS	protein_coding	protein_coding
Colon Colorectal Cancer.csv	ACVR2A_PTPRS	3283	3129	1047	ACVR2A	PTPRS	protein_coding	protein_coding
Colon Colorectal Cancer.csv	NOTCH3_PTPRS	3078	2877	962	NOTCH3	PTPRS	protein_coding	protein_coding
Colon Colorectal Cancer.csv	EYS_PTPRS	3078	2877	962	EYS	PTPRS	protein_coding	protein_coding
Colon Colorectal Cancer.csv	LAMA5_PTPRS	3078	2877	962	LAMA5	PTPRS	protein_coding	protein_coding
Colon Colorectal Cancer.csv	MUC16_PTPRU	3078	2877	962	MUC16	PTPRU	protein_coding	protein_coding
Colon Colorectal Cancer.csv	TTN_PTPRZ1	3283	3129	1047	TTN	PTPRZ1	protein_coding	protein_coding
Colon Colorectal Cancer.csv	HERC2_PXDNL	3078	2877	962	HERC2	PXDNL	protein_coding	protein_coding
Colon Colorectal Cancer.csv	DNAH7_PXDNL	3078	2877	962	DNAH7	PXDNL	protein_coding	protein_coding
Colon Colorectal Cancer.csv	CDH23_PXDNL	3078	2877	962	CDH23	PXDNL	protein_coding	protein_coding
Colon Colorectal Cancer.csv	GPR98_PXDNL	3283	3129	1047	GPR98	PXDNL	protein_coding	protein_coding
Colon Colorectal Cancer.csv	SYNE2_RASGRF1	3078	2877	962	SYNE2	RASGRF1	protein_coding	protein_coding
Colon Colorectal Cancer.csv	PCLO_RELN	3078	2877	962	PCLO	RELN	protein_coding	protein_coding
Colon Colorectal Cancer.csv	KMT2D_RELN	3078	2877	962	KMT2D	RELN	protein_coding	protein_coding
Colon Colorectal Cancer.csv	LRP1B_RELN	3078	2877	962	LRP1B	RELN	protein_coding	protein_coding
Colon Colorectal Cancer.csv	EYS_RELN	3078	2877	962	EYS	RELN	protein_coding	protein_coding
Colon Colorectal Cancer.csv	OBSCN_RELN	3078	2877	962	OBSCN	RELN	protein_coding	protein_coding
Colon Colorectal Cancer.csv	CREBBP_RELN	3078	2877	962	CREBBP	RELN	protein_coding	protein_coding
Colon Colorectal Cancer.csv	LAMA1_RELN	3078	2877	962	LAMA1	RELN	protein_coding	protein_coding
Colon Colorectal Cancer.csv	TTN_RGS22	3078	2877	962	TTN	RGS22	protein_coding	protein_coding
Colon Colorectal Cancer.csv	RYR1_RGS22	3078	2877	962	RYR1	RGS22	protein_coding	protein_coding
Colon Colorectal Cancer.csv	EIF4G1_RIF1	3283	3129	1047	EIF4G1	RIF1	protein_coding	protein_coding
Colon Colorectal Cancer.csv	ZFHX3_RIF1	3078	2877	962	ZFHX3	RIF1	protein_coding	protein_coding
Colon Colorectal Cancer.csv	CDH23_RIF1	3510	3377	1147	CDH23	RIF1	protein_coding	protein_coding
Colon Colorectal Cancer.csv	CIT_RIF1	3078	2877	962	CIT	RIF1	protein_coding	protein_coding
Colon Colorectal Cancer.csv	MUC16_RIMBP2	3283	3129	1047	MUC16	RIMBP2	protein_coding	protein_coding
Colon Colorectal Cancer.csv	KMT2C_RIMBP2	3510	3377	1147	KMT2C	RIMBP2	protein_coding	protein_coding
Colon Colorectal Cancer.csv	PCLO_RIMS1	3078	2877	962	PCLO	RIMS1	protein_coding	protein_coding
Colon Colorectal Cancer.csv	LRP1B_RIMS1	1227	1150	465	LRP1B	RIMS1	protein_coding	protein_coding
Colon Colorectal Cancer.csv	LRP1B_TCERG1	3283	3129	1047	LRP1B	TCERG1	protein_coding	protein_coding
Colon Colorectal Cancer.csv	UNC80_TCERG1	3078	2877	962	UNC80	TCERG1	protein_coding	protein_coding
Colon Colorectal Cancer.csv	SDK1_TCERG1	3078	2877	962	SDK1	TCERG1	protein_coding	protein_coding
Colon Colorectal Cancer.csv	RNF213_TCERG1	3078	2877	962	RNF213	TCERG1	protein_coding	protein_coding
Colon Colorectal Cancer.csv	UNC13C_TCERG1	3078	2877	962	UNC13C	TCERG1	protein_coding	protein_coding
Colon Colorectal Cancer.csv	KMT2D_TCERG1	3078	2877	962	KMT2D	TCERG1	protein_coding	protein_coding
Colon Colorectal Cancer.csv	WDFY4_TCERG1	3078	2877	962	WDFY4	TCERG1	protein_coding	protein_coding
Colon Colorectal Cancer.csv	MACF1_TCERG1	3078	2877	962	MACF1	TCERG1	protein_coding	protein_coding
Colon Colorectal Cancer.csv	POLQ_TCERG1	3078	2877	962	POLQ	TCERG1	protein_coding	protein_coding
Colon Colorectal Cancer.csv	ASCC3_TCERG1	3283	3129	1047	ASCC3	TCERG1	protein_coding	protein_coding
Colon Colorectal Cancer.csv	MKI67_TCERG1	3078	2877	962	MKI67	TCERG1	protein_coding	protein_coding
Colon Colorectal Cancer.csv	FAT4_TCERG1	3078	2877	962	FAT4	TCERG1	protein_coding	protein_coding
Colon Colorectal Cancer.csv	PKHD1L1_TCERG1	3283	3129	1047	PKHD1L1	TCERG1	protein_coding	protein_coding
Colon Colorectal Cancer.csv	SDK1_TCF20	3510	3377	1147	SDK1	TCF20	protein_coding	protein_coding
Colon Colorectal Cancer.csv	ABCA13_TCF20	3283	3129	1047	ABCA13	TCF20	protein_coding	protein_coding
Colon Colorectal Cancer.csv	FREM2_TCF20	3078	2877	962	FREM2	TCF20	protein_coding	protein_coding
Colon Colorectal Cancer.csv	WDFY4_TCF20	3078	2877	962	WDFY4	TCF20	protein_coding	protein_coding
Colon Colorectal Cancer.csv	VPS13C_TCF20	3078	2877	962	VPS13C	TCF20	protein_coding	protein_coding
Colon Colorectal Cancer.csv	NAV3_TCF20	3078	2877	962	NAV3	TCF20	protein_coding	protein_coding
Colon Colorectal Cancer.csv	RYR2_TCF20	3283	3129	1047	RYR2	TCF20	protein_coding	protein_coding
Colon Colorectal Cancer.csv	HERC2_TCF20	3283	3129	1047	HERC2	TCF20	protein_coding	protein_coding
Colon Colorectal Cancer.csv	MUC16_TCHH	3078	2877	962	MUC16	TCHH	protein_coding	protein_coding
Colon Colorectal Cancer.csv	SYNE2_TCHH	3510	3377	1147	SYNE2	TCHH	protein_coding	protein_coding
Colon Colorectal Cancer.csv	TTN_TDRD6	3078	2877	962	TTN	TDRD6	protein_coding	protein_coding
Colon Colorectal Cancer.csv	ACVR2A_TENC1	3692	3615	1271	ACVR2A	TENC1	protein_coding	protein_coding
Colon Colorectal Cancer.csv	LRP1_TENM1	3078	2877	962	LRP1	TENM1	protein_coding	protein_coding
Colon Colorectal Cancer.csv	OBSCN_TENM1	3283	3129	1047	OBSCN	TENM1	protein_coding	protein_coding
Colon Colorectal Cancer.csv	LRP1B_TENM1	3078	2877	962	LRP1B	TENM1	protein_coding	protein_coding
Colon Colorectal Cancer.csv	FAT2_TENM1	3283	3129	1047	FAT2	TENM1	protein_coding	protein_coding
Colon Colorectal Cancer.csv	HERC2_TENM2	3510	3377	1147	HERC2	TENM2	protein_coding	protein_coding
Colon Colorectal Cancer.csv	ABCA13_TENM2	3510	3377	1147	ABCA13	TENM2	protein_coding	protein_coding
Colon Colorectal Cancer.csv	DST_TENM2	3510	3377	1147	DST	TENM2	protein_coding	protein_coding
Colon Colorectal Cancer.csv	NEB_TENM2	3692	3615	1271	NEB	TENM2	protein_coding	protein_coding
Colon Colorectal Cancer.csv	DNAH7_TENM2	3692	3615	1271	DNAH7	TENM2	protein_coding	protein_coding
Colon Colorectal Cancer.csv	HMCN1_TENM2	3510	3377	1147	HMCN1	TENM2	protein_coding	protein_coding
Colon Colorectal Cancer.csv	LRP1_TENM2	3692	3615	1271	LRP1	TENM2	protein_coding	protein_coding
Colon Colorectal Cancer.csv	EYS_TENM2	3692	3615	1271	EYS	TENM2	protein_coding	protein_coding
Colon Colorectal Cancer.csv	IGSF10_TENM2	3510	3377	1147	IGSF10	TENM2	protein_coding	protein_coding
Colon Colorectal Cancer.csv	GPR98_TENM2	3692	3615	1271	GPR98	TENM2	protein_coding	protein_coding
Colon Colorectal Cancer.csv	RYR3_TENM2	3510	3377	1147	RYR3	TENM2	protein_coding	protein_coding
Colon Colorectal Cancer.csv	PCDH15_TENM2	3692	3615	1271	PCDH15	TENM2	protein_coding	protein_coding
Colon Colorectal Cancer.csv	OBSCN_TENM2	3692	3615	1271	OBSCN	TENM2	protein_coding	protein_coding
Colon Colorectal Cancer.csv	FAT2_TENM2	3510	3377	1147	FAT2	TENM2	protein_coding	protein_coding
Colon Colorectal Cancer.csv	PCLO_TENM2	3283	3129	1047	PCLO	TENM2	protein_coding	protein_coding
Colon Colorectal Cancer.csv	SDK1_TENM2	3692	3615	1271	SDK1	TENM2	protein_coding	protein_coding
Colon Colorectal Cancer.csv	LRRK2_TENM2	3510	3377	1147	LRRK2	TENM2	protein_coding	protein_coding
Colon Colorectal Cancer.csv	RYR2_TENM2	3510	3377	1147	RYR2	TENM2	protein_coding	protein_coding
Colon Colorectal Cancer.csv	EP400_TENM3	3283	3129	1047	EP400	TENM3	protein_coding	protein_coding
Colon Colorectal Cancer.csv	PCDH10_TENM3	3283	3129	1047	PCDH10	TENM3	protein_coding	protein_coding
Colon Colorectal Cancer.csv	RIF1_TENM3	3283	3129	1047	RIF1	TENM3	protein_coding	protein_coding
Colon Colorectal Cancer.csv	CIT_TENM3	3283	3129	1047	CIT	TENM3	protein_coding	protein_coding
Colon Colorectal Cancer.csv	DNAH5_TENM3	3283	3129	1047	DNAH5	TENM3	protein_coding	protein_coding
Colon Colorectal Cancer.csv	PLEC_TENM3	3283	3129	1047	PLEC	TENM3	protein_coding	protein_coding
Colon Colorectal Cancer.csv	BSN_TENM3	3510	3377	1147	BSN	TENM3	protein_coding	protein_coding
Colon Colorectal Cancer.csv	LRP2_TENM3	3283	3129	1047	LRP2	TENM3	protein_coding	protein_coding
Colon Colorectal Cancer.csv	ZNF536_TENM3	3510	3377	1147	ZNF536	TENM3	protein_coding	protein_coding
Colon Colorectal Cancer.csv	GNAS_TENM3	3283	3129	1047	GNAS	TENM3	protein_coding	protein_coding
Colon Colorectal Cancer.csv	BMPR2_TENM3	3283	3129	1047	BMPR2	TENM3	protein_coding	protein_coding
Colon Colorectal Cancer.csv	CSMD3_TENM3	3078	2877	962	CSMD3	TENM3	protein_coding	protein_coding
Colon Colorectal Cancer.csv	ZFHX3_TENM3	3283	3129	1047	ZFHX3	TENM3	protein_coding	protein_coding
Colon Colorectal Cancer.csv	ADAMTSL1_TENM3	3078	2877	962	ADAMTSL1	TENM3	protein_coding	protein_coding
Colon Colorectal Cancer.csv	DCHS2_TENM3	3510	3377	1147	DCHS2	TENM3	protein_coding	protein_coding
Colon Colorectal Cancer.csv	DLC1_TENM3	3283	3129	1047	DLC1	TENM3	protein_coding	protein_coding
Colon Colorectal Cancer.csv	MKI67_TENM3	3283	3129	1047	MKI67	TENM3	protein_coding	protein_coding
Colon Colorectal Cancer.csv	NOTCH3_TENM3	3078	2877	962	NOTCH3	TENM3	protein_coding	protein_coding
Colon Colorectal Cancer.csv	LRP1B_TENM4	3692	3615	1271	LRP1B	TENM4	protein_coding	protein_coding
Colon Colorectal Cancer.csv	CEP350_TENM4	3283	3129	1047	CEP350	TENM4	protein_coding	protein_coding
Colon Colorectal Cancer.csv	KMT2C_TENM4	3510	3377	1147	KMT2C	TENM4	protein_coding	protein_coding
Colon Colorectal Cancer.csv	TP53_TENM4	3078	2877	962	TP53	TENM4	protein_coding	protein_coding
Colon Colorectal Cancer.csv	ABCA13_TENM4	3283	3129	1047	ABCA13	TENM4	protein_coding	protein_coding
Colon Colorectal Cancer.csv	SYNE2_TENM4	3692	3615	1271	SYNE2	TENM4	protein_coding	protein_coding
Colon Colorectal Cancer.csv	KMT2C_TEP1	3078	2877	962	KMT2C	TEP1	protein_coding	protein_coding
Colon Colorectal Cancer.csv	RYR1_TEP1	3078	2877	962	RYR1	TEP1	protein_coding	protein_coding
Colon Colorectal Cancer.csv	LRP1B_TET1	3283	3129	1047	LRP1B	TET1	protein_coding	protein_coding
Colon Colorectal Cancer.csv	KMT2C_TET1	3283	3129	1047	KMT2C	TET1	protein_coding	protein_coding
Colon Colorectal Cancer.csv	LRP2_TET1	3283	3129	1047	LRP2	TET1	protein_coding	protein_coding
Colon Colorectal Cancer.csv	MUC16_TET1	3283	3129	1047	MUC16	TET1	protein_coding	protein_coding
Colon Colorectal Cancer.csv	GPR98_TG	3078	2877	962	GPR98	TG	protein_coding	protein_coding
Colon Colorectal Cancer.csv	NEB_TG	3078	2877	962	NEB	TG	protein_coding	protein_coding
Colon Colorectal Cancer.csv	MUC16_TG	3078	2877	962	MUC16	TG	protein_coding	protein_coding
Colon Colorectal Cancer.csv	APC_TIAM1	3510	3377	1147	APC	TIAM1	protein_coding	protein_coding
Colon Colorectal Cancer.csv	SDK1_TIE1	3283	3129	1047	SDK1	TIE1	protein_coding	protein_coding
Colon Colorectal Cancer.csv	LRP1B_TIE1	3078	2877	962	LRP1B	TIE1	protein_coding	protein_coding
Colon Colorectal Cancer.csv	OBSCN_TIE1	3078	2877	962	OBSCN	TIE1	protein_coding	protein_coding
Colon Colorectal Cancer.csv	BMPR2_TIE1	3078	2877	962	BMPR2	TIE1	protein_coding	protein_coding
Colon Colorectal Cancer.csv	MACF1_TIE1	3078	2877	962	MACF1	TIE1	protein_coding	protein_coding
Colon Colorectal Cancer.csv	HMCN1_TIE1	3078	2877	962	HMCN1	TIE1	protein_coding	protein_coding
Colon Colorectal Cancer.csv	ACVR2A_TIE1	3283	3129	1047	ACVR2A	TIE1	protein_coding	protein_coding
Colon Colorectal Cancer.csv	APC_TIE1	3078	2877	962	APC	TIE1	protein_coding	protein_coding
Colon Colorectal Cancer.csv	CSMD1_TIE1	3078	2877	962	CSMD1	TIE1	protein_coding	protein_coding
Colon Colorectal Cancer.csv	MKI67_TIE1	3078	2877	962	MKI67	TIE1	protein_coding	protein_coding
Colon Colorectal Cancer.csv	TTN_TJP2	3283	3129	1047	TTN	TJP2	protein_coding	protein_coding
Colon Colorectal Cancer.csv	NEB_TLN2	3078	2877	962	NEB	TLN2	protein_coding	protein_coding
Colon Colorectal Cancer.csv	MUC16_TLN2	3078	2877	962	MUC16	TLN2	protein_coding	protein_coding
Colon Colorectal Cancer.csv	SYNE1_TLN2	3078	2877	962	SYNE1	TLN2	protein_coding	protein_coding
Colon Colorectal Cancer.csv	FAT4_TNR	3078	2877	962	FAT4	TNR	protein_coding	protein_coding
Colon Colorectal Cancer.csv	DNAH7_TNR	3510	3377	1147	DNAH7	TNR	protein_coding	protein_coding
Colon Colorectal Cancer.csv	KMT2C_TNR	3283	3129	1047	KMT2C	TNR	protein_coding	protein_coding
Colon Colorectal Cancer.csv	MACF1_TNR	3283	3129	1047	MACF1	TNR	protein_coding	protein_coding
Colon Colorectal Cancer.csv	MUC4_TNR	3283	3129	1047	MUC4	TNR	protein_coding	protein_coding
Colon Colorectal Cancer.csv	APOB_TNR	3283	3129	1047	APOB	TNR	protein_coding	protein_coding
Colon Colorectal Cancer.csv	GPR98_TNR	3510	3377	1147	GPR98	TNR	protein_coding	protein_coding
Colon Colorectal Cancer.csv	APC_TNR	3283	3129	1047	APC	TNR	protein_coding	protein_coding
Colon Colorectal Cancer.csv	MUC16_TNRC18	3078	2877	962	MUC16	TNRC18	protein_coding	protein_coding
Colon Colorectal Cancer.csv	KMT2C_TNRC18	3078	2877	962	KMT2C	TNRC18	protein_coding	protein_coding
Colon Colorectal Cancer.csv	TENM3_TNRC6A	3283	3129	1047	TENM3	TNRC6A	protein_coding	protein_coding
Colon Colorectal Cancer.csv	APOB_TNRC6A	3078	2877	962	APOB	TNRC6A	protein_coding	protein_coding
Colon Colorectal Cancer.csv	HMCN1_TNRC6A	3078	2877	962	HMCN1	TNRC6A	protein_coding	protein_coding
Colon Colorectal Cancer.csv	DNAH7_TNRC6B	3078	2877	962	DNAH7	TNRC6B	protein_coding	protein_coding
Colon Colorectal Cancer.csv	KMT2D_TNRC6B	3078	2877	962	KMT2D	TNRC6B	protein_coding	protein_coding
Colon Colorectal Cancer.csv	MUC4_TNXB	3078	2877	962	MUC4	TNXB	protein_coding	protein_coding
Colon Colorectal Cancer.csv	ABCA13_TNXB	3078	2877	962	ABCA13	TNXB	protein_coding	protein_coding
Colon Colorectal Cancer.csv	CIT_TPR	3078	2877	962	CIT	TPR	protein_coding	protein_coding
Colon Colorectal Cancer.csv	PLEC_TRIO	3078	2877	962	PLEC	TRIO	protein_coding	protein_coding
Colon Colorectal Cancer.csv	LRP1_TRIO	3078	2877	962	LRP1	TRIO	protein_coding	protein_coding
Colon Colorectal Cancer.csv	NIPBL_TRIO	3078	2877	962	NIPBL	TRIO	protein_coding	protein_coding
Colon Colorectal Cancer.csv	PCDH10_TRIO	3283	3129	1047	PCDH10	TRIO	protein_coding	protein_coding
Colon Colorectal Cancer.csv	DNAH5_TRIO	3078	2877	962	DNAH5	TRIO	protein_coding	protein_coding
Colon Colorectal Cancer.csv	CDH23_TRIO	3078	2877	962	CDH23	TRIO	protein_coding	protein_coding
Colon Colorectal Cancer.csv	MUC5B_TRIO	3078	2877	962	MUC5B	TRIO	protein_coding	protein_coding
Colon Colorectal Cancer.csv	APOB_TRIO	3078	2877	962	APOB	TRIO	protein_coding	protein_coding
Colon Colorectal Cancer.csv	DNAH8_TRIO	3283	3129	1047	DNAH8	TRIO	protein_coding	protein_coding
Colon Colorectal Cancer.csv	DNAH17_TRIO	3078	2877	962	DNAH17	TRIO	protein_coding	protein_coding
Colon Colorectal Cancer.csv	FREM2_TRIO	3078	2877	962	FREM2	TRIO	protein_coding	protein_coding
Colon Colorectal Cancer.csv	MUC17_TRIO	3078	2877	962	MUC17	TRIO	protein_coding	protein_coding
Colon Colorectal Cancer.csv	VPS13C_TRIO	3283	3129	1047	VPS13C	TRIO	protein_coding	protein_coding
Colon Colorectal Cancer.csv	ROBO1_TRIO	3078	2877	962	ROBO1	TRIO	protein_coding	protein_coding
Colon Colorectal Cancer.csv	KMT2D_TRIO	3078	2877	962	KMT2D	TRIO	protein_coding	protein_coding
Colon Colorectal Cancer.csv	VWF_TRIO	3283	3129	1047	VWF	TRIO	protein_coding	protein_coding
Colon Colorectal Cancer.csv	DNAH1_TRIO	3078	2877	962	DNAH1	TRIO	protein_coding	protein_coding
Colon Colorectal Cancer.csv	LAMA1_TRIO	3078	2877	962	LAMA1	TRIO	protein_coding	protein_coding
Colon Colorectal Cancer.csv	DNAH7_TRIOBP	3283	3129	1047	DNAH7	TRIOBP	protein_coding	protein_coding
Colon Colorectal Cancer.csv	KIAA1109_TRIOBP	3078	2877	962	KIAA1109	TRIOBP	protein_coding	protein_coding
Colon Colorectal Cancer.csv	KMT2D_TRIOBP	3078	2877	962	KMT2D	TRIOBP	protein_coding	protein_coding
Colon Colorectal Cancer.csv	RYR3_TRIOBP	3283	3129	1047	RYR3	TRIOBP	protein_coding	protein_coding
Colon Colorectal Cancer.csv	GNAS_TRIOBP	3078	2877	962	GNAS	TRIOBP	protein_coding	protein_coding
Colon Colorectal Cancer.csv	LAMA1_TRIOBP	3078	2877	962	LAMA1	TRIOBP	protein_coding	protein_coding
Colon Colorectal Cancer.csv	AKAP9_TRIOBP	3283	3129	1047	AKAP9	TRIOBP	protein_coding	protein_coding
Colon Colorectal Cancer.csv	APC_TRIP12	3510	3377	1147	APC	TRIP12	protein_coding	protein_coding
Colon Colorectal Cancer.csv	MUC16_TRIP12	3510	3377	1147	MUC16	TRIP12	protein_coding	protein_coding
Colon Colorectal Cancer.csv	TTN_TRIP12	3283	3129	1047	TTN	TRIP12	protein_coding	protein_coding
Colon Colorectal Cancer.csv	HMCN1_TRPM6	3078	2877	962	HMCN1	TRPM6	protein_coding	protein_coding
Colon Colorectal Cancer.csv	TTN_TRPM6	3078	2877	962	TTN	TRPM6	protein_coding	protein_coding
Colon Colorectal Cancer.csv	APC_TRPS1	3283	3129	1047	APC	TRPS1	protein_coding	protein_coding
Colon Colorectal Cancer.csv	PCDH15_TRPS1	3510	3377	1147	PCDH15	TRPS1	protein_coding	protein_coding
Colon Colorectal Cancer.csv	MUC16_TRPS1	3283	3129	1047	MUC16	TRPS1	protein_coding	protein_coding
Colon Colorectal Cancer.csv	KMT2C_TRPS1	3283	3129	1047	KMT2C	TRPS1	protein_coding	protein_coding
Colon Colorectal Cancer.csv	SYNE1_TRPS1	3283	3129	1047	SYNE1	TRPS1	protein_coding	protein_coding
Colon Colorectal Cancer.csv	UNC13C_TRRAP	3078	2877	962	UNC13C	TRRAP	protein_coding	protein_coding
Colon Colorectal Cancer.csv	NEB_TRRAP	3510	3377	1147	NEB	TRRAP	protein_coding	protein_coding
Colon Colorectal Cancer.csv	CHD8_TRRAP	3078	2877	962	CHD8	TRRAP	protein_coding	protein_coding
Colon Colorectal Cancer.csv	ZNF536_TRRAP	3078	2877	962	ZNF536	TRRAP	protein_coding	protein_coding
Colon Colorectal Cancer.csv	DMD_TRRAP	3283	3129	1047	DMD	TRRAP	protein_coding	protein_coding
Colon Colorectal Cancer.csv	FASN_TRRAP	3078	2877	962	FASN	TRRAP	protein_coding	protein_coding
Colon Colorectal Cancer.csv	TRIO_TRRAP	3078	2877	962	TRIO	TRRAP	protein_coding	protein_coding
Colon Colorectal Cancer.csv	SETD1B_TRRAP	3283	3129	1047	SETD1B	TRRAP	protein_coding	protein_coding
Colon Colorectal Cancer.csv	PCDHA13_TRRAP	3283	3129	1047	PCDHA13	TRRAP	protein_coding	protein_coding
Colon Colorectal Cancer.csv	EYS_TRRAP	3078	2877	962	EYS	TRRAP	protein_coding	protein_coding
Colon Colorectal Cancer.csv	CHD9_TRRAP	3078	2877	962	CHD9	TRRAP	protein_coding	protein_coding
Colon Colorectal Cancer.csv	CIT_TRRAP	3078	2877	962	CIT	TRRAP	protein_coding	protein_coding
Colon Colorectal Cancer.csv	EIF4G1_TRRAP	3078	2877	962	EIF4G1	TRRAP	protein_coding	protein_coding
Colon Colorectal Cancer.csv	TTN_TTC3	3283	3129	1047	TTN	TTC3	protein_coding	protein_coding
Colon Colorectal Cancer.csv	APC_TTK	3510	3377	1147	APC	TTK	protein_coding	protein_coding
Colon Colorectal Cancer.csv	SCAF4_TTN	3510	3377	1147	SCAF4	TTN	protein_coding	protein_coding
Colon Colorectal Cancer.csv	SOX9_TTN	3283	3129	1047	SOX9	TTN	protein_coding	protein_coding
Colon Colorectal Cancer.csv	PPRC1_TTN	3510	3377	1147	PPRC1	TTN	protein_coding	protein_coding
Colon Colorectal Cancer.csv	LRRK1_TTN	3078	2877	962	LRRK1	TTN	protein_coding	protein_coding
Colon Colorectal Cancer.csv	MGA_TTN	3283	3129	1047	MGA	TTN	protein_coding	protein_coding
Colon Colorectal Cancer.csv	DST_UBR4	3078	2877	962	DST	UBR4	protein_coding	protein_coding
Colon Colorectal Cancer.csv	KRAS_UBR4	3078	2877	962	KRAS	UBR4	protein_coding	protein_coding
Colon Colorectal Cancer.csv	CSMD1_UBR4	3078	2877	962	CSMD1	UBR4	protein_coding	protein_coding
Colon Colorectal Cancer.csv	MUC4_UBR4	3078	2877	962	MUC4	UBR4	protein_coding	protein_coding
Colon Colorectal Cancer.csv	PLEC_UBR4	3283	3129	1047	PLEC	UBR4	protein_coding	protein_coding
Colon Colorectal Cancer.csv	ZFHX4_UBR4	3078	2877	962	ZFHX4	UBR4	protein_coding	protein_coding
Colon Colorectal Cancer.csv	SDK1_UBR4	3283	3129	1047	SDK1	UBR4	protein_coding	protein_coding
Colon Colorectal Cancer.csv	DLC1_UBR4	3078	2877	962	DLC1	UBR4	protein_coding	protein_coding
Colon Colorectal Cancer.csv	BRCA2_UBR5	3078	2877	962	BRCA2	UBR5	protein_coding	protein_coding
Colon Colorectal Cancer.csv	RIF1_UBR5	3283	3129	1047	RIF1	UBR5	protein_coding	protein_coding
Colon Colorectal Cancer.csv	SRCAP_UBR5	3078	2877	962	SRCAP	UBR5	protein_coding	protein_coding
Colon Colorectal Cancer.csv	NBEA_UBR5	3510	3377	1147	NBEA	UBR5	protein_coding	protein_coding
Colon Colorectal Cancer.csv	MYCBP2_UBR5	3078	2877	962	MYCBP2	UBR5	protein_coding	protein_coding
Colon Colorectal Cancer.csv	VPS13B_UBR5	3078	2877	962	VPS13B	UBR5	protein_coding	protein_coding
Colon Colorectal Cancer.csv	USH2A_UBR5	3078	2877	962	USH2A	UBR5	protein_coding	protein_coding
Colon Colorectal Cancer.csv	CREBBP_UBR5	3283	3129	1047	CREBBP	UBR5	protein_coding	protein_coding
Colon Colorectal Cancer.csv	LRP2_UBR5	3078	2877	962	LRP2	UBR5	protein_coding	protein_coding
Colon Colorectal Cancer.csv	APC2_UBR5	3283	3129	1047	APC2	UBR5	protein_coding	protein_coding
Colon Colorectal Cancer.csv	PCLO_UBR5	3283	3129	1047	PCLO	UBR5	protein_coding	protein_coding
Colon Colorectal Cancer.csv	PDE4DIP_UBR5	3692	3615	1271	PDE4DIP	UBR5	protein_coding	protein_coding
Colon Colorectal Cancer.csv	SVIL_UBR5	3283	3129	1047	SVIL	UBR5	protein_coding	protein_coding
Colon Colorectal Cancer.csv	PKD1_UBR5	3283	3129	1047	PKD1	UBR5	protein_coding	protein_coding
Colon Colorectal Cancer.csv	NCOR2_UBR5	3283	3129	1047	NCOR2	UBR5	protein_coding	protein_coding
Colon Colorectal Cancer.csv	PKHD1L1_UBR5	3283	3129	1047	PKHD1L1	UBR5	protein_coding	protein_coding
Colon Colorectal Cancer.csv	CACNA1H_UBR5	3078	2877	962	CACNA1H	UBR5	protein_coding	protein_coding
Colon Colorectal Cancer.csv	HERC2_UBR5	3283	3129	1047	HERC2	UBR5	protein_coding	protein_coding
Colon Colorectal Cancer.csv	MYO7A_UBR5	3078	2877	962	MYO7A	UBR5	protein_coding	protein_coding
Colon Colorectal Cancer.csv	DNAH17_UBR5	3078	2877	962	DNAH17	UBR5	protein_coding	protein_coding
Colon Colorectal Cancer.csv	SETD1B_UBR5	3283	3129	1047	SETD1B	UBR5	protein_coding	protein_coding
Colon Colorectal Cancer.csv	C5orf42_UBR5	3283	3129	1047	C5orf42	UBR5	protein_coding	protein_coding
Colon Colorectal Cancer.csv	CHD9_UBR5	3283	3129	1047	CHD9	UBR5	protein_coding	protein_coding
Colon Colorectal Cancer.csv	PCDHA13_UBR5	3078	2877	962	PCDHA13	UBR5	protein_coding	protein_coding
Colon Colorectal Cancer.csv	SPEG_UBR5	3078	2877	962	SPEG	UBR5	protein_coding	protein_coding
Colon Colorectal Cancer.csv	EIF4G1_UBR5	3078	2877	962	EIF4G1	UBR5	protein_coding	protein_coding
Colon Colorectal Cancer.csv	BMPR2_UBR5	3078	2877	962	BMPR2	UBR5	protein_coding	protein_coding
Colon Colorectal Cancer.csv	ITGB4_UBR5	3283	3129	1047	ITGB4	UBR5	protein_coding	protein_coding
Colon Colorectal Cancer.csv	DOCK2_UBR5	3078	2877	962	DOCK2	UBR5	protein_coding	protein_coding
Colon Colorectal Cancer.csv	FREM2_UBR5	3078	2877	962	FREM2	UBR5	protein_coding	protein_coding
Colon Colorectal Cancer.csv	ANK2_UBR5	3510	3377	1147	ANK2	UBR5	protein_coding	protein_coding
Colon Colorectal Cancer.csv	COL22A1_UBR5	3510	3377	1147	COL22A1	UBR5	protein_coding	protein_coding
Colon Colorectal Cancer.csv	CACNA1A_UBR5	3078	2877	962	CACNA1A	UBR5	protein_coding	protein_coding
Colon Colorectal Cancer.csv	TENM3_UBR5	3283	3129	1047	TENM3	UBR5	protein_coding	protein_coding
Colon Colorectal Cancer.csv	GPR112_UBR5	3078	2877	962	GPR112	UBR5	protein_coding	protein_coding
Colon Colorectal Cancer.csv	DCHS2_UBR5	3078	2877	962	DCHS2	UBR5	protein_coding	protein_coding
Colon Colorectal Cancer.csv	ATP10A_UBR5	3283	3129	1047	ATP10A	UBR5	protein_coding	protein_coding
Colon Colorectal Cancer.csv	DMD_UNC13C	1300	1246	509	DMD	UNC13C	protein_coding	protein_coding
Colon Colorectal Cancer.csv	DOCK1_APOB	3078	2877	962	DOCK1	APOB	protein_coding	protein_coding
Colon Colorectal Cancer.csv	N4BP2_APOB	3078	2877	962	N4BP2	APOB	protein_coding	protein_coding
Colon Colorectal Cancer.csv	SMARCA4_APOB	3283	3129	1047	SMARCA4	APOB	protein_coding	protein_coding
Colon Colorectal Cancer.csv	USP34_ARFGEF1	3078	2877	962	USP34	ARFGEF1	protein_coding	protein_coding
Colon Colorectal Cancer.csv	ACVR2A_ARFGEF1	3078	2877	962	ACVR2A	ARFGEF1	protein_coding	protein_coding
Colon Colorectal Cancer.csv	DMD_ARFGEF1	3283	3129	1047	DMD	ARFGEF1	protein_coding	protein_coding
Colon Colorectal Cancer.csv	HERC2_ARFGEF1	3078	2877	962	HERC2	ARFGEF1	protein_coding	protein_coding
Colon Colorectal Cancer.csv	TENM3_ARFGEF1	3078	2877	962	TENM3	ARFGEF1	protein_coding	protein_coding
Colon Colorectal Cancer.csv	RYR1_ARFGEF1	3078	2877	962	RYR1	ARFGEF1	protein_coding	protein_coding
Colon Colorectal Cancer.csv	NEB_ARFGEF1	3510	3377	1147	NEB	ARFGEF1	protein_coding	protein_coding
Colon Colorectal Cancer.csv	TET1_ARFGEF1	3283	3129	1047	TET1	ARFGEF1	protein_coding	protein_coding
Colon Colorectal Cancer.csv	GNAS_ARFGEF1	3078	2877	962	GNAS	ARFGEF1	protein_coding	protein_coding
Colon Colorectal Cancer.csv	CACNA1H_ARFGEF1	3078	2877	962	CACNA1H	ARFGEF1	protein_coding	protein_coding
Colon Colorectal Cancer.csv	RYR2_ARFGEF1	3078	2877	962	RYR2	ARFGEF1	protein_coding	protein_coding
Colon Colorectal Cancer.csv	HMCN1_ARFGEF1	3078	2877	962	HMCN1	ARFGEF1	protein_coding	protein_coding
Colon Colorectal Cancer.csv	MYO15A_ARFGEF1	3078	2877	962	MYO15A	ARFGEF1	protein_coding	protein_coding
Colon Colorectal Cancer.csv	RNF213_ARHGEF17	3078	2877	962	RNF213	ARHGEF17	protein_coding	protein_coding
Colon Colorectal Cancer.csv	DST_ARHGEF17	3078	2877	962	DST	ARHGEF17	protein_coding	protein_coding
Colon Colorectal Cancer.csv	MUC4_ARHGEF17	3283	3129	1047	MUC4	ARHGEF17	protein_coding	protein_coding
Colon Colorectal Cancer.csv	ABCA13_ARHGEF17	3078	2877	962	ABCA13	ARHGEF17	protein_coding	protein_coding
Colon Colorectal Cancer.csv	SYNE2_ARHGEF17	3078	2877	962	SYNE2	ARHGEF17	protein_coding	protein_coding
Colon Colorectal Cancer.csv	OBSCN_ARHGEF5	3510	3377	1147	OBSCN	ARHGEF5	protein_coding	protein_coding
Colon Colorectal Cancer.csv	SYNE2_ARHGEF5	3510	3377	1147	SYNE2	ARHGEF5	protein_coding	protein_coding
Colon Colorectal Cancer.csv	MUC4_ARHGEF5	3510	3377	1147	MUC4	ARHGEF5	protein_coding	protein_coding
Colon Colorectal Cancer.csv	TTN_ARHGEF5	3510	3377	1147	TTN	ARHGEF5	protein_coding	protein_coding
Colon Colorectal Cancer.csv	NIPBL_ARID1A	3078	2877	962	NIPBL	ARID1A	protein_coding	protein_coding
Colon Colorectal Cancer.csv	CACNA1A_ARID1A	3078	2877	962	CACNA1A	ARID1A	protein_coding	protein_coding
Colon Colorectal Cancer.csv	KMT2D_ARID1A	3078	2877	962	KMT2D	ARID1A	protein_coding	protein_coding
Colon Colorectal Cancer.csv	CHD9_ARID1A	3078	2877	962	CHD9	ARID1A	protein_coding	protein_coding
Colon Colorectal Cancer.csv	AFF2_ASCC3	3078	2877	962	AFF2	ASCC3	protein_coding	protein_coding
Colon Colorectal Cancer.csv	SETD1B_ASCC3	3078	2877	962	SETD1B	ASCC3	protein_coding	protein_coding
Colon Colorectal Cancer.csv	CSMD2_ASCC3	3510	3377	1147	CSMD2	ASCC3	protein_coding	protein_coding
Colon Colorectal Cancer.csv	PRRC2C_ASCC3	3078	2877	962	PRRC2C	ASCC3	protein_coding	protein_coding
Colon Colorectal Cancer.csv	ANK2_ASCC3	3283	3129	1047	ANK2	ASCC3	protein_coding	protein_coding
Colon Colorectal Cancer.csv	LRRK2_ASCC3	3283	3129	1047	LRRK2	ASCC3	protein_coding	protein_coding
Colon Colorectal Cancer.csv	MGAM_ASCC3	3078	2877	962	MGAM	ASCC3	protein_coding	protein_coding
Colon Colorectal Cancer.csv	EP400_ASCC3	3283	3129	1047	EP400	ASCC3	protein_coding	protein_coding
Colon Colorectal Cancer.csv	VPS13B_ASCC3	3078	2877	962	VPS13B	ASCC3	protein_coding	protein_coding
Colon Colorectal Cancer.csv	COL6A3_ASCC3	3078	2877	962	COL6A3	ASCC3	protein_coding	protein_coding
Colon Colorectal Cancer.csv	BMPR2_ASCC3	3078	2877	962	BMPR2	ASCC3	protein_coding	protein_coding
Colon Colorectal Cancer.csv	HERC2_ASCC3	3078	2877	962	HERC2	ASCC3	protein_coding	protein_coding
Colon Colorectal Cancer.csv	TENM3_ASCC3	3283	3129	1047	TENM3	ASCC3	protein_coding	protein_coding
Colon Colorectal Cancer.csv	NCOR1_ASCC3	3283	3129	1047	NCOR1	ASCC3	protein_coding	protein_coding
Colon Colorectal Cancer.csv	GRIK3_ASCC3	3078	2877	962	GRIK3	ASCC3	protein_coding	protein_coding
Colon Colorectal Cancer.csv	RIF1_ASCC3	3078	2877	962	RIF1	ASCC3	protein_coding	protein_coding
Colon Colorectal Cancer.csv	DCHS1_ASCC3	3283	3129	1047	DCHS1	ASCC3	protein_coding	protein_coding
Colon Colorectal Cancer.csv	DCHS2_ASCC3	3078	2877	962	DCHS2	ASCC3	protein_coding	protein_coding
Colon Colorectal Cancer.csv	PCNX_ASCC3	3078	2877	962	PCNX	ASCC3	protein_coding	protein_coding
Colon Colorectal Cancer.csv	EVPL_ASCC3	3283	3129	1047	EVPL	ASCC3	protein_coding	protein_coding
Colon Colorectal Cancer.csv	CSMD2_ASPM	3283	3129	1047	CSMD2	ASPM	protein_coding	protein_coding
Colon Colorectal Cancer.csv	APOB_ASPM	3283	3129	1047	APOB	ASPM	protein_coding	protein_coding
Colon Colorectal Cancer.csv	NEB_ASPM	3510	3377	1147	NEB	ASPM	protein_coding	protein_coding
Colon Colorectal Cancer.csv	LRP1B_ASPM	3283	3129	1047	LRP1B	ASPM	protein_coding	protein_coding
Colon Colorectal Cancer.csv	OBSCN_ASPM	3078	2877	962	OBSCN	ASPM	protein_coding	protein_coding
Colon Colorectal Cancer.csv	SDK1_ASXL3	3078	2877	962	SDK1	ASXL3	protein_coding	protein_coding
Colon Colorectal Cancer.csv	GPR98_ATAD2B	3078	2877	962	GPR98	ATAD2B	protein_coding	protein_coding
Colon Colorectal Cancer.csv	TRRAP_ATAD2B	3078	2877	962	TRRAP	ATAD2B	protein_coding	protein_coding
Colon Colorectal Cancer.csv	MUC16_ATAD5	3283	3129	1047	MUC16	ATAD5	protein_coding	protein_coding
Colon Colorectal Cancer.csv	TTN_ATAD5	3283	3129	1047	TTN	ATAD5	protein_coding	protein_coding
Colon Colorectal Cancer.csv	SYNE1_ATAD5	3283	3129	1047	SYNE1	ATAD5	protein_coding	protein_coding
Colon Colorectal Cancer.csv	ACVR2A_ATF7IP	3283	3129	1047	ACVR2A	ATF7IP	protein_coding	protein_coding
Colon Colorectal Cancer.csv	COL22A1_ATF7IP	3078	2877	962	COL22A1	ATF7IP	protein_coding	protein_coding
Colon Colorectal Cancer.csv	SDK1_ATG2A	3078	2877	962	SDK1	ATG2A	protein_coding	protein_coding
[truncated: 21,487 more rows]
